# Supplementary material for: Mechanic Insight into the Distinct and Common Roles of Ovariectomy Versus Adrenalectomy on Adipose Tissue Remodeling in Female Mice
Source: MDPI journal article supplement (doi:10.3390/ijms24032308), 2023-01-24
Supplement: s1 [file s1]

---

|                                                                                                 |    |
|-------------------------------------------------------------------------------------------------|----|
| <b>Supplementary tables:</b>                                                                    | 1  |
| Tabel S1 Differentially expressed genes (DEGs) in pairwise groups;                              | 2  |
| Tabel S2 Functional enrichment analysis of DEGs using DAVID;                                    | 3  |
| Table S3 Common regulated DEGs by both OVX and ADX;                                             | 4  |
| Tabel S4 Functional enrichment analysis of common DEGs using DAVID;                             | 5  |
| Table S5 SAT selectively expressed DEGs under ADX treatment;                                    | 6  |
| Table S6 Distinct DEGs induced by OVX or ADX;                                                   | 7  |
| Table S7 Functional enrichment analysis of the distinct DEGs induced by OVX or ADX using DAVID. | 8  |
|                                                                                                 | 9  |
|                                                                                                 | 10 |
