# Supplementary material for: Mechanic Insight into the Distinct and Common Roles of Ovariectomy Versus Adrenalectomy on Adipose Tissue Remodeling in Female Mice
Source: Int J Mol Sci. 2023 Jan 24;24(3):2308. doi: 10.3390/ijms24032308 (PMC9916485; doi:10.3390/ijms24032308)
Supplement: Supplementary file 1 [file ijms-24-02308-s001.zip]

Archive with 9 entries (9 files):
- Supplemental Materials.pdf
- Supplemental tables.pdf
- Tabel S1 Differentially expressed genes (DEGs) in pairwise groups.xlsx
- Tabel S2 Functional enrichment analysis of DEGs using DAVID.xlsx
- Tabel S4 Functional enrichment analysis of common DEGs using DAVID.xlsx
- Table S3 Common regulated DEGs by both OVX and ADX.xlsx
- Table S5 SAT selectivily expressed DEGs under ADX treatment.xlsx
- Table S6 Distinct DEGs induced by OVX or ADX.xlsx
- Table S7 Functional enrichment analysis of the distinct DEGs induced by OVX or ADX using DAVID.xlsx
