# Supplementary material for: Mechanic Insight into the Distinct and Common Roles of Ovariectomy Versus Adrenalectomy on Adipose Tissue Remodeling in Female Mice
Source: Int J Mol Sci. 2023 Jan 24;24(3):2308. doi: 10.3390/ijms24032308 (PMC9916485; doi:10.3390/ijms24032308)
Supplement: Supplementary file 1 [file ijms-24-02308-s001.zip › Tabel S1 Differentially expressed genes (DEGs) in pairwise groups.xlsx]

## Sheet: DEGs OV vs CV
gene_id	gene_name	OV1	OV2	CV1	CV2	OV	CV	FC	log2FoldChange	pvalue	padj
ENSMUSG00000091307	Gm8895	157.216	121.803	1.94566	7.195	139.509	4.57033	30.8685	4.94806	2.22436e-14	1.80469e-11
ENSMUSG00000066366	Serpina1a	159.244	161.754	15.5653	24.6686	160.499	20.1169	7.9998	2.99996	1.22296e-11	5.95336e-09
ENSMUSG00000051596	Otop1	78.1006	285.505	17.511	34.9471	181.803	26.2291	6.94954	2.79692	4.21111e-07	9.4614e-05
ENSMUSG00000002341	Ncan	41.5861	78.928	6.80982	11.3064	60.257	9.05813	6.67418	2.73859	7.55754e-05	0.00668103
ENSMUSG00000045102	Poln	152.144	157.856	25.2936	29.8079	155	27.5507	5.63088	2.49336	2.03818e-09	7.25991e-07
ENSMUSG00000044083	Efcab8	68.972	94.5188	7.78265	22.6129	81.7454	15.1978	5.40407	2.43405	5.14128e-05	0.00503915
ENSMUSG00000066364	Serpina3b	520.333	584.652	92.419	118.204	552.492	105.311	5.25121	2.39265	7.44651e-20	1.20832e-16
ENSMUSG00000059824	Dbp	415.861	193.91	59.3427	61.6714	304.885	60.5071	5.03751	2.33271	9.56807e-10	3.58287e-07
ENSMUSG00000066687	Zbtb16	2814.67	1434.35	635.259	565.322	2124.51	600.29	3.53853	1.82315	6.10964e-12	3.07673e-09
ENSMUSG00000021775	Nr1d2	1190.78	908.16	272.393	326.859	1049.47	299.626	3.50335	1.80874	1.46711e-15	1.33911e-12
ENSMUSG00000045620	Odf3l1	97.3722	114.982	32.1034	29.8079	106.177	30.9557	3.42955	1.77802	9.0405e-05	0.00761794
ENSMUSG00000099719	Gm28802	166.344	112.058	29.1849	52.4207	139.201	40.8028	3.41682	1.77265	6.34873e-05	0.00590553
ENSMUSG00000045776	Lrtm1	129.83	213.398	37.9404	66.8107	171.614	52.3756	3.28301	1.71502	4.323e-05	0.00432419
ENSMUSG00000028957	Per3	1094.42	678.196	265.583	286.772	886.31	276.178	3.20902	1.68213	5.23731e-11	2.39018e-08
ENSMUSG00000022389	Tef	2709.18	1827.04	732.542	771.921	2268.11	752.231	3.01506	1.59219	1.24089e-13	9.5379e-11
ENSMUSG00000024935	Slc1a1	183.587	108.161	52.5329	44.1979	145.874	48.3654	3.01309	1.59125	0.000149112	0.010834
ENSMUSG00000096768	Gm47283	249.516	127.649	58.3699	70.9222	188.583	64.646	2.91724	1.5446	0.000117767	0.00929658
ENSMUSG00000009378	Slc16a12	389.489	278.684	100.202	131.566	334.087	115.884	2.88422	1.52818	5.33976e-07	0.000116391
ENSMUSG00000010064	Slc38a3	178.516	162.728	54.4786	68.8664	170.622	61.6725	2.76843	1.46907	4.98591e-05	0.00491989
ENSMUSG00000041737	Tmem45b	3243.71	4589.52	1109.03	1730.91	3916.62	1419.97	2.75877	1.46403	3.87673e-10	1.66517e-07
ENSMUSG00000003949	Hlf	268.788	287.454	92.419	112.036	278.121	102.228	2.7223	1.44482	1.30905e-06	0.000233139
ENSMUSG00000055866	Per2	586.262	271.863	196.512	119.231	429.063	157.872	2.71519	1.44105	5.61522e-05	0.00539504
ENSMUSG00000031442	Mcf2l	2083.36	921.802	534.085	580.739	1502.58	557.412	2.69543	1.43052	1.06656e-06	0.000203465
ENSMUSG00000030683	Sez6l2	114.615	99.3909	43.7774	35.975	107.003	39.8762	2.68114	1.42284	0.00111834	0.049342
ENSMUSG00000044338	Aplnr	1950.49	1803.65	679.036	794.534	1877.07	736.785	2.54802	1.34938	4.72332e-13	3.44897e-10
ENSMUSG00000072235	Tuba1a	7248.14	5526.91	2569.25	2688.87	6387.53	2629.06	2.42956	1.28069	2.19033e-12	1.45398e-09
ENSMUSG00000096255	Dynlt1b	172.43	148.112	61.2884	74.0057	160.271	67.6471	2.37018	1.245	0.000598585	0.032021
ENSMUSG00000059201	Lep	12358.2	10285	4439.03	5130.04	11321.6	4784.53	2.36633	1.24265	7.2387e-13	5.034e-10
ENSMUSG00000041696	Rasl12	951.408	1369.06	477.66	505.706	1160.23	491.683	2.36018	1.2389	3.39081e-08	1.0536e-05
ENSMUSG00000029059	Prxl2b	1503.18	925.699	490.307	539.625	1214.44	514.966	2.35817	1.23767	3.33621e-07	7.61281e-05
ENSMUSG00000086584	Gm12002	268.788	276.735	132.305	109.981	272.762	121.143	2.25054	1.17027	6.18955e-05	0.00579437
ENSMUSG00000063060	Sox7	711.02	466.747	250.991	274.438	588.884	262.714	2.24135	1.16437	7.89276e-06	0.00102005
ENSMUSG00000064358	mt-Co3	3352.24	3034.34	1397.96	1477.03	3193.29	1437.49	2.22146	1.15151	1.35852e-11	6.39997e-09
ENSMUSG00000102070	Gm28661	3046.94	5365.16	1684.94	2135.89	4206.05	1910.42	2.20188	1.13873	2.44229e-06	0.000387687
ENSMUSG00000042834	Nrep	1028.49	1014.37	359.948	568.405	1021.43	464.176	2.20157	1.13853	1.73295e-06	0.000281201
ENSMUSG00000038217	Tlcd2	701.891	1550.3	574.943	450.202	1126.1	512.572	2.19697	1.13551	0.000153001	0.0110615
ENSMUSG00000020889	Nr1d1	2259.85	1517.17	1090.54	636.244	1888.51	863.394	2.18661	1.1287	1.46352e-05	0.00182545
ENSMUSG00000082691	Dynlt1-ps1	339.788	358.587	149.816	174.736	349.188	162.276	2.1527	1.10615	3.24073e-05	0.00342954
ENSMUSG00000042041	2010003K11Rik	331.674	587.575	223.751	206.599	459.625	215.175	2.13643	1.0952	0.000207137	0.0141784
ENSMUSG00000026678	Rgs5	13527.6	9216.07	5053.86	5600.79	11371.9	5327.33	2.13462	1.09398	3.67629e-08	1.11851e-05
ENSMUSG00000101111	Gm28437	1490	2059.92	662.498	1006.27	1774.96	834.385	2.12794	1.08946	4.39029e-06	0.000610626
ENSMUSG00000049999	Ppp1r3d	495.99	538.854	211.104	282.661	517.422	246.883	2.09705	1.06836	1.62308e-05	0.00197529
ENSMUSG00000038007	Acer2	1192.81	686.966	371.622	531.402	939.888	451.512	2.08192	1.05792	0.000120435	0.00942802
ENSMUSG00000030087	Klf15	2072.2	1211.2	670.281	908.626	1641.7	789.453	2.07968	1.05636	3.28383e-05	0.00345015
ENSMUSG00000026672	Optn	846.935	1049.45	408.589	505.706	948.193	457.148	2.07492	1.05305	1.60013e-06	0.000268016
ENSMUSG00000064339	mt-Rnr2	10102.4	16429.7	5021.76	7881.61	13266	6451.68	2.05631	1.04005	2.12469e-05	0.00242413
ENSMUSG00000045382	Cxcr4	332.688	350.791	126.468	207.627	341.74	167.048	2.0477	1.034	0.000518812	0.0284839
ENSMUSG00000032452	Clstn2	261.688	227.04	115.767	126.426	244.364	121.097	2.01809	1.01299	0.000696783	0.0357046
ENSMUSG00000083396	Gm15542	211.987	231.912	107.011	113.064	221.95	110.038	2.01751	1.01258	0.000962788	0.0443551
ENSMUSG00000042249	Grk3	487.875	980.267	357.029	371.056	734.071	364.043	2.01697	1.01219	0.0004984	0.0275706
ENSMUSG00000096780	Tmem181b-ps	456.432	393.666	191.648	232.296	425.049	211.972	2.00576	1.00415	7.91281e-05	0.00683779
ENSMUSG00000032401	Lctl	783.035	855.541	425.127	393.669	819.288	409.398	2.00106	1.00077	1.37037e-06	0.000238249
ENSMUSG00000049303	Syt12	325.588	261.145	132.305	161.374	293.366	146.839	1.99837	0.998824	0.000558508	0.0303214
ENSMUSG00000064354	mt-Co2	3721.44	4768.81	2141.2	2116.36	4245.13	2128.78	1.99422	0.995827	3.96553e-08	1.18189e-05
ENSMUSG00000100862	Gm10925	2626.01	2958.34	1122.65	1703.16	2792.17	1412.9	1.97659	0.983014	4.20964e-06	0.00059687
ENSMUSG00000057315	Arhgap24	599.448	590.499	335.627	267.243	594.973	301.435	1.97301	0.980399	2.19028e-05	0.00247961
ENSMUSG00000006611	Hfe	2800.47	2199.27	1183.94	1405.08	2499.87	1294.51	1.93122	0.949512	1.02464e-06	0.000202214
ENSMUSG00000037010	Apln	509.176	482.338	243.208	278.549	495.757	260.879	1.90075	0.926567	8.14348e-05	0.00699573
ENSMUSG00000110344	Gm45716	827.664	1013.4	409.562	569.433	920.53	489.498	1.88139	0.9118	7.48972e-05	0.00666951
ENSMUSG00000002058	Unc119	1025.45	1063.09	522.411	591.018	1044.27	556.714	1.87611	0.907747	3.92372e-06	0.000561785
ENSMUSG00000059811	Atl2	2909	2232.4	1229.66	1511.98	2570.7	1370.82	1.8754	0.907198	5.49592e-06	0.000750116
ENSMUSG00000003038	Hmgn2	999.08	963.702	414.426	638.299	981.391	526.363	1.86522	0.899348	0.00012289	0.00946035
ENSMUSG00000023915	Tnfrsf21	698.849	617.782	367.73	341.249	658.315	354.489	1.8567	0.892737	4.28932e-05	0.00432009
ENSMUSG00000035877	Zhx3	1617.8	1059.19	668.335	783.227	1338.5	725.781	1.8442	0.882996	0.000126336	0.00960944
ENSMUSG00000000628	Hk2	1961.64	2765.4	1212.15	1360.88	2363.52	1286.52	1.83739	0.877662	1.85844e-05	0.00220656
ENSMUSG00000033032	Afap1l1	1011.25	707.429	449.448	509.817	859.34	479.633	1.79162	0.841264	0.000288731	0.0180004
ENSMUSG00000027669	Gnb4	947.351	760.048	438.747	514.957	853.699	476.852	1.79043	0.840307	0.000113966	0.00919537
ENSMUSG00000064372	mt-Tp	2354.18	3147.38	1401.85	1672.32	2750.78	1537.09	1.78985	0.839838	2.45819e-05	0.00269921
ENSMUSG00000027533	Fabp5	2348.09	4379.04	1802.66	1969.37	3363.57	1886.02	1.78357	0.834772	0.000673952	0.0349021
ENSMUSG00000023019	Gpd1	14531.8	26373.7	12254.8	10854.2	20452.7	11554.5	1.77012	0.82385	0.000421832	0.0243495
ENSMUSG00000021701	Plk2	612.634	698.659	342.437	404.976	655.646	373.706	1.75504	0.811502	0.000264798	0.0171872
ENSMUSG00000018217	Pmp22	4195.12	5435.32	2726.85	2760.82	4815.22	2743.84	1.75499	0.811461	7.54089e-06	0.000983278
ENSMUSG00000056313	Tcim	1243.52	1003.65	593.427	689.692	1123.59	641.56	1.75144	0.808545	9.07643e-05	0.00761794
ENSMUSG00000018169	Mfng	2091.47	1619.49	1043.85	1083.36	1855.48	1063.6	1.74443	0.802757	3.42414e-05	0.00357186
ENSMUSG00000020593	Lpin1	9031.27	7858.7	4973.11	4751.78	8444.99	4862.45	1.73674	0.796379	1.07277e-06	0.000203465
ENSMUSG00000073565	Prr16	699.863	541.778	330.763	385.446	620.82	358.105	1.73373	0.793879	0.000708957	0.0360753
ENSMUSG00000033488	Cryzl2	494.975	469.671	274.338	285.744	482.323	280.041	1.72238	0.784406	0.000680511	0.0351172
ENSMUSG00000027750	Postn	9179.36	7992.19	4942.96	5167.04	8585.78	5055	1.69847	0.764233	2.76512e-06	0.000425071
ENSMUSG00000053907	Mat2a	5170.87	3825.57	2446.67	2858.47	4498.22	2652.57	1.69581	0.761974	8.33017e-05	0.00711426
ENSMUSG00000024924	Vldlr	2052.93	2027.77	1040.93	1366.02	2040.35	1203.48	1.69566	0.761851	7.77602e-05	0.00675958
ENSMUSG00000039782	Cpeb2	1941.36	2593.91	1249.12	1428.72	2267.63	1338.92	1.69387	0.76032	0.000127796	0.00962027
ENSMUSG00000032279	Idh3a	4067.32	5376.85	2537.14	3059.93	4722.08	2798.54	1.68748	0.754872	8.99984e-05	0.00761794
ENSMUSG00000042429	Adora1	1216.14	815.59	616.775	589.99	1015.86	603.383	1.68329	0.75128	0.00103788	0.0464945
ENSMUSG00000054720	Lrrc8c	1168.47	1011.45	664.444	633.16	1089.96	648.802	1.67974	0.748237	0.00013099	0.00976009
ENSMUSG00000098188	Sowahc	2375.48	2537.39	1424.23	1516.09	2456.43	1470.16	1.67096	0.740681	1.47496e-05	0.00182545
ENSMUSG00000030747	Dgat2	40641.7	51446.5	28109	27575.4	46044.1	27842.2	1.65376	0.725749	2.03944e-05	0.00236381
ENSMUSG00000029385	Ccng2	1266.85	1035.81	595.373	799.673	1151.33	697.523	1.65089	0.72324	0.000889069	0.0421114
ENSMUSG00000067279	Ppp1r3c	923.007	1017.29	633.313	550.932	970.151	592.122	1.63825	0.712152	0.000384731	0.0228399
ENSMUSG00000024747	Aldh1a7	3736.66	5264.79	2673.34	2842.03	4500.73	2757.68	1.63216	0.706784	0.000289652	0.0180004
ENSMUSG00000090523	Gypc	939.236	1167.36	598.291	694.832	1053.3	646.561	1.62948	0.704413	0.000703567	0.0359262
ENSMUSG00000026473	Glul	22224.2	24016.5	12781.1	15733.4	23120.4	14257.2	1.62169	0.697494	3.71887e-05	0.00382468
ENSMUSG00000000440	Pparg	4491.29	4735.68	2797.86	2909.86	4613.49	2853.86	1.61662	0.692976	1.70347e-05	0.00205599
ENSMUSG00000038375	Trp53inp2	6052.29	5027.03	2970.05	3895.58	5539.66	3432.82	1.61381	0.690467	0.000283349	0.0177645
ENSMUSG00000039735	Fnbp1l	985.894	830.206	564.242	572.517	908.05	568.379	1.59749	0.675803	0.000881189	0.0420048
ENSMUSG00000054690	Emcn	954.451	941.29	530.193	657.829	947.87	594.011	1.59609	0.674539	0.00101105	0.0457259
ENSMUSG00000028557	Rnf11	5045.1	5683.79	2973.95	3771.21	5364.45	3372.58	1.59073	0.669686	0.000211943	0.0143297
ENSMUSG00000026833	Olfm1	1329.74	1096.22	796.749	733.89	1212.98	765.32	1.58467	0.664186	0.000749873	0.0372562
ENSMUSG00000031924	Cyb5b	11512.2	16060.4	8456.82	9009.17	13786.3	8733	1.57868	0.658717	0.000460149	0.0260466
ENSMUSG00000018846	Pank3	16979.3	16565.1	10493	10828.5	16772.2	10660.7	1.57328	0.653771	1.89356e-05	0.00223013
ENSMUSG00000030246	Ldhb	1172.52	1296.95	737.406	839.759	1234.74	788.583	1.56604	0.647121	0.000732363	0.036754
ENSMUSG00000028410	Dnaja1	3810.7	4344.94	2875.69	2340.43	4077.82	2608.06	1.56347	0.644751	0.000338404	0.0208526
ENSMUSG00000020190	Mknk2	13485	13029.9	9528.88	7440.66	13257.5	8484.77	1.56246	0.643818	0.000220183	0.0146161
ENSMUSG00000039956	Mrap	3144.31	4014.61	2245.3	2377.43	3579.46	2311.36	1.54873	0.63109	0.000534688	0.0292456
ENSMUSG00000035376	Hacd2	4266.12	3900.6	2321.18	2966.4	4083.36	2643.79	1.54461	0.627246	0.000573505	0.0310202
ENSMUSG00000032911	Cspg4	1408.85	1344.7	964.076	821.258	1376.78	892.667	1.54207	0.624866	0.000917693	0.0429551
ENSMUSG00000049327	Kmt5a	2912.04	3466.99	1988.47	2158.5	3189.51	2073.48	1.53835	0.621384	0.000414368	0.0240136
ENSMUSG00000027111	Itga6	5225.64	4509.62	3173.38	3317.92	4867.63	3245.65	1.49973	0.5847	0.000474121	0.0263502
ENSMUSG00000016382	Pls3	2310.56	2208.04	1524.43	1500.67	2259.3	1512.55	1.49367	0.578857	0.000638782	0.0335567
ENSMUSG00000030249	Abcc9	1879.49	1798.78	1207.28	1264.26	1839.13	1235.77	1.48827	0.573637	0.000987955	0.0449473
ENSMUSG00000005360	Slc1a3	3030.71	3265.28	4776.6	4369.42	3148	4573.01	-1.45268	-0.538715	0.00103045	0.0463036
ENSMUSG00000040249	Lrp1	12705	11188.3	18132.6	16631.8	11946.7	17382.2	-1.455	-0.541021	0.000785685	0.0382471
ENSMUSG00000007892	Rplp1	5068.43	4514.49	7525.82	6627.62	4791.46	7076.72	-1.477	-0.56267	0.000731567	0.036754
ENSMUSG00000056427	Slit3	1779.07	1705.24	2855.26	2397.99	1742.15	2626.63	-1.50781	-0.59245	0.000815213	0.0395527
ENSMUSG00000027593	Raly	1672.57	1429.47	2546.87	2168.78	1551.02	2357.83	-1.52036	-0.60441	0.00101133	0.0457259
ENSMUSG00000089774	Slc5a3	3040.85	3521.55	5015.92	5043.7	3281.2	5029.81	-1.53286	-0.616228	0.000210471	0.0142964
ENSMUSG00000033161	Atp1a1	1761.83	2058.95	3258.01	2608.7	1910.39	2933.36	-1.5355	-0.618707	0.000951975	0.0441356
ENSMUSG00000032359	Ctsh	860.121	766.869	1309.43	1193.34	813.495	1251.39	-1.5385	-0.621525	0.00104153	0.0465152
ENSMUSG00000036594	H2-Aa	3362.38	4034.1	6345.78	5069.39	3698.24	5707.59	-1.54333	-0.626046	0.000662314	0.0346682
ENSMUSG00000006205	Htra1	3444.54	3016.8	5043.16	4998.47	3230.67	5020.81	-1.55416	-0.636134	0.000115519	0.00926584
ENSMUSG00000002602	Axl	2322.73	2582.21	4254.19	3416.6	2452.47	3835.4	-1.56392	-0.645171	0.000351994	0.0214188
ENSMUSG00000024713	Pcsk5	526.419	486.236	814.26	791.45	506.327	802.855	-1.58581	-0.665219	0.000987661	0.0449473
ENSMUSG00000029860	Zyx	1396.68	1542.51	2717.12	1952.93	1469.59	2335.02	-1.58899	-0.668113	0.000913961	0.042918
ENSMUSG00000051495	Irf2bp2	998.065	940.316	1506.92	1576.73	969.19	1541.82	-1.59086	-0.669805	0.000189847	0.0132025
ENSMUSG00000024621	Csf1r	1902.82	2074.54	3503.17	2890.33	1988.68	3196.75	-1.60752	-0.684834	0.000123509	0.00946035
ENSMUSG00000034320	Slc26a2	602.491	636.296	1121.67	870.595	619.394	996.135	-1.60845	-0.685668	0.00104568	0.0465582
ENSMUSG00000058297	Spock2	560.905	465.773	808.423	853.122	513.339	830.772	-1.61858	-0.694724	0.000850899	0.0407427
ENSMUSG00000034612	Chst11	509.176	478.44	842.472	761.642	493.808	802.057	-1.62447	-0.699971	0.000613859	0.0327182
ENSMUSG00000037321	Tap1	733.335	658.708	1072.06	1202.59	696.021	1137.33	-1.63405	-0.708452	0.000262529	0.017116
ENSMUSG00000025934	Gsta3	2098.57	1645.8	3170.46	2947.89	1872.18	3059.18	-1.63418	-0.708563	0.000120838	0.00942802
ENSMUSG00000036905	C1qb	1526.51	1294.03	2386.36	2251.01	1410.27	2318.68	-1.6443	-0.717474	6.01147e-05	0.00566396
ENSMUSG00000021215	Net1	2823.79	2316.2	3687.03	4775.43	2570	4231.23	-1.64639	-0.719305	0.000178244	0.0124914
ENSMUSG00000024610	Cd74	8677.28	9236.53	17163.7	12559.4	8956.91	14861.5	-1.65925	-0.730529	7.59416e-05	0.00668103
ENSMUSG00000038642	Ctss	462.518	650.913	922.244	928.155	556.715	925.2	-1.66146	-0.732455	0.000951979	0.0441356
ENSMUSG00000054072	Iigp1	1009.22	1184.89	1457.3	2190.36	1097.06	1823.83	-1.66216	-0.733055	0.000891019	0.0421114
ENSMUSG00000027597	Ahcy	461.504	498.903	823.015	773.977	480.203	798.496	-1.66279	-0.733603	0.00031939	0.0197643
ENSMUSG00000073421	H2-Ab1	3136.2	3029.47	5855.47	4397.17	3082.83	5126.32	-1.66295	-0.733744	7.17516e-05	0.00646827
ENSMUSG00000017969	Ptgis	560.905	727.892	1103.19	1047.39	644.398	1075.29	-1.66841	-0.738471	0.000363731	0.0220412
ENSMUSG00000078853	Igtp	387.46	446.284	634.286	758.559	416.872	696.422	-1.67009	-0.73993	0.000780595	0.0382423
ENSMUSG00000073489	Ifi204	530.476	688.915	935.864	1105.97	609.695	1020.92	-1.67399	-0.743288	0.000539381	0.0293922
ENSMUSG00000069874	Irgm2	869.25	862.362	1249.12	1659.99	865.806	1454.55	-1.67978	-0.748268	0.000216749	0.0144539
ENSMUSG00000060586	H2-Eb1	3104.75	3247.74	5963.46	4720.95	3176.25	5342.2	-1.68197	-0.750155	2.31408e-05	0.00256022
ENSMUSG00000001128	Cfp	654.22	861.387	1300.68	1256.04	757.804	1278.36	-1.68666	-0.754168	0.000213301	0.014355
ENSMUSG00000019970	Sgk1	766.806	613.885	1091.52	1244.74	690.345	1168.13	-1.69222	-0.75892	0.000200977	0.0139103
ENSMUSG00000015340	Cybb	379.346	552.496	773.401	813.035	465.921	793.218	-1.7019	-0.76715	0.000974556	0.044756
ENSMUSG00000038393	Txnip	16290.6	9239.45	21163	22387.8	12765	21775.4	-1.70589	-0.770525	0.000673309	0.0349021
ENSMUSG00000031453	Rasa3	2086.4	2553.96	4602.47	3333.34	2320.18	3967.9	-1.71019	-0.77416	0.000121369	0.00942802
ENSMUSG00000044786	Zfp36	609.591	405.359	942.674	798.645	507.475	870.659	-1.71633	-0.779324	0.00108829	0.0481617
ENSMUSG00000044017	Adgrd1	1093.41	1868.94	2843.59	2265.4	1481.17	2554.49	-1.7245	-0.786177	0.00102912	0.0463036
ENSMUSG00000039741	Bahcc1	401.66	586.601	927.108	780.144	494.131	853.626	-1.72723	-0.788463	0.00082691	0.0398554
ENSMUSG00000055254	Ntrk2	4463.91	3777.83	7269	6983.26	4120.87	7126.13	-1.72934	-0.790223	2.17588e-06	0.000349193
ENSMUSG00000042985	Upk3b	2139.15	3073.32	4637.49	4396.15	2606.23	4516.82	-1.73297	-0.793248	5.96455e-05	0.00566396
ENSMUSG00000057322	Rpl38	598.433	488.185	1120.7	763.698	543.309	942.2	-1.73479	-0.794759	0.000775485	0.0381319
ENSMUSG00000033416	Gucd1	668.42	985.139	1640.19	1229.32	826.779	1434.76	-1.73524	-0.795131	0.000623823	0.0331284
ENSMUSG00000054675	Tmem119	436.146	419.001	790.912	700.999	427.574	745.955	-1.74489	-0.803135	0.000127368	0.00962027
ENSMUSG00000022893	Adamts1	689.72	757.125	1317.21	1218.01	723.422	1267.61	-1.7522	-0.809171	1.83194e-05	0.00219292
ENSMUSG00000034892	Rps29	1076.17	668.452	1580.85	1487.31	872.309	1534.08	-1.75905	-0.814795	0.000394305	0.0231556
ENSMUSG00000036896	C1qc	1103.55	960.778	1875.62	1759.69	1032.17	1817.66	-1.76121	-0.816569	7.133e-06	0.000938472
ENSMUSG00000018008	Cyth4	387.46	421.924	770.483	659.884	404.692	715.183	-1.76731	-0.821553	0.000137628	0.0102026
ENSMUSG00000046805	Mpeg1	613.648	792.204	1361.96	1136.81	702.926	1249.39	-1.77728	-0.829672	7.74544e-05	0.00675958
ENSMUSG00000031075	Ano1	608.576	947.136	1518.59	1251.93	777.856	1385.26	-1.78062	-0.832383	0.00035084	0.0214188
ENSMUSG00000039910	Cited2	488.89	405.359	883.331	709.222	447.124	796.276	-1.78148	-0.833076	0.000178766	0.0124914
ENSMUSG00000041120	Nbl1	1292.21	1367.11	2574.11	2166.72	1329.66	2370.42	-1.78279	-0.834138	3.56284e-06	0.000525573
ENSMUSG00000021390	Ogn	2150.3	2511.08	4188.04	4151.52	2330.69	4169.78	-1.78899	-0.839146	7.29517e-07	0.000156674
ENSMUSG00000006931	P3h4	247.488	240.682	477.66	395.725	244.085	436.693	-1.78955	-0.839595	0.000627994	0.0332291
ENSMUSG00000051906	Cd209f	515.261	629.475	1149.89	901.431	572.368	1025.66	-1.79195	-0.841528	0.000101429	0.00836871
ENSMUSG00000016458	Wt1	309.36	475.517	732.542	679.414	392.438	705.978	-1.79839	-0.846708	0.000580001	0.0312558
ENSMUSG00000033849	B3galt2	4657.64	4363.45	7729.15	8580.55	4510.55	8154.85	-1.80795	-0.854353	1.17794e-07	3.12775e-05
ENSMUSG00000033763	Mtss2	941.265	552.496	1561.39	1151.2	746.881	1356.3	-1.81653	-0.861183	0.000752574	0.0372562
ENSMUSG00000052397	Ezr	361.089	505.724	870.684	713.333	433.406	792.009	-1.82713	-0.86958	0.000228135	0.0150076
ENSMUSG00000078920	Ifi47	250.531	277.71	458.204	520.096	264.12	489.15	-1.85149	-0.888683	0.000173556	0.012304
ENSMUSG00000041202	Pla2g2d	175.473	201.705	370.649	328.914	188.589	349.782	-1.85461	-0.891113	0.000685181	0.0352338
ENSMUSG00000032089	Il10ra	175.473	187.089	364.812	308.357	181.281	336.585	-1.85691	-0.892901	0.000782966	0.0382423
ENSMUSG00000034573	Ptpn13	302.26	528.136	848.309	700.999	415.198	774.654	-1.86523	-0.899357	0.000748252	0.0372562
ENSMUSG00000031980	Agt	1479.85	964.676	2293.94	2282.87	1222.27	2288.4	-1.87255	-0.905008	2.5651e-05	0.00279558
ENSMUSG00000004730	Adgre1	359.06	649.938	1085.68	812.007	504.499	948.844	-1.88039	-0.911035	0.000825296	0.0398554
ENSMUSG00000090733	Rps27	858.093	1393.42	1710.24	2538.81	1125.76	2124.52	-1.88677	-0.915921	0.000252083	0.0165086
ENSMUSG00000020186	Csrp2	281.974	491.108	787.994	684.553	386.541	736.273	-1.90416	-0.929153	0.000474535	0.0263502
ENSMUSG00000067212	H2-T23	1401.75	1446.04	1997.22	3437.15	1423.9	2717.19	-1.90806	-0.93211	6.51899e-05	0.00600794
ENSMUSG00000047793	Sned1	540.619	872.106	1590.58	1134.75	706.362	1362.67	-1.92893	-0.947804	0.000162432	0.0116282
ENSMUSG00000027574	Nkain4	187.644	285.505	489.334	425.533	236.575	457.434	-1.93287	-0.950747	0.000431943	0.0247376
ENSMUSG00000020473	Aebp1	2443.43	4258.22	6987.85	5985.21	3350.83	6486.53	-1.93571	-0.952859	3.8183e-05	0.00389547
ENSMUSG00000070034	Sp110	146.058	181.242	273.366	361.806	163.65	317.586	-1.93941	-0.955616	0.000883009	0.0420048
ENSMUSG00000028967	Errfi1	664.363	672.35	1218.96	1375.27	668.356	1297.12	-1.94059	-0.956494	4.55239e-07	0.000100732
ENSMUSG00000037820	Tgm2	3412.08	2666.01	6212.5	5590.52	3039.05	5901.51	-1.94202	-0.95756	1.22128e-07	3.12905e-05
ENSMUSG00000006014	Prg4	159.244	170.524	288.931	354.611	164.884	321.771	-1.95079	-0.964061	0.000435168	0.0247499
ENSMUSG00000050856	Atp5k	224.159	264.068	529.22	438.895	244.113	484.058	-1.98286	-0.98758	6.00974e-05	0.00566396
ENSMUSG00000074622	Mafb	484.833	410.231	972.832	807.896	447.532	890.364	-1.99009	-0.992831	3.90002e-06	0.000561785
ENSMUSG00000033715	Akr1c14	251.545	320.584	516.574	626.993	286.065	571.783	-1.99788	-0.998467	3.84106e-05	0.00389547
ENSMUSG00000056529	Ptafr	279.945	326.431	670.281	542.709	303.188	606.495	-2.00039	-1.00028	1.97844e-05	0.00231145
ENSMUSG00000036887	C1qa	1120.79	817.539	2042.95	1834.73	969.167	1938.84	-2.00092	-1.00066	8.85951e-07	0.000177239
ENSMUSG00000048387	Osr1	286.031	416.077	822.043	583.823	351.054	702.933	-2.00213	-1.00154	0.000116228	0.00926584
ENSMUSG00000054619	Mettl7a1	4596.78	3738.85	8156.22	8604.19	4167.82	8380.21	-2.01075	-1.00774	4.10039e-09	1.39261e-06
ENSMUSG00000020733	Slc9a3r1	408.76	593.422	1019.53	1003.19	501.091	1011.36	-2.01774	-1.01274	6.93886e-06	0.000921228
ENSMUSG00000061451	Tmem151a	190.687	278.684	476.687	471.787	234.686	474.237	-2.0198	-1.01421	9.92387e-05	0.00823456
ENSMUSG00000047414	Flrt2	335.731	583.678	1054.55	806.868	459.705	930.709	-2.02413	-1.0173	0.000130834	0.00976009
ENSMUSG00000028487	Bnc2	192.716	237.759	501.008	374.14	215.237	437.574	-2.03299	-1.0236	0.000116743	0.00926584
ENSMUSG00000037379	Spon2	422.961	502.801	1098.33	810.979	462.881	954.653	-2.06249	-1.04438	3.77562e-06	0.000551391
ENSMUSG00000017737	Mmp9	350.946	529.11	1141.13	680.442	440.028	910.786	-2.06977	-1.04947	0.000144866	0.0106313
ENSMUSG00000024042	Sik1	458.461	280.633	636.232	902.459	369.547	769.345	-2.08224	-1.05814	9.71784e-05	0.00810968
ENSMUSG00000020027	Socs2	307.331	320.584	621.639	687.637	313.958	654.638	-2.0848	-1.05991	1.30346e-06	0.000233139
ENSMUSG00000034271	Jdp2	306.317	242.631	615.802	539.625	274.474	577.714	-2.10569	-1.07429	6.45849e-06	0.000865319
ENSMUSG00000055980	Irs1	963.579	1001.7	2231.68	1922.09	982.642	2076.88	-2.11366	-1.07974	2.49049e-09	8.65981e-07
ENSMUSG00000028871	Rspo1	332.688	427.77	867.766	746.224	380.229	806.995	-2.12206	-1.08547	1.35046e-06	0.000237617
ENSMUSG00000052934	Fbxo31	615.676	415.103	1207.28	993.938	515.39	1100.61	-2.1363	-1.09511	2.74696e-06	0.000425071
ENSMUSG00000033450	Tagap	107.515	147.137	319.089	228.184	127.326	273.637	-2.14883	-1.10355	0.000473396	0.0263502
ENSMUSG00000056870	Gulp1	565.976	735.687	1515.67	1281.74	650.832	1398.7	-2.14887	-1.10358	1.20813e-07	3.12905e-05
ENSMUSG00000023046	Igfbp6	2398.81	2783.92	6080.2	5075.56	2591.36	5577.88	-2.15247	-1.10599	4.20693e-10	1.75537e-07
ENSMUSG00000035403	Crb2	87.2293	140.317	247.099	244.63	113.773	245.865	-2.15938	-1.11061	0.000632194	0.0333305
ENSMUSG00000026536	Ifi211	123.744	155.907	261.692	343.304	139.826	302.498	-2.16192	-1.11232	0.000166589	0.0118676
ENSMUSG00000054203	Ifi205	408.76	378.075	859.01	843.871	393.418	851.441	-2.16445	-1.114	5.43894e-08	1.55746e-05
ENSMUSG00000090698	Apold1	160.258	107.186	260.719	319.664	133.722	290.191	-2.17097	-1.11834	0.000283424	0.0177645
ENSMUSG00000073418	C4b	5963.03	4129.59	8062.83	13915.1	5046.31	10989	-2.17763	-1.12276	4.3095e-06	0.000605154
ENSMUSG00000068699	Flnc	481.79	815.59	1699.54	1129.62	648.69	1414.58	-2.18042	-1.12461	2.24032e-05	0.00249753
ENSMUSG00000038894	Irs2	1119.78	595.371	2082.83	1695.96	857.576	1889.4	-2.20377	-1.13998	1.03466e-05	0.00131393
ENSMUSG00000020911	Krt19	327.617	516.443	992.288	874.707	422.03	933.497	-2.21127	-1.14487	2.59583e-06	0.000407629
ENSMUSG00000049382	Krt8	132.873	155.907	360.921	281.633	144.39	321.277	-2.2251	-1.15387	5.2504e-05	0.00511179
ENSMUSG00000025017	Pik3ap1	104.472	210.475	332.708	369.001	157.474	350.855	-2.22605	-1.15449	0.000411899	0.0239657
ENSMUSG00000019139	Isyna1	421.946	531.059	1376.56	745.197	476.503	1060.88	-2.22658	-1.15483	2.21087e-05	0.00248366
ENSMUSG00000026938	Fcna	223.145	256.273	572.998	496.455	239.709	534.726	-2.2306	-1.15743	1.20148e-06	0.000219329
ENSMUSG00000044641	Pard6b	75.0578	99.3909	192.621	198.376	87.2243	195.499	-2.23999	-1.16349	0.000514427	0.0283498
ENSMUSG00000032725	Folr2	98.3865	121.803	249.045	247.714	110.095	248.379	-2.25514	-1.17322	0.000110386	0.0090566
ENSMUSG00000048087	Gm4737	67.9577	86.7234	171.218	179.875	77.3405	175.547	-2.26848	-1.18172	0.000671956	0.0349021
ENSMUSG00000083061	Gm12191	130.844	126.675	322.98	269.299	128.759	296.139	-2.30061	-1.20202	2.59547e-05	0.00280772
ENSMUSG00000027322	Siglec1	375.289	497.929	803.559	1209.79	436.609	1006.67	-2.30473	-1.2046	1.15654e-06	0.000213799
ENSMUSG00000062488	Ifit3b	116.644	152.984	224.724	399.836	134.814	312.28	-2.31442	-1.21065	0.000271919	0.0174171
ENSMUSG00000020961	Ston2	78.1006	128.623	279.203	200.432	103.362	239.817	-2.31916	-1.2136	0.000469183	0.0263502
ENSMUSG00000037816	Fbxw17	302.26	252.375	592.454	694.832	277.317	643.643	-2.3212	-1.21487	1.6183e-07	3.93895e-05
ENSMUSG00000022840	Adcy5	3436.43	1969.3	6681.41	6026.33	2702.87	6353.87	-2.351	-1.23327	8.05613e-08	2.21984e-05
ENSMUSG00000037440	Vnn1	119.687	74.0559	160.517	299.106	96.8713	229.812	-2.37264	-1.24649	0.0010721	0.0475893
ENSMUSG00000071637	Cebpd	307.331	152.01	396.915	695.859	229.67	546.387	-2.37964	-1.25075	0.000207763	0.0141784
ENSMUSG00000035692	Isg15	93.315	92.5699	188.729	254.909	92.9425	221.819	-2.38575	-1.25444	0.000123728	0.00946035
ENSMUSG00000034652	Cd300a	92.3007	69.1838	196.512	189.126	80.7423	192.819	-2.38963	-1.25679	0.000221345	0.0146268
ENSMUSG00000045680	Tcf21	93.315	94.5188	264.61	188.098	93.9169	226.354	-2.41111	-1.2697	0.000112037	0.00914073
ENSMUSG00000027875	Hmgcs2	210.973	177.344	537.976	403.948	194.159	470.962	-2.42691	-1.27912	1.1173e-06	0.000209193
ENSMUSG00000018920	Cxcl16	183.587	148.112	438.747	365.917	165.85	402.332	-2.42721	-1.2793	1.72652e-06	0.000281201
ENSMUSG00000091586	Cyp4f17	404.703	330.328	826.907	957.963	367.516	892.435	-2.42861	-1.28013	4.19752e-09	1.3932e-06
ENSMUSG00000035042	Ccl5	73.0292	55.542	185.811	126.426	64.2856	156.119	-2.43107	-1.28159	0.000930743	0.0434267
ENSMUSG00000036098	Myrf	317.474	569.061	1155.72	1004.22	443.268	1079.97	-2.43558	-1.28427	7.85451e-07	0.000166242
ENSMUSG00000019235	Rps6kl1	73.0292	60.4141	201.376	132.594	66.7216	166.985	-2.50499	-1.3248	0.000473453	0.0263502
ENSMUSG00000036596	Cpz	122.73	187.089	400.807	378.251	154.909	389.529	-2.51306	-1.32944	2.92919e-06	0.000445603
ENSMUSG00000028654	Mycl	98.3865	54.5675	193.593	193.237	76.477	193.415	-2.5318	-1.34016	0.000281222	0.0177645
ENSMUSG00000022346	Myc	210.973	182.217	460.149	541.681	196.595	500.915	-2.54816	-1.34945	5.12334e-08	1.49643e-05
ENSMUSG00000027716	Trpc3	96.3579	98.4164	308.388	188.098	97.3872	248.243	-2.55025	-1.35064	6.56134e-05	0.00600794
ENSMUSG00000095304	Plac9a	546.704	1064.07	2362.03	1805.95	805.386	2083.99	-2.58711	-1.37134	2.78835e-07	6.56792e-05
ENSMUSG00000027514	Zbp1	108.529	175.396	209.159	529.347	141.963	369.253	-2.5987	-1.37779	0.000381551	0.0227435
ENSMUSG00000082292	Gm12250	68.972	63.3373	136.196	210.711	66.1547	173.454	-2.62099	-1.39011	0.000214729	0.0143849
ENSMUSG00000040829	Zmynd15	68.972	39.9512	156.626	128.482	54.4616	142.554	-2.62113	-1.39019	0.000713487	0.0361797
ENSMUSG00000029093	Sorcs2	82.1578	179.293	429.992	257.992	130.726	343.992	-2.63005	-1.39509	0.000159619	0.0114831
ENSMUSG00000043969	Emx2	45.6432	54.5675	133.278	133.621	50.1054	133.45	-2.6622	-1.41262	0.000340158	0.0208725
ENSMUSG00000009185	Ccl8	101.429	86.7234	220.833	286.772	94.0764	253.802	-2.69786	-1.43181	6.14195e-06	0.000830528
ENSMUSG00000035202	Lars2	4008.49	2312.3	9358.64	7799.38	3160.39	8579.01	-2.71475	-1.44082	4.49391e-10	1.82303e-07
ENSMUSG00000027656	Ccn5	33.4717	89.6467	179.001	162.401	61.5592	170.701	-2.76898	-1.46935	0.00075053	0.0372562
ENSMUSG00000105096	Gbp10	42.6003	75.0304	127.441	199.404	58.8154	163.423	-2.77428	-1.47211	0.00037425	0.0225849
ENSMUSG00000026077	Npas2	127.801	114.982	328.817	350.499	121.391	339.658	-2.79845	-1.48463	7.55795e-08	2.12262e-05
ENSMUSG00000030748	Il4ra	1049.79	949.085	3105.28	2521.33	999.44	2813.31	-2.81523	-1.49325	1.01577e-15	9.88951e-13
ENSMUSG00000006221	Hspb7	43.6146	45.7977	132.305	121.287	44.7062	126.796	-2.83622	-1.50397	0.000206793	0.0141784
ENSMUSG00000068246	Apol9b	40.5718	61.3885	108.957	181.931	50.9801	145.444	-2.84885	-1.51038	0.000391072	0.0231223
ENSMUSG00000021250	Fos	93.315	50.6699	256.828	154.179	71.9924	205.503	-2.85876	-1.51539	0.000139657	0.0103007
ENSMUSG00000023243	Kcnk5	57.8148	73.0815	215.969	158.29	65.4481	187.129	-2.85882	-1.51542	2.95251e-05	0.00314734
ENSMUSG00000073491	Ifi213	65.9291	110.109	135.224	403.948	88.0193	269.586	-3.0593	-1.6132	0.00026662	0.0172289
ENSMUSG00000025885	Myo5b	84.1864	122.777	289.904	344.332	103.482	317.118	-3.06167	-1.61432	1.39843e-07	3.52115e-05
ENSMUSG00000042842	Serpinb6b	255.602	299.147	968.94	740.057	277.375	854.499	-3.08056	-1.62319	2.45918e-12	1.56147e-09
ENSMUSG00000057346	Apol9a	35.5003	77.9536	120.631	234.351	56.727	177.491	-3.12322	-1.64304	0.000270167	0.0173812
ENSMUSG00000020704	Asic2	72.0149	126.675	361.893	262.104	99.3447	311.998	-3.13845	-1.65005	1.03858e-06	0.000202233
ENSMUSG00000018849	Wwc1	28.4002	27.2838	101.174	77.0893	27.842	89.1319	-3.20301	-1.67943	0.000595971	0.0319984
ENSMUSG00000027004	Frzb	20.2859	29.2326	84.6363	76.0614	24.7592	80.3489	-3.2424	-1.69706	0.000987246	0.0449473
ENSMUSG00000035835	Plppr3	256.616	178.319	746.162	683.525	217.468	714.843	-3.2891	-1.71769	2.88964e-12	1.67492e-09
ENSMUSG00000037868	Egr2	26.3716	38.9768	144.952	75.0336	32.6742	109.993	-3.36576	-1.75093	0.000394806	0.0231556
ENSMUSG00000083411	Rpl30-ps10	88.2436	105.237	313.252	339.193	96.7405	326.222	-3.37044	-1.75294	1.45618e-09	5.31653e-07
ENSMUSG00000039037	St6galnac5	31.4431	37.028	95.3375	139.789	34.2355	117.563	-3.43067	-1.77849	7.41722e-05	0.00664546
ENSMUSG00000025789	St8sia2	18.2573	52.6187	153.707	95.5907	35.438	124.649	-3.51192	-1.81226	0.000403053	0.0235447
ENSMUSG00000057729	Prtn3	58.829	22.4117	171.218	114.092	40.6204	142.655	-3.5198	-1.81549	0.000146202	0.0106757
ENSMUSG00000003477	Inmt	108.529	152.984	492.253	466.647	130.757	479.45	-3.66439	-1.87357	3.60914e-12	1.95214e-09
ENSMUSG00000053117	E330013P04Rik	18.2573	28.2582	76.8537	94.5629	23.2577	85.7083	-3.67937	-1.87946	0.00027839	0.0177538
ENSMUSG00000036856	Wnt4	15.2144	50.6699	137.169	106.897	32.9421	122.033	-3.69681	-1.88628	0.000282944	0.0177645
ENSMUSG00000019787	Trdn	23.3288	35.0791	96.3103	122.315	29.2039	109.313	-3.73752	-1.90208	4.84504e-05	0.0048134
ENSMUSG00000002897	Il17ra	216.045	224.117	976.723	707.166	220.081	841.944	-3.82618	-1.9359	5.29512e-16	5.52357e-13
ENSMUSG00000023992	Trem2	41.5861	70.1583	213.05	219.961	55.8722	216.506	-3.86987	-1.95229	8.3686e-08	2.26324e-05
ENSMUSG00000021396	Nxnl2	21.3002	19.4884	94.3647	67.8386	20.3943	81.1016	-3.97968	-1.99265	0.000178696	0.0124914
ENSMUSG00000021356	Irf4	217.059	258.221	810.369	1090.56	237.64	950.463	-3.99788	-1.99923	1.9624e-17	2.60535e-14
ENSMUSG00000037138	Aff3	121.715	123.751	440.693	552.987	122.733	496.84	-4.04714	-2.0169	1.67031e-14	1.4349e-11
ENSMUSG00000032374	Plod2	595.391	427.77	2224.87	1952.93	511.581	2088.9	-4.08459	-2.03019	3.23542e-22	5.90625e-19
ENSMUSG00000074345	Tnfaip8l3	28.4002	38.0024	162.463	117.176	33.2013	139.819	-4.20935	-2.0736	1.51376e-06	0.000260082
ENSMUSG00000030222	Rerg	13.1858	17.5396	55.4514	77.0893	15.3627	66.2703	-4.3076	-2.10688	0.000378411	0.0226488
ENSMUSG00000018339	Gpx3	6432.65	8993.9	35001.5	32027	7713.28	33514.3	-4.34491	-2.11933	1.83452e-29	5.29697e-26
ENSMUSG00000000204	Slfn4	16.2287	28.2582	37.9404	156.234	22.2434	97.0874	-4.35551	-2.12284	0.000838792	0.0402951
ENSMUSG00000040026	Saa3	16.2287	18.514	77.8265	78.1172	17.3713	77.9718	-4.48644	-2.16557	6.58224e-05	0.00600794
ENSMUSG00000047787	Flrt1	22.3145	74.0559	258.773	180.903	48.1852	219.838	-4.5541	-2.18717	1.615e-06	0.000268016
ENSMUSG00000031451	Gas6	4125.13	4452.13	23180.6	16006.8	4288.63	19593.7	-4.56878	-2.19181	2.17624e-29	5.29697e-26
ENSMUSG00000039628	Hs3st6	16.2287	7.79536	57.3971	52.4207	12.012	54.9089	-4.58277	-2.19622	0.000900011	0.0423992
ENSMUSG00000031972	Acta1	459.475	319.61	1300.68	2285.95	389.542	1793.32	-4.60426	-2.20297	1.6314e-16	1.83269e-13
ENSMUSG00000003469	Phyhip	28.4002	33.1303	183.865	115.12	30.7653	149.493	-4.85943	-2.28079	1.77431e-07	4.24788e-05
ENSMUSG00000038156	Spon1	1459.57	1140.07	6904.19	5787.86	1299.82	6346.03	-4.88288	-2.28773	4.37177e-34	2.12818e-30
ENSMUSG00000032661	Oas3	19.2716	31.1814	57.3971	202.488	25.2265	129.942	-5.1412	-2.3621	3.69011e-05	0.00382202
ENSMUSG00000040264	Gbp2b	21.3002	12.6675	134.251	48.3093	16.9838	91.28	-5.38741	-2.42959	6.72351e-05	0.00609877
ENSMUSG00000021798	Ldb3	150.116	188.063	963.103	898.347	169.089	930.725	-5.50191	-2.45993	2.12755e-27	4.43867e-24
ENSMUSG00000048485	Zbtb8b	5.07147	6.82094	39.8861	38.0307	5.94621	38.9584	-6.54383	-2.71013	0.000760984	0.0375453
ENSMUSG00000032373	Car12	14.2001	6.82094	63.234	76.0614	10.5105	69.6477	-6.644	-2.73205	1.53223e-05	0.00188039
ENSMUSG00000051048	P4ha3	8.11435	2.92326	38.9133	37.0029	5.51881	37.9581	-6.90648	-2.78795	0.000959922	0.0443551
ENSMUSG00000049112	Oxtr	1371.33	1659.44	12847.2	8292.75	1515.38	10570	-6.97492	-2.80218	5.66093e-39	8.26723e-35
ENSMUSG00000056328	Myh1	16.2287	7.79536	16.5381	153.151	12.012	84.8444	-7.06851	-2.82141	0.000435546	0.0247499
ENSMUSG00000078117	Gm16485	5.07147	13.6419	78.7994	59.6157	9.35668	69.2075	-7.37092	-2.88185	1.22512e-05	0.00154238
ENSMUSG00000040152	Thbs1	1550.86	826.308	10213.8	7330.68	1188.58	8772.22	-7.38076	-2.88377	7.28786e-09	2.36515e-06
ENSMUSG00000044217	Aqp5	7.10006	20.4628	149.816	78.1172	13.7814	113.967	-8.24457	-3.04345	1.54569e-07	3.82597e-05
ENSMUSG00000031870	Pgr	29.4145	47.7466	404.698	249.769	38.5806	327.234	-8.47153	-3.08262	1.06922e-16	1.30124e-13
ENSMUSG00000000120	Ngfr	91.2865	73.0815	909.597	619.798	82.184	764.698	-9.31264	-3.21919	3.44668e-31	1.25838e-27
ENSMUSG00000078612	Fyb2	6.08576	4.8721	70.0439	41.1143	5.47893	55.5791	-10.1623	-3.34516	1.0092e-05	0.00129283
ENSMUSG00000032726	Bmp8a	2.02859	3.89768	39.8861	25.6964	2.96313	32.7913	-11.035	-3.46401	0.000429514	0.0246954
ENSMUSG00000034009	Rxfp1	4.05718	6.82094	66.1525	56.5322	5.43906	61.3423	-11.2494	-3.49178	1.53962e-06	0.000261449
ENSMUSG00000036523	Greb1	2.02859	15.5907	122.577	89.4236	8.80966	106	-11.9528	-3.57927	2.52743e-08	8.02404e-06
ENSMUSG00000055489	Ano5	1.01429	6.82094	36.9676	64.755	3.91762	50.8613	-12.8739	-3.68638	2.11751e-05	0.00242413
ENSMUSG00000093861	Igkv1-110	4.05718	4.8721	126.468	11.3064	4.46464	68.8873	-15.4336	-3.948	2.78081e-05	0.0029861
ENSMUSG00000030854	Ptpn5	21.3002	17.5396	412.481	194.265	19.4199	303.373	-15.6427	-3.96741	1.24434e-19	1.81723e-16
ENSMUSG00000110439	Mup22	59.8433	116.93	2026.41	743.141	88.3869	1384.77	-15.6641	-3.96939	8.72462e-07	0.000176964
ENSMUSG00000086962	Gm12248	9.12865	5.84652	113.821	126.426	7.48758	120.124	-16.0838	-4.00753	2.74626e-12	1.6711e-09
ENSMUSG00000066677	Ifi208	2.02859	11.693	149.816	91.4793	6.86082	120.648	-17.4576	-4.12578	9.05782e-11	4.0085e-08
ENSMUSG00000090015	Gm15446	1.01429	2.92326	154.68	93.535	1.96878	124.108	-62.5638	-5.96726	4.29453e-12	2.2399e-09
ENSMUSG00000052117	D630039A03Rik	1.01429	2.92326	155.653	96.6186	1.96878	126.136	-63.5828	-5.99056	2.98192e-12	1.67492e-09
ENSMUSG00000039533	Mmd2	8.11435	7.79536	658.607	385.446	7.95486	522.027	-65.6633	-6.03702	1.37724e-37	1.00566e-33
ENSMUSG00000025955	Akr1cl	1.01429	0	31.1306	46.2536	0.507147	38.6921	-77.7093	-6.28002	0.000112936	0.00916284
ENSMUSG00000030730	Atp2a1	1.01429	0.97442	6.80982	563.266	0.994357	285.038	-286.66	-8.1632	6.70871e-10	2.57826e-07
ENSMUSG00000057003	Myh4	0	0	0	705.11	0	352.555	-1.26706e+07	-23.595	8.18163e-07	0.000170692

## Sheet: DEGs OS vs CS
gene_id	gene_name	OS1	OS2	CS1	CS2	OS	CS	FC	log2FoldChange	pvalue	padj
ENSMUSG00000064361	mt-Tr	74.3198	2.27816	0.899717	0	38.299	0.449858	86.397	6.43291	0.000939044	0.00789274
ENSMUSG00000017588	Krt27	0	70.6229	0.899717	0.869371	35.3115	0.884544	39.9105	5.3187	0.00369378	0.0237911
ENSMUSG00000076615	Ighg3	37.7145	91.1264	3.59887	0	64.4205	1.79943	36.1889	5.17747	8.36142e-07	2.03517e-05
ENSMUSG00000002341	Ncan	28.8405	100.239	1.79943	2.60811	64.5398	2.20377	29.2177	4.86877	1.0286e-06	2.44008e-05
ENSMUSG00000050276	Mrgprg	122.018	41.0069	8.09745	0.869371	81.5122	4.48341	18.2901	4.19299	3.35702e-06	6.75398e-05
ENSMUSG00000103149	AA914427	124.236	750.654	35.089	16.5181	437.445	25.8035	16.9571	4.08381	0.000862129	0.00741888
ENSMUSG00000042417	Ccno	15.5295	55.8149	3.59887	2.60811	35.6722	3.10349	11.5011	3.5237	0.000755432	0.00662994
ENSMUSG00000046794	Ppp1r3b	717.685	5001.7	317.6	184.307	2859.69	250.953	11.3954	3.51038	0.00440712	0.0272874
ENSMUSG00000064360	mt-Nd3	603.432	182.253	41.387	39.1217	392.843	40.2543	9.7615	3.2871	1.03482e-10	6.85309e-09
ENSMUSG00000082884	Gm13339	62.118	56.954	8.99717	3.47748	59.536	6.23733	9.57795	3.25972	8.76994e-06	0.000153007
ENSMUSG00000025202	Scd3	44.37	149.219	18.8941	1.73874	96.7947	10.3164	9.40747	3.23381	0.000320525	0.00327195
ENSMUSG00000105837	Gm35986	11.0925	62.6494	7.19774	0.869371	36.8709	4.03355	9.17227	3.19728	0.00654216	0.0373227
ENSMUSG00000044724	Gpr152	24.4035	30.7552	0	6.0856	27.5793	3.0428	9.00859	3.1713	0.00859752	0.0463492
ENSMUSG00000006784	Odad4	61.0088	316.664	24.2924	18.2568	188.836	21.2746	8.87755	3.15016	3.80834e-06	7.52857e-05
ENSMUSG00000024526	Cidea	1134.76	1955.8	119.662	230.383	1545.28	175.023	8.82453	3.14152	8.12856e-20	2.87101e-17
ENSMUSG00000100774	Gm7329	18.8573	75.1793	7.19774	4.34686	47.0183	5.7723	8.15217	3.02718	0.00103399	0.00854951
ENSMUSG00000041220	Elovl6	14954.9	39963.5	5093.3	1677.89	27459.2	3385.59	8.11058	3.01981	0.00206427	0.0150227
ENSMUSG00000064365	mt-Ts2	83.1938	80.8747	15.2952	5.21623	82.0342	10.2557	8.02374	3.00427	3.23648e-06	6.5613e-05
ENSMUSG00000093812	Gm5627	35.496	108.213	7.19774	11.3018	71.8543	9.24978	7.75567	2.95525	8.73933e-05	0.00107928
ENSMUSG00000032418	Me1	31107.8	105150	12546.6	5762.19	68128.7	9154.37	7.44216	2.89572	0.00227352	0.0162772
ENSMUSG00000037686	Aspg	449.247	1133.38	117.863	96.5002	791.315	107.182	7.38342	2.88429	4.49222e-13	4.60641e-11
ENSMUSG00000052629	Gm9885	25.5128	26.1988	3.59887	3.47748	25.8558	3.53818	7.30844	2.86956	0.00336932	0.0221381
ENSMUSG00000026567	Adcy10	106.488	316.664	38.6878	20.8649	211.576	29.7764	7.11025	2.8299	6.15623e-07	1.5656e-05
ENSMUSG00000045620	Odf3l1	112.034	290.465	32.3898	24.3424	201.25	28.3661	7.09649	2.82711	6.56049e-08	2.21385e-06
ENSMUSG00000042041	2010003K11Rik	257.346	770.018	80.9745	65.2028	513.682	73.0887	7.02862	2.81324	1.04804e-09	5.60858e-08
ENSMUSG00000018126	Baiap2l2	105.379	167.445	16.1949	22.6037	136.412	19.3993	7.02332	2.81215	1.18958e-08	5.00191e-07
ENSMUSG00000094694	Ighv1-9	24.4035	30.7552	4.49858	3.47748	27.5793	3.98803	6.9207	2.79092	0.00320903	0.0213497
ENSMUSG00000110755	BC049987	14.4203	39.8678	5.3983	2.60811	27.144	4.00321	6.79112	2.76365	0.00829716	0.0452868
ENSMUSG00000070692	Rps12-ps10	32.1683	27.3379	3.59887	5.21623	29.7531	4.40755	6.74247	2.75328	0.00248863	0.0173941
ENSMUSG00000087429	Gm16235	28.8405	38.7287	1.79943	8.69371	33.7846	5.24657	6.41401	2.68123	0.00479526	0.0291791
ENSMUSG00000035355	Kcnh4	22.185	27.3379	4.49858	3.47748	24.7615	3.98803	6.21341	2.63539	0.00693348	0.0391616
ENSMUSG00000091996	BC049352	29.9498	21.6425	2.69915	6.0856	25.7961	4.39237	5.85994	2.55088	0.00924325	0.0492168
ENSMUSG00000047511	Olfr1396	37.7145	29.6161	7.19774	4.34686	33.6653	5.7723	5.84268	2.54663	0.00265065	0.0183316
ENSMUSG00000085151	1110018N20Rik	57.681	95.6827	17.9943	8.69371	76.6819	13.344	5.75525	2.52488	7.19163e-05	0.000910062
ENSMUSG00000045318	Adra2c	34.3868	20.5034	3.59887	6.0856	27.4451	4.84223	5.66093	2.50104	0.00816844	0.0446609
ENSMUSG00000083863	Gm13341	33.2775	51.2586	8.09745	6.95497	42.2681	7.52621	5.61695	2.48979	0.00105835	0.00871852
ENSMUSG00000059146	Ntrk3	1042.7	1332.72	230.328	195.609	1187.71	212.968	5.57781	2.4797	4.06146e-28	4.03455e-25
ENSMUSG00000022686	B3gnt5	38.8238	34.1724	6.29802	6.95497	36.4981	6.62649	5.50669	2.46119	0.00184391	0.013705
ENSMUSG00000038522	Mfsd4b1	86.5216	103.656	14.3955	20.8649	95.0889	17.6302	5.38711	2.42951	2.85001e-06	5.86003e-05
ENSMUSG00000003528	Slc25a1	11934.4	38433.7	5865.25	3589.63	25184.1	4727.44	5.32719	2.41337	0.00382812	0.0244747
ENSMUSG00000053214	Gm9899	116.471	152.637	37.7881	13.0406	134.554	25.4143	5.30351	2.40695	1.26535e-05	0.000209564
ENSMUSG00000027605	Acss2	6019.9	15199.9	2825.11	1187.56	10609.9	2006.34	5.28821	2.40278	0.00508353	0.0305655
ENSMUSG00000052396	Mogat2	28.8405	190.226	20.6935	21.7343	109.533	21.2139	5.16109	2.36767	0.00227646	0.0162875
ENSMUSG00000027533	Fabp5	2817.5	9019.23	1330.68	965.002	5918.37	1147.84	5.15608	2.36627	0.00271841	0.0186879
ENSMUSG00000021509	Slc25a48	52.1348	167.445	27.8912	14.7793	109.79	21.3353	5.14901	2.3643	0.000355723	0.00355813
ENSMUSG00000087478	4930506C21Rik	44.37	82.0137	9.89689	14.7793	63.1919	12.3381	5.11448	2.35459	0.00037407	0.00370131
ENSMUSG00000051596	Otop1	472.541	626.494	79.1751	136.491	549.517	107.833	5.09203	2.34824	4.41131e-13	4.55282e-11
ENSMUSG00000046844	Vat1l	222.959	202.756	32.3898	51.2929	212.858	41.8414	5.08214	2.34544	6.5336e-10	3.69555e-08
ENSMUSG00000042532	Golga7b	22.185	79.7356	9.89689	10.4325	50.9603	10.1647	5.01003	2.32482	0.00446231	0.0275433
ENSMUSG00000069917	Hba-a2	273.985	338.307	78.2754	46.0767	306.146	62.176	4.92809	2.30103	1.16025e-10	7.55776e-09
ENSMUSG00000045294	Insig1	5041.54	8879.13	1425.15	1448.37	6960.34	1436.76	4.84435	2.2763	4.82162e-19	1.41916e-16
ENSMUSG00000079550	Mpp4	58.7903	59.2321	11.6963	13.0406	59.0112	12.3684	4.76954	2.25385	0.000234204	0.00251346
ENSMUSG00000066175	2510046G10Rik	41.0423	42.146	6.29802	11.3018	41.5941	8.79992	4.71891	2.23845	0.00262528	0.0182051
ENSMUSG00000022129	Dct	21.0758	56.954	9.89689	6.95497	39.0149	8.42593	4.63148	2.21147	0.00881847	0.0473458
ENSMUSG00000076613	Ighg2b	78.7568	124.16	18.8941	25.2118	101.458	22.0529	4.59617	2.20043	2.08149e-05	0.000318889
ENSMUSG00000100862	Gm10925	3816.93	3694.04	914.112	736.357	3755.48	825.235	4.55141	2.18631	2.37994e-35	4.72835e-32
ENSMUSG00000064358	mt-Co3	5091.46	4652	1076.06	1065.85	4871.73	1070.96	4.54904	2.18556	3.47776e-47	2.76378e-43
ENSMUSG00000042010	Acacb	6017.69	12438.8	2442.73	1632.68	9228.22	2037.71	4.52875	2.17911	0.000160988	0.00183029
ENSMUSG00000094420	Igkv10-96	51.0255	59.2321	13.4958	11.3018	55.1288	12.3988	4.44799	2.15315	0.000628259	0.00569951
ENSMUSG00000031906	Smpd3	701.047	348.558	119.662	121.712	524.802	120.687	4.34909	2.12071	2.37641e-09	1.19527e-07
ENSMUSG00000027327	1700037H04Rik	1995.54	4497.09	811.545	688.542	3246.31	750.043	4.32816	2.11375	0.000191496	0.00211805
ENSMUSG00000064357	mt-Atp6	5934.49	3238.4	1462.94	658.114	4586.45	1060.53	4.3248	2.11263	0.00224986	0.0161296
ENSMUSG00000022707	Gbe1	2967.25	5467.58	1176.83	782.434	4217.41	979.632	4.30516	2.10607	4.41142e-05	0.000598251
ENSMUSG00000101249	Gm29216	2340.52	2111.85	439.962	598.127	2226.19	519.044	4.28819	2.10037	4.64381e-24	2.38093e-21
ENSMUSG00000049265	Kcnk3	1609.52	2536.73	538.031	429.469	2073.13	483.75	4.28578	2.09956	2.26262e-16	4.33277e-14
ENSMUSG00000095588	Gm12350	55.4625	38.7287	11.6963	10.4325	47.0956	11.0644	4.25903	2.09053	0.0022623	0.0162041
ENSMUSG00000048355	Arxes1	445.919	570.679	99.8686	141.708	508.299	120.788	4.20565	2.07233	7.78694e-13	7.50095e-11
ENSMUSG00000020052	Ascl1	44.37	118.464	21.5932	17.3874	81.4172	19.4903	4.17704	2.06248	0.00130988	0.0103373
ENSMUSG00000112449	Srp54b	322.792	250.598	29.6907	107.802	286.695	68.7463	4.16658	2.05886	6.24291e-05	0.00080802
ENSMUSG00000021069	Pygl	5933.38	12239.4	2641.57	1851.76	9086.4	2246.66	4.0444	2.01593	0.000323399	0.00329705
ENSMUSG00000103922	Gm6123	97.6141	173.14	32.3898	34.7748	135.377	33.5823	4.02934	2.01054	1.7259e-05	0.000273494
ENSMUSG00000053977	Cd8a	59.8995	111.63	29.6907	13.0406	85.7647	21.3656	4.01852	2.00666	0.00118543	0.0095592
ENSMUSG00000049233	Apoo-ps	56.5718	43.285	18.8941	6.0856	49.9284	12.4898	4.00674	2.00243	0.00728477	0.0407544
ENSMUSG00000073940	Hbb-bt	279.531	456.771	100.768	83.4596	368.151	92.114	3.997	1.99892	3.53101e-09	1.69042e-07
ENSMUSG00000023861	Mpc1	1004.98	2168.81	374.282	424.253	1586.89	399.268	3.97406	1.99061	1.12159e-09	5.94216e-08
ENSMUSG00000104213	Ighd	63.2273	45.5632	13.4958	13.9099	54.3952	13.7028	3.97036	1.98927	0.00161089	0.0123153
ENSMUSG00000020532	Acaca	33722.3	70118.3	17688.4	8613.73	51920.3	13151.1	3.94798	1.98111	0.00523209	0.031298
ENSMUSG00000025153	Fasn	231922	473807	119528	59508.5	352865	89518.4	3.9418	1.97885	0.00422318	0.0264235
ENSMUSG00000052305	Hbb-bs	2485.83	4140.55	983.391	700.713	3313.19	842.052	3.93487	1.97632	4.39357e-13	4.55282e-11
ENSMUSG00000056486	Chn1	419.297	901.012	193.439	148.662	660.154	171.051	3.85957	1.94844	9.31879e-08	3.0106e-06
ENSMUSG00000052392	Acot4	258.455	535.367	76.4759	129.536	396.911	103.006	3.85092	1.9452	2.55491e-06	5.34312e-05
ENSMUSG00000048040	Arxes2	2093.16	1851	438.162	589.434	1972.08	513.798	3.83756	1.94019	1.79627e-20	7.32051e-18
ENSMUSG00000083836	Ldha-ps2	68.7735	77.4574	25.1921	13.0406	73.1155	19.1163	3.82992	1.93732	0.000820713	0.0071281
ENSMUSG00000023019	Gpd1	16064.2	34523.2	7557.62	5655.26	25293.7	6606.44	3.82864	1.93683	0.000618149	0.00561975
ENSMUSG00000062609	Kcnj15	179.699	399.817	92.6708	59.1172	289.758	75.894	3.81882	1.93313	1.28596e-05	0.000212464
ENSMUSG00000085069	Prdm16os	97.6141	94.5436	30.5904	19.9955	96.0788	25.293	3.80248	1.92694	8.75877e-05	0.00108
ENSMUSG00000049422	Chchd10	1271.2	2638.11	597.412	435.555	1954.66	516.484	3.78468	1.92017	3.62897e-09	1.7321e-07
ENSMUSG00000058022	Adtrp	211.867	283.631	39.5875	91.284	247.749	65.4358	3.78214	1.9192	1.06493e-05	0.000180834
ENSMUSG00000091498	Mpc1-ps	2671.08	4999.42	995.987	1039.77	3835.25	1017.88	3.76773	1.9137	3.44838e-12	2.9467e-10
ENSMUSG00000020059	Sycp3	138.656	178.836	40.4873	44.3379	158.746	42.4126	3.74146	1.9036	1.05918e-06	2.50514e-05
ENSMUSG00000018796	Acsl1	41167.6	48580.6	9670.16	14672.4	44874.1	12171.3	3.68684	1.88239	1.09675e-17	2.56348e-15
ENSMUSG00000045102	Poln	117.581	255.154	37.7881	64.3335	186.367	51.0608	3.64659	1.86655	0.000136615	0.00158842
ENSMUSG00000083563	Gm13340	647.802	386.148	164.648	119.104	516.975	141.876	3.64554	1.86613	1.48824e-08	6.11218e-07
ENSMUSG00000078496	Zfp982	127.564	108.213	39.5875	25.2118	117.888	32.3997	3.64243	1.8649	4.58461e-05	0.000619098
ENSMUSG00000111942	Gm5182	3965.57	8052.15	2185.41	1114.53	6008.86	1649.97	3.64182	1.86466	0.00591831	0.034431
ENSMUSG00000057715	A830018L16Rik	169.715	192.504	38.6878	60.856	181.11	49.7719	3.63538	1.86211	1.73879e-06	3.87605e-05
ENSMUSG00000100131	Gm28439	1284.51	1016.06	326.597	313.843	1150.29	320.22	3.59259	1.84502	1.8308e-18	5.19621e-16
ENSMUSG00000021760	Gpx8	2053.22	2464.97	641.498	616.384	2259.1	628.941	3.59187	1.84473	1.15187e-24	7.04146e-22
ENSMUSG00000007480	Mc5r	96.5048	96.8218	35.9887	18.2568	96.6633	27.1227	3.56859	1.83536	0.000397034	0.00388575
ENSMUSG00000059040	Eno1b	246.254	605.99	129.559	109.541	426.122	119.55	3.56417	1.83357	9.23708e-06	0.00015983
ENSMUSG00000021748	Pdhb	8351.55	13359.1	3723.03	2377.73	10855.3	3050.38	3.55876	1.83137	1.84169e-11	1.4349e-09
ENSMUSG00000030244	Gys2	525.785	1149.33	291.508	180.829	837.558	236.169	3.54685	1.82654	1.31498e-06	3.00292e-05
ENSMUSG00000060445	Sycp2	43.2608	56.954	17.9943	10.4325	50.1074	14.2134	3.52894	1.81924	0.00613057	0.0354583
ENSMUSG00000101111	Gm28437	2129.76	2029.84	662.192	525.97	2079.8	594.081	3.50149	1.80797	1.06646e-21	4.58116e-19
ENSMUSG00000108207	1810059H22Rik	77.6476	67.2057	17.0946	24.3424	72.4266	20.7185	3.49328	1.80458	0.000912593	0.00773174
ENSMUSG00000067736	Gm10222	327.229	439.685	108.866	111.28	383.457	110.073	3.48301	1.80033	3.40132e-10	2.05553e-08
ENSMUSG00000115819	Gm9108	65.4458	67.2057	21.5932	16.5181	66.3258	19.0556	3.48282	1.80026	0.00121275	0.00975477
ENSMUSG00000023832	Acat2	1525.22	3076.65	773.757	547.704	2300.94	660.73	3.48245	1.8001	0.000924701	0.00779692
ENSMUSG00000022435	Upk3a	251.8	125.299	22.4929	86.0678	188.549	54.2803	3.47098	1.79534	0.00278617	0.0190795
ENSMUSG00000002997	Prkar2b	13713.7	15549.6	3545.78	4903.25	14631.6	4224.52	3.46338	1.79218	7.89442e-20	2.85168e-17
ENSMUSG00000025270	Alas2	120.908	232.372	61.1808	40.8604	176.64	51.0206	3.4631	1.79206	8.8411e-05	0.00108762
ENSMUSG00000067235	H2-Q10	2312.79	3363.7	850.233	799.822	2838.25	825.027	3.44012	1.78246	3.17172e-16	5.93075e-14
ENSMUSG00000069919	Hba-a1	1332.21	2523.06	637.899	485.979	1927.64	561.939	3.43042	1.77839	3.43913e-09	1.66072e-07
ENSMUSG00000000632	Sez6	68.7735	48.9804	17.9943	16.5181	58.877	17.2562	3.41356	1.77128	0.00293811	0.0199055
ENSMUSG00000042401	Crtac1	37.7145	107.073	19.7938	22.6037	72.394	21.1987	3.41257	1.77086	0.00726832	0.0407057
ENSMUSG00000049892	Rasd1	1656.11	3307.89	781.854	672.893	2482	727.374	3.41224	1.77072	3.43855e-09	1.66072e-07
ENSMUSG00000021057	Akap5	58.7903	46.7023	17.0946	13.9099	52.7463	15.5023	3.40483	1.76758	0.00435029	0.0270197
ENSMUSG00000029716	Tfr2	108.707	66.0666	28.7909	22.6037	87.3866	25.6973	3.40342	1.76699	0.000832829	0.00720576
ENSMUSG00000029368	Alb	921.787	1041.12	263.617	324.275	981.453	293.946	3.33796	1.73897	4.10661e-16	7.41709e-14
ENSMUSG00000056648	Hoxb8	134.219	121.882	37.7881	39.1217	128.05	38.4549	3.32988	1.73547	1.85375e-05	0.000290566
ENSMUSG00000026922	Agpat2	8862.91	16657.9	4039.73	3760.03	12760.4	3899.88	3.27198	1.71016	1.79648e-10	1.12414e-08
ENSMUSG00000037624	Kcnk2	556.844	559.288	170.946	172.136	558.066	171.541	3.25321	1.70186	3.01366e-14	3.83193e-12
ENSMUSG00000021414	Fam217a	57.681	66.0666	20.6935	17.3874	61.8738	19.0405	3.25055	1.70069	0.00265946	0.0183701
ENSMUSG00000064354	mt-Co2	3844.66	6553.13	1782.34	1435.33	5198.89	1608.84	3.23149	1.6922	6.14702e-11	4.304e-09
ENSMUSG00000005950	P2rx5	246.254	400.956	117.863	82.5903	323.605	100.227	3.22947	1.6913	2.23977e-06	4.79125e-05
ENSMUSG00000005057	Sh2b2	1002.76	1890.87	446.26	452.073	1446.82	449.166	3.22085	1.68744	8.42091e-09	3.67698e-07
ENSMUSG00000040283	Btnl9	3771.45	3467.36	1206.52	1046.72	3619.41	1126.62	3.21289	1.68387	2.21556e-24	1.21428e-21
ENSMUSG00000063524	Eno1	14430.2	29642.3	7727.67	6024.74	22036.3	6876.21	3.20471	1.68019	0.00148728	0.0115031
ENSMUSG00000033610	Pank1	336.103	605.99	134.058	159.964	471.047	147.011	3.20308	1.67946	5.46973e-07	1.40219e-05
ENSMUSG00000042251	Pm20d1	144.203	169.723	45.8856	52.1623	156.963	49.0239	3.20049	1.67829	7.84031e-06	0.000140016
ENSMUSG00000032911	Cspg4	1122.56	2667.72	662.192	525.1	1895.14	593.646	3.19237	1.67463	0.00598575	0.0347725
ENSMUSG00000047696	Ccdc144b	68.7735	88.8482	19.7938	29.5586	78.8109	24.6762	3.19051	1.67379	0.00156228	0.0120072
ENSMUSG00000032311	Nrg4	1496.38	3147.28	574.919	884.151	2321.83	729.535	3.18248	1.67015	0.00503471	0.0302998
ENSMUSG00000030889	Vwa3a	441.482	236.929	102.568	111.28	339.205	106.924	3.17282	1.66577	4.07275e-06	7.94261e-05
ENSMUSG00000022383	Ppara	257.346	244.902	68.3785	90.4146	251.124	79.3965	3.1614	1.66056	1.75985e-07	5.17024e-06
ENSMUSG00000097245	Gm5421	52.1348	112.769	28.7909	23.473	82.4518	26.132	3.1549	1.6576	0.00418459	0.0262263
ENSMUSG00000058258	Idi1	508.037	620.798	216.832	141.708	564.418	179.27	3.14958	1.65516	6.86703e-09	3.04873e-07
ENSMUSG00000044083	Efcab8	65.4458	50.1195	15.2952	21.7343	57.7827	18.5147	3.11918	1.64117	0.00602056	0.0349364
ENSMUSG00000024747	Aldh1a7	2521.33	3449.13	1094.06	821.556	2985.23	957.806	3.11692	1.64012	5.02844e-13	5.05836e-11
ENSMUSG00000054434	Tmem120b	1406.53	3203.09	798.049	681.587	2304.81	739.818	3.11535	1.6394	0.00415036	0.0260591
ENSMUSG00000025792	Slc25a10	6986.06	11515	3041.04	2902.83	9250.51	2971.94	3.11259	1.63811	4.69569e-12	3.86701e-10
ENSMUSG00000027983	Cyp2u1	177.48	173.14	51.2839	61.7254	175.31	56.5046	3.10145	1.63294	3.98991e-06	7.83877e-05
ENSMUSG00000026568	Mpc2	3336.63	7528.18	1931.69	1573.56	5432.4	1752.63	3.09957	1.63207	0.00453754	0.0279101
ENSMUSG00000025175	Fn3k	82.0846	132.133	44.0861	25.2118	107.109	34.6489	3.09318	1.62909	0.00143792	0.0111797
ENSMUSG00000000168	Dlat	3822.48	7281	1892.1	1705.71	5551.74	1798.91	3.08614	1.6258	4.22367e-09	1.98027e-07
ENSMUSG00000022747	St3gal6	1575.14	1393.09	448.059	515.537	1484.12	481.798	3.0801	1.62298	7.7074e-18	1.85608e-15
ENSMUSG00000020593	Lpin1	5238.99	8143.28	2097.24	2250.8	6691.14	2174.02	3.07768	1.62184	5.84295e-13	5.84075e-11
ENSMUSG00000026827	Gpd2	4004.4	6362.9	2013.57	1364.91	5183.65	1689.24	3.06872	1.61764	1.1319e-09	5.97687e-08
ENSMUSG00000032279	Idh3a	5940.04	6995.09	2144.03	2080.41	6467.56	2112.22	3.06196	1.61446	3.9645e-24	2.10039e-21
ENSMUSG00000027195	Hsd17b12	5498.56	7583.99	2231.3	2047.37	6541.27	2139.33	3.05761	1.61241	2.99806e-16	5.67276e-14
ENSMUSG00000116903	Gm19522	166.388	179.975	48.5847	65.2028	173.181	56.8938	3.04204	1.60504	1.14933e-05	0.000192288
ENSMUSG00000098188	Sowahc	2465.86	2857.95	822.341	931.966	2661.91	877.154	3.03441	1.60142	8.40068e-20	2.90262e-17
ENSMUSG00000034987	Hrh2	100.942	123.021	31.4901	42.5992	111.981	37.0446	3.02058	1.59483	0.000315483	0.00323605
ENSMUSG00000110613	Lncbate1	93.1771	161.749	34.1892	50.4235	127.463	42.3064	3.01012	1.58982	0.000813817	0.00709146
ENSMUSG00000018846	Pank3	13095.8	19026	5670.92	5032.79	16060.9	5351.85	3.001	1.58544	2.26312e-14	2.97272e-12
ENSMUSG00000066000	Zfp979	401.549	259.71	97.1694	124.32	330.629	110.745	2.98517	1.57781	2.06138e-06	4.48201e-05
ENSMUSG00000064193	Gm4735	68.7735	148.08	44.0861	28.6893	108.427	36.3877	2.98043	1.57552	0.0035999	0.0233253
ENSMUSG00000091989	Ndufab1-ps	512.474	674.335	186.241	212.127	593.405	199.184	2.97836	1.57452	3.81972e-10	2.28236e-08
ENSMUSG00000026527	Rgs7	601.214	493.222	212.333	156.487	547.218	184.41	2.96869	1.56983	3.24231e-09	1.58077e-07
ENSMUSG00000076609	Igkc	1131.44	1276.91	401.274	418.168	1204.17	409.721	2.93874	1.5552	9.28279e-17	1.89155e-14
ENSMUSG00000045776	Lrtm1	185.245	210.73	82.774	53.0316	197.987	67.9028	2.91758	1.54477	2.86241e-05	0.000418153
ENSMUSG00000022797	Tfrc	719.904	1466	333.795	415.559	1092.95	374.677	2.91652	1.54425	2.156e-06	4.64328e-05
ENSMUSG00000064345	mt-Nd2	116530	80057.9	34712	33430.8	98294	34071.4	2.88495	1.52855	3.33037e-14	4.16794e-12
ENSMUSG00000042379	Esm1	52.1348	62.6494	21.5932	18.2568	57.3921	19.925	2.88101	1.52657	0.00805126	0.0441112
ENSMUSG00000032401	Lctl	262.892	222.121	77.3757	91.284	242.506	84.3298	2.87518	1.52365	1.26863e-06	2.90962e-05
ENSMUSG00000100594	2810414N06Rik	122.018	138.968	40.4873	50.4235	130.493	45.4554	2.86923	1.52066	0.00015482	0.00177669
ENSMUSG00000032942	Ucp3	651.13	1059.34	300.505	301.672	855.237	301.089	2.84014	1.50596	3.62209e-08	1.3084e-06
ENSMUSG00000060002	Chpt1	25483.9	29417.9	8667.87	10708	27450.9	9687.96	2.83347	1.50257	3.3918e-18	9.13716e-16
ENSMUSG00000102070	Gm28661	3861.3	4397.99	1576.3	1344.92	4129.64	1460.61	2.82746	1.4995	1.95501e-18	5.4514e-16
ENSMUSG00000008153	Clstn3	887.401	1278.05	352.689	414.69	1082.72	383.69	2.82131	1.49637	8.21029e-10	4.51537e-08
ENSMUSG00000042616	Oscp1	225.178	628.772	182.643	120.843	426.975	151.743	2.8139	1.49257	0.000944681	0.00793592
ENSMUSG00000048142	Nat8l	4398.18	6922.19	2005.47	2018.68	5660.18	2012.07	2.81304	1.49213	5.70723e-11	4.03159e-09
ENSMUSG00000030671	Pde3b	10393.7	9078.47	2977.16	3976.5	9736.07	3476.83	2.80019	1.48552	7.55472e-15	1.1016e-12
ENSMUSG00000034981	Parm1	1963.37	3506.09	1068.86	885.889	2734.73	977.376	2.79802	1.48441	5.68376e-08	1.96386e-06
ENSMUSG00000059447	Hadhb	7438.64	7710.43	2501.21	2913.26	7574.53	2707.24	2.79777	1.48428	1.34817e-21	5.63888e-19
ENSMUSG00000086584	Gm12002	164.169	279.075	87.2725	71.2884	221.622	79.2805	2.79542	1.48307	0.000105409	0.00126539
ENSMUSG00000018169	Mfng	1405.42	2046.93	531.733	710.276	1726.17	621.004	2.77917	1.47465	2.81104e-09	1.38754e-07
ENSMUSG00000024827	Gldc	136.438	136.69	57.5819	40.8604	136.564	49.2212	2.77626	1.47314	0.000235118	0.00252157
ENSMUSG00000059027	9630013D21Rik	451.465	435.128	165.548	154.748	443.297	160.148	2.76841	1.46906	8.39006e-10	4.58253e-08
ENSMUSG00000037110	Ralgapa2	3489.7	4870.71	1455.74	1567.48	4180.2	1511.61	2.76527	1.46742	4.79854e-13	4.85783e-11
ENSMUSG00000034829	Nxnl1	74.3198	108.213	23.3926	42.5992	91.2662	32.9959	2.76267	1.46606	0.00526095	0.0314372
ENSMUSG00000107838	Gm45769	120.908	127.577	41.387	48.6848	124.243	45.0359	2.75771	1.46347	0.000263448	0.00277853
ENSMUSG00000031373	Car5b	5326.62	6255.83	2180.01	2029.98	5791.22	2105	2.75119	1.46005	1.8211e-19	5.676e-17
ENSMUSG00000003948	Mmd	11646	15979	4333.04	5743.07	13812.5	5038.05	2.74157	1.455	1.55696e-11	1.22507e-09
ENSMUSG00000024935	Slc1a1	63.2273	137.829	36.8884	36.5136	100.528	36.701	2.73798	1.45311	0.00617284	0.0356379
ENSMUSG00000039886	Tmem120a	4309.44	5501.76	1677.97	1906.53	4905.6	1792.25	2.73696	1.45258	4.75278e-15	7.40595e-13
ENSMUSG00000051225	Fam83a	187.463	321.22	84.5734	102.586	254.342	93.5796	2.71663	1.44182	9.16371e-05	0.00112123
ENSMUSG00000064225	Paqr9	1842.47	3059.57	955.499	851.984	2451.02	903.742	2.71203	1.43937	1.30655e-08	5.46483e-07
ENSMUSG00000083626	Gm4459	272.876	379.314	136.757	106.063	326.095	121.41	2.68632	1.42563	4.97707e-06	9.51932e-05
ENSMUSG00000020774	Aspa	912.913	1215.4	399.474	392.956	1064.16	396.215	2.6856	1.42524	7.79665e-11	5.3645e-09
ENSMUSG00000065947	mt-Nd4l	552.407	563.844	302.305	113.888	558.126	208.096	2.68319	1.42395	0.000351437	0.00352089
ENSMUSG00000032452	Clstn2	179.699	287.048	112.465	61.7254	233.373	87.095	2.68064	1.42258	0.000567492	0.00521673
ENSMUSG00000035226	Rims4	157.514	273.379	74.6765	86.0678	215.446	80.3721	2.67939	1.42191	0.000217453	0.00235436
ENSMUSG00000110344	Gm45716	718.795	869.118	303.205	290.37	793.956	296.787	2.67507	1.41958	3.34018e-11	2.48079e-09
ENSMUSG00000026672	Optn	1057.12	1175.53	430.065	405.127	1116.32	417.596	2.67326	1.4186	4.13088e-14	5.05048e-12
ENSMUSG00000040037	Negr1	884.073	1149.33	401.274	359.92	1016.7	380.597	2.67135	1.41757	1.12294e-10	7.40578e-09
ENSMUSG00000101939	Gm28438	590.121	649.275	256.419	210.388	619.698	233.404	2.65557	1.40902	8.30344e-10	4.55086e-08
ENSMUSG00000064368	mt-Nd6	35057.9	30218.6	12837.2	11833.9	32638.3	12335.5	2.6459	1.40376	4.15112e-20	1.60922e-17
ENSMUSG00000051116	Gm8121	269.548	246.041	64.7796	130.406	257.795	97.5927	2.63977	1.40041	0.00028503	0.00295516
ENSMUSG00000039956	Mrap	1866.87	3130.19	1100.35	793.736	2498.53	947.045	2.63831	1.39962	3.52831e-07	9.4728e-06
ENSMUSG00000031299	Pdha1	7966.64	14050.5	4656.04	3722.65	11008.6	4189.34	2.62776	1.39384	1.09423e-07	3.4645e-06
ENSMUSG00000022555	Dgat1	4908.43	6234.18	1969.48	2327.31	5571.31	2148.39	2.59311	1.37468	2.53065e-13	2.79321e-11
ENSMUSG00000063684	Hadhb-ps	2183.01	2190.45	795.35	891.105	2186.73	843.228	2.59308	1.37467	7.18356e-17	1.50231e-14
ENSMUSG00000030935	Acsm3	237.38	254.015	77.3757	112.149	245.697	94.7623	2.59125	1.37365	2.6129e-05	0.00038752
ENSMUSG00000021474	Sfxn1	4082.04	4772.74	1651.88	1765.69	4427.39	1708.79	2.59084	1.37342	3.74558e-17	7.93764e-15
ENSMUSG00000024228	Nudt12	879.636	932.906	347.291	353.834	906.271	350.562	2.58506	1.3702	6.89199e-13	6.76181e-11
ENSMUSG00000032387	Rbpms2	701.047	1000.11	287.909	371.222	850.579	329.565	2.5802	1.36749	1.34041e-07	4.14325e-06
ENSMUSG00000029449	Rhof	154.186	321.22	103.467	80.8515	237.703	92.1595	2.57916	1.3669	0.00105869	0.00871852
ENSMUSG00000073460	Pnldc1	82.0846	119.603	27.8912	50.4235	100.844	39.1574	2.57249	1.36316	0.00676439	0.038425
ENSMUSG00000020102	Slc16a7	1000.54	1082.13	360.786	449.465	1041.34	405.126	2.56983	1.36167	4.17024e-11	3.01281e-09
ENSMUSG00000067149	Jchain	265.111	443.102	141.256	134.753	354.106	138.004	2.56549	1.35924	3.26084e-05	0.000466917
ENSMUSG00000010914	Pdhx	869.653	1426.13	435.463	461.636	1147.89	448.55	2.5588	1.35547	2.92084e-07	8.0318e-06
ENSMUSG00000009097	Tbx1	99.8326	149.219	53.0833	44.3379	124.526	48.7106	2.55649	1.35416	0.00159683	0.0122324
ENSMUSG00000028607	Cpt2	3392.09	4056.26	1357.67	1559.65	3724.18	1458.66	2.55296	1.35217	2.0074e-14	2.68114e-12
ENSMUSG00000046275	Trarg1	4250.65	5318.36	1672.57	2083.01	4784.51	1877.79	2.54777	1.34923	3.73743e-12	3.17661e-10
ENSMUSG00000040370	Etfrf1	1124.78	1346.39	470.552	501.627	1235.59	486.09	2.5416	1.34574	3.94359e-12	3.31637e-10
ENSMUSG00000041737	Tmem45b	2309.46	1669.89	549.727	1018.03	1989.68	783.88	2.53797	1.34367	6.32276e-06	0.000116582
ENSMUSG00000102329	Gm10851	76.5383	100.239	28.7909	40.8604	88.3887	34.8257	2.53589	1.34249	0.00570425	0.0334798
ENSMUSG00000029167	Ppargc1a	281.75	260.849	96.2697	118.234	271.299	107.252	2.52884	1.33848	5.3181e-06	0.000100866
ENSMUSG00000028261	Ndufaf4	530.222	634.467	258.219	203.433	582.345	230.826	2.52332	1.33533	5.83615e-08	2.01214e-06
ENSMUSG00000064363	mt-Nd4	123370	89997.6	42751.8	42380.1	106684	42566	2.50632	1.32557	1.07312e-12	1.0033e-10
ENSMUSG00000029093	Sorcs2	386.019	582.07	244.723	141.708	484.045	193.215	2.50584	1.3253	0.000101274	0.0012185
ENSMUSG00000020264	Slc36a2	4490.25	4461.78	1678.87	1893.49	4476.01	1786.18	2.5058	1.32527	5.92633e-18	1.47177e-15
ENSMUSG00000019883	Echdc1	1019.4	1435.24	503.841	482.501	1227.32	493.171	2.48848	1.31527	5.93833e-09	2.67376e-07
ENSMUSG00000031349	Nsdhl	746.526	1280.33	501.142	313.843	1013.43	407.493	2.48721	1.31453	3.71173e-05	0.000519773
ENSMUSG00000018566	Slc2a4	3921.2	7110.14	2359.96	2076.06	5515.67	2218.01	2.48674	1.31426	7.48339e-07	1.85644e-05
ENSMUSG00000041707	Tmem273	153.077	94.5436	57.5819	42.5992	123.81	50.0905	2.47359	1.30661	0.00361578	0.023409
ENSMUSG00000021775	Nr1d2	1688.28	2635.83	622.604	1127.57	2162.06	875.089	2.47031	1.30469	2.24822e-05	0.000341945
ENSMUSG00000039166	Akap7	896.275	1028.59	391.377	389.478	962.432	390.428	2.46494	1.30155	2.47579e-11	1.88278e-09
ENSMUSG00000025937	Lactb2	1383.24	1976.3	750.364	613.776	1679.77	682.07	2.46281	1.30031	2.23383e-08	8.61758e-07
ENSMUSG00000064370	mt-Cytb	221363	198466	87491.2	83240.6	209915	85365.9	2.459	1.29807	4.84749e-20	1.83443e-17
ENSMUSG00000022099	Dmtn	711.03	993.278	333.795	361.658	852.154	347.727	2.45022	1.29291	5.87975e-08	2.02279e-06
ENSMUSG00000064341	mt-Nd1	123514	123322	53705	47124.3	123418	50414.6	2.44807	1.29164	2.59606e-19	7.78524e-17
ENSMUSG00000039629	Strip2	429.28	612.825	220.431	206.041	521.052	213.236	2.44335	1.28886	1.3676e-06	3.11412e-05
ENSMUSG00000001588	Acap1	116.471	101.378	50.3841	39.1217	108.925	44.7529	2.43532	1.28411	0.00255701	0.0177861
ENSMUSG00000042293	Gm5617	337.212	385.009	163.748	133.014	361.111	148.381	2.43418	1.28343	1.97248e-06	4.30641e-05
ENSMUSG00000020664	Dld	5039.33	6092.94	2444.53	2143	5566.13	2293.77	2.42666	1.27897	1.74265e-13	1.9784e-11
ENSMUSG00000089783	Gm454	502.491	447.658	156.551	235.6	475.074	196.075	2.42207	1.27624	5.62187e-06	0.000105744
ENSMUSG00000025420	Katnal2	88.7401	123.021	39.5875	47.8154	105.88	43.7015	2.42139	1.27584	0.00395996	0.0250625
ENSMUSG00000025981	Coq10b	482.524	814.442	261.818	274.721	648.483	268.269	2.41685	1.27313	1.26577e-05	0.000209564
ENSMUSG00000030406	Gipr	169.715	130.994	54.8827	69.5497	150.355	62.2162	2.41617	1.27272	0.000881794	0.00754318
ENSMUSG00000043122	A530016L24Rik	3471.95	5247.74	1834.52	1776.99	4359.85	1805.76	2.41435	1.27164	7.19287e-09	3.17565e-07
ENSMUSG00000087305	A430035B10Rik	118.69	97.9609	49.4844	40.8604	108.325	45.1724	2.39927	1.26259	0.00295488	0.0200106
ENSMUSG00000074109	Mrgprx2	79.8661	87.7091	35.089	34.7748	83.7876	34.9319	2.39843	1.26209	0.00643283	0.0368179
ENSMUSG00000001657	Hoxc8	1084.85	1248.43	448.059	525.1	1166.64	486.58	2.39721	1.26136	1.95977e-10	1.21674e-08
ENSMUSG00000042429	Adora1	876.308	1340.7	417.469	507.713	1108.5	462.591	2.39584	1.26053	9.433e-07	2.25795e-05
ENSMUSG00000074796	Slc4a11	138.656	135.55	41.387	73.0272	137.103	57.2071	2.39472	1.25985	0.00308881	0.0207085
ENSMUSG00000055866	Per2	358.288	768.879	181.743	289.501	563.583	235.622	2.39108	1.25766	0.00106204	0.00873515
ENSMUSG00000063253	Scoc	1049.35	1074.15	465.154	423.384	1061.75	444.269	2.39009	1.25706	1.02212e-11	8.20481e-10
ENSMUSG00000001891	Ugp2	2546.84	3618.86	1445.85	1134.53	3082.85	1290.19	2.38951	1.25672	2.8008e-08	1.03285e-06
ENSMUSG00000064351	mt-Co1	488282	443920	193044	197139	466101	195092	2.38914	1.25649	6.78172e-20	2.50671e-17
ENSMUSG00000089941	Gm16168	143.093	102.517	35.089	67.811	122.805	51.45	2.38536	1.25421	0.00831988	0.0453952
ENSMUSG00000030498	Gas2	117.581	166.306	50.3841	68.6803	141.943	59.5322	2.38262	1.25255	0.00213326	0.0154469
ENSMUSG00000027282	Mtch2	3847.99	4713.51	1668.08	1925.66	4280.75	1796.87	2.38219	1.25229	2.58226e-12	2.29287e-10
ENSMUSG00000003949	Hlf	360.507	896.456	264.517	264.289	628.481	264.403	2.37664	1.24892	0.00109928	0.0089779
ENSMUSG00000004748	Mtfp1	128.673	291.604	87.2725	89.5452	210.139	88.4089	2.3761	1.2486	0.00421109	0.0263612
ENSMUSG00000021273	Fdft1	896.275	1974.03	649.596	559.006	1435.15	604.301	2.3748	1.24781	0.00015948	0.00181574
ENSMUSG00000015568	Lpl	162258	197950	72163.6	79825.7	180104	75994.6	2.36996	1.24486	2.74989e-14	3.52474e-12
ENSMUSG00000028996	Rbp7	577.92	480.692	233.027	213.865	529.306	223.446	2.36932	1.24447	1.2855e-07	3.99838e-06
ENSMUSG00000042797	Aqp11	95.3956	117.325	44.0861	46.0767	106.36	45.0814	2.35868	1.23798	0.00338007	0.0221812
ENSMUSG00000038700	Hoxb5	73.2106	97.9609	38.6878	33.9055	85.5857	36.2967	2.35794	1.23753	0.00901543	0.0482639
ENSMUSG00000028494	Plin2	4927.29	8172.9	2826.91	2729.83	6550.09	2778.37	2.35749	1.23725	2.38997e-07	6.72322e-06
ENSMUSG00000011305	Plin5	198.556	331.472	128.66	96.5002	265.014	112.58	2.35416	1.23522	0.000653211	0.00588647
ENSMUSG00000030317	Timp4	1206.86	1380.56	490.346	608.56	1293.71	549.453	2.35411	1.23518	1.09105e-09	5.81919e-08
ENSMUSG00000038344	Txlng	1455.34	993.278	487.647	552.92	1224.31	520.283	2.3532	1.23462	2.26679e-07	6.44513e-06
ENSMUSG00000031767	Nudt7	1201.32	1951.24	687.384	654.637	1576.28	671.01	2.34898	1.23204	1.07374e-06	2.53205e-05
ENSMUSG00000041426	Hibch	2529.09	2692.78	1074.26	1149.31	2610.94	1111.79	2.34829	1.23161	5.61167e-15	8.49446e-13
ENSMUSG00000020321	Mdh1	9799.12	12106.1	4897.16	4445.1	10952.6	4671.13	2.34475	1.22944	4.54655e-13	4.63223e-11
ENSMUSG00000037577	Ephx3	86.5216	75.1793	35.089	33.9055	80.8504	34.4972	2.34414	1.22906	0.00906965	0.0484548
ENSMUSG00000024892	Pcx	25989.7	41854.3	16366.8	12640.7	33922	14503.7	2.33886	1.2258	4.72012e-07	1.23188e-05
ENSMUSG00000025597	Klhl4	170.825	227.816	87.2725	83.4596	199.32	85.3661	2.33457	1.22316	0.000284968	0.00295516
ENSMUSG00000064202	Spata6l	137.547	169.723	67.4788	64.3335	153.635	65.9061	2.33092	1.2209	0.00075017	0.00659469
ENSMUSG00000049303	Syt12	207.43	511.447	180.843	127.798	359.438	154.32	2.32914	1.2198	0.0041885	0.0262405
ENSMUSG00000035376	Hacd2	2697.7	3741.88	1389.16	1377.08	3219.79	1383.12	2.32783	1.21898	1.52671e-09	7.91063e-08
ENSMUSG00000024972	Lgals12	4634.45	4465.19	1782.34	2128.22	4549.82	1955.28	2.32683	1.21837	1.14393e-13	1.32713e-11
ENSMUSG00000020283	Pex13	2129.76	2165.39	892.519	954.57	2147.58	923.544	2.32525	1.21738	2.08532e-14	2.76201e-12
ENSMUSG00000049999	Ppp1r3d	366.053	534.228	186.241	201.694	450.141	193.968	2.32012	1.2142	1.42199e-05	0.000230389
ENSMUSG00000025503	Taldo1	6738.7	10940.9	4061.32	3561.81	8839.78	3811.57	2.31918	1.21362	2.93174e-07	8.04785e-06
ENSMUSG00000027684	Mecom	417.078	415.764	166.448	193	416.421	179.724	2.31652	1.21196	6.93763e-07	1.74543e-05
ENSMUSG00000079555	Haus3	372.708	349.697	149.353	162.572	361.203	155.963	2.31576	1.21149	1.67268e-06	3.74445e-05
ENSMUSG00000056290	Ms4a4b	168.606	113.908	61.1808	60.856	141.257	61.0184	2.31566	1.21142	0.00230262	0.0164116
ENSMUSG00000021619	Atg10	302.825	309.83	143.055	121.712	306.328	132.383	2.31448	1.21069	8.92304e-06	0.000155167
ENSMUSG00000055407	Map6	316.136	799.634	270.815	211.257	557.885	241.036	2.31441	1.21064	0.00243421	0.0170889
ENSMUSG00000079588	Tmem182	1894.6	1996.81	1018.48	663.33	1945.7	840.905	2.31414	1.21047	2.01267e-07	5.7934e-06
ENSMUSG00000042745	Id1	734.324	1010.36	419.268	334.708	872.344	376.988	2.31412	1.21046	8.87418e-07	2.14031e-05
ENSMUSG00000024766	Lipo3	362.725	391.843	186.241	139.969	377.284	163.105	2.31386	1.2103	8.42622e-06	0.000148238
ENSMUSG00000030087	Klf15	1398.77	1567.37	572.22	712.884	1483.07	642.552	2.30771	1.20646	9.24742e-10	4.99927e-08
ENSMUSG00000078695	Cisd3	574.592	992.138	364.385	314.712	783.365	339.549	2.30697	1.206	3.61194e-05	0.000508765
ENSMUSG00000027984	Hadh	6700.98	7610.19	3184.1	3027.15	7155.59	3105.62	2.30407	1.20419	2.28588e-15	3.74554e-13
ENSMUSG00000000440	Pparg	3582.88	4854.76	1625.79	2038.68	4218.82	1832.23	2.3024	1.20314	1.18053e-08	4.97701e-07
ENSMUSG00000020268	Lyrm7	147.53	143.524	64.7796	61.7254	145.527	63.2525	2.30099	1.20226	0.000811545	0.00708331
ENSMUSG00000028405	Aco1	5480.81	6548.57	2581.29	2655.06	6014.69	2618.17	2.29723	1.19989	1.21607e-13	1.4006e-11
ENSMUSG00000006494	Pdk1	1831.37	2572.04	1068.86	862.416	2201.71	965.64	2.2801	1.1891	1.2262e-07	3.84403e-06
ENSMUSG00000059173	Pde1a	875.199	987.582	370.683	446.857	931.391	408.77	2.27804	1.18779	1.05493e-08	4.49518e-07
ENSMUSG00000079508	Apoo	409.314	481.831	222.23	169.527	445.572	195.879	2.27523	1.18601	6.77419e-06	0.000123332
ENSMUSG00000028158	Mttp	196.337	273.379	116.063	90.4146	234.858	103.239	2.27518	1.18598	0.000428286	0.00411808
ENSMUSG00000004360	9330159F19Rik	325.01	135.55	98.0691	105.194	230.28	101.632	2.26638	1.18039	0.00715469	0.0401967
ENSMUSG00000026626	Ppp2r5a	13078.1	18362	7401.07	6489.86	15720	6945.46	2.26335	1.17846	4.09887e-09	1.93316e-07
ENSMUSG00000104453	Gm37829	217.413	186.809	92.6708	86.0678	202.111	89.3693	2.26208	1.17765	0.000222227	0.00239788
ENSMUSG00000046470	Sox18	1532.98	1885.18	703.579	809.385	1709.08	756.482	2.25896	1.17566	1.52798e-09	7.91063e-08
ENSMUSG00000063406	Tmed5	3435.35	3187.15	1439.55	1492.71	3311.25	1466.13	2.25849	1.17536	1.13438e-14	1.58156e-12
ENSMUSG00000039470	Zdhhc2	448.137	338.307	169.147	179.96	393.222	174.553	2.25292	1.17179	1.35647e-05	0.000222495
ENSMUSG00000091803	Cox16	214.085	251.737	112.465	94.7615	232.911	103.613	2.24822	1.16878	0.000151906	0.00174577
ENSMUSG00000063060	Sox7	533.55	599.156	244.723	259.073	566.353	251.898	2.24803	1.16866	1.12132e-07	3.54321e-06
ENSMUSG00000051705	Senp8	167.497	157.193	65.6793	79.1128	162.345	72.3961	2.24186	1.1647	0.000844797	0.00728947
ENSMUSG00000024168	Tmem204	583.466	813.303	330.196	292.978	698.384	311.587	2.24132	1.16435	2.51985e-06	5.27675e-05
ENSMUSG00000063568	Jazf1	339.431	427.155	181.743	160.834	383.293	171.288	2.23775	1.16205	1.24747e-05	0.000206965
ENSMUSG00000022419	Deptor	5823.57	7749.16	3077.93	2995.85	6786.36	3036.89	2.23461	1.16002	3.68775e-10	2.21181e-08
ENSMUSG00000043162	Pyurf	594.558	631.05	287.909	261.681	612.804	274.795	2.23023	1.15719	5.57357e-08	1.93175e-06
ENSMUSG00000037010	Apln	256.237	674.335	257.319	159.964	465.286	208.642	2.23013	1.15713	0.00785458	0.0432424
ENSMUSG00000031808	Slc27a1	14194	18490.7	6204.45	8454.64	16342.3	7329.54	2.22961	1.15679	4.19888e-08	1.49634e-06
ENSMUSG00000023828	Slc22a3	1021.62	1563.96	556.925	604.213	1292.79	580.569	2.22649	1.15477	2.20079e-06	4.72057e-05
ENSMUSG00000002944	Cd36	60593.9	54490.2	23654.5	28074.6	57542	25864.5	2.22474	1.15364	4.27587e-13	4.4711e-11
ENSMUSG00000064367	mt-Nd5	108241	97215.9	47909.9	44471.8	102728	46190.9	2.224	1.15316	1.08763e-15	1.87901e-13
ENSMUSG00000038195	Rilp	180.808	313.247	130.459	92.1533	247.027	111.306	2.21955	1.15027	0.00247639	0.0173239
ENSMUSG00000026853	Crat	6543.47	6882.32	2880.89	3188.85	6712.9	3034.87	2.21185	1.14526	1.04981e-14	1.47661e-12
ENSMUSG00000090150	Acad11	2259.54	3167.78	1064.37	1389.26	2713.66	1226.81	2.21174	1.14518	5.29604e-07	1.36648e-05
ENSMUSG00000071657	Bscl2	4115.32	5673.76	2262.79	2167.34	4894.54	2215.07	2.20962	1.1438	5.75072e-09	2.59665e-07
ENSMUSG00000027900	Dram2	1945.63	1933.02	834.937	922.403	1939.32	878.67	2.20697	1.14207	3.79386e-12	3.20742e-10
ENSMUSG00000030869	Ndufab1	1739.31	2157.42	900.617	865.894	1948.36	883.255	2.20582	1.14132	7.29456e-10	4.05384e-08
ENSMUSG00000039196	Orm1	1565.15	2774.8	1016.68	951.961	2169.98	984.321	2.20445	1.14042	2.01384e-05	0.00031106
ENSMUSG00000041696	Rasl12	1211.3	1393.09	583.017	599.866	1302.2	591.441	2.20157	1.13854	4.2155e-10	2.48152e-08
ENSMUSG00000037071	Scd1	595054	880774	312403	358879	737914	335641	2.19852	1.13653	6.99993e-08	2.34719e-06
ENSMUSG00000025488	Cox8b	851.905	1019.48	470.552	381.654	935.691	426.103	2.19614	1.13497	1.78986e-07	5.22942e-06
ENSMUSG00000047496	Rnf152	288.405	241.485	91.7711	149.532	264.945	120.651	2.19501	1.13422	0.000893523	0.00760667
ENSMUSG00000054013	Tmem179	1090.39	2009.34	696.381	716.362	1549.87	706.371	2.19394	1.13352	5.95432e-05	0.000773819
ENSMUSG00000066687	Zbtb16	1311.13	1455.74	385.079	876.326	1383.44	630.703	2.19308	1.13296	0.000697612	0.00620126
ENSMUSG00000044986	Tst	1263.44	1183.5	502.942	612.907	1223.47	557.924	2.19263	1.13266	5.59705e-09	2.54498e-07
ENSMUSG00000022040	Ephx2	6735.37	4429.88	2198.91	2901.96	5582.63	2550.43	2.18887	1.13019	2.31142e-06	4.92462e-05
ENSMUSG00000020826	Nos2	208.539	421.46	161.949	126.059	314.999	144.004	2.18733	1.12917	0.00316905	0.0211545
ENSMUSG00000031938	4931406C07Rik	3721.54	4081.32	1812.03	1764.82	3901.43	1788.43	2.18147	1.1253	9.98808e-14	1.16728e-11
ENSMUSG00000028145	Them4	159.732	198.2	80.9745	84.329	178.966	82.6518	2.16479	1.11423	0.000965729	0.00807858
ENSMUSG00000040710	St8sia4	705.484	722.177	331.996	327.753	713.83	329.874	2.16395	1.11367	1.89294e-08	7.54045e-07
ENSMUSG00000022110	Sucla2	3220.16	3665.56	1628.49	1557.04	3442.86	1592.77	2.16155	1.11206	2.9283e-12	2.5433e-10
ENSMUSG00000022477	Aco2	8082	13093.7	4954.74	4843.27	10587.9	4899	2.1612	1.11183	1.49714e-06	3.38486e-05
ENSMUSG00000046764	A530053G22Rik	393.784	462.466	186.241	210.388	428.125	198.315	2.15827	1.10988	7.19714e-06	0.000129695
ENSMUSG00000064339	mt-Rnr2	12032	8005.45	4203.48	5099.73	10018.7	4651.6	2.15382	1.1069	7.26631e-07	1.81589e-05
ENSMUSG00000026525	Opn3	657.786	576.374	253.72	319.929	617.08	286.824	2.15107	1.10505	2.27469e-06	4.85414e-05
ENSMUSG00000011382	Dhdh	2674.4	3352.31	1414.36	1388.39	3013.36	1401.37	2.15023	1.10449	6.85741e-10	3.8513e-08
ENSMUSG00000044906	4930503L19Rik	407.095	386.148	176.345	193	396.622	184.672	2.14751	1.10266	5.33807e-06	0.000101124
ENSMUSG00000026678	Rgs5	9887.86	9499.93	4816.18	4212.1	9693.89	4514.14	2.1475	1.10266	2.18536e-13	2.42895e-11
ENSMUSG00000021764	Ndufs4	1369.92	1851	831.338	670.285	1610.46	750.812	2.14503	1.101	7.68092e-07	1.89272e-05
ENSMUSG00000038302	Afg1l	359.397	446.519	194.339	181.699	402.958	188.019	2.14308	1.09969	1.72291e-05	0.00027344
ENSMUSG00000111840	Gm48832	569.046	443.102	186.241	286.023	506.074	236.132	2.14268	1.09941	0.000167801	0.00188749
ENSMUSG00000097177	9330159M07Rik	130.892	169.723	60.281	79.9822	150.307	70.1316	2.14191	1.0989	0.00391388	0.024853
ENSMUSG00000040990	Sh3kbp1	1091.5	1355.5	573.12	570.308	1223.5	571.714	2.13992	1.09756	2.47246e-08	9.26821e-07
ENSMUSG00000078866	Zfp970	560.172	470.44	234.826	246.901	515.306	240.864	2.1395	1.09727	2.19859e-06	4.72057e-05
ENSMUSG00000045954	Cavin2	9528.46	9388.3	4070.32	4786.76	9458.38	4428.54	2.13573	1.09473	1.55676e-12	1.43855e-10
ENSMUSG00000039428	Tmem135	2961.7	3803.39	1604.2	1565.74	3382.54	1584.97	2.13408	1.09362	2.25675e-09	1.14232e-07
ENSMUSG00000022053	Ebf2	820.846	654.971	292.408	399.911	737.908	346.159	2.13139	1.09179	1.23357e-05	0.000205302
ENSMUSG00000018740	Slc25a35	976.141	1649.39	680.186	553.789	1312.76	616.988	2.12767	1.08928	7.09421e-05	0.000899166
ENSMUSG00000064372	mt-Tp	3210.17	1925.04	1251.51	1162.35	2567.61	1206.93	2.12753	1.08918	1.34512e-05	0.00022109
ENSMUSG00000028427	Aqp7	3432.02	2420.54	1336.08	1416.21	2926.28	1376.14	2.1265	1.08848	1.87349e-07	5.42391e-06
ENSMUSG00000063428	Ddo	356.07	648.136	240.224	232.122	502.103	236.173	2.12566	1.08791	0.000647583	0.00585477
ENSMUSG00000049091	Sephs2	1008.31	1321.33	532.632	563.353	1164.82	547.992	2.12536	1.08771	2.35528e-07	6.64508e-06
ENSMUSG00000026986	Hnmt	615.634	580.931	224.03	339.055	598.282	281.542	2.12438	1.08705	4.10528e-05	0.000564441
ENSMUSG00000060429	Sntb1	2339.41	2927.44	1292.89	1191.91	2633.42	1242.4	2.1196	1.0838	3.48082e-09	1.67143e-07
ENSMUSG00000025059	Gk	333.884	424.877	176.345	182.568	379.381	179.456	2.11366	1.07974	3.96141e-05	0.000547978
ENSMUSG00000041134	Cyyr1	1438.7	1186.92	662.192	580.74	1312.81	621.466	2.11274	1.07912	4.51884e-08	1.59605e-06
ENSMUSG00000050549	Fam241a	344.977	528.533	197.038	216.473	436.755	206.756	2.11186	1.07851	0.000198971	0.00218703
ENSMUSG00000048772	Tmem53	318.355	474.996	161.049	214.735	396.676	187.892	2.11031	1.07746	0.00045427	0.00433644
ENSMUSG00000051243	Islr2	191.9	153.776	61.1808	102.586	172.838	81.8833	2.10977	1.07708	0.00600975	0.0348864
ENSMUSG00000038007	Acer2	829.72	748.375	309.503	439.032	789.048	374.268	2.1078	1.07574	8.26747e-06	0.000146329
ENSMUSG00000038462	Uqcrfs1	4240.67	5589.46	2432.83	2232.55	4915.07	2332.69	2.10702	1.0752	1.03238e-08	4.43476e-07
ENSMUSG00000109674	Gm45470	572.373	406.651	225.829	239.077	489.512	232.453	2.10607	1.07456	4.65016e-05	0.000625822
ENSMUSG00000000058	Cav2	9294.41	8756.11	4082.92	4491.17	9025.26	4287.04	2.10522	1.07397	1.78439e-13	2.01142e-11
ENSMUSG00000015843	Rxrg	428.171	291.604	165.548	176.482	359.888	171.015	2.10469	1.07361	0.000250661	0.002656
ENSMUSG00000025968	Ndufs1	2777.56	3845.53	1692.37	1457.94	3311.55	1575.15	2.10237	1.07201	2.60749e-07	7.27077e-06
ENSMUSG00000027217	Tspan18	1245.69	1567.37	696.381	642.465	1406.53	669.423	2.10107	1.07113	6.08727e-08	2.0762e-06
ENSMUSG00000027792	Bche	3394.31	3399.01	1413.46	1823.07	3396.66	1618.26	2.0988	1.06956	4.84225e-09	2.23729e-07
ENSMUSG00000016194	Hsd11b1	1432.04	3001.48	1013.08	1101.49	2216.76	1057.29	2.09651	1.06799	0.000508078	0.00476863
ENSMUSG00000050663	Trhde	267.329	249.458	117.863	128.667	258.394	123.265	2.09608	1.06769	0.000155164	0.00177807
ENSMUSG00000094786	Gm14403	205.211	190.226	76.4759	112.149	197.719	94.3124	2.09545	1.06726	0.00196636	0.0144357
ENSMUSG00000025277	Abhd6	520.239	749.514	279.812	326.014	634.877	302.913	2.09538	1.06721	4.00733e-05	0.000552886
ENSMUSG00000031924	Cyb5b	8891.75	11104.9	5047.41	4501.6	9998.32	4774.51	2.09411	1.06634	9.09408e-10	4.93315e-08
ENSMUSG00000061313	Ddhd2	2011.07	2731.51	1125.55	1139.75	2371.29	1132.65	2.09347	1.0659	1.0728e-07	3.41706e-06
ENSMUSG00000035834	Polr3g	137.547	255.154	102.568	85.1984	196.35	93.8831	2.0912	1.06433	0.00773216	0.0427907
ENSMUSG00000027274	Mkks	271.766	249.458	113.364	136.491	260.612	124.928	2.08567	1.06051	0.000246108	0.00261124
ENSMUSG00000054676	1600014C10Rik	2112.01	2449.02	980.691	1207.56	2280.52	1094.12	2.0841	1.05942	2.05923e-08	8.14026e-07
ENSMUSG00000002475	Abhd3	214.085	228.955	90.8714	121.712	221.52	106.292	2.08312	1.05875	0.000878494	0.0075271
ENSMUSG00000031708	Tecr	3250.1	5818.42	2368.95	1985.64	4534.26	2177.3	2.0825	1.05831	7.16201e-05	0.000907036
ENSMUSG00000042284	Itga1	2857.43	2566.35	1314.49	1291.02	2711.89	1302.75	2.08173	1.05778	2.44288e-11	1.86669e-09
ENSMUSG00000020190	Mknk2	9988.8	11354.3	4961.94	5292.73	10671.6	5127.34	2.08127	1.05747	2.17607e-12	1.95403e-10
ENSMUSG00000022018	Rgcc	3853.54	3772.63	1744.55	1922.18	3813.08	1833.37	2.07976	1.05642	3.12425e-12	2.69874e-10
ENSMUSG00000022265	Ank	1398.77	2569.76	1012.18	897.191	1984.26	954.686	2.07838	1.05546	0.000156249	0.00178406
ENSMUSG00000036186	Dipk1b	174.152	340.585	124.161	123.451	257.369	123.806	2.07824	1.05537	0.00546888	0.0324337
ENSMUSG00000001918	Slc1a5	22666.4	34793.2	13101.7	14559.4	28729.8	13830.5	2.07726	1.05468	1.37383e-06	3.12384e-05
ENSMUSG00000019437	Tlcd1	754.291	1087.82	446.26	440.771	921.056	443.515	2.07651	1.05416	9.40548e-06	0.00016249
ENSMUSG00000030884	Uqcrc2	3866.85	4566.57	2029.76	2035.2	4216.71	2032.48	2.07461	1.05284	8.07999e-11	5.51173e-09
ENSMUSG00000025903	Lypla1	1497.49	1399.93	715.275	681.587	1448.71	698.431	2.07436	1.05267	6.36198e-10	3.61133e-08
ENSMUSG00000026723	Trdmt1	138.656	158.332	76.4759	66.9416	148.494	71.7088	2.07102	1.05034	0.00326987	0.0216531
ENSMUSG00000021792	Prxl2a	5348.81	5622.5	2643.37	2655.93	5485.65	2649.65	2.07031	1.04985	1.36044e-13	1.5556e-11
ENSMUSG00000038936	Sccpdh	788.677	1073.01	449.858	449.465	930.845	449.662	2.06989	1.04955	2.98599e-06	6.13169e-05
ENSMUSG00000039167	Adgrl4	2302.8	1926.18	928.508	1114.53	2114.49	1021.52	2.06986	1.04954	3.56131e-08	1.29232e-06
ENSMUSG00000020089	Ppa1	2518	2004.78	1144.44	1041.51	2261.39	1092.97	2.0692	1.04907	2.25114e-08	8.63963e-07
ENSMUSG00000032492	Pth1r	1160.28	2231.46	996.886	645.943	1695.87	821.415	2.06462	1.04587	0.00115181	0.00935457
ENSMUSG00000061273	Mmgt1	1314.46	1511.56	701.779	668.546	1413.01	685.163	2.06227	1.04423	6.09611e-09	2.72934e-07
ENSMUSG00000037493	Cib2	1911.24	1866.95	956.399	877.196	1889.1	916.797	2.06067	1.04311	1.6808e-10	1.05591e-08
ENSMUSG00000021290	Atp5mpl	1260.11	1630.02	816.943	585.956	1445.07	701.45	2.06028	1.04284	1.01756e-05	0.000174467
ENSMUSG00000091561	Gm6665	103.16	126.438	56.6822	54.7704	114.799	55.7263	2.0598	1.04251	0.00902733	0.0482774
ENSMUSG00000028223	Decr1	3960.03	4099.55	1882.21	2034.33	4029.79	1958.27	2.05776	1.04108	2.74218e-12	2.42135e-10
ENSMUSG00000009863	Sdhb	3795.86	4027.79	2101.74	1700.49	3911.82	1901.11	2.05775	1.04107	1.97164e-09	1.0044e-07
ENSMUSG00000005683	Cs	9492.97	13350	5805.87	5303.16	11421.5	5554.52	2.05624	1.04001	1.61122e-07	4.78669e-06
ENSMUSG00000029417	Cxcl9	912.913	822.416	346.391	498.15	867.665	422.27	2.05436	1.03869	1.55154e-05	0.000248591
ENSMUSG00000022551	Cyc1	3793.64	5468.72	2392.35	2117.79	4631.18	2255.07	2.05366	1.0382	9.22672e-07	2.21525e-05
ENSMUSG00000054200	Ffar4	564.609	388.426	191.64	273.852	476.517	232.746	2.04712	1.03359	0.000581072	0.00532615
ENSMUSG00000024146	Cript	936.208	912.403	440.861	462.505	924.305	451.683	2.04628	1.03301	2.32723e-08	8.8916e-07
ENSMUSG00000000317	Bcl6b	471.432	580.931	285.21	229.514	526.181	257.362	2.04474	1.03192	3.31565e-05	0.000473912
ENSMUSG00000021731	Mrps30	543.533	587.765	251.921	302.541	565.649	277.231	2.03986	1.02847	5.45068e-06	0.000103012
ENSMUSG00000025940	Tmem70	1345.52	1197.17	645.097	601.605	1271.35	623.351	2.03973	1.02838	1.31155e-08	5.47133e-07
ENSMUSG00000039782	Cpeb2	1110.36	1521.81	619.905	672.024	1316.09	645.964	2.03715	1.02655	2.27528e-06	4.85414e-05
ENSMUSG00000044792	Isca1	2307.24	2714.43	1296.49	1172.78	2510.83	1234.64	2.03368	1.02409	3.82924e-09	1.81137e-07
ENSMUSG00000074604	Mgst2	360.507	503.473	231.227	193.87	431.99	212.549	2.03245	1.02322	0.000216002	0.00234024
ENSMUSG00000037710	Cisd1	1311.13	1456.88	717.974	644.204	1384.01	681.089	2.03213	1.02299	1.3911e-08	5.788e-07
ENSMUSG00000040006	Ginm1	3338.84	4626.94	1915.5	2004.77	3982.89	1960.13	2.03187	1.02281	2.84531e-07	7.85127e-06
ENSMUSG00000063873	Slc24a3	1315.57	1668.75	678.387	790.258	1492.16	734.323	2.03174	1.02272	5.35965e-07	1.37842e-05
ENSMUSG00000024990	Rbp4	4021.03	4402.54	2059.45	2087.36	4211.79	2073.41	2.0313	1.0224	7.4808e-12	6.09743e-10
ENSMUSG00000022013	Dnajc15	1501.93	1551.43	753.963	752.875	1526.68	753.419	2.02631	1.01885	6.25655e-10	3.56421e-08
ENSMUSG00000044317	Gpr4	348.305	398.678	179.943	188.654	373.491	184.298	2.02624	1.0188	4.33984e-05	0.00058955
ENSMUSG00000019809	Pex3	955.065	957.966	434.563	509.452	956.516	472.007	2.0262	1.01878	1.5158e-07	4.53712e-06
ENSMUSG00000033105	Lss	668.878	1250.71	566.822	382.523	959.794	474.673	2.02207	1.01583	0.00174252	0.0131383
ENSMUSG00000037031	Tspan15	970.594	1098.07	550.627	472.938	1034.33	511.782	2.02118	1.0152	2.66578e-07	7.40732e-06
ENSMUSG00000025271	Pfkfb1	963.939	1209.7	524.535	551.181	1086.82	537.858	2.02041	1.01465	5.78946e-07	1.48176e-05
ENSMUSG00000024480	Ap3s1	2306.13	2146.03	1018.48	1185.82	2226.08	1102.15	2.01965	1.0141	3.20412e-09	1.56696e-07
ENSMUSG00000033308	Dpyd	760.946	787.104	322.099	445.987	774.025	384.043	2.01496	1.01075	1.48331e-05	0.000238621
ENSMUSG00000027673	Ndufb5	1642.8	1880.62	917.711	831.119	1761.71	874.415	2.01477	1.01061	1.03549e-08	4.43613e-07
ENSMUSG00000040724	Kcna2	181.917	121.882	68.3785	82.5903	151.899	75.4844	2.01237	1.0089	0.00918503	0.0489232
ENSMUSG00000025466	Fuom	273.985	333.75	167.347	134.753	303.868	151.05	2.01199	1.00862	0.000424251	0.00409414
ENSMUSG00000107881	Gm44250	1737.09	1677.86	733.269	964.133	1707.48	848.701	2.01163	1.00836	3.71572e-07	9.92565e-06
ENSMUSG00000050705	2310061I04Rik	572.373	705.09	326.597	308.627	638.732	317.612	2.01095	1.00787	6.13271e-06	0.000113605
ENSMUSG00000024899	Papss2	1194.66	1771.27	662.192	812.862	1482.97	737.527	2.01044	1.00751	3.09499e-05	0.000446386
ENSMUSG00000039264	Gimap3	258.455	164.027	126.86	83.4596	211.241	105.16	2.01005	1.00723	0.00856708	0.0462675
ENSMUSG00000043673	Kcns3	646.693	582.07	271.715	339.924	614.381	305.819	2.00864	1.00622	1.12339e-05	0.000188744
ENSMUSG00000026526	Fh1	3204.63	3584.68	1770.64	1610.94	3394.65	1690.79	2.00776	1.00558	3.8395e-10	2.28558e-08
ENSMUSG00000022964	Tmem50b	1415.4	1710.9	745.865	811.123	1563.15	778.494	2.00771	1.00555	7.62179e-08	2.51852e-06
ENSMUSG00000001755	Coasy	1351.07	2103.88	826.84	894.583	1727.47	860.711	2.00684	1.00493	2.85422e-05	0.000417341
ENSMUSG00000030284	Creld1	1012.75	1710.9	734.169	624.209	1361.82	679.189	2.00501	1.00361	0.000192941	0.00212958
ENSMUSG00000021719	Rgs7bp	277.313	266.545	129.559	141.708	271.929	135.633	2.00467	1.00337	0.000251357	0.00266161
ENSMUSG00000050556	Kcnb1	1341.08	1451.19	688.283	705.06	1396.14	696.672	2.00391	1.00282	4.56801e-09	2.11673e-07
ENSMUSG00000007682	Dio2	179.699	140.107	71.0776	88.6759	159.903	79.8768	2.0016	1.00116	0.00566483	0.0333469
ENSMUSG00000028127	Abcd3	2574.57	3695.17	1529.52	1603.99	3134.87	1566.75	2.00077	1.00055	1.94364e-06	4.261e-05
ENSMUSG00000021236	Entpd5	1425.39	1925.04	836.737	838.074	1675.22	837.405	2.00035	1.00025	1.12753e-06	2.63932e-05
ENSMUSG00000014243	Zswim7	151.967	201.617	83.6737	93.0227	176.792	88.3482	2.00035	1.00025	0.00377904	0.0242194
ENSMUSG00000028603	Scp2	11199	11297.4	5626.83	5620.48	11248.2	5623.66	2.00016	1.00011	9.86387e-14	1.16131e-11
ENSMUSG00000033096	Apmap	3251.21	3462.8	1597	1759.61	3357.01	1678.3	2.00014	1.0001	1.26865e-10	8.09794e-09
ENSMUSG00000034858	Fam214a	2703.24	1479.66	991.488	1101.49	2091.45	1046.49	1.99861	0.998999	0.000294825	0.00304085
ENSMUSG00000021136	Smoc1	4080.93	4524.42	1854.32	2451.63	4302.68	2152.97	1.99835	0.99881	1.53319e-07	4.57195e-06
ENSMUSG00000047260	Emc6	1295.6	1820.25	829.539	730.272	1557.93	779.905	1.99755	0.998232	6.5554e-06	0.000120314
ENSMUSG00000041697	Cox6a1	7567.31	8746.99	4167.49	4006.93	8157.15	4087.21	1.99576	0.996941	7.68191e-11	5.30854e-09
ENSMUSG00000029446	Psph	381.582	672.057	323.898	204.302	526.82	264.1	1.99495	0.996349	0.00388404	0.0247129
ENSMUSG00000025558	Dock9	4138.61	4869.57	2047.76	2469.01	4504.09	2258.39	1.99427	0.99586	2.40633e-08	9.10625e-07
ENSMUSG00000027762	Sucnr1	660.004	485.248	224.929	349.487	572.626	287.208	1.99342	0.995244	0.000726366	0.00641738
ENSMUSG00000035151	Elmod2	1376.58	1173.25	593.813	685.934	1274.92	639.874	1.99237	0.994485	2.90637e-07	8.00586e-06
ENSMUSG00000037062	Sh3glb1	8616.66	9694.71	4336.64	4856.31	9155.68	4596.47	1.99185	0.994105	1.47491e-10	9.30248e-09
ENSMUSG00000048371	Pdp2	484.743	836.085	276.213	386.87	660.414	331.542	1.99137	0.993764	0.00155007	0.0119423
ENSMUSG00000027222	Pex16	1295.6	2076.54	910.514	784.173	1686.07	847.343	1.98979	0.992614	7.8809e-05	0.000985515
ENSMUSG00000022490	Ppp1r1a	1229.05	1807.72	840.336	687.673	1518.38	764.004	1.98741	0.990889	3.37447e-05	0.000480963
ENSMUSG00000068706	Gm10250	656.676	621.938	320.299	323.406	639.307	321.853	1.98638	0.990139	1.15888e-06	2.70473e-05
ENSMUSG00000021180	Rps6ka5	453.684	371.34	181.743	233.861	412.512	207.802	1.98482	0.989005	0.000211204	0.00230226
ENSMUSG00000027357	Crls1	1445.35	1407.9	676.587	762.439	1426.63	719.513	1.98262	0.987409	1.55638e-08	6.34286e-07
ENSMUSG00000000805	Car4	858.56	639.024	363.486	392.956	748.792	378.221	1.97988	0.985416	2.15653e-05	0.000328943
ENSMUSG00000056899	Immp2l	159.732	234.65	109.765	89.5452	197.191	99.6554	1.97874	0.984583	0.00593151	0.0344826
ENSMUSG00000063698	Sfxn4	149.749	146.941	67.4788	82.5903	148.345	75.0345	1.97641	0.982886	0.00566755	0.0333506
ENSMUSG00000036745	Ttll7	216.304	145.802	101.668	81.7209	181.053	91.6945	1.97557	0.982268	0.0072904	0.0407544
ENSMUSG00000042569	Dhrs7b	1335.54	1427.27	670.289	728.533	1381.4	699.411	1.97492	0.981796	1.58522e-08	6.44385e-07
ENSMUSG00000028792	Ak2	2674.4	5484.67	2099.04	2033.46	4079.54	2066.25	1.97431	0.98135	0.000830401	0.00719265
ENSMUSG00000052337	Immt	4087.59	4739.71	2253.79	2222.11	4413.65	2237.95	1.97215	0.979769	5.45011e-10	3.12722e-08
ENSMUSG00000028399	Ptprd	1566.26	1947.83	953.7	828.511	1757.04	891.105	1.97179	0.979502	5.00918e-07	1.30091e-05
ENSMUSG00000024592	C330018D20Rik	403.767	433.989	215.032	210.388	418.878	212.71	1.9692	0.977611	2.80967e-05	0.000411206
ENSMUSG00000012705	Retn	17602.7	20153.7	9402.04	9787.38	18878.2	9594.71	1.96755	0.9764	4.2205e-11	3.03532e-09
ENSMUSG00000002010	Idh3g	3474.17	3356.87	1770.64	1706.58	3415.52	1738.61	1.96456	0.974204	4.00171e-11	2.93102e-09
ENSMUSG00000063430	Wscd2	330.557	371.34	185.342	172.136	350.948	178.739	1.9635	0.973431	0.000116868	0.00138413
ENSMUSG00000021763	Cspg4b	516.911	735.846	304.104	333.839	626.378	318.971	1.96333	0.973305	0.000117305	0.00138724
ENSMUSG00000026384	Ptpn4	2770.91	2339.67	1240.71	1364.04	2555.29	1302.38	1.96201	0.972335	2.2516e-08	8.63963e-07
ENSMUSG00000020744	Slc25a19	1678.3	2144.89	1130.94	818.948	1911.59	974.946	1.96084	0.971469	1.82705e-05	0.000286948
ENSMUSG00000019768	Esr1	2732.08	2865.92	1490.83	1364.91	2799	1427.87	1.96032	0.971089	4.8721e-10	2.83653e-08
ENSMUSG00000024099	Ndufv2	2212.96	2925.16	1471.94	1149.31	2569.06	1310.62	1.96023	0.971025	5.96774e-06	0.000111067
ENSMUSG00000031245	Hmgn5	376.036	472.718	240.224	193	424.377	216.612	1.95935	0.970376	0.000237529	0.00254399
ENSMUSG00000044122	Proca1	392.675	454.493	218.631	213.865	423.584	216.248	1.95865	0.969859	4.86477e-05	0.000649753
ENSMUSG00000057388	Mrpl18	564.609	660.666	338.294	287.762	612.637	313.028	1.95729	0.968854	1.73214e-05	0.00027421
ENSMUSG00000055639	Dach1	328.338	238.068	126.86	162.572	283.203	144.716	1.95678	0.968484	0.00192017	0.0141686
ENSMUSG00000024259	Slc25a46	1530.77	1536.62	732.37	835.466	1533.69	783.918	1.95627	0.968108	2.4687e-08	9.26821e-07
ENSMUSG00000054435	Gimap4	756.509	635.607	381.48	330.361	696.058	355.921	1.95607	0.967958	9.9954e-06	0.000171562
ENSMUSG00000019864	Rtn4ip1	390.456	494.361	245.623	206.91	442.408	226.267	1.95535	0.967427	0.000166011	0.00187266
ENSMUSG00000012819	Cdh23	246.254	269.962	117.863	146.054	258.108	131.959	1.95527	0.967368	0.000891654	0.00759483
ENSMUSG00000026676	Ccdc3	1822.5	1209.7	749.464	801.56	1516.1	775.512	1.95507	0.967218	3.66637e-05	0.000515237
ENSMUSG00000022579	Gpihbp1	1931.21	1959.22	1139.04	851.984	1945.21	995.513	1.9542	0.966576	1.17329e-06	2.72635e-05
ENSMUSG00000000088	Cox5a	1506.36	2286.13	1055.37	885.889	1896.25	970.629	1.95361	0.966142	5.19432e-05	0.000686843
ENSMUSG00000046916	Myct1	382.692	508.03	215.932	239.946	445.361	227.939	1.95336	0.965954	0.000190492	0.00210841
ENSMUSG00000091639	Gm3756	144.203	187.948	95.37	74.7659	166.075	85.068	1.95254	0.965354	0.00727642	0.0407261
ENSMUSG00000006818	Sod2	2642.24	4000.45	1804.83	1599.64	3321.34	1702.24	1.95113	0.964311	1.96628e-05	0.000304304
ENSMUSG00000040111	Gramd1b	749.854	555.871	336.494	332.969	652.862	334.732	1.95067	0.963971	4.71469e-05	0.000632899
ENSMUSG00000033849	B3galt2	8187.38	4558.6	3041.04	3495.74	6372.99	3268.39	1.9499	0.963403	0.00024103	0.00256937
ENSMUSG00000045636	Mtus1	3571.79	3618.86	1774.24	1916.09	3595.32	1845.17	1.94844	0.962323	1.15647e-10	7.55776e-09
ENSMUSG00000090222	Ifi203-ps	299.498	284.77	132.258	167.789	292.134	150.024	1.94672	0.961045	0.000603897	0.00550758
ENSMUSG00000028636	Ppcs	309.481	410.069	187.141	182.568	359.775	184.855	1.94599	0.960501	0.000386598	0.00379916
ENSMUSG00000051391	Ywhag	10114.1	15488.1	6600.32	6562.01	12801.1	6581.17	1.94509	0.959837	9.03665e-06	0.000156971
ENSMUSG00000021238	Aldh6a1	10546.8	8291.36	4431.11	5265.78	9419.06	4848.44	1.94269	0.958054	2.31959e-07	6.57175e-06
ENSMUSG00000029545	Acads	2911.78	3148.42	1407.16	1715.27	3030.1	1561.21	1.94071	0.956585	4.47916e-08	1.58556e-06
ENSMUSG00000063931	Pepd	2074.3	2484.33	1135.44	1214.51	2279.32	1174.98	1.93975	0.955868	5.23178e-08	1.82756e-06
ENSMUSG00000022634	Yaf2	778.694	829.25	368.884	460.767	803.972	414.825	1.93769	0.954337	7.08586e-06	0.000128272
ENSMUSG00000093661	Eif4e3	1235.71	1583.32	773.757	682.456	1409.51	728.106	1.93586	0.952973	3.00122e-06	6.14708e-05
ENSMUSG00000019528	Gyg	1992.21	1887.46	1096.75	908.493	1939.83	1002.62	1.93496	0.952305	1.00991e-07	3.23618e-06
ENSMUSG00000049241	Hcar1	2979.45	2057.18	1116.55	1486.62	2518.31	1301.59	1.93476	0.952156	6.30468e-05	0.000814026
ENSMUSG00000095079	Igha	729.887	1522.95	592.913	572.916	1126.42	582.915	1.93222	0.95026	0.00284046	0.0193678
ENSMUSG00000023909	Paqr4	515.802	747.236	306.803	346.879	631.519	326.841	1.93175	0.949909	0.000224064	0.00241606
ENSMUSG00000029190	D5Ertd579e	3305.57	4513.03	2077.45	1970.86	3909.3	2024.16	1.93128	0.949559	1.25388e-06	2.88409e-05
ENSMUSG00000055782	Abcd2	8940.56	12422.8	5183.27	5881.3	10681.7	5532.28	1.93075	0.949161	1.74779e-06	3.89067e-05
ENSMUSG00000086429	Gt(ROSA)26Sor	351.633	279.075	148.453	178.221	315.354	163.337	1.93055	0.949015	0.000773945	0.00676999
ENSMUSG00000038949	Cnst	1268.98	2518.51	986.989	975.435	1893.74	981.212	1.92989	0.948517	0.00130695	0.0103347
ENSMUSG00000026027	Stradb	598.995	691.421	340.993	327.753	645.208	334.373	1.92953	0.948253	7.16467e-06	0.000129404
ENSMUSG00000000706	Btn1a1	1197.99	658.388	403.073	559.006	928.189	481.039	1.92953	0.948252	0.00231266	0.0164463
ENSMUSG00000014905	Dnajb9	1425.39	1051.37	623.504	662.461	1238.38	642.982	1.92609	0.945675	1.06933e-05	0.000181193
ENSMUSG00000057315	Arhgap24	488.07	554.732	284.311	257.334	521.401	270.822	1.92532	0.945098	2.7335e-05	0.000401907
ENSMUSG00000042709	Atpaf2	1022.73	1262.1	582.117	605.082	1142.41	593.6	1.92436	0.944379	1.64589e-06	3.68967e-05
ENSMUSG00000032878	Ccdc85a	334.994	413.486	224.03	165.181	374.24	194.605	1.92344	0.943689	0.00081798	0.00710825
ENSMUSG00000036257	Pnpla8	4231.79	4162.2	2047.76	2319.48	4196.99	2183.62	1.92197	0.942585	9.28416e-10	5.00212e-08
ENSMUSG00000027961	Lrrc39	344.977	411.208	226.729	166.919	378.092	196.824	1.92138	0.942142	0.000688915	0.00614111
ENSMUSG00000078566	Bnip3	5550.69	3851.23	2094.54	2802.85	4700.96	2448.7	1.91976	0.940923	4.77799e-05	0.000639775
ENSMUSG00000029669	Tspan12	3336.63	2346.5	1388.26	1572.69	2841.57	1480.48	1.91938	0.940641	1.03896e-05	0.000177561
ENSMUSG00000024440	Pcdh12	435.936	495.5	265.416	219.951	465.718	242.684	1.91928	0.940565	9.81276e-05	0.00118784
ENSMUSG00000055137	Sugct	168.606	143.524	82.774	79.9822	156.065	81.3781	1.91815	0.939715	0.00631649	0.0363353
ENSMUSG00000026112	Coa5	3977.77	3829.59	2063.95	2020.42	3903.68	2042.18	1.91155	0.934743	1.13258e-10	7.4385e-09
ENSMUSG00000029314	Gpat3	1914.57	2307.78	916.812	1291.89	2111.17	1104.35	1.91145	0.934665	2.36933e-05	0.000358307
ENSMUSG00000021094	Dhrs7	1838.03	3261.19	1349.58	1319.71	2549.61	1334.64	1.91025	0.933758	0.000396668	0.00388456
ENSMUSG00000022853	Ehhadh	1209.08	1123.13	592.014	630.294	1166.11	611.154	1.90801	0.932066	1.61574e-07	4.79115e-06
ENSMUSG00000028614	Ndc1	676.643	736.985	340.093	400.78	706.814	370.437	1.90768	0.931819	9.7639e-06	0.000168134
ENSMUSG00000028475	Spaar	420.406	320.081	195.239	193	370.244	194.119	1.90764	0.931785	0.000463283	0.00440924
ENSMUSG00000025971	Maip1	322.792	306.412	166.448	163.442	314.602	164.945	1.90745	0.931642	0.000269727	0.00283347
ENSMUSG00000034875	Nudt19	661.113	764.323	358.987	388.609	712.718	373.798	1.90641	0.930855	7.54702e-06	0.00013562
ENSMUSG00000037940	Inpp4b	400.44	291.604	198.837	164.311	346.022	181.574	1.90638	0.930834	0.00125617	0.0100179
ENSMUSG00000023959	Clic5	1008.31	1073.01	596.512	495.542	1040.66	546.027	1.90609	0.930619	2.02878e-06	4.41719e-05
ENSMUSG00000001627	Ifrd1	1625.05	1553.7	893.419	775.479	1589.38	834.449	1.9049	0.929712	1.07732e-07	3.4228e-06
ENSMUSG00000026260	Ndufa10	2900.69	3384.21	1627.59	1678.76	3142.45	1653.17	1.90078	0.926595	1.44652e-08	5.98722e-07
ENSMUSG00000025465	Echs1	5124.74	6032.57	2828.71	3043.67	5578.65	2936.19	1.8999	0.925925	9.73353e-09	4.2269e-07
ENSMUSG00000021033	Gstz1	8339.35	9263	4371.72	4895.43	8801.17	4633.58	1.89939	0.925534	1.61476e-09	8.30584e-08
ENSMUSG00000027314	Dll4	457.011	834.945	382.38	298.194	645.978	340.287	1.89828	0.924693	0.00352207	0.0229238
ENSMUSG00000032058	Ppp2r1b	4580.1	4503.92	2220.5	2571.6	4542.01	2396.05	1.89555	0.922619	4.14648e-09	1.94983e-07
ENSMUSG00000050064	Zfp697	174.152	269.962	117.863	116.496	222.057	117.179	1.89454	0.921848	0.0068405	0.0387328
ENSMUSG00000044080	S100a1	2053.22	2172.23	1044.57	1185.82	2112.72	1115.2	1.89434	0.921692	3.25637e-08	1.18708e-06
ENSMUSG00000024799	Tm7sf2	226.287	240.346	147.554	99.1083	233.316	123.331	1.8926	0.920366	0.00472227	0.0288787
ENSMUSG00000024997	Prdx3	3255.65	3940.08	1925.39	1880.45	3597.86	1902.92	1.89066	0.918892	5.02995e-08	1.76481e-06
ENSMUSG00000018574	Acadvl	2176.35	2774.8	1275.8	1344.05	2475.57	1309.92	1.88974	0.918191	7.86609e-07	1.92767e-05
ENSMUSG00000030278	Cidec	20435.7	23066.4	9932.88	13088.4	21751	11510.6	1.88962	0.918098	6.06338e-07	1.54938e-05
ENSMUSG00000025525	Apool	491.398	452.215	276.213	223.428	471.806	249.821	1.8891	0.917699	0.000131327	0.00153479
ENSMUSG00000062908	Acadm	6042.09	5838.92	3095.03	3194.94	5940.51	3144.98	1.88888	0.917529	6.46044e-11	4.50361e-09
ENSMUSG00000039943	Plcb4	1603.98	1431.82	810.645	798.083	1517.9	804.364	1.88718	0.916229	9.28705e-08	3.0106e-06
ENSMUSG00000063229	Ldha	14941.6	23847.8	12514.2	8041.68	19394.7	10277.9	1.88703	0.916118	0.000663018	0.00595505
ENSMUSG00000071037	Camkmt	170.825	156.054	85.4731	87.8065	163.439	86.6398	1.88649	0.915706	0.00582411	0.0340701
ENSMUSG00000053768	Chchd3	1792.55	2101.6	1114.75	950.223	1947.08	1032.49	1.88588	0.915235	7.42936e-07	1.85082e-05
ENSMUSG00000031604	Msmo1	465.885	643.58	311.302	277.329	554.733	294.316	1.88473	0.91436	0.000304477	0.00313633
ENSMUSG00000055900	Tmem69	343.868	322.36	186.241	167.789	333.114	177.015	1.88219	0.912414	0.000329472	0.00335079
ENSMUSG00000048960	Prex2	1381.02	1466	770.158	743.312	1423.51	756.735	1.88112	0.911592	6.11386e-08	2.08081e-06
ENSMUSG00000041633	Kctd12b	1396.55	998.973	617.206	656.375	1197.76	636.791	1.88104	0.91153	4.11526e-05	0.000564836
ENSMUSG00000025651	Uqcrc1	5126.96	6760.44	3222.79	3099.31	5943.7	3161.05	1.88026	0.910935	7.05811e-07	1.76943e-05
ENSMUSG00000025584	Pde8a	1095.94	1286.02	568.621	698.105	1190.98	633.363	1.88008	0.910797	8.07924e-06	0.000143316
ENSMUSG00000026858	Miga2	1899.04	2229.18	1006.78	1189.3	2064.11	1098.04	1.87961	0.910435	8.53591e-07	2.07129e-05
ENSMUSG00000033400	Agl	1402.09	1795.19	1028.38	674.632	1598.64	851.504	1.87759	0.908882	0.000273815	0.00286129
ENSMUSG00000038301	Snx10	1683.84	1697.23	861.029	940.66	1690.54	900.844	1.8765	0.908046	3.80605e-08	1.37173e-06
ENSMUSG00000032735	Ablim3	1567.37	1995.67	899.717	998.908	1781.52	949.312	1.87645	0.908008	3.25647e-06	6.58504e-05
ENSMUSG00000019838	Slc16a10	890.728	948.853	423.767	556.398	919.791	490.082	1.87642	0.907983	2.64046e-05	0.000390396
ENSMUSG00000051910	Sox6	1047.13	678.892	443.56	477.285	863.012	460.423	1.87454	0.906538	0.000386752	0.00379916
ENSMUSG00000062078	Qk	6218.46	6038.26	3221.89	3317.52	6128.36	3269.7	1.87428	0.906336	8.88766e-11	5.96036e-09
ENSMUSG00000055296	Tmem245	5008.27	4269.27	2321.27	2628.98	4638.77	2475.12	1.87414	0.906228	6.82246e-08	2.29252e-06
ENSMUSG00000056938	Acbd4	2654.44	2649.5	1282.1	1548.35	2651.97	1415.22	1.87375	0.905932	1.28036e-07	3.99805e-06
ENSMUSG00000056602	Fry	2961.7	3900.21	1624.89	2040.41	3430.95	1832.65	1.87199	0.90457	1.2414e-05	0.000206389
ENSMUSG00000031357	Syap1	3246.78	3401.29	1735.55	1817.86	3324.03	1776.7	1.87085	0.903691	1.29935e-09	6.8158e-08
ENSMUSG00000024866	Acy3	250.691	333.75	163.748	148.662	292.221	156.205	1.87061	0.903511	0.00180522	0.0135146
ENSMUSG00000074771	Ankef1	2905.13	2041.23	1307.29	1342.31	2473.18	1324.8	1.86691	0.900655	1.86173e-05	0.00029153
ENSMUSG00000026005	Rpe	1254.56	1370.31	729.67	676.371	1312.44	703.021	1.86689	0.900639	3.05698e-07	8.3019e-06
ENSMUSG00000027221	Chst1	2536.86	3237.26	1228.11	1866.54	2887.06	1547.33	1.86566	0.899685	0.000174966	0.00196531
ENSMUSG00000025745	Hadha	5886.79	7582.85	3549.38	3673.09	6734.82	3611.24	1.86492	0.899113	3.90242e-07	1.03548e-05
ENSMUSG00000111080	Gm20300	479.196	373.618	223.13	234.73	426.407	228.93	1.86278	0.897456	0.000368037	0.0036537
ENSMUSG00000025759	Mfsd8	1023.84	1102.63	527.234	614.645	1063.23	570.94	1.86198	0.896839	2.55977e-06	5.34624e-05
ENSMUSG00000087380	2210408F21Rik	176.371	184.531	107.066	86.9371	180.451	97.0017	1.86079	0.895914	0.00610855	0.0353695
ENSMUSG00000072704	Smim10l1	2675.51	2778.22	1549.31	1386.65	2726.86	1467.98	1.85763	0.893466	1.71883e-08	6.91838e-07
ENSMUSG00000025545	Clybl	1139.2	1107.19	627.103	582.479	1123.19	604.791	1.8573	0.893204	4.53137e-07	1.18848e-05
ENSMUSG00000017314	Mpp2	271.766	496.639	201.537	212.127	384.203	206.832	1.85709	0.893047	0.00717934	0.0403166
ENSMUSG00000014313	Cox6c	3806.95	4053.98	2323.07	1915.22	3930.47	2119.15	1.85482	0.891276	1.44249e-07	4.40058e-06
ENSMUSG00000019179	Mdh2	4780.87	6386.82	3142.71	2881.97	5583.85	3012.34	1.85364	0.890361	2.63437e-06	5.47328e-05
ENSMUSG00000060961	Slc4a4	745.417	623.077	314.001	424.253	684.247	369.127	1.85342	0.89019	0.000244817	0.00260625
ENSMUSG00000074264	Amy1	7054.84	6087.24	3387.43	3709.61	6571.04	3548.52	1.85176	0.8889	2.25585e-08	8.63963e-07
ENSMUSG00000027075	Slc43a1	1087.07	858.866	461.555	589.434	972.966	525.494	1.8514	0.888618	9.41827e-05	0.00114825
ENSMUSG00000027219	Slc28a2	1016.07	817.859	457.056	533.794	916.967	495.425	1.85082	0.888165	3.40718e-05	0.000483948
ENSMUSG00000045414	Dipk2a	930.661	1268.93	580.317	608.56	1099.8	594.439	1.84993	0.887469	4.92117e-05	0.000655634
ENSMUSG00000045438	Cox19	735.433	1043.4	475.95	485.979	889.415	480.964	1.849	0.886747	0.000148644	0.00171323
ENSMUSG00000038323	1700066M21Rik	211.867	201.617	116.963	106.933	206.742	111.948	1.8471	0.88526	0.00327638	0.0216617
ENSMUSG00000035878	Hykk	231.833	225.538	104.367	143.446	228.686	123.907	1.84492	0.883561	0.00475247	0.0289853
ENSMUSG00000030972	Acsm5	170.825	176.557	95.37	93.0227	173.691	94.1964	1.84394	0.882794	0.00589769	0.0343488
ENSMUSG00000031379	Pir	167.497	205.034	92.6708	109.541	186.266	101.106	1.84156	0.880926	0.00739898	0.0412774
ENSMUSG00000068196	Col8a1	904.039	772.296	316.7	593.781	838.168	455.24	1.84079	0.880328	0.00375059	0.0240759
ENSMUSG00000025911	Adhfe1	2658.87	2617.61	1298.29	1568.35	2638.24	1433.32	1.84053	0.88012	2.95811e-07	8.09229e-06
ENSMUSG00000024782	Ak3	4056.53	5017.65	2259.19	2674.19	4537.09	2466.69	1.83925	0.879115	1.6985e-06	3.79689e-05
ENSMUSG00000041132	N4bp2l1	890.728	823.555	392.277	539.88	857.142	466.078	1.83873	0.878708	0.000120149	0.00141665
ENSMUSG00000031996	Aplp2	23880	30605.9	14183.1	15453.9	27242.9	14818.5	1.83842	0.878468	4.64115e-07	1.21526e-05
ENSMUSG00000075700	Selenot	4575.66	4229.4	2484.12	2310.79	4402.53	2397.45	1.8364	0.876878	5.52255e-09	2.52955e-07
ENSMUSG00000037152	Ndufc1	1016.07	1106.05	634.3	522.492	1061.06	578.396	1.83467	0.875522	9.44305e-06	0.000162962
ENSMUSG00000046603	Tcaim	390.456	361.088	216.832	193	375.772	204.916	1.83416	0.875116	0.000348007	0.00349634
ENSMUSG00000032459	Mrps22	353.851	437.407	242.924	188.654	395.629	215.789	1.83365	0.874721	0.00116073	0.00941761
ENSMUSG00000029776	Hibadh	4669.95	4696.43	2565.09	2546.39	4683.19	2555.74	1.83242	0.873751	5.84084e-10	3.33936e-08
ENSMUSG00000025428	Atp5a1	17537.3	23031.1	12072.4	10067.3	20284.2	11069.9	1.83238	0.873718	4.59073e-06	8.85498e-05
ENSMUSG00000027833	Shox2	289.514	271.101	167.347	139.099	280.308	153.223	1.82994	0.871797	0.00158658	0.0121704
ENSMUSG00000067719	Gm10221	630.054	757.488	390.477	367.744	693.771	379.111	1.82993	0.871786	4.21205e-05	0.000575582
ENSMUSG00000025006	Sorbs1	5917.85	6034.84	2976.26	3557.47	5976.35	3266.87	1.82932	0.871306	5.91408e-08	2.0302e-06
ENSMUSG00000019082	Slc25a22	1469.76	2279.3	943.803	1105.84	1874.53	1024.82	1.82894	0.871006	0.000317289	0.00324935
ENSMUSG00000021416	Eci3	413.751	400.956	196.138	249.51	407.353	222.824	1.82769	0.870024	0.000534935	0.00496337
ENSMUSG00000022364	Tbc1d31	307.262	382.731	185.342	192.131	344.997	188.736	1.82758	0.869937	0.00090907	0.00771836
ENSMUSG00000063694	Cycs	1829.15	2990.08	1479.13	1158	2409.62	1318.57	1.82744	0.869828	0.000754274	0.00662344
ENSMUSG00000056569	Mpz	631.164	793.939	502.942	277.329	712.551	390.136	1.82677	0.869296	0.00466308	0.0285937
ENSMUSG00000019948	Actr6	268.439	244.902	142.155	139.099	256.67	140.627	1.82537	0.868192	0.00166658	0.0126679
ENSMUSG00000040105	Plpp6	840.812	1074.15	545.228	504.235	957.482	524.732	1.82464	0.867611	3.86628e-05	0.000536717
ENSMUSG00000020993	Trappc6b	1417.62	1409.04	754.863	795.475	1413.33	775.169	1.82319	0.866467	2.06237e-07	5.90619e-06
ENSMUSG00000032263	Bckdhb	1244.58	1116.3	676.587	618.992	1180.44	647.79	1.82245	0.865881	2.06804e-06	4.49035e-05
ENSMUSG00000033446	Lpar6	1465.32	1257.54	610.908	883.281	1361.43	747.094	1.8221	0.865603	0.000181463	0.00202398
ENSMUSG00000030022	Adamts9	1473.09	1235.9	860.129	628.555	1354.49	744.342	1.82003	0.863965	0.000100831	0.00121502
ENSMUSG00000007655	Cav1	26756.2	27607.9	14543	15327.9	27182.1	14935.5	1.81996	0.863908	1.3434e-10	8.54083e-09
ENSMUSG00000005514	Por	4925.07	7273.02	2961.87	3740.9	6099.05	3351.39	1.81978	0.863768	0.000135485	0.00157649
ENSMUSG00000051098	Mblac2	231.833	289.326	141.256	145.185	260.58	143.22	1.81907	0.863202	0.00265557	0.0183511
ENSMUSG00000026107	Nabp1	4044.33	5288.75	2337.46	2799.38	4666.54	2568.42	1.8168	0.861396	1.0891e-05	0.000183564
ENSMUSG00000058267	Mrps14	704.374	842.919	455.257	396.433	773.647	425.845	1.81679	0.861391	5.26476e-05	0.000695001
ENSMUSG00000033082	Clec1a	206.321	230.094	109.765	130.406	218.207	120.086	1.8165	0.861164	0.00442246	0.0273717
ENSMUSG00000036298	Slc2a13	753.181	427.155	279.812	370.352	590.168	325.082	1.81547	0.860339	0.00635948	0.0364769
ENSMUSG00000025521	Tmem192	334.994	526.255	219.531	254.726	430.624	237.128	1.81545	0.860331	0.0035588	0.0231249
ENSMUSG00000039518	Cdsn	1718.23	1461.44	738.668	1012.82	1589.83	875.743	1.81526	0.860175	7.61392e-05	0.000956646
ENSMUSG00000020424	Castor1	185.245	246.041	114.264	123.451	215.643	118.857	1.81374	0.85897	0.00666744	0.0379557
ENSMUSG00000032744	Heyl	320.573	459.049	243.823	186.045	389.811	214.934	1.81374	0.858964	0.00359636	0.0233118
ENSMUSG00000021388	Aspn	929.552	750.654	553.326	373.83	840.103	463.578	1.81269	0.858129	0.00081368	0.00709146
ENSMUSG00000039004	Bmp6	508.037	498.917	293.308	262.55	503.477	277.929	1.81178	0.85741	9.84263e-05	0.00119055
ENSMUSG00000005360	Slc1a3	3622.81	3516.34	1758.95	2184.73	3569.58	1971.84	1.81018	0.856135	8.33809e-07	2.0326e-05
ENSMUSG00000019917	Septin10	703.265	829.25	376.082	470.33	766.258	423.206	1.81018	0.856133	0.000121834	0.00143439
ENSMUSG00000062960	Kdr	4296.13	5219.26	2882.69	2374.25	4757.7	2628.47	1.81009	0.85606	3.27455e-06	6.60964e-05
ENSMUSG00000048495	Tyw5	194.119	197.061	92.6708	123.451	195.59	108.061	1.80928	0.855415	0.00838291	0.0455619
ENSMUSG00000020601	Trib2	762.055	765.462	421.068	423.384	763.758	422.226	1.80887	0.85509	6.9601e-06	0.000126283
ENSMUSG00000003123	Lipe	17883.3	25583.7	11327.4	12722.4	21733.5	12024.9	1.80736	0.853883	2.50909e-05	0.00037516
ENSMUSG00000002688	Prkd1	856.342	882.787	439.962	522.492	869.564	481.227	1.80669	0.853352	1.72384e-05	0.00027344
ENSMUSG00000031782	Coq9	2035.48	2467.25	1224.51	1268.41	2251.36	1246.46	1.80609	0.852874	1.24726e-06	2.87304e-05
ENSMUSG00000059534	Uqcr10	1977.79	2680.25	1369.37	1211.03	2329.02	1290.2	1.80514	0.852111	3.17022e-05	0.000455996
ENSMUSG00000018326	Ywhab	13098	11598.1	6533.74	7169.7	12348.1	6851.72	1.80218	0.849743	2.064e-08	8.14026e-07
ENSMUSG00000023921	Mmut	2617.83	2901.24	1571.81	1490.97	2759.53	1531.39	1.80198	0.849582	7.57695e-08	2.51415e-06
ENSMUSG00000050234	Gja4	208.539	269.962	141.256	124.32	239.251	132.788	1.80171	0.849365	0.00526128	0.0314372
ENSMUSG00000051950	B3glct	621.18	903.29	457.956	388.609	762.235	423.282	1.80073	0.84858	0.0007638	0.00669969
ENSMUSG00000035311	Gnptab	1632.82	2367.01	1077.86	1144.09	1999.91	1110.98	1.8	0.847996	0.000106246	0.00127448
ENSMUSG00000032018	Sc5d	2266.2	3936.66	1721.16	1724.83	3101.43	1723	1.79995	0.847954	0.000911432	0.00772602
ENSMUSG00000021371	Mcur1	2689.93	3569.88	1677.07	1801.34	3129.9	1739.2	1.79952	0.847611	1.0429e-05	0.000178044
ENSMUSG00000025509	Pnpla2	35195.4	37458.6	18160.8	22241.1	36327	20201	1.79827	0.846609	1.71263e-07	5.0502e-06
ENSMUSG00000032898	Fbxo21	2319.44	1756.46	909.614	1357.09	2037.95	1133.35	1.79806	0.846444	0.000551154	0.00509898
ENSMUSG00000059588	Calcrl	816.409	789.382	393.176	499.888	802.895	446.532	1.79776	0.846204	7.34015e-05	0.000926643
ENSMUSG00000003865	Gys1	2100.92	3387.62	1544.81	1509.23	2744.27	1527.02	1.79706	0.845642	0.000403334	0.00393529
ENSMUSG00000075704	Txnrd2	400.44	547.897	256.419	271.244	474.168	263.832	1.79686	0.845482	0.000959208	0.00803248
ENSMUSG00000074093	Svip	412.641	463.605	262.717	225.167	438.123	243.942	1.79619	0.844938	0.000404709	0.00394144
ENSMUSG00000045410	Akr1e1	569.046	575.235	311.302	326.014	572.14	318.658	1.79536	0.844274	4.67744e-05	0.000628962
ENSMUSG00000022474	Pmm1	804.207	1566.23	683.785	637.249	1185.22	660.517	1.79425	0.843379	0.00501397	0.0302092
ENSMUSG00000026640	Plxna2	1150.29	1337.28	658.593	727.664	1243.79	693.128	1.79424	0.843374	6.54678e-06	0.000120314
ENSMUSG00000039763	Dnajc28	309.481	350.837	172.746	195.609	330.159	184.177	1.79218	0.841712	0.00113862	0.00926161
ENSMUSG00000028416	Bag1	3413.16	4860.45	2375.25	2242.11	4136.81	2308.68	1.79181	0.841418	4.16828e-05	0.000571126
ENSMUSG00000051285	Pcmtd1	2683.28	2830.61	1564.61	1518.79	2756.95	1541.7	1.78825	0.838549	2.98607e-08	1.09862e-06
ENSMUSG00000039246	Lyplal1	428.171	375.896	215.032	234.73	402.034	224.881	1.78773	0.83813	0.000496605	0.00467874
ENSMUSG00000070730	Rmdn3	695.5	1018.34	492.145	466.852	856.919	479.499	1.78696	0.837504	0.000548223	0.00507481
ENSMUSG00000021993	Mipep	607.869	680.031	389.577	331.23	643.95	360.404	1.78691	0.837465	0.000106696	0.00127891
ENSMUSG00000022337	Emc2	1281.18	1352.09	783.653	690.281	1316.64	736.967	1.78668	0.837277	2.56356e-06	5.34713e-05
ENSMUSG00000004789	Dlst	4043.22	5140.67	2592.98	2547.26	4591.94	2570.12	1.78662	0.837236	2.10277e-06	4.54713e-05
ENSMUSG00000017309	Cd300lg	3590.64	3422.93	1973.98	1956.95	3506.79	1965.47	1.78423	0.835298	1.16699e-08	4.93301e-07
ENSMUSG00000021906	Oxnad1	407.095	402.095	223.13	230.383	404.595	226.757	1.78421	0.835288	0.000300104	0.00309329
ENSMUSG00000066361	Serpina3c	1706.03	1878.34	981.591	1027.6	1792.19	1004.59	1.78389	0.835025	4.47109e-07	1.1746e-05
ENSMUSG00000031985	Gnpat	5139.16	4256.74	2403.14	2865.45	4697.95	2634.3	1.78336	0.834595	3.57118e-06	7.12174e-05
ENSMUSG00000020377	Ltc4s	276.203	404.373	187.141	194.739	340.288	190.94	1.78174	0.833284	0.00417172	0.0261766
ENSMUSG00000079317	Trappc2	353.851	312.108	179.943	193.87	332.979	186.907	1.78152	0.833111	0.00106591	0.00875985
ENSMUSG00000034911	Ushbp1	1920.11	1880.62	1094.96	1038.9	1900.37	1066.93	1.78123	0.83287	1.50928e-07	4.5347e-06
ENSMUSG00000024359	Hspa9	7507.41	9995.43	5211.16	4615.49	8751.42	4913.33	1.78115	0.832812	1.05592e-05	0.00017988
ENSMUSG00000051984	Sec31b	259.565	309.83	155.651	164.311	284.697	159.981	1.77921	0.831235	0.00233005	0.0165247
ENSMUSG00000083327	Vcp-rs	997.216	1467.13	699.98	685.065	1232.18	692.522	1.77911	0.831158	0.000331346	0.00336512
ENSMUSG00000024410	Rmc1	800.879	804.19	431.864	470.33	802.535	451.097	1.77893	0.831007	1.36339e-05	0.000223399
ENSMUSG00000020572	Nampt	2006.63	2754.29	1309.09	1371	2380.46	1340.04	1.7763	0.828872	4.27894e-05	0.000582771
ENSMUSG00000045435	Tmem60	241.817	283.631	138.556	157.356	262.724	147.956	1.77518	0.827962	0.00339073	0.022242
ENSMUSG00000027559	Car3	224370	189890	111003	122396	207130	116700	1.7749	0.827736	1.2846e-07	3.99838e-06
ENSMUSG00000028369	Svep1	3231.25	2495.72	1354.97	1872.63	2863.49	1613.8	1.77431	0.82726	0.000200458	0.00220033
ENSMUSG00000071528	Atp5md	1454.23	1881.76	1061.67	819.817	1667.99	940.742	1.77313	0.8263	0.000162196	0.00183745
ENSMUSG00000048911	Rnf24	779.803	732.428	386.878	465.983	756.116	426.431	1.7729	0.826113	7.04042e-05	0.000894488
ENSMUSG00000037818	Abhd18	235.161	254.015	144.854	131.275	244.588	138.065	1.77168	0.825117	0.00341247	0.0223477
ENSMUSG00000029759	Pon3	1784.78	1669.89	905.115	1044.98	1727.34	975.05	1.77144	0.824921	2.09674e-06	4.54028e-05
ENSMUSG00000044968	Napepld	651.13	562.705	329.296	356.442	606.918	342.869	1.77012	0.823848	0.000125752	0.00147506
ENSMUSG00000027955	Gask1b	1629.49	1445.49	904.216	833.727	1537.49	868.971	1.76948	0.823324	2.47071e-06	5.20124e-05
ENSMUSG00000000276	Dgke	950.628	818.998	520.036	480.762	884.813	500.399	1.76845	0.822482	3.00119e-05	0.000435227
ENSMUSG00000059734	Ndufs8	1274.53	1633.44	897.918	746.79	1453.98	822.354	1.76811	0.822209	8.43619e-05	0.00104672
ENSMUSG00000010651	Acaa1b	672.206	733.567	349.99	445.118	702.887	397.554	1.76762	0.821808	0.000207996	0.00227522
ENSMUSG00000032462	Pik3cb	1787	2337.39	1157.94	1175.39	2062.2	1166.66	1.7675	0.821709	2.0846e-05	0.000318889
ENSMUSG00000050052	Tdrp	1074.86	1583.32	677.487	826.772	1329.09	752.129	1.76684	0.821174	0.000658206	0.0059205
ENSMUSG00000039361	Picalm	5740.37	5655.53	3167.9	3282.75	5697.95	3225.32	1.76662	0.820989	4.56427e-09	2.11673e-07
ENSMUSG00000064337	mt-Rnr1	9273.34	6222.79	3799.5	4980.63	7748.06	4390.07	1.7649	0.819588	0.000409487	0.0039772
ENSMUSG00000071253	Slc25a16	1151.4	1358.92	689.183	733.749	1255.16	711.466	1.76402	0.818863	1.08045e-05	0.0001823
ENSMUSG00000026003	Acadl	6678.8	6513.26	3156.21	4326.86	6596.03	3741.53	1.76286	0.817918	1.94401e-05	0.000301445
ENSMUSG00000021930	Spryd7	621.18	612.825	369.784	330.361	617.003	350.072	1.76272	0.817803	7.86461e-05	0.000984253
ENSMUSG00000033526	Ppip5k1	1648.35	2562.93	1184.93	1204.08	2105.64	1194.5	1.76266	0.817756	0.000465472	0.00442477
ENSMUSG00000032840	Spring1	458.121	726.733	317.6	354.703	592.427	336.152	1.76199	0.817203	0.00324172	0.0215301
ENSMUSG00000034158	Lrrc58	6107.53	5153.2	2677.56	3716.56	5630.37	3197.06	1.76106	0.816444	7.07074e-05	0.000897623
ENSMUSG00000031534	Smim19	667.769	643.58	351.789	392.956	655.675	372.373	1.76064	0.816104	6.36271e-05	0.000819521
ENSMUSG00000040957	Cables1	482.524	455.632	254.62	278.199	469.078	266.409	1.76063	0.81609	0.000264075	0.00278317
ENSMUSG00000051177	Plcb1	930.661	1106.05	614.507	542.488	1018.35	578.497	1.76037	0.815883	4.21529e-05	0.000575582
ENSMUSG00000028955	Vamp3	2035.48	2373.84	1336.98	1169.3	2204.66	1253.14	1.75934	0.815032	4.44999e-06	8.61488e-05
ENSMUSG00000033022	Cdo1	18066.4	22518.5	10935.2	12166.9	20292.4	11551	1.75675	0.812907	1.86553e-06	4.11249e-05
ENSMUSG00000005469	Prkaca	3178	4721.49	2261.89	2235.15	3949.74	2248.52	1.75654	0.812737	0.000155708	0.00178173
ENSMUSG00000045160	Bola3	728.778	828.111	466.053	420.776	778.444	443.415	1.75561	0.811973	5.65933e-05	0.000741545
ENSMUSG00000047446	Arl4a	3191.31	2611.91	1498.03	1808.29	2901.61	1653.16	1.75516	0.811599	1.74711e-05	0.000276029
ENSMUSG00000030246	Ldhb	1325.55	1464.86	849.333	740.704	1395.21	795.019	1.75502	0.811486	7.58717e-06	0.000136098
ENSMUSG00000056492	Adgrf5	7456.38	6845.87	3954.26	4198.19	7151.13	4076.22	1.75435	0.810934	2.55054e-08	9.50362e-07
ENSMUSG00000073131	Vma21	1092.61	1168.7	676.587	612.907	1130.65	644.747	1.75372	0.810417	7.02281e-06	0.000127275
ENSMUSG00000000876	Pxmp4	1426.5	1660.78	816.943	943.268	1543.64	880.105	1.75372	0.810415	1.3337e-05	0.00021944
ENSMUSG00000025781	Atp5c1	5420.91	6368.6	3542.19	3182.77	5894.75	3362.48	1.7531	0.809911	7.7061e-07	1.89599e-05
ENSMUSG00000029499	Pxmp2	349.414	391.843	215.932	206.91	370.629	211.421	1.75298	0.809811	0.000855354	0.00736857
ENSMUSG00000021573	Tppp	850.795	764.323	390.477	531.186	807.559	460.831	1.75212	0.809102	0.00043082	0.00413994
ENSMUSG00000020153	Ndufs7	2006.63	2554.96	1368.47	1236.25	2280.8	1302.36	1.75126	0.808394	2.03065e-05	0.000312744
ENSMUSG00000026834	Acvr1c	4180.77	2884.15	1582.6	2453.37	3532.46	2017.98	1.75044	0.80772	0.00187878	0.0139149
ENSMUSG00000101856	1700096K18Rik	246.254	194.783	127.76	124.32	220.518	126.04	1.74997	0.80733	0.00799192	0.0438466
ENSMUSG00000025393	Atp5b	25785.6	32413.7	17553.5	15746.1	29099.6	16649.8	1.74775	0.805499	2.79351e-06	5.76625e-05
ENSMUSG00000057614	Gnai1	4540.16	3813.64	2227.7	2553.34	4176.9	2390.52	1.74726	0.805096	3.18719e-06	6.47947e-05
ENSMUSG00000056999	Ide	1605.09	2892.12	1293.79	1281.45	2248.6	1287.62	1.74623	0.804242	0.00273378	0.0187611
ENSMUSG00000022235	Cmbl	1170.26	1209.7	606.409	756.353	1189.98	681.381	1.74617	0.804198	3.88905e-05	0.000539377
ENSMUSG00000022309	Angpt1	818.627	605.99	417.469	399.041	712.309	408.255	1.74503	0.803255	0.000521662	0.00486864
ENSMUSG00000031545	Gpat4	3209.06	3844.39	1826.43	2217.77	3526.73	2022.1	1.74398	0.802381	1.34988e-05	0.000221642
ENSMUSG00000058076	Sdhc	2706.57	3403.57	1830.92	1676.15	3055.07	1753.54	1.74221	0.800923	1.05006e-05	0.000179074
ENSMUSG00000038663	Fsd2	542.424	571.818	304.104	335.577	557.121	319.841	1.74163	0.800436	0.000168318	0.00189197
ENSMUSG00000020777	Acox1	10431.4	11368	5863.46	6661.12	10899.7	6262.29	1.7405	0.799499	1.47567e-07	4.46749e-06
ENSMUSG00000078185	Chml	723.232	555.871	358.087	377.307	639.551	367.697	1.73948	0.798657	0.000491993	0.00464079
ENSMUSG00000036880	Acaa2	2753.16	3535.7	1769.74	1849.15	3144.43	1809.45	1.7377	0.79718	1.36675e-05	0.000223719
ENSMUSG00000031725	Ces1f	3680.49	3608.6	1704.96	2491.62	3644.55	2098.29	1.73681	0.796437	0.000162076	0.00183741
ENSMUSG00000032342	Mto1	326.12	378.174	190.74	214.735	352.147	202.737	1.73654	0.796215	0.00171717	0.0129718
ENSMUSG00000028557	Rnf11	4340.5	4393.43	2543.5	2490.75	4366.96	2517.12	1.73491	0.794861	2.17905e-08	8.4915e-07
ENSMUSG00000059811	Atl2	2096.48	2040.09	1176.83	1207.56	2068.29	1192.19	1.73485	0.794811	3.01357e-07	8.20165e-06
ENSMUSG00000031298	Adgrg2	376.036	400.956	187.141	260.811	388.496	223.976	1.73393	0.79405	0.0032437	0.0215301
ENSMUSG00000048787	Dcun1d3	818.627	773.435	386.878	531.186	796.031	459.032	1.73384	0.793967	0.000534866	0.00496337
ENSMUSG00000029017	Pmpcb	1642.8	1884.04	978.892	1055.42	1763.42	1017.15	1.73354	0.793722	4.54831e-06	8.78382e-05
ENSMUSG00000011752	Pgam1	2449.23	3878.57	1898.4	1752.65	3163.9	1825.53	1.73309	0.793348	0.000710642	0.00628894
ENSMUSG00000009378	Slc16a12	210.758	269.962	139.456	138.23	240.36	138.843	1.73086	0.79149	0.0076037	0.0422269
ENSMUSG00000021577	Sdha	9901.17	11907.9	6464.47	6141.24	10904.6	6302.85	1.73009	0.790847	7.84113e-07	1.92623e-05
ENSMUSG00000028737	Aldh4a1	825.283	934.045	537.131	479.893	879.664	508.512	1.72993	0.790717	5.78225e-05	0.000755161
ENSMUSG00000026880	Stom	2654.44	2696.2	1507.03	1590.95	2675.32	1548.99	1.72709	0.788345	1.82452e-07	5.30144e-06
ENSMUSG00000073609	D2hgdh	744.307	673.196	402.173	419.906	708.752	411.04	1.72432	0.786023	7.8459e-05	0.000983461
ENSMUSG00000065979	Cpped1	1292.28	1295.13	727.871	772.871	1293.71	750.371	1.72401	0.785769	3.52152e-06	7.04038e-05
ENSMUSG00000028518	Prkaa2	478.087	621.938	368.884	269.505	550.012	319.195	1.72332	0.785187	0.00305628	0.0205397
ENSMUSG00000036934	4921524J17Rik	241.817	224.399	134.958	135.622	233.108	135.29	1.72312	0.785026	0.00550714	0.0325634
ENSMUSG00000070476	Fam217b	280.64	416.903	224.929	179.96	348.772	202.445	1.72279	0.784748	0.00944142	0.0499966
ENSMUSG00000054733	Msra	512.474	760.905	342.792	396.433	636.69	369.613	1.72219	0.784244	0.00272181	0.0187032
ENSMUSG00000032946	Rasgrp2	844.14	995.556	536.231	532.055	919.848	534.143	1.72198	0.78407	5.62878e-05	0.000738151
ENSMUSG00000038690	Atp5j2	2747.61	3151.83	1916.4	1511.84	2949.72	1714.12	1.72091	0.783173	3.19145e-05	0.000458634
ENSMUSG00000055128	Cgrrf1	433.717	646.997	315.801	312.104	540.357	313.952	1.72088	0.783143	0.00310249	0.02078
ENSMUSG00000025656	Arhgef9	276.203	342.863	178.144	181.699	309.533	179.921	1.72008	0.782474	0.00355106	0.0230841
ENSMUSG00000090523	Gypc	770.929	989.86	526.334	497.28	880.395	511.807	1.72007	0.782464	0.000236699	0.00253681
ENSMUSG00000052914	Cyp2j6	496.944	541.063	284.311	319.059	519.004	301.685	1.72005	0.782449	0.000380364	0.00375264
ENSMUSG00000020456	Ogdh	8140.79	9354.12	4993.43	5178.84	8747.46	5086.14	1.71984	0.782271	2.29918e-07	6.52557e-06
ENSMUSG00000044221	Grsf1	1730.43	1805.44	933.906	1122.36	1767.94	1028.13	1.71939	0.781897	1.18477e-05	0.00019801
ENSMUSG00000019763	Rmnd1	429.28	554.732	261.818	310.366	492.006	286.092	1.71927	0.781797	0.00177863	0.0133662
ENSMUSG00000062981	Mrpl42	864.106	1110.6	600.111	548.573	987.355	574.342	1.71905	0.781608	0.000208696	0.00227973
ENSMUSG00000031442	Mcf2l	1193.55	1115.16	587.515	755.484	1154.36	671.499	1.71887	0.78146	0.000125372	0.00147168
ENSMUSG00000050103	Agmo	1134.76	965.94	535.332	686.803	1050.35	611.067	1.71873	0.781345	0.000270418	0.00283698
ENSMUSG00000075706	Gpx4	9996.57	12616.4	6829.75	6329.02	11306.5	6579.39	1.71847	0.781122	5.66426e-06	0.000106416
ENSMUSG00000030168	Adipor2	12993.8	14573.4	7611.61	8432.03	13783.6	8021.82	1.71824	0.780928	2.42519e-07	6.79824e-06
ENSMUSG00000021779	Thrb	576.81	521.699	293.308	346.01	549.254	319.659	1.71808	0.780793	0.000472318	0.00448448
ENSMUSG00000014077	Chp1	9030.41	9296.03	5169.77	5497.03	9163.22	5333.4	1.71806	0.780781	1.94675e-08	7.73543e-07
ENSMUSG00000034473	Sec22a	466.995	522.838	274.414	301.672	494.916	288.043	1.7179	0.78065	0.000486476	0.00459526
ENSMUSG00000020280	Pus10	698.828	766.601	425.566	427.731	732.714	426.648	1.71728	0.780121	6.69317e-05	0.000855843
ENSMUSG00000020658	Efr3b	320.573	374.757	229.428	175.613	347.665	202.52	1.717	0.77989	0.00423261	0.0264646
ENSMUSG00000026096	Osgepl1	319.464	299.578	181.743	179.09	309.521	180.417	1.71571	0.778807	0.00213849	0.0154777
ENSMUSG00000040147	Maob	1195.77	1142.5	659.493	704.191	1169.13	681.842	1.71462	0.77789	8.27938e-06	0.000146376
ENSMUSG00000062929	Cfl2	1937.86	1890.87	1235.31	998.038	1914.37	1116.67	1.71451	0.777797	1.90739e-05	0.000297216
ENSMUSG00000028229	Rmdn1	380.473	416.903	261.818	203.433	398.688	232.625	1.71421	0.777544	0.0023301	0.0165247
ENSMUSG00000021218	Gdi2	6984.95	6686.4	4037.03	3943.47	6835.68	3990.25	1.71311	0.776619	2.40444e-08	9.10625e-07
ENSMUSG00000030545	Pex11a	931.771	1366.9	709.877	632.902	1149.33	671.389	1.7118	0.775511	0.0010179	0.00844388
ENSMUSG00000031246	Sh3bgrl	5570.66	4893.49	3027.55	3099.31	5232.07	3063.43	1.70793	0.772252	4.12737e-07	1.0861e-05
ENSMUSG00000015759	Cnih1	1697.15	1846.45	1084.16	991.953	1771.8	1038.06	1.70688	0.771363	4.05114e-06	7.93131e-05
ENSMUSG00000058254	Tspan7	1921.22	2134.64	1248.81	1127.57	2027.93	1188.19	1.70677	0.771268	4.52877e-06	8.75672e-05
ENSMUSG00000062515	Fabp4	106723	98376.6	59029.5	61195.9	102550	60112.7	1.70596	0.770584	1.71936e-08	6.91838e-07
ENSMUSG00000041028	Ghitm	7693.76	7216.07	4284.45	4456.4	7454.92	4370.42	1.70576	0.770418	4.852e-08	1.70993e-06
ENSMUSG00000033157	Abhd10	275.094	232.372	163.748	133.883	253.733	148.816	1.70564	0.770316	0.00832795	0.0453989
ENSMUSG00000031176	Dynlt3	2205.19	2067.43	1275.8	1229.29	2136.31	1252.54	1.70564	0.770314	9.46767e-07	2.26284e-05
ENSMUSG00000035473	Galm	846.358	836.085	492.145	494.672	841.221	493.409	1.70492	0.769705	2.98406e-05	0.00043393
ENSMUSG00000028088	Fmo5	671.097	574.096	314.001	416.429	622.596	365.215	1.7045	0.769349	0.00134632	0.0105723
ENSMUSG00000000171	Sdhd	2306.13	3260.05	1710.36	1555.31	2783.09	1632.83	1.70441	0.769276	0.000239722	0.00256106
ENSMUSG00000044952	Kctd21	373.818	394.122	196.138	254.726	383.97	225.432	1.70274	0.767862	0.00285891	0.0194768
ENSMUSG00000028719	Cmpk1	2148.62	2161.97	1291.99	1239.72	2155.3	1265.86	1.70267	0.767798	6.46791e-07	1.63436e-05
ENSMUSG00000033788	Dysf	1212.41	1283.74	826.84	639.857	1248.08	733.349	1.70209	0.767303	0.000143979	0.00166429
ENSMUSG00000041650	Pcca	1951.17	2091.35	1160.63	1214.51	2021.26	1187.57	1.70193	0.767175	1.45541e-06	3.29991e-05
ENSMUSG00000030214	Plbd1	1263.44	1431.82	794.45	790.258	1347.63	792.354	1.70072	0.766143	1.22925e-05	0.000204798
ENSMUSG00000033960	Jcad	1907.91	2262.21	1220.92	1231.03	2085.06	1225.97	1.70066	0.766096	8.46295e-06	0.000148425
ENSMUSG00000025137	Pcyt2	898.493	1399.93	726.971	625.947	1149.21	676.459	1.6988	0.764513	0.00242521	0.0170408
ENSMUSG00000050608	Micos10	1778.13	1934.16	1263.2	922.403	1856.14	1092.8	1.69867	0.764402	0.00022152	0.00239187
ENSMUSG00000072964	Bhlhb9	617.853	509.169	343.692	319.929	563.511	331.81	1.69859	0.764335	0.000649522	0.0058623
ENSMUSG00000026773	Pfkfb3	12312.7	9084.16	5816.67	6787.18	10698.4	6301.93	1.69765	0.763535	9.44494e-05	0.00115033
ENSMUSG00000042208	Sanbr	592.34	710.786	369.784	398.172	651.563	383.978	1.6966	0.76265	0.000385234	0.00379363
ENSMUSG00000027999	Pla2g12a	597.886	987.582	515.538	419.037	792.734	467.287	1.6964	0.762477	0.00671026	0.0381585
ENSMUSG00000049969	Plekhf2	778.694	765.462	461.555	451.204	772.078	456.379	1.6918	0.758559	5.80511e-05	0.000757524
ENSMUSG00000029084	Cd38	792.005	576.374	409.371	399.911	684.19	404.641	1.6911	0.757965	0.00130184	0.0103148
ENSMUSG00000044501	Zfp758	310.59	254.015	156.551	177.352	282.303	166.951	1.69092	0.757808	0.00647488	0.0370156
ENSMUSG00000032702	Kank1	1623.94	1164.14	875.425	773.74	1394.04	824.582	1.69081	0.757717	0.000587604	0.00537363
ENSMUSG00000033488	Cryzl2	410.423	355.393	206.035	246.901	382.908	226.468	1.69061	0.757541	0.00267685	0.0184741
ENSMUSG00000000563	Atp5pb	3730.41	5352.54	2869.2	2503.79	4541.47	2686.49	1.69047	0.757422	0.000333974	0.00338964
ENSMUSG00000025791	Pgm1	3460.86	4401.4	2554.3	2097.79	3931.13	2326.04	1.69007	0.757081	9.51632e-05	0.00115636
ENSMUSG00000028199	Cryz	346.086	405.512	224.03	220.82	375.799	222.425	1.6894	0.756508	0.00196866	0.014446
ENSMUSG00000056234	Ncoa4	2013.29	2257.66	1241.61	1286.67	2135.47	1264.14	1.68919	0.75633	3.43683e-06	6.88839e-05
ENSMUSG00000056476	Med12l	341.649	342.863	211.433	193.87	342.256	202.652	1.68907	0.756229	0.00204341	0.0148853
ENSMUSG00000018102	H2bc4	976.141	1276.91	671.189	664.2	1126.52	667.694	1.68705	0.754502	0.000264239	0.00278317
ENSMUSG00000036299	BC031181	1191.34	1492.19	884.422	706.799	1341.76	795.61	1.68653	0.754055	0.000385898	0.00379546
ENSMUSG00000023960	Enpp5	2561.26	2307.78	1324.38	1563.13	2434.52	1443.76	1.68618	0.753755	1.44999e-05	0.000234446
ENSMUSG00000027309	Dnaaf9	3217.94	3793.14	2172.82	1985.64	3505.54	2079.23	1.68597	0.753583	6.62732e-06	0.000121493
ENSMUSG00000001865	Cpa3	1061.55	661.805	465.154	557.267	861.679	511.21	1.68563	0.753291	0.00518522	0.0310761
ENSMUSG00000035948	Acss3	1227.94	1018.34	592.014	740.704	1123.14	666.359	1.68539	0.753079	0.000367359	0.003653
ENSMUSG00000028247	Coq3	373.818	440.824	233.027	250.379	407.321	241.703	1.68489	0.752657	0.00177323	0.0133382
ENSMUSG00000056313	Tcim	1138.09	1145.91	708.077	647.682	1142	677.879	1.68478	0.752557	1.88732e-05	0.000294667
ENSMUSG00000041935	AW549877	2398.2	2157.42	1301.89	1402.3	2277.81	1352.09	1.68464	0.752444	3.90386e-06	7.69615e-05
ENSMUSG00000031231	Cox7b	1864.65	2498	1456.64	1134.53	2181.33	1295.59	1.68369	0.751629	0.000593078	0.00542058
ENSMUSG00000038967	Pdk2	1759.27	2247.4	1081.46	1298.84	2003.34	1190.15	1.68309	0.751109	0.000192676	0.00212814
ENSMUSG00000041992	Rapgef5	1006.09	860.005	523.635	585.087	933.048	554.361	1.68308	0.751107	0.000148575	0.00171323
ENSMUSG00000007891	Ctsd	10451.4	16914.2	8094.75	8166	13682.8	8130.38	1.6829	0.750951	0.00107044	0.00878343
ENSMUSG00000032554	Trf	41279.7	31446.6	21687.7	21587.4	36363.1	21637.5	1.68056	0.748946	2.11842e-05	0.000323752
ENSMUSG00000025732	Mcrip2	606.76	885.065	470.552	417.298	745.913	443.925	1.68017	0.748606	0.00263879	0.0182749
ENSMUSG00000020326	Ccng1	2966.14	3130.19	2127.83	1502.27	3048.16	1815.05	1.67949	0.748021	0.000285823	0.00296146
ENSMUSG00000021752	Kctd6	329.447	479.553	245.623	236.469	404.5	241.046	1.67784	0.746605	0.00680318	0.0385902
ENSMUSG00000031352	Hccs	474.759	517.142	310.402	280.807	495.951	295.605	1.67784	0.746603	0.000736576	0.00649315
ENSMUSG00000022635	Zcrb1	862.997	962.522	546.128	542.488	912.76	544.308	1.67684	0.745742	6.57594e-05	0.000843567
ENSMUSG00000024395	Lims2	1302.26	1445.49	794.45	844.159	1373.88	819.305	1.67675	0.745668	1.77679e-05	0.000280439
ENSMUSG00000049940	Pgrmc2	2450.34	2971.86	1561.91	1671.8	2711.1	1616.85	1.67667	0.745603	1.87146e-05	0.000292766
ENSMUSG00000037455	Slc18b1	908.476	907.847	556.925	526.839	908.161	541.882	1.67602	0.74504	4.29927e-05	0.000585039
ENSMUSG00000013593	Ndufs2	4439.22	5461.89	3194.89	2713.31	4950.55	2954.1	1.67584	0.74488	3.83532e-05	0.000534255
ENSMUSG00000029486	Mrpl1	432.608	452.215	270.815	257.334	442.411	264.074	1.67538	0.744485	0.000873842	0.00749937
ENSMUSG00000030088	Aldh1l1	1936.75	3245.24	1636.59	1458.8	2591	1547.7	1.67405	0.743342	0.00314542	0.0210321
ENSMUSG00000031489	Adrb3	9230.08	7156.84	4121.6	5670.04	8193.46	4895.82	1.67354	0.742904	0.000490565	0.00463008
ENSMUSG00000032114	Slc37a4	387.129	593.461	311.302	274.721	490.295	293.012	1.67315	0.742564	0.00779398	0.0430279
ENSMUSG00000036144	Meox2	595.668	733.567	377.881	416.429	664.618	397.155	1.67314	0.74256	0.000703979	0.00624386
ENSMUSG00000028690	Mmachc	434.826	494.361	284.311	271.244	464.593	277.777	1.67248	0.741992	0.0010344	0.00854951
ENSMUSG00000024645	Timm21	632.273	596.878	373.383	361.658	614.575	367.52	1.67234	0.741865	0.000246026	0.00261124
ENSMUSG00000055737	Ghr	22293.7	17654.6	12301.8	11589.6	19974.2	11945.7	1.67209	0.741655	1.22012e-05	0.00020349
ENSMUSG00000032238	Rora	1297.82	1219.95	733.269	772.871	1258.89	753.07	1.67166	0.741279	1.59437e-05	0.000254427
ENSMUSG00000035133	Arhgap5	3209.06	3091.46	1771.54	1997.82	3150.26	1884.68	1.67146	0.741105	2.34316e-06	4.98556e-05
ENSMUSG00000002550	Uck1	2738.74	2783.91	1750.85	1553.57	2761.33	1652.21	1.67136	0.741026	2.77075e-06	5.72669e-05
ENSMUSG00000013622	Atraid	1580.68	1927.32	1020.28	1079.76	1754	1050.02	1.67032	0.740122	4.90775e-05	0.000654394
ENSMUSG00000053907	Mat2a	4687.69	4277.24	2614.58	2756.78	4482.47	2685.68	1.66903	0.739008	7.87127e-07	1.92767e-05
ENSMUSG00000020154	Ptprb	6367.1	6062.18	3819.3	3627.89	6214.64	3723.59	1.66902	0.739	1.92194e-07	5.55406e-06
ENSMUSG00000060675	Plaat3	9043.72	8390.46	5161.68	5289.25	8717.09	5225.47	1.6682	0.738292	1.51429e-07	4.53712e-06
ENSMUSG00000028007	Snx7	411.532	577.513	307.703	285.154	494.523	296.428	1.6681	0.738208	0.0041423	0.0260228
ENSMUSG00000024695	Zfp91	2366.03	2638.11	1435.05	1565.74	2502.07	1500.39	1.66751	0.737695	5.92584e-06	0.000110676
ENSMUSG00000038084	Opa1	2310.57	2438.77	1410.76	1438.81	2374.67	1424.78	1.66665	0.73695	1.51196e-06	3.4135e-05
ENSMUSG00000032527	Pccb	3285.6	3620	2065.75	2078.67	3452.8	2072.21	1.66621	0.736566	1.16494e-06	2.71091e-05
ENSMUSG00000028647	Mycbp	350.523	411.208	204.236	252.987	380.866	228.611	1.66547	0.735927	0.00433277	0.026953
ENSMUSG00000066735	Vkorc1l1	1376.58	1735.96	903.316	965.871	1556.27	934.594	1.66503	0.735546	0.000130364	0.00152466
ENSMUSG00000020349	Ppp2ca	4188.53	4803.5	2848.5	2552.47	4496.02	2700.49	1.6649	0.735435	5.717e-06	0.000107153
ENSMUSG00000036473	Tbc1d24	561.281	694.839	337.394	417.298	628.06	377.346	1.66399	0.734646	0.00178368	0.0133853
ENSMUSG00000031617	Tmem184c	727.669	692.561	445.36	408.604	710.115	426.982	1.66328	0.734033	0.000194548	0.00214583
ENSMUSG00000001156	Mxd1	488.07	563.844	349.99	282.546	525.957	316.268	1.6632	0.73396	0.00185332	0.0137648
ENSMUSG00000017756	Slc12a7	1433.15	1727.98	902.416	998.908	1580.57	950.662	1.66243	0.733292	7.96975e-05	0.000993499
ENSMUSG00000032437	Stt3b	5851.3	6512.12	3675.34	3771.33	6181.71	3723.34	1.66023	0.731384	6.99111e-07	1.7554e-05
ENSMUSG00000004056	Akt2	5286.69	6661.34	3551.18	3647.88	5974.01	3599.53	1.65962	0.730856	2.23782e-05	0.000340688
ENSMUSG00000030802	Bckdk	1386.56	1824.81	1023.88	911.97	1605.68	967.924	1.65886	0.730196	0.000342758	0.00345453
ENSMUSG00000024924	Vldlr	2280.62	2401.18	1269.5	1552.7	2340.9	1411.1	1.65878	0.730125	3.60341e-05	0.000508187
ENSMUSG00000033793	Atp6v1h	1496.38	1765.57	1023.88	944.137	1630.98	984.008	1.65747	0.728982	4.90424e-05	0.000654394
ENSMUSG00000029195	Klb	2011.07	1158.44	857.43	1055.42	1584.76	956.423	1.657	0.728577	0.0078506	0.0432354
ENSMUSG00000086922	Gm13835	823.064	949.993	571.32	499.019	886.528	535.17	1.65659	0.728221	0.000280941	0.0029223
ENSMUSG00000052428	Tmco1	1834.7	1745.07	1105.75	1055.42	1789.89	1080.58	1.65648	0.728118	5.59063e-06	0.000105406
ENSMUSG00000049090	Zadh2	1372.14	2057.18	1067.06	1003.25	1714.66	1035.16	1.65634	0.727996	0.00147228	0.0114093
ENSMUSG00000025915	Sgk3	589.012	592.321	348.19	365.136	590.667	356.663	1.656	0.727705	0.000346931	0.00348803
ENSMUSG00000032047	Acat1	4952.8	4868.43	3058.14	2876.75	4910.62	2967.44	1.65486	0.72671	3.88821e-07	1.03343e-05
ENSMUSG00000034424	Gcsh	1304.48	1231.35	765.659	766.785	1267.91	766.222	1.6548	0.726654	1.79891e-05	0.000283649
ENSMUSG00000028393	Alad	835.266	1289.44	645.997	638.988	1062.35	642.492	1.65332	0.725367	0.00318116	0.0211997
ENSMUSG00000093930	Hmgcs1	3324.42	2103.88	1696.87	1587.47	2714.15	1642.17	1.65288	0.724983	0.00201453	0.0147078
ENSMUSG00000017778	Cox7c	2962.81	3282.83	2108.04	1670.93	3122.82	1889.48	1.65281	0.724917	7.34645e-05	0.000926703
ENSMUSG00000050312	Nsun3	371.599	353.115	217.731	220.82	362.357	219.276	1.65255	0.724695	0.0023269	0.0165247
ENSMUSG00000070738	Dgkd	3720.43	4035.76	2081.95	2611.59	3878.09	2346.77	1.65243	0.724588	4.45805e-05	0.000603545
ENSMUSG00000016257	Prelid3b	749.854	1047.95	609.108	479.024	898.903	544.066	1.65223	0.724411	0.00316844	0.0211545
ENSMUSG00000006423	Steep1	1517.46	1402.21	873.625	893.714	1459.83	883.669	1.65204	0.724246	1.4784e-05	0.000238313
ENSMUSG00000022365	Derl1	4326.08	5591.74	2986.16	3019.33	4958.91	3002.74	1.65142	0.723703	5.41073e-05	0.000710806
ENSMUSG00000000399	Ndufa9	1783.68	2097.05	1193.02	1157.13	1940.36	1175.08	1.65121	0.723524	2.62923e-05	0.000389097
ENSMUSG00000030546	Plin1	28401.3	29584.2	15974.5	19151.4	28992.7	17562.9	1.65078	0.723146	3.71913e-06	7.37056e-05
ENSMUSG00000010476	Ebf3	881.854	1039.98	656.793	507.713	960.917	582.253	1.65049	0.722892	0.0009556	0.00800649
ENSMUSG00000026914	Psmd14	1070.43	1329.31	795.35	658.983	1199.87	727.167	1.6501	0.722557	0.000522954	0.00487784
ENSMUSG00000039770	Ypel5	1478.63	1417.02	847.533	907.624	1447.82	877.578	1.64975	0.722246	1.55723e-05	0.000249251
ENSMUSG00000024758	Rtn3	5622.79	6258.1	3433.32	3769.59	5940.45	3601.46	1.64941	0.721949	2.45159e-06	5.1747e-05
ENSMUSG00000032251	Irak1bp1	325.01	382.731	220.431	208.649	353.871	214.54	1.64935	0.7219	0.00386466	0.024639
ENSMUSG00000008090	Fgfrl1	3343.28	4342.17	2107.14	2552.47	3842.73	2329.81	1.64928	0.721834	0.000255002	0.00269661
ENSMUSG00000021666	Gfm2	821.955	901.012	558.724	486.848	861.483	522.786	1.64797	0.720694	0.000239996	0.00256178
ENSMUSG00000028861	Mrps15	876.308	1158.44	673.888	561.614	1017.38	617.751	1.64691	0.719766	0.00127993	0.0101716
ENSMUSG00000055239	Kcmf1	1647.24	1999.09	1128.25	1085.84	1823.16	1107.04	1.64682	0.719679	6.13919e-05	0.000795891
ENSMUSG00000008226	Scrn3	474.759	478.414	286.11	292.978	476.586	289.544	1.64594	0.718908	0.000886991	0.00757541
ENSMUSG00000048486	Fitm2	3516.33	3483.31	1885.81	2367.3	3499.82	2126.55	1.64568	0.718686	4.23297e-05	0.000577005
ENSMUSG00000028300	C9orf72	1694.94	1333.86	732.37	1109.32	1514.4	920.844	1.64446	0.71761	0.00376487	0.0241481
ENSMUSG00000023951	Vegfa	4308.33	5621.36	3124.72	2920.22	4964.84	3022.47	1.64262	0.716001	9.42066e-05	0.00114825
ENSMUSG00000052738	Suclg1	1885.73	2492.31	1381.07	1285.8	2189.02	1333.43	1.64159	0.715095	0.000259874	0.00274448
ENSMUSG00000113902	Ndufb1	721.013	731.289	486.747	398.172	726.151	442.459	1.64142	0.714948	0.000626917	0.00569059
ENSMUSG00000000340	Dbt	1722.67	1620.91	986.09	1051.07	1671.79	1018.58	1.64127	0.714811	1.30758e-05	0.000215812
ENSMUSG00000023150	Ivns1abp	4658.85	4424.19	2211.5	3322.74	4541.52	2767.12	1.64117	0.714724	0.000973645	0.00813623
ENSMUSG00000052962	Mrpl35	493.617	562.705	346.391	297.325	528.161	321.858	1.64109	0.714652	0.00155439	0.0119639
ENSMUSG00000026887	Mrrf	613.416	631.05	345.491	412.951	622.233	379.221	1.64053	0.71416	0.000817162	0.00710725
ENSMUSG00000022295	Atp6v1c1	843.031	1110.6	587.515	603.344	976.817	595.429	1.64034	0.713995	0.000786662	0.00687367
ENSMUSG00000026150	Mff	1602.87	1651.67	1031.98	952.831	1627.27	992.403	1.63978	0.713504	1.40763e-05	0.000228529
ENSMUSG00000033278	Ptprm	1464.21	1784.94	901.516	1080.63	1624.57	991.072	1.63901	0.712822	0.000292057	0.00301622
ENSMUSG00000021662	Arhgef28	724.341	734.706	399.474	491.195	729.524	445.335	1.63787	0.711818	0.000691588	0.0061605
ENSMUSG00000024143	Rhoq	2843.01	3320.42	1777.84	1987.38	3081.71	1882.61	1.63684	0.710911	2.71032e-05	0.000399609
ENSMUSG00000033377	Palmd	1541.86	1913.65	1065.26	1045.85	1727.76	1055.56	1.63674	0.710821	0.000118146	0.00139511
ENSMUSG00000000686	Abhd15	444.81	454.493	233.027	316.451	449.651	274.739	1.63619	0.710339	0.00500137	0.0301562
ENSMUSG00000001348	Acp5	5132.5	5882.21	3292.06	3441.84	5507.36	3366.95	1.63567	0.70988	4.06924e-06	7.94261e-05
ENSMUSG00000020629	Adi1	848.577	847.475	508.34	528.578	848.026	518.459	1.63561	0.70983	0.000113413	0.00134521
ENSMUSG00000050144	Slc25a44	1400.98	1700.65	899.717	998.908	1550.81	949.312	1.63345	0.707921	0.000161151	0.00183084
ENSMUSG00000034957	Cebpa	15721.4	18495.2	9787.12	11174	17108.3	10480.6	1.63236	0.706962	1.38473e-05	0.000225964
ENSMUSG00000001436	Slc19a1	697.719	584.348	385.079	400.78	641.033	392.929	1.63152	0.706216	0.000888563	0.00758377
ENSMUSG00000026385	Dbi	12463.5	13192.8	8558.11	7182.74	12828.2	7870.43	1.62994	0.704819	7.90419e-06	0.00014084
ENSMUSG00000021519	Mterf3	765.383	574.096	405.772	416.429	669.74	411.101	1.62931	0.704264	0.0021722	0.015671
ENSMUSG00000084957	Bbip1	351.633	336.029	220.431	201.694	343.831	211.062	1.62928	0.704236	0.00396692	0.0250796
ENSMUSG00000025630	Hprt	1588.45	1608.38	989.689	973.696	1598.41	981.692	1.62823	0.703306	1.14773e-05	0.000192288
ENSMUSG00000047409	Ctdspl	2603.41	3532.29	1685.17	2083.01	3067.85	1884.09	1.62817	0.703251	0.000862892	0.00741926
ENSMUSG00000021294	Kif26a	753.181	701.673	491.245	402.519	727.427	446.882	1.62809	0.703184	0.000842516	0.00727374
ENSMUSG00000021185	Dglucy	617.853	583.209	377.881	360.789	600.531	369.335	1.62611	0.701428	0.000567141	0.00521652
ENSMUSG00000027809	Etfdh	2150.84	2324.86	1276.7	1476.19	2237.85	1376.45	1.62569	0.701055	3.35377e-05	0.000478499
ENSMUSG00000005510	Ndufs3	1554.06	1890.87	1157.94	961.525	1722.47	1059.73	1.62542	0.700815	0.000346577	0.00348803
ENSMUSG00000015468	Notch4	938.426	1291.72	695.481	677.24	1115.07	686.361	1.62448	0.699981	0.00131807	0.0103813
ENSMUSG00000056973	Ces1d	19860	19822.3	11188	13241.4	19841.1	12214.7	1.62435	0.699865	4.9106e-06	9.4035e-05
ENSMUSG00000040213	Kyat3	356.07	332.611	228.528	195.609	344.34	212.068	1.6241	0.699639	0.0052727	0.0314935
ENSMUSG00000032328	Tmem30a	4031.02	3989.06	2372.55	2565.51	4010.04	2469.03	1.6241	0.699638	1.95722e-06	4.28486e-05
ENSMUSG00000021235	Coq6	495.835	585.487	329.296	336.447	540.661	332.872	1.62404	0.699584	0.00144898	0.0112452
ENSMUSG00000058173	Smco4	302.825	377.035	222.23	196.478	339.93	209.354	1.62369	0.699275	0.00796921	0.0437711
ENSMUSG00000071042	Rasgrp3	657.786	681.17	490.346	334.708	669.478	412.527	1.62323	0.698863	0.00493321	0.0298358
ENSMUSG00000049299	Trappc1	469.213	643.58	354.488	331.23	556.397	342.859	1.62266	0.698359	0.00445692	0.0275207
ENSMUSG00000046230	Vps13a	1395.44	1746.21	1008.58	927.619	1570.82	968.101	1.62254	0.698257	0.000262441	0.00276975
ENSMUSG00000032059	Alg9	611.197	763.183	418.368	428.6	687.19	423.484	1.6225	0.698218	0.0012226	0.00980921
ENSMUSG00000043252	Tmem64	1528.55	1065.04	815.144	786.781	1296.79	800.962	1.61921	0.695287	0.00187451	0.0138897
ENSMUSG00000049327	Kmt5a	2074.3	3250.93	1623.99	1665.72	2662.62	1644.85	1.61867	0.69481	0.0027306	0.0187473
ENSMUSG00000036452	Arhgap26	480.306	530.811	334.695	290.37	505.558	312.532	1.61775	0.693986	0.00195324	0.0143859
ENSMUSG00000025479	Cyp2e1	22108.5	17614.7	9702.55	14854.1	19861.6	12278.3	1.61761	0.693859	0.00246344	0.0172484
ENSMUSG00000019373	Cops3	867.434	904.429	531.733	564.222	885.932	547.977	1.61661	0.692975	0.000162073	0.00183741
ENSMUSG00000047242	Taf9b	347.195	324.638	210.534	205.172	335.917	207.853	1.61627	0.692664	0.00461501	0.0283537
ENSMUSG00000026820	Ptges2	631.164	854.31	448.959	470.33	742.737	459.644	1.61565	0.692115	0.00248055	0.0173453
ENSMUSG00000074793	Hspa12b	1347.74	1215.4	806.146	780.695	1281.57	793.421	1.61535	0.691843	6.86621e-05	0.000875855
ENSMUSG00000032271	Nnmt	1985.56	1584.46	1001.38	1209.3	1785.01	1105.34	1.61487	0.691415	0.0005648	0.00519799
ENSMUSG00000055322	Tns1	17242.2	21691.5	11816	12299.9	19466.8	12057.9	1.61443	0.691025	3.80176e-05	0.000530511
ENSMUSG00000012640	Zfp715	648.912	583.209	385.079	378.176	616.06	381.628	1.61443	0.691024	0.000746102	0.00656256
ENSMUSG00000023004	Tuba1b	5224.57	6434.66	3992.94	3229.71	5829.62	3611.33	1.61427	0.690886	0.000230776	0.00248338
ENSMUSG00000027774	Gfm1	899.602	1372.59	753.963	653.767	1136.1	703.865	1.61402	0.690655	0.00508142	0.0305655
ENSMUSG00000005873	Reep5	5410.93	6038.26	3446.82	3647.88	5724.59	3547.35	1.61373	0.690397	4.24262e-06	8.24356e-05
ENSMUSG00000039270	Megf9	1199.1	1829.36	995.987	881.542	1514.23	938.765	1.61294	0.689693	0.00380881	0.0243709
ENSMUSG00000030751	Psma1	2119.78	2404.6	1450.34	1362.3	2262.19	1406.32	1.60857	0.68578	3.11579e-05	0.000448979
ENSMUSG00000030249	Abcc9	2005.53	2011.61	1245.21	1252.76	2008.57	1248.99	1.60815	0.685405	8.75992e-06	0.000153
ENSMUSG00000032330	Cox7a2	1803.64	2177.92	1301.89	1176.26	1990.78	1239.07	1.60666	0.684063	0.000156993	0.0017887
ENSMUSG00000035954	Dock4	591.231	600.295	351.789	390.348	595.763	371.069	1.60535	0.68289	0.000923599	0.00779176
ENSMUSG00000041548	Hspb8	1222.39	1708.62	1058.97	768.524	1465.51	913.745	1.6039	0.681582	0.00533244	0.0318026
ENSMUSG00000025092	Hspa12a	1818.06	1939.85	1253.31	1091.06	1878.96	1172.18	1.60303	0.6808	6.34911e-05	0.000818433
ENSMUSG00000024993	Dennd10	606.76	579.792	391.377	349.487	593.276	370.432	1.6018	0.679693	0.00108586	0.00889163
ENSMUSG00000025815	Dhtkd1	372.708	355.393	209.634	245.163	364.051	227.398	1.60071	0.678709	0.00563046	0.0331938
ENSMUSG00000030826	Bcat2	2588.99	2935.41	1638.38	1812.64	2762.2	1725.51	1.6007	0.678707	3.8665e-05	0.000536717
ENSMUSG00000026781	Acbd5	1686.06	1836.2	1029.28	1171.04	1761.13	1100.16	1.60065	0.678661	7.91558e-05	0.000989074
ENSMUSG00000033530	Ttc7b	981.687	1197.17	725.172	636.38	1089.43	680.776	1.60028	0.678327	0.00071403	0.00631541
ENSMUSG00000058997	Vwa8	2074.3	2649.5	1394.56	1559.65	2361.9	1477.11	1.59888	0.677062	0.000369498	0.00366591
ENSMUSG00000045973	Slc25a51	3236.79	4031.2	2104.44	2441.19	3634	2272.82	1.5988	0.676993	0.000228799	0.00246545
ENSMUSG00000079659	Tmem243	581.247	542.202	300.505	402.519	561.725	351.512	1.59772	0.676011	0.0046881	0.0287058
ENSMUSG00000005299	Letm1	1528.55	1995.67	1067.06	1138.88	1762.11	1102.97	1.59747	0.675786	0.000580546	0.00532441
ENSMUSG00000062949	Atp11c	997.216	901.012	565.022	623.339	949.114	594.181	1.59731	0.675643	0.000335045	0.00339401
ENSMUSG00000026753	Ppp6c	1569.59	1683.56	1058.07	979.781	1626.57	1018.92	1.59639	0.674817	4.937e-05	0.000657192
ENSMUSG00000044197	Gpr146	1192.44	1401.07	837.636	787.65	1296.76	812.643	1.59569	0.674181	0.000229786	0.00247441
ENSMUSG00000022401	Xpnpep3	729.887	833.806	453.457	526.839	781.847	490.148	1.59484	0.673413	0.00104901	0.00865226
ENSMUSG00000107002	0610012G03Rik	795.333	954.549	601.011	496.411	874.941	548.711	1.59462	0.673209	0.00158108	0.0121363
ENSMUSG00000037072	Selenof	5403.16	5764.88	3654.65	3351.43	5584.02	3503.04	1.59407	0.672712	5.27248e-06	0.00010024
ENSMUSG00000021650	Ptcd2	439.263	531.95	307.703	301.672	485.607	304.688	1.59363	0.672316	0.00335614	0.0220789
ENSMUSG00000029632	Ndufa4	3192.42	3663.28	2377.05	1925.66	3427.85	2151.35	1.59339	0.6721	0.000195612	0.00215607
ENSMUSG00000049313	Sorl1	3670.51	6173.81	3043.74	3134.95	4922.16	3089.35	1.59322	0.671947	0.00579548	0.0339401
ENSMUSG00000024132	Eci1	1906.8	2392.07	1319.88	1378.82	2149.43	1349.35	1.59283	0.671596	0.000245601	0.00261109
ENSMUSG00000020056	Washc3	424.843	461.327	292.408	264.289	443.085	278.348	1.59192	0.670768	0.00313974	0.021003
ENSMUSG00000027406	Idh3b	3488.59	4098.41	2426.54	2342.09	3793.5	2384.31	1.591	0.669934	3.38562e-05	0.000481746
ENSMUSG00000053012	Krcc1	1805.86	1892.01	1247.01	1078.02	1848.94	1162.51	1.59055	0.669525	8.56404e-05	0.00105992
ENSMUSG00000020077	Srgn	1075.97	773.435	614.507	548.573	924.704	581.54	1.59035	0.669348	0.00356929	0.0231647
ENSMUSG00000052921	Arhgef15	1141.42	1229.07	780.055	711.146	1185.24	745.6	1.5897	0.668753	0.000161471	0.00183316
ENSMUSG00000058624	Gda	2128.65	2769.1	1549.31	1531.83	2448.88	1540.57	1.58952	0.668591	0.000382018	0.00376662
ENSMUSG00000110841	Gpx4-ps2	1596.21	1969.47	1183.13	1060.63	1782.84	1121.88	1.58914	0.668246	0.00037423	0.00370131
ENSMUSG00000030614	Tmem126b	699.937	652.693	417.469	433.816	676.315	425.642	1.58894	0.668061	0.000692397	0.00616179
ENSMUSG00000001175	Calm1	8369.3	9268.69	5925.54	5178.84	8818.99	5552.19	1.58839	0.667569	1.87348e-05	0.000292793
ENSMUSG00000027583	Zbtb46	669.987	558.149	375.182	398.172	614.068	386.677	1.58814	0.66734	0.00197267	0.0144553
ENSMUSG00000039031	Arhgap18	1144.75	1341.84	824.141	742.443	1243.29	783.292	1.58727	0.666546	0.000371047	0.00367669
ENSMUSG00000038188	Scarf1	459.23	528.533	314.901	307.757	493.881	311.329	1.58626	0.665626	0.00263633	0.0182658
ENSMUSG00000024805	Pcgf5	634.491	690.282	378.781	456.42	662.387	417.6	1.58586	0.665267	0.00182522	0.0136197
ENSMUSG00000020311	Erlec1	783.131	863.422	500.243	538.141	823.277	519.192	1.58551	0.664951	0.000519913	0.00485848
ENSMUSG00000003464	Pex19	3093.7	4035.76	2224.1	2275.14	3564.73	2249.62	1.58453	0.664054	0.000315583	0.00323605
ENSMUSG00000034810	Scn7a	5610.59	5230.65	2985.26	3860.01	5420.62	3422.63	1.58371	0.663308	0.000238194	0.00254844
ENSMUSG00000036863	Syde2	384.91	519.42	282.511	288.631	452.165	285.571	1.58308	0.662738	0.008528	0.0461774
ENSMUSG00000025894	Aasdhppt	564.609	587.765	370.683	357.312	576.187	363.997	1.58296	0.662625	0.00116712	0.0094348
ENSMUSG00000025464	Paox	492.507	688.004	371.583	374.699	590.256	373.141	1.58161	0.661398	0.00680689	0.0385975
ENSMUSG00000030630	Fah	1845.79	1971.75	1169.63	1244.94	1908.77	1207.29	1.58096	0.660801	3.93182e-05	0.000544833
ENSMUSG00000015672	Mrpl32	394.893	448.797	283.411	250.379	421.845	266.895	1.58064	0.660507	0.00511848	0.0307109
ENSMUSG00000014226	Cacybp	929.552	1078.71	690.083	580.74	1004.13	635.411	1.58036	0.660253	0.0010102	0.00838874
ENSMUSG00000037316	Bag4	861.888	828.111	467.853	601.605	844.999	534.729	1.58001	0.659931	0.00184049	0.0136936
ENSMUSG00000001642	Akr1b3	2219.61	2512.81	1605.1	1391.86	2366.21	1498.48	1.57911	0.659112	0.00013362	0.00155815
ENSMUSG00000015536	Mocs2	1578.46	1786.08	1048.17	1082.37	1682.27	1065.27	1.57911	0.65911	9.33732e-05	0.00114072
ENSMUSG00000039842	Mcph1	440.373	398.678	269.015	262.55	419.525	265.783	1.57861	0.658653	0.00390662	0.0248216
ENSMUSG00000020085	Aifm2	3425.37	3171.2	2027.06	2151.69	3298.28	2089.38	1.57859	0.658636	1.43712e-05	0.000232603
ENSMUSG00000025817	Nudt5	664.441	742.68	451.658	439.902	703.561	445.78	1.57821	0.658286	0.000888924	0.00758377
ENSMUSG00000030105	Arl8b	2544.62	2395.48	1517.82	1618.77	2470.05	1568.3	1.57497	0.655328	2.40767e-05	0.000362725
ENSMUSG00000070493	Chchd2	7453.06	9619.53	5521.56	5319.68	8536.29	5420.62	1.57476	0.655134	0.000199492	0.00219124
ENSMUSG00000024451	Arap3	1521.89	1626.61	951.901	1047.59	1574.25	999.746	1.57453	0.65492	0.000102587	0.00123337
ENSMUSG00000037971	1110032A03Rik	693.282	673.196	419.268	448.596	683.239	433.932	1.57446	0.654855	0.00081437	0.00709239
ENSMUSG00000030495	Slc7a10	2351.61	1746.21	1110.25	1494.45	2048.91	1302.35	1.5732	0.653703	0.00415136	0.0260591
ENSMUSG00000031641	Cbr4	447.028	533.089	318.5	305.149	490.059	311.825	1.57148	0.652122	0.00400477	0.0252687
ENSMUSG00000056429	Tgoln1	6513.52	6771.83	4135.1	4320.77	6642.67	4227.94	1.57112	0.651792	3.18796e-06	6.47947e-05
ENSMUSG00000022354	Ndufb9	1034.93	1325.89	786.353	716.362	1180.41	751.357	1.57099	0.651671	0.0013697	0.0107189
ENSMUSG00000067924	Rtl8b	481.415	506.89	307.703	321.667	494.153	314.685	1.57018	0.650926	0.00237611	0.0167831
ENSMUSG00000022206	Npr3	4927.29	7293.53	3493.6	4290.35	6110.41	3891.97	1.56995	0.650714	0.0035328	0.0229748
ENSMUSG00000006611	Hfe	1168.04	1364.62	782.754	831.119	1266.33	806.936	1.56916	0.649992	0.000367851	0.0036537
ENSMUSG00000030930	Chst15	1252.34	845.197	593.813	743.312	1048.77	668.563	1.56871	0.649576	0.0093413	0.0496557
ENSMUSG00000031871	Cdh5	5556.24	5755.77	3725.73	3487.05	5656	3606.39	1.56834	0.649242	5.60455e-06	0.000105543
ENSMUSG00000001029	Icam2	361.616	369.062	234.826	231.253	365.339	233.039	1.56772	0.648664	0.00570163	0.0334768
ENSMUSG00000029199	Lias	634.491	822.416	421.967	507.713	728.454	464.84	1.56676	0.647785	0.00510697	0.030665
ENSMUSG00000028600	Podn	1154.73	1544.59	867.327	855.461	1349.66	861.394	1.56672	0.647746	0.00164994	0.0125594
ENSMUSG00000073481	Mtarc2	2515.78	3280.55	1816.53	1883.06	2898.17	1849.79	1.56667	0.647704	0.000528634	0.00492215
ENSMUSG00000063884	Ptcd3	929.552	1002.39	606.409	626.817	965.971	616.613	1.56648	0.647524	0.000334495	0.0033906
ENSMUSG00000032349	Elovl5	2398.2	2494.58	1736.45	1388.39	2446.39	1562.42	1.56587	0.646963	0.000320456	0.00327195
ENSMUSG00000022106	Rcbtb2	1577.35	1823.67	1058.07	1114.53	1700.51	1086.3	1.56531	0.646444	0.000180149	0.00201073
ENSMUSG00000000355	Mcts1	618.962	618.52	432.764	358.181	618.741	395.472	1.56482	0.645994	0.00253443	0.0176599
ENSMUSG00000054720	Lrrc8c	858.56	1013.78	602.81	594.65	936.171	598.73	1.56349	0.644771	0.000813225	0.00709146
ENSMUSG00000026492	Tfb2m	587.903	603.712	385.979	376.438	595.808	381.208	1.56296	0.644279	0.00135144	0.0105864
ENSMUSG00000032602	Slc25a20	1285.62	1529.78	877.224	924.142	1407.7	900.683	1.56279	0.644128	0.000404956	0.00394144
ENSMUSG00000039254	Pomt1	716.576	873.674	527.234	490.325	795.125	508.78	1.56275	0.644084	0.00181662	0.0135683
ENSMUSG00000025979	Mob4	1100.38	953.41	684.685	630.294	1026.89	657.489	1.56202	0.643414	0.00065904	0.00592465
ENSMUSG00000035936	Aldh5a1	482.524	406.651	282.511	286.893	444.588	284.702	1.56174	0.643156	0.00544903	0.0323401
ENSMUSG00000028691	Prdx1	6534.6	7078.24	4514.78	4205.15	6806.42	4359.96	1.56112	0.642585	1.07524e-05	0.000181807
ENSMUSG00000025860	Xiap	3235.68	2667.72	1902.9	1880.45	2951.7	1891.68	1.56042	0.641939	0.000162695	0.0018418
ENSMUSG00000028252	Ccnc	549.079	439.685	312.202	321.667	494.382	316.935	1.56005	0.641589	0.00579417	0.0339401
ENSMUSG00000027086	Fastkd1	346.086	363.366	236.626	218.212	354.726	227.419	1.55988	0.641439	0.00752814	0.0418365
ENSMUSG00000037049	Smpd1	1070.43	1452.33	804.347	812.862	1261.38	808.605	1.5598	0.641365	0.00232625	0.0165247
ENSMUSG00000029020	Mfn2	4104.23	4638.33	2816.11	2791.55	4371.28	2803.83	1.55901	0.640632	2.59099e-05	0.000385592
ENSMUSG00000038145	Snrk	3328.86	3367.12	2056.75	2238.63	3347.99	2147.69	1.55883	0.640465	1.94059e-05	0.000301209
ENSMUSG00000026767	Mindy3	614.525	533.089	359.887	376.438	573.807	368.162	1.55864	0.640287	0.00261213	0.0181219
ENSMUSG00000026618	Iars2	2337.19	2629	1495.33	1690.93	2483.09	1593.13	1.55852	0.640177	0.00013916	0.00161328
ENSMUSG00000034731	Dgkh	769.82	566.123	419.268	438.163	667.971	428.716	1.55823	0.639911	0.0061124	0.0353789
ENSMUSG00000005078	Jkamp	608.979	715.342	436.363	413.821	662.16	425.092	1.55762	0.639345	0.00210765	0.0153033
ENSMUSG00000019877	Serinc1	6501.32	6251.27	3958.75	4231.23	6376.29	4094.99	1.55708	0.638846	7.10101e-06	0.0001284
ENSMUSG00000022361	Zhx1	1615.07	1927.32	1110.25	1165.83	1771.2	1138.04	1.55625	0.638071	0.000310874	0.00319807
ENSMUSG00000038845	Phb	1844.68	2627.86	1537.62	1337.09	2236.27	1437.35	1.55579	0.637651	0.003301	0.0217882
ENSMUSG00000001052	Sec24b	2043.24	2207.54	1304.59	1427.51	2125.39	1366.05	1.55577	0.637629	8.29053e-05	0.00103026
ENSMUSG00000015016	Acsf3	582.357	752.932	450.758	407.735	667.644	429.247	1.55531	0.637207	0.00485059	0.0294369
ENSMUSG00000040550	Otud6b	1097.05	1070.73	702.679	691.15	1083.89	696.915	1.55531	0.637202	0.00022116	0.00238961
ENSMUSG00000054690	Emcn	780.913	716.481	508.34	454.681	748.697	481.511	1.55511	0.637014	0.00128201	0.010183
ENSMUSG00000042099	Kank3	1971.14	1738.24	1156.14	1230.16	1854.69	1193.15	1.55446	0.636415	0.0001551	0.00177807
ENSMUSG00000025939	Ube2w	1115.91	1024.03	753.963	623.339	1069.97	688.651	1.55395	0.635937	0.00109274	0.00892957
ENSMUSG00000038982	Bloc1s5	447.028	451.076	278.912	299.064	449.052	288.988	1.55375	0.635751	0.00393153	0.0249353
ENSMUSG00000024640	Psat1	1093.72	1475.11	850.233	805.038	1284.41	827.635	1.55182	0.63396	0.00251586	0.0175613
ENSMUSG00000047879	Usp14	1084.85	1093.52	665.791	738.096	1089.18	701.943	1.55155	0.633708	0.000367507	0.003653
ENSMUSG00000032026	Rexo2	1112.58	1472.83	915.912	752.006	1292.7	833.959	1.55009	0.632354	0.00378353	0.0242384
ENSMUSG00000047866	Lonp2	2754.27	2985.53	1835.42	1867.41	2869.9	1851.42	1.55007	0.632334	3.12799e-05	0.000450328
ENSMUSG00000023206	Il15ra	708.811	666.362	426.466	460.767	687.586	443.616	1.5499	0.63218	0.00134183	0.0105423
ENSMUSG00000020642	Rnf144a	1742.63	1499.03	1037.37	1056.29	1620.83	1046.83	1.54838	0.630763	0.000271105	0.00284231
ENSMUSG00000074909	Ranbp6	616.743	517.142	347.291	385.131	566.943	366.211	1.54814	0.63054	0.00435815	0.0270474
ENSMUSG00000074918	Inafm2	675.534	894.178	494.844	519.015	784.856	506.929	1.54803	0.630435	0.00436886	0.0270943
ENSMUSG00000027346	Gpcpd1	1131.44	995.556	684.685	689.411	1063.5	687.048	1.548	0.630406	0.000532583	0.00494732
ENSMUSG00000037523	Mavs	992.779	1308.8	729.67	757.222	1150.79	743.446	1.54775	0.630174	0.00235395	0.0166579
ENSMUSG00000031095	Cul4b	1092.61	956.827	625.303	698.974	1024.72	662.139	1.54756	0.629999	0.000916545	0.00774871
ENSMUSG00000022507	1810013L24Rik	1362.16	1534.34	881.723	990.214	1448.25	935.968	1.54717	0.629633	0.000416427	0.00403579
ENSMUSG00000048249	Crebrf	2106.47	1568.51	1142.64	1232.77	1837.49	1187.7	1.54715	0.629612	0.00184115	0.0136936
ENSMUSG00000072941	Sod3	4602.28	4790.97	2906.09	3167.12	4696.63	3036.6	1.54663	0.629128	1.922e-05	0.000298889
ENSMUSG00000022292	Rrm2b	753.181	658.388	453.457	459.897	705.785	456.677	1.54557	0.628143	0.0016813	0.0127493
ENSMUSG00000040112	Mrps35	547.97	602.573	376.082	368.613	575.272	372.348	1.54492	0.627534	0.00239298	0.016859
ENSMUSG00000027439	Gzf1	1041.59	1066.18	651.395	712.884	1053.88	682.14	1.54485	0.627465	0.000420686	0.00406467
ENSMUSG00000002881	Nab1	1527.44	1696.09	1037.37	1049.33	1611.76	1043.35	1.54473	0.627352	0.000163076	0.00184479
ENSMUSG00000035765	Dym	682.189	682.309	430.964	452.942	682.249	441.953	1.54364	0.626336	0.00122965	0.00985579
ENSMUSG00000024231	Cul2	864.106	881.648	599.211	532.055	872.877	565.633	1.54331	0.62603	0.000885462	0.00756641
ENSMUSG00000021771	Vdac2	2848.56	3473.05	2101.74	1994.34	3160.81	2048.04	1.5433	0.626021	0.00026819	0.00281919
ENSMUSG00000031523	Dlc1	7008.25	5572.38	3768.01	4392.06	6290.31	4080.04	1.54173	0.624547	0.00059527	0.00543748
ENSMUSG00000057858	Fam204a	466.995	431.711	270.815	312.104	449.353	291.46	1.54159	0.624419	0.00634505	0.0364336
ENSMUSG00000033068	Entpd6	768.711	873.674	589.315	476.415	821.192	532.865	1.54122	0.624073	0.00317703	0.0211811
ENSMUSG00000024120	Lrpprc	1357.72	1311.08	905.115	826.772	1334.4	865.944	1.54109	0.62395	0.000251887	0.00266544
ENSMUSG00000064373	Selenop	19318.7	18074.9	11208.7	13064	18696.8	12136.4	1.54055	0.623448	4.59156e-05	0.00061951
ENSMUSG00000020846	Rflnb	3892.36	3371.68	2504.81	2210.81	3632.02	2357.81	1.5405	0.623398	0.000188549	0.00209262
ENSMUSG00000010517	Faf1	976.141	1075.29	676.587	655.506	1025.72	666.047	1.53997	0.622904	0.000535886	0.0049693
ENSMUSG00000029063	Nadk	4774.22	6105.47	3396.43	3668.75	5439.84	3532.59	1.53985	0.622791	0.000486587	0.00459526
ENSMUSG00000040822	1700123O20Rik	515.802	585.487	358.087	357.312	550.644	357.699	1.53928	0.62226	0.0033499	0.0220488
ENSMUSG00000025762	Larp1b	662.223	926.072	538.031	493.803	794.147	515.917	1.53918	0.622164	0.00780078	0.0430506
ENSMUSG00000027599	Armc1	830.829	923.794	581.217	559.006	877.311	570.111	1.53881	0.621811	0.000902589	0.00767152
ENSMUSG00000013663	Pten	3764.8	3987.92	2585.79	2452.5	3876.36	2519.14	1.53877	0.621776	2.37983e-05	0.000359554
ENSMUSG00000025902	Sox17	625.617	633.328	427.366	391.217	629.473	409.291	1.53808	0.621126	0.00196545	0.0144357
ENSMUSG00000003623	Crot	1162.49	1132.25	708.077	784.173	1147.37	746.125	1.53768	0.620758	0.000426775	0.0041135
ENSMUSG00000006010	Odr4	1074.86	1008.09	683.785	672.024	1041.47	677.904	1.53638	0.619538	0.000428184	0.00411808
ENSMUSG00000020570	Sypl	2744.29	2607.35	1726.56	1757	2675.82	1741.78	1.53627	0.619429	3.67948e-05	0.000516622
ENSMUSG00000060703	Cd302	1572.92	1784.94	1092.26	1093.67	1678.93	1092.96	1.53606	0.619235	0.000233332	0.00250868
ENSMUSG00000072235	Tuba1a	2709.9	3837.56	2305.07	1957.82	3273.73	2131.45	1.5359	0.619086	0.00369426	0.0237911
ENSMUSG00000022789	Dnm1l	2036.58	1784.94	1294.69	1194.52	1910.76	1244.6	1.53535	0.618565	0.000271808	0.00284781
ENSMUSG00000031696	Vps35	2927.31	3205.37	2023.46	1973.47	3066.34	1998.47	1.53433	0.617607	4.98268e-05	0.000662163
ENSMUSG00000021716	Srek1ip1	438.154	420.32	273.514	286.023	429.237	279.769	1.53423	0.617513	0.00558342	0.0329532
ENSMUSG00000033111	3830406C13Rik	508.037	447.658	333.795	289.501	477.848	311.648	1.53362	0.616945	0.00695306	0.0392352
ENSMUSG00000021024	Psma6	1763.71	2307.78	1418.85	1236.25	2035.74	1327.55	1.53344	0.616774	0.00201195	0.0146957
ENSMUSG00000006717	Acot13	430.389	541.063	329.296	304.28	485.726	316.788	1.53319	0.616535	0.00901874	0.0482639
ENSMUSG00000026087	Mrpl30	1152.51	1412.46	859.23	813.731	1282.49	836.481	1.53313	0.61648	0.00116684	0.0094348
ENSMUSG00000047867	Gimap6	725.45	888.482	550.627	502.497	806.966	526.562	1.53248	0.615865	0.00300838	0.0202779
ENSMUSG00000020589	Cyria	889.619	735.846	486.747	574.654	812.732	530.701	1.53139	0.614842	0.00386395	0.024639
ENSMUSG00000030647	Ndufc2	807.535	1013.78	645.997	543.357	910.658	594.677	1.53137	0.614824	0.00435764	0.0270474
ENSMUSG00000027822	Slc33a1	573.483	541.063	353.589	374.699	557.273	364.144	1.53033	0.613846	0.00302105	0.0203374
ENSMUSG00000032125	Robo4	1402.09	1764.43	995.987	1073.67	1583.26	1034.83	1.52983	0.613373	0.00132703	0.0104415
ENSMUSG00000032381	Ciao2a	697.719	701.673	503.841	411.213	699.696	457.527	1.52954	0.613094	0.0034777	0.0226814
ENSMUSG00000027667	Zfp639	679.971	619.659	396.775	452.942	649.815	424.859	1.52939	0.612957	0.00308458	0.0207037
ENSMUSG00000034640	Tiparp	983.905	889.621	667.59	559.006	936.763	613.298	1.52766	0.611325	0.00204352	0.0148853
ENSMUSG00000030086	Chchd6	533.55	626.494	407.572	352.095	580.022	379.834	1.52709	0.610789	0.00585957	0.0342271
ENSMUSG00000038206	Fbxo8	745.417	768.879	486.747	505.974	757.148	496.36	1.52532	0.609111	0.0012183	0.00977963
ENSMUSG00000026856	Dolpp1	468.104	552.454	322.998	346.01	510.279	334.504	1.52522	0.609021	0.006326	0.0363505
ENSMUSG00000008892	Vdac3	1752.62	1690.39	1179.53	1078.89	1721.51	1129.21	1.52461	0.608442	0.000195763	0.00215624
ENSMUSG00000023307	Marchf5	2676.62	3067.54	1718.46	2053.45	2872.08	1885.96	1.52277	0.606698	0.000605801	0.00551911
ENSMUSG00000022105	Rb1	2145.29	1839.61	1223.62	1393.6	1992.45	1308.61	1.52256	0.606495	0.00064806	0.00585575
ENSMUSG00000020962	Gtf2a1	1061.55	1106.05	688.283	735.488	1083.8	711.886	1.52233	0.606284	0.000540582	0.005007
ENSMUSG00000022677	Cep20	677.752	661.805	407.572	472.938	669.779	440.255	1.52117	0.605182	0.00299531	0.0202069
ENSMUSG00000039740	Alg2	810.862	784.826	507.44	541.618	797.844	524.529	1.52101	0.60503	0.00123258	0.00987318
ENSMUSG00000030313	Dennd5b	777.585	609.408	418.368	493.803	693.496	456.086	1.52053	0.604577	0.0079699	0.0437711
ENSMUSG00000062646	Ganc	1011.64	936.324	610.908	670.285	973.98	640.597	1.52038	0.604432	0.001009	0.00838318
ENSMUSG00000026643	Nmt2	1180.24	1216.54	736.868	839.813	1198.39	788.34	1.52	0.604071	0.000708355	0.0062722
ENSMUSG00000032757	Bet1	591.231	639.024	457.056	352.965	615.127	405.01	1.51903	0.603147	0.00808961	0.0442756
ENSMUSG00000025980	Hspd1	3985.54	5424.3	3271.37	2927.17	4704.92	3099.27	1.51805	0.602223	0.00215043	0.0155358
ENSMUSG00000028013	Ppa2	676.643	751.793	452.558	488.587	714.218	470.572	1.51758	0.60177	0.00240588	0.0169425
ENSMUSG00000039831	Arhgap29	4936.17	4212.32	2888.99	3141.04	4574.24	3015.01	1.51716	0.601373	0.000212727	0.00231423
ENSMUSG00000037112	Sik2	4485.81	3511.78	2324.87	2951.52	3998.8	2638.19	1.51572	0.599999	0.0028293	0.0193166
ENSMUSG00000028565	Nfia	2272.85	2197.28	1391.86	1557.91	2235.07	1474.89	1.51536	0.599661	0.000188969	0.00209448
ENSMUSG00000027227	Sord	906.258	1095.79	613.607	707.668	1001.03	660.638	1.51501	0.599326	0.0030586	0.0205467
ENSMUSG00000027624	Epb41l1	2882.94	3509.5	1876.81	2343.82	3196.22	2110.32	1.51446	0.598807	0.00183701	0.013682
ENSMUSG00000060992	Copz1	1915.68	2295.25	1456.64	1324.05	2105.46	1390.35	1.51433	0.598679	0.00074119	0.00652658
ENSMUSG00000069237	Fam8a1	1998.87	1868.09	1229.01	1325.79	1933.48	1277.4	1.51358	0.597966	0.000210495	0.00229623
ENSMUSG00000016128	Stard13	515.802	539.924	361.686	336.447	527.863	349.066	1.51228	0.596722	0.00452517	0.0278448
ENSMUSG00000050043	Tmx2	1002.76	1159.58	771.957	658.983	1081.17	715.47	1.51119	0.595685	0.00229267	0.0163759
ENSMUSG00000027435	Cd93	3161.36	3067.54	2255.59	1866.54	3114.45	2061.07	1.51117	0.595669	0.000418111	0.00404717
ENSMUSG00000053799	Exoc6	726.559	658.388	446.26	470.33	692.474	458.295	1.511	0.595499	0.00257849	0.0179198
ENSMUSG00000021003	Galc	506.928	535.367	347.291	342.532	521.148	344.911	1.51092	0.595432	0.00440639	0.0272874
ENSMUSG00000024962	Vegfb	2094.27	2569.76	1575.4	1513.58	2332.01	1544.49	1.50985	0.594402	0.000764439	0.00670159
ENSMUSG00000032035	Ets1	2449.23	2017.31	1595.2	1364.04	2233.27	1479.62	1.50948	0.594054	0.00140824	0.010988
ENSMUSG00000033191	Tie1	1922.33	2017.31	1347.78	1263.2	1969.82	1305.49	1.5089	0.5935	0.000179455	0.00200518
ENSMUSG00000003438	Timm50	1031.6	1258.68	735.069	783.303	1145.14	759.186	1.50822	0.592846	0.00208144	0.0151407
ENSMUSG00000030876	Mettl9	1158.06	1291.72	861.029	763.308	1224.89	812.169	1.50821	0.592838	0.00113334	0.00922339
ENSMUSG00000008540	Mgst1	9317.71	10648.1	6267.43	6971.49	9982.91	6619.46	1.50809	0.59272	0.000141021	0.00163247
ENSMUSG00000025757	Hspa4l	581.247	616.242	388.678	405.996	598.745	397.337	1.50677	0.591463	0.00336854	0.0221381
ENSMUSG00000031958	Ldhd	850.795	732.428	501.142	550.312	791.612	525.727	1.50575	0.590485	0.00316739	0.0211545
ENSMUSG00000060450	Rnf14	1734.87	1873.79	1133.64	1264.94	1804.33	1199.29	1.50438	0.589173	0.000433478	0.00416296
ENSMUSG00000022807	Osbpl11	1836.92	1589.02	963.597	1313.62	1712.97	1138.61	1.50434	0.589132	0.00538344	0.0320106
ENSMUSG00000067787	Blcap	2675.51	2541.29	1731.96	1736.13	2608.4	1734.04	1.50425	0.589042	8.78063e-05	0.00108169
ENSMUSG00000021548	Ccnh	514.692	512.586	362.586	320.798	513.639	341.692	1.50341	0.588237	0.00621131	0.0358149
ENSMUSG00000031818	Cox4i1	7945.56	10091.1	6460.87	5548.33	9018.34	6004.6	1.5019	0.586793	0.0012574	0.0100226
ENSMUSG00000032314	Etfa	3999.96	4092.71	2791.82	2596.81	4046.34	2694.32	1.50183	0.586719	6.00976e-05	0.000780385
ENSMUSG00000029407	Uso1	2232.92	2414.85	1593.4	1501.4	2323.89	1547.4	1.5018	0.586696	0.00018966	0.00210067
ENSMUSG00000021699	Pde4d	447.028	427.155	274.414	307.757	437.091	291.086	1.50146	0.586364	0.00933009	0.0496127
ENSMUSG00000050697	Prkaa1	1392.11	1455.74	839.436	1057.16	1423.93	948.296	1.50139	0.586297	0.002203	0.0158398
ENSMUSG00000040732	Erg	573.483	705.09	429.165	422.514	639.287	425.84	1.50109	0.586013	0.00638928	0.036595
ENSMUSG00000027002	Nckap1	4420.36	4861.59	3052.74	3132.34	4640.98	3092.54	1.50067	0.585606	7.39229e-05	0.000931007
ENSMUSG00000020687	Cdc27	1550.73	1460.3	1011.28	995.43	1505.52	1003.36	1.50053	0.585472	0.000335389	0.00339533
ENSMUSG00000031753	Cog4	1603.98	1847.59	1065.26	1235.38	1725.78	1150.32	1.50011	0.585069	0.00124275	0.00994074
ENSMUSG00000063558	Aox1	1456.45	1573.07	907.814	1111.93	1514.76	1009.87	1.49978	0.584754	0.00170446	0.0128999
ENSMUSG00000027206	Cops2	2217.39	1879.48	1417.05	1315.36	2048.44	1366.21	1.49947	0.584449	0.000744233	0.00654975
ENSMUSG00000037458	Azin1	1148.07	1239.32	869.127	723.317	1193.7	796.222	1.49931	0.584299	0.00200416	0.0146455
ENSMUSG00000018882	Mrpl45	596.777	604.851	424.666	377.307	600.814	400.987	1.49849	0.58351	0.00450468	0.0277617
ENSMUSG00000035798	Zdhhc17	947.3	825.833	580.317	603.344	886.567	591.831	1.49806	0.5831	0.0021801	0.0157003
ENSMUSG00000029864	Gstk1	849.686	714.203	523.635	520.753	781.945	522.194	1.49756	0.58261	0.00360438	0.0233447
ENSMUSG00000005354	Txn2	1992.21	2496.86	1688.77	1309.27	2244.54	1499.02	1.49737	0.582435	0.00488805	0.0296303
ENSMUSG00000026617	Bpnt1	977.25	1151.61	690.083	732.011	1064.43	711.047	1.49683	0.581914	0.00202837	0.0147885
ENSMUSG00000036352	Ubac1	715.467	855.449	562.323	487.717	785.458	525.02	1.49608	0.581184	0.00548006	0.0324637
ENSMUSG00000061461	Smim20	500.272	569.54	385.979	329.492	534.906	357.735	1.49535	0.580484	0.00936854	0.0497673
ENSMUSG00000026670	Uap1	1188.01	1336.14	808.846	879.804	1262.07	844.325	1.49463	0.57979	0.00114397	0.00930041
ENSMUSG00000031021	Tmem9b	925.115	1080.99	687.384	655.506	1003.05	671.445	1.49381	0.579001	0.00214527	0.0155056
ENSMUSG00000027669	Gnb4	650.021	691.421	467.853	430.339	670.721	449.096	1.49355	0.578744	0.00347605	0.0226799
ENSMUSG00000068566	Myadm	3315.55	4053.98	2610.98	2324.7	3684.77	2467.84	1.49311	0.578321	0.00100519	0.0083603
ENSMUSG00000069255	Dusp22	749.854	672.057	448.059	504.235	710.955	476.147	1.49309	0.578299	0.00424485	0.0265274
ENSMUSG00000004655	Aqp1	10047.6	10375.9	7072.67	6607.22	10211.7	6839.95	1.49296	0.578179	3.21094e-05	0.000460602
ENSMUSG00000038121	Fam210a	950.628	937.463	618.106	646.812	944.045	632.459	1.49262	0.577844	0.00116822	0.0094348
ENSMUSG00000022131	Gpr180	714.358	872.535	571.32	492.064	793.446	531.692	1.49232	0.577556	0.00666247	0.037941
ENSMUSG00000068747	Sort1	8549	9142.25	5352.42	6503.77	8845.63	5928.09	1.49212	0.577362	0.000426137	0.00410985
ENSMUSG00000026739	Bmi1	1079.3	1098.07	734.169	725.925	1088.69	730.047	1.49126	0.576528	0.000770149	0.00674793
ENSMUSG00000068823	Csde1	7209.02	8007.73	5415.4	4791.1	7608.38	5103.25	1.4909	0.576182	0.000202707	0.00222348
ENSMUSG00000031770	Herpud1	1397.66	1485.36	866.427	1068.46	1441.51	967.442	1.48985	0.575165	0.00218591	0.015735
ENSMUSG00000039197	Adk	1158.06	1389.68	889.82	821.556	1273.87	855.688	1.48867	0.574027	0.00219607	0.015801
ENSMUSG00000028646	Rragc	1926.77	2470.66	1367.57	1586.6	2198.72	1477.09	1.48842	0.573781	0.00331493	0.0218711
ENSMUSG00000021646	Mccc2	1438.7	1191.48	862.829	905.015	1315.09	883.922	1.48785	0.573226	0.00202742	0.0147883
ENSMUSG00000002731	Prkra	499.163	490.943	323.898	341.663	495.053	332.78	1.48756	0.572948	0.00685181	0.038783
ENSMUSG00000027099	Mtx2	664.441	824.694	532.632	468.591	744.567	500.612	1.4873	0.572695	0.00793526	0.043611
ENSMUSG00000071369	Map3k5	1337.76	990.999	780.055	787.65	1164.38	783.852	1.48558	0.571028	0.00679722	0.0385701
ENSMUSG00000027634	Ndrg3	1295.6	1214.26	810.645	878.934	1254.93	844.79	1.48546	0.570911	0.000945232	0.00793636
ENSMUSG00000009112	Bcl2l13	1905.69	1770.13	1206.52	1270.15	1837.91	1238.34	1.48418	0.569663	0.000398324	0.00389598
ENSMUSG00000033174	Mgll	18627.6	19548.9	12105.7	13632.6	19088.3	12869.2	1.48324	0.568757	8.97331e-05	0.00110048
ENSMUSG00000034312	Iqsec1	3019.38	3442.3	2036.96	2319.48	3230.84	2178.22	1.48316	0.568678	0.000657052	0.00591682
ENSMUSG00000035367	Rmi1	451.465	472.718	311.302	312.104	462.092	311.703	1.48242	0.567954	0.0085428	0.0461829
ENSMUSG00000067722	BC003965	523.566	607.13	402.173	360.789	565.348	381.481	1.48199	0.567538	0.00891959	0.0478138
ENSMUSG00000031119	Gpc4	1284.51	1725.71	1026.58	1004.99	1505.11	1015.79	1.48162	0.567179	0.00538184	0.0320106
ENSMUSG00000024759	Atl3	5808.04	6621.47	4008.24	4384.24	6214.75	4196.24	1.48099	0.566561	0.000276099	0.00287759
ENSMUSG00000026667	Uhmk1	2811.95	3032.23	1946.99	2001.29	2922.09	1974.14	1.48014	0.565737	0.000179311	0.00200518
ENSMUSG00000059920	4930453N24Rik	711.03	732.428	482.248	492.933	721.729	487.591	1.48014	0.565732	0.00282619	0.0193036
ENSMUSG00000020849	Ywhae	5995.5	6659.06	4424.81	4126.04	6327.28	4275.42	1.47992	0.565519	0.000155682	0.00178173
ENSMUSG00000027835	Pdcd10	638.928	689.143	473.251	424.253	664.036	448.752	1.47981	0.565414	0.00502894	0.030288
ENSMUSG00000062373	Tmem65	1182.46	1290.58	814.244	858.069	1236.52	836.157	1.47871	0.564339	0.00109978	0.0089779
ENSMUSG00000110185	Igip	717.685	623.077	468.753	438.163	670.381	453.458	1.47857	0.564207	0.00575339	0.0337309
ENSMUSG00000071180	Smim15	848.577	731.289	529.933	539.01	789.933	534.472	1.47806	0.563708	0.00399511	0.0252177
ENSMUSG00000037685	Atp8a1	1065.99	1124.27	739.567	742.443	1095.13	741.005	1.47786	0.563507	0.00108925	0.00891022
ENSMUSG00000027829	Ccnl1	2041.02	1669.89	1222.72	1288.41	1855.46	1255.56	1.47784	0.563486	0.00176908	0.0133196
ENSMUSG00000015575	Atp6v0e	2134.2	1798.61	1354.07	1307.53	1966.4	1330.8	1.47769	0.563346	0.0011046	0.00901259
ENSMUSG00000018672	Copz2	745.417	864.562	573.12	516.407	804.989	544.763	1.47769	0.563345	0.00480323	0.0292053
ENSMUSG00000050919	Zfp366	667.769	616.242	401.274	467.722	642.006	434.498	1.47746	0.563119	0.006943	0.0392014
ENSMUSG00000031864	Ints10	545.751	613.964	417.469	367.744	579.858	392.606	1.477	0.562675	0.00854015	0.0461829
ENSMUSG00000067369	Trmt2b	514.692	545.619	353.589	364.267	530.156	358.928	1.47695	0.562622	0.00681227	0.0386142
ENSMUSG00000035992	Fnip1	1162.49	963.661	702.679	737.227	1063.08	719.953	1.47666	0.56234	0.00336767	0.0221381
ENSMUSG00000019923	Zwint	1749.29	2010.48	1251.51	1294.49	1879.88	1273	1.47665	0.562329	0.000815122	0.00709504
ENSMUSG00000038717	Atp5l	1832.48	2214.37	1462.04	1279.71	2023.43	1370.88	1.47601	0.561704	0.00222356	0.015964
ENSMUSG00000020458	Rtn4	6445.86	7456.42	4972.74	4447.7	6951.14	4710.22	1.47576	0.561457	0.000454824	0.00433912
ENSMUSG00000042632	Pla2g6	704.374	791.66	530.833	483.37	748.017	507.102	1.4751	0.560813	0.00464132	0.0284933
ENSMUSG00000061455	Stx17	983.905	1172.11	725.172	736.357	1078.01	730.765	1.47506	0.560774	0.00288084	0.019601
ENSMUSG00000020029	Nudt4	5430.89	5431.13	3678.04	3688.74	5431.01	3683.39	1.47446	0.560185	5.24443e-05	0.000692893
ENSMUSG00000025728	Pigq	1783.68	2030.98	1282.1	1305.8	1907.33	1293.95	1.47397	0.559707	0.000730866	0.00644696
ENSMUSG00000031765	Mt1	973.922	1245.01	734.169	771.132	1109.47	752.651	1.47392	0.559657	0.00549265	0.0325019
ENSMUSG00000025287	Acot9	801.988	695.978	552.426	464.244	748.983	508.335	1.47368	0.559424	0.00775078	0.0428788
ENSMUSG00000019782	Rwdd1	533.55	600.295	392.277	377.307	566.922	384.792	1.47327	0.559018	0.00747807	0.0416331
ENSMUSG00000032540	Abhd5	1771.47	2190.45	1301.89	1387.52	1980.96	1344.7	1.47305	0.558808	0.00213302	0.0154469
ENSMUSG00000074207	Adh1	1647.24	1985.42	1358.57	1107.58	1816.33	1233.08	1.47304	0.5588	0.00424598	0.0265274
ENSMUSG00000028149	Rap1gds1	1301.15	1472.83	898.817	984.998	1386.99	941.907	1.4724	0.558166	0.00160768	0.0122967
ENSMUSG00000025810	Nrp1	3728.19	3447.99	2456.23	2420.33	3588.09	2438.28	1.4716	0.557383	0.000166148	0.00187288
ENSMUSG00000054814	Usp46	712.139	758.627	450.758	548.573	735.383	499.666	1.47149	0.557282	0.00723953	0.0406017
ENSMUSG00000059890	Ube4a	2089.83	2371.56	1439.55	1593.56	2230.7	1516.55	1.4708	0.5566	0.000920633	0.00777086
ENSMUSG00000036932	Aifm1	831.938	978.47	612.707	618.123	905.204	615.415	1.47076	0.556565	0.00376764	0.024156
ENSMUSG00000024646	Cyb5a	3333.3	4287.5	2719.84	2463.8	3810.4	2591.82	1.47014	0.555957	0.00254229	0.0176992
ENSMUSG00000059355	Wdr83os	572.373	595.739	412.97	381.654	584.056	397.312	1.47009	0.555905	0.00635272	0.0364513
ENSMUSG00000074364	Ehd2	12868.4	14836.5	8838.82	10008.2	13852.5	9423.51	1.46997	0.555785	0.000452435	0.00432152
ENSMUSG00000028076	Cd1d1	4058.75	3843.26	2321.27	3054.97	3951	2688.12	1.46974	0.555563	0.00280856	0.0191997
ENSMUSG00000039063	Echdc3	472.541	496.639	322.998	336.447	484.59	329.723	1.46958	0.555399	0.00925221	0.049248
ENSMUSG00000026775	Yme1l1	2254	2166.53	1500.73	1509.23	2210.26	1504.98	1.46865	0.554489	0.000272756	0.00285585
ENSMUSG00000037916	Ndufv1	2364.92	2856.81	1879.51	1678.76	2610.87	1779.13	1.46749	0.55335	0.0017896	0.0134232
ENSMUSG00000027808	Serp1	3531.85	4142.83	2589.39	2640.28	3837.34	2614.83	1.46749	0.553346	0.000554445	0.00512346
ENSMUSG00000030095	Tmem43	3419.82	3915.02	2410.34	2589.86	3667.42	2500.1	1.46685	0.552721	0.000520138	0.00485848
ENSMUSG00000020952	Scfd1	785.35	820.137	572.22	523.361	802.744	547.791	1.46549	0.551383	0.0034647	0.0226151
ENSMUSG00000041303	Gtf3c3	602.323	577.513	394.976	410.343	589.918	402.659	1.46504	0.550941	0.00609703	0.0353156
ENSMUSG00000030629	Zfand6	2421.49	2030.98	1573.6	1465.76	2226.24	1519.68	1.46503	0.550931	0.00147389	0.0114162
ENSMUSG00000024507	Hsd17b4	3860.19	4399.13	2835.91	2801.98	4129.66	2818.95	1.46494	0.550841	0.000349047	0.00350458
ENSMUSG00000029094	Afap1	1897.93	2453.58	1383.76	1586.6	2175.75	1485.18	1.46485	0.55075	0.00489471	0.0296593
ENSMUSG00000055943	Emc7	1488.61	1630.02	1067.06	1062.37	1559.32	1064.72	1.46449	0.5504	0.000842489	0.00727374
ENSMUSG00000032336	Nptn	2874.07	3159.81	2009.07	2112.57	3016.94	2060.82	1.4639	0.549813	0.000356989	0.00356854
ENSMUSG00000028469	Npr2	1495.27	1493.33	1038.27	1004.12	1494.3	1021.2	1.46331	0.549237	0.000664196	0.00595752
ENSMUSG00000020840	Blmh	1136.98	1133.38	791.751	759.83	1135.18	775.791	1.4633	0.549229	0.00126573	0.0100789
ENSMUSG00000016308	Ube2a	542.424	564.984	403.073	353.834	553.704	378.454	1.46321	0.549134	0.00938737	0.0498339
ENSMUSG00000041653	Pnpla3	5514.09	5272.8	4228.67	3156.69	5393.44	3692.68	1.46063	0.546595	0.00352632	0.022942
ENSMUSG00000024404	Riok3	2445.9	2808.97	1859.71	1741.35	2627.43	1800.53	1.45924	0.545218	0.0008617	0.00741888
ENSMUSG00000064105	Cnnm2	755.4	914.681	552.426	592.042	835.04	572.234	1.45907	0.545047	0.00695725	0.0392401
ENSMUSG00000021832	Psmc6	1558.5	1709.76	1132.74	1108.45	1634.13	1120.6	1.45824	0.544224	0.000913107	0.00773198
ENSMUSG00000040451	Sgms1	1136.98	1085.54	686.484	838.074	1111.26	762.279	1.45768	0.543673	0.00462656	0.0284137
ENSMUSG00000040410	Fbxl4	1000.54	977.33	645.997	711.146	988.937	678.571	1.4573	0.543296	0.00253597	0.0176629
ENSMUSG00000028383	Hsdl2	2908.46	2962.75	1784.14	2248.19	2935.6	2016.17	1.45594	0.541955	0.00233058	0.0165247
ENSMUSG00000023068	Nus1	1613.96	1632.3	1105.75	1124.1	1623.13	1114.92	1.4558	0.541813	0.000632952	0.00573227
ENSMUSG00000027332	Ivd	5796.94	5240.91	3602.47	3980.85	5518.93	3791.66	1.45554	0.54155	0.000412457	0.00399975
ENSMUSG00000021282	Eif5	5443.09	4894.63	3619.56	3484.44	5168.86	3552	1.45523	0.541246	0.000275864	0.00287703
ENSMUSG00000041236	Vps41	1694.94	1575.35	1139.04	1108.45	1635.14	1123.74	1.45514	0.54116	0.000847581	0.00730556
ENSMUSG00000024140	Epas1	8933.91	9378.04	6458.17	6127.33	9155.97	6292.75	1.45501	0.541027	9.9932e-05	0.00120601
ENSMUSG00000001687	Ubl3	2207.41	2308.91	1572.71	1531.83	2258.16	1552.27	1.45475	0.540768	0.000395398	0.00387744
ENSMUSG00000044252	Osbpl1a	1280.08	1149.33	805.247	865.024	1214.7	835.136	1.4545	0.540523	0.00223537	0.0160402
ENSMUSG00000040774	Cept1	1053.79	1071.87	706.278	755.484	1062.83	730.881	1.4541	0.540124	0.00196002	0.0144292
ENSMUSG00000034211	Mrps17	841.921	921.516	594.713	618.123	881.718	606.418	1.45387	0.539895	0.00342172	0.022399
ENSMUSG00000021361	Tmem14c	1107.03	1357.78	904.216	792.867	1232.41	848.541	1.45238	0.538418	0.00621251	0.0358149
ENSMUSG00000040181	Fmo1	2969.46	3196.26	2356.36	1890.01	3082.86	2123.19	1.45206	0.538097	0.00244266	0.0171331
ENSMUSG00000033964	Zbtb41	950.628	906.708	640.598	638.988	928.668	639.793	1.45155	0.537596	0.00255162	0.0177563
ENSMUSG00000052712	BC004004	1337.76	1799.75	1058.97	1105.84	1568.75	1082.4	1.4492	0.535254	0.00854561	0.0461829
ENSMUSG00000032038	St3gal4	740.98	856.588	574.019	528.578	798.784	551.299	1.4489	0.534953	0.00674489	0.038328
ENSMUSG00000051154	Commd3	990.561	1079.85	776.456	653.767	1035.2	715.111	1.44771	0.533772	0.00541858	0.0321835
ENSMUSG00000027367	Stard7	1850.23	2106.16	1320.78	1412.73	1978.19	1366.76	1.44727	0.533335	0.00142429	0.0110914
ENSMUSG00000026991	Pkp4	2259.54	1985.42	1364.87	1568.35	2122.48	1466.61	1.44718	0.533241	0.00217406	0.015671
ENSMUSG00000030879	Mrpl17	986.124	1211.98	805.247	713.754	1099.05	759.5	1.44706	0.533122	0.00742505	0.0413938
ENSMUSG00000028713	Cyp4b1	1338.87	1250.71	825.94	964.133	1294.79	895.036	1.44655	0.532614	0.0032602	0.021612
ENSMUSG00000030104	Edem1	3184.66	2901.24	1971.28	2239.5	3042.95	2105.39	1.44529	0.531356	0.00106235	0.00873515
ENSMUSG00000026463	Atp2b4	3819.15	3211.07	2222.3	2656.8	3515.11	2439.55	1.44087	0.526937	0.0032607	0.021612
ENSMUSG00000020044	Timp3	4615.59	5141.81	3123.82	3653.1	4878.7	3388.46	1.43974	0.52581	0.00133574	0.0105048
ENSMUSG00000021846	Peli2	1100.38	1096.93	718.874	807.646	1098.66	763.26	1.43932	0.525385	0.00317303	0.0211722
ENSMUSG00000044308	Ubr3	3075.95	3458.25	2141.33	2400.33	3267.1	2270.83	1.43865	0.524717	0.00124034	0.00992645
ENSMUSG00000021824	Ap3m1	1176.92	1194.89	815.144	833.727	1185.9	824.435	1.43841	0.524478	0.00180063	0.0134869
ENSMUSG00000032412	Atp1b3	2435.91	2968.44	2004.57	1754.39	2702.18	1879.48	1.43773	0.523788	0.00372848	0.0239817
ENSMUSG00000028986	Klhl7	853.014	878.231	628.002	576.393	865.622	602.198	1.43751	0.523573	0.004467	0.0275508
ENSMUSG00000040044	Orc3	987.233	943.158	690.083	652.898	965.196	671.49	1.43749	0.523547	0.00328233	0.0216835
ENSMUSG00000053062	Jam2	1967.81	1770.13	1244.31	1356.22	1868.97	1300.26	1.43737	0.523431	0.00168965	0.0128005
ENSMUSG00000024601	Isoc1	4289.47	4236.24	2789.12	3144.52	4262.86	2966.82	1.43681	0.522866	0.000570577	0.00524205
ENSMUSG00000019326	Aoc3	17608.2	19495.4	12251.4	13575.2	18551.8	12913.3	1.43662	0.522683	0.000427307	0.00411613
ENSMUSG00000078578	Ube2d3	5357.68	5333.17	3712.23	3731.34	5345.43	3721.79	1.43625	0.522309	0.000163903	0.00185151
ENSMUSG00000035885	Cox8a	5576.2	5957.39	4392.42	3649.62	5766.8	4021.02	1.43419	0.520238	0.00152025	0.0117295
ENSMUSG00000025085	Ablim1	4535.73	4295.47	3163.4	2994.98	4415.6	3079.19	1.43404	0.520088	0.000341564	0.00344468
ENSMUSG00000027007	Itprid2	1425.39	1636.86	972.594	1164.09	1531.12	1068.34	1.43301	0.519052	0.00572815	0.0335953
ENSMUSG00000002108	Nr1h3	1054.9	1278.05	756.662	871.979	1166.47	814.321	1.43225	0.518287	0.00858683	0.0463276
ENSMUSG00000032067	Pts	993.889	934.045	652.295	694.628	963.967	673.461	1.43134	0.517368	0.00396624	0.0250796
ENSMUSG00000018761	Mpdu1	1100.38	1387.4	900.617	838.074	1243.89	869.345	1.43077	0.516796	0.00848402	0.0459594
ENSMUSG00000028121	Bcar3	809.753	710.786	531.733	531.186	760.269	531.459	1.43063	0.516655	0.00782202	0.0431378
ENSMUSG00000037999	Arap2	823.064	803.051	555.125	581.609	813.058	568.367	1.43048	0.516499	0.00496618	0.0299781
ENSMUSG00000033917	Gde1	1892.38	2316.89	1435.95	1506.62	2104.64	1471.28	1.43038	0.516402	0.00367794	0.0237084
ENSMUSG00000020516	Rps6kb1	1183.57	1451.19	909.614	932.835	1317.38	921.225	1.42991	0.515929	0.00587546	0.034257
ENSMUSG00000024588	Fech	1747.07	2012.75	1281.2	1351	1879.91	1316.1	1.42831	0.514305	0.00234205	0.0165811
ENSMUSG00000005262	Ufd1	1039.37	1185.78	809.745	748.529	1112.58	779.137	1.42795	0.513943	0.00496452	0.0299781
ENSMUSG00000029173	Sepsecs	752.072	841.78	535.332	581.609	796.926	558.47	1.42681	0.51279	0.00799705	0.0438551
ENSMUSG00000026021	Sumo1	1186.9	1135.66	834.038	794.605	1161.28	814.321	1.42615	0.512122	0.00270858	0.0186526
ENSMUSG00000060681	Slc9a6	1070.43	1226.79	804.347	806.776	1148.61	805.562	1.42576	0.511734	0.00432434	0.0269322
ENSMUSG00000021959	Lats2	701.047	726.733	487.647	513.798	713.89	500.722	1.42562	0.511593	0.00725248	0.0406599
ENSMUSG00000024661	Fth1	25442.9	28518	18629.5	19227	26980.4	18928.3	1.4254	0.511364	0.000339496	0.00342817
ENSMUSG00000053819	Camk2d	1853.56	1614.08	1199.32	1234.51	1733.82	1216.91	1.42481	0.510767	0.00251813	0.0175695
ENSMUSG00000030861	Acadsb	4793.07	4362.68	3187.7	3240.15	4577.87	3213.92	1.4244	0.510359	0.000527179	0.00491148
ENSMUSG00000026229	Psmd1	1964.48	2214.37	1510.62	1423.16	2089.43	1466.89	1.42438	0.51033	0.00185677	0.0137763
ENSMUSG00000024614	Tmx3	1815.84	1505.86	1218.22	1114.53	1660.85	1166.38	1.42407	0.510021	0.00509529	0.030618
ENSMUSG00000006699	Cdc42	7363.21	7459.83	5529.66	4879.78	7411.52	5204.72	1.42402	0.509972	0.00058503	0.00535626
ENSMUSG00000061904	Slc25a3	7328.82	8326.67	5818.47	5184.93	7827.75	5501.7	1.42279	0.508724	0.00119351	0.00961953
ENSMUSG00000076435	Acsf2	1405.42	1600.41	1047.27	1065.85	1502.91	1056.56	1.42238	0.508308	0.00292695	0.0198453
ENSMUSG00000029207	Apbb2	1057.12	1169.83	795.35	770.263	1113.48	782.806	1.42238	0.508306	0.00393394	0.0249406
ENSMUSG00000029571	Tmem106b	2999.41	2806.69	1920.9	2166.47	2903.05	2043.68	1.42047	0.506366	0.00146243	0.0113385
ENSMUSG00000053398	Phgdh	2209.63	2805.55	1675.27	1856.11	2507.59	1765.69	1.42008	0.50597	0.00661835	0.0377303
ENSMUSG00000047459	Dynlrb1	1673.86	1846.45	1299.19	1181.48	1760.15	1240.33	1.41911	0.504991	0.00262762	0.0182134
ENSMUSG00000032563	Mrpl3	879.636	822.416	615.406	584.217	851.026	599.812	1.41893	0.504803	0.00612195	0.0354213
ENSMUSG00000063077	Kif1b	6079.8	6849.29	4306.95	4812.84	6464.55	4559.89	1.41766	0.503509	0.00126771	0.0100896
ENSMUSG00000022403	St13	4066.51	4302.3	2859.3	3046.28	4184.41	2952.79	1.41707	0.502909	0.000605942	0.00551911
ENSMUSG00000000594	Gm2a	4262.85	4280.66	2962.77	3069.75	4271.76	3016.26	1.41623	0.502055	0.000400311	0.0039106
ENSMUSG00000019873	Reep3	3075.95	2723.54	1943.39	2154.3	2899.75	2048.85	1.4153	0.501108	0.00212914	0.0154382
ENSMUSG00000037712	Fermt2	3856.87	3017.42	2546.2	2311.66	3437.14	2428.93	1.41516	0.500964	0.00632419	0.0363505
ENSMUSG00000020676	Ccl11	801.988	804.19	565.022	570.308	803.089	567.665	1.41471	0.500507	0.00616766	0.035621
ENSMUSG00000031232	Magt1	1488.61	1336.14	1056.27	941.529	1412.38	998.898	1.41407	0.499855	0.00464402	0.0284989
ENSMUSG00000036309	Skp1	3663.86	3717.96	2718.04	2502.92	3690.91	2610.48	1.41391	0.499687	0.000730931	0.00644696
ENSMUSG00000036282	Naa30	848.577	862.283	612.707	598.127	855.43	605.417	1.41297	0.498735	0.0056804	0.0333892
ENSMUSG00000060073	Psma3	1508.58	1762.16	1234.41	1080.63	1635.37	1157.52	1.41284	0.498593	0.00608752	0.0352735
ENSMUSG00000026687	Aldh9a1	1619.51	1878.34	1209.22	1267.54	1748.92	1238.38	1.41217	0.497918	0.00362949	0.0234596
ENSMUSG00000025907	Rb1cc1	1498.6	1331.58	922.21	1082.37	1415.09	1002.29	1.41181	0.497545	0.0068399	0.0387328
ENSMUSG00000018677	Slc25a39	2982.78	3717.96	2544.4	2207.33	3350.37	2375.87	1.41016	0.495861	0.00683918	0.0387328
ENSMUSG00000027709	Mccc1	2522.44	2369.29	1686.07	1783.08	2445.86	1734.57	1.41006	0.495753	0.00128426	0.0101907
ENSMUSG00000037669	Ldah	1581.79	1533.2	1042.77	1166.7	1557.5	1104.73	1.40977	0.495464	0.00312145	0.0208894
ENSMUSG00000034210	Efcab14	1398.77	1402.21	975.293	1011.95	1400.49	993.621	1.40945	0.495127	0.00237058	0.0167532
ENSMUSG00000021102	Glrx5	1400.98	1561.68	1156.14	947.615	1481.33	1051.88	1.40835	0.494004	0.00872422	0.0468772
ENSMUSG00000038855	Itpkb	2341.63	2829.47	1811.13	1860.45	2585.55	1835.79	1.40835	0.494001	0.00385524	0.0246085
ENSMUSG00000056121	Fez2	1031.6	1068.46	758.461	732.88	1050.03	745.671	1.40818	0.49383	0.004309	0.0268577
ENSMUSG00000022205	Sub1	1140.31	1118.58	869.127	735.488	1129.44	802.307	1.40789	0.493534	0.00747722	0.0416331
ENSMUSG00000021557	Agtpbp1	827.501	813.303	568.621	598.997	820.402	583.809	1.40521	0.490789	0.00739428	0.0412657
ENSMUSG00000005534	Insr	3640.56	3445.72	2361.76	2681.14	3543.14	2521.45	1.40517	0.490742	0.00173563	0.0130926
ENSMUSG00000029152	Ociad1	2502.47	2666.59	1811.13	1868.28	2584.53	1839.7	1.40482	0.490386	0.0012099	0.00974175
ENSMUSG00000027104	Atf2	1308.92	1258.68	895.218	932.835	1283.8	914.027	1.40454	0.490099	0.00327467	0.0216594
ENSMUSG00000030513	Pcsk6	1804.75	1878.34	1192.12	1434.46	1841.55	1313.29	1.40212	0.48761	0.00563912	0.0332202
ENSMUSG00000013662	Atad1	1754.83	1418.15	1133.64	1131.05	1586.49	1132.35	1.40115	0.486615	0.00821257	0.0448867
ENSMUSG00000015994	Fnta	1494.16	1716.59	1155.24	1137.14	1605.38	1146.19	1.40057	0.486014	0.00433743	0.0269715
ENSMUSG00000022905	Kpna1	1166.93	1140.22	855.631	792.867	1153.58	824.249	1.39963	0.485047	0.00478869	0.0291615
ENSMUSG00000022197	Pdzd2	3809.17	3991.34	2459.83	3113.22	3900.25	2786.52	1.39962	0.485031	0.00605028	0.0350832
ENSMUSG00000021000	Mia2	1763.71	1948.97	1272.2	1382.3	1856.34	1327.25	1.39854	0.483923	0.00346315	0.0226144
ENSMUSG00000021484	Lman2	4646.65	5440.25	3425.22	3786.98	5043.45	3606.1	1.39854	0.48392	0.0029649	0.0200614
ENSMUSG00000017686	Rhot1	1111.47	1246.15	842.135	845.029	1178.81	843.582	1.39732	0.482659	0.0058679	0.0342413
ENSMUSG00000041268	Dmxl2	859.669	871.396	628.902	610.299	865.533	619.6	1.39694	0.482273	0.0072941	0.0407544
ENSMUSG00000020873	Slc35b1	797.551	798.495	571.32	572.916	798.023	572.118	1.39485	0.480113	0.00859482	0.0463492
ENSMUSG00000066324	Bpnt2	2220.72	2143.75	1580.8	1553.57	2182.23	1567.18	1.39248	0.477657	0.00168445	0.0127671
ENSMUSG00000013160	Atp6v0d1	1841.36	2057.18	1390.96	1410.12	1949.27	1400.54	1.39174	0.47689	0.00320464	0.0213383
ENSMUSG00000037720	Tmem33	1329.99	1309.94	960.898	936.313	1319.97	948.605	1.39151	0.476654	0.00369966	0.0238163
ENSMUSG00000027276	Jag1	1810.3	1828.22	1280.3	1334.48	1819.26	1307.39	1.39149	0.476627	0.00227701	0.0162875
ENSMUSG00000062014	Gmfb	2060.99	2050.34	1500.73	1456.2	2055.67	1478.46	1.39043	0.47553	0.00186371	0.0138161
ENSMUSG00000029772	Ahcyl2	2957.26	3228.15	2265.49	2183.86	3092.71	2224.67	1.39017	0.475265	0.00172045	0.0129843
ENSMUSG00000033863	Klf9	2909.56	3009.45	2067.55	2190.82	2959.51	2129.18	1.38994	0.475018	0.00142264	0.011084
ENSMUSG00000001833	Septin7	3164.69	2759.99	2345.56	1917.83	2962.34	2131.7	1.38976	0.474833	0.00845815	0.0458505
ENSMUSG00000031703	Itfg1	1684.95	1659.64	1251.51	1155.39	1672.3	1203.45	1.38965	0.474719	0.003271	0.0216531
ENSMUSG00000025477	Inpp5a	1324.45	1348.67	1042.77	881.542	1336.56	962.157	1.38924	0.474291	0.00829419	0.0452861
ENSMUSG00000041685	Fcho2	2106.47	1816.83	1377.47	1448.37	1961.65	1412.92	1.3884	0.473419	0.00503455	0.0302998
ENSMUSG00000022314	Rad21	3160.26	2872.76	2136.83	2209.94	3016.51	2173.38	1.38795	0.472951	0.00196631	0.0144357
ENSMUSG00000022051	Bnip3l	2521.33	2779.35	1771.54	2049.11	2650.34	1910.33	1.38729	0.472268	0.00474618	0.0289581
ENSMUSG00000024581	Napg	902.93	996.695	690.083	679.848	949.812	684.966	1.3866	0.471555	0.00912253	0.0486555
ENSMUSG00000026860	Sh3glb2	2425.93	2752.02	1812.93	1921.31	2588.97	1867.12	1.38655	0.471496	0.00339463	0.0222584
ENSMUSG00000020610	Amz2	924.006	1005.81	692.782	698.974	964.907	695.878	1.38653	0.471483	0.00834559	0.0454575
ENSMUSG00000020189	Osbpl8	1339.97	1209.7	967.196	871.979	1274.84	919.588	1.38645	0.471395	0.00779061	0.0430243
ENSMUSG00000020530	Ggnbp2	1754.83	1770.13	1240.71	1302.32	1762.48	1271.51	1.38609	0.471022	0.00275263	0.0188823
ENSMUSG00000020253	Ppm1m	1483.07	1514.98	1021.18	1142.35	1499.02	1081.77	1.38563	0.470538	0.00512102	0.0307145
ENSMUSG00000007097	Atp1a2	16452.4	14707.8	10857.8	11637.4	15580.1	11247.6	1.3852	0.470089	0.00131601	0.0103702
ENSMUSG00000028879	Stx12	1739.31	1808.86	1289.29	1272.76	1774.08	1281.03	1.38488	0.469761	0.0027139	0.018673
ENSMUSG00000024006	Stk38	2249.56	2443.33	1687.87	1703.97	2346.44	1695.92	1.38355	0.46837	0.00243091	0.0170733
ENSMUSG00000034636	Zyg11b	2083.17	1977.44	1387.36	1548.35	2030.31	1467.86	1.38314	0.467944	0.00393921	0.024964
ENSMUSG00000063015	Ccni	6981.62	5939.16	4446.4	4901.51	6460.39	4673.96	1.38221	0.46698	0.00385144	0.0245942
ENSMUSG00000020176	Grb10	2080.95	2172.23	1489.03	1588.34	2126.59	1538.69	1.38203	0.466784	0.00271591	0.0186788
ENSMUSG00000061838	Suclg2	1534.09	1317.92	1002.28	1061.5	1426	1031.89	1.38196	0.46672	0.00833431	0.0454116
ENSMUSG00000073725	Lmbrd1	1613.96	1643.69	1106.65	1251.03	1628.83	1178.84	1.38163	0.466373	0.00533617	0.0318129
ENSMUSG00000054604	Cggbp1	2300.59	2225.76	1525.92	1750.91	2263.17	1638.42	1.38126	0.465986	0.00436912	0.0270943
ENSMUSG00000029648	Flt1	2238.47	2474.08	1750.85	1665.72	2356.27	1708.28	1.37931	0.46395	0.00334916	0.0220488
ENSMUSG00000034432	Cops8	1093.72	1045.68	794.45	757.222	1069.7	775.836	1.37884	0.463458	0.00742085	0.0413849
ENSMUSG00000019795	Pcmt1	1081.52	1214.26	837.636	828.511	1147.89	833.074	1.37784	0.462404	0.00863353	0.0464842
ENSMUSG00000011958	Bnip2	1568.48	1835.06	1248.81	1221.47	1701.77	1235.14	1.37774	0.462308	0.00720777	0.0404521
ENSMUSG00000025103	Btbd1	2072.08	2041.23	1478.23	1507.49	2056.66	1492.86	1.37765	0.462213	0.00244884	0.0171689
ENSMUSG00000006262	Mob1b	1246.8	1284.88	906.015	932.835	1265.84	919.425	1.37673	0.461245	0.00543361	0.0322607
ENSMUSG00000041720	Pi4ka	1761.49	2098.18	1389.16	1416.21	1929.84	1402.68	1.37574	0.46021	0.00768725	0.0426163
ENSMUSG00000036879	Phkb	1613.96	1614.08	1211.92	1137.14	1614.02	1174.53	1.37423	0.458623	0.00426293	0.0266228
ENSMUSG00000053898	Ech1	4837.44	5175.98	3466.61	3833.93	5006.71	3650.27	1.37156	0.455819	0.00241312	0.0169859
ENSMUSG00000033953	Ppp3r1	1795.88	1964.91	1365.77	1379.69	1880.39	1372.73	1.36977	0.453938	0.00446436	0.0275452
ENSMUSG00000020859	Spag9	4285.04	4010.7	3106.72	2953.25	4147.87	3029.99	1.36897	0.453092	0.00197109	0.0144504
ENSMUSG00000027893	Ahcyl1	3418.71	3647.33	2580.39	2586.38	3533.02	2583.38	1.36758	0.451621	0.00200185	0.0146354
ENSMUSG00000079614	Seh1l	1444.24	1325.89	998.686	1027.6	1385.07	1013.14	1.36713	0.451147	0.00695392	0.0392352
ENSMUSG00000064215	Ifi27	7110.3	7040.65	4807.19	5549.2	7075.47	5178.19	1.36637	0.450352	0.00301418	0.0203084
ENSMUSG00000042444	Mindy2	1463.1	1495.61	1051.77	1113.66	1479.36	1082.72	1.36628	0.450256	0.00559197	0.0329914
ENSMUSG00000036503	Rnf13	2240.69	2083.38	1517.82	1649.2	2162.03	1583.51	1.36533	0.449245	0.00482465	0.0292907
ENSMUSG00000016319	Slc25a5	4239.56	5047.26	3436.92	3365.34	4643.41	3401.13	1.36523	0.449144	0.00530334	0.0316528
ENSMUSG00000020608	Smc6	1376.58	1276.91	935.706	1008.47	1326.74	972.088	1.36482	0.448715	0.00838484	0.0455619
ENSMUSG00000006273	Atp6v1b2	1991.11	2263.35	1529.52	1590.95	2127.23	1560.23	1.36334	0.44714	0.00618613	0.0357017
ENSMUSG00000020078	Vps26a	1536.31	1594.71	1152.54	1144.96	1565.51	1148.75	1.36278	0.446554	0.00509931	0.0306306
ENSMUSG00000033382	Trappc8	1498.6	1492.19	1043.67	1156.26	1495.4	1099.97	1.35942	0.442992	0.0077738	0.0429763
ENSMUSG00000085438	Oip5os1	4262.85	3926.41	3056.34	2977.6	4094.63	3016.97	1.35723	0.440664	0.00270025	0.0186275
ENSMUSG00000037003	Tns2	3321.1	3208.79	2248.39	2562.91	3264.94	2405.65	1.35716	0.44059	0.00500347	0.0301574
ENSMUSG00000020124	Usp15	1367.71	1381.7	1010.38	1016.29	1374.7	1013.34	1.3566	0.439994	0.00665879	0.0379336
ENSMUSG00000081534	Slc48a1	2685.5	3060.71	2078.35	2157.78	2873.1	2118.06	1.35642	0.439807	0.00561341	0.0331056
ENSMUSG00000006373	Pgrmc1	2943.95	3312.44	2329.37	2289.05	3128.2	2309.21	1.35463	0.437904	0.00468858	0.0287058
ENSMUSG00000021585	Cast	2769.8	2698.48	2045.96	1991.73	2734.14	2018.84	1.35433	0.437582	0.00304232	0.0204546
ENSMUSG00000022186	Oxct1	4016.6	3452.55	2844.9	2671.58	3734.57	2758.24	1.35402	0.43725	0.0065238	0.0372345
ENSMUSG00000024286	Ccny	2560.15	2378.4	1738.25	1930.87	2469.27	1834.56	1.34595	0.428626	0.00727709	0.0407261
ENSMUSG00000031987	Egln1	2086.5	2195.01	1564.61	1617.9	2140.75	1591.25	1.34529	0.427912	0.0053622	0.0319202
ENSMUSG00000005981	Trap1	2653.33	2626.72	1993.77	1940.44	2640.02	1967.1	1.3421	0.424495	0.00407409	0.0256653
ENSMUSG00000014353	Tmem87b	1514.13	1602.69	1166.93	1158.87	1558.41	1162.9	1.34008	0.422315	0.00854437	0.0461829
ENSMUSG00000027782	Kpna4	2328.32	2083.38	1595.2	1699.62	2205.85	1647.41	1.33899	0.421143	0.00912746	0.0486655
ENSMUSG00000029621	Arpc1a	2359.38	2246.27	1749.05	1691.8	2302.82	1720.42	1.33856	0.420678	0.00568386	0.0333971
ENSMUSG00000016481	Cr1l	1516.35	1508.14	1105.75	1157.13	1512.24	1131.44	1.33653	0.418495	0.00914939	0.048766
ENSMUSG00000001946	Esam	1721.56	1681.28	1289.29	1258.85	1701.42	1274.07	1.33545	0.417322	0.00781432	0.0431103
ENSMUSG00000020741	Cluh	6310.53	5672.62	4457.2	4562.46	5991.57	4509.83	1.32857	0.409875	0.00521779	0.0312477
ENSMUSG00000022698	Naa50	2531.31	2624.44	2025.26	1876.97	2577.88	1951.12	1.32125	0.401906	0.00845608	0.0458505
ENSMUSG00000029110	Rnf4	2173.02	2131.22	1595.2	1668.32	2152.12	1631.76	1.31888	0.399311	0.00882036	0.0473458
ENSMUSG00000012428	Steap4	9516.26	10480.7	8043.47	7154.93	9998.47	7599.2	1.31573	0.395866	0.00901708	0.0482639
ENSMUSG00000015733	Capza2	2820.82	2626.72	2034.26	2109.96	2723.77	2072.11	1.3145	0.394512	0.00909387	0.0485679
ENSMUSG00000020149	Rab1a	3444.22	3588.1	2583.09	2768.08	3516.16	2675.58	1.31413	0.39411	0.00763426	0.0423697
ENSMUSG00000019820	Utrn	5476.37	5563.27	4229.57	4198.19	5519.82	4213.88	1.30991	0.38947	0.00481529	0.0292562
ENSMUSG00000063856	Gpx1	6886.23	7057.74	5310.13	5339.68	6971.98	5324.9	1.30931	0.388808	0.0044373	0.0274315
ENSMUSG00000020671	Rab10	3123.65	3158.67	2470.62	2335.13	3141.16	2402.88	1.30727	0.386555	0.00844387	0.0458044
ENSMUSG00000026878	Rab14	3430.91	3540.26	2646.07	2696.79	3485.59	2671.43	1.30475	0.383772	0.00764945	0.0424364
ENSMUSG00000020717	Pecam1	4509.1	4737.43	3428.82	3670.49	4623.27	3549.65	1.30243	0.381203	0.00865511	0.0465689
ENSMUSG00000027111	Itga6	4024.36	4075.63	3042.84	3180.16	4049.99	3111.5	1.3016	0.38029	0.00767142	0.0425435
ENSMUSG00000022878	Adipoq	23123.4	23229.3	17480.6	18628	23176.3	18054.3	1.2837	0.360305	0.00752693	0.0418365
ENSMUSG00000048154	Kmt2d	3003.85	3138.16	4031.63	3960.86	3071.01	3996.24	-1.30129	-0.379943	0.00786317	0.0432747
ENSMUSG00000032399	Rpl4	10093.1	10701.7	14053.6	13138.8	10397.4	13596.2	-1.30766	-0.386986	0.00556438	0.0328652
ENSMUSG00000042626	Shc1	1420.95	1432.96	1877.71	1894.36	1426.96	1886.03	-1.32173	-0.402425	0.00892926	0.0478495
ENSMUSG00000028936	Rpl22	2847.45	2780.49	3970.45	3488.79	2813.97	3729.62	-1.32536	-0.40638	0.00869621	0.0467425
ENSMUSG00000049470	Aff4	3525.2	3278.27	4386.12	4659.83	3401.74	4522.97	-1.3296	-0.410993	0.00516251	0.0309517
ENSMUSG00000004043	Stat5a	1487.51	1562.82	2143.13	1938.7	1525.16	2040.91	-1.33815	-0.420236	0.00895648	0.0479792
ENSMUSG00000028032	Papss1	1304.48	1391.96	1854.32	1760.48	1348.22	1807.4	-1.3406	-0.422876	0.00805723	0.0441287
ENSMUSG00000019818	Cd164	15096.9	12913.7	18805	18750.6	14005.3	18777.8	-1.34075	-0.423041	0.00496204	0.0299764
ENSMUSG00000003429	Rps11	3070.41	3510.64	4595.75	4230.36	3290.53	4413.06	-1.34116	-0.42348	0.00729497	0.0407544
ENSMUSG00000041598	Cdc42ep4	1210.19	1360.06	1701.36	1764.82	1285.13	1733.09	-1.34866	-0.43153	0.00912215	0.0486555
ENSMUSG00000024456	Diaph1	1088.18	1173.25	1495.33	1555.31	1130.71	1525.32	-1.34906	-0.431953	0.00841393	0.0456731
ENSMUSG00000017802	Retreg3	1618.4	1794.05	2392.35	2215.16	1706.22	2303.75	-1.35023	-0.433201	0.00712955	0.0400742
ENSMUSG00000038274	Fau	3896.8	4018.67	5574.65	5122.34	3957.74	5348.49	-1.35139	-0.434448	0.00272735	0.0187331
ENSMUSG00000067274	Rplp0	11477.4	11524.1	15988	15102.7	11500.7	15545.3	-1.35168	-0.434751	0.00130492	0.0103238
ENSMUSG00000053644	Aldh7a1	976.141	1037.7	1354.97	1371	1006.92	1362.99	-1.35367	-0.436877	0.00808439	0.0442622
ENSMUSG00000025794	Rpl14	2956.15	3444.58	4602.95	4092.13	3200.37	4347.54	-1.35847	-0.441979	0.00748107	0.0416331
ENSMUSG00000025608	Podxl	1982.23	2074.26	2809.82	2703.74	2028.25	2756.78	-1.3592	-0.442758	0.00301902	0.0203323
ENSMUSG00000058655	Eif4b	3972.23	3782.88	5206.66	5337.07	3877.56	5271.87	-1.35958	-0.443158	0.00167093	0.0126949
ENSMUSG00000058558	Rpl5	6600.04	6246.71	9055.65	8428.55	6423.38	8742.1	-1.36096	-0.444629	0.00170416	0.0128999
ENSMUSG00000020372	Rack1	6984.95	7242.27	9842.9	9530.05	7113.61	9686.48	-1.36168	-0.445392	0.00108757	0.00890107
ENSMUSG00000090862	Rps13	1920.11	2141.47	2636.17	2897.61	2030.79	2766.89	-1.36254	-0.446301	0.00553142	0.0326827
ENSMUSG00000031029	Eif3f	2326.1	2290.69	3037.44	3257.53	2308.39	3147.49	-1.36351	-0.447328	0.00260251	0.0180788
ENSMUSG00000060036	Rpl3	7348.79	7570.32	10526.7	9822.16	7459.56	10174.4	-1.36394	-0.447782	0.00127179	0.0101171
ENSMUSG00000006169	Clint1	1453.12	1320.19	1832.72	1951.74	1386.66	1892.23	-1.36457	-0.44845	0.00585366	0.0342073
ENSMUSG00000028854	Slc9a1	927.334	989.86	1266.8	1351	958.597	1308.9	-1.36552	-0.449453	0.0078853	0.0433664
ENSMUSG00000038467	Chmp4b	1616.18	1974.03	2490.42	2422.07	1795.1	2456.24	-1.36837	-0.452461	0.00906692	0.0484548
ENSMUSG00000009681	Bcr	951.737	952.271	1256	1352.74	952.004	1304.37	-1.37018	-0.454365	0.00673458	0.038283
ENSMUSG00000022892	App	8086.44	9122.89	11377.8	12235.5	8604.66	11806.7	-1.37214	-0.456433	0.00217314	0.015671
ENSMUSG00000078515	Ddi2	1474.19	1323.61	1935.29	1910.01	1398.9	1922.65	-1.37433	-0.45873	0.00450145	0.0277525
ENSMUSG00000046985	Tapt1	1648.35	1606.1	2380.65	2102.14	1627.22	2241.4	-1.37738	-0.461921	0.00427608	0.0266735
ENSMUSG00000060671	Atp8b2	857.451	837.224	1166.93	1169.3	847.337	1168.12	-1.37856	-0.463158	0.00586845	0.0342413
ENSMUSG00000058006	Mdn1	898.493	807.608	1160.63	1193.65	853.05	1177.14	-1.37985	-0.464512	0.00777992	0.0429951
ENSMUSG00000019505	Ubb	5780.31	5770.58	7967.89	7973	5775.44	7970.45	-1.38006	-0.464729	0.000600056	0.00547805
ENSMUSG00000028059	Arhgef2	1197.99	1305.39	1641.98	1812.64	1251.69	1727.31	-1.38008	-0.464754	0.00548574	0.0324852
ENSMUSG00000040725	Hnrnpul1	1596.21	1779.24	2367.16	2292.53	1687.73	2329.84	-1.3805	-0.465195	0.00333899	0.0220025
ENSMUSG00000057133	Chd6	1346.63	1272.35	1634.79	1985.64	1309.49	1810.21	-1.38243	-0.467201	0.00928331	0.049397
ENSMUSG00000029470	P2rx4	782.022	848.614	1070.66	1184.08	815.318	1127.37	-1.38287	-0.467664	0.00891615	0.0478115
ENSMUSG00000004677	Myo9b	1178.02	1182.36	1584.4	1682.23	1180.19	1633.32	-1.38397	-0.468816	0.00344475	0.0225034
ENSMUSG00000004040	Stat3	3082.61	2670	3874.18	4103.43	2876.31	3988.81	-1.38675	-0.471709	0.00289098	0.0196532
ENSMUSG00000007670	Khsrp	1105.92	1196.03	1614.99	1580.52	1150.98	1597.75	-1.38821	-0.47323	0.00362178	0.0234193
ENSMUSG00000025967	Eef1b2	2623.38	2895.54	4095.51	3573.12	2759.46	3834.31	-1.38952	-0.474582	0.00331974	0.0218938
ENSMUSG00000048277	Syngr2	1081.52	1050.23	1548.41	1417.08	1065.88	1482.74	-1.39103	-0.476159	0.00417868	0.0261996
ENSMUSG00000030744	Rps3	6565.66	6591.85	9617.07	8685.89	6578.76	9151.48	-1.39105	-0.476179	0.000890102	0.0075876
ENSMUSG00000060739	Nsa2	808.644	852.032	1121.05	1189.3	830.338	1155.17	-1.39129	-0.476426	0.00563375	0.0332009
ENSMUSG00000034902	Pip5k1c	908.476	1095.79	1404.46	1385.78	1002.14	1395.12	-1.39226	-0.477427	0.00861911	0.0464223
ENSMUSG00000032178	Ilf3	752.072	754.071	1033.77	1063.24	753.071	1048.51	-1.39233	-0.477503	0.00557941	0.0329418
ENSMUSG00000038648	Creb3l2	1314.46	1167.56	1677.07	1779.6	1241.01	1728.34	-1.39264	-0.477824	0.00432698	0.0269328
ENSMUSG00000033545	Znrf1	728.778	788.243	1030.18	1086.71	758.51	1058.44	-1.39553	-0.480816	0.00649477	0.0371056
ENSMUSG00000048000	Gigyf2	982.796	903.29	1334.28	1306.66	943.043	1320.47	-1.40015	-0.485577	0.00397342	0.0251008
ENSMUSG00000037410	Tbc1d2b	1144.75	1062.76	1485.43	1607.47	1103.75	1546.45	-1.40107	-0.486531	0.003564	0.0231398
ENSMUSG00000060586	H2-Eb1	4028.8	3255.49	5013.22	5205.79	3642.14	5109.51	-1.40285	-0.488357	0.00386173	0.024639
ENSMUSG00000028234	Rps20	3549.6	3940.08	5831.97	4688.52	3744.84	5260.24	-1.40465	-0.490215	0.00508464	0.0305655
ENSMUSG00000109324	Prmt1	878.527	823.555	1274	1118.88	851.041	1196.44	-1.40573	-0.491319	0.00623131	0.0359102
ENSMUSG00000027087	Itgav	1371.03	1132.25	1674.37	1847.41	1251.64	1760.89	-1.40681	-0.492426	0.00686173	0.0388253
ENSMUSG00000024913	Lrp5	2130.87	2004.78	2908.78	2914.13	2067.83	2911.46	-1.40795	-0.493599	0.000907531	0.0077094
ENSMUSG00000022895	Ets2	2009.96	2099.32	2960.07	2838.5	2054.64	2899.28	-1.41109	-0.496814	0.000845575	0.00729222
ENSMUSG00000014498	Ankrd52	928.443	938.602	1279.4	1357.09	933.522	1318.24	-1.41216	-0.497907	0.00279153	0.0190995
ENSMUSG00000074102	Rbm15b	637.819	735.846	940.204	1000.65	686.832	970.425	-1.41307	-0.498831	0.0078781	0.0433418
ENSMUSG00000041308	Sntb2	1645.02	1434.1	2168.32	2193.42	1539.56	2180.87	-1.41649	-0.502317	0.00214076	0.0154801
ENSMUSG00000046722	Cdc42se1	985.015	1053.65	1480.93	1415.34	1019.33	1448.14	-1.4207	-0.506599	0.00222317	0.015964
ENSMUSG00000024050	Wiz	686.626	758.627	1004.98	1048.46	722.627	1026.72	-1.42094	-0.506848	0.00473347	0.0289361
ENSMUSG00000006205	Htra1	3469.74	3086.91	4798.19	4524.21	3278.32	4661.2	-1.42178	-0.507698	0.000880201	0.00753767
ENSMUSG00000040463	Mybbp1a	1287.84	1243.88	1767.04	1833.5	1265.86	1800.27	-1.42217	-0.508096	0.00124999	0.0099836
ENSMUSG00000015143	Actn1	1249.02	1224.51	1796.73	1725.7	1236.76	1761.22	-1.42402	-0.509969	0.00121601	0.00976696
ENSMUSG00000045128	Rpl18a	5287.8	5505.17	7761.86	7608.74	5396.49	7685.3	-1.42414	-0.510087	0.000207138	0.00226739
ENSMUSG00000021998	Lcp1	1315.57	1084.4	1642.88	1775.26	1199.99	1709.07	-1.42416	-0.510116	0.00491513	0.0297604
ENSMUSG00000025150	Cbr2	686.626	595.739	915.012	911.97	641.182	913.491	-1.42456	-0.510517	0.00660359	0.0376597
ENSMUSG00000071054	Safb	1039.37	1164.14	1615.89	1530.09	1101.75	1572.99	-1.42777	-0.513761	0.00235712	0.0166729
ENSMUSG00000045193	Cirbp	864.106	763.183	1129.14	1194.52	813.645	1161.83	-1.42786	-0.513859	0.00408574	0.0257285
ENSMUSG00000025047	Pdcd11	554.625	608.269	776.456	885.889	581.447	831.172	-1.42968	-0.515689	0.00824073	0.0450251
ENSMUSG00000027067	Ssrp1	1029.38	1119.72	1542.11	1531.83	1074.55	1536.97	-1.4304	-0.51642	0.0016737	0.0127099
ENSMUSG00000046330	Rpl37a	2885.16	3249.79	4659.63	4128.64	3067.48	4394.14	-1.4325	-0.518537	0.00124522	0.00995548
ENSMUSG00000041841	Rpl37	1981.12	1919.35	3059.04	2531.61	1950.24	2795.32	-1.43326	-0.519301	0.00232089	0.0164974
ENSMUSG00000073700	Klhl21	523.566	518.281	742.266	751.137	520.924	746.702	-1.43342	-0.519458	0.00547791	0.032463
ENSMUSG00000028085	Gatb	534.659	509.169	781.854	714.623	521.914	748.239	-1.43351	-0.519556	0.0069102	0.0390579
ENSMUSG00000020196	Cabin1	917.35	1013.78	1283.9	1484.89	965.566	1384.39	-1.4339	-0.519949	0.00405734	0.0255699
ENSMUSG00000030218	Mgp	510.255	534.228	753.963	745.051	522.242	749.507	-1.43522	-0.521268	0.0055227	0.0326433
ENSMUSG00000037331	Larp1	2217.39	2556.1	3603.37	3249.71	2386.74	3426.54	-1.43568	-0.521731	0.00149494	0.0115567
ENSMUSG00000049288	Lix1l	722.122	830.389	1098.55	1132.79	776.256	1115.67	-1.43739	-0.523449	0.00386635	0.0246398
ENSMUSG00000017466	Timp2	8364.86	7163.67	10037.2	12293.8	7764.27	11165.5	-1.43806	-0.524127	0.00264793	0.0183239
ENSMUSG00000034201	Gas2l1	679.971	811.025	1067.06	1081.5	745.498	1074.28	-1.44118	-0.527251	0.00496212	0.0299764
ENSMUSG00000022037	Clu	2302.8	2345.37	3086.93	3613.98	2324.08	3350.45	-1.44167	-0.527741	0.00109168	0.00892553
ENSMUSG00000053110	Yap1	1633.93	1630.02	2206.11	2501.18	1631.97	2353.64	-1.44225	-0.528323	0.00103109	0.00853546
ENSMUSG00000026641	Usf1	474.759	481.831	666.69	712.884	478.295	689.787	-1.44226	-0.52833	0.00632294	0.0363505
ENSMUSG00000034994	Eef2	26576.5	25977.9	36864.1	39029.6	26277.2	37946.8	-1.4441	-0.530169	7.47411e-05	0.000939821
ENSMUSG00000040209	Zfp704	1029.38	842.919	1256.9	1449.24	936.152	1353.07	-1.4453	-0.531366	0.00635147	0.0364513
ENSMUSG00000052534	Pbx1	1337.76	1174.39	1763.45	1868.28	1256.07	1815.86	-1.44561	-0.531679	0.00158136	0.0121363
ENSMUSG00000003435	Supt5	1023.84	1262.1	1542.11	1763.08	1142.97	1652.6	-1.44605	-0.532113	0.00528296	0.031543
ENSMUSG00000058569	Tmed9	999.435	1078.71	1624.89	1382.3	1039.07	1503.59	-1.44703	-0.533094	0.0029823	0.0201456
ENSMUSG00000063511	Snrnp70	2167.48	2283.85	3315.46	3132.34	2225.67	3223.9	-1.44852	-0.534576	0.000340369	0.00343481
ENSMUSG00000035342	Lzts2	1381.02	1676.73	2323.07	2113.44	1528.87	2218.26	-1.45097	-0.537016	0.00261092	0.0181214
ENSMUSG00000038244	Mical2	515.802	493.222	735.968	729.402	504.512	732.685	-1.4522	-0.538245	0.00443148	0.0274159
ENSMUSG00000073421	H2-Ab1	3974.45	3253.21	5078	5419.66	3613.83	5248.83	-1.4524	-0.538435	0.00132155	0.0104035
ENSMUSG00000006476	Nsmf	626.727	686.865	937.505	972.826	656.796	955.166	-1.4544	-0.540426	0.00290547	0.0197433
ENSMUSG00000040842	Szrd1	993.889	1135.66	1668.97	1430.12	1064.78	1549.55	-1.45529	-0.541309	0.00316344	0.0211437
ENSMUSG00000073702	Rpl31	2894.04	2990.08	4775.7	3788.72	2942.06	4282.21	-1.45548	-0.541496	0.00196964	0.0144465
ENSMUSG00000027293	Ehd4	1433.15	1330.45	2199.81	1823.07	1381.8	2011.44	-1.45556	-0.541576	0.00233249	0.0165247
ENSMUSG00000025812	Pard3	571.264	603.712	811.545	899.799	587.488	855.672	-1.45663	-0.542635	0.00397536	0.0251031
ENSMUSG00000039656	Rxrb	567.936	634.467	864.628	887.628	601.202	876.128	-1.45743	-0.543428	0.00357997	0.0232245
ENSMUSG00000021277	Traf3	475.869	468.162	705.378	672.024	472.015	688.701	-1.459	-0.54498	0.0046929	0.0287212
ENSMUSG00000056493	Foxk1	853.014	871.396	1271.3	1244.94	862.205	1258.12	-1.45919	-0.545172	0.00107737	0.00883463
ENSMUSG00000020547	Bzw2	570.155	652.693	985.19	805.038	611.424	895.114	-1.46397	-0.54989	0.00799898	0.0438551
ENSMUSG00000052609	Plekhg3	1034.93	1192.62	1543.91	1717.01	1113.77	1630.46	-1.46405	-0.549962	0.00188623	0.0139635
ENSMUSG00000029634	Rnf6	675.534	847.475	1065.26	1166.7	761.505	1115.98	-1.46571	-0.551599	0.00567093	0.0333582
ENSMUSG00000006519	Cyba	440.373	405.512	653.194	586.826	422.942	620.01	-1.46575	-0.551635	0.00736783	0.041147
ENSMUSG00000029231	Pdgfra	2351.61	2025.28	3283.97	3134.95	2188.45	3209.46	-1.46647	-0.552352	0.000617376	0.00561681
ENSMUSG00000042292	Mrtfa	479.196	460.188	702.679	677.24	469.692	689.96	-1.46888	-0.554712	0.00403957	0.0254779
ENSMUSG00000016559	H3f3b	4059.86	4047.15	5980.42	5954.32	4053.5	5967.37	-1.47215	-0.557924	5.14552e-05	0.000682093
ENSMUSG00000069682	Gm10275	697.719	854.31	1256.9	1028.47	776.014	1142.69	-1.47255	-0.558312	0.00729168	0.0407544
ENSMUSG00000031672	Got2	610.088	764.323	1080.56	945.007	687.205	1012.78	-1.47387	-0.559609	0.00669011	0.0380711
ENSMUSG00000035673	Sbno2	1429.82	1451.19	2090.94	2159.52	1440.51	2125.23	-1.47536	-0.561068	0.000249992	0.00265069
ENSMUSG00000060166	Zdhhc8	498.054	536.507	771.057	755.484	517.28	763.271	-1.47562	-0.561319	0.00304004	0.0204479
ENSMUSG00000022505	Emp2	738.761	578.653	975.293	969.349	658.707	972.321	-1.4759	-0.561597	0.00578335	0.033894
ENSMUSG00000024610	Cd74	10404.8	8821.03	13705.4	14696.7	9612.9	14201.1	-1.47728	-0.562943	0.000314428	0.00322933
ENSMUSG00000033542	Arhgef5	631.164	639.024	914.112	964.133	635.094	939.123	-1.47877	-0.564399	0.00161538	0.0123203
ENSMUSG00000042613	Pbxip1	1371.03	1279.19	2031.56	1894.36	1325.11	1962.96	-1.48128	-0.566842	0.000418395	0.00404746
ENSMUSG00000054008	Ndst1	2042.13	1742.79	2700.05	2907.18	1892.46	2803.61	-1.48142	-0.566979	0.000671708	0.00600795
ENSMUSG00000029438	Bcl7a	388.238	407.791	550.627	628.555	398.014	589.591	-1.48152	-0.567076	0.00688153	0.0389235
ENSMUSG00000017404	Rpl19	3630.58	4374.07	6244.04	5627.44	4002.32	5935.74	-1.4831	-0.568613	0.000691864	0.0061605
ENSMUSG00000090084	Srpx	776.476	752.932	1224.51	1044.11	764.704	1134.31	-1.48321	-0.568728	0.00211655	0.0153609
ENSMUSG00000025083	Afap1l2	316.136	349.697	502.042	485.979	332.917	494.01	-1.48399	-0.569486	0.00836777	0.045547
ENSMUSG00000038366	Lasp1	3856.87	3846.67	6038	5405.75	3851.77	5721.88	-1.4855	-0.570946	0.000113076	0.00134323
ENSMUSG00000026510	Trp53bp2	796.442	784.826	1023.88	1328.4	790.634	1176.14	-1.48771	-0.57309	0.00477266	0.029075
ENSMUSG00000026483	Niban1	1133.65	1054.79	1588	1668.32	1094.22	1628.16	-1.48794	-0.573312	0.000462342	0.00440291
ENSMUSG00000032280	Tle3	1717.12	1394.23	2369.85	2262.1	1555.68	2315.98	-1.48862	-0.573971	0.00119985	0.00966567
ENSMUSG00000031328	Flna	7053.73	6819.67	10481.7	10170.8	6936.7	10326.2	-1.48863	-0.573984	2.42562e-05	0.000365083
ENSMUSG00000024059	Clip4	482.524	404.373	643.298	677.24	443.449	660.269	-1.48878	-0.57413	0.0060008	0.0348471
ENSMUSG00000028796	Phc2	1188.01	1001.25	1551.11	1710.92	1094.63	1631.02	-1.48995	-0.575267	0.0014592	0.0113189
ENSMUSG00000041075	Fzd7	1262.33	1279.19	1586.2	2205.59	1270.76	1895.9	-1.49204	-0.57729	0.0054906	0.0325019
ENSMUSG00000027422	Rrbp1	2900.69	3615.44	4812.59	4914.56	3258.07	4863.57	-1.49284	-0.578056	0.000704369	0.00624386
ENSMUSG00000041560	Nop53	1384.34	1558.26	2141.33	2259.5	1471.3	2200.41	-1.49564	-0.580767	0.000359516	0.00358929
ENSMUSG00000022203	Efs	480.306	576.374	772.857	808.515	528.34	790.686	-1.49677	-0.581857	0.00387463	0.024663
ENSMUSG00000061787	Rps17	2641.13	2918.32	4524.68	3804.37	2779.72	4164.52	-1.49817	-0.583204	0.000509478	0.00477737
ENSMUSG00000025195	Dnmbp	501.381	478.414	685.584	782.434	489.897	734.009	-1.49835	-0.583373	0.00335019	0.0220488
ENSMUSG00000037321	Tap1	971.704	916.959	1163.33	1666.58	944.331	1414.96	-1.49847	-0.583486	0.00853006	0.0461774
ENSMUSG00000030315	Vgll4	892.947	760.905	1152.54	1325.79	826.926	1239.16	-1.49847	-0.583493	0.00224408	0.0160954
ENSMUSG00000040462	Os9	1550.73	1929.6	2568.69	2649.84	1740.17	2609.27	-1.49954	-0.584517	0.000961474	0.00804722
ENSMUSG00000014846	Tppp3	979.468	986.443	1686.07	1264.94	982.956	1475.5	-1.50098	-0.585904	0.00394106	0.0249658
ENSMUSG00000005442	Cic	1555.17	1788.36	2397.75	2621.15	1671.76	2509.45	-1.50118	-0.586097	0.00044113	0.00422764
ENSMUSG00000028108	Ecm1	1270.09	1019.48	1735.55	1702.23	1144.78	1718.89	-1.50136	-0.58627	0.00144333	0.0112068
ENSMUSG00000068856	Sf3b4	359.397	468.162	608.209	634.641	413.78	621.425	-1.50214	-0.58702	0.00941195	0.0499145
ENSMUSG00000039148	Sart1	431.499	553.593	771.957	707.668	492.546	739.813	-1.5022	-0.587077	0.00704705	0.039634
ENSMUSG00000039262	Prrc2b	3284.49	3189.42	4646.14	5082.34	3236.96	4864.24	-1.50273	-0.587587	6.33014e-05	0.000816649
ENSMUSG00000029614	Rpl6	4612.26	5603.13	7868.92	7481.81	5107.7	7675.37	-1.50273	-0.587588	0.000321747	0.00328232
ENSMUSG00000004099	Dnmt1	643.365	741.541	1031.08	1051.07	692.453	1041.07	-1.50361	-0.588427	0.00140224	0.0109466
ENSMUSG00000051413	Plagl2	320.573	329.194	520.036	457.289	324.884	488.663	-1.50402	-0.588824	0.00751735	0.0418057
ENSMUSG00000023942	Slc29a1	754.291	730.15	1093.16	1139.75	742.22	1116.45	-1.5042	-0.588998	0.000639039	0.00578411
ENSMUSG00000021025	Nfkbia	901.821	1144.78	1559.21	1519.66	1023.3	1539.44	-1.50452	-0.589305	0.00196619	0.0144357
ENSMUSG00000037966	Ninj1	447.028	583.209	755.762	795.475	515.118	775.618	-1.50599	-0.590714	0.00652436	0.0372345
ENSMUSG00000046668	Cxxc5	572.373	660.666	980.691	877.196	616.52	928.944	-1.50682	-0.591504	0.0023835	0.0168072
ENSMUSG00000020918	Kat2a	444.81	473.857	675.687	708.538	459.333	692.112	-1.5069	-0.591586	0.00241433	0.0169869
ENSMUSG00000042625	Safb2	869.653	1033.15	1477.34	1390.12	951.399	1433.73	-1.50707	-0.591742	0.00108363	0.00887792
ENSMUSG00000031834	Pik3r2	744.307	1091.24	1385.56	1380.56	917.773	1383.06	-1.50716	-0.591837	0.00842575	0.0457217
ENSMUSG00000057342	Sphk2	407.095	330.333	532.632	579.001	368.714	555.817	-1.50727	-0.591934	0.00839666	0.0456106
ENSMUSG00000026566	Mpzl1	437.045	498.917	714.375	696.366	467.981	705.371	-1.5074	-0.592066	0.00297413	0.0201067
ENSMUSG00000024053	Emilin2	849.686	830.389	1209.22	1324.05	840.038	1266.64	-1.50787	-0.592512	0.000571378	0.00524638
ENSMUSG00000058672	Tubb2a	360.507	411.208	630.702	533.794	385.857	582.248	-1.50899	-0.593581	0.0072655	0.0407042
ENSMUSG00000062997	Rpl35	1515.24	2073.13	3045.54	2369.91	1794.18	2707.72	-1.50921	-0.593792	0.00677694	0.0384688
ENSMUSG00000055653	Gpc3	698.828	558.149	1005.88	891.975	628.489	948.929	-1.5096	-0.594164	0.00413071	0.025973
ENSMUSG00000028799	Zfp362	328.338	419.181	553.326	575.524	373.76	564.425	-1.51045	-0.594976	0.008857	0.0475264
ENSMUSG00000039953	Clstn1	1900.15	2231.46	2959.17	3281.88	2065.8	3120.52	-1.51065	-0.595173	0.000420294	0.00406336
ENSMUSG00000070348	Ccnd1	967.267	1255.27	1751.75	1605.73	1111.27	1678.74	-1.51076	-0.595276	0.00241988	0.0170184
ENSMUSG00000062867	Impdh2	532.44	470.44	799.848	716.362	501.44	758.105	-1.51163	-0.596103	0.00297118	0.0200953
ENSMUSG00000070003	Ssbp4	476.978	586.626	906.015	703.321	531.802	804.668	-1.51312	-0.597529	0.00902727	0.0482774
ENSMUSG00000037405	Icam1	336.103	325.777	463.354	538.141	330.94	500.748	-1.51321	-0.597616	0.0069867	0.0393782
ENSMUSG00000030605	Mfge8	5899	6575.91	8416.85	10461.1	6237.45	9439	-1.51331	-0.597708	0.000520267	0.00485848
ENSMUSG00000021701	Plk2	1601.76	1492.19	1953.29	2728.96	1546.98	2341.12	-1.51341	-0.5978	0.0039507	0.0250169
ENSMUSG00000024812	Tjp2	668.878	713.064	1048.17	1043.25	690.971	1045.71	-1.51345	-0.597845	0.000664016	0.00595752
ENSMUSG00000020536	Llgl1	573.483	787.104	988.789	1071.07	680.293	1029.93	-1.51421	-0.598562	0.00636751	0.0365098
ENSMUSG00000024339	Tap2	915.132	996.695	1520.52	1375.35	955.913	1447.93	-1.51472	-0.599055	0.000531676	0.00494468
ENSMUSG00000062006	Rpl34	2408.18	2349.92	3896.67	3312.3	2379.05	3604.49	-1.51504	-0.59936	0.000217756	0.00235604
ENSMUSG00000050721	Plekho2	476.978	500.056	713.476	766.785	488.517	740.13	-1.51518	-0.59949	0.0018444	0.013705
ENSMUSG00000022443	Myh9	6925.05	7877.88	11110.6	11322.7	7401.46	11216.6	-1.51548	-0.599779	4.62944e-05	0.000623563
ENSMUSG00000031875	Cmtm3	643.365	723.316	1033.77	1038.03	683.341	1035.9	-1.51606	-0.600328	0.000917342	0.00775132
ENSMUSG00000005580	Adcy9	272.876	305.273	448.059	428.6	289.075	438.33	-1.51644	-0.600691	0.00784068	0.0431958
ENSMUSG00000013275	Slc41a1	683.298	685.726	971.694	1104.97	684.512	1038.33	-1.51699	-0.60121	0.00103775	0.00857275
ENSMUSG00000007892	Rplp1	6806.36	7701.32	11969.8	10054.3	7253.84	11012.1	-1.5181	-0.602268	0.000258728	0.0027342
ENSMUSG00000038668	Lpar1	370.49	373.618	588.415	541.618	372.054	565.017	-1.51857	-0.602712	0.00358897	0.0232734
ENSMUSG00000028634	Hivep3	299.498	309.83	448.959	476.415	304.664	462.687	-1.5188	-0.602933	0.00579772	0.0339407
ENSMUSG00000061288	Taok3	340.54	321.22	497.543	508.582	330.88	503.063	-1.52031	-0.604368	0.00445193	0.0275005
ENSMUSG00000000532	Acvr1b	627.836	551.315	915.012	878.065	589.575	896.539	-1.52048	-0.604525	0.00139348	0.0108835
ENSMUSG00000007039	Ddah2	400.44	480.692	676.587	663.33	440.566	669.959	-1.52088	-0.604906	0.00372046	0.0239405
ENSMUSG00000030717	Nupr1	571.264	801.912	1033.77	1054.55	686.588	1044.16	-1.52104	-0.605056	0.00637295	0.0365278
ENSMUSG00000032402	Smad3	790.896	688.004	1107.55	1142.35	739.45	1124.95	-1.52123	-0.605235	0.000865887	0.00743914
ENSMUSG00000010025	Aldh3a2	997.216	1029.73	1453.04	1630.94	1013.47	1541.99	-1.52158	-0.605573	0.000362213	0.00360715
ENSMUSG00000044447	Dock5	494.726	505.751	795.35	728.533	500.239	761.941	-1.52311	-0.607016	0.00154652	0.0119206
ENSMUSG00000029552	Tes	430.389	388.426	628.902	618.992	409.408	623.947	-1.52387	-0.607739	0.00270743	0.0186526
ENSMUSG00000024663	Rab3il1	440.373	490.943	701.779	720.709	465.658	711.244	-1.52756	-0.611228	0.00188712	0.0139636
ENSMUSG00000030036	Mogs	382.692	480.692	672.089	647.682	431.692	659.885	-1.52883	-0.612429	0.00476575	0.029044
ENSMUSG00000019997	Ccn2	628.945	684.587	993.288	1015.43	656.766	1004.36	-1.52936	-0.612924	0.000629998	0.00571203
ENSMUSG00000026355	Mcm6	374.927	415.764	618.106	591.172	395.345	604.639	-1.52949	-0.613053	0.00283474	0.0193454
ENSMUSG00000033684	Qsox1	1471.98	1706.34	2371.65	2490.75	1589.16	2431.2	-1.52996	-0.613498	0.000208682	0.00227973
ENSMUSG00000026042	Col5a2	4391.52	3369.4	6526.55	5348.37	3880.46	5937.46	-1.53003	-0.613558	0.00170572	0.0128999
ENSMUSG00000021843	Ktn1	1942.3	1742.79	2772.03	2877.62	1842.55	2824.82	-1.53307	-0.61642	8.06475e-05	0.00100455
ENSMUSG00000000753	Serpinf1	2694.37	2437.63	4074.82	3804.37	2566	3939.59	-1.53525	-0.618471	5.37251e-05	0.000707462
ENSMUSG00000001761	Smo	1132.55	980.748	1574.5	1671.8	1056.65	1623.15	-1.53606	-0.619235	0.000361458	0.00360189
ENSMUSG00000029599	Ddx54	503.6	592.321	851.132	832.858	547.961	841.995	-1.53676	-0.619892	0.00152632	0.0117707
ENSMUSG00000063146	Clip2	535.768	454.493	804.347	718.101	495.13	761.224	-1.53715	-0.62026	0.00260406	0.0180816
ENSMUSG00000030681	Mvp	972.813	1166.42	1589.8	1698.75	1069.62	1644.28	-1.53741	-0.620504	0.000564376	0.0051971
ENSMUSG00000056515	Rab31	493.617	529.672	814.244	758.961	511.644	786.602	-1.53743	-0.620518	0.00116557	0.0094348
ENSMUSG00000006269	Atp6v1b1	1047.13	1032.01	1438.65	1758.74	1039.57	1598.69	-1.53792	-0.620984	0.00070301	0.00623877
ENSMUSG00000054693	Adam10	2618.94	2011.61	3501.7	3623.54	2315.28	3562.62	-1.53867	-0.621685	0.000706315	0.00625762
ENSMUSG00000027540	Ptpn1	980.578	1123.13	1502.53	1740.48	1051.86	1621.5	-1.54173	-0.624546	0.000606368	0.00551983
ENSMUSG00000025223	Ldb1	1270.09	1614.08	2050.45	2396.86	1442.08	2223.66	-1.54212	-0.624918	0.00130182	0.0103148
ENSMUSG00000033066	Gas7	518.02	375.896	645.097	734.619	446.958	689.858	-1.54324	-0.625962	0.00854974	0.0461895
ENSMUSG00000026972	Arrdc1	423.734	413.486	640.598	652.028	418.61	646.313	-1.54393	-0.626612	0.00143843	0.0111797
ENSMUSG00000064080	Fbln2	1923.44	1862.4	3003.26	2855.88	1892.92	2929.57	-1.54761	-0.630042	2.45973e-05	0.000368473
ENSMUSG00000024393	Prrc2a	3952.26	5015.37	6687.6	7191.44	4483.81	6939.52	-1.54773	-0.630155	0.000312577	0.00321352
ENSMUSG00000032737	Inppl1	1369.92	1600.41	2443.63	2155.17	1485.17	2299.4	-1.54828	-0.630669	0.000317555	0.00324998
ENSMUSG00000022091	Sorbs3	655.567	710.786	1056.27	1061.5	683.176	1058.88	-1.55004	-0.632302	0.000350321	0.00351515
ENSMUSG00000067825	Pex26	259.565	316.664	436.363	457.289	288.114	446.826	-1.5512	-0.633386	0.0070154	0.039498
ENSMUSG00000025007	Aldh18a1	311.699	316.664	529.933	445.118	314.182	487.526	-1.55158	-0.633736	0.0052469	0.0313748
ENSMUSG00000022661	Cd200	1115.91	1354.37	2082.84	1750.91	1235.14	1916.88	-1.552	-0.634127	0.000914771	0.00773782
ENSMUSG00000045411	2410002F23Rik	373.818	407.791	603.71	609.429	390.804	606.57	-1.55224	-0.634353	0.00180688	0.0135146
ENSMUSG00000021127	Zfp36l1	2898.47	2570.9	3874.18	4616.36	2734.69	4245.27	-1.55238	-0.63448	0.000196304	0.0021607
ENSMUSG00000048332	Lhfp	476.978	339.446	597.412	670.285	408.212	633.849	-1.5525	-0.634589	0.00939979	0.0498666
ENSMUSG00000056427	Slit3	1694.94	2106.16	2631.67	3270.57	1900.55	2951.12	-1.55289	-0.63496	0.00118333	0.00954714
ENSMUSG00000037326	Capn15	319.464	374.757	538.031	539.88	347.111	538.955	-1.55292	-0.634983	0.00348502	0.0227198
ENSMUSG00000024182	Axin1	557.953	640.163	889.82	971.088	599.058	930.454	-1.55341	-0.635434	0.000936661	0.00788101
ENSMUSG00000040479	Dgkz	1300.04	1230.21	1805.73	2124.74	1265.12	1965.24	-1.55343	-0.635457	0.000240967	0.00256937
ENSMUSG00000032245	Cln6	309.481	301.856	480.449	469.46	305.669	474.955	-1.55376	-0.635759	0.00323349	0.0214854
ENSMUSG00000095115	Itpripl2	1384.34	1353.23	2190.81	2067.36	1368.79	2129.09	-1.55541	-0.637298	4.18926e-05	0.000573012
ENSMUSG00000032011	Thy1	973.922	929.489	1682.47	1278.85	951.706	1480.66	-1.55565	-0.63752	0.00155567	0.011968
ENSMUSG00000001119	Col6a1	5583.97	5203.32	10021	6762.84	5393.64	8391.94	-1.55586	-0.637715	0.00249938	0.0174616
ENSMUSG00000038437	Mllt6	1387.67	1394.23	2130.53	2203.86	1390.95	2167.19	-1.55808	-0.639772	2.991e-05	0.000434542
ENSMUSG00000052934	Fbxo31	683.298	805.329	1248.81	1071.93	744.314	1160.37	-1.55903	-0.64065	0.00105955	0.00872109
ENSMUSG00000038781	Stap2	265.111	289.326	430.065	435.555	277.219	432.81	-1.56142	-0.642857	0.00429708	0.026794
ENSMUSG00000024300	Myo1f	224.069	214.147	328.397	356.442	219.108	342.419	-1.56281	-0.644145	0.00832913	0.0453989
ENSMUSG00000028843	Sh3bgrl3	415.969	493.222	724.272	697.236	454.595	710.754	-1.56366	-0.644931	0.00165351	0.0125806
ENSMUSG00000051768	Xrcc1	280.64	320.081	476.85	462.505	300.361	469.678	-1.56388	-0.645132	0.00388919	0.0247358
ENSMUSG00000040618	Pck2	524.676	576.374	878.124	845.029	550.525	861.576	-1.56509	-0.646246	0.00056242	0.00518212
ENSMUSG00000060519	Tor3a	598.995	580.931	752.163	1097.15	589.963	924.655	-1.56747	-0.648436	0.00633798	0.0364062
ENSMUSG00000001128	Cfp	777.585	610.547	1019.38	1158	694.066	1088.69	-1.56845	-0.649336	0.00171868	0.012977
ENSMUSG00000022353	Mtss1	1342.19	1904.54	2580.39	2515.09	1623.37	2547.74	-1.56953	-0.650333	0.00170603	0.0128999
ENSMUSG00000039115	Itga9	305.044	297.3	458.856	486.848	301.172	472.852	-1.57007	-0.650825	0.00281937	0.0192653
ENSMUSG00000049401	Ogfr	699.937	734.706	922.21	1330.14	717.322	1126.17	-1.57016	-0.650907	0.00454961	0.0279735
ENSMUSG00000020697	Lig3	377.145	373.618	550.627	628.555	375.382	589.591	-1.57076	-0.651464	0.00196249	0.0144357
ENSMUSG00000078153	Psme2b	455.902	387.287	720.673	604.213	421.595	662.443	-1.57095	-0.651639	0.00308921	0.0207085
ENSMUSG00000049866	Arl4c	525.785	493.222	717.974	883.281	509.503	800.628	-1.57147	-0.652116	0.00175202	0.0132037
ENSMUSG00000025784	Clec3b	2362.7	2568.62	3938.06	3813.06	2465.66	3875.56	-1.57184	-0.652454	1.14915e-05	0.000192288
ENSMUSG00000032184	Lysmd2	283.968	282.492	389.577	500.758	283.23	445.168	-1.57199	-0.652588	0.00782522	0.0431405
ENSMUSG00000010095	Slc3a2	1547.4	1487.64	2348.26	2422.94	1517.52	2385.6	-1.57202	-0.652623	1.83252e-05	0.000287523
ENSMUSG00000021559	Dapk1	3148.05	1918.21	3736.52	4228.62	2533.13	3982.57	-1.57213	-0.652718	0.00699975	0.0394378
ENSMUSG00000037805	Rpl10a	3751.49	4178.14	6485.16	5993.45	3964.82	6239.3	-1.57368	-0.654145	1.50685e-05	0.000241918
ENSMUSG00000044017	Adgrd1	651.13	668.64	986.989	1090.19	659.885	1038.59	-1.574	-0.654436	0.000290389	0.00300289
ENSMUSG00000058070	Eml1	295.061	305.273	535.332	411.213	300.167	473.272	-1.5765	-0.656727	0.00718109	0.0403166
ENSMUSG00000047881	Rell1	323.901	395.261	541.63	592.911	359.581	567.27	-1.57793	-0.658035	0.00324919	0.0215537
ENSMUSG00000021943	Gdf10	508.037	680.031	915.012	959.786	594.034	937.399	-1.5783	-0.658373	0.00230536	0.0164226
ENSMUSG00000026380	Tfcp2l1	351.633	282.492	448.059	552.92	317.062	500.49	-1.57843	-0.658491	0.00756932	0.0420506
ENSMUSG00000039208	Metrnl	288.405	320.081	439.962	520.753	304.243	480.357	-1.57918	-0.659176	0.00438405	0.0271764
ENSMUSG00000039043	Arpin	242.926	258.571	384.179	407.735	250.749	395.957	-1.57928	-0.659269	0.00452426	0.0278448
ENSMUSG00000038884	Shfl	311.699	251.737	402.173	487.717	281.718	444.945	-1.57929	-0.659278	0.00848026	0.0459547
ENSMUSG00000032185	Carm1	592.34	612.825	998.686	905.885	602.582	952.285	-1.5803	-0.660201	0.000334329	0.0033906
ENSMUSG00000028456	Unc13b	509.146	415.764	780.954	681.587	462.455	731.271	-1.58095	-0.660795	0.00222375	0.015964
ENSMUSG00000029135	Fosl2	828.61	934.045	1636.59	1151.05	881.328	1393.82	-1.58144	-0.661235	0.00322001	0.0214048
ENSMUSG00000044674	Fzd1	982.796	895.317	1304.59	1665.72	939.056	1485.15	-1.58158	-0.661368	0.000824003	0.00714885
ENSMUSG00000001911	Nfix	3073.73	3511.78	4983.53	5432.7	3292.76	5208.12	-1.58174	-0.661517	2.59601e-05	0.000385978
ENSMUSG00000026600	Soat1	332.775	349.697	580.317	499.888	341.236	540.103	-1.58271	-0.662393	0.00245874	0.0172231
ENSMUSG00000031078	Cttn	1773.69	1854.42	2798.12	2948.04	1814.06	2873.08	-1.58383	-0.66342	1.06351e-05	0.000180786
ENSMUSG00000020607	Lratd1	622.29	523.977	741.367	1075.41	573.133	908.389	-1.585	-0.664487	0.00670052	0.0381167
ENSMUSG00000002985	Apoe	21197.8	24936.7	39251.1	33899.4	23067.3	36575.2	-1.58559	-0.665023	4.74601e-05	0.000636566
ENSMUSG00000001123	Lgals9	1306.7	1071.87	1445.85	2325.57	1189.29	1885.71	-1.58561	-0.665041	0.00858696	0.0463276
ENSMUSG00000040824	Snrpd2	384.91	511.447	793.55	627.686	448.178	710.618	-1.58568	-0.665106	0.00623984	0.0359463
ENSMUSG00000008958	Vps72	353.851	388.426	566.822	610.299	371.139	588.56	-1.58604	-0.665425	0.00142636	0.0110987
ENSMUSG00000037692	Ahdc1	648.912	703.951	1004.98	1141.48	676.432	1073.23	-1.58678	-0.666105	0.000339329	0.00342817
ENSMUSG00000028645	Slc2a1	352.742	304.134	599.211	443.379	328.438	521.295	-1.58679	-0.666114	0.008245	0.045033
ENSMUSG00000002980	Bcam	1526.33	1870.37	2738.74	2651.58	1698.35	2695.16	-1.58702	-0.666317	0.000125166	0.00147035
ENSMUSG00000027639	Samhd1	1890.16	1770.13	2363.56	3445.32	1830.15	2904.44	-1.58705	-0.666346	0.00191258	0.0141191
ENSMUSG00000037306	Man1c1	535.768	513.725	823.241	842.421	524.747	832.831	-1.58708	-0.666371	0.000318947	0.00326003
ENSMUSG00000051439	Cd14	714.358	677.752	943.803	1265.8	696.055	1104.8	-1.58734	-0.666615	0.00182965	0.01364
ENSMUSG00000003363	Pld3	541.314	699.395	1004.08	966.741	620.355	985.412	-1.58867	-0.667824	0.00124957	0.0099836
ENSMUSG00000055980	Irs1	1444.24	1241.6	2225.9	2043.89	1342.92	2134.9	-1.58961	-0.668676	9.55875e-05	0.00115886
ENSMUSG00000002227	Mov10	332.775	370.201	496.644	620.731	351.488	558.687	-1.58982	-0.668864	0.00380127	0.0243417
ENSMUSG00000026942	Traf2	352.742	377.035	572.22	590.303	364.889	581.262	-1.59312	-0.671855	0.00107779	0.00883463
ENSMUSG00000040945	Rcc2	1259	1468.27	2230.4	2115.18	1363.64	2172.79	-1.59345	-0.672156	6.93602e-05	0.000882635
ENSMUSG00000013150	Gfod2	226.287	235.79	357.188	379.046	231.038	368.117	-1.59346	-0.672167	0.00465326	0.0285445
ENSMUSG00000025225	Nfkb2	453.684	577.513	788.152	856.331	515.599	822.241	-1.59504	-0.67359	0.00155968	0.011993
ENSMUSG00000026821	Ralgds	1128.11	1202.87	1735.55	1983.91	1165.49	1859.73	-1.59578	-0.674258	7.46239e-05	0.000939092
ENSMUSG00000030659	Nucb2	262.892	331.472	507.44	441.641	297.182	474.54	-1.59699	-0.675351	0.0054516	0.0323433
ENSMUSG00000032220	Myo1e	531.331	479.553	807.946	806.776	505.442	807.361	-1.5972	-0.675547	0.000395453	0.00387744
ENSMUSG00000028334	Nans	244.035	307.552	472.351	408.604	275.793	440.478	-1.59732	-0.67565	0.00647668	0.0370156
ENSMUSG00000048200	Cracr2b	285.077	355.393	526.334	497.28	320.235	511.807	-1.59848	-0.676699	0.00337116	0.022141
ENSMUSG00000046658	Zfp316	334.994	299.578	487.647	527.708	317.286	507.677	-1.59997	-0.678048	0.00201862	0.0147309
ENSMUSG00000020453	Patz1	342.758	256.293	457.056	502.497	299.526	479.776	-1.60149	-0.679419	0.00620233	0.0357821
ENSMUSG00000058818	Pirb	244.035	190.226	333.795	362.528	217.131	348.161	-1.60316	-0.680917	0.00942234	0.0499362
ENSMUSG00000031548	Sfrp1	362.725	554.732	700.879	770.263	458.728	735.571	-1.60389	-0.681578	0.00763475	0.0423697
ENSMUSG00000040249	Lrp1	11077	11229	17549.9	18235.9	11153	17892.9	-1.60432	-0.681958	3.35598e-07	9.02537e-06
ENSMUSG00000054717	Hmgb2	209.648	231.233	361.686	346.01	220.441	353.848	-1.60531	-0.682849	0.00496108	0.0299764
ENSMUSG00000039062	Anpep	1511.91	1317.92	2094.54	2449.89	1414.91	2272.21	-1.60589	-0.683369	0.000118868	0.00140258
ENSMUSG00000007029	Vars	1316.68	1511.56	2088.24	2454.23	1414.12	2271.24	-1.60625	-0.683694	0.000127498	0.00149224
ENSMUSG00000036565	Ttyh3	938.426	1101.49	1733.75	1545.74	1019.96	1639.75	-1.60772	-0.68502	0.000160071	0.00182117
ENSMUSG00000055013	Agap1	734.324	645.858	1103.95	1117.14	690.091	1110.55	-1.60915	-0.686296	0.000150072	0.00172844
ENSMUSG00000022594	Lynx1	341.649	395.261	687.384	499.019	368.455	593.201	-1.6099	-0.686971	0.00586721	0.0342413
ENSMUSG00000052512	Nav2	364.944	379.314	592.913	605.952	372.129	599.433	-1.61091	-0.687872	0.000681297	0.00608003
ENSMUSG00000066113	Adamtsl1	336.103	279.075	503.841	487.717	307.589	495.779	-1.61151	-0.688414	0.0024418	0.0171331
ENSMUSG00000020393	Kremen1	696.61	672.057	1075.16	1132.79	684.333	1103.98	-1.61321	-0.689937	7.92207e-05	0.000989107
ENSMUSG00000046364	Rpl27a	3451.99	4015.26	6358.3	5694.38	3733.62	6026.34	-1.61409	-0.690725	2.01791e-05	0.000311384
ENSMUSG00000024338	Psmb8	637.819	600.295	980.691	1018.9	619.057	999.797	-1.61499	-0.691525	0.000113299	0.00134487
ENSMUSG00000036103	Colec12	555.735	426.016	804.347	783.303	490.875	793.825	-1.61686	-0.693198	0.0013681	0.0107116
ENSMUSG00000020736	Nt5c	238.489	269.962	435.463	386.87	254.225	411.167	-1.6174	-0.693679	0.00361823	0.0234154
ENSMUSG00000064043	Trerf1	197.447	179.975	318.5	292.109	188.711	305.304	-1.61755	-0.693813	0.00713036	0.0400742
ENSMUSG00000026223	Itm2c	1761.49	1844.17	2962.77	2874.14	1802.83	2918.45	-1.61883	-0.694956	3.24198e-06	6.56409e-05
ENSMUSG00000021703	Serinc5	773.148	714.203	1153.44	1255.37	743.675	1204.4	-1.61951	-0.695553	8.63711e-05	0.00106748
ENSMUSG00000040613	Apobec1	336.103	374.757	598.312	552.92	355.43	575.616	-1.61958	-0.695615	0.00103876	0.00857668
ENSMUSG00000002393	Nr2f6	377.145	529.672	785.453	685.065	453.409	735.259	-1.62186	-0.697646	0.00373769	0.0240124
ENSMUSG00000019889	Ptprk	644.475	603.712	902.416	1123.23	624.093	1012.82	-1.62294	-0.698613	0.000552257	0.00510621
ENSMUSG00000044786	Zfp36	525.785	631.05	1075.16	802.43	578.418	938.796	-1.62304	-0.698695	0.00229437	0.0163759
ENSMUSG00000006344	Ggt5	537.987	498.917	907.814	775.479	518.452	841.647	-1.62317	-0.698816	0.000459326	0.00437682
ENSMUSG00000042116	Vwa1	396.003	396.4	747.665	539.01	396.201	643.337	-1.62354	-0.699141	0.00373278	0.0239906
ENSMUSG00000049517	Rps23	3156.93	3564.18	6307.92	4608.54	3360.55	5458.23	-1.62419	-0.69972	0.000404862	0.00394144
ENSMUSG00000020806	Rhbdf2	331.666	406.651	608.209	591.172	369.159	599.691	-1.62473	-0.700203	0.00137815	0.0107744
ENSMUSG00000046434	Hnrnpa1	1871.31	1852.14	3349.65	2706.35	1861.72	3028	-1.62638	-0.701668	6.01692e-05	0.000780676
ENSMUSG00000027381	Bcl2l11	457.011	355.393	590.214	732.011	406.202	661.112	-1.62743	-0.702595	0.00324429	0.0215301
ENSMUSG00000059552	Trp53	565.718	595.739	910.514	979.781	580.728	945.147	-1.62765	-0.702788	0.000126579	0.00148366
ENSMUSG00000030609	Aen	209.648	248.319	369.784	375.568	228.984	372.676	-1.62784	-0.702956	0.00410795	0.0258581
ENSMUSG00000019929	Dcn	19815.7	16943.8	29003.3	30871.4	18379.7	29937.3	-1.62882	-0.703823	3.90763e-06	7.69615e-05
ENSMUSG00000048387	Osr1	316.136	404.373	530.833	642.465	360.255	586.649	-1.62887	-0.703869	0.00337344	0.0221468
ENSMUSG00000030527	Crtc3	521.348	534.228	762.96	957.178	527.788	860.069	-1.62976	-0.704658	0.000723073	0.00639183
ENSMUSG00000035671	Zswim4	232.943	258.571	402.173	399.041	245.757	400.607	-1.63028	-0.705116	0.00252016	0.0175759
ENSMUSG00000034168	Irf2bpl	1163.6	1324.75	2095.44	1962.17	1244.18	2028.81	-1.6307	-0.705494	2.55355e-05	0.00038109
ENSMUSG00000000693	Loxl3	201.884	220.981	343.692	346.01	211.433	344.851	-1.6312	-0.705935	0.00389381	0.0247553
ENSMUSG00000001473	Tubb6	408.204	557.01	873.625	702.452	482.607	788.039	-1.63303	-0.707547	0.00344031	0.0224837
ENSMUSG00000084883	Ccdc85c	228.506	290.465	446.26	401.65	259.486	423.955	-1.63408	-0.708482	0.00443305	0.0274159
ENSMUSG00000061411	Nol4l	285.077	261.988	448.959	445.118	273.533	447.038	-1.63415	-0.708544	0.00156564	0.0120272
ENSMUSG00000074170	Plekhf1	206.321	162.888	295.107	308.627	184.605	301.867	-1.63484	-0.709152	0.00890058	0.0477441
ENSMUSG00000042410	Agps	4008.83	2807.83	5649.32	5497.9	3408.33	5573.61	-1.63522	-0.709488	0.000444907	0.00425729
ENSMUSG00000058600	Rpl30	1526.33	2360.17	3287.57	3068.01	1943.25	3177.79	-1.63539	-0.709637	0.00177029	0.0133224
ENSMUSG00000081895	Rpl17-ps10	1948.95	2028.7	3273.17	3232.32	1988.83	3252.75	-1.63553	-0.709757	1.3127e-06	3.00202e-05
ENSMUSG00000040659	Efhd2	823.064	887.343	1430.55	1369.26	855.204	1399.9	-1.63697	-0.711031	2.59951e-05	0.000386137
ENSMUSG00000000385	Tmprss2	1173.59	1075.29	1323.48	2359.47	1124.44	1841.48	-1.63777	-0.711731	0.00857314	0.0462845
ENSMUSG00000033902	Mapkbp1	574.592	454.493	834.937	851.114	514.542	843.026	-1.63815	-0.712072	0.000632799	0.00573227
ENSMUSG00000031072	LTO1	239.598	224.399	400.374	359.92	231.998	380.147	-1.63832	-0.712221	0.00300229	0.0202454
ENSMUSG00000063382	Bcl9l	1550.73	1962.63	2692.85	3066.27	1756.68	2879.56	-1.63933	-0.71311	0.000138216	0.00160351
ENSMUSG00000003970	Rpl8	4435.89	5223.82	8534.71	7321.84	4829.86	7928.28	-1.64153	-0.715039	2.25666e-05	0.00034276
ENSMUSG00000023495	Pcbp4	383.801	482.97	718.874	704.191	433.385	711.532	-1.64207	-0.715513	0.000863106	0.00741926
ENSMUSG00000024769	Cdc42bpg	496.944	578.653	817.843	948.484	537.798	883.163	-1.64246	-0.715858	0.000437991	0.00420123
ENSMUSG00000029869	Ephb6	235.161	332.611	442.661	490.325	283.886	466.493	-1.64376	-0.717003	0.00604687	0.0350762
ENSMUSG00000050730	Arhgap42	704.374	698.256	1057.17	1248.42	701.315	1152.79	-1.64386	-0.717087	0.000124299	0.00146125
ENSMUSG00000075592	Nynrin	291.733	411.208	553.326	602.474	351.47	577.9	-1.64469	-0.717815	0.00383458	0.0245061
ENSMUSG00000027597	Ahcy	319.464	299.578	579.418	439.032	309.521	509.225	-1.64487	-0.717978	0.00333545	0.0219883
ENSMUSG00000038256	Bcl9	286.187	404.373	529.933	605.952	345.28	567.943	-1.64536	-0.718402	0.00451764	0.0278308
ENSMUSG00000039157	Fam102a	672.206	772.296	1129.14	1249.29	722.251	1189.22	-1.64674	-0.719617	0.00010817	0.00129364
ENSMUSG00000036986	Pml	575.701	610.547	800.748	1152.79	593.124	976.767	-1.64704	-0.719877	0.00211937	0.0153744
ENSMUSG00000003644	Rps6ka1	454.793	452.215	723.372	771.132	453.504	747.252	-1.64779	-0.720529	0.000178767	0.00200234
ENSMUSG00000020303	Stc2	1592.88	1446.63	2644.27	2370.78	1519.76	2507.52	-1.64985	-0.722332	1.06755e-05	0.000181085
ENSMUSG00000037638	Zbtb42	210.758	161.749	296.007	319.059	186.253	307.533	-1.65078	-0.72315	0.00853668	0.0461829
ENSMUSG00000018474	Chd3	1251.23	1279.19	2272.68	1905.66	1265.21	2089.17	-1.65119	-0.723503	3.07792e-05	0.000444731
ENSMUSG00000002489	Tiam1	207.43	215.286	360.786	337.316	211.358	349.051	-1.65145	-0.723736	0.00296313	0.0200579
ENSMUSG00000038305	Spats2l	175.262	185.67	278.013	318.19	180.466	298.101	-1.65214	-0.724332	0.00592091	0.0344336
ENSMUSG00000045639	Zfp629	412.641	406.651	658.593	695.497	409.646	677.045	-1.65279	-0.724902	0.000233443	0.00250868
ENSMUSG00000030342	Cd9	1941.19	1632.3	3024.85	2889.79	1786.75	2957.32	-1.65504	-0.726867	1.40365e-05	0.000228347
ENSMUSG00000028445	Enho	250.691	210.73	377.881	386.001	230.71	381.941	-1.65522	-0.72702	0.00290891	0.0197582
ENSMUSG00000041515	Irf8	236.27	265.406	451.658	379.046	250.838	415.352	-1.65586	-0.727578	0.0028898	0.0196532
ENSMUSG00000048285	Frmd6	1163.6	1358.92	1990.17	2188.21	1261.26	2089.19	-1.65657	-0.728199	2.75941e-05	0.000404266
ENSMUSG00000030352	Tspan9	843.031	742.68	1350.48	1277.11	792.855	1313.79	-1.65687	-0.728464	4.05052e-05	0.00055836
ENSMUSG00000028967	Errfi1	847.468	691.421	1452.14	1098.02	769.445	1275.08	-1.65689	-0.728475	0.000955241	0.00800649
ENSMUSG00000019467	Arhgef25	347.195	452.215	661.292	663.33	399.705	662.311	-1.65733	-0.72886	0.00114777	0.00932647
ENSMUSG00000032812	Arap1	916.241	1006.95	1666.28	1522.27	961.594	1594.27	-1.65798	-0.729427	2.04194e-05	0.000313875
ENSMUSG00000095041	-	2279.51	1858.98	3687.94	3178.42	2069.24	3433.18	-1.65904	-0.730345	5.41132e-05	0.000710806
ENSMUSG00000041439	Mfsd6	451.465	441.963	667.59	817.209	446.714	742.399	-1.66205	-0.732965	0.000500132	0.00470639
ENSMUSG00000029070	Mxra8	942.863	1070.73	1485.43	1861.32	1006.8	1673.38	-1.66226	-0.733143	0.000167606	0.00188663
ENSMUSG00000030257	Srgap3	270.657	193.644	387.778	384.262	232.15	386.02	-1.6623	-0.733178	0.00616138	0.0356106
ENSMUSG00000057841	Rpl32	2501.36	3315.86	5417.2	4254.7	2908.61	4835.95	-1.66266	-0.733493	0.000392655	0.00385476
ENSMUSG00000060636	Rpl35a	1313.35	1280.33	2453.53	1859.59	1296.84	2156.56	-1.66283	-0.733641	0.000163263	0.00184559
ENSMUSG00000052957	Gas1	1231.27	1328.17	2018.96	2236.89	1279.72	2127.93	-1.66291	-0.733714	7.92962e-06	0.000141135
ENSMUSG00000040855	Reps2	270.657	224.399	433.664	390.348	247.528	412.006	-1.66405	-0.7347	0.00265158	0.0183316
ENSMUSG00000050910	Cdr2l	238.489	238.068	425.566	367.744	238.278	396.655	-1.66449	-0.735082	0.00217514	0.0156716
ENSMUSG00000033420	Antxr1	1509.69	1309.94	2153.02	2542.04	1409.82	2347.53	-1.66511	-0.73562	4.13583e-05	0.000567169
ENSMUSG00000071415	Rpl23	2343.85	2752.02	4678.53	3815.67	2547.93	4247.1	-1.66689	-0.73716	4.76672e-05	0.000638804
ENSMUSG00000027523	Gnas	618.962	1026.31	1467.44	1275.37	822.636	1371.4	-1.66727	-0.737489	0.00452292	0.0278448
ENSMUSG00000070319	Eif3g	482.524	607.13	1017.58	799.822	544.827	908.701	-1.66794	-0.738067	0.00116972	0.0094421
ENSMUSG00000022185	Acin1	1688.28	1811.14	2859.3	2977.6	1749.71	2918.45	-1.66802	-0.738139	1.20966e-06	2.80676e-05
ENSMUSG00000019558	Slc6a8	539.096	557.01	879.923	949.353	548.053	914.638	-1.669	-0.738981	6.26736e-05	0.000809865
ENSMUSG00000003575	Crtc1	368.271	341.724	576.719	609.429	354.998	593.074	-1.67058	-0.740349	0.00035111	0.00352085
ENSMUSG00000055435	Maf	1282.29	1274.63	2203.41	2074.32	1278.46	2138.86	-1.67296	-0.742404	1.96662e-06	4.29952e-05
ENSMUSG00000030403	Vasp	674.424	888.482	1420.65	1194.52	781.453	1307.58	-1.67339	-0.742774	0.000531995	0.00494475
ENSMUSG00000050628	Ubald2	291.733	336.029	602.81	447.726	313.881	525.268	-1.6734	-0.742784	0.00317546	0.0211795
ENSMUSG00000071076	Jund	646.693	858.866	1419.75	1099.75	752.78	1259.75	-1.67355	-0.742911	0.00116491	0.0094348
ENSMUSG00000042644	Itpr3	655.567	662.944	1008.58	1197.99	659.256	1103.29	-1.67367	-0.743011	8.92377e-05	0.00109525
ENSMUSG00000037206	Islr	806.425	874.813	1405.36	1411.86	840.619	1408.61	-1.67577	-0.744823	9.89914e-06	0.000170094
ENSMUSG00000032959	Pebp1	1051.57	1438.66	2299.68	1873.49	1245.11	2086.59	-1.6759	-0.744937	0.000585451	0.00535703
ENSMUSG00000007817	Zmiz1	2422.6	2158.56	3957.85	3722.65	2290.58	3840.25	-1.67647	-0.745426	1.59795e-06	3.59743e-05
ENSMUSG00000020937	Plcd3	241.817	239.207	455.257	352.095	240.512	403.676	-1.67812	-0.746845	0.00341161	0.0223477
ENSMUSG00000036046	5031439G07Rik	1040.48	1062.76	1915.5	1619.64	1051.62	1767.57	-1.68074	-0.749096	2.02503e-05	0.00031218
ENSMUSG00000003134	Tbc1d8	383.801	242.624	475.051	578.132	313.212	526.591	-1.68093	-0.749263	0.00864027	0.0465047
ENSMUSG00000026837	Col5a1	3627.25	3173.48	6797.36	4635.49	3400.36	5716.42	-1.68106	-0.749373	0.000479083	0.00453517
ENSMUSG00000029122	Evc	219.632	250.598	388.678	402.519	235.115	395.598	-1.68287	-0.750921	0.00161542	0.0123203
ENSMUSG00000020451	Limk2	587.903	592.321	1006.78	981.52	590.112	994.152	-1.68467	-0.752466	2.31244e-05	0.000350705
ENSMUSG00000034295	Fhod3	269.548	227.816	334.695	503.366	248.682	419.03	-1.68512	-0.752848	0.00918319	0.0489232
ENSMUSG00000000631	Myo18a	1310.03	1322.47	2286.18	2150.82	1316.25	2218.5	-1.68545	-0.753135	1.26699e-06	2.90962e-05
ENSMUSG00000032068	Plet1	397.112	309.83	510.14	681.587	353.471	595.863	-1.68568	-0.753331	0.0032022	0.021331
ENSMUSG00000046841	Ckap4	482.524	513.725	959.098	722.447	498.125	840.773	-1.68776	-0.755107	0.000688333	0.00613938
ENSMUSG00000027488	Snta1	458.121	445.38	786.353	738.966	451.75	762.659	-1.68813	-0.755424	8.36794e-05	0.00103906
ENSMUSG00000040605	Bace2	190.791	191.365	376.981	268.636	191.078	322.809	-1.68906	-0.75622	0.0083779	0.0455619
ENSMUSG00000024736	Tmem132a	242.926	248.319	402.173	427.731	245.623	414.952	-1.68951	-0.756605	0.00099375	0.00827813
ENSMUSG00000070420	Zscan25	146.421	128.716	228.528	236.469	137.569	232.499	-1.68982	-0.756873	0.00832892	0.0453989
ENSMUSG00000017754	Pltp	1700.48	1337.28	2104.44	3032.37	1518.88	2568.4	-1.69098	-0.757858	0.000970382	0.00811323
ENSMUSG00000022098	Bmp1	1364.38	1151.61	2196.21	2065.63	1257.99	2130.92	-1.69376	-0.760229	1.11198e-05	0.000187025
ENSMUSG00000020205	Phlda1	228.506	218.703	332.895	425.123	223.604	379.009	-1.69519	-0.761448	0.00320811	0.0213497
ENSMUSG00000006215	Zbtb17	231.833	238.068	403.073	394.695	234.951	398.884	-1.69776	-0.763633	0.000981726	0.00819084
ENSMUSG00000028063	Lmna	1953.39	2675.7	3930.86	3935.64	2314.54	3933.25	-1.69946	-0.765075	8.25957e-05	0.00102721
ENSMUSG00000021318	Gli3	184.136	157.193	298.706	281.676	170.664	290.191	-1.69996	-0.7655	0.00427275	0.0266631
ENSMUSG00000014303	Glis2	259.565	250.598	437.262	430.339	255.081	433.801	-1.70055	-0.766001	0.000678896	0.006062
ENSMUSG00000053332	Gas5	646.693	713.064	1103.95	1210.16	679.879	1157.06	-1.70204	-0.767264	2.39462e-05	0.000361101
ENSMUSG00000040606	Kazn	209.648	191.365	344.592	338.185	200.507	341.388	-1.70241	-0.767583	0.00190404	0.0140627
ENSMUSG00000051343	Rab11fip5	1022.73	870.257	1535.82	1687.45	946.493	1611.63	-1.70266	-0.767787	2.08324e-05	0.000318889
ENSMUSG00000022103	Gfra2	311.699	277.935	408.471	595.519	294.817	501.995	-1.70288	-0.767977	0.0042686	0.0266477
ENSMUSG00000063457	Rps15	3108.12	4002.73	6465.37	5644.83	3555.42	6055.1	-1.7031	-0.76816	3.24579e-05	0.000465181
ENSMUSG00000053931	Cnn3	1595.1	1586.74	3045.54	2376.86	1590.92	2711.2	-1.7041	-0.769007	3.01423e-05	0.000436719
ENSMUSG00000019841	Rev3l	1061.55	922.655	1784.14	1600.51	992.104	1692.33	-1.70562	-0.770299	1.4577e-05	0.000235215
ENSMUSG00000024909	Efemp2	383.801	453.354	757.562	671.155	418.577	714.358	-1.70676	-0.771256	0.000274001	0.00286135
ENSMUSG00000024621	Csf1r	1706.03	1350.95	2495.81	2722.87	1528.49	2609.34	-1.70705	-0.771505	2.74832e-05	0.000403714
ENSMUSG00000006728	Cdk4	734.324	863.422	1403.56	1325.79	798.873	1364.67	-1.70837	-0.772623	2.15616e-05	0.000328943
ENSMUSG00000033855	Ston1	393.784	288.187	582.117	584.217	340.986	583.167	-1.70984	-0.773859	0.00125576	0.0100179
ENSMUSG00000048612	Myof	965.048	848.614	1570.91	1534.44	906.831	1552.67	-1.71206	-0.775731	6.39117e-06	0.000117707
ENSMUSG00000046447	Camk2n1	844.14	617.381	1209.22	1293.62	730.761	1251.42	-1.71228	-0.775921	0.000283599	0.00294609
ENSMUSG00000057863	Rpl36	1648.35	2237.15	3687.94	2967.16	1942.75	3327.55	-1.71286	-0.776406	0.000233809	0.00251092
ENSMUSG00000025821	Zfp282	296.17	312.108	500.243	541.618	304.139	520.93	-1.71299	-0.776517	0.000329513	0.00335079
ENSMUSG00000029528	Pxn	1262.33	1405.62	2254.69	2319.48	1333.98	2287.09	-1.71458	-0.777859	1.22486e-06	2.83375e-05
ENSMUSG00000018537	Pcgf2	204.102	218.703	327.497	397.303	211.403	362.4	-1.71462	-0.77789	0.00230726	0.0164226
ENSMUSG00000032875	Arhgef17	993.889	1255.27	1977.58	1888.27	1124.58	1932.93	-1.71894	-0.781519	2.75971e-05	0.000404266
ENSMUSG00000063605	Ccdc102a	184.136	209.591	346.391	330.361	196.863	338.376	-1.71904	-0.781602	0.00190402	0.0140627
ENSMUSG00000025743	Sdc3	1189.12	1140.22	1767.04	2238.63	1164.67	2002.84	-1.71973	-0.782182	3.08717e-05	0.000445663
ENSMUSG00000022791	Tnk2	978.359	1092.38	1838.12	1723.96	1035.37	1781.04	-1.72026	-0.782631	3.27696e-06	6.60964e-05
ENSMUSG00000020422	Tns3	790.896	578.653	1073.36	1283.19	684.774	1178.28	-1.72053	-0.782852	0.00050373	0.00473465
ENSMUSG00000030199	Etv6	830.829	764.323	1371.17	1373.61	797.576	1372.39	-1.72061	-0.782917	4.05199e-06	7.93131e-05
ENSMUSG00000023411	Nfatc4	251.8	300.717	475.051	475.546	276.258	475.298	-1.7208	-0.783075	0.000666382	0.00597376
ENSMUSG00000041120	Nbl1	780.913	726.733	1278.5	1317.1	753.823	1297.8	-1.72156	-0.783716	4.68589e-06	9.02758e-05
ENSMUSG00000030340	Scnn1a	439.263	363.366	515.538	866.763	401.315	691.15	-1.72231	-0.784345	0.00690178	0.0390242
ENSMUSG00000041362	Shtn1	266.22	216.425	444.46	387.74	241.323	416.1	-1.72375	-0.785548	0.00167624	0.0127195
ENSMUSG00000070713	Gm10282	193.01	260.849	432.764	349.487	226.929	391.126	-1.7238	-0.785592	0.00444536	0.0274706
ENSMUSG00000035783	Acta2	3640.56	3990.2	7285.91	5870.86	3815.38	6578.39	-1.72417	-0.7859	5.20545e-06	9.92032e-05
ENSMUSG00000056025	Clca3a1	328.338	244.902	446.26	542.488	286.62	494.374	-1.72461	-0.786271	0.00233139	0.0165247
ENSMUSG00000026235	Epha4	163.06	146.941	260.018	274.721	155.001	267.37	-1.72481	-0.786438	0.00387284	0.0246614
ENSMUSG00000026930	Gpsm1	229.615	211.869	388.678	372.96	220.742	380.819	-1.72496	-0.786563	0.000975269	0.00814124
ENSMUSG00000006333	Rps9	4770.89	5805.89	9735.84	8515.49	5288.39	9125.66	-1.72562	-0.787118	4.2663e-06	8.27943e-05
ENSMUSG00000028766	Alpl	301.716	328.055	518.237	568.569	314.886	543.403	-1.72596	-0.787403	0.00027481	0.00286791
ENSMUSG00000054428	Atpif1	310.59	320.081	643.298	445.987	315.336	544.643	-1.72694	-0.788219	0.00236937	0.0167521
ENSMUSG00000021782	Dlg5	553.516	526.255	865.528	999.777	539.886	932.652	-1.72755	-0.788729	4.41978e-05	0.000598875
ENSMUSG00000024885	Aldh3b1	129.782	134.411	211.433	245.163	132.097	228.298	-1.72856	-0.789571	0.00697335	0.0393169
ENSMUSG00000020186	Csrp2	307.262	391.843	672.089	536.402	349.553	604.245	-1.72875	-0.789729	0.00122788	0.00984661
ENSMUSG00000012405	Rpl15	2275.07	2880.73	4820.68	4093.87	2577.9	4457.28	-1.72907	-0.789998	2.43516e-05	0.000365475
ENSMUSG00000081684	Rps2-ps13	248.472	356.532	518.237	527.708	302.502	522.973	-1.72931	-0.790196	0.00198359	0.014522
ENSMUSG00000014329	Bicc1	461.448	413.486	699.08	816.34	437.467	757.71	-1.73202	-0.792457	0.000134955	0.00157256
ENSMUSG00000030811	Fbxl19	310.59	377.035	592.913	598.997	343.813	595.955	-1.73369	-0.793842	0.00028675	0.00296913
ENSMUSG00000008668	Rps18	4134.18	4736.29	8417.75	6963.66	4435.24	7690.71	-1.73401	-0.79411	3.51303e-06	7.03225e-05
ENSMUSG00000034684	Sema3f	503.6	567.262	950.101	906.754	535.431	928.428	-1.7341	-0.794191	2.65225e-05	0.000391774
ENSMUSG00000058056	Palld	1463.1	1214.26	2556.1	2089.97	1338.68	2323.03	-1.73515	-0.795061	3.50013e-05	0.000495379
ENSMUSG00000030091	Nup210	329.447	296.161	543.429	542.488	312.804	542.958	-1.73558	-0.795422	0.000207095	0.00226739
ENSMUSG00000040296	Ddx58	956.174	923.794	1107.55	2156.04	939.984	1631.8	-1.7361	-0.795849	0.00665498	0.0379255
ENSMUSG00000027186	Elf5	391.566	337.168	528.134	737.227	364.367	632.68	-1.73645	-0.796139	0.00151014	0.0116628
ENSMUSG00000037447	Arid5a	235.161	264.267	422.867	444.249	249.714	433.558	-1.7365	-0.796186	0.000584789	0.00535626
ENSMUSG00000026594	Ralgps2	126.455	129.855	233.027	212.127	128.155	222.577	-1.7367	-0.796346	0.00627939	0.036148
ENSMUSG00000000567	Sox9	455.902	436.268	609.108	942.398	446.085	775.753	-1.73922	-0.79844	0.00208789	0.0151737
ENSMUSG00000027797	Dclk1	541.314	557.01	986.989	924.142	549.162	955.566	-1.74002	-0.799108	1.20468e-05	0.000201125
ENSMUSG00000020844	Nxn	540.205	439.685	976.193	730.272	489.945	853.232	-1.74112	-0.800013	0.000693469	0.00616787
ENSMUSG00000006412	Pfdn2	169.715	257.432	424.666	319.059	213.574	371.863	-1.74145	-0.800287	0.00939497	0.0498576
ENSMUSG00000072694	1500011B03Rik	159.732	133.272	243.823	266.897	146.502	255.36	-1.74278	-0.801393	0.004926	0.0298035
ENSMUSG00000028583	Pdpn	218.522	200.478	395.875	334.708	209.5	365.292	-1.74326	-0.801788	0.00151183	0.0116702
ENSMUSG00000044949	Ubtd2	117.581	104.795	188.041	199.955	111.188	193.998	-1.7446	-0.802894	0.00944317	0.0499966
ENSMUSG00000052684	Jun	882.964	1110.6	1812.03	1667.45	996.783	1739.74	-1.74549	-0.803631	2.34583e-05	0.00035543
ENSMUSG00000033327	Tnxb	3847.99	3727.07	6082.99	7139.28	3787.53	6611.13	-1.74552	-0.803655	3.07004e-07	8.31265e-06
ENSMUSG00000029007	Agtrap	509.146	476.135	846.634	875.457	492.641	861.045	-1.74775	-0.805496	1.69374e-05	0.000269203
ENSMUSG00000055172	C1ra	1508.58	1111.74	2305.97	2278.62	1310.16	2292.3	-1.74947	-0.806918	4.79958e-05	0.000642126
ENSMUSG00000013236	Ptprs	1134.76	1238.18	2137.73	2014.33	1186.47	2076.03	-1.7498	-0.807186	6.16399e-07	1.5656e-05
ENSMUSG00000079499	6530402F18Rik	189.682	154.915	306.803	296.456	172.298	301.63	-1.75016	-0.807487	0.00270734	0.0186526
ENSMUSG00000021190	Lgmn	948.409	943.158	1656.38	1656.15	945.784	1656.27	-1.7512	-0.808347	4.66075e-07	1.21839e-05
ENSMUSG00000013846	St3gal1	1722.67	1989.97	3415.33	3090.61	1856.32	3252.97	-1.75242	-0.809349	1.06765e-06	2.52142e-05
ENSMUSG00000059901	Adamts14	154.186	154.915	304.104	238.208	154.55	271.156	-1.75418	-0.810794	0.0047593	0.0290158
ENSMUSG00000007950	Abhd8	136.438	164.027	267.216	259.942	150.233	263.579	-1.75484	-0.811336	0.00375763	0.0241113
ENSMUSG00000033161	Atp1a1	2988.32	2799.86	4750.51	5412.71	2894.09	5081.61	-1.75586	-0.812178	1.81256e-07	5.28601e-06
ENSMUSG00000018819	Lsp1	911.804	992.138	1854.32	1490.1	951.971	1672.21	-1.75654	-0.812736	1.95027e-05	0.00030212
ENSMUSG00000001750	Tcirg1	701.047	691.421	1048.17	1400.56	696.234	1224.36	-1.75869	-0.814502	0.000110001	0.0013116
ENSMUSG00000110631	Gm42047	161.951	176.557	281.611	313.843	169.254	297.727	-1.7594	-0.815081	0.00208445	0.0151556
ENSMUSG00000040811	Eml2	359.397	489.804	839.436	654.637	424.601	747.036	-1.75954	-0.815201	0.00106976	0.00878242
ENSMUSG00000107176	Gm9794	961.72	1196.03	2072.05	1728.31	1078.88	1900.18	-1.76133	-0.816662	3.57099e-05	0.000504959
ENSMUSG00000026547	Tagln2	1586.23	1559.4	2889.89	2651.58	1572.81	2770.74	-1.76159	-0.816881	1.21166e-07	3.80595e-06
ENSMUSG00000014599	Csf1	657.786	806.468	1210.12	1369.26	732.127	1289.69	-1.76183	-0.817073	3.19747e-05	0.000459084
ENSMUSG00000022995	Enah	651.13	455.632	943.803	1008.47	553.381	976.137	-1.76367	-0.818577	0.000385786	0.00379546
ENSMUSG00000020902	Ntn1	1095.94	1012.64	1724.76	1997.82	1054.29	1861.29	-1.76545	-0.820033	2.59547e-06	5.4066e-05
ENSMUSG00000046711	Hmga1	194.119	203.895	372.483	330.361	199.007	351.422	-1.76582	-0.820337	0.00101962	0.00845378
ENSMUSG00000056481	Cd248	1230.16	1260.96	2272.68	2126.48	1245.56	2199.58	-1.76593	-0.820425	1.70857e-07	5.04758e-06
ENSMUSG00000029478	Ncor2	1528.55	1901.12	3040.14	3018.46	1714.84	3029.3	-1.76663	-0.821004	2.82044e-06	5.80674e-05
ENSMUSG00000024302	Dtna	113.144	108.213	206.935	184.307	110.678	195.621	-1.76718	-0.821452	0.00789955	0.0434298
ENSMUSG00000031963	Bmper	271.766	257.432	473.251	462.505	264.599	467.878	-1.76811	-0.822212	0.000211338	0.00230226
ENSMUSG00000028977	Casz1	452.574	429.433	736.868	823.295	441.004	780.081	-1.7689	-0.822854	3.03526e-05	0.000438966
ENSMUSG00000002602	Axl	2100.92	2238.29	3563.78	4113	2169.61	3838.39	-1.76923	-0.823125	3.01093e-07	8.20165e-06
ENSMUSG00000023064	Sncg	2968.36	1586.74	3996.54	4069.53	2277.55	4033.03	-1.77068	-0.824306	0.00228962	0.0163629
ENSMUSG00000040857	Erf	248.472	337.168	505.641	531.186	292.82	518.413	-1.77091	-0.824495	0.000817419	0.00710725
ENSMUSG00000033763	Mtss2	738.761	792.8	1470.14	1244.07	765.78	1357.1	-1.77215	-0.825504	8.37129e-06	0.000147837
ENSMUSG00000033722	BC034090	128.673	123.021	238.425	207.78	125.847	223.102	-1.77249	-0.82578	0.00523024	0.031298
ENSMUSG00000058297	Spock2	316.136	301.856	525.435	570.308	308.996	547.871	-1.77308	-0.826255	0.000112579	0.00134032
ENSMUSG00000039759	Thap3	214.085	231.233	422.867	366.875	222.659	394.871	-1.77341	-0.826522	0.000698944	0.00620962
ENSMUSG00000040860	Crocc	119.799	133.272	240.224	208.649	126.536	224.437	-1.77374	-0.826795	0.00547731	0.032463
ENSMUSG00000000740	Rpl13	5534.05	6442.64	11483.1	9761.3	5988.34	10622.2	-1.77382	-0.826861	7.62349e-07	1.88356e-05
ENSMUSG00000022865	Cxadr	1547.4	898.734	1941.59	2398.6	1223.07	2170.09	-1.77417	-0.827146	0.00192149	0.0141718
ENSMUSG00000019590	Cyb561	587.903	554.732	974.393	1053.68	571.317	1014.04	-1.77489	-0.827733	5.98911e-06	0.000111334
ENSMUSG00000036446	Lum	4165.24	3856.92	7416.37	6830.65	4011.08	7123.51	-1.77592	-0.828565	1.76498e-08	7.08398e-07
ENSMUSG00000029810	Tmem176b	1982.23	1586.74	3134.61	3204.5	1784.48	3169.56	-1.77607	-0.828691	2.46547e-06	5.19711e-05
ENSMUSG00000026421	Csrp1	2759.82	2545.84	4965.54	4460.74	2652.83	4713.14	-1.77658	-0.829107	7.61606e-08	2.51852e-06
ENSMUSG00000031822	Gse1	354.96	382.731	656.793	653.767	368.846	655.28	-1.7767	-0.829199	3.85041e-05	0.000535434
ENSMUSG00000020211	Sf3a2	231.833	274.518	460.655	439.032	253.176	449.844	-1.77707	-0.829497	0.000408453	0.00397304
ENSMUSG00000063160	Numbl	300.607	382.731	617.206	597.258	341.669	607.232	-1.77759	-0.829921	0.000243825	0.00259742
ENSMUSG00000046805	Mpeg1	1085.96	799.634	1536.72	1816.99	942.795	1676.85	-1.77847	-0.830634	0.00010876	0.00129972
ENSMUSG00000020681	Ace	1539.64	1209.7	2072.05	2820.24	1374.67	2446.14	-1.77941	-0.831402	0.00015056	0.0017328
ENSMUSG00000027230	Creb3l1	379.364	297.3	690.083	514.668	338.332	602.375	-1.77992	-0.831814	0.00116708	0.0094348
ENSMUSG00000078485	Plekhn1	218.522	187.948	374.282	349.487	203.235	361.885	-1.78022	-0.832055	0.000881777	0.00754318
ENSMUSG00000026238	Ptma	4305	5329.75	8757.84	8394.65	4817.38	8576.25	-1.78031	-0.83213	6.08982e-07	1.55364e-05
ENSMUSG00000035268	Pkig	347.195	382.731	638.799	660.722	364.963	649.761	-1.78055	-0.832325	4.58084e-05	0.000619098
ENSMUSG00000010358	Ifi35	305.044	380.453	511.039	709.407	342.748	610.223	-1.78087	-0.832582	0.00131182	0.0103474
ENSMUSG00000018378	Cuedc1	623.399	738.124	1356.77	1068.46	680.761	1212.62	-1.78129	-0.83292	7.76982e-05	0.000975462
ENSMUSG00000036545	Adamts2	2169.69	1596.99	3989.34	2722.87	1883.34	3356.11	-1.78186	-0.833387	0.0005077	0.00476863
ENSMUSG00000034330	Plcg2	254.018	222.121	409.371	439.902	238.069	424.637	-1.78349	-0.834704	0.000417626	0.00404494
ENSMUSG00000022533	Atp13a3	3197.97	2501.42	6019.11	4151.25	2849.69	5085.18	-1.78438	-0.835421	0.000209424	0.00228612
ENSMUSG00000074622	Mafb	758.728	644.719	1263.2	1244.07	701.723	1253.64	-1.78631	-0.836986	5.0592e-06	9.66478e-05
ENSMUSG00000004665	Cnn2	610.088	822.416	1428.75	1130.18	716.252	1279.47	-1.78645	-0.837098	0.000246081	0.00261124
ENSMUSG00000042712	Tceal9	582.357	615.103	1108.45	1032.81	598.73	1070.63	-1.78819	-0.838499	3.19409e-06	6.48364e-05
ENSMUSG00000018008	Cyth4	415.969	414.625	750.364	735.488	415.297	742.926	-1.78888	-0.839053	1.30948e-05	0.000215902
ENSMUSG00000027750	Postn	9566.18	7833.45	17574.2	13569.1	8699.82	15571.7	-1.78985	-0.839842	1.10872e-05	0.000186674
ENSMUSG00000031075	Ano1	2278.4	1830.5	3358.64	3999.98	2054.45	3679.31	-1.79085	-0.840646	7.3286e-06	0.000131915
ENSMUSG00000030772	Dkk3	299.498	287.048	511.939	539.01	293.273	525.475	-1.79174	-0.841361	9.01928e-05	0.00110526
ENSMUSG00000023022	Lima1	1760.38	1882.9	3234.48	3293.18	1821.64	3263.83	-1.79175	-0.84137	1.82716e-08	7.2967e-07
ENSMUSG00000005973	Rcn1	800.879	724.455	1476.44	1257.98	762.667	1367.21	-1.79247	-0.841946	6.27288e-06	0.000115797
ENSMUSG00000068335	Dok1	138.656	120.742	234.826	230.383	129.699	232.605	-1.79305	-0.842418	0.00367843	0.0237084
ENSMUSG00000039477	Tnrc18	1728.21	1843.03	3127.42	3276.66	1785.62	3202.04	-1.7933	-0.842614	2.37784e-08	9.04148e-07
ENSMUSG00000034993	Vat1	1344.41	1549.15	2586.69	2602.03	1446.78	2594.36	-1.7933	-0.842614	2.34684e-07	6.63713e-06
ENSMUSG00000020776	Fbf1	411.532	523.977	840.336	837.204	467.754	838.77	-1.79349	-0.842772	6.53639e-05	0.000839849
ENSMUSG00000027010	Slc25a12	358.288	307.552	742.266	452.942	332.92	597.604	-1.79461	-0.84367	0.00351522	0.0228979
ENSMUSG00000019659	Ccdc12	214.085	249.458	470.552	361.658	231.772	416.105	-1.79531	-0.844231	0.0013094	0.0103373
ENSMUSG00000034892	Rps29	1199.1	1579.9	2881.79	2107.36	1389.5	2494.57	-1.79534	-0.844256	0.000178926	0.00200272
ENSMUSG00000025813	Homer2	269.548	205.034	456.156	396.433	237.291	426.295	-1.7959	-0.844711	0.0011159	0.00910014
ENSMUSG00000118669	Arvcf	212.976	227.816	373.383	418.168	220.396	395.775	-1.79603	-0.844813	0.000449632	0.00429732
ENSMUSG00000022565	Plec	3141.4	3706.57	6570.63	5732.63	3423.98	6151.63	-1.79666	-0.845315	5.02773e-07	1.3036e-05
ENSMUSG00000060227	Golm2	325.01	218.703	481.349	497.28	271.857	489.314	-1.79938	-0.8475	0.00151006	0.0116628
ENSMUSG00000020122	Egfr	1162.49	1139.08	1938.89	2206.46	1150.79	2072.68	-1.80114	-0.848913	3.3364e-07	8.98791e-06
ENSMUSG00000038167	Plekhg6	136.438	148.08	223.13	289.501	142.259	256.315	-1.80226	-0.84981	0.00432782	0.0269328
ENSMUSG00000021876	Rnase4	2254	1830.5	3523.29	3847.84	2042.25	3685.56	-1.80459	-0.851671	1.12596e-06	2.63932e-05
ENSMUSG00000033436	Armcx2	372.708	284.77	633.401	553.789	328.739	593.595	-1.80517	-0.852134	0.000357381	0.00357022
ENSMUSG00000037788	Vopp1	337.212	296.161	663.991	479.893	316.686	571.942	-1.80559	-0.852469	0.000770605	0.0067482
ENSMUSG00000028214	Gem	105.379	154.915	245.623	224.298	130.147	234.96	-1.80599	-0.852791	0.00804876	0.0441112
ENSMUSG00000025212	Sfxn3	476.978	443.102	859.23	804.168	460.04	831.699	-1.8077	-0.854158	8.45968e-06	0.000148425
ENSMUSG00000054728	Phactr1	147.53	110.491	252.82	213.865	129.011	233.343	-1.80789	-0.854307	0.00646774	0.0369911
ENSMUSG00000043079	Synpo	892.947	750.654	1519.62	1453.59	821.8	1486.61	-1.80876	-0.855001	2.42741e-06	5.13731e-05
ENSMUSG00000002111	Spi1	176.371	222.121	386.878	333.839	199.246	360.358	-1.80888	-0.855095	0.00130457	0.0103238
ENSMUSG00000012017	Scarf2	600.105	551.315	1040.07	1043.25	575.71	1041.66	-1.80923	-0.855374	2.15321e-06	4.64328e-05
ENSMUSG00000017929	B4galt5	248.472	252.876	462.455	445.118	250.674	453.786	-1.81025	-0.856191	0.000135491	0.00157649
ENSMUSG00000043895	S1pr2	356.07	348.558	591.114	685.065	352.314	638.089	-1.81126	-0.85699	5.1841e-05	0.000686609
ENSMUSG00000020614	Fam20a	198.556	151.498	302.305	332.1	175.027	317.202	-1.81189	-0.857495	0.00199231	0.0145791
ENSMUSG00000001555	Fkbp10	312.809	379.314	718.874	535.533	346.061	627.203	-1.81243	-0.857924	0.000562423	0.00518212
ENSMUSG00000029672	Fam3c	604.542	729.011	1205.62	1211.9	666.776	1208.76	-1.81306	-0.85843	5.35557e-06	0.000101335
ENSMUSG00000027692	Tnik	178.589	194.783	325.698	351.226	186.686	338.462	-1.8133	-0.858619	0.000663171	0.00595505
ENSMUSG00000024079	Eif2ak2	642.256	596.878	860.129	1388.39	619.567	1124.26	-1.81472	-0.859746	0.000884658	0.00756361
ENSMUSG00000022952	Runx1	937.317	789.382	1510.62	1623.99	863.35	1567.31	-1.81525	-0.86017	2.13818e-06	4.61743e-05
ENSMUSG00000024697	Gna14	164.169	184.531	261.818	371.222	174.35	316.52	-1.81601	-0.860769	0.00366249	0.0236248
ENSMUSG00000037563	Rps16	2923.99	3032.23	5750.99	5079.74	2978.11	5415.36	-1.81838	-0.862651	1.47137e-08	6.0668e-07
ENSMUSG00000051043	Gprc5c	396.003	427.155	767.459	730.272	411.579	748.865	-1.81957	-0.863599	1.07296e-05	0.000181615
ENSMUSG00000052727	Map1b	634.491	609.408	968.095	1296.23	621.95	1132.16	-1.82047	-0.864312	5.74268e-05	0.000751847
ENSMUSG00000023805	Synj2	383.801	288.187	642.398	581.609	335.994	612.004	-1.82098	-0.864712	0.000270167	0.00283621
ENSMUSG00000035407	Kank4	199.665	198.2	343.692	380.785	198.933	362.238	-1.82104	-0.864759	0.000441277	0.00422764
ENSMUSG00000036114	Rpp25l	137.547	119.603	231.227	237.338	128.575	234.283	-1.82184	-0.865399	0.00286401	0.0195033
ENSMUSG00000021948	Prkcd	597.886	577.513	997.786	1144.96	587.7	1071.37	-1.82306	-0.866361	3.65845e-06	7.26842e-05
ENSMUSG00000028803	Nipal3	230.724	199.339	391.377	393.825	215.032	392.601	-1.82548	-0.868276	0.000339013	0.00342765
ENSMUSG00000048897	Zfp710	301.716	369.062	577.618	646.812	335.389	612.215	-1.82582	-0.868545	0.000112956	0.0013428
ENSMUSG00000032334	Loxl1	1747.07	1713.18	3239.88	3078.44	1730.12	3159.16	-1.82594	-0.868639	5.49042e-09	2.5283e-07
ENSMUSG00000030602	Pak4	241.817	333.75	543.429	507.713	287.784	525.571	-1.8267	-0.869236	0.00051004	0.00477982
ENSMUSG00000034614	Pik3ip1	229.615	222.121	367.085	458.159	225.868	412.622	-1.82702	-0.869495	0.000524998	0.00489402
ENSMUSG00000075602	Ly6a	2911.78	2232.6	3489.1	5911.72	2572.19	4700.41	-1.8274	-0.869794	0.000890328	0.0075876
ENSMUSG00000004266	Ptpn6	227.396	213.008	417.469	387.74	220.202	402.604	-1.8281	-0.870343	0.000239767	0.00256106
ENSMUSG00000070047	Fat1	2097.59	2131.22	3653.75	4077.35	2114.41	3865.55	-1.82824	-0.870457	1.24727e-08	5.23062e-07
ENSMUSG00000018830	Myh11	2059.88	2271.33	4149.49	3774.81	2165.6	3962.15	-1.82961	-0.871535	2.55319e-08	9.50362e-07
ENSMUSG00000023367	Tmem176a	1201.32	1078.71	2128.73	2044.76	1140.01	2086.75	-1.83034	-0.87211	9.31935e-08	3.0106e-06
ENSMUSG00000031398	Plxna3	207.43	208.452	359.887	401.65	207.941	380.768	-1.8313	-0.872867	0.00032369	0.0032979
ENSMUSG00000026956	Uap1l1	246.254	265.406	459.755	477.285	255.83	468.52	-1.83158	-0.87309	9.95173e-05	0.00120192
ENSMUSG00000025867	Cplx2	150.858	132.133	295.107	223.428	141.496	259.268	-1.83171	-0.873188	0.00392244	0.0248876
ENSMUSG00000026121	Sema4c	454.793	487.526	861.929	865.894	471.159	863.911	-1.83371	-0.874762	3.12392e-06	6.38194e-05
ENSMUSG00000059291	Rpl11	2366.03	3282.83	5573.75	4790.24	2824.43	5181.99	-1.83476	-0.875592	1.74356e-05	0.000275743
ENSMUSG00000038034	Igsf8	347.195	536.507	860.129	761.569	441.851	810.849	-1.83546	-0.876142	0.000668025	0.00598479
ENSMUSG00000040447	Spns2	723.232	734.706	1193.92	1482.28	728.969	1338.1	-1.83575	-0.876371	5.70812e-06	0.000107113
ENSMUSG00000022180	Slc7a8	269.548	215.286	414.77	475.546	242.417	445.158	-1.83608	-0.876626	0.000442299	0.00423488
ENSMUSG00000019899	Lama2	1435.37	1166.42	2257.39	2520.31	1300.89	2388.85	-1.83622	-0.876739	1.61519e-06	3.62597e-05
ENSMUSG00000049988	Lrrc25	89.8493	93.4045	154.751	181.699	91.6269	168.225	-1.83634	-0.876836	0.00867943	0.0466681
ENSMUSG00000040699	Limd2	268.439	337.168	574.019	538.141	302.803	556.08	-1.83676	-0.877164	0.000144195	0.00166558
ENSMUSG00000052151	Plpp2	291.733	291.604	526.334	545.096	291.669	535.715	-1.83677	-0.877169	3.80867e-05	0.000531009
ENSMUSG00000001288	Rarg	739.87	895.317	1426.95	1577.91	817.593	1502.43	-1.83786	-0.87803	3.10093e-06	6.34314e-05
ENSMUSG00000049804	Armcx4	503.6	389.565	814.244	827.641	446.583	820.943	-1.83795	-0.878097	4.50194e-05	0.000608968
ENSMUSG00000036764	Dnajc12	225.178	169.723	320.299	405.996	197.45	363.148	-1.83895	-0.878879	0.00193484	0.0142636
ENSMUSG00000071637	Cebpd	514.692	601.434	1112.05	940.66	558.063	1026.35	-1.83921	-0.879084	1.48037e-05	0.000238389
ENSMUSG00000042303	Sgsm3	260.674	263.127	480.449	483.37	261.901	481.91	-1.84008	-0.879765	6.26386e-05	0.000809865
ENSMUSG00000046761	Fam83h	354.96	318.942	554.226	685.934	336.951	620.08	-1.8403	-0.879939	0.000109754	0.00130963
ENSMUSG00000001870	Ltbp1	1336.65	1238.18	2188.11	2550.74	1287.41	2369.42	-1.84046	-0.880067	2.57365e-07	7.18902e-06
ENSMUSG00000024236	Svil	2380.45	2066.29	4036.13	4153.86	2223.37	4094.99	-1.84173	-0.881062	2.14553e-08	8.39929e-07
ENSMUSG00000036334	Igsf10	513.583	369.062	802.548	825.033	441.322	813.79	-1.84361	-0.882535	0.000126842	0.00148565
ENSMUSG00000023915	Tnfrsf21	924.006	987.582	1768.84	1755.26	955.794	1762.05	-1.84362	-0.882539	5.16891e-08	1.80958e-06
ENSMUSG00000032359	Ctsh	909.586	789.382	1677.97	1457.07	849.484	1567.52	-1.84505	-0.883656	1.72965e-06	3.86111e-05
ENSMUSG00000020668	Kif3c	189.682	135.55	302.305	298.194	162.616	300.25	-1.84569	-0.884159	0.00229452	0.0163759
[truncated: 971 more rows]

## Sheet: DEGs AV vs CV
gene_id	gene_name	AV1	AV2	CV1	CV2	AV	CV	FC	log2FoldChange	pvalue	padj
ENSMUSG00000032484	Ngp	213.135	53.2157	0	0	133.176	0	785.688	9.61781	1.40392e-05	0.000518786
ENSMUSG00000050276	Mrgprg	98.6932	42.1291	0	0	70.4112	0	415.697	8.69939	3.9519e-08	2.88655e-06
ENSMUSG00000032496	Ltf	176.388	46.5638	0	0.94525	111.476	0.472625	241.878	7.91813	4.19056e-07	2.44413e-05
ENSMUSG00000005800	Mmp8	54.5962	31.0425	0	0.94525	42.8194	0.472625	92.8571	6.53694	5.35074e-05	0.00157807
ENSMUSG00000094198	Ighv1-50	43.047	24.3905	0.898465	0	33.7188	0.449233	73.3545	6.19681	0.000188606	0.00444612
ENSMUSG00000110755	BC049987	36.7475	67.6283	0.898465	0.94525	52.1879	0.921858	56.601	5.82276	2.09585e-06	9.80847e-05
ENSMUSG00000056071	S100a9	492.416	176.277	6.28926	5.6715	334.347	5.98038	55.8862	5.80442	3.41905e-23	4.11101e-20
ENSMUSG00000038357	Camp	37.7974	9.97795	0.898465	0	23.8877	0.449233	52.034	5.70138	0.00136242	0.0216864
ENSMUSG00000026822	Lcn2	175.338	85.3669	1.79693	3.781	130.352	2.78897	47.086	5.55723	4.51842e-13	8.61311e-11
ENSMUSG00000058626	Capn11	40.9472	74.2803	0	2.83575	57.6137	1.41788	41.4032	5.37167	5.56305e-07	3.1167e-05
ENSMUSG00000056054	S100a8	370.625	190.69	7.18772	6.61675	280.657	6.90224	40.6527	5.34528	5.90584e-24	9.23142e-21
ENSMUSG00000096632	Igkv9-124	20.9986	47.6724	0.898465	0.94525	34.3355	0.921858	37.2284	5.21833	7.44586e-05	0.00207093
ENSMUSG00000094345	Igkv14-126	256.182	55.4331	7.18772	2.83575	155.808	5.01174	30.9347	4.95115	3.64658e-11	4.7899e-09
ENSMUSG00000076538	Igkv13-84	75.5948	27.7165	0.898465	2.83575	51.6557	1.86711	27.9379	4.80415	3.04665e-06	0.000135885
ENSMUSG00000095630	Igkv6-23	30.4479	272.731	7.18772	4.72625	151.589	5.95699	25.4225	4.66803	0.000916816	0.0158002
ENSMUSG00000038754	Elovl3	688.753	320.403	27.8524	16.0693	504.578	21.9608	22.9197	4.51852	5.04195e-28	8.75674e-25
ENSMUSG00000070424	Art5	3.14978	58.759	0	2.83575	30.9544	1.41788	22.083	4.46487	0.00211994	0.030998
ENSMUSG00000096490	Igkv10-94	31.4978	48.7811	1.79693	1.8905	40.1395	1.84372	21.7676	4.44411	1.53125e-05	0.000554052
ENSMUSG00000076614	Ighg1	140.69	117.518	7.18772	4.72625	129.104	5.95699	21.6038	4.43321	3.04926e-14	7.56556e-12
ENSMUSG00000095285	Ighv5-9	44.097	15.5213	0	2.83575	29.8091	1.41788	21.3763	4.41794	0.000483006	0.00935548
ENSMUSG00000076672	Ighv3-6	79.7945	68.737	5.39079	1.8905	74.2658	3.64065	20.2445	4.33946	8.77604e-09	7.4675e-07
ENSMUSG00000096108	Ighv11-2	87.144	35.4772	3.59386	2.83575	61.3106	3.21481	19.0554	4.25213	6.4465e-07	3.56061e-05
ENSMUSG00000076583	Igkv8-24	16.7988	100.888	0.898465	5.6715	58.8435	3.28498	18.0471	4.17369	3.29922e-05	0.0010655
ENSMUSG00000076615	Ighg3	253.033	310.425	2.6954	30.248	281.729	16.4717	17.1257	4.09809	0.00256524	0.0358484
ENSMUSG00000076591	Igkv8-16	23.0984	19.9559	0.898465	1.8905	21.5272	1.39448	15.5267	3.95668	0.00182943	0.0274432
ENSMUSG00000023153	Tmem52	16.7988	52.1071	0	4.72625	34.453	2.36313	14.7473	3.88238	0.000691488	0.0125549
ENSMUSG00000095204	Ighv1-52	24.1483	28.8252	2.6954	0.94525	26.4868	1.82032	14.4429	3.85229	0.000701831	0.0126824
ENSMUSG00000085779	Atcayos	14.699	85.3669	1.79693	5.6715	50.0329	3.73422	13.4581	3.7504	0.00015561	0.00384257
ENSMUSG00000022066	Entpd4b	79.7945	78.7149	6.28926	5.6715	79.2547	5.98038	13.2429	3.72714	8.76522e-09	7.4675e-07
ENSMUSG00000102888	Ighv1-11	53.5463	49.8897	6.28926	1.8905	51.718	4.08988	12.5549	3.65018	6.9989e-06	0.000279081
ENSMUSG00000094561	Ighv1-22	20.9986	24.3905	1.79693	1.8905	22.6946	1.84372	12.3108	3.62185	0.00192046	0.0284268
ENSMUSG00000105906	Iglc1	163.789	139.691	13.477	11.343	151.74	12.41	12.2158	3.61067	2.45473e-14	6.39499e-12
ENSMUSG00000020799	Tekt1	36.7475	58.759	4.49233	3.781	47.7533	4.13666	11.5232	3.52648	1.65605e-05	0.000595075
ENSMUSG00000095127	Ighv1-82	46.1968	48.7811	4.49233	3.781	47.489	4.13666	11.4655	3.51923	1.19346e-05	0.000450602
ENSMUSG00000076612	Ighg2c	618.408	776.063	103.323	19.8503	697.235	61.5869	11.3155	3.50023	0.000790409	0.0139288
ENSMUSG00000111250	Gm47818	56.6961	26.6079	1.79693	5.6715	41.652	3.73422	11.2354	3.48998	0.000136538	0.00347028
ENSMUSG00000072720	Myo18b	22.0485	134.148	2.6954	11.343	78.0982	7.0192	11.1713	3.48172	5.88598e-05	0.00171329
ENSMUSG00000076934	Iglv1	190.037	147.452	17.9693	12.2883	168.744	15.1288	11.1317	3.4766	1.87038e-14	4.95525e-12
ENSMUSG00000036832	Lpar3	27.2981	27.7165	2.6954	2.83575	27.5073	2.76557	9.9494	3.31461	0.00109161	0.0181908
ENSMUSG00000001508	Sgca	10.4993	99.7795	4.49233	7.562	55.1394	6.02716	9.15576	3.19468	0.000839121	0.0146715
ENSMUSG00000027273	Snap25	38.8473	27.7165	3.59386	3.781	33.2819	3.68743	9.03313	3.17523	0.000521338	0.00993785
ENSMUSG00000079013	Serpina3j	266.682	134.148	23.3601	22.686	200.415	23.0231	8.70911	3.12252	3.75438e-12	6.37877e-10
ENSMUSG00000052212	Cd177	65.0955	13.3039	6.28926	2.83575	39.1997	4.5625	8.57278	3.09976	0.00155346	0.0241134
ENSMUSG00000026062	Slc9a2	30.4479	45.4551	6.28926	3.781	37.9515	5.03513	7.51217	2.90923	0.000545986	0.0103196
ENSMUSG00000032796	Lama1	62.9957	26.6079	5.39079	6.61675	44.8018	6.00377	7.47791	2.90264	0.00035345	0.00731229
ENSMUSG00000021228	Acot3	51.4465	15.5213	3.59386	5.6715	33.4839	4.63268	7.25301	2.85858	0.00279303	0.038533
ENSMUSG00000052572	Dlg2	301.329	284.926	35.9386	51.0435	293.128	43.4911	6.75085	2.75507	4.16944e-17	1.91234e-14
ENSMUSG00000040809	Chil3	102.893	33.2598	9.88312	10.3978	68.0764	10.1404	6.72203	2.7489	0.000103473	0.00274598
ENSMUSG00000021478	Drd1	50.3965	16.6299	4.49233	5.6715	33.5132	5.08191	6.61041	2.72474	0.00331143	0.0441647
ENSMUSG00000059741	Myl3	20.9986	80.9323	1.79693	14.1788	50.9654	7.98784	6.40656	2.67955	0.00355122	0.0464511
ENSMUSG00000035296	Sgcg	19.9486	109.757	5.39079	15.124	64.853	10.2574	6.33445	2.66322	0.0013735	0.0218405
ENSMUSG00000058207	Serpina3k	501.866	171.842	35.9386	71.839	336.854	53.8888	6.25413	2.64481	0.00217711	0.0317063
ENSMUSG00000072949	Acot1	109.192	89.8015	19.7662	14.1788	99.497	16.9725	5.8548	2.54962	5.30244e-07	3.00299e-05
ENSMUSG00000024222	Fkbp5	1377.51	821.518	219.226	164.474	1099.51	191.85	5.72957	2.51843	6.82077e-21	5.07693e-18
ENSMUSG00000045776	Lrtm1	266.682	283.817	35.0401	61.4413	275.249	48.2407	5.71689	2.51523	5.37753e-13	1.01272e-10
ENSMUSG00000027902	Chil6	31.4978	36.5858	3.59386	8.50725	34.0418	6.05056	5.64681	2.49744	0.00327113	0.0436644
ENSMUSG00000105837	Gm35986	75.5948	68.737	17.0708	8.50725	72.1659	12.789	5.62646	2.49223	3.23007e-05	0.00105014
ENSMUSG00000076940	Iglv2	24.1483	58.759	7.18772	7.562	41.4537	7.37486	5.61581	2.48949	0.00195469	0.0288787
ENSMUSG00000059824	Dbp	306.579	294.904	54.8064	56.715	300.741	55.7607	5.39447	2.43148	7.30905e-16	2.59654e-13
ENSMUSG00000000296	Tpd52l1	38.8473	75.389	8.98465	12.2883	57.1181	10.6365	5.37251	2.4256	0.000353688	0.00731229
ENSMUSG00000001467	Cyp51	4250.11	3725.1	712.483	794.956	3987.6	753.719	5.29149	2.40367	4.74557e-51	3.7089e-47
ENSMUSG00000022270	Retreg1	197.386	529.94	61.9941	75.62	363.663	68.8071	5.28475	2.40184	5.66137e-09	5.05674e-07
ENSMUSG00000044254	Pcsk9	33.5977	50.9984	12.5785	3.781	42.298	8.17976	5.14564	2.36335	0.00303096	0.0410545
ENSMUSG00000038132	Rbm24	51.4465	147.452	10.7816	28.3575	99.4492	19.5695	5.0906	2.34784	0.000222462	0.00503958
ENSMUSG00000094546	Ighv1-26	48.2967	161.865	33.2432	8.50725	105.081	20.8752	5.0163	2.32662	0.000662899	0.012119
ENSMUSG00000036186	Dipk1b	538.613	634.154	115.902	119.102	586.384	117.502	4.99003	2.31905	2.36892e-22	2.31429e-19
ENSMUSG00000118076	Gm50337	45.1469	131.931	24.2586	11.343	88.5388	17.8008	4.95852	2.30991	0.000325252	0.00683336
ENSMUSG00000032081	Apoc3	254.083	149.669	47.6187	34.9743	201.876	41.2965	4.88619	2.28871	1.24739e-08	1.02621e-06
ENSMUSG00000045350	Fam186a	46.1968	43.2378	10.7816	7.562	44.7173	9.17179	4.86825	2.2834	0.00127181	0.0204104
ENSMUSG00000019880	Rspo3	251.983	139.691	47.6187	33.0838	195.837	40.3512	4.85061	2.27817	4.76625e-08	3.3711e-06
ENSMUSG00000021751	Acox2	35.6975	50.9984	9.88312	8.50725	43.348	9.19519	4.70841	2.23524	0.00191995	0.0284268
ENSMUSG00000006517	Mvd	577.46	1153.01	185.084	199.448	865.234	192.266	4.49941	2.16973	2.74493e-13	5.57221e-11
ENSMUSG00000032092	Mpzl2	211.036	128.605	36.8371	39.7005	169.82	38.2688	4.44129	2.15098	1.484e-07	9.50671e-06
ENSMUSG00000106535	Gm43031	65.0955	56.5417	17.9693	9.4525	60.8186	13.7109	4.4256	2.14587	0.000560675	0.0104581
ENSMUSG00000054013	Tmem179	4705.78	5161.93	1246.17	1024.65	4933.85	1135.41	4.34466	2.11924	3.98967e-39	1.03938e-35
ENSMUSG00000035226	Rims4	560.661	625.285	155.434	118.156	592.973	136.795	4.33104	2.11471	3.78945e-18	2.04251e-15
ENSMUSG00000103149	AA914427	335.977	623.068	132.074	90.744	479.522	111.409	4.29957	2.10419	2.21616e-10	2.54712e-08
ENSMUSG00000037686	Aspg	478.767	454.551	126.684	92.6345	466.659	109.659	4.25189	2.0881	1.87741e-15	6.24377e-13
ENSMUSG00000084897	Gm14226	83.9942	72.063	16.1724	20.7955	78.0286	18.4839	4.22677	2.07956	9.70446e-05	0.00259792
ENSMUSG00000019312	Grb7	97.6433	148.561	35.9386	22.686	123.102	29.3123	4.19093	2.06727	9.4523e-06	0.000366623
ENSMUSG00000045102	Poln	102.893	109.757	23.3601	27.4123	106.325	25.3862	4.19059	2.06715	6.43225e-06	0.00025913
ENSMUSG00000040907	Atp1a3	4633.33	5869.25	1583.1	966.046	5251.29	1274.57	4.11918	2.04236	5.82684e-20	3.95997e-17
ENSMUSG00000095079	Igha	3033.24	3171.88	1061.09	454.665	3102.56	757.876	4.09343	2.03331	0.000420726	0.00838822
ENSMUSG00000103731	Gm17530	47.2468	87.5842	17.0708	16.0693	67.4155	16.57	4.06412	2.02294	0.000719693	0.0129454
ENSMUSG00000021509	Slc25a48	76.6447	136.365	12.5785	40.6458	106.505	26.6121	4.01081	2.00389	0.000528427	0.0100607
ENSMUSG00000030137	Tuba8	110.242	165.19	38.634	30.248	137.716	34.441	3.99313	1.99752	3.51463e-06	0.00015519
ENSMUSG00000045294	Insig1	10356.5	13561.1	3688.2	2632.52	11958.8	3160.36	3.78368	1.91979	1.106e-22	1.23485e-19
ENSMUSG00000009378	Slc16a12	297.13	500.006	92.5419	120.992	398.568	106.767	3.73364	1.90058	2.31779e-09	2.1825e-07
ENSMUSG00000041220	Elovl6	42164.1	57943.1	17437.4	9799.41	50053.6	13618.4	3.67541	1.8779	7.08241e-05	0.00198041
ENSMUSG00000021775	Nr1d2	1054.13	951.231	251.57	300.59	1002.68	276.08	3.63348	1.86135	1.64437e-20	1.16832e-17
ENSMUSG00000053846	Lipg	307.629	281.6	81.7603	81.2915	294.614	81.5259	3.61412	1.85365	1.19458e-10	1.43635e-08
ENSMUSG00000028132	Tlcd4	276.131	181.82	55.7048	73.7295	228.976	64.7172	3.54248	1.82476	2.97226e-07	1.7938e-05
ENSMUSG00000052392	Acot4	591.109	405.77	111.41	172.981	498.44	142.195	3.50911	1.81111	9.17123e-10	9.60276e-08
ENSMUSG00000042429	Adora1	2283.59	1572.08	569.627	542.574	1927.84	556.1	3.46703	1.7937	4.05255e-18	2.11151e-15
ENSMUSG00000042010	Acacb	24746.8	19585.6	8127.52	4928.54	22166.2	6528.03	3.39544	1.7636	6.05538e-16	2.2012e-13
ENSMUSG00000043122	A530016L24Rik	10947.6	12338.3	3781.64	3178.88	11642.9	3480.26	3.34521	1.7421	1.05571e-29	2.06273e-26
ENSMUSG00000033762	Recql4	109.192	202.885	49.4156	45.372	156.039	47.3938	3.2893	1.71778	4.89358e-05	0.00147383
ENSMUSG00000007480	Mc5r	175.338	168.516	31.4463	73.7295	171.927	52.5879	3.27572	1.71181	6.38635e-05	0.0018384
ENSMUSG00000006784	Odad4	132.291	241.688	44.9233	69.9485	186.99	57.4359	3.25699	1.70354	3.83195e-05	0.00120276
ENSMUSG00000028328	Tmod1	57.746	159.647	30.5478	36.8648	108.697	33.7063	3.22312	1.68846	0.00179344	0.026955
ENSMUSG00000026922	Agpat2	23041.7	26620.1	7830.12	7594.14	24830.9	7712.13	3.21967	1.68691	7.41919e-33	1.6567e-29
ENSMUSG00000019368	Sec14l4	100.793	84.2582	32.3447	25.5218	92.5257	28.9333	3.19624	1.67638	0.000396135	0.00801033
ENSMUSG00000004748	Mtfp1	301.329	394.683	117.699	101.142	348.006	109.42	3.1782	1.66821	3.89717e-09	3.54167e-07
ENSMUSG00000029370	Rassf6	192.137	87.5842	30.5478	57.6603	139.861	44.104	3.17761	1.66794	0.000715926	0.0128924
ENSMUSG00000030103	Bhlhe40	496.616	929.058	242.586	211.736	712.837	227.161	3.13649	1.64915	1.21351e-08	1.00362e-06
ENSMUSG00000038217	Tlcd2	952.285	2002.24	530.993	414.02	1477.26	472.506	3.12614	1.64438	0.0023305	0.033359
ENSMUSG00000020889	Nr1d1	3098.34	1833.73	1007.18	585.11	2466.03	796.145	3.09735	1.63104	0.00210265	0.0308028
ENSMUSG00000067235	H2-Q10	2905.15	3430.2	1056.6	996.294	3167.67	1026.44	3.08571	1.6256	8.38439e-24	1.11945e-20
ENSMUSG00000030935	Acsm3	4490.54	2383.62	1126.68	1109.72	3437.08	1118.2	3.07403	1.62013	4.06853e-11	5.29959e-09
ENSMUSG00000034460	Six4	174.288	100.888	35.9386	53.8793	137.588	44.9089	3.06889	1.61772	0.000251971	0.00553946
ENSMUSG00000066441	Rdh11	948.085	1433.5	390.832	391.334	1190.79	391.083	3.04422	1.60607	1.20882e-12	2.17185e-10
ENSMUSG00000028716	Pdzk1ip1	103.943	215.08	65.588	39.7005	159.512	52.6442	3.02473	1.59681	0.000427599	0.00849276
ENSMUSG00000057315	Arhgap24	848.342	821.518	309.97	245.765	834.93	277.868	3.00353	1.58666	3.15604e-14	7.70814e-12
ENSMUSG00000044037	Als2cl	1193.77	1896.92	563.338	469.789	1545.34	516.564	2.99062	1.58044	1.25979e-11	1.91182e-09
ENSMUSG00000024526	Cidea	372.724	348.12	113.207	129.499	360.422	121.353	2.97139	1.57114	1.9165e-09	1.8723e-07
ENSMUSG00000020917	Acly	90812.5	155594	45164.9	39202.4	123203	42183.7	2.92062	1.54628	1.12553e-12	2.04572e-10
ENSMUSG00000042041	2010003K11Rik	501.866	653.001	206.647	189.995	577.433	198.321	2.91035	1.54119	8.76333e-11	1.07858e-08
ENSMUSG00000023861	Mpc1	1966.51	2772.76	922.724	706.102	2369.64	814.413	2.90883	1.54044	3.07463e-13	6.16148e-11
ENSMUSG00000032418	Me1	80775.2	115764	39484	28276.2	98269.7	33880.1	2.90049	1.5363	5.59445e-14	1.32495e-11
ENSMUSG00000003949	Hlf	219.435	322.62	85.3542	103.032	271.028	94.1932	2.87736	1.52475	1.88838e-06	9.08222e-05
ENSMUSG00000115925	Gm33432	152.24	290.469	85.3542	69.0033	221.354	77.1787	2.86502	1.51854	6.67027e-05	0.00188882
ENSMUSG00000058966	Tlcd3b	509.215	600.894	229.109	160.693	555.055	194.901	2.84559	1.50873	2.35071e-09	2.20023e-07
ENSMUSG00000022887	Masp1	513.415	528.831	153.638	214.572	521.123	184.105	2.83242	1.50204	1.33346e-09	1.34473e-07
ENSMUSG00000001420	Tmem79	221.535	595.351	159.927	128.554	408.443	144.24	2.82968	1.50064	0.000109376	0.00286375
ENSMUSG00000027533	Fabp5	4080.02	5687.43	1664.86	1811.1	4883.73	1737.98	2.80993	1.49053	5.66854e-16	2.10964e-13
ENSMUSG00000022389	Tef	1729.23	2165.22	676.544	709.883	1947.22	693.214	2.80881	1.48996	9.08879e-17	3.83965e-14
ENSMUSG00000003477	Inmt	1651.54	821.518	454.623	429.144	1236.53	441.884	2.79881	1.48481	9.46659e-08	6.35074e-06
ENSMUSG00000005057	Sh2b2	2183.85	2704.02	978.429	787.394	2443.94	882.911	2.76736	1.46851	2.66104e-15	8.48872e-13
ENSMUSG00000033105	Lss	1764.93	2839.28	833.776	833.711	2302.1	833.743	2.76081	1.46509	2.71526e-11	3.78948e-09
ENSMUSG00000020059	Sycp3	178.488	240.579	79.0649	72.7843	209.534	75.9246	2.75799	1.46362	1.12212e-05	0.000426761
ENSMUSG00000030256	Bhlhe41	107.093	202.885	56.6033	56.715	154.989	56.6592	2.73343	1.45071	0.000492029	0.00948323
ENSMUSG00000024889	Rce1	1950.77	1749.47	730.452	625.756	1850.12	678.104	2.72804	1.44787	6.6958e-17	2.90728e-14
ENSMUSG00000064358	mt-Co3	3486.81	3738.41	1291.09	1358.32	3612.61	1324.71	2.72713	1.44738	1.4362e-22	1.49662e-19
ENSMUSG00000028133	Rwdd3	135.441	76.4976	31.4463	47.2625	105.969	39.3544	2.69744	1.43159	0.00283624	0.0389914
ENSMUSG00000049555	Tmie	95.5434	106.431	51.2125	23.6313	100.987	37.4219	2.69315	1.42929	0.00349005	0.0459975
ENSMUSG00000024014	Pim1	1014.23	866.973	415.091	293.973	940.602	354.532	2.65215	1.40716	3.11767e-10	3.48088e-08
ENSMUSG00000028542	Slc6a9	193.187	127.496	61.9941	59.5508	160.341	60.7724	2.63964	1.40034	0.00021969	0.0049985
ENSMUSG00000022351	Sqle	620.507	1310.44	318.057	414.02	965.472	366.038	2.63746	1.39915	3.88708e-06	0.000167842
ENSMUSG00000053930	Shisa6	271.931	178.494	93.4404	78.4558	225.213	85.9481	2.62062	1.38991	4.36069e-05	0.00133914
ENSMUSG00000003528	Slc25a1	25530	35688.9	13953.2	9643.45	30609.5	11798.3	2.59433	1.37536	2.96357e-11	4.08726e-09
ENSMUSG00000024799	Tm7sf2	539.663	616.416	265.047	180.543	578.039	222.795	2.59254	1.37436	4.09793e-08	2.97929e-06
ENSMUSG00000032315	Cyp1a1	456.719	343.685	159.028	151.24	400.202	155.134	2.58028	1.36753	1.90328e-07	1.19479e-05
ENSMUSG00000025175	Fn3k	190.037	227.276	87.1511	74.6748	208.656	80.913	2.577	1.36569	2.30963e-05	0.000800483
ENSMUSG00000021591	Glrx	510.265	873.625	232.702	304.371	691.945	268.537	2.57672	1.36553	1.00571e-06	5.25759e-05
ENSMUSG00000028865	Cd164l2	100.793	74.2803	34.1417	34.029	87.5367	34.0853	2.56945	1.36146	0.00379387	0.048728
ENSMUSG00000020427	Igfbp3	2891.5	2025.52	1079.96	839.382	2458.51	959.669	2.56173	1.35712	1.05783e-10	1.2918e-08
ENSMUSG00000066687	Zbtb16	1528.69	1306	586.698	519.888	1417.35	553.293	2.56153	1.35701	9.24141e-14	2.03454e-11
ENSMUSG00000026567	Adcy10	145.94	333.707	116.8	71.839	239.823	94.3198	2.5394	1.34449	0.00122725	0.0199203
ENSMUSG00000091498	Mpc1-ps	4991.36	5988.99	2265.93	2058.76	5490.17	2162.34	2.53878	1.34414	1.68874e-17	8.24895e-15
ENSMUSG00000096617	Gm5559	91.3437	152.995	59.2987	36.8648	122.169	48.0817	2.53643	1.3428	0.00296431	0.040334
ENSMUSG00000023832	Acat2	4157.71	5508.94	2010.77	1812.99	4833.33	1911.88	2.5278	1.33788	2.62752e-14	6.73292e-12
ENSMUSG00000037071	Scd1	1.41795e+06	1.57607e+06	656297	538046	1.49701e+06	597172	2.50683	1.32586	2.25135e-18	1.25682e-15
ENSMUSG00000028359	Orm3	370.625	379.162	168.013	131.39	374.893	149.701	2.5028	1.32354	3.43069e-07	2.03898e-05
ENSMUSG00000035686	Thrsp	60090.5	66615	26509.2	24154.9	63352.8	25332.1	2.50087	1.32243	1.1789e-21	9.21373e-19
ENSMUSG00000026473	Glul	36696	28740.9	11804	14468.9	32718.5	13136.5	2.49071	1.31656	1.21955e-14	3.2926e-12
ENSMUSG00000049313	Sorl1	5945.74	7634.24	2989.19	2472.78	6789.99	2730.98	2.48605	1.31386	6.60894e-14	1.54186e-11
ENSMUSG00000031808	Slc27a1	37161.1	23931.6	12944.2	11646.4	30546.4	12295.3	2.4844	1.3129	2.98092e-11	4.08726e-09
ENSMUSG00000034981	Parm1	2706.71	3850.38	1397.11	1247.73	3278.55	1322.42	2.47884	1.30967	1.24637e-11	1.91182e-09
ENSMUSG00000032064	Dixdc1	676.154	705.108	349.503	208.9	690.631	279.202	2.47194	1.30564	4.42519e-07	2.56186e-05
ENSMUSG00000056413	Adap1	605.808	1075.4	350.401	329.892	840.605	340.147	2.47043	1.30476	9.59758e-07	5.12013e-05
ENSMUSG00000017386	Traf4	675.104	818.192	291.103	313.823	746.648	302.463	2.46843	1.30359	5.16725e-10	5.60898e-08
ENSMUSG00000030317	Timp4	1827.92	1854.79	714.28	778.886	1841.36	746.583	2.46661	1.30253	8.1058e-16	2.79401e-13
ENSMUSG00000058022	Adtrp	426.271	225.058	126.684	138.007	325.664	132.345	2.46239	1.30006	9.68596e-05	0.00259792
ENSMUSG00000002058	Unc119	1079.33	1435.72	482.476	543.519	1257.52	512.997	2.45123	1.2935	1.76342e-10	2.05701e-08
ENSMUSG00000025795	Rassf3	3243.23	5248.4	1772.67	1696.72	4245.81	1734.7	2.44736	1.29123	1.21431e-09	1.24058e-07
ENSMUSG00000022548	Apod	356.975	595.351	150.044	241.039	476.163	195.541	2.43568	1.28433	4.37827e-05	0.0013419
ENSMUSG00000025153	Fasn	645075	688728	329805	219887	666901	274846	2.42645	1.27885	9.36793e-12	1.48817e-09
ENSMUSG00000045917	Tmem268	440.97	761.65	224.616	273.177	601.31	248.897	2.41562	1.27239	6.13164e-06	0.000248945
ENSMUSG00000022474	Pmm1	2216.4	2086.5	920.028	869.63	2151.45	894.829	2.40425	1.26559	8.2224e-16	2.79401e-13
ENSMUSG00000033308	Dpyd	1734.48	1484.5	690.021	653.168	1609.49	671.595	2.3966	1.26099	3.55773e-13	7.03936e-11
ENSMUSG00000023078	Cxcl13	284.53	217.298	129.379	84.1273	250.914	106.753	2.34913	1.23213	0.000174962	0.00419453
ENSMUSG00000106951	5930430L01Rik	98.6932	155.213	45.8217	62.3865	126.953	54.1041	2.3467	1.23063	0.00350293	0.0460522
ENSMUSG00000039956	Mrap	4648.03	5247.29	2073.66	2186.36	4947.66	2130.01	2.32282	1.21588	2.00955e-16	8.26613e-14
ENSMUSG00000020593	Lpin1	9500.8	11206.3	4592.95	4369.89	10353.6	4481.42	2.31025	1.20805	3.0361e-16	1.21685e-13
ENSMUSG00000027952	Pmvk	1118.17	1505.56	619.043	523.669	1311.87	571.356	2.2953	1.19868	5.79994e-09	5.15107e-07
ENSMUSG00000029167	Ppargc1a	219.435	238.362	72.7757	127.609	228.899	100.192	2.28685	1.19336	0.000510973	0.00978768
ENSMUSG00000027656	Ccn5	193.187	526.614	165.318	149.35	359.9	157.334	2.28606	1.19286	0.00221777	0.0321876
ENSMUSG00000066705	Fxyd6	150.14	319.294	100.628	105.868	234.717	103.248	2.27198	1.18395	0.00178712	0.0268859
ENSMUSG00000064354	mt-Co2	4754.07	4144.17	1977.52	1946.27	4449.12	1961.9	2.26784	1.18132	3.11652e-15	9.36815e-13
ENSMUSG00000037573	Tob1	3096.24	2536.62	1345	1148.48	2816.43	1246.74	2.25897	1.17566	1.25317e-11	1.91182e-09
ENSMUSG00000020131	Pcsk4	277.181	136.365	92.5419	90.744	206.773	91.643	2.25781	1.17492	0.00217853	0.0317063
ENSMUSG00000031628	Casp3	684.553	883.603	363.878	331.783	784.078	347.831	2.25339	1.17209	4.47254e-08	3.2069e-06
ENSMUSG00000047094	Ofcc1	223.635	150.778	94.3388	71.839	187.206	83.0889	2.25291	1.17179	0.00103175	0.017416
ENSMUSG00000029001	Fbxo44	207.886	181.82	88.9481	84.1273	194.853	86.5377	2.25182	1.17109	0.000241798	0.00536868
ENSMUSG00000006494	Pdk1	3543.51	3723.99	1692.71	1542.65	3633.75	1617.68	2.24609	1.16742	3.73701e-15	1.08172e-12
ENSMUSG00000033065	Pfkm	611.058	1187.38	383.645	417.801	899.217	400.723	2.2435	1.16575	3.10155e-05	0.00101849
ENSMUSG00000041801	Phlda3	4801.32	7569.94	3004.47	2518.15	6185.63	2761.31	2.23992	1.16345	3.04402e-08	2.27661e-06
ENSMUSG00000041794	Myrip	279.281	221.732	102.425	121.937	250.507	112.181	2.23468	1.16007	0.000111031	0.00289255
ENSMUSG00000021474	Sfxn1	7416.69	6189.65	2690	3401.96	6803.17	3045.98	2.23369	1.15943	1.40517e-11	2.09183e-09
ENSMUSG00000021273	Fdft1	1696.68	1990.05	758.305	893.262	1843.36	825.783	2.23241	1.1586	6.70938e-11	8.38995e-09
ENSMUSG00000022490	Ppp1r1a	1942.37	1981.18	796.04	964.156	1961.77	880.098	2.22941	1.15666	1.09648e-11	1.71391e-09
ENSMUSG00000033610	Pank1	393.723	379.162	190.475	156.912	386.443	173.693	2.22404	1.15318	3.65715e-06	0.000160576
ENSMUSG00000016194	Hsd11b1	936.536	1090.92	479.78	432.925	1013.73	456.353	2.22076	1.15105	1.55068e-09	1.54386e-07
ENSMUSG00000026827	Gpd2	5860.7	7124.26	2884.97	2972.81	6492.48	2928.89	2.21664	1.14837	1.14493e-13	2.43701e-11
ENSMUSG00000028701	Lurap1	256.182	170.734	106.917	86.0178	213.458	96.4676	2.21288	1.14593	0.00072321	0.0129937
ENSMUSG00000032349	Elovl5	10308.2	5855.95	3939.77	3375.49	8082.07	3657.63	2.20969	1.14384	5.23417e-07	2.9751e-05
ENSMUSG00000049422	Chchd10	1970.71	1875.85	958.662	786.448	1923.28	872.555	2.20385	1.14003	3.64004e-11	4.7899e-09
ENSMUSG00000027312	Atrn	3621.2	4217.35	1866.11	1692.94	3919.27	1779.53	2.2022	1.13894	4.03803e-13	7.8898e-11
ENSMUSG00000031604	Msmo1	759.098	1035.49	456.42	358.25	897.294	407.335	2.20178	1.13867	5.38851e-07	3.03351e-05
ENSMUSG00000055866	Per2	278.231	362.532	181.49	109.649	320.382	145.57	2.19852	1.13653	0.000292848	0.00623638
ENSMUSG00000020532	Acaca	99128.9	110328	58653.6	36745.7	104729	47699.6	2.19557	1.1346	1.89182e-08	1.47855e-06
ENSMUSG00000038949	Cnst	2091.46	2337.06	1097.03	929.181	2214.26	1013.1	2.1852	1.12776	2.35572e-11	3.31732e-09
ENSMUSG00000030096	Slc6a6	2457.88	2555.46	1158.12	1139.97	2506.67	1149.05	2.18144	1.12528	7.64425e-14	1.70696e-11
ENSMUSG00000023019	Gpd1	23535.2	22921.6	11318	9981.85	23228.4	10649.9	2.18106	1.12503	4.18181e-16	1.59429e-13
ENSMUSG00000010651	Acaa1b	2916.7	1501.13	937.998	1116.34	2208.91	1027.17	2.1509	1.10494	2.17069e-05	0.000759063
ENSMUSG00000028957	Per3	476.667	616.416	245.281	263.725	546.541	254.503	2.14716	1.10243	2.08385e-06	9.80847e-05
ENSMUSG00000023206	Il15ra	758.048	694.022	310.869	369.593	726.035	340.231	2.13474	1.09406	1.083e-07	7.17303e-06
ENSMUSG00000018796	Acsl1	52918.5	41351.9	20817.4	23473.4	47135.2	22145.4	2.12846	1.08981	1.60888e-11	2.37249e-09
ENSMUSG00000022899	Slc15a2	259.332	250.557	105.12	135.171	254.945	120.146	2.12329	1.0863	0.000192408	0.00450597
ENSMUSG00000010914	Pdhx	1498.25	1680.73	718.772	779.832	1589.49	749.302	2.12132	1.08496	1.50674e-10	1.77082e-08
ENSMUSG00000100862	Gm10925	2498.83	3019.99	1036.83	1566.28	2759.41	1301.55	2.12035	1.0843	2.46502e-07	1.5051e-05
ENSMUSG00000111942	Gm5182	12748.2	13827.2	7948.72	4590.14	13287.7	6269.43	2.11935	1.08362	7.81138e-07	4.2249e-05
ENSMUSG00000021327	Zkscan3	2255.25	2414.66	1116.79	1087.04	2334.95	1101.92	2.11886	1.08329	1.72766e-12	3.06875e-10
ENSMUSG00000031349	Nsdhl	1653.64	2271.65	957.764	896.097	1962.64	926.931	2.11697	1.082	1.85808e-08	1.45948e-06
ENSMUSG00000032883	Acsl3	299.229	532.157	213.835	181.488	415.693	197.661	2.10164	1.07152	0.000404862	0.00816568
ENSMUSG00000061740	Cyp2d22	1359.66	1184.05	539.079	672.073	1271.85	605.576	2.10093	1.07103	2.26926e-08	1.73877e-06
ENSMUSG00000059027	9630013D21Rik	257.232	521.071	171.607	201.338	389.152	186.473	2.08626	1.06092	0.00129946	0.0208113
ENSMUSG00000024665	Fads2	1036.28	1786.05	738.538	621.975	1411.17	680.257	2.07386	1.05232	1.92934e-05	0.000683843
ENSMUSG00000000168	Dlat	5084.8	5525.57	2518.4	2598.49	5305.18	2558.45	2.07358	1.05212	1.21817e-13	2.53883e-11
ENSMUSG00000045094	Arhgef37	201.586	305.99	106.019	138.952	253.788	122.485	2.072	1.05102	0.00116379	0.019143
ENSMUSG00000025260	Hsd17b10	2872.6	1704.01	1092.53	1119.18	2288.31	1105.86	2.06956	1.04932	3.86601e-06	0.000167842
ENSMUSG00000020264	Slc36a2	8644.06	7109.84	3831.06	3798.96	7876.95	3815.01	2.06479	1.04599	7.67791e-12	1.25014e-09
ENSMUSG00000074604	Mgst2	783.246	720.63	297.392	431.979	751.938	364.686	2.06296	1.04471	5.49723e-06	0.00022732
ENSMUSG00000101111	Gm28437	1312.41	1853.68	611.855	925.4	1583.05	768.628	2.0598	1.0425	1.04587e-05	0.000402659
ENSMUSG00000059146	Ntrk3	248.833	380.271	163.521	141.788	314.552	152.654	2.05906	1.04199	0.000456566	0.00894309
ENSMUSG00000029103	Lrpap1	6246.02	6677.47	3397.1	2889.63	6461.74	3143.36	2.05554	1.03951	5.27726e-12	8.7754e-10
ENSMUSG00000022707	Gbe1	4616.53	5358.16	2583.99	2269.55	4987.35	2426.77	2.05496	1.03911	3.22661e-11	4.34785e-09
ENSMUSG00000049580	Tsku	255.132	334.816	146.45	141.788	294.974	144.119	2.04584	1.0327	0.000218596	0.00498086
ENSMUSG00000031958	Ldhd	1590.64	1230.61	714.28	665.456	1410.63	689.868	2.04496	1.03207	5.60561e-08	3.89428e-06
ENSMUSG00000054434	Tmem120b	2789.66	2893.61	1607.35	1194.8	2841.63	1401.08	2.02784	1.01994	1.44424e-08	1.15178e-06
ENSMUSG00000110613	Lncbate1	171.138	208.428	88.9481	98.3061	189.783	93.6271	2.02685	1.01924	0.00154899	0.0240918
ENSMUSG00000026568	Mpc2	5303.19	6378.13	2955.95	2812.12	5840.66	2884.04	2.02505	1.01796	4.11855e-11	5.32042e-09
ENSMUSG00000018169	Mfng	2319.29	1649.69	964.053	996.294	1984.49	980.174	2.02495	1.01789	1.79471e-07	1.13117e-05
ENSMUSG00000024785	Rcl1	779.046	829.278	414.192	380.936	804.162	397.564	2.02231	1.01601	1.1699e-07	7.65137e-06
ENSMUSG00000024892	Pcx	81920.6	75883.4	45230.5	32830.4	78902	39030.5	2.02154	1.01545	3.51167e-09	3.20999e-07
ENSMUSG00000034926	Dhcr24	665.654	1176.29	445.639	466.008	920.972	455.824	2.01996	1.01433	8.75671e-05	0.00238045
ENSMUSG00000027222	Pex16	2592.27	2587.61	1289.3	1277.03	2589.94	1283.17	2.01839	1.0132	8.49712e-12	1.36926e-09
ENSMUSG00000063931	Pepd	2966.05	2697.37	1461.8	1345.09	2831.71	1403.45	2.01765	1.01267	4.99468e-11	6.34731e-09
ENSMUSG00000040016	Ptger3	6038.14	7298.32	3606.44	3012.51	6668.23	3309.48	2.01473	1.01058	9.21511e-10	9.60276e-08
ENSMUSG00000025792	Slc25a10	10173.8	13131	6209.29	5359.57	11652.4	5784.43	2.01435	1.01031	2.01616e-09	1.94535e-07
ENSMUSG00000056486	Chn1	289.78	435.704	150.942	209.846	362.742	180.394	2.01102	1.00793	0.000684553	0.0124711
ENSMUSG00000036745	Ttll7	184.787	167.408	78.1665	97.3608	176.098	87.7636	2.00789	1.00568	0.00243389	0.0345855
ENSMUSG00000062609	Kcnj15	666.704	885.82	374.66	399.841	776.262	387.25	2.00423	1.00305	3.26333e-06	0.000144502
ENSMUSG00000076435	Acsf2	1542.34	1886.94	848.151	871.521	1714.64	859.836	1.99396	0.995638	1.25524e-08	1.02726e-06
ENSMUSG00000033917	Gde1	3548.76	2967.89	1570.52	1699.56	3258.32	1635.04	1.99303	0.994962	6.79647e-10	7.27641e-08
ENSMUSG00000048040	Arxes2	1939.22	1284.94	766.391	858.287	1612.08	812.339	1.98497	0.989114	4.21011e-06	0.000179511
ENSMUSG00000058258	Idi1	576.41	982.274	411.497	377.155	779.342	394.326	1.97562	0.982306	0.000145435	0.00364309
ENSMUSG00000034285	Nipsnap1	300.279	342.576	157.231	168.255	321.428	162.743	1.97497	0.98183	0.00014299	0.00359916
ENSMUSG00000035105	Egln3	528.114	606.438	265.047	310.042	567.276	287.545	1.97304	0.980419	8.39837e-06	0.00032901
ENSMUSG00000026853	Crat	12244.3	8635.36	5004.45	5580.76	10439.8	5292.61	1.97262	0.980111	8.13036e-08	5.50154e-06
ENSMUSG00000017978	Cadps2	1064.63	773.845	486.968	446.158	919.236	466.563	1.9705	0.978558	5.02173e-06	0.000210442
ENSMUSG00000024747	Aldh1a7	4307.85	5704.06	2468.98	2613.62	5005.96	2541.3	1.96976	0.978022	1.2921e-08	1.05192e-06
ENSMUSG00000057722	Lepr	486.117	262.753	231.804	149.35	374.435	190.577	1.96466	0.974281	0.00372448	0.047955
ENSMUSG00000037685	Atp8a1	1144.42	1171.85	603.769	575.658	1158.14	589.713	1.96373	0.973597	1.58928e-08	1.25465e-06
ENSMUSG00000042616	Oscp1	722.35	791.584	477.085	293.973	756.967	385.529	1.96239	0.972611	8.80067e-05	0.00238825
ENSMUSG00000035735	Dagla	384.274	491.137	255.164	190.941	437.705	223.052	1.96094	0.971543	0.000177107	0.0042265
ENSMUSG00000027339	Rassf2	2599.62	2563.22	1573.21	1061.52	2581.42	1317.36	1.95919	0.970258	1.05059e-06	5.45576e-05
ENSMUSG00000026571	Dcaf6	1293.51	1823.75	690.021	903.659	1558.63	796.84	1.95607	0.967957	8.26792e-06	0.000325531
ENSMUSG00000028636	Ppcs	374.824	568.743	248.875	234.422	471.784	241.648	1.95141	0.96452	0.000237188	0.00531122
ENSMUSG00000050556	Kcnb1	1505.6	2712.89	1177.89	985.896	2109.25	1081.89	1.94919	0.962877	9.24458e-05	0.00249141
ENSMUSG00000085211	B430219N15Rik	233.084	249.449	120.394	128.554	241.266	124.474	1.93837	0.954841	0.000760755	0.0135591
ENSMUSG00000026202	Tuba4a	427.321	709.543	283.915	302.48	568.432	293.198	1.93813	0.954669	0.000353335	0.00731229
ENSMUSG00000029482	Aacs	11791.7	11765.1	7141.9	5049.53	11778.4	6095.71	1.93216	0.950217	9.68306e-08	6.4682e-06
ENSMUSG00000031442	Mcf2l	928.136	1056.55	493.257	534.067	992.345	513.662	1.93188	0.950006	3.10182e-07	1.86479e-05
ENSMUSG00000031767	Nudt7	2043.16	2490.05	1192.26	1172.11	2266.61	1182.19	1.91709	0.938919	2.12152e-08	1.63357e-06
ENSMUSG00000026672	Optn	771.697	838.148	377.355	465.063	804.922	421.209	1.91138	0.934614	3.87961e-06	0.000167842
ENSMUSG00000030972	Acsm5	596.359	422.4	281.22	254.272	509.379	267.746	1.90285	0.92816	0.000170531	0.00411989
ENSMUSG00000042807	Hecw2	261.432	281.6	164.419	120.992	271.516	142.706	1.90127	0.926964	0.00124538	0.0201101
ENSMUSG00000028518	Prkaa2	446.219	701.782	285.712	319.495	574.001	302.603	1.89644	0.923293	0.000348665	0.00726465
ENSMUSG00000022747	St3gal6	1708.23	890.255	680.138	694.759	1299.24	687.449	1.89038	0.918674	0.000479191	0.00930464
ENSMUSG00000025488	Cox8b	557.512	589.808	206.647	400.786	573.66	303.717	1.88986	0.918279	0.00160163	0.0246167
ENSMUSG00000026854	Usp20	394.773	576.504	294.697	219.298	485.638	256.997	1.88832	0.917105	0.000646992	0.0118978
ENSMUSG00000021699	Pde4d	437.82	486.702	179.693	311.933	462.261	245.813	1.8816	0.91196	0.00129358	0.0207384
ENSMUSG00000030695	Aldoa	36065	43253.3	23283.7	18873.8	39659.2	21078.8	1.88145	0.911842	2.01262e-08	1.56514e-06
ENSMUSG00000022265	Ank	1727.13	2337.06	1014.37	1148.48	2032.09	1081.42	1.879	0.909965	1.90047e-06	9.08449e-05
ENSMUSG00000102070	Gm28661	2486.23	4124.22	1556.14	1964.23	3305.22	1760.19	1.87772	0.908981	6.95684e-05	0.00195615
ENSMUSG00000038195	Rilp	241.483	208.428	116.8	123.828	224.956	120.314	1.87043	0.903374	0.00206681	0.0303346
ENSMUSG00000028093	Acp6	725.5	615.307	349.503	367.702	670.404	358.603	1.86998	0.903019	1.14453e-05	0.000434227
ENSMUSG00000028494	Plin2	7089.11	10484.6	4599.24	4817	8786.86	4708.12	1.86626	0.900152	1.89429e-06	9.08269e-05
ENSMUSG00000018566	Slc2a4	5356.73	7461.29	3494.13	3397.23	6409.01	3445.68	1.85991	0.895232	5.39516e-07	3.03351e-05
ENSMUSG00000083563	Gm13340	446.219	539.918	272.235	259.944	493.069	266.089	1.85243	0.889421	8.64873e-05	0.00235931
ENSMUSG00000031373	Car5b	13939.9	11588.8	7044.87	6739.64	12764.4	6892.25	1.85201	0.889093	2.5835e-09	2.40373e-07
ENSMUSG00000026189	Pecr	699.252	551.005	333.331	342.181	625.128	337.756	1.85137	0.88859	4.3558e-05	0.00133914
ENSMUSG00000031299	Pdha1	12226.4	12522.3	7433.9	5938.06	12374.4	6685.98	1.85073	0.888091	1.08548e-08	9.02503e-07
ENSMUSG00000036473	Tbc1d24	565.911	824.844	389.934	362.031	695.377	375.982	1.84877	0.886568	0.000151543	0.00377192
ENSMUSG00000027901	Dennd2d	405.272	400.227	205.749	230.641	402.749	218.195	1.84627	0.884617	0.000157114	0.00387357
ENSMUSG00000045038	Prkce	1466.75	1560.99	747.523	896.097	1513.87	821.81	1.84236	0.881555	4.72897e-07	2.72762e-05
ENSMUSG00000038007	Acer2	922.887	608.655	343.214	488.695	765.771	415.954	1.84201	0.881283	0.000650308	0.0119447
ENSMUSG00000030688	Stard10	243.583	254.992	148.247	122.883	249.288	135.565	1.838	0.878139	0.00191589	0.0284129
ENSMUSG00000035376	Hacd2	4468.49	4483.43	2143.74	2727.99	4475.96	2435.87	1.83768	0.877889	8.87803e-08	5.98157e-06
ENSMUSG00000040111	Gramd1b	528.114	541.027	245.281	337.454	534.57	291.368	1.8355	0.876176	0.000196637	0.00457492
ENSMUSG00000047205	Dusp18	351.726	472.29	219.226	229.696	412.008	224.461	1.83504	0.875812	0.000486473	0.00939933
ENSMUSG00000030747	Dgat2	35867.6	58202.5	25960.3	25359.2	47035.1	25659.7	1.83302	0.874219	1.70183e-05	0.000608725
ENSMUSG00000025876	Unc5a	1524.5	2410.23	1113.2	1033.16	1967.36	1073.18	1.83287	0.874106	5.83563e-05	0.00170181
ENSMUSG00000050663	Trhde	339.127	414.639	215.632	195.667	376.883	205.649	1.83182	0.873279	0.000440308	0.00868997
ENSMUSG00000032911	Cspg4	1116.07	1894.7	890.379	755.255	1505.39	822.817	1.82906	0.871106	0.00028895	0.00617018
ENSMUSG00000015970	Chdh	1410.05	794.91	609.159	598.344	1102.48	603.751	1.82648	0.869066	0.000559491	0.0104581
ENSMUSG00000063428	Ddo	492.416	638.589	283.915	336.509	565.502	310.212	1.82291	0.866245	0.000189027	0.00444612
ENSMUSG00000022555	Dgat1	7013.52	6354.85	3494.13	3841.5	6684.18	3667.81	1.82248	0.865904	2.20346e-09	2.11303e-07
ENSMUSG00000032294	Pkm	9896.62	14536.8	8082.59	5341.61	12216.7	6712.1	1.82001	0.863946	9.93064e-05	0.00265343
ENSMUSG00000039826	Trub2	1026.83	1474.52	669.357	706.102	1250.67	687.729	1.81827	0.862563	3.7364e-05	0.00117749
ENSMUSG00000058586	Serhl	271.931	252.775	154.536	134.226	262.353	144.381	1.81675	0.861359	0.00173349	0.0261799
ENSMUSG00000029036	Atad3a	1354.41	1400.24	692.717	824.258	1377.32	758.488	1.81616	0.860891	9.49711e-07	5.08388e-05
ENSMUSG00000040181	Fmo1	7509.08	6469.04	3445.61	4252.68	6989.06	3849.15	1.81588	0.860665	1.49041e-07	9.50882e-06
ENSMUSG00000039114	Nrn1	577.46	627.502	381.848	281.685	602.481	331.766	1.81507	0.860027	0.000161403	0.00395437
ENSMUSG00000046027	Stard5	652.005	757.215	408.802	367.702	704.61	388.252	1.81425	0.859375	2.41101e-05	0.000828275
ENSMUSG00000027257	Pacsin3	321.278	412.422	224.616	179.598	366.85	202.107	1.81389	0.859086	0.00111301	0.0184445
ENSMUSG00000048058	Ldlrad3	602.659	555.439	316.26	322.33	579.049	319.295	1.81377	0.858992	3.20968e-05	0.00104959
ENSMUSG00000019763	Rmnd1	511.315	788.258	358.488	359.195	649.786	358.841	1.81018	0.856133	0.000482014	0.00934785
ENSMUSG00000001755	Coasy	2048.41	2161.89	1103.32	1223.15	2105.15	1163.23	1.80983	0.855858	5.99088e-08	4.12526e-06
ENSMUSG00000055407	Map6	616.308	921.297	518.414	331.783	768.802	425.099	1.8075	0.853996	0.00144495	0.0227912
ENSMUSG00000027510	Rbm38	332.827	487.811	268.641	185.269	410.319	226.955	1.80645	0.853158	0.00293971	0.0400965
ENSMUSG00000027999	Pla2g12a	1175.92	1162.99	615.449	681.526	1169.45	648.487	1.8036	0.850877	9.33489e-07	5.01422e-05
ENSMUSG00000029401	Rilpl2	472.468	675.175	315.361	321.385	573.821	318.373	1.80179	0.849432	0.000372736	0.00758625
ENSMUSG00000020538	Srebf1	13061.1	17143.2	9743.86	7020.38	15102.2	8382.12	1.80164	0.849311	1.11654e-05	0.000425675
ENSMUSG00000044986	Tst	1530.79	936.819	584.901	786.448	1233.81	685.675	1.80006	0.848043	0.000642405	0.0118553
ENSMUSG00000055239	Kcmf1	1937.12	1702.9	946.982	1075.7	1820.01	1011.34	1.79993	0.847944	5.22634e-07	2.9751e-05
ENSMUSG00000065947	mt-Nd4l	537.563	574.286	376.457	241.039	555.925	308.748	1.79952	0.847613	0.000820694	0.0143815
ENSMUSG00000041696	Rasl12	618.408	1011.1	441.146	465.063	814.753	453.105	1.7977	0.84615	0.000604886	0.0112292
ENSMUSG00000082691	Dynlt1-ps1	250.933	286.035	138.364	160.693	268.484	149.528	1.79574	0.844575	0.00214926	0.0313388
ENSMUSG00000024955	Esrra	903.988	962.318	522.907	517.052	933.153	519.979	1.79445	0.843543	2.84727e-06	0.00012789
ENSMUSG00000026869	Psmd5	1031.03	1313.76	672.95	636.154	1172.4	654.552	1.79073	0.840547	1.10583e-05	0.000423139
ENSMUSG00000028671	Gale	729.7	1022.19	504.039	474.516	875.943	489.277	1.78971	0.839729	0.000106688	0.00281221
ENSMUSG00000034449	Dhrs11	254.083	273.839	142.856	152.185	263.961	147.521	1.78934	0.83943	0.0019232	0.0284405
ENSMUSG00000003526	Prodh	768.547	547.679	351.3	384.717	658.113	368.008	1.78904	0.839187	0.000269397	0.0058002
ENSMUSG00000050379	Septin6	376.924	403.553	226.413	209.846	390.238	218.129	1.78858	0.838812	0.000358064	0.00735466
ENSMUSG00000027195	Hsd17b12	7802.01	9085.48	4578.58	4876.55	8443.75	4727.56	1.78605	0.836771	1.30229e-08	1.05472e-06
ENSMUSG00000031708	Tecr	6520.05	7711.85	4309.94	3682.7	7115.95	3996.32	1.78051	0.832289	1.59022e-07	1.00634e-05
ENSMUSG00000030087	Klf15	1410.05	1162.99	619.043	835.601	1286.52	727.322	1.76945	0.823301	6.19342e-05	0.00178945
ENSMUSG00000031636	Pdlim3	884.039	910.211	547.165	466.954	897.125	507.06	1.76885	0.822811	1.32469e-05	0.000495363
ENSMUSG00000002550	Uck1	4810.77	4237.3	2630.71	2488.84	4524.04	2559.78	1.76738	0.821615	3.1051e-08	2.31123e-06
ENSMUSG00000029162	Khk	366.425	257.209	186.881	166.364	311.817	176.622	1.76588	0.820386	0.00355649	0.0464812
ENSMUSG00000019883	Echdc1	2215.35	1896.92	1269.53	1063.41	2056.13	1166.47	1.76262	0.817722	2.67447e-06	0.000121525
ENSMUSG00000038068	Rnf144b	1573.84	1125.29	863.425	671.128	1349.57	767.276	1.75889	0.814668	0.000165769	0.00404864
ENSMUSG00000042249	Grk3	547.012	633.045	329.737	341.235	590.029	335.486	1.75852	0.814359	0.000100879	0.00269084
ENSMUSG00000025503	Taldo1	10482.5	11431.4	6541.73	5933.34	10956.9	6237.53	1.75656	0.812753	8.00882e-09	6.95477e-07
ENSMUSG00000039349	C130074G19Rik	4609.18	4130.87	2767.27	2210.94	4370.03	2489.11	1.75557	0.81194	9.79569e-07	5.19039e-05
ENSMUSG00000021748	Pdhb	9446.2	12483.5	6147.3	6346.41	10964.9	6246.86	1.75522	0.811651	9.9268e-07	5.23825e-05
ENSMUSG00000017801	Mlx	459.868	837.039	352.198	387.553	648.454	369.876	1.75267	0.809557	0.00341293	0.0451473
ENSMUSG00000048371	Pdp2	709.751	830.387	448.334	431.034	770.069	439.684	1.75103	0.808203	3.81709e-05	0.0012005
ENSMUSG00000021752	Kctd6	495.566	371.401	248.875	246.71	433.484	247.793	1.74996	0.807321	0.000973208	0.0166072
ENSMUSG00000050896	Rtn4rl2	272.981	309.316	184.185	148.404	291.149	166.295	1.74975	0.807145	0.00288564	0.0395315
ENSMUSG00000046312	Myorg	1089.83	1329.28	713.381	670.183	1209.55	691.782	1.74809	0.805778	1.17767e-05	0.000445716
ENSMUSG00000032942	Ucp3	758.048	1083.16	551.658	501.928	920.605	526.793	1.74698	0.804859	0.000237512	0.00531122
ENSMUSG00000026489	Coq8a	2096.71	1798.25	1124.88	1105	1947.48	1114.94	1.74685	0.804752	9.09493e-07	4.90217e-05
ENSMUSG00000032279	Idh3a	4375.05	4631.99	2343.2	2814.01	4503.52	2578.6	1.74659	0.804541	2.45238e-07	1.50326e-05
ENSMUSG00000060376	Bckdha	1624.24	1359.22	904.754	803.463	1491.73	854.109	1.74655	0.804509	6.50597e-06	0.000261426
ENSMUSG00000045534	Kcna5	376.924	385.814	189.576	247.656	381.369	218.616	1.74523	0.803414	0.00130218	0.0208336
ENSMUSG00000022358	Fbxo32	895.588	695.13	494.156	417.801	795.359	455.978	1.74433	0.802674	0.000169747	0.0041073
ENSMUSG00000021930	Spryd7	590.059	722.847	379.152	375.264	656.453	377.208	1.73988	0.798991	0.000129989	0.00332547
ENSMUSG00000022477	Aco2	11365.5	11740.7	6884.94	6399.35	11553.1	6642.14	1.73933	0.798531	3.28253e-09	3.01819e-07
ENSMUSG00000022437	Samm50	1891.97	1725.08	1054.8	1033.16	1808.52	1043.98	1.73241	0.792783	6.43207e-07	3.56061e-05
ENSMUSG00000033863	Klf9	2928.25	2563.22	1416.88	1754.38	2745.74	1585.63	1.73191	0.792367	3.93732e-06	0.000169543
ENSMUSG00000028420	Tmem38b	583.76	797.127	366.574	431.034	690.444	398.804	1.73115	0.791727	0.000495269	0.00953393
ENSMUSG00000025464	Paox	683.503	711.76	385.442	420.636	697.632	403.039	1.73108	0.791673	5.02569e-05	0.0015048
ENSMUSG00000020321	Mdh1	15201.9	13820.6	8159.86	8635.81	14511.2	8397.83	1.72801	0.789109	9.01797e-09	7.61946e-07
ENSMUSG00000025934	Gsta3	5949.94	3789.4	2928.1	2710.98	4869.67	2819.54	1.7272	0.788439	0.000118452	0.00305531
ENSMUSG00000020190	Mknk2	13913.6	13065.6	8800.47	6842.67	13489.6	7821.57	1.72463	0.786283	1.03896e-06	5.41333e-05
ENSMUSG00000030826	Bcat2	5263.29	3476.76	2218.31	2850.88	4370.02	2534.59	1.72436	0.786057	0.000196033	0.00457492
ENSMUSG00000019437	Tlcd1	1144.42	1386.93	741.234	727.843	1265.68	734.538	1.72281	0.784766	1.33783e-05	0.000499083
ENSMUSG00000025937	Lactb2	1604.29	2450.14	1177.89	1176.84	2027.22	1177.36	1.72158	0.78373	0.000171557	0.00412682
ENSMUSG00000075296	Aldh3b2	1267.26	814.866	552.556	658.84	1041.06	605.698	1.71941	0.781912	0.00083179	0.0145596
ENSMUSG00000049892	Rasd1	2374.94	2023.31	1581.3	977.389	2199.12	1279.34	1.71871	0.781328	0.000449325	0.00883447
ENSMUSG00000030717	Nupr1	1019.48	856.995	628.027	466.954	938.237	547.49	1.71343	0.776889	0.000258514	0.00562007
ENSMUSG00000066440	Zfyve26	1443.65	1019.97	729.554	708.938	1231.81	719.246	1.71295	0.776483	0.000161095	0.00395301
ENSMUSG00000019194	Scn1b	1065.68	658.545	522.008	484.914	862.111	503.461	1.71276	0.776322	0.00136134	0.0216864
ENSMUSG00000028737	Aldh4a1	1860.47	1666.32	1030.54	1029.38	1763.39	1029.96	1.71223	0.775875	1.48073e-06	7.39464e-05
ENSMUSG00000028975	Pex14	807.395	730.608	478.882	419.691	769.001	449.287	1.71147	0.775238	7.57417e-05	0.00209543
ENSMUSG00000033096	Apmap	4604.98	3211.79	2053.89	2520.04	3908.39	2286.96	1.7092	0.773321	9.48492e-05	0.00255179
ENSMUSG00000034780	B3galt1	344.376	462.312	216.53	256.163	403.344	236.346	1.70643	0.770982	0.00256633	0.0358484
ENSMUSG00000049940	Pgrmc2	3589.7	2834.85	1863.42	1902.79	3212.27	1883.1	1.70599	0.770613	4.09682e-06	0.000175927
ENSMUSG00000021069	Pygl	8429.87	9989.04	5908.31	4896.4	9209.45	5402.35	1.70462	0.76945	1.8656e-06	9.05627e-05
ENSMUSG00000051984	Sec31b	303.429	278.274	159.028	182.433	290.852	170.731	1.70427	0.769153	0.00338893	0.0449376
ENSMUSG00000045441	Gprin3	491.366	471.181	291.103	274.123	481.274	282.613	1.70286	0.767959	0.000387542	0.0078569
ENSMUSG00000020988	L2hgdh	513.415	503.332	308.174	289.247	508.373	298.71	1.70175	0.76702	0.000303799	0.00642582
ENSMUSG00000021226	Acot2	552.262	542.135	297.392	345.962	547.199	321.677	1.70154	0.766843	0.000313968	0.00661407
ENSMUSG00000053838	Nudcd3	2152.35	2063.22	1317.15	1162.66	2107.79	1239.9	1.69984	0.765396	1.46619e-06	7.36912e-05
ENSMUSG00000025732	Mcrip2	1087.73	828.17	540.876	588.891	957.948	564.884	1.69634	0.762426	0.000173158	0.00415765
ENSMUSG00000032540	Abhd5	3703.1	3379.2	1982.01	2202.43	3541.15	2092.22	1.69268	0.759306	5.10096e-07	2.92062e-05
ENSMUSG00000028862	Map3k6	875.64	682.935	487.867	433.87	779.288	460.868	1.69106	0.757924	0.000296491	0.00630537
ENSMUSG00000021957	Tkt	51362.5	66374.4	42525.3	27181.6	58868.4	34853.4	1.68901	0.756179	0.0003069	0.0064739
ENSMUSG00000033400	Agl	1574.89	2332.62	1134.76	1189.13	1953.76	1161.94	1.68125	0.749533	0.000233785	0.00526314
ENSMUSG00000024533	Spire1	1078.28	1359.22	744.828	705.157	1218.75	724.992	1.68068	0.749047	6.46146e-05	0.00185027
ENSMUSG00000037493	Cib2	2240.55	2062.11	1231.8	1332.8	2151.33	1282.3	1.67789	0.746651	1.88509e-06	9.08222e-05
ENSMUSG00000066154	Mup3	314.978	317.077	199.459	177.707	316.028	188.583	1.6754	0.744503	0.00304548	0.0411518
ENSMUSG00000031924	Cyb5b	11843.2	15123.2	7810.36	8285.12	13483.2	8047.74	1.67538	0.744488	3.10952e-06	0.000138082
ENSMUSG00000043445	Pgp	1147.57	1242.81	725.061	702.321	1195.19	713.691	1.67448	0.743712	1.29668e-05	0.000486053
ENSMUSG00000032602	Slc25a20	1828.97	1417.98	878.699	1061.52	1623.48	970.108	1.67393	0.743238	0.000114299	0.00296287
ENSMUSG00000035948	Acss3	2916.7	1682.95	1465.4	1288.38	2299.82	1376.89	1.67046	0.740242	0.00155283	0.0241134
ENSMUSG00000025150	Cbr2	1591.69	1646.36	926.318	1016.14	1619.03	971.231	1.66709	0.737331	5.25354e-06	0.000218399
ENSMUSG00000005373	Mlxipl	4022.27	5583.22	2974.82	2786.6	4802.75	2880.71	1.66708	0.737319	4.49998e-05	0.00136847
ENSMUSG00000028961	Pgd	14098.4	19116.6	11177.8	8871.18	16607.5	10024.5	1.65664	0.728262	7.78945e-05	0.00213984
ENSMUSG00000027637	Rab5if	1087.73	881.386	665.763	525.559	984.555	595.661	1.65276	0.724881	0.000438415	0.00867452
ENSMUSG00000005683	Cs	13137.7	15109.9	8522.84	8570.59	14123.8	8546.71	1.65252	0.72467	2.80536e-07	1.69963e-05
ENSMUSG00000003531	Dgcr6	1150.72	975.622	677.443	610.632	1063.17	644.037	1.65084	0.723196	9.70625e-05	0.00259792
ENSMUSG00000028906	Epb41	1822.67	1386.93	983.819	964.156	1604.8	973.987	1.64789	0.72062	0.000103085	0.00274034
ENSMUSG00000050144	Slc25a44	1965.46	2383.62	1405.2	1237.33	2174.54	1321.27	1.64552	0.718545	2.95608e-05	0.00097895
ENSMUSG00000013701	Timm23	1255.71	1131.94	749.32	706.102	1193.83	727.711	1.64056	0.714193	3.65117e-05	0.00115529
ENSMUSG00000020307	Cdc34	1112.92	1299.35	741.234	729.733	1206.14	735.484	1.63969	0.713421	5.26721e-05	0.00156516
ENSMUSG00000052040	Klf13	1693.53	2035.5	1185.97	1088.93	1864.52	1137.45	1.63893	0.712758	2.99825e-05	0.000988727
ENSMUSG00000039512	Uhrf1bp1	919.737	1153.01	632.519	634.263	1036.37	633.391	1.63593	0.710111	0.000196683	0.00457492
ENSMUSG00000025137	Pcyt2	1359.66	1812.66	997.296	943.36	1586.16	970.328	1.63434	0.708712	0.000176987	0.0042265
ENSMUSG00000000088	Cox5a	1668.34	1862.55	1155.43	1005.75	1765.44	1080.59	1.63349	0.70796	2.55458e-05	0.000866174
ENSMUSG00000010663	Fads1	3650.6	4587.64	2645.08	2403.77	4119.12	2524.43	1.63155	0.706243	2.09985e-05	0.000737591
ENSMUSG00000059534	Uqcr10	2839	2512.23	1583.1	1699.56	2675.62	1641.33	1.63032	0.705153	5.69108e-06	0.000234098
ENSMUSG00000020744	Slc25a19	2164.95	2835.95	1553.45	1519.02	2500.45	1536.23	1.62746	0.702624	6.8161e-05	0.00192663
ENSMUSG00000032536	Trak1	3600.2	4737.31	2723.25	2401.88	4168.76	2562.56	1.62662	0.701879	6.4631e-05	0.00185027
ENSMUSG00000035772	Mrps2	756.998	773.845	470.796	470.735	765.422	470.765	1.62587	0.701209	0.00016626	0.00405431
ENSMUSG00000030409	Dmpk	2728.76	4267.24	2269.52	2033.23	3498	2151.38	1.62574	0.701099	0.000752416	0.0134565
ENSMUSG00000029455	Aldh2	26292.3	19165.4	14984.6	13067.1	22728.9	14025.9	1.6205	0.696443	7.71073e-05	0.00212604
ENSMUSG00000030246	Ldhb	965.934	1388.04	681.037	772.27	1176.99	726.653	1.61955	0.695595	0.00106968	0.0179017
ENSMUSG00000064120	Mocs1	1341.81	1017.75	680.138	780.777	1179.78	730.458	1.6156	0.692071	0.00051356	0.00981351
ENSMUSG00000004270	Lpcat3	2288.84	2678.53	1548.06	1528.47	2483.68	1538.26	1.61447	0.691057	1.34313e-05	0.000499866
ENSMUSG00000028416	Bag1	4726.78	4983.43	2921.81	3108.93	4855.1	3015.37	1.61013	0.687179	1.10137e-06	5.64444e-05
ENSMUSG00000018770	Atp5g3	6211.37	6429.13	4173.37	3697.82	6320.25	3935.6	1.60585	0.683335	1.86223e-06	9.05627e-05
ENSMUSG00000048755	Mcat	719.201	713.978	461.811	432.925	716.589	447.368	1.60165	0.679559	0.000360382	0.00738287
ENSMUSG00000028127	Abcd3	2656.32	2939.06	1682.83	1817.72	2797.69	1750.27	1.59843	0.676654	9.51253e-06	0.000368046
ENSMUSG00000079508	Apoo	389.523	425.726	257.86	252.382	407.625	255.121	1.5975	0.675815	0.00296487	0.040334
ENSMUSG00000039105	Atp6v1g1	1040.48	1325.96	732.249	751.474	1183.22	741.862	1.59469	0.673273	0.000356936	0.00734114
ENSMUSG00000022551	Cyc1	4334.1	4770.57	2921.81	2790.38	4552.34	2856.09	1.59382	0.672491	3.05136e-06	0.000135885
ENSMUSG00000019528	Gyg	2354.99	2232.84	1298.28	1581.4	2293.92	1439.84	1.5934	0.67211	5.35056e-05	0.00157807
ENSMUSG00000004056	Akt2	6233.42	6875.92	3887.66	4341.54	6554.67	4114.6	1.59304	0.671785	4.17038e-06	0.000178595
ENSMUSG00000041235	Chd7	753.848	803.779	491.46	488.695	778.814	490.077	1.58903	0.66815	0.000332803	0.00696834
ENSMUSG00000056234	Ncoa4	3860.58	2800.48	2021.55	2172.19	3330.53	2096.87	1.58852	0.667679	0.000263392	0.00568783
ENSMUSG00000061273	Mmgt1	1617.94	1597.58	1000.89	1024.65	1607.76	1012.77	1.58754	0.66679	2.34338e-05	0.000810384
ENSMUSG00000038400	Pmepa1	1968.61	1925.74	1056.6	1397.08	1947.18	1226.84	1.58743	0.666696	0.000241201	0.00536304
ENSMUSG00000017221	Psmd3	2226.9	2386.95	1426.76	1480.26	2306.92	1453.51	1.58711	0.666406	1.10718e-05	0.000423139
ENSMUSG00000005469	Prkaca	3731.44	4110.92	2433.94	2516.26	3921.18	2475.1	1.58422	0.663771	4.95278e-06	0.00020811
ENSMUSG00000038388	Pals2	585.86	528.831	371.965	331.783	557.346	351.874	1.58386	0.663446	0.00160091	0.0246167
ENSMUSG00000039041	Adrm1	1717.68	1757.23	1140.15	1054.9	1737.45	1097.53	1.58293	0.662598	2.78636e-05	0.000936638
ENSMUSG00000026820	Ptges2	758.048	739.477	462.71	483.968	748.762	473.339	1.58202	0.66177	0.000415335	0.00829132
ENSMUSG00000032300	1700017B05Rik	927.086	696.239	519.313	508.545	811.663	513.929	1.57969	0.659638	0.00155689	0.0241426
ENSMUSG00000016344	Ppdpf	787.446	967.861	578.612	533.121	877.653	555.866	1.57845	0.658507	0.00076615	0.0136087
ENSMUSG00000038462	Uqcrfs1	4590.28	4549.94	2809.5	2982.27	4570.11	2895.88	1.57819	0.658268	2.55367e-06	0.000117057
ENSMUSG00000060002	Chpt1	36976.4	31787.5	19739.3	23862.8	34381.9	21801.1	1.5771	0.657273	2.52013e-05	0.000857051
ENSMUSG00000047260	Emc6	1583.29	1735.05	993.703	1110.67	1659.17	1052.19	1.57693	0.657119	6.96583e-05	0.00195615
ENSMUSG00000003865	Gys1	3137.18	3163.01	2011.66	1984.08	3150.1	1997.87	1.57671	0.656914	4.395e-06	0.00018668
ENSMUSG00000038683	Pak1ip1	882.989	927.949	572.322	579.439	905.469	575.88	1.57226	0.652843	0.000254922	0.00558078
ENSMUSG00000027217	Tspan18	1375.41	1342.59	882.293	848.835	1359	865.564	1.57004	0.650801	6.60577e-05	0.00187395
ENSMUSG00000020572	Nampt	2530.33	2556.57	1424.97	1815.83	2543.45	1620.4	1.56983	0.650612	0.000137112	0.00347923
ENSMUSG00000031167	Rbm3	1167.52	1463.43	737.64	940.524	1315.48	839.082	1.56782	0.648763	0.00114708	0.0189135
ENSMUSG00000027282	Mtch2	4845.42	4552.16	2848.13	3148.63	4698.79	2998.38	1.5672	0.648188	7.73777e-06	0.0003062
ENSMUSG00000001891	Ugp2	3115.14	3669.67	2064.67	2264.82	3392.4	2164.75	1.56708	0.648083	4.18411e-05	0.00130075
ENSMUSG00000000384	Tbrg4	606.858	822.626	436.654	476.406	714.742	456.53	1.56532	0.646457	0.00305941	0.0412611
ENSMUSG00000064341	mt-Nd1	104070	126325	64286.1	83088.5	115198	73687.3	1.56333	0.644624	0.000152967	0.00380036
ENSMUSG00000038967	Pdk2	2588.07	1835.94	1371.96	1472.7	2212.01	1422.33	1.55545	0.637332	0.000927848	0.0159551
ENSMUSG00000005268	Prlr	1050.98	1126.4	601.972	798.737	1088.69	700.354	1.55479	0.63672	0.00126889	0.020385
ENSMUSG00000035637	Grhpr	995.332	825.952	609.159	563.369	910.642	586.264	1.55343	0.635455	0.00089691	0.01556
ENSMUSG00000059920	4930453N24Rik	793.745	774.954	457.319	552.972	784.35	505.145	1.55312	0.635174	0.00117722	0.0193086
ENSMUSG00000018585	Atox1	1184.32	1296.02	790.649	807.244	1240.17	798.947	1.55217	0.634287	0.000169446	0.00410638
ENSMUSG00000026858	Miga2	2510.38	2522.2	1725.05	1522.8	2516.29	1623.93	1.54939	0.631696	4.09751e-05	0.00127841
ENSMUSG00000039640	Mrpl12	1370.16	1433.5	863.425	948.086	1401.83	905.756	1.54777	0.630193	0.000141089	0.00355953
ENSMUSG00000062070	Pgk1	3084.69	3312.68	2309.06	1827.17	3198.68	2068.11	1.54648	0.628989	0.00017757	0.0042311
ENSMUSG00000030802	Bckdk	1650.49	1880.29	1140.15	1143.75	1765.39	1141.95	1.54581	0.628361	0.000105955	0.00280235
ENSMUSG00000037916	Ndufv1	2843.2	2923.54	2006.27	1725.08	2883.37	1865.68	1.54534	0.627922	5.23827e-05	0.00156258
ENSMUSG00000044894	Uqcrq	3494.16	3154.14	2122.17	2180.69	3324.15	2151.43	1.54517	0.62777	2.14264e-05	0.000750934
ENSMUSG00000016257	Prelid3b	843.092	906.885	563.338	570.931	874.988	567.134	1.54273	0.625484	0.000538706	0.0101943
ENSMUSG00000018042	Cyb5r3	5267.49	5145.3	3530.97	3218.58	5206.39	3374.77	1.5427	0.625455	9.78503e-06	0.000377654
ENSMUSG00000049090	Zadh2	1856.27	2149.69	1313.56	1286.49	2002.98	1300.02	1.54057	0.623469	0.000110775	0.0028907
ENSMUSG00000036427	Gpi1	6889.63	8533.36	5655.84	4363.28	7711.5	5009.56	1.53925	0.622231	0.000464545	0.00907663
ENSMUSG00000020432	Tcn2	6005.59	4445.73	3605.54	3184.55	5225.66	3395.04	1.53924	0.622221	0.000474469	0.0092244
ENSMUSG00000037710	Cisd1	1652.59	1402.46	939.795	1046.39	1527.52	993.093	1.53845	0.621473	0.000349034	0.00726465
ENSMUSG00000068742	Cry2	1113.97	1302.68	890.379	680.58	1208.33	785.48	1.53785	0.620913	0.00169835	0.0258001
ENSMUSG00000035877	Zhx3	969.083	1087.6	617.246	720.281	1028.34	668.763	1.53777	0.620838	0.000799536	0.014058
ENSMUSG00000058624	Gda	3031.14	3446.83	2035.02	2178.8	3238.98	2106.91	1.53728	0.620384	4.81959e-05	0.00145435
ENSMUSG00000033416	Gucd1	2281.49	1783.84	1514.81	1130.52	2032.66	1322.67	1.53673	0.619864	0.00188957	0.028264
ENSMUSG00000019082	Slc25a22	1910.87	2039.94	1297.38	1275.14	1975.4	1286.26	1.53568	0.618879	5.77586e-05	0.00169068
ENSMUSG00000042444	Mindy2	1539.19	2168.54	1122.18	1293.1	1853.87	1207.64	1.535	0.618243	0.00191224	0.0283904
ENSMUSG00000028124	Gclm	1249.41	1195.14	762.797	830.875	1222.28	796.836	1.53411	0.617401	0.000262436	0.00568783
ENSMUSG00000018474	Chd3	1835.27	1595.36	1303.67	933.907	1715.32	1118.79	1.53301	0.616366	0.00189997	0.0283113
ENSMUSG00000028150	Rorc	710.801	749.455	498.648	453.72	730.128	476.184	1.53299	0.616353	0.00125987	0.0203021
ENSMUSG00000071657	Bscl2	6293.27	6377.02	4018.83	4250.79	6335.14	4134.81	1.53217	0.615575	6.57425e-06	0.000263493
ENSMUSG00000019809	Pex3	1364.91	1131.94	763.695	866.795	1248.42	815.245	1.53173	0.61516	0.00080503	0.0141228
ENSMUSG00000045438	Cox19	1005.83	961.209	608.261	678.69	983.52	643.475	1.52871	0.612319	0.000612735	0.0113614
ENSMUSG00000021577	Sdha	12695.7	12351.6	8395.26	8038.41	12523.7	8216.83	1.52414	0.607996	4.21474e-06	0.000179511
ENSMUSG00000049091	Sephs2	1336.56	1302.68	920.028	811.97	1319.62	865.999	1.52366	0.607537	0.000333015	0.00696834
ENSMUSG00000069744	Psmb3	1340.76	1452.35	856.237	981.17	1396.55	918.704	1.52023	0.604287	0.000408153	0.00821651
ENSMUSG00000009035	Tmem184b	2641.62	3108.69	1969.44	1820.55	2875.15	1894.99	1.51707	0.601289	0.000157649	0.00388064
ENSMUSG00000022546	Gpt	2587.02	3164.12	1863.42	1928.31	2875.57	1895.86	1.51666	0.6009	0.000222349	0.00503958
ENSMUSG00000010936	Vac14	1696.68	1812.66	1176.99	1141.86	1754.67	1159.43	1.51329	0.597686	0.000139242	0.00352509
ENSMUSG00000063524	Eno1	15999.9	18474.7	12638.7	10179.4	17237.3	11409.1	1.5108	0.595313	0.000205353	0.00472181
ENSMUSG00000020682	Mmp28	1023.68	971.187	731.351	588.891	997.433	660.121	1.51072	0.59524	0.00171288	0.0259438
ENSMUSG00000061313	Ddhd2	2596.47	3172.99	1948.77	1871.6	2884.73	1910.18	1.51003	0.594581	0.000258191	0.00562007
ENSMUSG00000024556	Me2	683.503	624.176	421.38	445.213	653.84	433.297	1.50928	0.593857	0.00249432	0.0352201
ENSMUSG00000001627	Ifrd1	1586.44	1446.8	893.973	1117.29	1516.62	1005.63	1.50847	0.593082	0.00100063	0.016964
ENSMUSG00000035284	Vps13c	2435.83	3171.88	1812.2	1906.57	2803.86	1859.39	1.50784	0.592479	0.000655166	0.0120198
ENSMUSG00000024527	Afg3l2	1830.02	1718.42	1181.48	1172.11	1774.22	1176.8	1.50773	0.592379	0.000146228	0.00365711
ENSMUSG00000032238	Rora	1122.37	868.082	630.723	692.869	995.227	661.796	1.50426	0.589058	0.00290882	0.0397445
ENSMUSG00000024997	Prdx3	4099.97	3978.98	2668.44	2703.42	4039.48	2685.93	1.50397	0.588772	2.52219e-05	0.000857051
ENSMUSG00000098188	Sowahc	2117.7	1954.57	1315.35	1394.24	2036.14	1354.8	1.50305	0.58789	0.000155036	0.00383445
ENSMUSG00000018217	Pmp22	3225.38	4373.67	2518.4	2538.94	3799.52	2528.67	1.50246	0.58733	0.000891927	0.0154908
ENSMUSG00000030711	Sult1a1	6481.2	4421.34	3328.81	3948.31	5451.27	3638.56	1.49832	0.583347	0.00290359	0.0397079
ENSMUSG00000006024	Napa	2884.15	3037.73	1930.8	2022.84	2960.94	1976.82	1.49783	0.582877	6.58149e-05	0.00187395
ENSMUSG00000049327	Kmt5a	2693.06	3024.43	1836.46	1985.03	2858.75	1910.74	1.49613	0.581232	0.000153172	0.00380036
ENSMUSG00000004558	Ndrg2	3243.23	3470.11	2033.23	2454.82	3356.67	2244.02	1.49591	0.581023	0.000276432	0.00594348
ENSMUSG00000020664	Dld	5102.65	5357.05	3323.42	3674.19	5229.85	3498.81	1.49478	0.579936	4.98142e-05	0.00149452
ENSMUSG00000059734	Ndufs8	1438.4	1468.98	911.044	1035.99	1453.69	973.519	1.49338	0.578579	0.000511582	0.00978768
ENSMUSG00000020253	Ppm1m	3094.14	2178.52	1681.93	1854.58	2636.33	1768.25	1.49114	0.576414	0.00270232	0.0373474
ENSMUSG00000038150	Ormdl3	5169.84	3686.3	2969.43	2977.54	4428.07	2973.48	1.48929	0.574627	0.00156124	0.0241621
ENSMUSG00000014426	Map3k4	902.938	1074.29	708.889	619.139	988.615	664.014	1.48842	0.573782	0.00250991	0.0353445
ENSMUSG00000035953	Pip4p1	944.935	810.431	601.972	577.548	877.683	589.76	1.48836	0.573725	0.00214926	0.0313388
ENSMUSG00000029195	Klb	2639.52	2786.07	1730.44	1921.69	2712.79	1826.07	1.48564	0.571086	0.000167056	0.00406738
ENSMUSG00000025651	Uqcrc1	5402.93	6097.64	3809.49	3938.86	5750.28	3874.18	1.48423	0.569713	7.4677e-05	0.00207331
ENSMUSG00000031782	Coq9	2731.91	2461.23	1698.1	1803.54	2596.57	1750.82	1.48319	0.568705	0.000197239	0.00458103
ENSMUSG00000056851	Pcbp2	4013.87	3076.53	2427.65	2356.51	3545.2	2392.08	1.48216	0.5677	0.000878184	0.0152861
ENSMUSG00000026003	Acadl	7082.81	5056.6	3626.21	4567.45	6069.71	4096.83	1.48168	0.567237	0.00332308	0.0442822
ENSMUSG00000027074	Slc43a3	2328.74	1819.31	1388.13	1413.15	2074.03	1400.64	1.48096	0.566535	0.00119266	0.0195209
ENSMUSG00000022956	Atp5o	1760.73	1569.86	1241.68	1007.64	1665.3	1124.66	1.4806	0.566184	0.00142281	0.0225558
ENSMUSG00000025968	Ndufs1	3038.49	3187.4	2029.63	2177.86	3112.95	2103.75	1.47974	0.565343	0.000112683	0.00292582
ENSMUSG00000051391	Ywhag	12709.4	13920.3	9229.93	8767.2	13314.9	8998.57	1.47964	0.565244	3.50973e-05	0.00112419
ENSMUSG00000029196	Tada2b	668.804	658.545	433.06	465.063	663.674	449.062	1.47809	0.563737	0.00349845	0.0460522
ENSMUSG00000003464	Pex19	4601.83	4093.18	2977.51	2905.7	4347.51	2941.61	1.47798	0.563626	0.00010968	0.00286691
ENSMUSG00000051285	Pcmtd1	2482.03	2403.58	1566.02	1743.04	2442.8	1654.53	1.47655	0.562235	0.000234014	0.00526314
ENSMUSG00000034341	Wbp2	2602.77	2830.41	1865.21	1815.83	2716.59	1840.52	1.4759	0.561599	0.00016084	0.00395297
ENSMUSG00000060450	Rnf14	1751.28	2061	1121.28	1462.3	1906.14	1291.79	1.47567	0.561375	0.00269651	0.0373001
ENSMUSG00000022354	Ndufb9	1203.22	1114.2	798.736	772.27	1158.71	785.503	1.47517	0.560883	0.000941115	0.01613
ENSMUSG00000025745	Hadha	6893.83	6323.8	4392.6	4569.34	6608.81	4480.97	1.47491	0.560626	5.69963e-05	0.00167464
ENSMUSG00000044792	Isca1	2399.09	2341.49	1502.23	1715.63	2370.29	1608.93	1.47335	0.559097	0.000334167	0.00698311
ENSMUSG00000031400	G6pdx	7184.66	9014.52	5970.3	5030.62	8099.59	5500.46	1.47244	0.558213	0.000861309	0.0150258
ENSMUSG00000025428	Atp5a1	20692	22195.4	14750.1	14384.8	21443.7	14567.5	1.47201	0.557791	2.4285e-05	0.000832453
ENSMUSG00000019923	Zwint	2373.89	2357.01	1531.88	1683.49	2365.45	1607.69	1.47143	0.557223	0.00024066	0.00535862
ENSMUSG00000046671	Mtfr1l	2132.4	2104.24	1389.93	1491.61	2118.32	1440.77	1.47036	0.556172	0.000256906	0.00560851
ENSMUSG00000038717	Atp5l	1923.47	2115.33	1378.25	1372.5	2019.4	1375.37	1.46816	0.554008	0.00035288	0.00731229
ENSMUSG00000013593	Ndufs2	5570.92	5382.55	3787.93	3673.24	5476.73	3730.59	1.46806	0.553913	5.27695e-05	0.00156516
ENSMUSG00000064351	mt-Co1	467024	478932	291901	353978	472978	322940	1.4646	0.550507	0.000167929	0.00408227
ENSMUSG00000031807	Pgls	2042.11	1822.64	1315.35	1324.3	1932.37	1319.82	1.46423	0.55014	0.000487346	0.00940458
ENSMUSG00000066735	Vkorc1l1	1549.69	1651.9	1086.24	1100.27	1600.8	1093.26	1.46419	0.550104	0.000515535	0.00983923
ENSMUSG00000039428	Tmem135	3582.35	4053.26	2516.6	2700.58	3817.81	2608.59	1.46353	0.549453	0.000246198	0.00544317
ENSMUSG00000027673	Ndufb5	1636.84	1753.9	1196.76	1121.07	1695.37	1158.91	1.46275	0.54868	0.000560114	0.0104581
ENSMUSG00000021236	Entpd5	1823.72	1559.89	1133.86	1179.67	1691.81	1156.77	1.46272	0.548656	0.000958577	0.0164037
ENSMUSG00000056938	Acbd4	3468.96	3109.79	2324.33	2179.75	3289.38	2252.04	1.46064	0.546604	0.00026345	0.00568783
ENSMUSG00000024359	Hspa9	10593.8	10418.1	7397.96	7000.53	10505.9	7199.24	1.4593	0.545275	4.28469e-05	0.00132622
ENSMUSG00000053768	Chchd3	2104.06	1806.01	1274.92	1409.37	1955.03	1342.15	1.45687	0.542872	0.00105587	0.0177085
ENSMUSG00000050737	Ptges	3414.37	4681.88	2908.33	2652.37	4048.12	2780.35	1.45583	0.541844	0.00269431	0.0373001
ENSMUSG00000048911	Rnf24	898.738	1034.38	679.24	649.387	966.559	664.313	1.45471	0.540727	0.00289067	0.0395657
ENSMUSG00000005299	Letm1	1964.42	2068.76	1380.94	1392.35	2016.59	1386.65	1.45425	0.540275	0.000379386	0.00770154
ENSMUSG00000024132	Eci1	2987.04	2477.86	1698.1	2060.65	2732.45	1879.37	1.45414	0.540163	0.00189433	0.0282811
ENSMUSG00000017999	Ddx27	952.285	1165.2	728.655	728.788	1058.74	728.722	1.45263	0.538666	0.00354888	0.0464511
ENSMUSG00000031969	Acad8	856.741	843.691	566.033	604.96	850.216	585.497	1.45227	0.538314	0.00285151	0.0391557
ENSMUSG00000035949	Fbxw2	1757.58	1426.85	1059.29	1137.14	1592.21	1098.21	1.45008	0.536135	0.00228389	0.0328422
ENSMUSG00000070509	Rgma	1422.65	1145.25	860.73	911.221	1283.95	885.976	1.44949	0.535543	0.00323872	0.0433429
ENSMUSG00000037110	Ralgapa2	4518.89	4089.85	3075.45	2864.11	4304.37	2969.78	1.4494	0.535456	0.000245941	0.00544317
ENSMUSG00000041697	Cox6a1	7679.17	6563.27	4645.07	5184.7	7121.22	4914.88	1.44899	0.535044	0.000425316	0.00845816
ENSMUSG00000020869	Lrrc59	2747.66	3293.83	2006.27	2169.35	3020.75	2087.81	1.4468	0.532862	0.000911765	0.0157305
ENSMUSG00000074582	Arfgef2	1928.72	1800.47	1335.12	1248.68	1864.59	1291.9	1.44329	0.529361	0.000728801	0.0130709
ENSMUSG00000048486	Fitm2	4999.76	4321.56	3104.2	3359.42	4660.66	3231.81	1.44222	0.52829	0.000467688	0.00912663
ENSMUSG00000029198	Grpel1	1392.2	1372.52	955.069	962.265	1382.36	958.667	1.44199	0.528064	0.00101205	0.0171391
ENSMUSG00000024773	Atg2a	1410.05	1401.35	961.358	988.732	1405.7	975.045	1.44172	0.527795	0.00099847	0.016964
ENSMUSG00000030884	Uqcrc2	3751.39	4196.28	2831.96	2698.69	3973.84	2765.33	1.43694	0.522997	0.000367828	0.0075059
ENSMUSG00000022450	Ndufa6	1714.53	1638.6	1134.76	1200.47	1676.57	1167.61	1.43601	0.522061	0.000910571	0.0157272
ENSMUSG00000027624	Epb41l1	3023.79	2793.83	1985.61	2067.26	2908.81	2026.44	1.43552	0.521571	0.000408734	0.00821651
ENSMUSG00000026626	Ppp2r5a	15094.8	16618.8	10901.1	11218.2	15856.8	11059.7	1.43374	0.519787	0.000125293	0.00322115
ENSMUSG00000070730	Rmdn3	909.238	995.578	654.083	677.745	952.408	665.914	1.43015	0.516168	0.00359778	0.0468251
ENSMUSG00000020720	Psmd12	1153.87	1232.83	813.111	859.233	1193.35	836.172	1.42715	0.513141	0.00228354	0.0328422
ENSMUSG00000008734	Gprc5b	2557.62	2137.5	1681.93	1608.82	2347.56	1645.37	1.42686	0.512841	0.00160044	0.0246167
ENSMUSG00000063694	Cycs	2341.34	2221.76	1661.26	1537.92	2281.55	1599.59	1.4263	0.51228	0.000756267	0.01351
ENSMUSG00000026260	Ndufa10	3668.45	3631.97	2573.2	2549.34	3650.21	2561.27	1.42515	0.511119	0.000268411	0.00578695
ENSMUSG00000004071	Cdip1	1236.82	1167.42	817.603	869.63	1202.12	843.617	1.42512	0.511084	0.00232318	0.0332847
ENSMUSG00000031068	Glrx3	3207.53	2676.31	1996.39	2135.32	2941.92	2065.86	1.42422	0.510168	0.0014573	0.0229627
ENSMUSG00000019179	Mdh2	5536.27	5966.81	3977.51	4112.78	5751.54	4045.15	1.42182	0.507742	0.00025988	0.00564192
ENSMUSG00000025791	Pgm1	4658.53	4739.53	2940.68	3687.42	4699.03	3314.05	1.418	0.503853	0.00169114	0.0257643
ENSMUSG00000062908	Acadm	7236.1	5595.41	4269.51	4795.26	6415.76	4532.38	1.41563	0.501444	0.00288356	0.0395315
ENSMUSG00000063882	Uqcrh	2590.17	2680.74	1876.89	1847.96	2635.46	1862.43	1.41502	0.500827	0.000594573	0.011064
ENSMUSG00000000399	Ndufa9	1959.17	2065.44	1496.84	1349.82	2012.3	1423.33	1.41365	0.499424	0.00143347	0.0226734
ENSMUSG00000031231	Cox7b	1952.87	1892.48	1334.22	1388.57	1922.68	1361.4	1.41235	0.498102	0.00110667	0.0184024
ENSMUSG00000021024	Psma6	1877.27	1866.99	1226.4	1432.05	1872.13	1329.23	1.40859	0.494247	0.00235853	0.0336985
ENSMUSG00000052712	BC004004	1648.39	1747.25	1285.7	1124.85	1697.82	1205.28	1.40846	0.494117	0.00253007	0.0355005
ENSMUSG00000034593	Myo5a	2512.48	2837.06	1868.81	1933.98	2674.77	1901.4	1.40668	0.492297	0.00125107	0.0201811
ENSMUSG00000032437	Stt3b	8297.58	7298.32	5326.1	5766.03	7797.95	5546.06	1.40609	0.491688	0.000694799	0.0125819
ENSMUSG00000025393	Atp5b	31118.8	30964.9	21658.4	22560.3	31041.9	22109.3	1.40402	0.489563	0.000147335	0.00367303
ENSMUSG00000041168	Lonp1	2581.77	2536.62	1865.21	1784.63	2559.19	1824.92	1.40233	0.487829	0.000883171	0.0153558
ENSMUSG00000064370	mt-Cytb	208379	208433	136932	160692	208406	148812	1.40047	0.485907	0.000556849	0.0104581
ENSMUSG00000021102	Glrx5	1700.88	1500.02	1111.4	1176.84	1600.45	1144.12	1.39904	0.484434	0.00317689	0.0426248
ENSMUSG00000004789	Dlst	4448.54	4236.19	3071.85	3142.01	4342.37	3106.93	1.39768	0.48303	0.000537193	0.010178
ENSMUSG00000000171	Sdhd	2653.17	2688.5	2010.77	1817.72	2670.84	1914.24	1.39516	0.480427	0.00134832	0.0215058
ENSMUSG00000031785	Adgrg1	2013.76	1776.07	1350.39	1367.78	1894.92	1359.09	1.39438	0.479629	0.00255017	0.0357184
ENSMUSG00000028405	Aco1	5869.1	6313.82	4339.59	4401.09	6091.46	4370.34	1.3938	0.479022	0.000509558	0.00977288
ENSMUSG00000028042	Zbtb7b	1855.22	1760.55	1380.04	1214.65	1807.89	1297.34	1.39345	0.478661	0.00298123	0.0404861
ENSMUSG00000000563	Atp5pb	4337.25	4742.85	3252.44	3263.95	4540.05	3258.2	1.39338	0.478593	0.000738317	0.0132195
ENSMUSG00000027406	Idh3b	3921.48	3924.66	2862.51	2794.16	3923.07	2828.34	1.38704	0.472014	0.000709611	0.0128082
ENSMUSG00000024990	Rbp4	9768.53	9234.04	6946.93	6764.21	9501.28	6855.57	1.38593	0.470852	0.000441056	0.00869375
ENSMUSG00000028756	Pink1	3422.76	3157.47	2291.98	2457.65	3290.12	2374.82	1.38551	0.470419	0.00139887	0.0222213
ENSMUSG00000005625	Psmd4	2064.16	1779.4	1354.89	1419.77	1921.78	1387.33	1.38541	0.470311	0.00370402	0.0478097
ENSMUSG00000021361	Tmem14c	1405.85	1531.06	1040.42	1079.48	1468.46	1059.95	1.38535	0.470254	0.00370277	0.0478097
ENSMUSG00000018574	Acadvl	2244.75	2047.7	1583.1	1516.18	2146.22	1549.64	1.38502	0.469906	0.00224905	0.0324607
ENSMUSG00000052337	Immt	4088.42	4828.22	3054.78	3385.89	4458.32	3220.33	1.38441	0.469268	0.00259614	0.0362283
ENSMUSG00000018677	Slc25a39	3512.01	3668.56	2582.19	2609.84	3590.28	2596.01	1.38298	0.467781	0.000930768	0.0159877
ENSMUSG00000060429	Sntb1	3360.82	2968.99	2341.4	2236.46	3164.91	2288.93	1.38274	0.467534	0.00191255	0.0283904
ENSMUSG00000020821	Kif1c	6174.63	6389.21	4616.31	4479.54	6281.92	4547.93	1.38125	0.46597	0.000588879	0.0109711
ENSMUSG00000011752	Pgam1	3474.21	3769.45	2727.74	2518.15	3621.83	2622.94	1.38073	0.465436	0.00152045	0.0237425
ENSMUSG00000038145	Snrk	3950.88	3431.31	2584.88	2765.8	3691.09	2675.34	1.37978	0.464435	0.00222537	0.0322166
ENSMUSG00000059447	Hadhb	5670.66	5473.46	3830.16	4261.19	5572.06	4045.67	1.37735	0.46189	0.00116273	0.019143
ENSMUSG00000002010	Idh3g	3404.92	3389.18	2295.58	2640.08	3397.05	2467.83	1.37662	0.461127	0.00219527	0.0318907
ENSMUSG00000021178	Psmc1	1749.18	1641.93	1205.74	1259.07	1695.55	1232.41	1.37592	0.460394	0.00335259	0.0445995
ENSMUSG00000037815	Ctnna1	5267.49	6347.08	4355.76	4091.04	5807.29	4223.4	1.37495	0.459377	0.00282158	0.0388241
ENSMUSG00000048142	Nat8l	5216.04	5616.48	4003.56	3885.92	5416.26	3944.74	1.37299	0.457321	0.00101747	0.0171935
ENSMUSG00000039196	Orm1	2958.7	3318.22	2205.73	2368.8	3138.46	2287.26	1.37212	0.45641	0.00251493	0.0353833
ENSMUSG00000020456	Ogdh	9080.83	9217.41	6848.1	6519.39	9149.12	6683.75	1.36884	0.452957	0.000687011	0.0125014
ENSMUSG00000024099	Ndufv2	2209.05	2419.1	1631.61	1750.6	2314.07	1691.11	1.36837	0.452453	0.00321674	0.0430856
ENSMUSG00000031818	Cox4i1	9538.59	8594.34	6488.72	6789.73	9066.47	6639.22	1.36563	0.449564	0.0012391	0.0200678
ENSMUSG00000025261	Huwe1	7896.51	8622.06	6191.32	5905.93	8259.28	6048.62	1.36544	0.44937	0.00114108	0.0188411
ENSMUSG00000030987	Stim1	2022.16	1899.14	1409.69	1463.25	1960.65	1436.47	1.365	0.448902	0.00339516	0.0449744
ENSMUSG00000044308	Ubr3	3410.17	3475.65	2360.27	2717.6	3442.91	2538.93	1.35612	0.439481	0.00352708	0.0462863
ENSMUSG00000006818	Sod2	2980.75	3314.9	2407.89	2238.35	3147.82	2323.12	1.35489	0.438175	0.00352871	0.0462863
ENSMUSG00000020402	Vdac1	4064.27	3967.9	3004.47	2947.29	4016.08	2975.88	1.34955	0.432475	0.00188794	0.028264
ENSMUSG00000002981	Clptm1	3111.99	2894.71	2263.23	2191.09	3003.35	2227.16	1.34853	0.431392	0.00309986	0.0416987
ENSMUSG00000030122	Ptms	7979.45	7947.99	6085.3	5739.56	7963.72	5912.43	1.34693	0.429673	0.00141724	0.0224903
ENSMUSG00000061436	Hipk2	4275.31	3797.16	3042.2	2964.31	4036.24	3003.25	1.344	0.42653	0.00353927	0.0463724
ENSMUSG00000075706	Gpx4	13973.5	15227.5	11127.5	10624.6	14600.5	10876.1	1.34242	0.424838	0.00170009	0.0258001
ENSMUSG00000007891	Ctsd	18008.4	19546.8	14702.5	13372.5	18777.6	14037.5	1.33765	0.419706	0.00235245	0.0336424
ENSMUSG00000028691	Prdx1	7773.67	7273.93	5379.11	5931.45	7523.8	5655.28	1.33045	0.411913	0.003414	0.0451473
ENSMUSG00000022365	Derl1	6246.02	6657.51	5079.92	4637.4	6451.77	4858.66	1.32784	0.40908	0.00368383	0.0476559
ENSMUSG00000010277	2610507B11Rik	9061.93	8872.61	6812.16	6903.16	8967.27	6857.66	1.30764	0.386962	0.00342839	0.0452612
ENSMUSG00000025810	Nrp1	2335.04	2194.04	2926.3	3172.26	2264.54	3049.28	-1.34644	-0.429153	0.00367502	0.0475925
ENSMUSG00000040249	Lrp1	12656.9	11139.8	16746.5	15295.1	11898.4	16020.8	-1.34646	-0.429171	0.00265408	0.0368764
ENSMUSG00000032531	Amotl2	4309.95	3608.69	5342.27	5398.33	3959.32	5370.3	-1.35628	-0.43966	0.00365125	0.0473632
ENSMUSG00000022283	Pabpc1	6734.24	6071.03	8570.46	8799.34	6402.63	8684.9	-1.35642	-0.439801	0.00150854	0.023623
ENSMUSG00000028530	Jak1	2682.57	2833.74	3920	3567.38	2758.15	3743.69	-1.3574	-0.440842	0.00250433	0.0352977
ENSMUSG00000036256	Igfbp7	6656.54	5654.17	8477.02	8286.07	6155.36	8381.54	-1.36162	-0.445324	0.00236267	0.0337269
ENSMUSG00000055737	Ghr	16649.8	18961.4	23017.8	25658.8	17805.6	24338.3	-1.3669	-0.450906	0.00172468	0.0260721
ENSMUSG00000026031	Cflar	1866.77	1701.79	2433.04	2451.98	1784.28	2442.51	-1.3688	-0.452916	0.00261332	0.0363748
ENSMUSG00000018340	Anxa6	3855.34	4237.3	5548.02	5550.51	4046.32	5549.27	-1.37149	-0.455739	0.00116468	0.019143
ENSMUSG00000027803	Wwtr1	2317.19	1962.33	2840.95	3071.12	2139.76	2956.03	-1.38131	-0.466041	0.00326174	0.043595
ENSMUSG00000073411	H2-D1	23532	20816.2	27700.6	33844.7	22174.1	30772.6	-1.38775	-0.472751	0.00224882	0.0324607
ENSMUSG00000024431	Nr3c1	2942.95	2733.96	3698.08	4187.46	2838.45	3942.77	-1.38896	-0.474005	0.00153584	0.0239348
ENSMUSG00000001025	S100a6	1195.87	1055.45	1530.98	1599.36	1125.66	1565.17	-1.39025	-0.475341	0.00375046	0.0482101
ENSMUSG00000031246	Sh3bgrl	3251.63	3197.38	4115.87	4855.75	3224.5	4485.81	-1.3911	-0.476226	0.00165899	0.0253735
ENSMUSG00000025366	Esyt1	3349.27	3066.56	4437.52	4491.83	3207.91	4464.67	-1.39171	-0.476856	0.00077926	0.0137946
ENSMUSG00000024074	Crim1	1273.56	1139.7	1730.44	1630.56	1206.63	1680.5	-1.39262	-0.477799	0.00311854	0.0418779
ENSMUSG00000031441	Atp11a	1364.91	1471.19	2052.99	1904.68	1418.05	1978.84	-1.39561	-0.480894	0.00206005	0.0302637
ENSMUSG00000021559	Dapk1	2310.89	2722.87	3490.54	3542.8	2516.88	3516.67	-1.39734	-0.482687	0.00166418	0.0254031
ENSMUSG00000027593	Raly	1483.55	1620.86	2352.18	1994.48	1552.21	2173.33	-1.40034	-0.48578	0.00309258	0.0416367
ENSMUSG00000069833	Ahnak	16006.2	14249.6	22369.1	20014.7	15127.9	21191.9	-1.40084	-0.486296	0.000662112	0.0121188
ENSMUSG00000042700	Sipa1l1	1287.21	1187.38	1700.79	1789.36	1237.29	1745.08	-1.41025	-0.495948	0.0016997	0.0258001
ENSMUSG00000002900	Lamb1	4299.45	3294.94	5581.27	5130.82	3797.2	5356.04	-1.41044	-0.496144	0.00326314	0.043595
ENSMUSG00000050315	Synpo2	1465.7	1467.87	2297.38	1841.35	1466.78	2069.36	-1.41095	-0.496662	0.00358122	0.0466873
ENSMUSG00000006800	Sulf2	2146.05	2117.54	2679.22	3340.52	2131.8	3009.87	-1.41179	-0.497525	0.00250101	0.0352828
ENSMUSG00000020571	Pdia6	2166	1911.33	3141.03	2628.74	2038.67	2884.89	-1.41507	-0.500871	0.00231795	0.0332402
ENSMUSG00000027712	Anxa5	3455.31	3393.61	4551.62	5192.26	3424.46	4871.94	-1.42263	-0.508565	0.000501829	0.00963648
ENSMUSG00000029826	Zc3hav1	874.59	822.626	1158.12	1266.64	848.608	1212.38	-1.42847	-0.51447	0.0024317	0.0345855
ENSMUSG00000041633	Kctd12b	770.647	681.827	1055.7	1019.93	726.237	1037.81	-1.42883	-0.514836	0.00352974	0.0462863
ENSMUSG00000026365	Cfh	3051.09	2399.14	4136.53	3665.68	2725.12	3901.11	-1.43144	-0.51747	0.00226971	0.0327286
ENSMUSG00000019326	Aoc3	14191.9	14316.1	19933.3	21063	14254	20498.2	-1.43806	-0.524125	6.12138e-05	0.00177191
ENSMUSG00000027864	Ptgfrn	1100.32	1345.91	1901.15	1616.38	1223.12	1758.77	-1.43826	-0.524322	0.0034808	0.0459142
ENSMUSG00000024054	Smchd1	642.556	615.307	903.856	906.495	628.931	905.176	-1.43913	-0.525197	0.00297393	0.0404222
ENSMUSG00000037242	Clic4	5477.47	4573.23	7030.49	7464.64	5025.35	7247.57	-1.44212	-0.528191	0.000484179	0.00936659
ENSMUSG00000020189	Osbpl8	809.494	796.019	1149.14	1167.38	802.757	1158.26	-1.4428	-0.528876	0.00151994	0.0237425
ENSMUSG00000075254	Heg1	3113.04	2853.69	4415.06	4206.36	2983.36	4310.71	-1.44487	-0.530943	0.000215836	0.00492516
ENSMUSG00000066026	Dhrs3	1825.82	1841.49	2632.5	2679.79	1833.66	2656.14	-1.44855	-0.534609	0.000237949	0.0053134
ENSMUSG00000026483	Niban1	718.151	746.129	1115	1007.64	732.14	1061.32	-1.4498	-0.53585	0.00214348	0.0313128
ENSMUSG00000023022	Lima1	1025.78	1131.94	1678.33	1450.01	1078.86	1564.17	-1.45009	-0.536144	0.00161695	0.0248277
ENSMUSG00000032902	Slc16a1	1475.15	1731.73	2201.24	2453.87	1603.44	2327.56	-1.4517	-0.537747	0.00104042	0.0175143
ENSMUSG00000005973	Rcn1	551.212	577.612	859.831	779.832	564.412	819.831	-1.45277	-0.538807	0.00359063	0.046771
ENSMUSG00000022150	Dab2	1488.8	1456.78	2168.89	2120.2	1472.79	2144.55	-1.4561	-0.54211	0.000301026	0.00638285
ENSMUSG00000027248	Pdia3	4278.46	4094.29	6549.81	5659.21	4186.37	6104.51	-1.45821	-0.544194	0.000214353	0.00489848
ENSMUSG00000028402	Mpdz	1001.63	1361.44	1728.65	1718.47	1181.53	1723.56	-1.45907	-0.545051	0.00368601	0.0476559
ENSMUSG00000038725	Pkhd1l1	605.808	524.397	836.471	817.642	565.103	827.056	-1.46326	-0.54919	0.00342487	0.0452529
ENSMUSG00000039831	Arhgap29	4374	4114.24	5795.1	6626.21	4244.12	6210.65	-1.46329	-0.549214	0.000171281	0.00412682
ENSMUSG00000095041	-	2043.16	2023.31	2744.81	3210.07	2033.23	2977.44	-1.4643	-0.550212	0.000394222	0.00798197
ENSMUSG00000074794	Arrdc3	889.289	794.91	1097.03	1375.34	842.099	1236.18	-1.46762	-0.553481	0.00319788	0.0428697
ENSMUSG00000016494	Cd34	2213.25	2196.26	3247.95	3243.15	2204.75	3245.55	-1.47206	-0.557841	8.69918e-05	0.00236894
ENSMUSG00000037712	Fermt2	2037.91	1930.18	2780.75	3080.57	1984.04	2930.66	-1.477	-0.562674	0.000183975	0.00436375
ENSMUSG00000028076	Cd1d1	2870.5	2942.39	3794.22	4796.2	2906.44	4295.21	-1.47776	-0.563415	0.000558951	0.0104581
ENSMUSG00000007655	Cav1	18853.6	19868.3	26568.5	30718.8	19360.9	28643.6	-1.47945	-0.565063	6.39909e-05	0.00183868
ENSMUSG00000064080	Fbln2	2549.22	1994.48	3536.36	3189.28	2271.85	3362.82	-1.48008	-0.565677	0.000920659	0.0158489
ENSMUSG00000071176	Arhgef10	463.018	522.179	746.625	714.609	492.599	730.617	-1.48354	-0.569045	0.00304867	0.0411518
ENSMUSG00000038507	Parp12	660.405	599.786	859.831	1011.42	630.095	935.625	-1.48452	-0.569999	0.00244709	0.0346472
ENSMUSG00000033327	Tnxb	3990.78	4122	6937.05	5106.24	4056.39	6021.65	-1.48456	-0.570033	0.00104093	0.0175143
ENSMUSG00000020057	Dram1	2944	2232.84	3575.89	4120.35	2588.42	3848.12	-1.48647	-0.571893	0.00126893	0.020385
ENSMUSG00000033295	Ptprf	681.403	721.738	1104.21	983.061	701.571	1043.64	-1.48782	-0.573199	0.00124325	0.0200965
ENSMUSG00000034947	Tmem106a	535.463	600.894	776.274	915.002	568.179	845.638	-1.48838	-0.573743	0.00304715	0.0411518
ENSMUSG00000000957	Mmp14	1213.72	1118.64	1814	1658.91	1166.18	1736.46	-1.48897	-0.574314	0.000367031	0.00749942
ENSMUSG00000033377	Palmd	1461.5	1221.74	1874.2	2122.09	1341.62	1998.14	-1.48906	-0.574407	0.000762665	0.0135777
ENSMUSG00000070462	Tlnrd1	579.56	754.998	1058.39	932.962	667.279	995.677	-1.4927	-0.577926	0.00389335	0.0499236
ENSMUSG00000022893	Adamts1	746.499	817.083	1216.52	1120.12	781.791	1168.32	-1.49468	-0.579835	0.000789827	0.0139288
ENSMUSG00000005397	Nid1	9245.66	8298.33	13673.7	12550.1	8772	13111.9	-1.49473	-0.579886	3.86778e-05	0.00121157
ENSMUSG00000041215	Yeats2	575.36	495.571	800.532	800.627	535.466	800.58	-1.49476	-0.579918	0.0022435	0.0324405
ENSMUSG00000026712	Mrc1	2016.91	1750.58	3059.27	2600.38	1883.74	2829.83	-1.50219	-0.587066	0.000364245	0.00745225
ENSMUSG00000036943	Rab8b	759.098	599.786	1078.16	966.046	679.442	1022.1	-1.50402	-0.588824	0.00244167	0.0346017
ENSMUSG00000026728	Vim	8467.67	9647.57	13103.2	14242.1	9057.62	13672.7	-1.50954	-0.59411	3.3336e-05	0.00107438
ENSMUSG00000033420	Antxr1	1233.67	1118.64	2010.77	1545.48	1176.15	1778.12	-1.51187	-0.59633	0.00118692	0.0194473
ENSMUSG00000036478	Btg1	2434.78	1987.83	3118.57	3569.27	2211.31	3343.92	-1.51199	-0.596447	0.000355769	0.00732678
ENSMUSG00000039607	Rbms3	444.119	461.203	636.113	733.514	452.661	684.814	-1.51276	-0.59718	0.00255854	0.0358035
ENSMUSG00000053617	Sh3pxd2a	10214.7	10612.1	16282	15321.6	10413.4	15801.8	-1.51746	-0.601659	5.91775e-06	0.000241515
ENSMUSG00000055723	Rras2	680.353	736.151	1132.07	1018.03	708.252	1075.05	-1.51817	-0.602336	0.000663927	0.0121237
ENSMUSG00000039031	Arhgap18	1029.98	896.907	1459.11	1467.03	963.443	1463.07	-1.51835	-0.6025	0.000319568	0.00672298
ENSMUSG00000072941	Sod3	2777.06	3308.24	4070.95	5188.48	3042.65	4629.71	-1.52163	-0.605616	0.000501732	0.00963648
ENSMUSG00000039234	Sec24d	619.457	659.653	989.21	959.429	639.555	974.32	-1.52362	-0.607499	0.000554422	0.0104412
ENSMUSG00000021733	Slc4a7	610.008	639.697	1040.42	865.849	624.853	953.136	-1.52568	-0.609454	0.00120268	0.0196438
ENSMUSG00000071847	Apcdd1	2674.17	2205.13	3606.44	3840.55	2439.65	3723.5	-1.52608	-0.609826	0.00012567	0.00322554
ENSMUSG00000028532	Cachd1	1410.05	1270.53	1955.06	2141.94	1340.29	2048.5	-1.52819	-0.611828	0.000126145	0.00323242
ENSMUSG00000020911	Krt19	555.412	569.852	916.434	804.408	562.632	860.421	-1.52951	-0.613066	0.000989538	0.0168491
ENSMUSG00000044337	Ackr3	865.141	856.995	1362.07	1273.25	861.068	1317.66	-1.53032	-0.613833	0.00020139	0.00466359
ENSMUSG00000055485	Soga1	740.199	667.414	1152.73	1003.86	703.807	1078.29	-1.53203	-0.615446	0.000691557	0.0125549
ENSMUSG00000007872	Id3	1230.52	1321.52	2127.57	1783.69	1276.02	1955.63	-1.53281	-0.616181	0.000235839	0.00528896
ENSMUSG00000017466	Timp2	7336.9	6656.4	11983.7	9495.04	6996.65	10739.4	-1.53494	-0.618181	0.000117516	0.00304121
ENSMUSG00000021806	Nid2	972.233	1251.68	1598.37	1821.5	1111.96	1709.93	-1.53799	-0.62105	0.000773708	0.0137118
ENSMUSG00000060519	Tor3a	440.97	430.16	591.19	750.529	435.565	670.859	-1.53984	-0.622779	0.00306987	0.0413665
ENSMUSG00000031875	Cmtm3	540.713	470.072	812.213	744.857	505.393	778.535	-1.54023	-0.623147	0.00126869	0.020385
ENSMUSG00000041936	Agrn	901.888	797.127	1116.79	1502.95	849.508	1309.87	-1.54153	-0.624361	0.00164759	0.0252485
ENSMUSG00000026879	Gsn	97599.2	75228.2	131457	135023	86413.7	133240	-1.54188	-0.624693	8.22184e-05	0.00224677
ENSMUSG00000049502	Dtx3l	622.607	493.354	787.954	935.798	557.981	861.876	-1.544	-0.626672	0.00230373	0.0330667
ENSMUSG00000028893	Sesn2	319.178	319.294	463.608	522.724	319.236	493.166	-1.54463	-0.627259	0.003578	0.0466842
ENSMUSG00000035000	Dpp4	813.694	648.567	1179.68	1081.37	731.13	1130.53	-1.54595	-0.628496	0.000871183	0.0151811
ENSMUSG00000049775	Tmsb4x	8054	7613.18	12061.9	12197.5	7833.59	12129.7	-1.5484	-0.63078	2.01201e-06	9.50144e-05
ENSMUSG00000037902	Sirpa	760.148	768.302	1227.3	1140.92	764.225	1184.11	-1.54953	-0.631833	0.000189154	0.00444612
ENSMUSG00000056917	Sipa1	767.497	674.066	1215.62	1018.98	720.782	1117.3	-1.55006	-0.632324	0.000695463	0.0125819
ENSMUSG00000019899	Lama2	950.185	706.217	1439.34	1128.63	828.201	1283.99	-1.55012	-0.632376	0.00252105	0.0354375
ENSMUSG00000026748	Plxdc2	1100.32	942.362	1527.39	1640.95	1021.34	1584.17	-1.55076	-0.632977	0.000186495	0.00441683
ENSMUSG00000060671	Atp8b2	487.167	476.724	801.431	693.814	481.945	747.622	-1.5514	-0.633574	0.001097	0.0182612
ENSMUSG00000047497	Adamts12	958.584	698.456	1244.37	1330.91	828.52	1287.64	-1.55365	-0.635657	0.00131666	0.0210437
ENSMUSG00000018819	Lsp1	1168.57	1456.78	2249.76	1832.84	1312.68	2041.3	-1.55541	-0.637296	0.000554176	0.0104412
ENSMUSG00000022037	Clu	1552.84	1363.65	2144.64	2394.32	1458.25	2269.48	-1.55607	-0.63791	7.99273e-05	0.00219183
ENSMUSG00000052160	Pld4	554.362	443.464	792.446	760.927	498.913	776.686	-1.55629	-0.638114	0.00146278	0.023026
ENSMUSG00000026674	Ddr2	2085.16	1937.94	3409.68	2853.71	2011.55	3131.69	-1.55688	-0.638653	6.60515e-05	0.00187395
ENSMUSG00000040711	Sh3pxd2b	657.255	982.274	1352.19	1200.47	819.764	1276.33	-1.55751	-0.639245	0.00298883	0.0405541
ENSMUSG00000031503	Col4a2	7193.06	6871.48	11459	10489.4	7032.27	10974.2	-1.56055	-0.642058	2.78146e-06	0.000125656
ENSMUSG00000027639	Samhd1	1420.55	1062.1	1975.72	1899.95	1241.32	1937.84	-1.5608	-0.642289	0.000469255	0.00914579
ENSMUSG00000002985	Apoe	18197.3	17694.2	27626.9	28582.5	17945.8	28104.7	-1.56608	-0.647159	5.72607e-07	3.1852e-05
ENSMUSG00000063146	Clip2	377.974	429.052	636.113	628.592	403.513	632.352	-1.5675	-0.648464	0.0012317	0.0199716
ENSMUSG00000000058	Cav2	4427.55	4318.23	6150.89	7591.31	4372.89	6871.1	-1.57124	-0.651899	2.8464e-05	0.000950687
ENSMUSG00000022186	Oxct1	2887.3	3303.81	4474.36	5260.32	3095.56	4867.34	-1.5724	-0.652964	3.58181e-05	0.00114027
ENSMUSG00000000753	Serpinf1	950.185	1251.68	1645.99	1817.72	1100.93	1731.85	-1.57336	-0.653846	0.000437775	0.00867284
ENSMUSG00000029580	Actb	14020.7	14252.9	23280.1	21213.3	14136.8	22246.7	-1.57368	-0.654144	1.07144e-06	5.50909e-05
ENSMUSG00000029581	Fscn1	944.935	827.061	1410.59	1379.12	885.998	1394.86	-1.57411	-0.654533	0.000106412	0.00280967
ENSMUSG00000017754	Pltp	1710.33	1117.53	2338.7	2114.53	1413.93	2226.62	-1.57448	-0.654878	0.0016498	0.0252575
ENSMUSG00000062825	Actg1	6276.47	6405.84	10714.2	9266.29	6341.16	9990.24	-1.5755	-0.655806	4.8229e-06	0.000203199
ENSMUSG00000014329	Bicc1	407.372	409.096	632.519	654.113	408.234	643.316	-1.57581	-0.656094	0.000785897	0.0138963
ENSMUSG00000001663	Gstt1	624.707	611.981	921.825	1028.43	618.344	975.129	-1.57682	-0.657014	0.000253866	0.00557329
ENSMUSG00000028300	C9orf72	840.992	982.274	1277.62	1597.47	911.633	1437.55	-1.57695	-0.657135	0.000458706	0.00897376
ENSMUSG00000024011	Pi16	1046.78	783.823	1585.79	1304.45	915.301	1445.12	-1.5786	-0.658649	0.00100016	0.016964
ENSMUSG00000037697	Ddhd1	531.263	488.92	788.852	822.368	510.092	805.61	-1.57907	-0.659071	0.000402533	0.0081292
ENSMUSG00000022257	Laptm4b	1453.1	1625.3	2265.03	2599.44	1539.2	2432.23	-1.58024	-0.660147	4.45874e-05	0.00136122
ENSMUSG00000049791	Fzd4	4443.29	3794.95	5707.05	7334.2	4119.12	6520.62	-1.5829	-0.662571	0.000108863	0.00285511
ENSMUSG00000056870	Gulp1	931.286	697.348	1399.81	1178.73	814.317	1289.27	-1.58296	-0.662628	0.000959185	0.0164037
ENSMUSG00000026825	Dnm1	469.318	634.154	925.419	821.423	551.736	873.421	-1.58374	-0.663338	0.00162151	0.0248732
ENSMUSG00000037552	Plekhg2	287.68	296.012	482.476	442.377	291.846	462.427	-1.58474	-0.664245	0.00237839	0.0339092
ENSMUSG00000074743	Thbd	3191.78	2535.51	5156.29	3922.79	2863.64	4539.54	-1.58519	-0.664654	0.00033734	0.00704
ENSMUSG00000038174	Fam126b	1300.86	1442.37	1996.39	2365.02	1371.61	2180.7	-1.5899	-0.668937	6.1066e-05	0.00177091
ENSMUSG00000000275	Trim25	1149.67	987.817	1532.78	1873.49	1068.74	1703.13	-1.59323	-0.671957	0.000192432	0.00450597
ENSMUSG00000026020	Nop58	300.279	394.683	566.033	542.574	347.481	554.303	-1.596	-0.674462	0.00262212	0.0364648
ENSMUSG00000061288	Taok3	288.73	260.535	422.279	454.665	274.633	438.472	-1.59609	-0.674544	0.00265667	0.0368796
ENSMUSG00000029484	Anxa3	706.601	771.628	1194.96	1164.55	739.115	1179.75	-1.5964	-0.674818	7.77723e-05	0.00213984
ENSMUSG00000029163	Emilin1	395.823	381.379	687.326	553.917	388.601	620.621	-1.59727	-0.675611	0.00146931	0.0230822
ENSMUSG00000036986	Pml	568.011	484.485	811.314	871.521	526.248	841.418	-1.59842	-0.676643	0.000411133	0.00822846
ENSMUSG00000031799	Tpm4	1824.77	2229.52	3151.82	3328.23	2027.15	3240.02	-1.59847	-0.676695	2.83003e-05	0.000947243
ENSMUSG00000041757	Plekha6	361.175	424.617	607.362	649.387	392.896	628.375	-1.5997	-0.677801	0.000987802	0.0168379
ENSMUSG00000054404	Slfn5	2277.29	2072.09	3350.38	3617.47	2174.69	3483.93	-1.6019	-0.679783	5.07339e-06	0.000211473
ENSMUSG00000025198	Erlin1	345.426	277.165	529.196	468.844	311.296	499.02	-1.60259	-0.680402	0.00280521	0.0386328
ENSMUSG00000038366	Lasp1	2612.22	2178.52	4180.56	3499.32	2395.37	3839.94	-1.603	-0.680775	4.93877e-05	0.00148458
ENSMUSG00000019577	Pdk4	1650.49	1213.98	1823.88	2769.58	1432.24	2296.73	-1.60326	-0.681006	0.00244054	0.0346017
ENSMUSG00000054203	Ifi205	569.061	409.096	793.345	776.051	489.078	784.698	-1.60378	-0.681473	0.00156733	0.0242254
ENSMUSG00000041734	Kirrel	708.701	614.198	1045.81	1077.59	661.45	1061.7	-1.60475	-0.682352	0.000141188	0.00355953
ENSMUSG00000038521	C1s1	2890.45	2381.4	4549.83	3923.73	2635.93	4236.78	-1.60724	-0.684585	3.28426e-05	0.00106507
ENSMUSG00000037321	Tap1	721.3	582.047	990.109	1105.94	651.674	1048.03	-1.60766	-0.684965	0.000352674	0.00731229
ENSMUSG00000017144	Rnd3	332.827	298.23	438.451	577.548	315.528	508	-1.6093	-0.68643	0.00337854	0.0449065
ENSMUSG00000029413	Naaa	821.044	773.845	1248.87	1320.51	797.444	1284.69	-1.61082	-0.687796	3.99712e-05	0.00124958
ENSMUSG00000024079	Eif2ak2	482.967	546.57	652.286	1010.47	514.768	831.379	-1.61489	-0.691439	0.00361013	0.0469467
ENSMUSG00000032280	Tle3	1654.69	1338.15	2711.57	2122.09	1496.42	2416.83	-1.61499	-0.691525	0.000207367	0.00475272
ENSMUSG00000040950	Mgl2	675.104	580.938	1105.11	926.345	628.021	1015.73	-1.61723	-0.693521	0.000305372	0.00645036
ENSMUSG00000028871	Rspo1	488.216	430.16	801.431	686.252	459.188	743.841	-1.61979	-0.695803	0.000530802	0.0100814
ENSMUSG00000035202	Lars2	3577.1	6183	8643.24	7172.56	4880.05	7907.9	-1.62058	-0.696508	0.00201599	0.0297283
ENSMUSG00000055980	Irs1	1223.17	1138.59	2061.08	1767.62	1180.88	1914.35	-1.62113	-0.696999	2.59125e-05	0.000876707
ENSMUSG00000036948	Trappc14	253.033	237.253	395.325	400.786	245.143	398.055	-1.6235	-0.69911	0.00228728	0.0328607
ENSMUSG00000022488	Nckap1l	374.824	344.794	621.738	547.3	359.809	584.519	-1.62448	-0.699974	0.000794064	0.0139775
ENSMUSG00000031557	Plekha2	286.63	317.077	504.039	476.406	301.854	490.223	-1.62448	-0.69998	0.00122408	0.0198895
ENSMUSG00000024538	Ppic	339.127	410.205	566.932	650.332	374.666	608.632	-1.6248	-0.700259	0.00111234	0.0184445
ENSMUSG00000019889	Ptprk	249.883	273.839	437.553	414.02	261.861	425.786	-1.62643	-0.701711	0.00190187	0.0283125
ENSMUSG00000069516	Lyz2	6358.36	4405.82	9516.54	7995.87	5382.09	8756.21	-1.62685	-0.702078	0.000234508	0.00526666
ENSMUSG00000047793	Sned1	652.005	890.255	1468.99	1043.56	771.13	1256.27	-1.62973	-0.704636	0.00178055	0.0268387
ENSMUSG00000020380	Rad50	341.227	314.86	468.1	602.125	328.043	535.112	-1.63062	-0.705424	0.00189174	0.0282694
ENSMUSG00000032434	Cmtm6	1923.47	1864.77	3209.32	2970.92	1894.12	3090.12	-1.63144	-0.706145	1.609e-06	7.95895e-05
ENSMUSG00000029009	Mthfr	551.212	627.502	858.933	1069.08	589.357	964.006	-1.63573	-0.709934	0.000329993	0.00692364
ENSMUSG00000031342	Gpm6b	278.231	297.121	458.217	483.023	287.676	470.62	-1.63607	-0.710236	0.00111392	0.0184445
ENSMUSG00000059326	Csf2ra	323.378	328.164	562.439	503.819	325.771	533.129	-1.63676	-0.710839	0.000769229	0.0136479
ENSMUSG00000032359	Ctsh	786.396	621.959	1209.33	1097.44	704.177	1153.38	-1.63757	-0.711552	0.000188164	0.00444289
ENSMUSG00000022906	Parp9	632.057	502.223	778.071	1081.37	567.14	929.719	-1.63863	-0.712488	0.00143305	0.0226734
ENSMUSG00000039286	Fndc3b	1543.39	1597.58	2458.2	2693.96	1570.49	2576.08	-1.64029	-0.713953	2.4942e-06	0.000114667
ENSMUSG00000034842	Art3	2222.7	1697.36	2713.36	3723.34	1960.03	3218.35	-1.64173	-0.715213	0.00035413	0.00731229
ENSMUSG00000028108	Ecm1	1420.55	988.926	2018.85	1940.6	1204.74	1979.73	-1.64292	-0.716262	0.000262844	0.00568783
ENSMUSG00000023885	Thbs2	703.452	668.523	928.115	1328.08	685.987	1128.1	-1.64411	-0.717311	0.000669153	0.0122048
ENSMUSG00000027574	Nkain4	288.73	223.95	451.928	391.334	256.34	421.631	-1.64425	-0.717428	0.00333325	0.0443799
ENSMUSG00000021998	Lcp1	873.54	781.606	1337.81	1387.63	827.573	1362.72	-1.64638	-0.719294	1.96574e-05	0.000695168
ENSMUSG00000030707	Coro1a	488.216	427.943	844.557	664.511	458.08	754.534	-1.64714	-0.719967	0.00063383	0.0117109
ENSMUSG00000030116	Mfap5	748.599	548.787	1014.37	1128.63	648.693	1071.5	-1.65112	-0.723447	0.000409283	0.00821651
ENSMUSG00000021268	Meg3	519.714	720.63	1046.71	1004.8	620.172	1025.76	-1.65464	-0.726514	0.000422714	0.00841713
ENSMUSG00000017493	Igfbp4	6447.61	5031.1	9691.74	9307.88	5739.36	9499.81	-1.65513	-0.726943	6.09537e-06	0.000248116
ENSMUSG00000031489	Adrb3	8145.34	5681.89	11400.6	11530.2	6913.61	11465.4	-1.6583	-0.729704	5.39965e-05	0.00158949
ENSMUSG00000040710	St8sia4	320.228	243.905	468.999	468.844	282.067	468.922	-1.66159	-0.732569	0.00178621	0.0268859
ENSMUSG00000021732	Fgf10	986.932	1120.86	1690.01	1812.05	1053.89	1751.03	-1.66165	-0.732613	8.54539e-06	0.0003331
ENSMUSG00000031538	Plat	603.709	374.727	849.05	777.941	489.218	813.495	-1.66211	-0.733013	0.00237978	0.0339092
ENSMUSG00000032740	Ccdc88a	255.132	277.165	449.233	435.76	266.149	442.497	-1.66295	-0.733749	0.000993933	0.0169055
ENSMUSG00000032334	Loxl1	1445.75	1165.2	2329.72	2016.22	1305.48	2172.97	-1.66433	-0.734938	3.1649e-05	0.00103712
ENSMUSG00000041779	Tram2	207.886	281.6	416.888	397.95	244.743	407.419	-1.66574	-0.736164	0.00303897	0.0411273
ENSMUSG00000026623	Lpgat1	2800.16	4250.61	5519.27	6227.31	3525.38	5873.29	-1.66613	-0.736502	0.000205414	0.00472181
ENSMUSG00000033066	Gas7	360.125	394.683	764.594	494.366	377.404	629.48	-1.66858	-0.738617	0.00292245	0.0398959
ENSMUSG00000020473	Aebp1	3829.09	3335.96	6453.68	5504.19	3582.52	5978.93	-1.66888	-0.738882	2.3536e-06	0.000108522
ENSMUSG00000022098	Bmp1	637.306	727.282	1221.01	1055.84	682.294	1138.43	-1.66898	-0.738962	5.74916e-05	0.00168602
ENSMUSG00000061451	Tmem151a	247.783	276.057	440.248	433.87	261.92	437.059	-1.6691	-0.739072	0.00101424	0.0171576
ENSMUSG00000030495	Slc7a10	1427.9	1150.79	1925.41	2388.65	1289.35	2157.03	-1.6726	-0.742091	5.96685e-05	0.0017336
ENSMUSG00000060935	Tmem263	289.78	237.253	412.396	470.735	263.517	441.565	-1.67476	-0.743957	0.00159473	0.024583
ENSMUSG00000041577	Prelp	2084.11	1773.86	3038.61	3433.15	1928.98	3235.88	-1.67728	-0.746127	3.71416e-06	0.000162167
ENSMUSG00000022203	Efs	181.638	231.71	333.331	360.14	206.674	346.736	-1.67844	-0.747119	0.00338833	0.0449376
ENSMUSG00000016918	Sulf1	603.709	640.806	927.216	1163.6	622.257	1045.41	-1.67991	-0.748387	0.000102282	0.00272364
ENSMUSG00000075602	Ly6a	1486.7	1483.39	1866.11	3128.78	1485.04	2497.45	-1.68156	-0.749804	0.000803905	0.0141189
ENSMUSG00000074151	Nlrc5	520.764	545.461	825.69	968.882	533.113	897.286	-1.68302	-0.751052	7.49054e-05	0.00207597
ENSMUSG00000034663	Bmp2k	313.928	350.337	566.033	553.917	332.133	559.975	-1.68641	-0.753957	0.000301359	0.00638285
ENSMUSG00000031517	Gpm6a	690.853	557.657	1016.16	1090.82	624.255	1053.49	-1.68704	-0.754497	7.02053e-05	0.00196663
ENSMUSG00000038642	Ctss	574.311	435.704	851.745	853.561	505.007	852.653	-1.68774	-0.755096	0.000224771	0.00506984
ENSMUSG00000037731	Themis2	229.934	200.668	374.66	352.578	215.301	363.619	-1.68848	-0.755724	0.00180215	0.0270599
ENSMUSG00000024542	Cep192	266.682	297.121	441.146	511.381	281.901	476.263	-1.68958	-0.756667	0.000787081	0.0139015
ENSMUSG00000058056	Palld	851.491	1109.77	1881.39	1432.05	980.631	1656.72	-1.68994	-0.75697	0.000204801	0.00472159
ENSMUSG00000035863	Palm	710.801	885.82	1349.49	1348.87	798.311	1349.18	-1.69047	-0.757427	2.87015e-05	0.000954537
ENSMUSG00000055172	C1ra	1341.81	1064.31	2206.63	1864.98	1203.06	2035.8	-1.692	-0.758727	3.23151e-05	0.00105014
ENSMUSG00000109564	Muc16	621.557	583.156	1000.89	1038.83	602.356	1019.86	-1.6929	-0.759494	1.62969e-05	0.000587894
ENSMUSG00000042985	Upk3b	2699.36	2211.78	4282.98	4042.84	2455.57	4162.91	-1.69515	-0.761413	1.67524e-06	8.23448e-05
ENSMUSG00000049103	Ccr2	492.416	446.79	956.865	635.208	469.603	796.037	-1.69533	-0.761563	0.00113503	0.0187742
ENSMUSG00000028581	Laptm5	1017.38	828.17	1619.03	1511.46	922.775	1565.24	-1.69593	-0.762081	1.63231e-05	0.000587894
ENSMUSG00000018774	Cd68	313.928	235.036	397.122	535.012	274.482	466.067	-1.69679	-0.762805	0.00310427	0.0417221
ENSMUSG00000040339	Fam102b	1281.96	1188.48	2206.63	1985.97	1235.22	2096.3	-1.69706	-0.76304	1.64183e-06	8.09573e-05
ENSMUSG00000025492	Ifitm3	1860.47	1678.51	2172.49	3835.83	1769.49	3004.16	-1.69756	-0.763459	0.00107308	0.0179394
ENSMUSG00000070436	Serpinh1	5252.79	7747.32	12682.7	9399.57	6500.06	11041.2	-1.69872	-0.76445	0.000223901	0.00505751
ENSMUSG00000020143	Dock2	362.225	247.231	593.885	442.377	304.728	518.131	-1.69975	-0.765319	0.00356736	0.0465843
ENSMUSG00000038623	Tm6sf1	259.332	196.233	401.614	373.374	227.783	387.494	-1.70032	-0.765804	0.00222596	0.0322166
ENSMUSG00000006360	Crip1	685.603	694.022	1280.31	1069.08	689.812	1174.7	-1.70315	-0.768202	2.29012e-05	0.000797258
ENSMUSG00000052684	Jun	792.696	707.326	1435.75	1120.12	750.011	1277.93	-1.7039	-0.768841	6.27432e-05	0.00180948
ENSMUSG00000022894	Adamts5	1314.51	2032.18	2794.23	2908.54	1673.34	2851.38	-1.7043	-0.769183	0.000177033	0.0042265
ENSMUSG00000025887	Casp12	314.978	304.882	481.577	575.658	309.93	528.617	-1.70519	-0.769933	0.000441988	0.00870114
ENSMUSG00000060802	B2m	22025.4	19765.2	27553.2	43797.2	20895.3	35675.2	-1.70731	-0.771728	0.000131304	0.00334815
ENSMUSG00000076431	Sox4	364.325	356.989	614.55	618.194	360.657	616.372	-1.70894	-0.773106	0.000108318	0.00284559
ENSMUSG00000023046	Igfbp6	3410.17	2605.35	5615.41	4667.65	3007.76	5141.53	-1.70932	-0.773425	1.47715e-05	0.000540732
ENSMUSG00000027962	Vcam1	328.627	258.318	498.648	505.709	293.473	502.179	-1.71034	-0.774283	0.000656821	0.0120361
ENSMUSG00000021390	Ogn	2427.43	2056.57	3867.89	3817.87	2242	3842.88	-1.71389	-0.777271	4.2324e-07	2.45935e-05
ENSMUSG00000033436	Armcx2	175.338	181.82	319.854	294.918	178.579	307.386	-1.72162	-0.783769	0.00208815	0.030619
ENSMUSG00000062980	Cped1	1897.22	2188.5	3389.91	3656.23	2042.86	3523.07	-1.72469	-0.78634	3.42629e-07	2.03898e-05
ENSMUSG00000027078	Ube2l6	383.224	311.534	493.257	706.102	347.379	599.68	-1.72537	-0.786903	0.00132728	0.0211917
ENSMUSG00000049382	Krt8	170.088	172.951	333.331	258.999	171.52	296.165	-1.72728	-0.788504	0.00366735	0.0475326
ENSMUSG00000013584	Aldh1a2	271.931	227.276	498.648	363.921	249.603	431.285	-1.7278	-0.78894	0.00204442	0.0300624
ENSMUSG00000031112	Stk26	211.036	187.364	306.377	382.826	199.2	344.602	-1.72905	-0.78998	0.00218552	0.0317785
ENSMUSG00000004730	Adgre1	589.01	422.4	1002.69	746.748	505.705	874.718	-1.72935	-0.790226	0.000712144	0.0128391
ENSMUSG00000079037	Prnp	3567.65	2739.5	4875.07	6035.42	3153.58	5455.25	-1.72968	-0.790501	1.21672e-05	0.000458277
ENSMUSG00000002831	Plin4	17908.6	14625.5	27493.9	28868	16267	28180.9	-1.73236	-0.792741	1.30404e-07	8.45787e-06
ENSMUSG00000020733	Slc9a3r1	509.215	566.526	941.592	922.564	537.87	932.078	-1.73324	-0.79347	1.37742e-05	0.000511245
ENSMUSG00000052557	Gan	484.017	392.466	886.785	637.099	438.241	761.942	-1.73852	-0.797861	0.000532556	0.0101024
ENSMUSG00000058715	Fcer1g	305.529	270.513	461.811	543.519	288.021	502.665	-1.74453	-0.802835	0.000355512	0.00732678
ENSMUSG00000027951	Adar	436.77	329.272	584.901	754.31	383.021	669.605	-1.74722	-0.805059	0.000559987	0.0104581
ENSMUSG00000025780	Itih5	2992.29	3904.7	5539.94	6530.74	3448.5	6035.34	-1.75023	-0.807544	3.86296e-06	0.000167842
ENSMUSG00000061100	Retnla	3445.86	1995.59	5035.9	4528.7	2720.73	4782.3	-1.75754	-0.813556	0.000280484	0.00602232
ENSMUSG00000054619	Mettl7a1	5280.09	3506.69	7532.73	7912.69	4393.39	7722.71	-1.75766	-0.813658	2.38329e-05	0.000820556
ENSMUSG00000021270	Hsp90aa1	3241.13	3172.99	6435.71	4850.08	3207.06	5642.89	-1.75959	-0.815236	1.68727e-06	8.26761e-05
ENSMUSG00000019916	P4ha1	591.109	568.743	1156.32	885.7	579.926	1021.01	-1.76079	-0.816222	4.30495e-05	0.00132723
ENSMUSG00000050288	Fzd2	219.435	211.754	436.654	324.221	215.595	380.438	-1.76499	-0.819663	0.00143458	0.0226734
ENSMUSG00000025268	Maged2	297.13	380.271	633.418	565.26	338.7	599.339	-1.77047	-0.824131	0.000203723	0.00470859
ENSMUSG00000053398	Phgdh	1774.38	1712.88	2914.62	3263.95	1743.63	3089.29	-1.77164	-0.825084	4.88376e-08	3.43865e-06
ENSMUSG00000029185	Fam114a1	370.625	364.749	694.514	610.632	367.687	652.573	-1.77497	-0.827791	4.47733e-05	0.00136423
ENSMUSG00000046879	Irgm1	409.472	371.401	524.704	863.014	390.437	693.859	-1.77646	-0.829005	0.00122037	0.0198497
ENSMUSG00000045827	Serpinb9	507.115	537.701	957.764	898.933	522.408	928.349	-1.77733	-0.82971	5.06959e-06	0.000211473
ENSMUSG00000026896	Ifih1	514.465	503.332	752.914	1059.63	508.898	906.27	-1.78044	-0.832236	0.000118018	0.00304916
ENSMUSG00000001128	Cfp	781.146	539.918	1201.25	1155.1	660.532	1178.17	-1.78303	-0.834334	6.97062e-05	0.00195615
ENSMUSG00000018008	Cyth4	383.224	355.88	711.584	606.851	369.552	659.218	-1.78384	-0.834984	5.30798e-05	0.00157138
ENSMUSG00000026574	Dpt	2349.74	2753.91	4357.56	4752.72	2551.83	4555.14	-1.78516	-0.83605	5.94328e-08	4.1106e-06
ENSMUSG00000031274	Col4a5	209.986	156.321	337.823	316.659	183.153	327.241	-1.78566	-0.836456	0.0017186	0.0260052
ENSMUSG00000017929	B4galt5	194.237	291.578	445.639	423.472	242.907	434.555	-1.79034	-0.840237	0.0012402	0.0200678
ENSMUSG00000020580	Rock2	2254.2	2395.82	4068.25	4263.08	2325.01	4165.67	-1.79172	-0.841349	3.99571e-09	3.61023e-07
ENSMUSG00000043895	S1pr2	182.687	179.603	362.081	289.247	181.145	325.664	-1.7982	-0.84655	0.00120962	0.0197159
ENSMUSG00000032596	Uba7	499.766	443.464	744.828	951.867	471.615	848.347	-1.7982	-0.846551	4.43904e-05	0.00135786
ENSMUSG00000032231	Anxa2	2747.66	4209.59	5689.08	6874.81	3478.62	6281.94	-1.806	-0.852796	3.09529e-05	0.00101849
ENSMUSG00000036298	Slc2a13	225.734	320.403	543.571	442.377	273.069	492.974	-1.80666	-0.853328	0.00075915	0.013546
ENSMUSG00000031502	Col4a1	10733.4	9409.21	18373.6	18038.2	10071.3	18205.9	-1.80767	-0.854128	8.92534e-10	9.42648e-08
ENSMUSG00000029298	Gbp9	640.456	526.614	935.302	1180.62	583.535	1057.96	-1.81234	-0.857856	2.49285e-05	0.000852641
ENSMUSG00000033453	Adamts15	242.533	290.469	548.064	417.801	266.501	482.932	-1.81315	-0.858501	0.00043947	0.00868439
ENSMUSG00000022665	Ccdc80	7135.31	7473.48	13193.1	13327.1	7304.4	13260.1	-1.81537	-0.860266	7.24504e-11	8.98788e-09
ENSMUSG00000040605	Bace2	140.69	203.994	340.518	286.411	172.342	313.465	-1.82057	-0.864387	0.00243661	0.0345927
ENSMUSG00000037820	Tgm2	2908.3	3065.45	5737.6	5141.22	2986.87	5439.41	-1.82119	-0.864884	2.2989e-09	2.1825e-07
ENSMUSG00000052397	Ezr	359.075	441.247	804.126	656.004	400.161	730.065	-1.8253	-0.86813	5.82464e-05	0.00170177
ENSMUSG00000028583	Pdpn	229.934	246.123	448.334	421.582	238.028	434.958	-1.82776	-0.870075	0.000131023	0.00334644
ENSMUSG00000024053	Emilin2	776.947	748.346	1576.81	1210.87	762.646	1393.84	-1.82779	-0.870104	4.51685e-06	0.000191336
ENSMUSG00000051906	Cd209f	508.165	526.614	1061.99	828.985	517.39	945.485	-1.82781	-0.870113	1.38024e-05	0.000511245
ENSMUSG00000039982	Dtx4	573.261	1147.46	1427.66	1722.25	860.362	1574.95	-1.83109	-0.872702	0.00120682	0.0196908
ENSMUSG00000020467	Efemp1	2459.98	2000.02	4012.55	4168.55	2230	4090.55	-1.83411	-0.875079	4.46608e-08	3.2069e-06
ENSMUSG00000039787	Cercam	148.04	185.146	292.9	318.549	166.593	305.725	-1.83598	-0.876547	0.00104691	0.017596
ENSMUSG00000057335	Cep170	767.497	725.064	1333.32	1407.48	746.281	1370.4	-1.83609	-0.876639	1.5319e-07	9.73377e-06
ENSMUSG00000014599	Csf1	603.709	623.068	1168	1085.15	613.388	1126.58	-1.83684	-0.877224	4.769e-07	2.7406e-05
ENSMUSG00000029335	Bmp3	379.024	238.362	507.633	627.646	308.693	567.64	-1.83744	-0.877695	0.000852272	0.0148848
ENSMUSG00000001119	Col6a1	3270.53	4413.58	6836.42	7314.35	3842.05	7075.39	-1.84169	-0.881034	3.38864e-07	2.02942e-05
ENSMUSG00000020437	Myo1g	153.289	171.842	333.331	265.615	162.566	299.473	-1.84315	-0.882173	0.00121477	0.0197793
ENSMUSG00000032009	Sesn3	732.85	789.367	1426.76	1381.96	761.108	1404.36	-1.84538	-0.88392	1.07337e-07	7.1395e-06
ENSMUSG00000028780	Sema3c	1070.93	1090.92	2002.68	1988.81	1080.92	1995.74	-1.84638	-0.884697	8.79036e-09	7.4675e-07
ENSMUSG00000046805	Mpeg1	747.549	497.789	1257.85	1045.45	622.669	1151.65	-1.84898	-0.886728	8.07797e-05	0.00221133
ENSMUSG00000027646	Src	180.588	188.472	359.386	323.276	184.53	341.331	-1.85017	-0.887657	0.000369595	0.00753212
ENSMUSG00000071984	Fndc1	1295.61	1161.88	2442.03	2105.07	1228.74	2273.55	-1.85023	-0.887708	7.72104e-08	5.24728e-06
ENSMUSG00000012428	Steap4	5935.24	5327.12	9703.42	11157.7	5631.18	10430.6	-1.85221	-0.889251	1.87547e-09	1.84374e-07
ENSMUSG00000111840	Gm48832	202.636	213.972	402.512	371.483	208.304	386.998	-1.85828	-0.893966	0.000168952	0.00410075
ENSMUSG00000036098	Myrf	566.961	503.332	1067.38	923.51	535.147	995.443	-1.85998	-0.895287	2.23893e-06	0.000104468
ENSMUSG00000035697	Arhgap45	485.067	381.379	935.302	676.799	433.223	806.051	-1.86036	-0.895585	0.000105787	0.00280235
ENSMUSG00000079523	Tmsb10	611.058	534.375	1338.71	807.244	572.716	1072.98	-1.87363	-0.905836	0.000207151	0.00475272
ENSMUSG00000028497	Hacd4	325.478	321.512	646.895	565.26	323.495	606.077	-1.87373	-0.90591	1.4559e-05	0.000534204
ENSMUSG00000031740	Mmp2	938.636	1150.79	1999.09	1918.86	1044.71	1958.97	-1.87554	-0.907303	1.13949e-07	7.51532e-06
ENSMUSG00000047414	Flrt2	459.868	454.551	973.936	742.022	457.21	857.979	-1.87687	-0.908325	1.25423e-05	0.000471269
ENSMUSG00000036782	Klhl13	365.375	433.486	742.132	757.146	399.431	749.639	-1.87733	-0.908682	5.28841e-06	0.000219266
ENSMUSG00000018339	Gpx3	16954.2	15948.1	32325.9	29453.1	16451.2	30889.5	-1.87764	-0.908923	1.9815e-11	2.86786e-09
ENSMUSG00000025083	Afap1l2	196.337	210.646	444.74	323.276	203.491	384.008	-1.88795	-0.916823	0.000472818	0.00920376
ENSMUSG00000024300	Myo1f	209.986	139.691	351.3	311.933	174.838	331.616	-1.89533	-0.92245	0.00114148	0.0188411
ENSMUSG00000024713	Pcsk5	435.72	342.576	752.015	727.843	389.148	739.929	-1.90066	-0.926503	8.72439e-06	0.000339231
ENSMUSG00000079227	Ccr5	150.14	152.995	309.97	267.506	151.567	288.738	-1.90546	-0.930137	0.000529222	0.0100636
ENSMUSG00000028270	Gbp2	886.139	971.187	1650.48	1889.56	928.663	1770.02	-1.90606	-0.93059	3.22622e-08	2.39e-06
ENSMUSG00000067212	H2-T23	1482.5	1141.92	1844.55	3160.92	1312.21	2502.73	-1.9069	-0.931229	0.000108229	0.00284559
ENSMUSG00000029718	Pcolce	582.71	770.519	1278.52	1303.5	676.615	1291.01	-1.90865	-0.932554	1.28257e-06	6.48799e-05
ENSMUSG00000044288	Cnr1	177.438	107.54	265.946	278.849	142.489	272.397	-1.90964	-0.933297	0.00269503	0.0373001
ENSMUSG00000024590	Lmnb1	136.491	133.039	255.164	259.944	134.765	257.554	-1.91095	-0.93429	0.000692655	0.0125602
ENSMUSG00000026872	Zeb2	2622.72	2888.06	5233.56	5326.49	2755.39	5280.02	-1.91634	-0.938357	4.49773e-11	5.76262e-09
ENSMUSG00000022371	Col14a1	710.801	1011.1	1673.84	1640.95	860.95	1657.4	-1.92569	-0.945374	1.94174e-06	9.22532e-05
ENSMUSG00000034361	Cpne2	446.219	382.488	840.065	757.146	414.354	798.605	-1.92698	-0.946342	1.95034e-06	9.23812e-05
ENSMUSG00000040253	Gbp7	615.258	582.047	990.109	1319.57	598.652	1154.84	-1.92864	-0.947581	2.26431e-06	0.000105338
ENSMUSG00000058571	Gpc6	108.143	101.997	226.413	179.598	105.07	203.005	-1.93236	-0.950367	0.00252892	0.0355005
ENSMUSG00000002489	Tiam1	116.542	119.735	245.281	211.736	118.139	228.509	-1.93476	-0.952155	0.00120267	0.0196438
ENSMUSG00000106734	Gm20559	291.88	292.687	425.873	706.102	292.283	565.987	-1.93585	-0.952967	0.000373434	0.00759058
ENSMUSG00000105504	Gbp5	246.733	220.624	424.974	482.078	233.678	453.526	-1.94005	-0.956096	3.64184e-05	0.00115468
ENSMUSG00000021356	Irf4	503.965	396.901	748.422	1002.91	450.433	875.666	-1.94312	-0.958378	1.85356e-05	0.000658476
ENSMUSG00000069874	Irgm2	751.748	621.959	1153.63	1526.58	686.854	1340.1	-1.95044	-0.963803	2.09111e-06	9.80847e-05
ENSMUSG00000024165	Jpt2	215.235	272.731	477.085	475.461	243.983	476.273	-1.95309	-0.965759	3.57907e-05	0.00114027
ENSMUSG00000026430	Rassf5	97.6433	109.757	227.312	177.707	103.7	202.509	-1.95406	-0.966476	0.00240295	0.0342081
ENSMUSG00000022816	Fstl1	2447.38	2635.29	5218.29	4728.14	2541.33	4973.21	-1.95706	-0.968685	3.33136e-11	4.45064e-09
ENSMUSG00000056481	Cd248	934.436	1228.4	2433.04	1801.65	1081.42	2117.35	-1.95845	-0.969714	2.30067e-06	0.000106504
ENSMUSG00000005087	Cd44	281.381	334.816	690.021	517.052	308.098	603.537	-1.95993	-0.970799	3.59113e-05	0.00114091
ENSMUSG00000004473	Clec11a	97.6433	108.649	224.616	180.543	103.146	202.58	-1.96514	-0.974634	0.00203285	0.0299389
ENSMUSG00000034641	Cd300ld	129.141	96.4535	207.545	236.313	112.797	221.929	-1.96568	-0.975032	0.00169372	0.0257785
ENSMUSG00000038587	Akap12	1285.11	1370.31	3014.35	2215.67	1327.71	2615.01	-1.96982	-0.97806	1.28251e-07	8.3529e-06
ENSMUSG00000018507	Trpv2	134.391	116.409	290.204	204.174	125.4	247.189	-1.97127	-0.979123	0.00156089	0.0241621
ENSMUSG00000018593	Sparc	14141.5	14717.5	27741.9	29231.9	14429.5	28486.9	-1.97422	-0.981283	7.03814e-14	1.61784e-11
ENSMUSG00000040690	Col16a1	183.737	243.905	415.091	430.089	213.821	422.59	-1.97754	-0.983703	7.22414e-05	0.00201284
ENSMUSG00000019124	Scrn1	235.184	215.08	507.633	384.717	225.132	446.175	-1.98197	-0.986936	6.85025e-05	0.00193278
ENSMUSG00000034330	Plcg2	97.6433	93.1275	199.459	178.652	95.3854	189.056	-1.98204	-0.986986	0.00183242	0.0274617
ENSMUSG00000020027	Socs2	275.081	333.707	574.119	632.373	304.394	603.246	-1.9824	-0.987247	5.5791e-06	0.000230097
ENSMUSG00000038807	Rap1gap2	174.288	250.557	404.309	438.596	212.423	421.453	-1.98534	-0.989389	0.000136485	0.00347028
ENSMUSG00000021614	Vcan	239.384	360.315	574.119	617.249	299.849	595.684	-1.98782	-0.99119	5.27349e-05	0.00156516
ENSMUSG00000002265	Peg3	886.139	503.332	1212.03	1553.05	694.736	1382.54	-1.98914	-0.992148	9.06456e-05	0.00245496
ENSMUSG00000041859	Mcm3	104.993	98.6708	185.982	219.298	101.832	202.64	-1.98916	-0.992158	0.00144017	0.0227388
ENSMUSG00000031432	Prps1	625.757	579.83	1148.24	1256.24	602.793	1202.24	-1.99408	-0.995725	1.49038e-08	1.18255e-06
ENSMUSG00000029659	Medag	248.833	245.014	507.633	478.297	246.923	492.965	-1.99648	-0.997459	5.73021e-06	0.000235089
ENSMUSG00000028480	Glipr2	180.588	180.712	416.888	304.371	180.65	360.629	-1.99691	-0.997771	0.000192565	0.00450597
ENSMUSG00000032609	Klhdc8b	182.687	175.168	349.503	365.812	178.928	357.657	-1.99856	-0.998959	4.76536e-05	0.00144076
ENSMUSG00000034422	Parp14	992.182	864.756	1604.66	2110.74	928.469	1857.7	-2.00038	-1.00027	1.41302e-07	9.08929e-06
ENSMUSG00000026395	Ptprc	592.159	502.223	1247.97	952.813	547.191	1100.39	-2.01085	-1.0078	9.95305e-07	5.23825e-05
ENSMUSG00000042331	Specc1	88.1939	69.8456	167.115	151.24	79.0198	159.177	-2.01327	-1.00954	0.00370737	0.0478134
ENSMUSG00000073489	Ifi204	553.312	380.271	864.324	1017.09	466.791	940.707	-2.01415	-1.01017	7.34895e-06	0.000291552
ENSMUSG00000037362	Ccn3	128.091	141.909	277.626	267.506	135	272.566	-2.01969	-1.01413	0.000213254	0.0048805
ENSMUSG00000002325	Irf9	373.774	382.488	527.399	1007.64	378.131	767.518	-2.02929	-1.02098	0.000282061	0.00604497
ENSMUSG00000020695	Mrc2	341.227	386.923	805.923	676.799	364.075	741.361	-2.03705	-1.02648	7.69789e-07	4.17798e-05
ENSMUSG00000031283	Chrdl1	2360.24	1376.96	3511.2	4103.33	1868.6	3807.27	-2.03712	-1.02653	6.16058e-06	0.000249472
ENSMUSG00000097451	Rian	245.683	399.118	664.864	648.442	322.401	656.653	-2.03819	-1.02729	4.7255e-05	0.00143148
ENSMUSG00000020241	Col6a2	2524.03	3733.97	6261.4	6497.65	3129	6379.53	-2.03904	-1.02789	6.37517e-08	4.37062e-06
ENSMUSG00000057596	Trim30d	137.541	156.321	216.53	382.826	146.931	299.678	-2.03917	-1.02798	0.00158482	0.0244544
ENSMUSG00000037649	H2-DMa	215.235	208.428	530.993	334.619	211.832	432.806	-2.04374	-1.03122	0.000203936	0.00470859
ENSMUSG00000024610	Cd74	7156.31	6248.41	15851.6	11550	6702.36	13700.8	-2.04417	-1.03152	6.39505e-09	5.61579e-07
ENSMUSG00000026837	Col5a1	1518.2	2166.32	3960.43	3570.21	1842.26	3765.32	-2.04423	-1.03156	5.51502e-08	3.84845e-06
ENSMUSG00000036585	Fgf1	1506.65	1639.71	3250.65	3188.33	1573.18	3219.49	-2.04665	-1.03327	3.13963e-12	5.39293e-10
ENSMUSG00000078921	Tgtp2	141.74	125.279	247.976	299.644	133.509	273.81	-2.04973	-1.03543	0.000249358	0.00550525
ENSMUSG00000067787	Blcap	1138.12	966.752	2135.65	2179.75	1052.44	2157.7	-2.04982	-1.0355	2.6317e-10	2.97911e-08
ENSMUSG00000026536	Ifi211	120.742	150.778	241.687	315.714	135.76	278.7	-2.05343	-1.03804	0.000412897	0.00825318
ENSMUSG00000095304	Plac9a	983.782	883.603	2181.47	1660.81	933.693	1921.14	-2.05758	-1.04095	2.76454e-08	2.08756e-06
ENSMUSG00000027015	Cybrd1	102.893	191.798	272.235	333.673	147.346	302.954	-2.05804	-1.04127	0.00156843	0.0242254
ENSMUSG00000036395	Glb1l2	3321.97	2786.07	4959.53	7621.55	3054.02	6290.54	-2.05959	-1.04236	3.71381e-07	2.18235e-05
ENSMUSG00000022440	C1qtnf6	116.542	160.756	291.103	280.739	138.649	285.921	-2.06395	-1.04541	0.000258299	0.00562007
ENSMUSG00000031877	Ces2g	195.287	199.559	370.168	447.103	197.423	408.636	-2.06955	-1.04932	1.73087e-05	0.000616293
ENSMUSG00000074785	Plxnc1	86.0941	80.9323	202.155	143.678	83.5132	172.916	-2.07103	-1.05035	0.00266833	0.0370086
ENSMUSG00000026890	Lhx6	87.144	89.8015	173.404	193.776	88.4728	183.59	-2.07498	-1.0531	0.0011117	0.0184445
ENSMUSG00000027230	Creb3l1	188.987	253.883	469.897	448.994	221.435	459.446	-2.07628	-1.054	1.66919e-05	0.000598419
ENSMUSG00000027009	Itga4	254.083	207.32	570.525	388.498	230.701	479.512	-2.07833	-1.05542	7.12087e-05	0.00198761
ENSMUSG00000029641	Rasl11a	148.04	90.9102	248.875	248.601	119.475	248.738	-2.07957	-1.05629	0.00096227	0.0164385
ENSMUSG00000022014	Epsti1	98.6932	72.063	168.013	188.105	85.3781	178.059	-2.08337	-1.05892	0.00190555	0.0283403
ENSMUSG00000031093	Dock11	398.973	407.987	789.751	892.316	403.48	841.034	-2.08433	-1.05959	3.8287e-08	2.82165e-06
ENSMUSG00000026222	Sp100	643.606	803.779	1185.97	1834.73	723.693	1510.35	-2.08709	-1.0615	3.67827e-06	0.000161051
ENSMUSG00000047945	Marcksl1	104.993	126.387	267.743	215.517	115.69	241.63	-2.09018	-1.06363	0.000429179	0.00851332
ENSMUSG00000022803	Popdc2	92.3937	115.301	226.413	207.955	103.847	217.184	-2.09295	-1.06553	0.000551237	0.0104063
ENSMUSG00000026042	Col5a2	1242.06	1420.19	2781.65	2828.19	1331.13	2804.92	-2.10742	-1.07548	4.58183e-12	7.70092e-10
ENSMUSG00000070034	Sp110	135.441	141.909	252.469	332.728	138.675	292.598	-2.10958	-1.07696	0.000146956	0.00366943
ENSMUSG00000015852	Fcrls	422.071	307.099	930.81	611.577	364.585	771.194	-2.11487	-1.08057	2.67416e-05	0.000902802
ENSMUSG00000053835	H2-T24	123.891	159.647	202.155	397.95	141.769	300.053	-2.11644	-1.08164	0.00203411	0.0299389
ENSMUSG00000047528	Flacc1	125.991	175.168	283.017	356.359	150.58	319.688	-2.12418	-1.08691	0.000164797	0.00403121
ENSMUSG00000030830	Itgal	121.792	140.8	347.706	209.846	131.296	278.776	-2.12484	-1.08736	0.000765706	0.0136087
ENSMUSG00000039997	Ifi203	666.704	735.042	1294.69	1685.38	700.873	1490.03	-2.12595	-1.08811	1.42979e-08	1.1461e-06
ENSMUSG00000044734	Serpinb1a	161.689	233.927	469.897	370.538	197.808	420.218	-2.12632	-1.08836	6.5855e-05	0.00187395
ENSMUSG00000040033	Stat2	429.42	527.723	804.126	1233.55	478.572	1018.84	-2.12901	-1.09018	4.67229e-06	0.000197385
ENSMUSG00000041957	Pkp2	553.312	435.704	1028.74	1078.53	494.508	1053.64	-2.12982	-1.09073	2.32512e-08	1.77287e-06
ENSMUSG00000025007	Aldh18a1	98.6932	137.474	256.961	245.765	118.084	251.363	-2.13067	-1.09131	0.000292481	0.00623638
ENSMUSG00000029417	Cxcl9	431.52	315.968	731.351	864.904	373.744	798.127	-2.13422	-1.09371	1.00019e-06	5.2463e-05
ENSMUSG00000091243	Vgll3	191.087	201.776	400.715	438.596	196.432	419.656	-2.13649	-1.09524	3.58803e-06	0.000157985
ENSMUSG00000047735	Samd9l	623.657	653.001	1063.78	1665.53	638.329	1364.66	-2.13761	-1.096	1.13644e-06	5.80514e-05
ENSMUSG00000026077	Npas2	135.441	157.43	303.681	322.33	146.435	313.006	-2.13825	-1.09643	3.52657e-05	0.00112728
ENSMUSG00000063011	Msln	397.923	368.075	752.914	893.262	382.999	823.088	-2.14846	-1.1033	3.845e-08	2.82165e-06
ENSMUSG00000090272	Mndal	428.371	483.376	818.502	1145.64	455.873	982.073	-2.15424	-1.10718	4.04266e-07	2.3667e-05
ENSMUSG00000027322	Siglec1	447.269	410.205	742.132	1112.56	428.737	927.346	-2.16229	-1.11256	1.47273e-06	7.37829e-05
ENSMUSG00000036594	H2-Aa	2589.12	2269.43	5860.69	4661.98	2429.28	5261.33	-2.16576	-1.11487	3.08252e-11	4.18982e-09
ENSMUSG00000022221	Ripk3	58.796	58.759	135.668	119.102	58.7775	127.385	-2.16764	-1.11612	0.00338951	0.0449376
ENSMUSG00000079168	Cd209g	185.837	199.559	491.46	345.016	192.698	418.238	-2.17143	-1.11864	2.50069e-05	0.000853455
ENSMUSG00000026749	Nek6	263.532	331.49	549.861	746.748	297.511	648.304	-2.1795	-1.124	2.92932e-06	0.000131198
ENSMUSG00000020053	Igf1	3305.17	4828.22	8422.21	9317.33	4066.7	8869.77	-2.18123	-1.12514	2.3112e-09	2.1825e-07
ENSMUSG00000021423	Ly86	106.043	115.301	221.022	262.78	110.672	241.901	-2.18583	-1.12818	0.000139371	0.00352509
ENSMUSG00000035403	Crb2	112.342	94.2362	228.21	224.97	103.289	226.59	-2.19262	-1.13265	0.00017161	0.00412682
ENSMUSG00000068227	Il2rb	101.843	76.4976	236.296	155.021	89.1703	195.659	-2.19358	-1.13329	0.00148842	0.0233354
ENSMUSG00000045680	Tcf21	112.342	77.6063	244.383	172.981	94.9743	208.682	-2.196	-1.13488	0.00107908	0.0180026
ENSMUSG00000091345	Col6a5	101.843	98.6708	256.063	184.324	100.257	220.193	-2.19692	-1.13548	0.000409485	0.00821651
ENSMUSG00000069662	Marcks	1446.8	1850.36	3595.66	3652.45	1648.58	3624.05	-2.19863	-1.13661	1.28765e-11	1.93531e-09
ENSMUSG00000037921	Ddx60	166.939	159.647	230.906	487.749	163.293	359.327	-2.19942	-1.13713	0.0009352	0.0160462
ENSMUSG00000020251	Glt8d2	85.0442	58.759	155.434	161.638	71.9016	158.536	-2.20237	-1.13906	0.00167803	0.0255895
ENSMUSG00000036545	Adamts2	1221.07	1398.02	2902.94	2889.63	1309.54	2896.29	-2.21196	-1.14533	1.61919e-13	3.3302e-11
ENSMUSG00000053063	Clec12a	96.5934	68.737	137.465	228.751	82.6652	183.108	-2.21218	-1.14547	0.00261029	0.0363649
ENSMUSG00000079547	H2-DMb1	184.787	191.798	504.937	328.947	188.293	416.942	-2.21524	-1.14746	3.49366e-05	0.00112134
ENSMUSG00000004098	Col5a3	1437.35	2191.82	3897.54	4172.34	1814.59	4034.94	-2.22397	-1.15314	8.58356e-09	7.41269e-07
ENSMUSG00000022840	Adcy5	3357.67	1905.79	6170.66	5542	2631.73	5856.33	-2.22502	-1.15382	3.70521e-07	2.18235e-05
ENSMUSG00000040296	Ddx58	437.82	518.853	834.674	1294.99	478.337	1064.83	-2.22613	-1.15454	1.0706e-06	5.50909e-05
ENSMUSG00000034205	Loxl2	422.071	412.422	1009.87	847.89	417.246	928.882	-2.22641	-1.15472	2.99259e-09	2.76788e-07
ENSMUSG00000047246	H2bc6	116.542	129.713	333.331	214.572	123.128	273.951	-2.22641	-1.15472	0.000251793	0.00553946
ENSMUSG00000020638	Cmpk2	208.936	236.145	371.066	623.865	222.54	497.466	-2.23513	-1.16036	4.23489e-05	0.0013134
ENSMUSG00000048078	Tenm4	2373.89	3209.57	6172.46	6334.12	2791.73	6253.29	-2.24017	-1.16361	1.72257e-11	2.5164e-09
ENSMUSG00000040703	Cyp2s1	180.588	174.06	389.934	405.512	177.324	397.723	-2.24259	-1.16517	1.24397e-06	6.33373e-05
ENSMUSG00000072620	Slfn2	145.94	161.865	302.783	388.498	153.902	345.64	-2.24587	-1.16727	1.45477e-05	0.000534204
ENSMUSG00000026255	Efhd1	131.241	149.669	352.198	279.794	140.455	315.996	-2.25115	-1.17066	2.30143e-05	0.000799415
ENSMUSG00000063286	Gvin-ps7	412.622	352.554	841.862	885.7	382.588	863.781	-2.25694	-1.17437	1.9562e-09	1.89922e-07
ENSMUSG00000045875	Adra1a	148.04	113.083	245.281	345.016	130.562	295.149	-2.25844	-1.17533	0.000111569	0.00290172
ENSMUSG00000006205	Htra1	2075.71	2005.57	4657.64	4596.75	2040.64	4627.2	-2.26748	-1.18109	4.282e-17	1.91234e-14
ENSMUSG00000002847	Pla1a	477.717	340.359	1032.34	824.258	409.038	928.297	-2.26867	-1.18185	2.07765e-07	1.29903e-05
ENSMUSG00000082292	Gm12250	85.0442	55.4331	125.785	193.776	70.2386	159.781	-2.27133	-1.18354	0.00280309	0.0386328
ENSMUSG00000055254	Ntrk2	2642.67	3126.42	6713.33	6422.03	2884.55	6567.68	-2.27704	-1.18716	3.25384e-15	9.59638e-13
ENSMUSG00000026399	Cd55	611.058	824.844	1753.8	1516.18	717.951	1634.99	-2.27816	-1.18787	1.72017e-09	1.70177e-07
ENSMUSG00000022102	Dok2	128.091	127.496	338.721	243.875	127.794	291.298	-2.28018	-1.18915	5.03492e-05	0.0015048
ENSMUSG00000043110	Lrrn4	442.02	548.787	1149.14	1109.72	495.403	1129.43	-2.28067	-1.18946	4.15121e-10	4.53759e-08
ENSMUSG00000070327	Rnf213	1687.23	1932.4	3428.54	4852.92	1809.82	4140.73	-2.28794	-1.19405	4.03184e-10	4.43815e-08
ENSMUSG00000040612	Ildr2	445.169	394.683	1048.51	881.919	419.926	965.214	-2.2983	-1.20057	1.1385e-09	1.17078e-07
ENSMUSG00000047180	Neurl3	143.84	148.561	345.011	335.564	146.2	340.287	-2.32784	-1.21899	1.84689e-06	9.02147e-05
ENSMUSG00000056144	Trim34a	88.1939	89.8015	171.607	242.929	88.9977	207.268	-2.32812	-1.21917	0.000255922	0.00559485
ENSMUSG00000089774	Slc5a3	2131.35	1843.7	4632.49	4638.34	1987.53	4635.42	-2.33202	-1.22158	3.81297e-16	1.49001e-13
ENSMUSG00000078920	Ifi47	184.787	200.668	423.177	478.297	192.727	450.737	-2.33894	-1.22586	2.13462e-07	1.32933e-05
ENSMUSG00000039252	Lgi2	184.787	249.449	550.759	465.063	217.118	507.911	-2.34117	-1.22723	7.52262e-07	4.1114e-05
ENSMUSG00000031673	Cdh11	544.913	463.42	1148.24	1216.54	504.166	1182.39	-2.34449	-1.22928	2.18693e-11	3.10762e-09
ENSMUSG00000026193	Fn1	6292.22	4906.93	15737.5	10536.7	5599.58	13137.1	-2.34606	-1.23024	1.45122e-09	1.45411e-07
ENSMUSG00000037060	Cavin3	1057.28	1429.06	2961.34	2875.45	1243.17	2918.4	-2.34808	-1.23148	9.42545e-12	1.48817e-09
ENSMUSG00000027070	Lrp2	117.592	119.735	249.773	310.987	118.664	280.38	-2.36235	-1.24022	1.49157e-05	0.000544736
ENSMUSG00000028111	Ctsk	91.3437	96.4535	210.241	234.422	93.8986	222.331	-2.36787	-1.24359	4.71899e-05	0.00143148
ENSMUSG00000060586	H2-Eb1	2234.25	1922.42	5507.59	4341.54	2078.33	4924.56	-2.3694	-1.24452	4.49487e-13	8.61311e-11
ENSMUSG00000005952	Trpv1	38.8473	56.5417	107.816	119.102	47.6945	113.459	-2.38149	-1.25187	0.00295615	0.0402857
ENSMUSG00000067158	Col4a4	38.8473	49.8897	96.1358	115.321	44.3685	105.728	-2.3844	-1.25363	0.00350304	0.0460522
ENSMUSG00000023992	Trem2	86.0941	80.9323	196.764	202.284	83.5132	199.524	-2.38855	-1.25613	7.712e-05	0.00212604
ENSMUSG00000001123	Lgals9	646.756	633.045	1055.7	2002.99	639.901	1529.34	-2.38958	-1.25676	1.35833e-06	6.84904e-05
ENSMUSG00000072596	Ear2	83.9942	67.6283	243.484	119.102	75.8113	181.293	-2.39159	-1.25797	0.00211461	0.030949
ENSMUSG00000033763	Mtss2	535.463	509.984	1442.04	1058.68	522.724	1250.36	-2.3922	-1.25834	7.33804e-10	7.80279e-08
ENSMUSG00000079293	Clec7a	101.843	64.3023	170.708	227.805	83.0727	199.257	-2.395	-1.26003	0.000454424	0.0089123
ENSMUSG00000018920	Cxcl16	151.19	158.539	405.208	336.509	154.864	370.858	-2.39552	-1.26034	9.78883e-07	5.19039e-05
ENSMUSG00000027204	Fbn1	2263.64	2759.46	6344.96	5705.53	2511.55	6025.25	-2.39928	-1.2626	2.65434e-15	8.48872e-13
ENSMUSG00000039683	Sdk1	108.143	98.6708	277.626	219.298	103.407	248.462	-2.40276	-1.26469	2.99754e-05	0.000988727
ENSMUSG00000068246	Apol9b	56.6961	54.3244	100.628	167.309	55.5102	133.969	-2.41173	-1.27007	0.00222184	0.0322166
ENSMUSG00000031963	Bmper	78.7446	161.865	300.087	279.794	120.305	289.941	-2.41354	-1.27115	0.000244151	0.00541322
ENSMUSG00000041202	Pla2g2d	142.79	124.17	342.315	302.48	133.48	322.398	-2.41467	-1.27183	2.30301e-06	0.000106504
ENSMUSG00000036446	Lum	985.882	1752.79	3153.61	3490.81	1369.34	3322.21	-2.42666	-1.27897	4.16351e-08	3.01295e-06
ENSMUSG00000022346	Myc	212.085	165.19	424.974	498.147	188.638	461.561	-2.44497	-1.28982	2.38151e-07	1.46557e-05
ENSMUSG00000029661	Col1a2	3424.86	3975.66	9236.22	8906.15	3700.26	9071.19	-2.45165	-1.29375	6.57468e-19	3.95265e-16
ENSMUSG00000034271	Jdp2	218.385	213.972	568.728	496.257	216.178	532.492	-2.4634	-1.30065	7.57864e-09	6.61797e-07
ENSMUSG00000054072	Iigp1	634.156	720.63	1345.9	2014.33	677.393	1680.11	-2.48025	-1.31049	1.31278e-09	1.33247e-07
ENSMUSG00000000682	Cd52	90.2938	70.9543	238.992	162.583	80.6241	200.787	-2.48972	-1.31598	0.000187672	0.00443798
ENSMUSG00000030108	Slc6a13	160.639	202.885	382.746	522.724	181.762	452.735	-2.49149	-1.31701	7.61707e-07	4.14852e-05
ENSMUSG00000083443	Gm15519	90.2938	195.124	298.29	412.129	142.709	355.21	-2.4916	-1.31707	0.000198042	0.00459288
ENSMUSG00000037816	Fbxw17	177.438	298.23	547.165	638.989	237.834	593.077	-2.49557	-1.31937	1.06987e-06	5.50909e-05
ENSMUSG00000029093	Sorcs2	89.2439	165.19	397.122	237.258	127.217	317.19	-2.49671	-1.32003	0.000251025	0.00553424
ENSMUSG00000073421	H2-Ab1	1990.66	1794.92	5407.86	4043.78	1892.79	4725.82	-2.49673	-1.32004	1.10895e-13	2.40749e-11
ENSMUSG00000035279	Ssc5d	130.191	209.537	425.873	425.363	169.864	425.618	-2.50821	-1.32666	1.93449e-06	9.21889e-05
ENSMUSG00000027797	Dclk1	89.2439	181.82	352.198	328.947	135.532	340.573	-2.5163	-1.3313	6.50127e-05	0.00185779
ENSMUSG00000030921	Trim30a	289.78	322.62	499.547	1044.5	306.2	772.024	-2.52096	-1.33398	1.08439e-05	0.000416463
ENSMUSG00000054162	Spock3	64.0456	28.8252	116.8	118.156	46.4354	117.478	-2.52444	-1.33596	0.00388261	0.0498268
ENSMUSG00000001506	Col1a1	3181.28	3859.25	9120.32	8667	3520.27	8893.66	-2.52661	-1.3372	2.24777e-18	1.25682e-15
ENSMUSG00000074345	Tnfaip8l3	39.8973	62.085	150.044	107.759	50.9911	128.901	-2.53228	-1.34044	0.00153805	0.0239455
ENSMUSG00000070348	Ccnd1	132.291	226.167	474.39	433.87	179.229	454.13	-2.5366	-1.3429	2.56476e-06	0.000117222
ENSMUSG00000038179	Slamf7	47.2468	37.6945	125.785	89.7988	42.4706	107.792	-2.53718	-1.34323	0.00228302	0.0328422
ENSMUSG00000022504	Ciita	145.94	127.496	423.177	272.232	136.718	347.705	-2.54334	-1.34672	7.27789e-06	0.000289467
ENSMUSG00000057706	Mex3b	35.6975	50.9984	135.668	86.0178	43.348	110.843	-2.56122	-1.35683	0.0028532	0.0391557
ENSMUSG00000045763	Basp1	75.5948	99.7795	253.367	195.667	87.6871	224.517	-2.56326	-1.35798	3.67923e-05	0.00116182
ENSMUSG00000047787	Flrt1	62.9957	95.3448	238.992	166.364	79.1703	202.678	-2.56379	-1.35828	0.000182655	0.00433902
ENSMUSG00000015947	Fcgr1	60.8958	68.737	146.45	187.16	64.8164	166.805	-2.57376	-1.36388	0.000144672	0.00363378
ENSMUSG00000025610	Map3k7cl	40.9472	48.7811	104.222	126.664	44.8641	115.443	-2.5741	-1.36407	0.00105473	0.0177083
ENSMUSG00000045005	Fzd5	135.441	85.3669	277.626	298.699	110.404	288.162	-2.60673	-1.38224	8.46765e-06	0.000330895
ENSMUSG00000017830	Dhx58	73.495	124.17	163.521	352.578	98.8325	258.05	-2.61223	-1.38528	0.000643288	0.0118576
ENSMUSG00000048126	Col6a3	1865.72	3180.75	7214.68	5978.71	2523.24	6596.69	-2.61474	-1.38667	6.5786e-10	7.09173e-08
ENSMUSG00000030748	Il4ra	870.39	1107.55	2867.9	2318.7	988.971	2593.3	-2.62291	-1.39117	1.15373e-13	2.43701e-11
ENSMUSG00000034438	Gbp8	35.6975	35.4772	107.816	79.401	35.5874	93.6084	-2.6314	-1.39583	0.00254884	0.0357184
ENSMUSG00000090942	F830016B08Rik	74.5449	89.8015	150.044	285.466	82.1732	217.755	-2.64978	-1.40587	0.000220701	0.0050142
ENSMUSG00000015396	Cd83	113.392	87.5842	302.783	245.765	100.488	274.274	-2.72788	-1.44778	1.87828e-06	9.08222e-05
ENSMUSG00000040829	Zmynd15	45.1469	50.9984	144.653	118.156	48.0727	131.405	-2.7354	-1.45175	0.000254383	0.0055768
ENSMUSG00000039518	Cdsn	446.219	544.353	1242.58	1470.81	495.286	1356.69	-2.73984	-1.45409	5.21163e-14	1.25328e-11
ENSMUSG00000068245	Phf11d	152.24	182.929	283.915	635.208	167.584	459.562	-2.74205	-1.45525	2.74276e-05	0.000923968
ENSMUSG00000059901	Adamts14	54.5962	74.2803	176.998	177.707	64.4383	177.352	-2.75519	-1.46215	3.44631e-05	0.00110842
ENSMUSG00000039405	Prss23	477.717	373.619	1203.94	1143.75	425.668	1173.85	-2.75653	-1.46286	7.37664e-14	1.67108e-11
ENSMUSG00000046718	Bst2	526.014	475.616	893.973	1872.54	500.815	1383.26	-2.76138	-1.46539	2.61666e-07	1.59148e-05
ENSMUSG00000091649	Phf11b	49.3466	44.3464	103.323	155.966	46.8465	129.645	-2.7651	-1.46733	0.00045126	0.00886137
ENSMUSG00000026043	Col3a1	10384.8	12443.6	32095	31113.9	11414.2	31604.4	-2.76893	-1.46933	8.59406e-24	1.11945e-20
ENSMUSG00000073418	C4b	4135.67	3109.79	7446.48	12796.8	3622.73	10121.6	-2.79387	-1.48227	0.000603435	0.0112156
ENSMUSG00000028268	Gbp3	374.824	446.79	727.757	1572.9	410.807	1150.33	-2.80006	-1.48546	6.52558e-07	3.5916e-05
ENSMUSG00000021256	Vash1	71.3951	114.192	292.001	227.805	92.7936	259.903	-2.80506	-1.48803	8.32708e-06	0.000327037
ENSMUSG00000029299	Abcg3	37.7974	32.1512	126.684	71.839	34.9743	99.2613	-2.83837	-1.50506	0.00197991	0.0292238
ENSMUSG00000045868	Gvin1	71.3951	90.9102	170.708	290.192	81.1526	230.45	-2.84026	-1.50602	3.22656e-05	0.00105014
ENSMUSG00000036334	Igsf10	121.792	166.299	408.802	410.239	144.045	409.52	-2.84548	-1.50867	9.79003e-09	8.18332e-07
ENSMUSG00000078532	Nkain1	34.6476	60.9764	137.465	135.171	47.812	136.318	-2.85646	-1.51423	0.000288207	0.00616273
ENSMUSG00000032401	Lctl	118.642	144.126	392.629	362.031	131.384	377.33	-2.87395	-1.52303	5.96377e-09	5.26665e-07
ENSMUSG00000073555	Gm4951	150.14	93.1275	263.25	441.432	121.634	352.341	-2.89303	-1.53258	6.64501e-06	0.000265647
ENSMUSG00000079057	Cyp4v3	319.178	403.553	905.653	1185.34	361.365	1045.5	-2.89394	-1.53303	2.65444e-12	4.66197e-10
ENSMUSG00000040483	Xaf1	182.687	192.907	305.478	786.448	187.797	545.963	-2.90648	-1.53927	1.99129e-05	0.000702614
ENSMUSG00000031451	Gas6	5932.09	6348.19	21408.6	14720.4	6140.14	18064.5	-2.94211	-1.55685	3.1646e-17	1.49896e-14
ENSMUSG00000078606	Gvin2	103.943	82.0409	185.084	374.319	92.9919	279.702	-3.00487	-1.5873	2.04661e-05	0.000720508
ENSMUSG00000024371	C2	452.519	344.794	1002.69	1396.13	398.656	1199.41	-3.00707	-1.58836	2.81109e-12	4.88225e-10
ENSMUSG00000032690	Oas2	177.438	226.167	396.223	832.766	201.802	614.494	-3.04521	-1.60654	7.05595e-07	3.86988e-05
ENSMUSG00000029798	Herc6	118.642	120.844	250.672	479.242	119.743	364.957	-3.04675	-1.60727	1.55658e-06	7.72408e-05
ENSMUSG00000034028	Cd226	46.1968	27.7165	147.348	79.401	36.9567	113.375	-3.06478	-1.61578	0.00103937	0.0175143
ENSMUSG00000026387	Sctr	48.2967	52.1071	163.521	144.623	50.2019	154.072	-3.07045	-1.61845	1.43231e-05	0.000528029
ENSMUSG00000031253	Srpx2	88.1939	76.4976	217.429	289.247	82.3458	253.338	-3.07414	-1.62018	3.6627e-07	2.16862e-05
ENSMUSG00000029633	Gm5578	25.1983	50.9984	94.3388	139.897	38.0983	117.118	-3.07956	-1.62272	0.000729182	0.0130709
ENSMUSG00000081189	Hspd1-ps4	211.036	278.274	702.6	806.299	244.655	754.449	-3.0854	-1.62546	5.4753e-13	1.01886e-10
ENSMUSG00000112246	Gm40761	34.6476	17.7386	102.425	59.5508	26.1931	80.9879	-3.08695	-1.62618	0.00363085	0.0471769
ENSMUSG00000002897	Il17ra	272.981	225.058	902.059	650.332	249.02	776.196	-3.11637	-1.63987	5.91756e-12	9.73657e-10
ENSMUSG00000030789	Itgax	23.0984	37.6945	111.41	78.4558	30.3964	94.9327	-3.12997	-1.64615	0.000902186	0.0155996
ENSMUSG00000036596	Cpz	146.99	82.0409	370.168	347.852	114.515	359.01	-3.13066	-1.64647	1.35787e-07	8.77062e-06
ENSMUSG00000027408	Cpxm1	199.486	140.8	557.048	512.326	170.143	534.687	-3.13992	-1.65073	5.35884e-11	6.75516e-09
ENSMUSG00000045932	Ifit2	187.937	165.19	376.457	736.35	176.564	556.404	-3.14964	-1.65519	1.16374e-07	7.643e-06
ENSMUSG00000037138	Aff3	130.191	158.539	407.005	508.545	144.365	457.775	-3.17216	-1.66547	1.29579e-10	1.53444e-08
ENSMUSG00000053414	Hunk	18.8987	25.4992	84.4557	56.715	22.199	70.5854	-3.18505	-1.67131	0.00259817	0.0362283
ENSMUSG00000006403	Adamts4	81.8944	53.2157	223.718	207.955	67.5551	215.836	-3.19057	-1.67381	1.26808e-06	6.4355e-05
ENSMUSG00000037868	Egr2	37.7974	25.4992	133.871	69.0033	31.6483	101.437	-3.20306	-1.67945	0.00106256	0.0178016
ENSMUSG00000022754	Tmem45a	30.4479	47.6724	117.699	132.335	39.0602	125.017	-3.20557	-1.68058	9.07789e-05	0.00245496
ENSMUSG00000056290	Ms4a4b	44.097	35.4772	166.216	89.7988	39.7871	128.007	-3.21692	-1.68568	0.000239913	0.00534962
ENSMUSG00000024397	Aif1	16.7988	35.4772	54.8064	113.43	26.138	84.1182	-3.2234	-1.68858	0.00374732	0.0482093
ENSMUSG00000020865	Abcc3	82.9443	83.1496	240.789	302.48	83.0469	271.634	-3.27008	-1.70933	2.08092e-08	1.61024e-06
ENSMUSG00000031562	Dctd	12.5991	41.0205	92.5419	85.0725	26.8098	88.8072	-3.32396	-1.73291	0.00248395	0.0351054
ENSMUSG00000022206	Npr3	1676.73	1723.97	4785.23	6586.51	1700.35	5685.87	-3.34384	-1.74151	2.97593e-22	2.59564e-19
ENSMUSG00000057346	Apol9a	48.2967	48.7811	111.41	215.517	48.5389	163.463	-3.36585	-1.75097	4.18575e-05	0.00130075
ENSMUSG00000019235	Rps6kl1	50.3965	41.0205	185.982	121.937	45.7085	153.96	-3.36729	-1.75159	1.70591e-05	0.000608791
ENSMUSG00000000838	Fmr1	1443.65	1899.14	4859.8	6437.16	1671.39	5648.48	-3.37984	-1.75695	7.3701e-20	4.80008e-17
ENSMUSG00000069793	Slfn9	30.4479	57.6504	98.8312	200.393	44.0491	149.612	-3.40058	-1.76578	0.000223815	0.00505751
ENSMUSG00000036412	Arsi	70.3452	89.8015	314.463	229.696	80.0734	272.079	-3.40164	-1.76623	4.50435e-08	3.21496e-06
ENSMUSG00000032011	Thy1	163.789	168.516	592.987	543.519	166.153	568.253	-3.42066	-1.77427	5.1882e-15	1.47449e-12
ENSMUSG00000030107	Usp18	51.4465	70.9543	146.45	276.013	61.2004	211.231	-3.45297	-1.78784	8.0935e-06	0.000319468
ENSMUSG00000035042	Ccl5	45.1469	37.6945	171.607	116.266	41.4207	143.936	-3.47408	-1.79663	1.51396e-05	0.000551624
ENSMUSG00000021396	Nxnl2	13.6491	28.8252	87.1511	62.3865	21.2371	74.7688	-3.53181	-1.82041	0.00153196	0.0238983
ENSMUSG00000035208	Slfn8	101.843	138.583	290.204	564.315	120.213	427.259	-3.55525	-1.82995	7.47185e-08	5.10011e-06
ENSMUSG00000066684	Pilrb1	20.9986	14.4126	63.791	63.3318	17.7056	63.5614	-3.58395	-1.84155	0.00146815	0.0230822
ENSMUSG00000037379	Spon2	212.085	279.383	1014.37	745.803	245.734	880.085	-3.58404	-1.84159	1.22174e-14	3.2926e-12
ENSMUSG00000057729	Prtn3	40.9472	32.1512	158.13	104.923	36.5492	131.526	-3.59685	-1.84673	2.37243e-05	0.00081862
ENSMUSG00000078763	Slfn1	28.3481	21.0646	62.8926	115.321	24.7063	89.1066	-3.60025	-1.8481	0.000556013	0.0104581
ENSMUSG00000043263	Ifi209	78.7446	65.411	223.718	302.48	72.0778	263.099	-3.6467	-1.86659	9.53392e-09	8.01208e-07
ENSMUSG00000092021	Gbp11	32.5478	26.6079	48.5171	169.2	29.5778	108.858	-3.67556	-1.87796	0.00150978	0.023623
ENSMUSG00000001334	Fndc5	13.6491	23.2819	65.588	71.839	18.4655	68.7135	-3.72939	-1.89894	0.000899067	0.0155802
ENSMUSG00000073491	Ifi213	64.0456	68.737	124.887	371.483	66.3913	248.185	-3.73689	-1.90184	2.9316e-05	0.000972905
ENSMUSG00000036856	Wnt4	16.7988	43.2378	126.684	98.3061	30.0183	112.495	-3.75998	-1.91073	0.000196517	0.00457492
ENSMUSG00000059089	Fcgr4	26.2482	14.4126	64.6895	88.8535	20.3304	76.7715	-3.7656	-1.91288	0.000644488	0.0118657
ENSMUSG00000041827	Oasl1	33.5977	28.8252	71.8772	164.474	31.2114	118.175	-3.78173	-1.91905	0.000179134	0.00426186
ENSMUSG00000003469	Phyhip	43.047	28.8252	169.81	105.868	35.9361	137.839	-3.83173	-1.93799	1.53117e-05	0.000554052
ENSMUSG00000026185	Igfbp5	2919.85	5253.94	16229.9	15170.3	4086.9	15700.1	-3.8419	-1.94182	9.18254e-18	4.63007e-15
ENSMUSG00000037849	Ifi206	16.7988	26.6079	56.6033	110.594	21.7034	83.5988	-3.85607	-1.94713	0.000625635	0.0115731
ENSMUSG00000031004	Mki67	71.3951	45.4551	178.795	276.958	58.4251	227.876	-3.89321	-1.96096	2.17879e-07	1.35145e-05
ENSMUSG00000034855	Cxcl10	31.4978	42.1291	151.841	144.623	36.8135	148.232	-4.03201	-2.0115	5.6404e-07	3.14875e-05
ENSMUSG00000023341	Mx2	16.7988	28.8252	53.0094	131.39	22.812	92.1996	-4.04618	-2.01656	0.000623001	0.0115381
ENSMUSG00000025885	Myo5b	58.796	85.3669	267.743	316.659	72.0814	292.201	-4.05872	-2.02102	2.13006e-10	2.4663e-08
ENSMUSG00000039628	Hs3st6	16.7988	7.76063	53.0094	48.2078	12.2797	50.6086	-4.10779	-2.03836	0.00274579	0.0379147
ENSMUSG00000094910	D430019H16Rik	13.6491	18.8472	43.1263	90.744	16.2481	66.9352	-4.12194	-2.04332	0.00116623	0.0191485
ENSMUSG00000035835	Plppr3	195.287	121.953	689.123	628.592	158.62	658.857	-4.14889	-2.05272	3.07268e-15	9.36815e-13
ENSMUSG00000090164	BC035044	20.9986	7.76063	52.111	68.058	14.3796	60.0845	-4.16083	-2.05687	0.00175404	0.0264647
ENSMUSG00000051627	H1f4	13.6491	48.7811	191.373	76.5653	31.2151	133.969	-4.30624	-2.10643	0.000410506	0.00822643
ENSMUSG00000104713	Gbp6	101.843	70.9543	240.789	510.435	86.3987	375.612	-4.3422	-2.11843	1.40638e-08	1.13315e-06
ENSMUSG00000052776	Oas1a	44.097	89.8015	170.708	424.417	66.9493	297.563	-4.44943	-2.15362	1.51873e-06	7.56028e-05
ENSMUSG00000023011	Faim2	7.3495	15.5213	56.6033	45.372	11.4354	50.9877	-4.47542	-2.16202	0.00170345	0.025826
ENSMUSG00000023064	Sncg	786.396	863.647	3579.49	3840.55	825.021	3710.02	-4.49741	-2.1691	4.60948e-45	1.80127e-41
ENSMUSG00000042842	Serpinb6b	221.535	121.953	894.871	680.58	171.744	787.726	-4.58166	-2.19587	1.12115e-14	3.1294e-12
ENSMUSG00000040152	Thbs1	2160.75	1329.28	9432.99	6741.53	1745.02	8087.26	-4.63385	-2.21221	5.30808e-22	4.36688e-19
ENSMUSG00000045328	Cenpe	10.4993	11.0866	44.0248	57.6603	10.7929	50.8425	-4.71042	-2.23586	0.000901365	0.0155996
ENSMUSG00000027514	Zbp1	61.9457	82.0409	193.17	486.804	71.9933	339.987	-4.7237	-2.23992	4.65568e-08	3.30786e-06
ENSMUSG00000037406	Htra4	14.699	28.8252	97.0342	127.609	21.7621	112.322	-5.17579	-2.37178	2.5799e-06	0.00011757
ENSMUSG00000062488	Ifit3b	38.8473	63.1937	207.545	367.702	51.0205	287.624	-5.64498	-2.49697	1.09939e-10	1.33214e-08
ENSMUSG00000038156	Spon1	936.536	1115.31	6376.41	5322.71	1025.92	5849.56	-5.70292	-2.5117	9.089e-51	4.73567e-47
ENSMUSG00000094796	BC147527	4.19971	12.1953	29.6494	64.277	8.19749	46.9632	-5.75241	-2.52417	0.00166184	0.0253922
ENSMUSG00000020914	Top2a	29.398	19.9559	134.77	155.966	24.6769	145.368	-5.87785	-2.55529	5.38896e-09	4.84108e-07
ENSMUSG00000035692	Isg15	31.4978	37.6945	174.302	234.422	34.5962	204.362	-5.9107	-2.56333	2.14592e-11	3.07733e-09
ENSMUSG00000048424	Ranbp3l	4.19971	5.54331	24.2586	36.8648	4.87151	30.5617	-6.28083	-2.65095	0.00371236	0.0478384
ENSMUSG00000074896	Ifit3	152.24	171.842	629.824	1444.34	162.041	1037.08	-6.4002	-2.67812	5.78006e-06	0.000236513
ENSMUSG00000066861	Oas1g	5.24964	24.3905	39.5325	153.131	14.8201	96.3315	-6.52418	-2.7058	0.000282313	0.00604497
ENSMUSG00000040035	Disp2	8.39942	16.6299	52.111	111.54	12.5147	81.8253	-6.55571	-2.71275	2.2772e-05	0.000794528
ENSMUSG00000032374	Plod2	243.583	340.359	2054.79	1795.98	291.971	1925.38	-6.59981	-2.72242	1.53277e-40	4.79176e-37
ENSMUSG00000046215	Rprml	6.29957	4.43464	37.7355	34.9743	5.36711	36.3549	-6.75937	-2.75689	0.00107917	0.0180026
ENSMUSG00000033595	Lgi3	4.19971	4.43464	36.8371	21.7408	4.31718	29.2889	-6.79088	-2.7636	0.0036476	0.0473552
ENSMUSG00000028037	Ifi44	48.2967	60.9764	185.084	569.041	54.6365	377.062	-6.90291	-2.78721	4.01799e-10	4.43815e-08
ENSMUSG00000025789	St8sia2	17.8488	14.4126	141.958	87.9083	16.1307	114.933	-7.11985	-2.83185	5.32648e-08	3.73355e-06
ENSMUSG00000034459	Ifit1	70.3452	120.844	432.162	932.962	95.5946	682.562	-7.14726	-2.83739	2.94589e-15	9.20944e-13
ENSMUSG00000040264	Gbp2b	19.9486	3.32598	123.988	44.4268	11.6373	84.2075	-7.19859	-2.84771	0.000144831	0.00363378
ENSMUSG00000105096	Gbp10	9.44935	29.9338	117.699	183.379	19.6916	150.539	-7.68029	-2.94116	2.47388e-08	1.87715e-06
ENSMUSG00000032661	Oas3	18.8987	11.0866	53.0094	186.214	14.9927	119.612	-7.95497	-2.99186	2.81458e-06	0.000126786
ENSMUSG00000049538	Adamts16	14.699	47.6724	320.752	189.05	31.1857	254.901	-8.20922	-3.03725	1.24488e-10	1.48539e-08
ENSMUSG00000037086	Prr32	2.09986	16.6299	54.8064	117.211	9.36489	86.0087	-9.25134	-3.20966	1.52959e-05	0.000554052
ENSMUSG00000024675	Ms4a4c	4.19971	7.76063	26.954	98.3061	5.98017	62.63	-10.5012	-3.39248	4.30164e-05	0.00132723
ENSMUSG00000049152	Ugt3a2	1.04993	5.54331	27.8524	46.3173	3.29662	37.0848	-11.3566	-3.50546	0.000358742	0.00735891
ENSMUSG00000086962	Gm12248	11.5492	7.76063	105.12	116.266	9.65492	110.693	-11.4297	-3.51472	2.6492e-10	2.97911e-08
ENSMUSG00000051748	Wfdc21	53.5463	50.9984	934.404	272.232	52.2724	603.318	-11.5421	-3.52883	2.82373e-05	0.000947162
ENSMUSG00000115439	Gm36107	2.09986	2.21732	20.6647	29.3028	2.15859	24.9837	-11.5743	-3.53285	0.0018968	0.0282908
ENSMUSG00000039533	Mmd2	25.1983	52.1071	608.261	354.469	38.6527	481.365	-12.4975	-3.64357	2.98903e-22	2.59564e-19
ENSMUSG00000048485	Zbtb8b	2.09986	2.21732	36.8371	34.9743	2.15859	35.9057	-16.643	-4.05684	9.1819e-05	0.0024788
ENSMUSG00000067786	Nnat	227.834	158.539	5188.64	5778.32	193.186	5483.48	-28.346	-4.82507	4.33472e-140	6.77561e-136
[truncated: 4 more rows]

## Sheet: DEGs AS vs CS
gene_id	gene_name	AS1	AS2	CS1	CS2	AS	CS	FC	log2FoldChange	pvalue	padj
[truncated: 5,232 more rows]

[truncated: 5 more sheets: DEGs OV vs AV, DEGs OS vs AS, DEGs CV vs CS, DEGs OV vs OS, DEGs AV vs AS]
