# Supplementary material for: Mechanic Insight into the Distinct and Common Roles of Ovariectomy Versus Adrenalectomy on Adipose Tissue Remodeling in Female Mice
Source: Int J Mol Sci. 2023 Jan 24;24(3):2308. doi: 10.3390/ijms24032308 (PMC9916485; doi:10.3390/ijms24032308)
Supplement: Supplementary file 1 [file ijms-24-02308-s001.zip › Tabel S2 Functional enrichment analysis of DEGs using DAVID.xlsx]

## Sheet: DEGs up (OV vs CV)
Category	Term	Count	%	PValue	Genes	List Total	Pop Hits	Pop Total	Fold Enrichment	Bonferroni	Benjamini	FDR
GOTERM_BP_FAT	GO:0048511~rhythmic process	11	10.5769	2.25465e-05	ENSMUSG00000021775, ENSMUSG00000003949, ENSMUSG00000020889, ENSMUSG00000053907, ENSMUSG00000059201, ENSMUSG00000042429, ENSMUSG00000028957, ENSMUSG00000059824, ENSMUSG00000055866, ENSMUSG00000000440, ENSMUSG00000022389	93	410	19596	5.65319	0.0635261	0.0162658	0.0157068
GOTERM_BP_FAT	GO:0031325~positive regulation of cellular metabolic process	35	33.6538	1.79478e-05	ENSMUSG00000030087, ENSMUSG00000056313, ENSMUSG00000027111, ENSMUSG00000059201, ENSMUSG00000042429, ENSMUSG00000006611, ENSMUSG00000042249, ENSMUSG00000002058, ENSMUSG00000022389, ENSMUSG00000023019, ENSMUSG00000069049, ENSMUSG00000021775, ENSMUSG00000003949, ENSMUSG00000024924, ENSMUSG00000037010, ENSMUSG00000064354, ENSMUSG00000020889, ENSMUSG00000030747, ENSMUSG00000038007, ENSMUSG00000063060,…	93	3584	19596	2.05771	0.0509052	0.0162658	0.0157068
GOTERM_BP_FAT	GO:0023051~regulation of signaling	35	33.6538	2.79481e-05	ENSMUSG00000030683, ENSMUSG00000030087, ENSMUSG00000056313, ENSMUSG00000027750, ENSMUSG00000027111, ENSMUSG00000056673, ENSMUSG00000059201, ENSMUSG00000027533, ENSMUSG00000096255, ENSMUSG00000042429, ENSMUSG00000049303, ENSMUSG00000006611, ENSMUSG00000049327, ENSMUSG00000042249, ENSMUSG00000037010, ENSMUSG00000020889, ENSMUSG00000055866, ENSMUSG00000063060, ENSMUSG00000018217, ENSMUSG00000031442,…	93	3658	19596	2.01608	0.0781365	0.0162658	0.0157068
GOTERM_BP_FAT	GO:0010646~regulation of cell communication	35	33.6538	2.42492e-05	ENSMUSG00000030683, ENSMUSG00000030087, ENSMUSG00000056313, ENSMUSG00000027750, ENSMUSG00000027111, ENSMUSG00000056673, ENSMUSG00000059201, ENSMUSG00000027533, ENSMUSG00000096255, ENSMUSG00000042429, ENSMUSG00000049303, ENSMUSG00000006611, ENSMUSG00000049327, ENSMUSG00000042249, ENSMUSG00000037010, ENSMUSG00000020889, ENSMUSG00000055866, ENSMUSG00000063060, ENSMUSG00000018217, ENSMUSG00000031442,…	93	3634	19596	2.0294	0.0681564	0.0162658	0.0157068
GOTERM_BP_FAT	GO:0009893~positive regulation of metabolic process	37	35.5769	1.4074e-05	ENSMUSG00000030087, ENSMUSG00000056313, ENSMUSG00000027111, ENSMUSG00000059201, ENSMUSG00000042429, ENSMUSG00000006611, ENSMUSG00000042249, ENSMUSG00000002058, ENSMUSG00000022389, ENSMUSG00000023019, ENSMUSG00000069049, ENSMUSG00000021775, ENSMUSG00000003949, ENSMUSG00000024924, ENSMUSG00000037010, ENSMUSG00000064354, ENSMUSG00000020889, ENSMUSG00000030747, ENSMUSG00000038007, ENSMUSG00000063060,…	93	3875	19596	2.01194	0.0401417	0.0162658	0.0157068
GOTERM_BP_FAT	GO:0015980~energy derivation by oxidation of organic compounds	9	8.65385	4.11802e-05	ENSMUSG00000023019, ENSMUSG00000032279, ENSMUSG00000064354, ENSMUSG00000020889, ENSMUSG00000067279, ENSMUSG00000059201, ENSMUSG00000064358, ENSMUSG00000055866, ENSMUSG00000049999	93	271	19596	6.99774	0.112971	0.0199724	0.0192861
GOTERM_BP_FAT	GO:0009628~response to abiotic stimulus	19	18.2692	5.30512e-05	ENSMUSG00000056313, ENSMUSG00000028410, ENSMUSG00000027750, ENSMUSG00000059201, ENSMUSG00000042429, ENSMUSG00000028957, ENSMUSG00000000440, ENSMUSG00000024924, ENSMUSG00000024935, ENSMUSG00000000628, ENSMUSG00000064354, ENSMUSG00000100862, ENSMUSG00000039782, ENSMUSG00000045382, ENSMUSG00000010064, ENSMUSG00000051596, ENSMUSG00000054720, ENSMUSG00000055866, ENSMUSG00000018217	93	1360	19596	2.94374	0.143102	0.0220541	0.0212963
GOTERM_BP_FAT	GO:0055114~oxidation-reduction process	11	10.5769	6.06435e-05	ENSMUSG00000023019, ENSMUSG00000032279, ENSMUSG00000064354, ENSMUSG00000020889, ENSMUSG00000067279, ENSMUSG00000059201, ENSMUSG00000064358, ENSMUSG00000030747, ENSMUSG00000055866, ENSMUSG00000049999, ENSMUSG00000000440	93	461	19596	5.02778	0.161834	0.0220591	0.021301
GOTERM_BP_FAT	GO:0051246~regulation of protein metabolic process	30	28.8462	9.3538e-05	ENSMUSG00000030087, ENSMUSG00000056313, ENSMUSG00000059201, ENSMUSG00000096255, ENSMUSG00000042429, ENSMUSG00000006611, ENSMUSG00000042249, ENSMUSG00000002058, ENSMUSG00000069049, ENSMUSG00000024924, ENSMUSG00000030747, ENSMUSG00000038007, ENSMUSG00000055866, ENSMUSG00000063060, ENSMUSG00000018217, ENSMUSG00000020190, ENSMUSG00000028410, ENSMUSG00000029385, ENSMUSG00000020593, ENSMUSG00000044338,…	93	3046	19596	2.07528	0.238376	0.0228822	0.0220959
GOTERM_BP_FAT	GO:0010604~positive regulation of macromolecule metabolic process	33	31.7308	9.05246e-05	ENSMUSG00000030087, ENSMUSG00000056313, ENSMUSG00000027111, ENSMUSG00000059201, ENSMUSG00000042429, ENSMUSG00000006611, ENSMUSG00000042249, ENSMUSG00000002058, ENSMUSG00000022389, ENSMUSG00000069049, ENSMUSG00000021775, ENSMUSG00000003949, ENSMUSG00000024924, ENSMUSG00000037010, ENSMUSG00000020889, ENSMUSG00000038007, ENSMUSG00000063060, ENSMUSG00000018217, ENSMUSG00000059824, ENSMUSG00000031442,…	93	3531	19596	1.96925	0.231665	0.0228822	0.0220959
GOTERM_BP_FAT	GO:0007623~circadian rhythm	8	7.69231	9.43595e-05	ENSMUSG00000021775, ENSMUSG00000020889, ENSMUSG00000053907, ENSMUSG00000059201, ENSMUSG00000042429, ENSMUSG00000028957, ENSMUSG00000059824, ENSMUSG00000055866	93	226	19596	7.45875	0.240195	0.0228822	0.0220959
GOTERM_BP_FAT	GO:0006006~glucose metabolic process	8	7.69231	8.43984e-05	ENSMUSG00000023019, ENSMUSG00000000628, ENSMUSG00000067279, ENSMUSG00000059201, ENSMUSG00000027533, ENSMUSG00000030747, ENSMUSG00000055866, ENSMUSG00000049999	93	222	19596	7.59314	0.217839	0.0228822	0.0220959
GOTERM_BP_FAT	GO:0006091~generation of precursor metabolites and energy	10	9.61538	0.000120441	ENSMUSG00000023019, ENSMUSG00000032279, ENSMUSG00000000628, ENSMUSG00000064354, ENSMUSG00000020889, ENSMUSG00000067279, ENSMUSG00000059201, ENSMUSG00000064358, ENSMUSG00000055866, ENSMUSG00000049999	93	405	19596	5.20271	0.295752	0.0269602	0.0260338
GOTERM_BP_FAT	GO:1901615~organic hydroxy compound metabolic process	11	10.5769	0.00016569	ENSMUSG00000024747, ENSMUSG00000024924, ENSMUSG00000024935, ENSMUSG00000020889, ENSMUSG00000059201, ENSMUSG00000030747, ENSMUSG00000038007, ENSMUSG00000055866, ENSMUSG00000042249, ENSMUSG00000018217, ENSMUSG00000030246	93	521	19596	4.44876	0.382678	0.0283623	0.0273876
GOTERM_BP_FAT	GO:0016310~phosphorylation	25	24.0385	0.000161571	ENSMUSG00000056313, ENSMUSG00000027111, ENSMUSG00000059201, ENSMUSG00000064358, ENSMUSG00000096255, ENSMUSG00000042429, ENSMUSG00000006611, ENSMUSG00000042249, ENSMUSG00000002058, ENSMUSG00000023019, ENSMUSG00000024924, ENSMUSG00000037010, ENSMUSG00000064354, ENSMUSG00000018217, ENSMUSG00000020190, ENSMUSG00000028410, ENSMUSG00000029385, ENSMUSG00000044338, ENSMUSG00000000440, ENSMUSG00000024935,…	93	2351	19596	2.24064	0.375229	0.0283623	0.0273876
GOTERM_BP_FAT	GO:0006865~amino acid transport	7	6.73077	0.000155102	ENSMUSG00000024935, ENSMUSG00000059201, ENSMUSG00000042429, ENSMUSG00000010064, ENSMUSG00000054720, ENSMUSG00000009378, ENSMUSG00000055866	93	171	19596	8.62554	0.363352	0.0283623	0.0273876
GOTERM_BP_FAT	GO:0006793~phosphorus metabolic process	31	29.8077	0.00014224	ENSMUSG00000056313, ENSMUSG00000027111, ENSMUSG00000059201, ENSMUSG00000064358, ENSMUSG00000027533, ENSMUSG00000096255, ENSMUSG00000042429, ENSMUSG00000006611, ENSMUSG00000042249, ENSMUSG00000002058, ENSMUSG00000023019, ENSMUSG00000024924, ENSMUSG00000037010, ENSMUSG00000064354, ENSMUSG00000030747, ENSMUSG00000018217, ENSMUSG00000030246, ENSMUSG00000032279, ENSMUSG00000020190, ENSMUSG00000028410,…	93	3281	19596	1.99086	0.339058	0.0283623	0.0273876
GOTERM_BP_FAT	GO:0045444~fat cell differentiation	8	7.69231	0.000180609	ENSMUSG00000066687, ENSMUSG00000027111, ENSMUSG00000059201, ENSMUSG00000020593, ENSMUSG00000039956, ENSMUSG00000054720, ENSMUSG00000055866, ENSMUSG00000000440	93	251	19596	6.71585	0.408918	0.0291985	0.0281951
GOTERM_BP_FAT	GO:0032268~regulation of cellular protein metabolic process	28	26.9231	0.000202485	ENSMUSG00000030087, ENSMUSG00000056313, ENSMUSG00000059201, ENSMUSG00000096255, ENSMUSG00000042429, ENSMUSG00000006611, ENSMUSG00000042249, ENSMUSG00000002058, ENSMUSG00000069049, ENSMUSG00000024924, ENSMUSG00000038007, ENSMUSG00000055866, ENSMUSG00000063060, ENSMUSG00000018217, ENSMUSG00000020190, ENSMUSG00000028410, ENSMUSG00000029385, ENSMUSG00000020593, ENSMUSG00000044338, ENSMUSG00000000440,…	93	2856	19596	2.06578	0.445392	0.0296533	0.0286343
GOTERM_BP_FAT	GO:0019318~hexose metabolic process	8	7.69231	0.000203803	ENSMUSG00000023019, ENSMUSG00000000628, ENSMUSG00000067279, ENSMUSG00000059201, ENSMUSG00000027533, ENSMUSG00000030747, ENSMUSG00000055866, ENSMUSG00000049999	93	256	19596	6.58468	0.447515	0.0296533	0.0286343
GOTERM_BP_FAT	GO:0070482~response to oxygen levels	10	9.61538	0.000227536	ENSMUSG00000024924, ENSMUSG00000024935, ENSMUSG00000000628, ENSMUSG00000027750, ENSMUSG00000100862, ENSMUSG00000039782, ENSMUSG00000059201, ENSMUSG00000045382, ENSMUSG00000042429, ENSMUSG00000000440	93	441	19596	4.778	0.484404	0.0296769	0.0286571
GOTERM_BP_FAT	GO:0044283~small molecule biosynthetic process	11	10.5769	0.00023456	ENSMUSG00000023019, ENSMUSG00000029059, ENSMUSG00000026473, ENSMUSG00000020889, ENSMUSG00000059201, ENSMUSG00000027533, ENSMUSG00000030747, ENSMUSG00000035376, ENSMUSG00000038007, ENSMUSG00000055866, ENSMUSG00000030246	93	544	19596	4.26067	0.494842	0.0296769	0.0286571
GOTERM_BP_FAT	GO:0006796~phosphate-containing compound metabolic process	30	28.8462	0.000222314	ENSMUSG00000056313, ENSMUSG00000027111, ENSMUSG00000059201, ENSMUSG00000064358, ENSMUSG00000027533, ENSMUSG00000096255, ENSMUSG00000042429, ENSMUSG00000006611, ENSMUSG00000042249, ENSMUSG00000002058, ENSMUSG00000023019, ENSMUSG00000024924, ENSMUSG00000037010, ENSMUSG00000064354, ENSMUSG00000018217, ENSMUSG00000030246, ENSMUSG00000032279, ENSMUSG00000020190, ENSMUSG00000028410, ENSMUSG00000029385,…	93	3197	19596	1.97726	0.476505	0.0296769	0.0286571
GOTERM_BP_FAT	GO:0009966~regulation of signal transduction	29	27.8846	0.000257855	ENSMUSG00000030683, ENSMUSG00000030087, ENSMUSG00000056313, ENSMUSG00000027750, ENSMUSG00000027111, ENSMUSG00000056673, ENSMUSG00000059201, ENSMUSG00000027533, ENSMUSG00000096255, ENSMUSG00000042429, ENSMUSG00000006611, ENSMUSG00000049327, ENSMUSG00000042249, ENSMUSG00000037010, ENSMUSG00000020889, ENSMUSG00000063060, ENSMUSG00000018217, ENSMUSG00000031442, ENSMUSG00000057315, ENSMUSG00000028410,…	93	3060	19596	1.99692	0.527969	0.0312649	0.0301905
GOTERM_BP_FAT	GO:0048514~blood vessel morphogenesis	12	11.5385	0.000318592	ENSMUSG00000024935, ENSMUSG00000000628, ENSMUSG00000057315, ENSMUSG00000021701, ENSMUSG00000054690, ENSMUSG00000037010, ENSMUSG00000026473, ENSMUSG00000059201, ENSMUSG00000045382, ENSMUSG00000032911, ENSMUSG00000044338, ENSMUSG00000000440	93	675	19596	3.74595	0.604486	0.0333126	0.0321678
GOTERM_BP_FAT	GO:0046942~carboxylic acid transport	9	8.65385	0.000314441	ENSMUSG00000024935, ENSMUSG00000059201, ENSMUSG00000027533, ENSMUSG00000042429, ENSMUSG00000010064, ENSMUSG00000054720, ENSMUSG00000009378, ENSMUSG00000055866, ENSMUSG00000000440	93	364	19596	5.20985	0.599676	0.0333126	0.0321678
GOTERM_BP_FAT	GO:0032787~monocarboxylic acid metabolic process	12	11.5385	0.000343429	ENSMUSG00000023019, ENSMUSG00000000628, ENSMUSG00000029059, ENSMUSG00000020889, ENSMUSG00000059201, ENSMUSG00000027533, ENSMUSG00000030747, ENSMUSG00000035376, ENSMUSG00000020593, ENSMUSG00000055866, ENSMUSG00000000440, ENSMUSG00000030246	93	681	19596	3.71295	0.632081	0.0333126	0.0321678
GOTERM_BP_FAT	GO:0015849~organic acid transport	9	8.65385	0.00033218	ENSMUSG00000024935, ENSMUSG00000059201, ENSMUSG00000027533, ENSMUSG00000042429, ENSMUSG00000010064, ENSMUSG00000054720, ENSMUSG00000009378, ENSMUSG00000055866, ENSMUSG00000000440	93	367	19596	5.16727	0.61983	0.0333126	0.0321678
GOTERM_BP_FAT	GO:0009266~response to temperature stimulus	7	6.73077	0.000332896	ENSMUSG00000056313, ENSMUSG00000064354, ENSMUSG00000028410, ENSMUSG00000045382, ENSMUSG00000042429, ENSMUSG00000000440, ENSMUSG00000018217	93	197	19596	7.48715	0.620621	0.0333126	0.0321678
GOTERM_BP_FAT	GO:0001525~angiogenesis	11	10.5769	0.000317078	ENSMUSG00000000628, ENSMUSG00000057315, ENSMUSG00000021701, ENSMUSG00000054690, ENSMUSG00000037010, ENSMUSG00000026473, ENSMUSG00000059201, ENSMUSG00000045382, ENSMUSG00000032911, ENSMUSG00000044338, ENSMUSG00000000440	93	565	19596	4.10231	0.602738	0.0333126	0.0321678
GOTERM_BP_FAT	GO:0009719~response to endogenous stimulus	21	20.1923	0.000365881	ENSMUSG00000030087, ENSMUSG00000028410, ENSMUSG00000027750, ENSMUSG00000056673, ENSMUSG00000059201, ENSMUSG00000042834, ENSMUSG00000042429, ENSMUSG00000020593, ENSMUSG00000006611, ENSMUSG00000000440, ENSMUSG00000021775, ENSMUSG00000023019, ENSMUSG00000024935, ENSMUSG00000037010, ENSMUSG00000020889, ENSMUSG00000066366, ENSMUSG00000039782, ENSMUSG00000053907, ENSMUSG00000045382, ENSMUSG00000030249,…	93	1874	19596	2.36121	0.655367	0.0343456	0.0331653
GOTERM_BP_FAT	GO:0042752~regulation of circadian rhythm	6	5.76923	0.000395462	ENSMUSG00000021775, ENSMUSG00000020889, ENSMUSG00000042429, ENSMUSG00000028957, ENSMUSG00000055866, ENSMUSG00000000440	93	132	19596	9.57771	0.683812	0.0359624	0.0347265
GOTERM_BP_FAT	GO:0051174~regulation of phosphorus metabolic process	21	20.1923	0.00042877	ENSMUSG00000056313, ENSMUSG00000028410, ENSMUSG00000027111, ENSMUSG00000029385, ENSMUSG00000059201, ENSMUSG00000096255, ENSMUSG00000042429, ENSMUSG00000020593, ENSMUSG00000006611, ENSMUSG00000044338, ENSMUSG00000042249, ENSMUSG00000000440, ENSMUSG00000002058, ENSMUSG00000023019, ENSMUSG00000024924, ENSMUSG00000024935, ENSMUSG00000064354, ENSMUSG00000037010, ENSMUSG00000045382, ENSMUSG00000032911,…	93	1897	19596	2.33258	0.713041	0.0360205	0.0347827
GOTERM_BP_FAT	GO:0019220~regulation of phosphate metabolic process	21	20.1923	0.000414345	ENSMUSG00000056313, ENSMUSG00000028410, ENSMUSG00000027111, ENSMUSG00000029385, ENSMUSG00000059201, ENSMUSG00000096255, ENSMUSG00000042429, ENSMUSG00000020593, ENSMUSG00000006611, ENSMUSG00000044338, ENSMUSG00000042249, ENSMUSG00000000440, ENSMUSG00000002058, ENSMUSG00000023019, ENSMUSG00000024924, ENSMUSG00000024935, ENSMUSG00000064354, ENSMUSG00000037010, ENSMUSG00000045382, ENSMUSG00000032911,…	93	1892	19596	2.33874	0.70073	0.0360205	0.0347827
GOTERM_BP_FAT	GO:0005996~monosaccharide metabolic process	8	7.69231	0.000433236	ENSMUSG00000023019, ENSMUSG00000000628, ENSMUSG00000067279, ENSMUSG00000059201, ENSMUSG00000027533, ENSMUSG00000030747, ENSMUSG00000055866, ENSMUSG00000049999	93	290	19596	5.81268	0.71675	0.0360205	0.0347827
GOTERM_BP_FAT	GO:0016051~carbohydrate biosynthetic process	7	6.73077	0.000569373	ENSMUSG00000023019, ENSMUSG00000020889, ENSMUSG00000067279, ENSMUSG00000059201, ENSMUSG00000030747, ENSMUSG00000055866, ENSMUSG00000049999	93	218	19596	6.76591	0.809465	0.0460243	0.0444428
GOTERM_BP_FAT	GO:0045937~positive regulation of phosphate metabolic process	16	15.3846	0.000666835	ENSMUSG00000056313, ENSMUSG00000027111, ENSMUSG00000059201, ENSMUSG00000042429, ENSMUSG00000006611, ENSMUSG00000044338, ENSMUSG00000042249, ENSMUSG00000000440, ENSMUSG00000002058, ENSMUSG00000023019, ENSMUSG00000024924, ENSMUSG00000024935, ENSMUSG00000064354, ENSMUSG00000037010, ENSMUSG00000045382, ENSMUSG00000032911	93	1247	19596	2.70357	0.856555	0.0486479	0.0469761
GOTERM_BP_FAT	GO:0034637~cellular carbohydrate biosynthetic process	5	4.80769	0.000658951	ENSMUSG00000020889, ENSMUSG00000067279, ENSMUSG00000059201, ENSMUSG00000055866, ENSMUSG00000049999	93	84	19596	12.5422	0.853223	0.0486479	0.0469761
GOTERM_BP_FAT	GO:0019752~carboxylic acid metabolic process	14	13.4615	0.000668699	ENSMUSG00000032279, ENSMUSG00000029059, ENSMUSG00000026473, ENSMUSG00000059201, ENSMUSG00000027533, ENSMUSG00000020593, ENSMUSG00000000440, ENSMUSG00000023019, ENSMUSG00000000628, ENSMUSG00000020889, ENSMUSG00000030747, ENSMUSG00000035376, ENSMUSG00000055866, ENSMUSG00000030246	93	984	19596	2.9979	0.857332	0.0486479	0.0469761
GOTERM_BP_FAT	GO:0010562~positive regulation of phosphorus metabolic process	16	15.3846	0.000666835	ENSMUSG00000056313, ENSMUSG00000027111, ENSMUSG00000059201, ENSMUSG00000042429, ENSMUSG00000006611, ENSMUSG00000044338, ENSMUSG00000042249, ENSMUSG00000000440, ENSMUSG00000002058, ENSMUSG00000023019, ENSMUSG00000024924, ENSMUSG00000024935, ENSMUSG00000064354, ENSMUSG00000037010, ENSMUSG00000045382, ENSMUSG00000032911	93	1247	19596	2.70357	0.856555	0.0486479	0.0469761
GOTERM_BP_FAT	GO:0005975~carbohydrate metabolic process	11	10.5769	0.000688159	ENSMUSG00000023019, ENSMUSG00000000628, ENSMUSG00000020889, ENSMUSG00000067279, ENSMUSG00000059201, ENSMUSG00000027533, ENSMUSG00000030747, ENSMUSG00000055866, ENSMUSG00000049999, ENSMUSG00000030246, ENSMUSG00000032401	93	624	19596	3.71443	0.865194	0.0488425	0.0471641
GOTERM_BP_FAT	GO:0048646~anatomical structure formation involved in morphogenesis	16	15.3846	0.000724	ENSMUSG00000057315, ENSMUSG00000054690, ENSMUSG00000026473, ENSMUSG00000059201, ENSMUSG00000044338, ENSMUSG00000026833, ENSMUSG00000000440, ENSMUSG00000024935, ENSMUSG00000000628, ENSMUSG00000018169, ENSMUSG00000021701, ENSMUSG00000037010, ENSMUSG00000045382, ENSMUSG00000032911, ENSMUSG00000063060, ENSMUSG00000018217	93	1257	19596	2.68206	0.878559	0.0489962	0.0473125
GOTERM_BP_FAT	GO:0042325~regulation of phosphorylation	19	18.2692	0.000720274	ENSMUSG00000056313, ENSMUSG00000028410, ENSMUSG00000027111, ENSMUSG00000029385, ENSMUSG00000059201, ENSMUSG00000096255, ENSMUSG00000042429, ENSMUSG00000006611, ENSMUSG00000044338, ENSMUSG00000042249, ENSMUSG00000000440, ENSMUSG00000002058, ENSMUSG00000023019, ENSMUSG00000024924, ENSMUSG00000024935, ENSMUSG00000037010, ENSMUSG00000045382, ENSMUSG00000032911, ENSMUSG00000018217	93	1679	19596	2.38445	0.877234	0.0489962	0.0473125
GOTERM_BP_FAT	GO:0051960~regulation of nervous system development	15	14.4231	0.000763913	ENSMUSG00000032452, ENSMUSG00000027111, ENSMUSG00000042834, ENSMUSG00000096255, ENSMUSG00000020593, ENSMUSG00000026833, ENSMUSG00000000440, ENSMUSG00000045776, ENSMUSG00000024924, ENSMUSG00000021701, ENSMUSG00000023915, ENSMUSG00000045382, ENSMUSG00000032911, ENSMUSG00000055866, ENSMUSG00000018217	93	1129	19596	2.79951	0.891889	0.0505224	0.0487863
GOTERM_BP_FAT	GO:0046883~regulation of hormone secretion	8	7.69231	0.000804644	ENSMUSG00000037010, ENSMUSG00000026473, ENSMUSG00000020889, ENSMUSG00000059201, ENSMUSG00000042429, ENSMUSG00000006611, ENSMUSG00000055866, ENSMUSG00000000440	93	322	19596	5.23502	0.903986	0.0520337	0.0502456
GOTERM_BP_FAT	GO:0010942~positive regulation of cell death	12	11.5385	0.000855637	ENSMUSG00000024935, ENSMUSG00000026672, ENSMUSG00000066687, ENSMUSG00000064354, ENSMUSG00000028410, ENSMUSG00000027111, ENSMUSG00000059201, ENSMUSG00000042429, ENSMUSG00000026833, ENSMUSG00000038007, ENSMUSG00000000440, ENSMUSG00000063060	93	760	19596	3.32699	0.917241	0.0541283	0.0522683
GOTERM_BP_FAT	GO:0042327~positive regulation of phosphorylation	15	14.4231	0.00088339	ENSMUSG00000056313, ENSMUSG00000027111, ENSMUSG00000059201, ENSMUSG00000042429, ENSMUSG00000006611, ENSMUSG00000044338, ENSMUSG00000042249, ENSMUSG00000000440, ENSMUSG00000002058, ENSMUSG00000023019, ENSMUSG00000024924, ENSMUSG00000024935, ENSMUSG00000037010, ENSMUSG00000045382, ENSMUSG00000032911	93	1146	19596	2.75798	0.92367	0.054695	0.0528155
GOTERM_BP_FAT	GO:0006112~energy reserve metabolic process	5	4.80769	0.000927408	ENSMUSG00000020889, ENSMUSG00000067279, ENSMUSG00000059201, ENSMUSG00000055866, ENSMUSG00000049999	93	92	19596	11.4516	0.932858	0.0562241	0.054292
GOTERM_BP_FAT	GO:0001568~blood vessel development	12	11.5385	0.000992534	ENSMUSG00000024935, ENSMUSG00000000628, ENSMUSG00000057315, ENSMUSG00000021701, ENSMUSG00000054690, ENSMUSG00000037010, ENSMUSG00000026473, ENSMUSG00000059201, ENSMUSG00000045382, ENSMUSG00000032911, ENSMUSG00000044338, ENSMUSG00000000440	93	774	19596	3.26682	0.944463	0.0589444	0.0569188
GOTERM_BP_FAT	GO:0090276~regulation of peptide hormone secretion	7	6.73077	0.00120791	ENSMUSG00000037010, ENSMUSG00000026473, ENSMUSG00000020889, ENSMUSG00000059201, ENSMUSG00000006611, ENSMUSG00000055866, ENSMUSG00000000440	93	252	19596	5.85305	0.970351	0.0703001	0.0678843
GOTERM_BP_FAT	GO:0009250~glucan biosynthetic process	4	3.84615	0.00131351	ENSMUSG00000020889, ENSMUSG00000067279, ENSMUSG00000055866, ENSMUSG00000049999	93	46	19596	18.3226	0.978206	0.0749472	0.0723717
GOTERM_BP_FAT	GO:0043436~oxoacid metabolic process	14	13.4615	0.00139062	ENSMUSG00000032279, ENSMUSG00000029059, ENSMUSG00000026473, ENSMUSG00000059201, ENSMUSG00000027533, ENSMUSG00000020593, ENSMUSG00000000440, ENSMUSG00000023019, ENSMUSG00000000628, ENSMUSG00000020889, ENSMUSG00000030747, ENSMUSG00000035376, ENSMUSG00000055866, ENSMUSG00000030246	93	1066	19596	2.76729	0.982593	0.0778212	0.0751469
GOTERM_BP_FAT	GO:0072358~cardiovascular system development	12	11.5385	0.00156124	ENSMUSG00000024935, ENSMUSG00000000628, ENSMUSG00000057315, ENSMUSG00000021701, ENSMUSG00000054690, ENSMUSG00000037010, ENSMUSG00000026473, ENSMUSG00000059201, ENSMUSG00000045382, ENSMUSG00000032911, ENSMUSG00000044338, ENSMUSG00000000440	93	819	19596	3.08732	0.989415	0.0826038	0.0797652
GOTERM_BP_FAT	GO:0009892~negative regulation of metabolic process	28	26.9231	0.001525	ENSMUSG00000035877, ENSMUSG00000030087, ENSMUSG00000059201, ENSMUSG00000096255, ENSMUSG00000042429, ENSMUSG00000006611, ENSMUSG00000049327, ENSMUSG00000021775, ENSMUSG00000037010, ENSMUSG00000020889, ENSMUSG00000030747, ENSMUSG00000038007, ENSMUSG00000055866, ENSMUSG00000063060, ENSMUSG00000018217, ENSMUSG00000028410, ENSMUSG00000026672, ENSMUSG00000003038, ENSMUSG00000020593, ENSMUSG00000028957,…	93	3242	19596	1.81982	0.988235	0.0826038	0.0797652
GOTERM_BP_FAT	GO:0001944~vasculature development	12	11.5385	0.00156124	ENSMUSG00000024935, ENSMUSG00000000628, ENSMUSG00000057315, ENSMUSG00000021701, ENSMUSG00000054690, ENSMUSG00000037010, ENSMUSG00000026473, ENSMUSG00000059201, ENSMUSG00000045382, ENSMUSG00000032911, ENSMUSG00000044338, ENSMUSG00000000440	93	819	19596	3.08732	0.989415	0.0826038	0.0797652
GOTERM_BP_FAT	GO:0006082~organic acid metabolic process	14	13.4615	0.00166923	ENSMUSG00000032279, ENSMUSG00000029059, ENSMUSG00000026473, ENSMUSG00000059201, ENSMUSG00000027533, ENSMUSG00000020593, ENSMUSG00000000440, ENSMUSG00000023019, ENSMUSG00000000628, ENSMUSG00000020889, ENSMUSG00000030747, ENSMUSG00000035376, ENSMUSG00000055866, ENSMUSG00000030246	93	1088	19596	2.71134	0.992274	0.0867404	0.0837596
GOTERM_BP_FAT	GO:0045859~regulation of protein kinase activity	11	10.5769	0.00170651	ENSMUSG00000024924, ENSMUSG00000024935, ENSMUSG00000056313, ENSMUSG00000028410, ENSMUSG00000029385, ENSMUSG00000059201, ENSMUSG00000042429, ENSMUSG00000032911, ENSMUSG00000000440, ENSMUSG00000018217, ENSMUSG00000002058	93	704	19596	3.29234	0.99307	0.087122	0.0841281
GOTERM_BP_FAT	GO:0002791~regulation of peptide secretion	8	7.69231	0.00173688	ENSMUSG00000037010, ENSMUSG00000026473, ENSMUSG00000020889, ENSMUSG00000059201, ENSMUSG00000042429, ENSMUSG00000006611, ENSMUSG00000055866, ENSMUSG00000000440	93	368	19596	4.58065	0.993657	0.0871435	0.0841488
GOTERM_BP_FAT	GO:0031668~cellular response to extracellular stimulus	7	6.73077	0.00184766	ENSMUSG00000027750, ENSMUSG00000027111, ENSMUSG00000026473, ENSMUSG00000059201, ENSMUSG00000010064, ENSMUSG00000006611, ENSMUSG00000000440	93	274	19596	5.38309	0.995408	0.0903571	0.087252
GOTERM_BP_FAT	GO:0031399~regulation of protein modification process	20	19.2308	0.00186303	ENSMUSG00000030087, ENSMUSG00000056313, ENSMUSG00000028410, ENSMUSG00000029385, ENSMUSG00000059201, ENSMUSG00000096255, ENSMUSG00000042429, ENSMUSG00000020593, ENSMUSG00000006611, ENSMUSG00000044338, ENSMUSG00000042249, ENSMUSG00000000440, ENSMUSG00000002058, ENSMUSG00000024924, ENSMUSG00000024935, ENSMUSG00000045382, ENSMUSG00000032911, ENSMUSG00000038007, ENSMUSG00000055866, ENSMUSG00000018217	93	1978	19596	2.13053	0.99561	0.0903571	0.087252
GOTERM_BP_FAT	GO:0036293~response to decreased oxygen levels	8	7.69231	0.00193226	ENSMUSG00000024924, ENSMUSG00000024935, ENSMUSG00000000628, ENSMUSG00000027750, ENSMUSG00000039782, ENSMUSG00000059201, ENSMUSG00000045382, ENSMUSG00000042429	93	375	19596	4.49514	0.996412	0.0921781	0.0890105
GOTERM_BP_FAT	GO:0065009~regulation of molecular function	25	24.0385	0.00208494	ENSMUSG00000056313, ENSMUSG00000027111, ENSMUSG00000059201, ENSMUSG00000096255, ENSMUSG00000042429, ENSMUSG00000006611, ENSMUSG00000002058, ENSMUSG00000024924, ENSMUSG00000030249, ENSMUSG00000038007, ENSMUSG00000055866, ENSMUSG00000063060, ENSMUSG00000018217, ENSMUSG00000057315, ENSMUSG00000028410, ENSMUSG00000029385, ENSMUSG00000020593, ENSMUSG00000000440, ENSMUSG00000066364, ENSMUSG00000024935,…	93	2803	19596	1.87932	0.997702	0.0961973	0.0928916
GOTERM_BP_FAT	GO:0015711~organic anion transport	9	8.65385	0.00211568	ENSMUSG00000024935, ENSMUSG00000059201, ENSMUSG00000027533, ENSMUSG00000042429, ENSMUSG00000010064, ENSMUSG00000054720, ENSMUSG00000009378, ENSMUSG00000055866, ENSMUSG00000000440	93	489	19596	3.87809	0.997899	0.0961973	0.0928916
GOTERM_BP_FAT	GO:0007399~nervous system development	24	23.0769	0.00206805	ENSMUSG00000030683, ENSMUSG00000030087, ENSMUSG00000032452, ENSMUSG00000027750, ENSMUSG00000027111, ENSMUSG00000059201, ENSMUSG00000042834, ENSMUSG00000096255, ENSMUSG00000020593, ENSMUSG00000002341, ENSMUSG00000026833, ENSMUSG00000000440, ENSMUSG00000002058, ENSMUSG00000045776, ENSMUSG00000024924, ENSMUSG00000024935, ENSMUSG00000021701, ENSMUSG00000066687, ENSMUSG00000023915, ENSMUSG00000045382,…	93	2636	19596	1.91845	0.997586	0.0961973	0.0928916
GOTERM_BP_FAT	GO:0051955~regulation of amino acid transport	4	3.84615	0.00231883	ENSMUSG00000059201, ENSMUSG00000042429, ENSMUSG00000010064, ENSMUSG00000055866	93	56	19596	15.0507	0.998838	0.0999893	0.0965533
GOTERM_BP_FAT	GO:0044723~single-organism carbohydrate metabolic process	9	8.65385	0.00228156	ENSMUSG00000023019, ENSMUSG00000000628, ENSMUSG00000020889, ENSMUSG00000067279, ENSMUSG00000059201, ENSMUSG00000027533, ENSMUSG00000030747, ENSMUSG00000055866, ENSMUSG00000049999	93	495	19596	3.83109	0.998705	0.0999893	0.0965533
GOTERM_BP_FAT	GO:0032270~positive regulation of cellular protein metabolic process	18	17.3077	0.00233652	ENSMUSG00000056313, ENSMUSG00000059201, ENSMUSG00000042429, ENSMUSG00000020593, ENSMUSG00000006611, ENSMUSG00000044338, ENSMUSG00000042249, ENSMUSG00000000440, ENSMUSG00000002058, ENSMUSG00000069049, ENSMUSG00000024924, ENSMUSG00000024935, ENSMUSG00000021701, ENSMUSG00000045382, ENSMUSG00000073565, ENSMUSG00000032911, ENSMUSG00000038007, ENSMUSG00000063060	93	1710	19596	2.218	0.998897	0.0999893	0.0965533
GOTERM_BP_FAT	GO:0010628~positive regulation of gene expression	21	20.1923	0.0022387	ENSMUSG00000031442, ENSMUSG00000030087, ENSMUSG00000026672, ENSMUSG00000027111, ENSMUSG00000020593, ENSMUSG00000006611, ENSMUSG00000026833, ENSMUSG00000000440, ENSMUSG00000022389, ENSMUSG00000021775, ENSMUSG00000003949, ENSMUSG00000069049, ENSMUSG00000066687, ENSMUSG00000037010, ENSMUSG00000020889, ENSMUSG00000038375, ENSMUSG00000073565, ENSMUSG00000010064, ENSMUSG00000063060, ENSMUSG00000018217,…	93	2167	19596	2.04195	0.998532	0.0999893	0.0965533
GOTERM_BP_FAT	GO:0046879~hormone secretion	8	7.69231	0.00237396	ENSMUSG00000037010, ENSMUSG00000026473, ENSMUSG00000020889, ENSMUSG00000059201, ENSMUSG00000042429, ENSMUSG00000006611, ENSMUSG00000055866, ENSMUSG00000000440	93	389	19596	4.33336	0.999011	0.100119	0.0966785
GOTERM_BP_FAT	GO:0071495~cellular response to endogenous stimulus	16	15.3846	0.00242193	ENSMUSG00000030087, ENSMUSG00000028410, ENSMUSG00000027750, ENSMUSG00000056673, ENSMUSG00000059201, ENSMUSG00000042834, ENSMUSG00000020593, ENSMUSG00000006611, ENSMUSG00000000440, ENSMUSG00000021775, ENSMUSG00000023019, ENSMUSG00000024935, ENSMUSG00000037010, ENSMUSG00000020889, ENSMUSG00000039782, ENSMUSG00000051596	93	1419	19596	2.37587	0.99914	0.100683	0.097223
GOTERM_BP_FAT	GO:0051952~regulation of amine transport	5	4.80769	0.002468	ENSMUSG00000059201, ENSMUSG00000042429, ENSMUSG00000010064, ENSMUSG00000049303, ENSMUSG00000055866	93	120	19596	8.77957	0.999248	0.101153	0.097677
GOTERM_BP_FAT	GO:0023057~negative regulation of signaling	16	15.3846	0.00286313	ENSMUSG00000057315, ENSMUSG00000056313, ENSMUSG00000026672, ENSMUSG00000028410, ENSMUSG00000027111, ENSMUSG00000059201, ENSMUSG00000096255, ENSMUSG00000042429, ENSMUSG00000044338, ENSMUSG00000042249, ENSMUSG00000000440, ENSMUSG00000026678, ENSMUSG00000021701, ENSMUSG00000037010, ENSMUSG00000020889, ENSMUSG00000051596	93	1444	19596	2.33473	0.999763	0.11109	0.107272
GOTERM_BP_FAT	GO:0015837~amine transport	5	4.80769	0.00286046	ENSMUSG00000059201, ENSMUSG00000042429, ENSMUSG00000010064, ENSMUSG00000049303, ENSMUSG00000055866	93	125	19596	8.42839	0.999761	0.11109	0.107272
GOTERM_BP_FAT	GO:0010648~negative regulation of cell communication	16	15.3846	0.00280689	ENSMUSG00000057315, ENSMUSG00000056313, ENSMUSG00000026672, ENSMUSG00000028410, ENSMUSG00000027111, ENSMUSG00000059201, ENSMUSG00000096255, ENSMUSG00000042429, ENSMUSG00000044338, ENSMUSG00000042249, ENSMUSG00000000440, ENSMUSG00000026678, ENSMUSG00000021701, ENSMUSG00000037010, ENSMUSG00000020889, ENSMUSG00000051596	93	1441	19596	2.33959	0.99972	0.11109	0.107272
GOTERM_BP_FAT	GO:0009914~hormone transport	8	7.69231	0.00277274	ENSMUSG00000037010, ENSMUSG00000026473, ENSMUSG00000020889, ENSMUSG00000059201, ENSMUSG00000042429, ENSMUSG00000006611, ENSMUSG00000055866, ENSMUSG00000000440	93	400	19596	4.21419	0.999691	0.11109	0.107272
GOTERM_BP_FAT	GO:0048585~negative regulation of response to stimulus	18	17.3077	0.00294081	ENSMUSG00000057315, ENSMUSG00000056313, ENSMUSG00000026672, ENSMUSG00000028410, ENSMUSG00000027111, ENSMUSG00000059201, ENSMUSG00000096255, ENSMUSG00000042429, ENSMUSG00000006611, ENSMUSG00000044338, ENSMUSG00000042249, ENSMUSG00000000440, ENSMUSG00000026678, ENSMUSG00000021775, ENSMUSG00000021701, ENSMUSG00000037010, ENSMUSG00000020889, ENSMUSG00000051596	93	1748	19596	2.16978	0.999811	0.112602	0.108732
GOTERM_BP_FAT	GO:0046394~carboxylic acid biosynthetic process	7	6.73077	0.00309914	ENSMUSG00000029059, ENSMUSG00000026473, ENSMUSG00000020889, ENSMUSG00000027533, ENSMUSG00000035376, ENSMUSG00000055866, ENSMUSG00000030246	93	304	19596	4.85187	0.999881	0.115622	0.111649
GOTERM_BP_FAT	GO:0016053~organic acid biosynthetic process	7	6.73077	0.00309914	ENSMUSG00000029059, ENSMUSG00000026473, ENSMUSG00000020889, ENSMUSG00000027533, ENSMUSG00000035376, ENSMUSG00000055866, ENSMUSG00000030246	93	304	19596	4.85187	0.999881	0.115622	0.111649
GOTERM_BP_FAT	GO:0030072~peptide hormone secretion	7	6.73077	0.00320067	ENSMUSG00000037010, ENSMUSG00000026473, ENSMUSG00000020889, ENSMUSG00000059201, ENSMUSG00000006611, ENSMUSG00000055866, ENSMUSG00000000440	93	306	19596	4.82016	0.999911	0.116424	0.112423
GOTERM_BP_FAT	GO:0019216~regulation of lipid metabolic process	8	7.69231	0.00317827	ENSMUSG00000021775, ENSMUSG00000020889, ENSMUSG00000059201, ENSMUSG00000027533, ENSMUSG00000030747, ENSMUSG00000042429, ENSMUSG00000020593, ENSMUSG00000000440	93	410	19596	4.11141	0.999905	0.116424	0.112423
GOTERM_BP_FAT	GO:0006898~receptor-mediated endocytosis	7	6.73077	0.00330466	ENSMUSG00000024924, ENSMUSG00000037010, ENSMUSG00000006611, ENSMUSG00000042249, ENSMUSG00000000440, ENSMUSG00000039735, ENSMUSG00000002058	93	308	19596	4.78886	0.999935	0.118723	0.114643
GOTERM_BP_FAT	GO:0050790~regulation of catalytic activity	20	19.2308	0.00340548	ENSMUSG00000057315, ENSMUSG00000056313, ENSMUSG00000028410, ENSMUSG00000027111, ENSMUSG00000029385, ENSMUSG00000059201, ENSMUSG00000096255, ENSMUSG00000042429, ENSMUSG00000020593, ENSMUSG00000000440, ENSMUSG00000002058, ENSMUSG00000066364, ENSMUSG00000024924, ENSMUSG00000024935, ENSMUSG00000066366, ENSMUSG00000039782, ENSMUSG00000032911, ENSMUSG00000038007, ENSMUSG00000063060, ENSMUSG00000018217	93	2086	19596	2.02023	0.999951	0.120853	0.1167
GOTERM_BP_FAT	GO:0009725~response to hormone	12	11.5385	0.00350377	ENSMUSG00000021775, ENSMUSG00000030087, ENSMUSG00000028410, ENSMUSG00000020889, ENSMUSG00000056673, ENSMUSG00000066366, ENSMUSG00000039782, ENSMUSG00000053907, ENSMUSG00000059201, ENSMUSG00000051596, ENSMUSG00000020593, ENSMUSG00000000440	93	909	19596	2.78165	0.999963	0.122843	0.118622
GOTERM_BP_FAT	GO:0044262~cellular carbohydrate metabolic process	7	6.73077	0.0036318	ENSMUSG00000000628, ENSMUSG00000020889, ENSMUSG00000067279, ENSMUSG00000059201, ENSMUSG00000030747, ENSMUSG00000055866, ENSMUSG00000049999	93	314	19596	4.69735	0.999975	0.124336	0.120063
GOTERM_BP_FAT	GO:0008015~blood circulation	9	8.65385	0.00362467	ENSMUSG00000024935, ENSMUSG00000027750, ENSMUSG00000037010, ENSMUSG00000059201, ENSMUSG00000045382, ENSMUSG00000030249, ENSMUSG00000042429, ENSMUSG00000055866, ENSMUSG00000000440	93	534	19596	3.55129	0.999974	0.124336	0.120063
GOTERM_BP_FAT	GO:0072330~monocarboxylic acid biosynthetic process	6	5.76923	0.00380004	ENSMUSG00000029059, ENSMUSG00000020889, ENSMUSG00000027533, ENSMUSG00000035376, ENSMUSG00000055866, ENSMUSG00000030246	93	220	19596	5.74663	0.999985	0.125463	0.121151
GOTERM_BP_FAT	GO:0051128~regulation of cellular component organization	25	24.0385	0.00384641	ENSMUSG00000027750, ENSMUSG00000027111, ENSMUSG00000096255, ENSMUSG00000006611, ENSMUSG00000002058, ENSMUSG00000024924, ENSMUSG00000045776, ENSMUSG00000037010, ENSMUSG00000039956, ENSMUSG00000055866, ENSMUSG00000018217, ENSMUSG00000039735, ENSMUSG00000057315, ENSMUSG00000032452, ENSMUSG00000026672, ENSMUSG00000020593, ENSMUSG00000002341, ENSMUSG00000044338, ENSMUSG00000026833, ENSMUSG00000000440,…	93	2935	19596	1.7948	0.999987	0.125463	0.121151
GOTERM_BP_FAT	GO:0048878~chemical homeostasis	15	14.4231	0.00386757	ENSMUSG00000030087, ENSMUSG00000059201, ENSMUSG00000027533, ENSMUSG00000096255, ENSMUSG00000042429, ENSMUSG00000006611, ENSMUSG00000044338, ENSMUSG00000000440, ENSMUSG00000021775, ENSMUSG00000024935, ENSMUSG00000000628, ENSMUSG00000020889, ENSMUSG00000045382, ENSMUSG00000030747, ENSMUSG00000038217	93	1343	19596	2.35342	0.999987	0.125463	0.121151
GOTERM_BP_FAT	GO:0008285~negative regulation of cell proliferation	11	10.5769	0.00388029	ENSMUSG00000096768, ENSMUSG00000026672, ENSMUSG00000066687, ENSMUSG00000037010, ENSMUSG00000023915, ENSMUSG00000042429, ENSMUSG00000055866, ENSMUSG00000000440, ENSMUSG00000063060, ENSMUSG00000026678, ENSMUSG00000018217	93	789	19596	2.93765	0.999988	0.125463	0.121151
GOTERM_BP_FAT	GO:0006366~transcription from RNA polymerase II promoter	20	19.2308	0.00386551	ENSMUSG00000031442, ENSMUSG00000035877, ENSMUSG00000030087, ENSMUSG00000027111, ENSMUSG00000059201, ENSMUSG00000003038, ENSMUSG00000020593, ENSMUSG00000028957, ENSMUSG00000006611, ENSMUSG00000049327, ENSMUSG00000000440, ENSMUSG00000022389, ENSMUSG00000021775, ENSMUSG00000003949, ENSMUSG00000066687, ENSMUSG00000037010, ENSMUSG00000020889, ENSMUSG00000010064, ENSMUSG00000055866, ENSMUSG00000059824	93	2110	19596	1.99725	0.999987	0.125463	0.121151
GOTERM_BP_FAT	GO:0051247~positive regulation of protein metabolic process	18	17.3077	0.00395319	ENSMUSG00000056313, ENSMUSG00000059201, ENSMUSG00000042429, ENSMUSG00000020593, ENSMUSG00000006611, ENSMUSG00000044338, ENSMUSG00000042249, ENSMUSG00000000440, ENSMUSG00000002058, ENSMUSG00000069049, ENSMUSG00000024924, ENSMUSG00000024935, ENSMUSG00000021701, ENSMUSG00000045382, ENSMUSG00000073565, ENSMUSG00000032911, ENSMUSG00000038007, ENSMUSG00000063060	93	1799	19596	2.10827	0.99999	0.126415	0.122071
GOTERM_BP_FAT	GO:0023061~signal release	9	8.65385	0.00409695	ENSMUSG00000037010, ENSMUSG00000026473, ENSMUSG00000020889, ENSMUSG00000059201, ENSMUSG00000042429, ENSMUSG00000049303, ENSMUSG00000006611, ENSMUSG00000055866, ENSMUSG00000000440	93	545	19596	3.47961	0.999994	0.128195	0.12379
GOTERM_BP_FAT	GO:0003013~circulatory system process	9	8.65385	0.00409695	ENSMUSG00000024935, ENSMUSG00000027750, ENSMUSG00000037010, ENSMUSG00000059201, ENSMUSG00000045382, ENSMUSG00000030249, ENSMUSG00000042429, ENSMUSG00000055866, ENSMUSG00000000440	93	545	19596	3.47961	0.999994	0.128195	0.12379
GOTERM_BP_FAT	GO:0006066~alcohol metabolic process	7	6.73077	0.00416697	ENSMUSG00000024747, ENSMUSG00000024924, ENSMUSG00000059201, ENSMUSG00000030747, ENSMUSG00000038007, ENSMUSG00000042249, ENSMUSG00000018217	93	323	19596	4.56646	0.999995	0.128999	0.124566
GOTERM_BP_FAT	GO:0090087~regulation of peptide transport	10	9.61538	0.00429254	ENSMUSG00000024935, ENSMUSG00000028410, ENSMUSG00000037010, ENSMUSG00000026473, ENSMUSG00000020889, ENSMUSG00000059201, ENSMUSG00000042429, ENSMUSG00000006611, ENSMUSG00000055866, ENSMUSG00000000440	93	672	19596	3.13556	0.999996	0.129026	0.124592
GOTERM_BP_FAT	GO:0043549~regulation of kinase activity	11	10.5769	0.00438955	ENSMUSG00000024924, ENSMUSG00000024935, ENSMUSG00000056313, ENSMUSG00000028410, ENSMUSG00000029385, ENSMUSG00000059201, ENSMUSG00000042429, ENSMUSG00000032911, ENSMUSG00000000440, ENSMUSG00000018217, ENSMUSG00000002058	93	803	19596	2.88643	0.999997	0.129026	0.124592
GOTERM_BP_FAT	GO:0035357~peroxisome proliferator activated receptor signaling pathway	3	2.88462	0.00432025	ENSMUSG00000059201, ENSMUSG00000027533, ENSMUSG00000000440	93	21	19596	30.1014	0.999997	0.129026	0.124592
GOTERM_BP_FAT	GO:0033692~cellular polysaccharide biosynthetic process	4	3.84615	0.00436787	ENSMUSG00000020889, ENSMUSG00000067279, ENSMUSG00000055866, ENSMUSG00000049999	93	70	19596	12.0406	0.999997	0.129026	0.124592
GOTERM_BP_FAT	GO:0008217~regulation of blood pressure	6	5.76923	0.00425836	ENSMUSG00000027750, ENSMUSG00000037010, ENSMUSG00000059201, ENSMUSG00000030249, ENSMUSG00000042429, ENSMUSG00000000440	93	226	19596	5.59406	0.999996	0.129026	0.124592
GOTERM_BP_FAT	GO:0070887~cellular response to chemical stimulus	28	26.9231	0.00461313	ENSMUSG00000030087, ENSMUSG00000027750, ENSMUSG00000027111, ENSMUSG00000056673, ENSMUSG00000059201, ENSMUSG00000049303, ENSMUSG00000006611, ENSMUSG00000023019, ENSMUSG00000021775, ENSMUSG00000024924, ENSMUSG00000037010, ENSMUSG00000020889, ENSMUSG00000053907, ENSMUSG00000023915, ENSMUSG00000030747, ENSMUSG00000038007, ENSMUSG00000018217, ENSMUSG00000020190, ENSMUSG00000028410, ENSMUSG00000026672,…	93	3498	19596	1.68664	0.999999	0.133196	0.128619
GOTERM_BP_FAT	GO:0010605~negative regulation of macromolecule metabolic process	25	24.0385	0.00462295	ENSMUSG00000035877, ENSMUSG00000030087, ENSMUSG00000059201, ENSMUSG00000096255, ENSMUSG00000006611, ENSMUSG00000049327, ENSMUSG00000021775, ENSMUSG00000037010, ENSMUSG00000020889, ENSMUSG00000038007, ENSMUSG00000055866, ENSMUSG00000063060, ENSMUSG00000018217, ENSMUSG00000028410, ENSMUSG00000026672, ENSMUSG00000003038, ENSMUSG00000020593, ENSMUSG00000028957, ENSMUSG00000044338, ENSMUSG00000026833,…	93	2977	19596	1.76948	0.999999	0.133196	0.128619
GOTERM_BP_FAT	GO:0071705~nitrogen compound transport	20	19.2308	0.00530061	ENSMUSG00000026672, ENSMUSG00000028410, ENSMUSG00000026473, ENSMUSG00000059201, ENSMUSG00000096255, ENSMUSG00000042429, ENSMUSG00000049303, ENSMUSG00000006611, ENSMUSG00000009378, ENSMUSG00000042249, ENSMUSG00000000440, ENSMUSG00000002058, ENSMUSG00000024924, ENSMUSG00000024935, ENSMUSG00000037010, ENSMUSG00000020889, ENSMUSG00000067279, ENSMUSG00000010064, ENSMUSG00000054720, ENSMUSG00000055866	93	2172	19596	1.94024	1	0.134129	0.129519
GOTERM_BP_FAT	GO:0071310~cellular response to organic substance	24	23.0769	0.00521435	ENSMUSG00000030087, ENSMUSG00000026672, ENSMUSG00000028410, ENSMUSG00000027750, ENSMUSG00000027111, ENSMUSG00000056673, ENSMUSG00000059201, ENSMUSG00000042834, ENSMUSG00000020593, ENSMUSG00000006611, ENSMUSG00000000440, ENSMUSG00000021775, ENSMUSG00000023019, ENSMUSG00000024935, ENSMUSG00000000628, ENSMUSG00000037010, ENSMUSG00000020889, ENSMUSG00000039782, ENSMUSG00000023915, ENSMUSG00000053907,…	93	2834	19596	1.78442	1	0.134129	0.129519
GOTERM_BP_FAT	GO:0051049~regulation of transport	19	18.2692	0.00524959	ENSMUSG00000030087, ENSMUSG00000028410, ENSMUSG00000026473, ENSMUSG00000059201, ENSMUSG00000027533, ENSMUSG00000042429, ENSMUSG00000049303, ENSMUSG00000006611, ENSMUSG00000044338, ENSMUSG00000000440, ENSMUSG00000002058, ENSMUSG00000024935, ENSMUSG00000000628, ENSMUSG00000037010, ENSMUSG00000020889, ENSMUSG00000045382, ENSMUSG00000030249, ENSMUSG00000010064, ENSMUSG00000055866	93	2009	19596	1.99277	1	0.134129	0.129519
GOTERM_BP_FAT	GO:0044042~glucan metabolic process	4	3.84615	0.00529809	ENSMUSG00000020889, ENSMUSG00000067279, ENSMUSG00000055866, ENSMUSG00000049999	93	75	19596	11.2378	1	0.134129	0.129519
GOTERM_BP_FAT	GO:0043068~positive regulation of programmed cell death	10	9.61538	0.0049509	ENSMUSG00000024935, ENSMUSG00000026672, ENSMUSG00000066687, ENSMUSG00000028410, ENSMUSG00000027111, ENSMUSG00000059201, ENSMUSG00000026833, ENSMUSG00000038007, ENSMUSG00000000440, ENSMUSG00000063060	93	687	19596	3.0671	0.999999	0.134129	0.129519
GOTERM_BP_FAT	GO:0043065~positive regulation of apoptotic process	10	9.61538	0.00472325	ENSMUSG00000024935, ENSMUSG00000026672, ENSMUSG00000066687, ENSMUSG00000028410, ENSMUSG00000027111, ENSMUSG00000059201, ENSMUSG00000026833, ENSMUSG00000038007, ENSMUSG00000000440, ENSMUSG00000063060	93	682	19596	3.08958	0.999999	0.134129	0.129519
GOTERM_BP_FAT	GO:0033554~cellular response to stress	19	18.2692	0.0048301	ENSMUSG00000056313, ENSMUSG00000026672, ENSMUSG00000028410, ENSMUSG00000026473, ENSMUSG00000059201, ENSMUSG00000042834, ENSMUSG00000006611, ENSMUSG00000049327, ENSMUSG00000000440, ENSMUSG00000024924, ENSMUSG00000024935, ENSMUSG00000000628, ENSMUSG00000045102, ENSMUSG00000021701, ENSMUSG00000039782, ENSMUSG00000010064, ENSMUSG00000054720, ENSMUSG00000038007, ENSMUSG00000018217	93	1993	19596	2.00877	0.999999	0.134129	0.129519
GOTERM_BP_FAT	GO:0031669~cellular response to nutrient levels	6	5.76923	0.00519915	ENSMUSG00000027750, ENSMUSG00000026473, ENSMUSG00000059201, ENSMUSG00000010064, ENSMUSG00000006611, ENSMUSG00000000440	93	237	19596	5.33442	1	0.134129	0.129519
GOTERM_BP_FAT	GO:0031329~regulation of cellular catabolic process	10	9.61538	0.00528392	ENSMUSG00000023019, ENSMUSG00000000628, ENSMUSG00000021701, ENSMUSG00000026672, ENSMUSG00000067279, ENSMUSG00000038375, ENSMUSG00000059201, ENSMUSG00000006611, ENSMUSG00000038007, ENSMUSG00000049999	93	694	19596	3.03616	1	0.134129	0.129519
GOTERM_BP_FAT	GO:0010243~response to organonitrogen compound	13	12.5	0.00487267	ENSMUSG00000030087, ENSMUSG00000059201, ENSMUSG00000042429, ENSMUSG00000020593, ENSMUSG00000000440, ENSMUSG00000023019, ENSMUSG00000024935, ENSMUSG00000066366, ENSMUSG00000039782, ENSMUSG00000053907, ENSMUSG00000045382, ENSMUSG00000030249, ENSMUSG00000051596	93	1089	19596	2.51536	0.999999	0.134129	0.129519
GOTERM_BP_FAT	GO:0006073~cellular glucan metabolic process	4	3.84615	0.00510331	ENSMUSG00000020889, ENSMUSG00000067279, ENSMUSG00000055866, ENSMUSG00000049999	93	74	19596	11.3897	1	0.134129	0.129519
GOTERM_BP_FAT	GO:0005977~glycogen metabolic process	4	3.84615	0.00510331	ENSMUSG00000020889, ENSMUSG00000067279, ENSMUSG00000055866, ENSMUSG00000049999	93	74	19596	11.3897	1	0.134129	0.129519
GOTERM_BP_FAT	GO:0001932~regulation of protein phosphorylation	16	15.3846	0.00504077	ENSMUSG00000056313, ENSMUSG00000028410, ENSMUSG00000029385, ENSMUSG00000059201, ENSMUSG00000096255, ENSMUSG00000042429, ENSMUSG00000006611, ENSMUSG00000044338, ENSMUSG00000042249, ENSMUSG00000000440, ENSMUSG00000002058, ENSMUSG00000024924, ENSMUSG00000024935, ENSMUSG00000045382, ENSMUSG00000032911, ENSMUSG00000018217	93	1534	19596	2.19775	1	0.134129	0.129519
GOTERM_BP_FAT	GO:0001666~response to hypoxia	7	6.73077	0.00518588	ENSMUSG00000024924, ENSMUSG00000000628, ENSMUSG00000027750, ENSMUSG00000039782, ENSMUSG00000059201, ENSMUSG00000045382, ENSMUSG00000042429	93	338	19596	4.36381	1	0.134129	0.129519
GOTERM_BP_FAT	GO:1901566~organonitrogen compound biosynthetic process	15	14.4231	0.00540409	ENSMUSG00000026473, ENSMUSG00000027533, ENSMUSG00000000440, ENSMUSG00000064339, ENSMUSG00000064372, ENSMUSG00000069049, ENSMUSG00000024935, ENSMUSG00000064354, ENSMUSG00000100862, ENSMUSG00000039782, ENSMUSG00000018846, ENSMUSG00000035376, ENSMUSG00000073565, ENSMUSG00000038007, ENSMUSG00000055866	93	1395	19596	2.2657	1	0.134552	0.129929
GOTERM_BP_FAT	GO:0045765~regulation of angiogenesis	7	6.73077	0.00540984	ENSMUSG00000000628, ENSMUSG00000021701, ENSMUSG00000026473, ENSMUSG00000059201, ENSMUSG00000045382, ENSMUSG00000044338, ENSMUSG00000000440	93	341	19596	4.32542	1	0.134552	0.129929
GOTERM_BP_FAT	GO:0045598~regulation of fat cell differentiation	5	4.80769	0.00560206	ENSMUSG00000066687, ENSMUSG00000020889, ENSMUSG00000059201, ENSMUSG00000020593, ENSMUSG00000000440	93	151	19596	6.97714	1	0.138152	0.133405
GOTERM_BP_FAT	GO:0000271~polysaccharide biosynthetic process	4	3.84615	0.00590907	ENSMUSG00000020889, ENSMUSG00000067279, ENSMUSG00000055866, ENSMUSG00000049999	93	78	19596	10.8056	1	0.144499	0.139534
GOTERM_BP_FAT	GO:0032870~cellular response to hormone stimulus	9	8.65385	0.00667297	ENSMUSG00000021775, ENSMUSG00000028410, ENSMUSG00000020889, ENSMUSG00000056673, ENSMUSG00000039782, ENSMUSG00000059201, ENSMUSG00000051596, ENSMUSG00000020593, ENSMUSG00000000440	93	592	19596	3.20336	1	0.160223	0.154717
GOTERM_BP_FAT	GO:0031328~positive regulation of cellular biosynthetic process	19	18.2692	0.00669279	ENSMUSG00000031442, ENSMUSG00000030087, ENSMUSG00000027111, ENSMUSG00000020593, ENSMUSG00000000440, ENSMUSG00000022389, ENSMUSG00000021775, ENSMUSG00000003949, ENSMUSG00000069049, ENSMUSG00000064354, ENSMUSG00000066687, ENSMUSG00000037010, ENSMUSG00000020889, ENSMUSG00000038375, ENSMUSG00000030747, ENSMUSG00000073565, ENSMUSG00000010064, ENSMUSG00000063060, ENSMUSG00000059824	93	2057	19596	1.94627	1	0.160223	0.154717
GOTERM_BP_FAT	GO:0006631~fatty acid metabolic process	8	7.69231	0.00671726	ENSMUSG00000029059, ENSMUSG00000059201, ENSMUSG00000027533, ENSMUSG00000030747, ENSMUSG00000035376, ENSMUSG00000020593, ENSMUSG00000055866, ENSMUSG00000000440	93	471	19596	3.57893	1	0.160223	0.154717
GOTERM_BP_FAT	GO:0031324~negative regulation of cellular metabolic process	24	23.0769	0.00687888	ENSMUSG00000035877, ENSMUSG00000030087, ENSMUSG00000026672, ENSMUSG00000028410, ENSMUSG00000059201, ENSMUSG00000003038, ENSMUSG00000096255, ENSMUSG00000020593, ENSMUSG00000028957, ENSMUSG00000006611, ENSMUSG00000026833, ENSMUSG00000049327, ENSMUSG00000000440, ENSMUSG00000066364, ENSMUSG00000021775, ENSMUSG00000000628, ENSMUSG00000066687, ENSMUSG00000020889, ENSMUSG00000066366, ENSMUSG00000039782,…	93	2899	19596	1.74441	1	0.162744	0.157152
GOTERM_BP_FAT	GO:0002790~peptide secretion	8	7.69231	0.00702337	ENSMUSG00000037010, ENSMUSG00000026473, ENSMUSG00000020889, ENSMUSG00000059201, ENSMUSG00000042429, ENSMUSG00000006611, ENSMUSG00000055866, ENSMUSG00000000440	93	475	19596	3.54879	1	0.164823	0.159159
GOTERM_BP_FAT	GO:0055081~anion homeostasis	4	3.84615	0.00725327	ENSMUSG00000024935, ENSMUSG00000030747, ENSMUSG00000042429, ENSMUSG00000038217	93	84	19596	10.0338	1	0.164899	0.159232
GOTERM_BP_FAT	GO:0009894~regulation of catabolic process	11	10.5769	0.00720127	ENSMUSG00000023019, ENSMUSG00000000628, ENSMUSG00000021701, ENSMUSG00000026672, ENSMUSG00000067279, ENSMUSG00000038375, ENSMUSG00000059201, ENSMUSG00000042429, ENSMUSG00000006611, ENSMUSG00000038007, ENSMUSG00000049999	93	863	19596	2.68575	1	0.164899	0.159232
GOTERM_BP_FAT	GO:0006732~coenzyme metabolic process	7	6.73077	0.00708861	ENSMUSG00000023019, ENSMUSG00000032279, ENSMUSG00000000628, ENSMUSG00000053907, ENSMUSG00000018846, ENSMUSG00000030747, ENSMUSG00000030246	93	361	19596	4.08578	1	0.164899	0.159232
GOTERM_BP_FAT	GO:0006629~lipid metabolic process	15	14.4231	0.00714612	ENSMUSG00000029059, ENSMUSG00000059201, ENSMUSG00000027533, ENSMUSG00000042429, ENSMUSG00000020593, ENSMUSG00000000440, ENSMUSG00000021775, ENSMUSG00000023019, ENSMUSG00000024924, ENSMUSG00000020889, ENSMUSG00000030747, ENSMUSG00000035376, ENSMUSG00000038007, ENSMUSG00000055866, ENSMUSG00000018217	93	1441	19596	2.19337	1	0.164899	0.159232
GOTERM_BP_FAT	GO:0050767~regulation of neurogenesis	12	11.5385	0.0073586	ENSMUSG00000024924, ENSMUSG00000021701, ENSMUSG00000027111, ENSMUSG00000023915, ENSMUSG00000042834, ENSMUSG00000045382, ENSMUSG00000096255, ENSMUSG00000032911, ENSMUSG00000026833, ENSMUSG00000055866, ENSMUSG00000000440, ENSMUSG00000018217	93	1005	19596	2.51594	1	0.165996	0.160292
GOTERM_BP_FAT	GO:1904706~negative regulation of vascular smooth muscle cell proliferation	3	2.88462	0.00761254	ENSMUSG00000037010, ENSMUSG00000000440, ENSMUSG00000026678	93	28	19596	22.576	1	0.170404	0.164548
GOTERM_BP_FAT	GO:0044057~regulation of system process	9	8.65385	0.00800735	ENSMUSG00000024935, ENSMUSG00000037010, ENSMUSG00000023915, ENSMUSG00000059201, ENSMUSG00000027533, ENSMUSG00000030249, ENSMUSG00000042429, ENSMUSG00000020593, ENSMUSG00000055866	93	611	19596	3.10374	1	0.177873	0.171761
GOTERM_BP_FAT	GO:0071295~cellular response to vitamin	3	2.88462	0.00815162	ENSMUSG00000027750, ENSMUSG00000059201, ENSMUSG00000000440	93	29	19596	21.7976	1	0.178445	0.172313
GOTERM_BP_FAT	GO:0060284~regulation of cell development	13	12.5	0.00815574	ENSMUSG00000027750, ENSMUSG00000027111, ENSMUSG00000042834, ENSMUSG00000096255, ENSMUSG00000026833, ENSMUSG00000000440, ENSMUSG00000024924, ENSMUSG00000021701, ENSMUSG00000023915, ENSMUSG00000045382, ENSMUSG00000032911, ENSMUSG00000055866, ENSMUSG00000018217	93	1164	19596	2.35329	1	0.178445	0.172313
GOTERM_BP_FAT	GO:0009755~hormone-mediated signaling pathway	5	4.80769	0.0082839	ENSMUSG00000021775, ENSMUSG00000028410, ENSMUSG00000020889, ENSMUSG00000056673, ENSMUSG00000000440	93	169	19596	6.23401	1	0.179897	0.173715
GOTERM_BP_FAT	GO:0009891~positive regulation of biosynthetic process	19	18.2692	0.00836729	ENSMUSG00000031442, ENSMUSG00000030087, ENSMUSG00000027111, ENSMUSG00000020593, ENSMUSG00000000440, ENSMUSG00000022389, ENSMUSG00000021775, ENSMUSG00000003949, ENSMUSG00000069049, ENSMUSG00000064354, ENSMUSG00000066687, ENSMUSG00000037010, ENSMUSG00000020889, ENSMUSG00000038375, ENSMUSG00000030747, ENSMUSG00000073565, ENSMUSG00000010064, ENSMUSG00000063060, ENSMUSG00000059824	93	2103	19596	1.9037	1	0.180362	0.174164
GOTERM_BP_FAT	GO:0071496~cellular response to external stimulus	7	6.73077	0.00846961	ENSMUSG00000027750, ENSMUSG00000027111, ENSMUSG00000026473, ENSMUSG00000059201, ENSMUSG00000010064, ENSMUSG00000006611, ENSMUSG00000000440	93	375	19596	3.93325	1	0.181225	0.174997
GOTERM_BP_FAT	GO:1901342~regulation of vasculature development	7	6.73077	0.00878905	ENSMUSG00000000628, ENSMUSG00000021701, ENSMUSG00000026473, ENSMUSG00000059201, ENSMUSG00000045382, ENSMUSG00000044338, ENSMUSG00000000440	93	378	19596	3.90203	1	0.182687	0.176409
GOTERM_BP_FAT	GO:0051961~negative regulation of nervous system development	7	6.73077	0.00868163	ENSMUSG00000021701, ENSMUSG00000023915, ENSMUSG00000096255, ENSMUSG00000020593, ENSMUSG00000032911, ENSMUSG00000026833, ENSMUSG00000018217	93	377	19596	3.91238	1	0.182687	0.176409
GOTERM_BP_FAT	GO:0032890~regulation of organic acid transport	4	3.84615	0.00876458	ENSMUSG00000059201, ENSMUSG00000042429, ENSMUSG00000010064, ENSMUSG00000055866	93	90	19596	9.36487	1	0.182687	0.176409
GOTERM_BP_FAT	GO:0006835~dicarboxylic acid transport	4	3.84615	0.00876458	ENSMUSG00000024935, ENSMUSG00000042429, ENSMUSG00000054720, ENSMUSG00000055866	93	90	19596	9.36487	1	0.182687	0.176409
GOTERM_BP_FAT	GO:2000485~regulation of glutamine transport	2	1.92308	0.00936787	ENSMUSG00000059201, ENSMUSG00000010064	93	2	19596	210.71	1	0.187833	0.181379
GOTERM_BP_FAT	GO:1903522~regulation of blood circulation	6	5.76923	0.00930206	ENSMUSG00000024935, ENSMUSG00000037010, ENSMUSG00000059201, ENSMUSG00000030249, ENSMUSG00000042429, ENSMUSG00000055866	93	273	19596	4.63098	1	0.187833	0.181379
GOTERM_BP_FAT	GO:0022401~negative adaptation of signaling pathway	3	2.88462	0.00927967	ENSMUSG00000037010, ENSMUSG00000044338, ENSMUSG00000042249	93	31	19596	20.3913	1	0.187833	0.181379
GOTERM_BP_FAT	GO:0010827~regulation of glucose transport	4	3.84615	0.00930625	ENSMUSG00000030087, ENSMUSG00000000628, ENSMUSG00000059201, ENSMUSG00000027533	93	92	19596	9.16129	1	0.187833	0.181379
GOTERM_BP_FAT	GO:0008219~cell death	20	19.2308	0.00942395	ENSMUSG00000056313, ENSMUSG00000026672, ENSMUSG00000020190, ENSMUSG00000028410, ENSMUSG00000027111, ENSMUSG00000059201, ENSMUSG00000096255, ENSMUSG00000042429, ENSMUSG00000026833, ENSMUSG00000000440, ENSMUSG00000024935, ENSMUSG00000000628, ENSMUSG00000021701, ENSMUSG00000064354, ENSMUSG00000066687, ENSMUSG00000023915, ENSMUSG00000045382, ENSMUSG00000038007, ENSMUSG00000063060, ENSMUSG00000018217	93	2294	19596	1.83705	1	0.187833	0.181379
GOTERM_BP_FAT	GO:0002029~desensitization of G-protein coupled receptor protein signaling pathway	3	2.88462	0.00927967	ENSMUSG00000037010, ENSMUSG00000044338, ENSMUSG00000042249	93	31	19596	20.3913	1	0.187833	0.181379
GOTERM_BP_FAT	GO:0006820~anion transport	9	8.65385	0.00953405	ENSMUSG00000024935, ENSMUSG00000059201, ENSMUSG00000027533, ENSMUSG00000042429, ENSMUSG00000010064, ENSMUSG00000054720, ENSMUSG00000009378, ENSMUSG00000055866, ENSMUSG00000000440	93	630	19596	3.01014	1	0.188735	0.182249
GOTERM_BP_FAT	GO:0045595~regulation of cell differentiation	19	18.2692	0.00972233	ENSMUSG00000035877, ENSMUSG00000027750, ENSMUSG00000027111, ENSMUSG00000059201, ENSMUSG00000042834, ENSMUSG00000096255, ENSMUSG00000020593, ENSMUSG00000026833, ENSMUSG00000000440, ENSMUSG00000021775, ENSMUSG00000024924, ENSMUSG00000021701, ENSMUSG00000066687, ENSMUSG00000020889, ENSMUSG00000023915, ENSMUSG00000045382, ENSMUSG00000032911, ENSMUSG00000055866, ENSMUSG00000018217	93	2135	19596	1.87517	1	0.191162	0.184593
GOTERM_BP_FAT	GO:0006468~protein phosphorylation	18	17.3077	0.00994814	ENSMUSG00000056313, ENSMUSG00000020190, ENSMUSG00000028410, ENSMUSG00000029385, ENSMUSG00000059201, ENSMUSG00000096255, ENSMUSG00000042429, ENSMUSG00000006611, ENSMUSG00000044338, ENSMUSG00000042249, ENSMUSG00000000440, ENSMUSG00000002058, ENSMUSG00000024924, ENSMUSG00000024935, ENSMUSG00000021701, ENSMUSG00000045382, ENSMUSG00000032911, ENSMUSG00000018217	93	1976	19596	1.91942	1	0.194289	0.187613
GOTERM_BP_FAT	GO:0010033~response to organic substance	29	27.8846	0.010044	ENSMUSG00000030087, ENSMUSG00000027750, ENSMUSG00000027111, ENSMUSG00000056673, ENSMUSG00000059201, ENSMUSG00000042429, ENSMUSG00000006611, ENSMUSG00000023019, ENSMUSG00000021775, ENSMUSG00000037010, ENSMUSG00000020889, ENSMUSG00000053907, ENSMUSG00000023915, ENSMUSG00000030747, ENSMUSG00000030249, ENSMUSG00000038007, ENSMUSG00000018217, ENSMUSG00000028410, ENSMUSG00000026672, ENSMUSG00000026473,…	93	3886	19596	1.57246	1	0.194854	0.188158
GOTERM_BP_FAT	GO:0055088~lipid homeostasis	5	4.80769	0.0102775	ENSMUSG00000021775, ENSMUSG00000020889, ENSMUSG00000030747, ENSMUSG00000042429, ENSMUSG00000038217	93	180	19596	5.85305	1	0.196761	0.189999
GOTERM_BP_FAT	GO:0014074~response to purine-containing compound	5	4.80769	0.0102775	ENSMUSG00000023019, ENSMUSG00000053907, ENSMUSG00000030249, ENSMUSG00000042429, ENSMUSG00000000440	93	180	19596	5.85305	1	0.196761	0.189999
GOTERM_BP_FAT	GO:0042749~regulation of circadian sleep/wake cycle	3	2.88462	0.0104731	ENSMUSG00000020889, ENSMUSG00000042429, ENSMUSG00000028957	93	33	19596	19.1554	1	0.197902	0.191101
GOTERM_BP_FAT	GO:0023058~adaptation of signaling pathway	3	2.88462	0.0104731	ENSMUSG00000037010, ENSMUSG00000044338, ENSMUSG00000042249	93	33	19596	19.1554	1	0.197902	0.191101
GOTERM_BP_FAT	GO:0060341~regulation of cellular localization	12	11.5385	0.0110986	ENSMUSG00000024935, ENSMUSG00000028410, ENSMUSG00000026473, ENSMUSG00000020889, ENSMUSG00000038375, ENSMUSG00000059201, ENSMUSG00000049303, ENSMUSG00000006611, ENSMUSG00000044338, ENSMUSG00000039956, ENSMUSG00000055866, ENSMUSG00000000440	93	1065	19596	2.37419	1	0.208367	0.201207
GOTERM_BP_FAT	GO:0051338~regulation of transferase activity	11	10.5769	0.0113311	ENSMUSG00000024924, ENSMUSG00000024935, ENSMUSG00000056313, ENSMUSG00000028410, ENSMUSG00000029385, ENSMUSG00000059201, ENSMUSG00000042429, ENSMUSG00000032911, ENSMUSG00000000440, ENSMUSG00000018217, ENSMUSG00000002058	93	924	19596	2.50845	1	0.210447	0.203215
GOTERM_BP_FAT	GO:0044264~cellular polysaccharide metabolic process	4	3.84615	0.011354	ENSMUSG00000020889, ENSMUSG00000067279, ENSMUSG00000055866, ENSMUSG00000049999	93	99	19596	8.51352	1	0.210447	0.203215
GOTERM_BP_FAT	GO:0001934~positive regulation of protein phosphorylation	12	11.5385	0.0114664	ENSMUSG00000024924, ENSMUSG00000024935, ENSMUSG00000056313, ENSMUSG00000059201, ENSMUSG00000045382, ENSMUSG00000042429, ENSMUSG00000032911, ENSMUSG00000006611, ENSMUSG00000044338, ENSMUSG00000042249, ENSMUSG00000000440, ENSMUSG00000002058	93	1070	19596	2.3631	1	0.211185	0.203928
GOTERM_BP_FAT	GO:0051173~positive regulation of nitrogen compound metabolic process	19	18.2692	0.0117127	ENSMUSG00000031442, ENSMUSG00000030087, ENSMUSG00000027111, ENSMUSG00000020593, ENSMUSG00000000440, ENSMUSG00000022389, ENSMUSG00000021775, ENSMUSG00000003949, ENSMUSG00000023019, ENSMUSG00000069049, ENSMUSG00000064354, ENSMUSG00000066687, ENSMUSG00000037010, ENSMUSG00000020889, ENSMUSG00000038375, ENSMUSG00000073565, ENSMUSG00000010064, ENSMUSG00000063060, ENSMUSG00000059824	93	2176	19596	1.83984	1	0.212211	0.204918
GOTERM_BP_FAT	GO:0042886~amide transport	17	16.3462	0.0117409	ENSMUSG00000026672, ENSMUSG00000028410, ENSMUSG00000026473, ENSMUSG00000059201, ENSMUSG00000096255, ENSMUSG00000042429, ENSMUSG00000006611, ENSMUSG00000042249, ENSMUSG00000000440, ENSMUSG00000002058, ENSMUSG00000024924, ENSMUSG00000024935, ENSMUSG00000037010, ENSMUSG00000020889, ENSMUSG00000067279, ENSMUSG00000010064, ENSMUSG00000055866	93	1848	19596	1.93835	1	0.212211	0.204918
GOTERM_BP_FAT	GO:0006811~ion transport	16	15.3846	0.0117216	ENSMUSG00000059201, ENSMUSG00000027533, ENSMUSG00000042429, ENSMUSG00000049303, ENSMUSG00000006611, ENSMUSG00000044338, ENSMUSG00000009378, ENSMUSG00000000440, ENSMUSG00000024935, ENSMUSG00000100862, ENSMUSG00000045382, ENSMUSG00000030249, ENSMUSG00000010064, ENSMUSG00000051596, ENSMUSG00000054720, ENSMUSG00000055866	93	1687	19596	1.99843	1	0.212211	0.204918
GOTERM_BP_FAT	GO:0032868~response to insulin	6	5.76923	0.012184	ENSMUSG00000030087, ENSMUSG00000039782, ENSMUSG00000059201, ENSMUSG00000051596, ENSMUSG00000020593, ENSMUSG00000000440	93	292	19596	4.32965	1	0.21886	0.211339
GOTERM_BP_FAT	GO:0015718~monocarboxylic acid transport	5	4.80769	0.0123394	ENSMUSG00000059201, ENSMUSG00000027533, ENSMUSG00000010064, ENSMUSG00000009378, ENSMUSG00000000440	93	190	19596	5.54499	1	0.218949	0.211425
GOTERM_BP_FAT	GO:0007610~behavior	10	9.61538	0.0123011	ENSMUSG00000030683, ENSMUSG00000021775, ENSMUSG00000024935, ENSMUSG00000021701, ENSMUSG00000037010, ENSMUSG00000020889, ENSMUSG00000059201, ENSMUSG00000042429, ENSMUSG00000028957, ENSMUSG00000018217	93	795	19596	2.65044	1	0.218949	0.211425
GOTERM_BP_FAT	GO:0042592~homeostatic process	18	17.3077	0.0131599	ENSMUSG00000030087, ENSMUSG00000054690, ENSMUSG00000059201, ENSMUSG00000027533, ENSMUSG00000096255, ENSMUSG00000042429, ENSMUSG00000006611, ENSMUSG00000044338, ENSMUSG00000000440, ENSMUSG00000021775, ENSMUSG00000024935, ENSMUSG00000000628, ENSMUSG00000037010, ENSMUSG00000020889, ENSMUSG00000038375, ENSMUSG00000045382, ENSMUSG00000030747, ENSMUSG00000038217	93	2036	19596	1.86286	1	0.232092	0.224116
GOTERM_BP_FAT	GO:0060183~apelin receptor signaling pathway	2	1.92308	0.0140192	ENSMUSG00000037010, ENSMUSG00000044338	93	3	19596	140.473	1	0.245758	0.237313
GOTERM_BP_FAT	GO:1901698~response to nitrogen compound	13	12.5	0.0146632	ENSMUSG00000030087, ENSMUSG00000059201, ENSMUSG00000042429, ENSMUSG00000020593, ENSMUSG00000000440, ENSMUSG00000023019, ENSMUSG00000024935, ENSMUSG00000066366, ENSMUSG00000039782, ENSMUSG00000053907, ENSMUSG00000045382, ENSMUSG00000030249, ENSMUSG00000051596	93	1260	19596	2.17399	1	0.24808	0.239555
GOTERM_BP_FAT	GO:0051240~positive regulation of multicellular organismal process	18	17.3077	0.0146553	ENSMUSG00000035877, ENSMUSG00000032452, ENSMUSG00000026672, ENSMUSG00000027750, ENSMUSG00000027111, ENSMUSG00000059201, ENSMUSG00000096255, ENSMUSG00000044338, ENSMUSG00000026833, ENSMUSG00000000440, ENSMUSG00000045776, ENSMUSG00000024924, ENSMUSG00000024935, ENSMUSG00000000628, ENSMUSG00000021701, ENSMUSG00000066687, ENSMUSG00000037010, ENSMUSG00000045382	93	2060	19596	1.84115	1	0.24808	0.239555
GOTERM_BP_FAT	GO:0031175~neuron projection development	12	11.5385	0.014399	ENSMUSG00000045776, ENSMUSG00000024924, ENSMUSG00000021701, ENSMUSG00000027750, ENSMUSG00000027111, ENSMUSG00000023915, ENSMUSG00000042834, ENSMUSG00000045382, ENSMUSG00000096255, ENSMUSG00000032911, ENSMUSG00000026833, ENSMUSG00000018217	93	1106	19596	2.28618	1	0.24808	0.239555
GOTERM_BP_FAT	GO:0015800~acidic amino acid transport	3	2.88462	0.0144332	ENSMUSG00000024935, ENSMUSG00000054720, ENSMUSG00000055866	93	39	19596	16.2084	1	0.24808	0.239555
GOTERM_BP_FAT	GO:0010506~regulation of autophagy	6	5.76923	0.0146604	ENSMUSG00000000628, ENSMUSG00000021701, ENSMUSG00000026672, ENSMUSG00000038375, ENSMUSG00000059201, ENSMUSG00000038007	93	306	19596	4.13156	1	0.24808	0.239555
GOTERM_BP_FAT	GO:0005978~glycogen biosynthetic process	3	2.88462	0.0144332	ENSMUSG00000020889, ENSMUSG00000067279, ENSMUSG00000055866	93	39	19596	16.2084	1	0.24808	0.239555
GOTERM_BP_FAT	GO:0010941~regulation of cell death	17	16.3462	0.0150091	ENSMUSG00000056313, ENSMUSG00000026672, ENSMUSG00000028410, ENSMUSG00000027111, ENSMUSG00000059201, ENSMUSG00000096255, ENSMUSG00000042429, ENSMUSG00000026833, ENSMUSG00000000440, ENSMUSG00000024935, ENSMUSG00000021701, ENSMUSG00000064354, ENSMUSG00000066687, ENSMUSG00000045382, ENSMUSG00000038007, ENSMUSG00000063060, ENSMUSG00000018217	93	1900	19596	1.8853	1	0.252465	0.243789
GOTERM_BP_FAT	GO:0072359~circulatory system development	13	12.5	0.0153466	ENSMUSG00000057315, ENSMUSG00000054690, ENSMUSG00000026473, ENSMUSG00000059201, ENSMUSG00000044338, ENSMUSG00000026833, ENSMUSG00000000440, ENSMUSG00000024935, ENSMUSG00000000628, ENSMUSG00000021701, ENSMUSG00000037010, ENSMUSG00000045382, ENSMUSG00000032911	93	1268	19596	2.16027	1	0.256659	0.24784
GOTERM_BP_FAT	GO:0042593~glucose homeostasis	6	5.76923	0.0158182	ENSMUSG00000030087, ENSMUSG00000000628, ENSMUSG00000020889, ENSMUSG00000059201, ENSMUSG00000027533, ENSMUSG00000000440	93	312	19596	4.05211	1	0.262489	0.253469
GOTERM_BP_FAT	GO:0015804~neutral amino acid transport	3	2.88462	0.0158756	ENSMUSG00000024935, ENSMUSG00000059201, ENSMUSG00000010064	93	41	19596	15.4178	1	0.262489	0.253469
GOTERM_BP_FAT	GO:0033500~carbohydrate homeostasis	6	5.76923	0.0160169	ENSMUSG00000030087, ENSMUSG00000000628, ENSMUSG00000020889, ENSMUSG00000059201, ENSMUSG00000027533, ENSMUSG00000000440	93	313	19596	4.03916	1	0.263329	0.25428
GOTERM_BP_FAT	GO:0010557~positive regulation of macromolecule biosynthetic process	17	16.3462	0.0162938	ENSMUSG00000031442, ENSMUSG00000030087, ENSMUSG00000027111, ENSMUSG00000020593, ENSMUSG00000000440, ENSMUSG00000022389, ENSMUSG00000021775, ENSMUSG00000003949, ENSMUSG00000069049, ENSMUSG00000066687, ENSMUSG00000037010, ENSMUSG00000020889, ENSMUSG00000038375, ENSMUSG00000073565, ENSMUSG00000010064, ENSMUSG00000063060, ENSMUSG00000059824	93	1918	19596	1.8676	1	0.266376	0.257223
GOTERM_BP_FAT	GO:0031670~cellular response to nutrient	3	2.88462	0.0166191	ENSMUSG00000027750, ENSMUSG00000059201, ENSMUSG00000000440	93	42	19596	15.0507	1	0.270176	0.260891
GOTERM_BP_FAT	GO:0034645~cellular macromolecule biosynthetic process	35	33.6538	0.0167268	ENSMUSG00000035877, ENSMUSG00000030087, ENSMUSG00000056313, ENSMUSG00000027111, ENSMUSG00000059201, ENSMUSG00000006611, ENSMUSG00000049327, ENSMUSG00000022389, ENSMUSG00000064339, ENSMUSG00000064372, ENSMUSG00000069049, ENSMUSG00000021775, ENSMUSG00000003949, ENSMUSG00000037010, ENSMUSG00000020889, ENSMUSG00000038007, ENSMUSG00000055866, ENSMUSG00000063060, ENSMUSG00000059824, ENSMUSG00000031442,…	93	5174	19596	1.42537	1	0.270416	0.261124
GOTERM_BP_FAT	GO:0019751~polyol metabolic process	4	3.84615	0.0169423	ENSMUSG00000059201, ENSMUSG00000030747, ENSMUSG00000038007, ENSMUSG00000042249	93	115	19596	7.32903	1	0.272387	0.263027
GOTERM_BP_FAT	GO:0031344~regulation of cell projection organization	10	9.61538	0.0171781	ENSMUSG00000024924, ENSMUSG00000057315, ENSMUSG00000021701, ENSMUSG00000027111, ENSMUSG00000045382, ENSMUSG00000096255, ENSMUSG00000032911, ENSMUSG00000026833, ENSMUSG00000018217, ENSMUSG00000039735	93	841	19596	2.50547	1	0.274661	0.265222
GOTERM_BP_FAT	GO:1903530~regulation of secretion by cell	9	8.65385	0.0178831	ENSMUSG00000037010, ENSMUSG00000026473, ENSMUSG00000020889, ENSMUSG00000059201, ENSMUSG00000042429, ENSMUSG00000049303, ENSMUSG00000006611, ENSMUSG00000055866, ENSMUSG00000000440	93	706	19596	2.6861	1	0.277722	0.268178
GOTERM_BP_FAT	GO:0015758~glucose transport	4	3.84615	0.0177311	ENSMUSG00000030087, ENSMUSG00000000628, ENSMUSG00000059201, ENSMUSG00000027533	93	117	19596	7.20375	1	0.277722	0.268178
GOTERM_BP_FAT	GO:0009968~negative regulation of signal transduction	13	12.5	0.0179324	ENSMUSG00000057315, ENSMUSG00000056313, ENSMUSG00000026672, ENSMUSG00000028410, ENSMUSG00000027111, ENSMUSG00000096255, ENSMUSG00000044338, ENSMUSG00000042249, ENSMUSG00000000440, ENSMUSG00000026678, ENSMUSG00000037010, ENSMUSG00000020889, ENSMUSG00000051596	93	1296	19596	2.1136	1	0.277722	0.268178
GOTERM_BP_FAT	GO:0008645~hexose transport	4	3.84615	0.018133	ENSMUSG00000030087, ENSMUSG00000000628, ENSMUSG00000059201, ENSMUSG00000027533	93	118	19596	7.1427	1	0.277722	0.268178
GOTERM_BP_FAT	GO:0006914~autophagy	7	6.73077	0.017486	ENSMUSG00000000628, ENSMUSG00000021701, ENSMUSG00000026672, ENSMUSG00000038375, ENSMUSG00000059201, ENSMUSG00000018217, ENSMUSG00000039735	93	440	19596	3.3522	1	0.277722	0.268178
GOTERM_BP_FAT	GO:0006109~regulation of carbohydrate metabolic process	5	4.80769	0.0180389	ENSMUSG00000023019, ENSMUSG00000067279, ENSMUSG00000059201, ENSMUSG00000030747, ENSMUSG00000049999	93	213	19596	4.94624	1	0.277722	0.268178
GOTERM_BP_FAT	GO:0005976~polysaccharide metabolic process	4	3.84615	0.0177311	ENSMUSG00000020889, ENSMUSG00000067279, ENSMUSG00000055866, ENSMUSG00000049999	93	117	19596	7.20375	1	0.277722	0.268178
GOTERM_BP_FAT	GO:0000122~negative regulation of transcription from RNA polymerase II promoter	11	10.5769	0.0180649	ENSMUSG00000021775, ENSMUSG00000035877, ENSMUSG00000066687, ENSMUSG00000020889, ENSMUSG00000059201, ENSMUSG00000003038, ENSMUSG00000020593, ENSMUSG00000028957, ENSMUSG00000049327, ENSMUSG00000055866, ENSMUSG00000000440	93	994	19596	2.3318	1	0.277722	0.268178
GOTERM_BP_FAT	GO:0022008~neurogenesis	17	16.3462	0.0183806	ENSMUSG00000030087, ENSMUSG00000027750, ENSMUSG00000027111, ENSMUSG00000059201, ENSMUSG00000042834, ENSMUSG00000096255, ENSMUSG00000026833, ENSMUSG00000000440, ENSMUSG00000045776, ENSMUSG00000024924, ENSMUSG00000024935, ENSMUSG00000021701, ENSMUSG00000023915, ENSMUSG00000045382, ENSMUSG00000032911, ENSMUSG00000055866, ENSMUSG00000018217	93	1945	19596	1.84168	1	0.280039	0.270416
GOTERM_BP_FAT	GO:0046890~regulation of lipid biosynthetic process	5	4.80769	0.0186001	ENSMUSG00000020889, ENSMUSG00000059201, ENSMUSG00000027533, ENSMUSG00000030747, ENSMUSG00000020593	93	215	19596	4.90023	1	0.281907	0.27222
GOTERM_BP_FAT	GO:0051186~cofactor metabolic process	7	6.73077	0.0187435	ENSMUSG00000023019, ENSMUSG00000032279, ENSMUSG00000000628, ENSMUSG00000053907, ENSMUSG00000018846, ENSMUSG00000030747, ENSMUSG00000030246	93	447	19596	3.2997	1	0.282609	0.272897
GOTERM_BP_FAT	GO:0015749~monosaccharide transport	4	3.84615	0.0189522	ENSMUSG00000030087, ENSMUSG00000000628, ENSMUSG00000059201, ENSMUSG00000027533	93	120	19596	7.02366	1	0.284283	0.274514
GOTERM_BP_FAT	GO:0043255~regulation of carbohydrate biosynthetic process	4	3.84615	0.0193694	ENSMUSG00000067279, ENSMUSG00000059201, ENSMUSG00000030747, ENSMUSG00000049999	93	121	19596	6.96561	1	0.28905	0.279117
GOTERM_BP_FAT	GO:2000112~regulation of cellular macromolecule biosynthetic process	30	28.8462	0.0195768	ENSMUSG00000035877, ENSMUSG00000030087, ENSMUSG00000056313, ENSMUSG00000027111, ENSMUSG00000059201, ENSMUSG00000006611, ENSMUSG00000049327, ENSMUSG00000022389, ENSMUSG00000069049, ENSMUSG00000021775, ENSMUSG00000003949, ENSMUSG00000037010, ENSMUSG00000020889, ENSMUSG00000038007, ENSMUSG00000055866, ENSMUSG00000063060, ENSMUSG00000059824, ENSMUSG00000031442, ENSMUSG00000020190, ENSMUSG00000003038,…	93	4277	19596	1.47797	1	0.28918	0.279243
GOTERM_BP_FAT	GO:0048666~neuron development	13	12.5	0.0195513	ENSMUSG00000027750, ENSMUSG00000027111, ENSMUSG00000059201, ENSMUSG00000042834, ENSMUSG00000096255, ENSMUSG00000026833, ENSMUSG00000045776, ENSMUSG00000024924, ENSMUSG00000021701, ENSMUSG00000023915, ENSMUSG00000045382, ENSMUSG00000032911, ENSMUSG00000018217	93	1312	19596	2.08782	1	0.28918	0.279243
GOTERM_BP_FAT	GO:1903508~positive regulation of nucleic acid-templated transcription	15	14.4231	0.0202854	ENSMUSG00000031442, ENSMUSG00000030087, ENSMUSG00000027111, ENSMUSG00000020593, ENSMUSG00000000440, ENSMUSG00000022389, ENSMUSG00000021775, ENSMUSG00000003949, ENSMUSG00000066687, ENSMUSG00000037010, ENSMUSG00000020889, ENSMUSG00000038375, ENSMUSG00000010064, ENSMUSG00000063060, ENSMUSG00000059824	93	1638	19596	1.92958	1	0.293685	0.283593
GOTERM_BP_FAT	GO:0045893~positive regulation of transcription, DNA-templated	15	14.4231	0.0202854	ENSMUSG00000031442, ENSMUSG00000030087, ENSMUSG00000027111, ENSMUSG00000020593, ENSMUSG00000000440, ENSMUSG00000022389, ENSMUSG00000021775, ENSMUSG00000003949, ENSMUSG00000066687, ENSMUSG00000037010, ENSMUSG00000020889, ENSMUSG00000038375, ENSMUSG00000010064, ENSMUSG00000063060, ENSMUSG00000059824	93	1638	19596	1.92958	1	0.293685	0.283593
GOTERM_BP_FAT	GO:0031644~regulation of neurological system process	4	3.84615	0.0202189	ENSMUSG00000023915, ENSMUSG00000027533, ENSMUSG00000042429, ENSMUSG00000020593	93	123	19596	6.85235	1	0.293685	0.283593
GOTERM_BP_FAT	GO:0030522~intracellular receptor signaling pathway	5	4.80769	0.0200503	ENSMUSG00000028410, ENSMUSG00000056673, ENSMUSG00000059201, ENSMUSG00000027533, ENSMUSG00000000440	93	220	19596	4.78886	1	0.293685	0.283593
GOTERM_BP_FAT	GO:1903523~negative regulation of blood circulation	3	2.88462	0.0205527	ENSMUSG00000037010, ENSMUSG00000059201, ENSMUSG00000042429	93	47	19596	13.4496	1	0.29608	0.285906
GOTERM_BP_FAT	GO:1902680~positive regulation of RNA biosynthetic process	15	14.4231	0.0211631	ENSMUSG00000031442, ENSMUSG00000030087, ENSMUSG00000027111, ENSMUSG00000020593, ENSMUSG00000000440, ENSMUSG00000022389, ENSMUSG00000021775, ENSMUSG00000003949, ENSMUSG00000066687, ENSMUSG00000037010, ENSMUSG00000020889, ENSMUSG00000038375, ENSMUSG00000010064, ENSMUSG00000063060, ENSMUSG00000059824	93	1647	19596	1.91903	1	0.301886	0.291512
GOTERM_BP_FAT	GO:0008283~cell proliferation	18	17.3077	0.0211468	ENSMUSG00000026672, ENSMUSG00000026473, ENSMUSG00000059201, ENSMUSG00000042429, ENSMUSG00000044338, ENSMUSG00000000440, ENSMUSG00000026678, ENSMUSG00000096768, ENSMUSG00000066687, ENSMUSG00000037010, ENSMUSG00000020889, ENSMUSG00000023915, ENSMUSG00000045382, ENSMUSG00000032911, ENSMUSG00000038007, ENSMUSG00000055866, ENSMUSG00000063060, ENSMUSG00000018217	93	2146	19596	1.76737	1	0.301886	0.291512
GOTERM_BP_FAT	GO:0045860~positive regulation of protein kinase activity	7	6.73077	0.0214421	ENSMUSG00000024924, ENSMUSG00000024935, ENSMUSG00000056313, ENSMUSG00000059201, ENSMUSG00000042429, ENSMUSG00000032911, ENSMUSG00000002058	93	461	19596	3.1995	1	0.304374	0.293914
GOTERM_BP_FAT	GO:0015833~peptide transport	16	15.3846	0.0216336	ENSMUSG00000026672, ENSMUSG00000028410, ENSMUSG00000026473, ENSMUSG00000059201, ENSMUSG00000096255, ENSMUSG00000042429, ENSMUSG00000006611, ENSMUSG00000042249, ENSMUSG00000000440, ENSMUSG00000002058, ENSMUSG00000024924, ENSMUSG00000024935, ENSMUSG00000037010, ENSMUSG00000020889, ENSMUSG00000067279, ENSMUSG00000055866	93	1816	19596	1.85647	1	0.305601	0.295099
GOTERM_BP_FAT	GO:0060047~heart contraction	5	4.80769	0.0221951	ENSMUSG00000024935, ENSMUSG00000037010, ENSMUSG00000045382, ENSMUSG00000030249, ENSMUSG00000042429	93	227	19596	4.64118	1	0.310518	0.299847
GOTERM_BP_FAT	GO:0032869~cellular response to insulin stimulus	5	4.80769	0.0221951	ENSMUSG00000039782, ENSMUSG00000059201, ENSMUSG00000051596, ENSMUSG00000020593, ENSMUSG00000000440	93	227	19596	4.64118	1	0.310518	0.299847
GOTERM_BP_FAT	GO:1901617~organic hydroxy compound biosynthetic process	5	4.80769	0.0225125	ENSMUSG00000020889, ENSMUSG00000059201, ENSMUSG00000038007, ENSMUSG00000055866, ENSMUSG00000030246	93	228	19596	4.62083	1	0.311959	0.301239
GOTERM_BP_FAT	GO:0008277~regulation of G-protein coupled receptor protein signaling pathway	4	3.84615	0.0224317	ENSMUSG00000037010, ENSMUSG00000096255, ENSMUSG00000044338, ENSMUSG00000042249	93	128	19596	6.58468	1	0.311959	0.301239
GOTERM_BP_FAT	GO:0043434~response to peptide hormone	7	6.73077	0.0226756	ENSMUSG00000030087, ENSMUSG00000066366, ENSMUSG00000039782, ENSMUSG00000059201, ENSMUSG00000051596, ENSMUSG00000020593, ENSMUSG00000000440	93	467	19596	3.15839	1	0.31273	0.301983
GOTERM_BP_FAT	GO:0045935~positive regulation of nucleobase-containing compound metabolic process	17	16.3462	0.0232699	ENSMUSG00000031442, ENSMUSG00000030087, ENSMUSG00000027111, ENSMUSG00000020593, ENSMUSG00000000440, ENSMUSG00000022389, ENSMUSG00000021775, ENSMUSG00000003949, ENSMUSG00000023019, ENSMUSG00000064354, ENSMUSG00000066687, ENSMUSG00000037010, ENSMUSG00000020889, ENSMUSG00000038375, ENSMUSG00000010064, ENSMUSG00000063060, ENSMUSG00000059824	93	2000	19596	1.79103	1	0.313192	0.30243
GOTERM_BP_FAT	GO:0034097~response to cytokine	12	11.5385	0.0230539	ENSMUSG00000023019, ENSMUSG00000024935, ENSMUSG00000000628, ENSMUSG00000027750, ENSMUSG00000020889, ENSMUSG00000066366, ENSMUSG00000053907, ENSMUSG00000023915, ENSMUSG00000059201, ENSMUSG00000045382, ENSMUSG00000051596, ENSMUSG00000000440	93	1187	19596	2.13017	1	0.313192	0.30243
GOTERM_BP_FAT	GO:0031529~ruffle organization	3	2.88462	0.0230806	ENSMUSG00000057315, ENSMUSG00000020593, ENSMUSG00000032911	93	50	19596	12.6426	1	0.313192	0.30243
GOTERM_BP_FAT	GO:0031401~positive regulation of protein modification process	13	12.5	0.0233549	ENSMUSG00000056313, ENSMUSG00000059201, ENSMUSG00000042429, ENSMUSG00000020593, ENSMUSG00000006611, ENSMUSG00000044338, ENSMUSG00000042249, ENSMUSG00000000440, ENSMUSG00000002058, ENSMUSG00000024924, ENSMUSG00000024935, ENSMUSG00000045382, ENSMUSG00000032911	93	1346	19596	2.03509	1	0.313192	0.30243
GOTERM_BP_FAT	GO:0010556~regulation of macromolecule biosynthetic process	30	28.8462	0.0231923	ENSMUSG00000035877, ENSMUSG00000030087, ENSMUSG00000056313, ENSMUSG00000027111, ENSMUSG00000059201, ENSMUSG00000006611, ENSMUSG00000049327, ENSMUSG00000022389, ENSMUSG00000069049, ENSMUSG00000021775, ENSMUSG00000003949, ENSMUSG00000037010, ENSMUSG00000020889, ENSMUSG00000038007, ENSMUSG00000055866, ENSMUSG00000063060, ENSMUSG00000059824, ENSMUSG00000031442, ENSMUSG00000020190, ENSMUSG00000003038,…	93	4334	19596	1.45853	1	0.313192	0.30243
GOTERM_BP_FAT	GO:0006915~apoptotic process	17	16.3462	0.0229799	ENSMUSG00000056313, ENSMUSG00000026672, ENSMUSG00000020190, ENSMUSG00000028410, ENSMUSG00000027111, ENSMUSG00000059201, ENSMUSG00000042429, ENSMUSG00000026833, ENSMUSG00000000440, ENSMUSG00000024935, ENSMUSG00000000628, ENSMUSG00000021701, ENSMUSG00000066687, ENSMUSG00000023915, ENSMUSG00000038007, ENSMUSG00000063060, ENSMUSG00000018217	93	1997	19596	1.79372	1	0.313192	0.30243
GOTERM_BP_FAT	GO:0071900~regulation of protein serine/threonine kinase activity	7	6.73077	0.0237395	ENSMUSG00000056313, ENSMUSG00000028410, ENSMUSG00000029385, ENSMUSG00000042429, ENSMUSG00000032911, ENSMUSG00000000440, ENSMUSG00000018217	93	472	19596	3.12493	1	0.315086	0.304259
GOTERM_BP_FAT	GO:0014070~response to organic cyclic compound	12	11.5385	0.023821	ENSMUSG00000023019, ENSMUSG00000024935, ENSMUSG00000027750, ENSMUSG00000028410, ENSMUSG00000027111, ENSMUSG00000056673, ENSMUSG00000053907, ENSMUSG00000059201, ENSMUSG00000045382, ENSMUSG00000030249, ENSMUSG00000042429, ENSMUSG00000000440	93	1193	19596	2.11946	1	0.315086	0.304259
GOTERM_BP_FAT	GO:0010817~regulation of hormone levels	8	7.69231	0.0237098	ENSMUSG00000037010, ENSMUSG00000026473, ENSMUSG00000020889, ENSMUSG00000059201, ENSMUSG00000042429, ENSMUSG00000006611, ENSMUSG00000055866, ENSMUSG00000000440	93	605	19596	2.78624	1	0.315086	0.304259
GOTERM_BP_FAT	GO:0051641~cellular localization	22	21.1538	0.024174	ENSMUSG00000026672, ENSMUSG00000028410, ENSMUSG00000026473, ENSMUSG00000059201, ENSMUSG00000096255, ENSMUSG00000042429, ENSMUSG00000049303, ENSMUSG00000006611, ENSMUSG00000044338, ENSMUSG00000042249, ENSMUSG00000000440, ENSMUSG00000024935, ENSMUSG00000000628, ENSMUSG00000100862, ENSMUSG00000066687, ENSMUSG00000020889, ENSMUSG00000067279, ENSMUSG00000038375, ENSMUSG00000039956, ENSMUSG00000055866,…	93	2878	19596	1.61071	1	0.31831	0.307371
GOTERM_BP_FAT	GO:0050806~positive regulation of synaptic transmission	6	5.76923	0.0243207	ENSMUSG00000024935, ENSMUSG00000032452, ENSMUSG00000021701, ENSMUSG00000026473, ENSMUSG00000042429, ENSMUSG00000049303	93	349	19596	3.62252	1	0.318798	0.307843
GOTERM_BP_FAT	GO:0048259~regulation of receptor-mediated endocytosis	4	3.84615	0.0247716	ENSMUSG00000037010, ENSMUSG00000006611, ENSMUSG00000000440, ENSMUSG00000002058	93	133	19596	6.33713	1	0.32038	0.30937
GOTERM_BP_FAT	GO:0043280~positive regulation of cysteine-type endopeptidase activity involved in apoptotic process	4	3.84615	0.0247716	ENSMUSG00000024935, ENSMUSG00000038007, ENSMUSG00000000440, ENSMUSG00000063060	93	133	19596	6.33713	1	0.32038	0.30937
GOTERM_BP_FAT	GO:0006357~regulation of transcription from RNA polymerase II promoter	21	20.1923	0.0247263	ENSMUSG00000031442, ENSMUSG00000035877, ENSMUSG00000030087, ENSMUSG00000027111, ENSMUSG00000059201, ENSMUSG00000003038, ENSMUSG00000020593, ENSMUSG00000028957, ENSMUSG00000006611, ENSMUSG00000049327, ENSMUSG00000000440, ENSMUSG00000022389, ENSMUSG00000021775, ENSMUSG00000003949, ENSMUSG00000066687, ENSMUSG00000037010, ENSMUSG00000020889, ENSMUSG00000010064, ENSMUSG00000055866, ENSMUSG00000063060,…	93	2707	19596	1.63462	1	0.32038	0.30937
GOTERM_BP_FAT	GO:0009117~nucleotide metabolic process	8	7.69231	0.0252413	ENSMUSG00000023019, ENSMUSG00000032279, ENSMUSG00000000628, ENSMUSG00000100862, ENSMUSG00000064354, ENSMUSG00000018846, ENSMUSG00000064358, ENSMUSG00000030246	93	613	19596	2.74988	1	0.323578	0.312458
GOTERM_BP_FAT	GO:0003015~heart process	5	4.80769	0.025152	ENSMUSG00000024935, ENSMUSG00000037010, ENSMUSG00000045382, ENSMUSG00000030249, ENSMUSG00000042429	93	236	19596	4.46419	1	0.323578	0.312458
GOTERM_BP_FAT	GO:0021700~developmental maturation	6	5.76923	0.0256577	ENSMUSG00000030683, ENSMUSG00000066687, ENSMUSG00000059201, ENSMUSG00000032911, ENSMUSG00000000440, ENSMUSG00000018217	93	354	19596	3.57135	1	0.327474	0.31622
GOTERM_BP_FAT	GO:1903827~regulation of cellular protein localization	8	7.69231	0.0262324	ENSMUSG00000024935, ENSMUSG00000028410, ENSMUSG00000026473, ENSMUSG00000038375, ENSMUSG00000059201, ENSMUSG00000006611, ENSMUSG00000039956, ENSMUSG00000000440	93	618	19596	2.72763	1	0.329851	0.318516
GOTERM_BP_FAT	GO:0071345~cellular response to cytokine stimulus	11	10.5769	0.0266374	ENSMUSG00000023019, ENSMUSG00000024935, ENSMUSG00000000628, ENSMUSG00000027750, ENSMUSG00000020889, ENSMUSG00000053907, ENSMUSG00000023915, ENSMUSG00000059201, ENSMUSG00000045382, ENSMUSG00000051596, ENSMUSG00000000440	93	1059	19596	2.18867	1	0.329851	0.318516
GOTERM_BP_FAT	GO:0052548~regulation of endopeptidase activity	6	5.76923	0.0264822	ENSMUSG00000066364, ENSMUSG00000024935, ENSMUSG00000066366, ENSMUSG00000038007, ENSMUSG00000000440, ENSMUSG00000063060	93	357	19596	3.54134	1	0.329851	0.318516
GOTERM_BP_FAT	GO:0051130~positive regulation of cellular component organization	14	13.4615	0.0265791	ENSMUSG00000032452, ENSMUSG00000026672, ENSMUSG00000027111, ENSMUSG00000096255, ENSMUSG00000020593, ENSMUSG00000006611, ENSMUSG00000044338, ENSMUSG00000000440, ENSMUSG00000045776, ENSMUSG00000024924, ENSMUSG00000000628, ENSMUSG00000037010, ENSMUSG00000045382, ENSMUSG00000039735	93	1533	19596	1.92429	1	0.329851	0.318516
GOTERM_BP_FAT	GO:0044093~positive regulation of molecular function	15	14.4231	0.0259925	ENSMUSG00000057315, ENSMUSG00000056313, ENSMUSG00000027111, ENSMUSG00000059201, ENSMUSG00000042429, ENSMUSG00000006611, ENSMUSG00000000440, ENSMUSG00000002058, ENSMUSG00000024924, ENSMUSG00000024935, ENSMUSG00000018169, ENSMUSG00000021701, ENSMUSG00000032911, ENSMUSG00000038007, ENSMUSG00000063060	93	1692	19596	1.86799	1	0.329851	0.318516
GOTERM_BP_FAT	GO:0031099~regeneration	5	4.80769	0.0265391	ENSMUSG00000027750, ENSMUSG00000042834, ENSMUSG00000020593, ENSMUSG00000006611, ENSMUSG00000000440	93	240	19596	4.38978	1	0.329851	0.318516
GOTERM_BP_FAT	GO:0006753~nucleoside phosphate metabolic process	8	7.69231	0.0266362	ENSMUSG00000023019, ENSMUSG00000032279, ENSMUSG00000000628, ENSMUSG00000100862, ENSMUSG00000064354, ENSMUSG00000018846, ENSMUSG00000064358, ENSMUSG00000030246	93	620	19596	2.71883	1	0.329851	0.318516
GOTERM_BP_FAT	GO:0060336~negative regulation of interferon-gamma-mediated signaling pathway	2	1.92308	0.027844	ENSMUSG00000051596, ENSMUSG00000000440	93	6	19596	70.2366	1	0.330718	0.319353
GOTERM_BP_FAT	GO:0060331~negative regulation of response to interferon-gamma	2	1.92308	0.027844	ENSMUSG00000051596, ENSMUSG00000000440	93	6	19596	70.2366	1	0.330718	0.319353
GOTERM_BP_FAT	GO:0050873~brown fat cell differentiation	3	2.88462	0.0275611	ENSMUSG00000027111, ENSMUSG00000039956, ENSMUSG00000000440	93	55	19596	11.4933	1	0.330718	0.319353
GOTERM_BP_FAT	GO:0048713~regulation of oligodendrocyte differentiation	3	2.88462	0.0275611	ENSMUSG00000023915, ENSMUSG00000045382, ENSMUSG00000000440	93	55	19596	11.4933	1	0.330718	0.319353
GOTERM_BP_FAT	GO:0045744~negative regulation of G-protein coupled receptor protein signaling pathway	3	2.88462	0.0275611	ENSMUSG00000037010, ENSMUSG00000044338, ENSMUSG00000042249	93	55	19596	11.4933	1	0.330718	0.319353
GOTERM_BP_FAT	GO:0044070~regulation of anion transport	4	3.84615	0.0277471	ENSMUSG00000059201, ENSMUSG00000042429, ENSMUSG00000010064, ENSMUSG00000055866	93	139	19596	6.06359	1	0.330718	0.319353
GOTERM_BP_FAT	GO:0042127~regulation of cell proliferation	16	15.3846	0.0274262	ENSMUSG00000026672, ENSMUSG00000026473, ENSMUSG00000059201, ENSMUSG00000042429, ENSMUSG00000044338, ENSMUSG00000000440, ENSMUSG00000026678, ENSMUSG00000096768, ENSMUSG00000066687, ENSMUSG00000037010, ENSMUSG00000020889, ENSMUSG00000023915, ENSMUSG00000038007, ENSMUSG00000055866, ENSMUSG00000063060, ENSMUSG00000018217	93	1871	19596	1.8019	1	0.330718	0.319353
GOTERM_BP_FAT	GO:0019249~lactate biosynthetic process	2	1.92308	0.027844	ENSMUSG00000055866, ENSMUSG00000030246	93	6	19596	70.2366	1	0.330718	0.319353
GOTERM_BP_FAT	GO:0010647~positive regulation of cell communication	17	16.3462	0.0275207	ENSMUSG00000031442, ENSMUSG00000056313, ENSMUSG00000032452, ENSMUSG00000026473, ENSMUSG00000059201, ENSMUSG00000027533, ENSMUSG00000096255, ENSMUSG00000042429, ENSMUSG00000049303, ENSMUSG00000006611, ENSMUSG00000000440, ENSMUSG00000024935, ENSMUSG00000018169, ENSMUSG00000021701, ENSMUSG00000037010, ENSMUSG00000045382, ENSMUSG00000032911	93	2041	19596	1.75505	1	0.330718	0.319353
GOTERM_BP_FAT	GO:0002457~T cell antigen processing and presentation	2	1.92308	0.027844	ENSMUSG00000056673, ENSMUSG00000006611	93	6	19596	70.2366	1	0.330718	0.319353
GOTERM_BP_FAT	GO:0019637~organophosphate metabolic process	11	10.5769	0.0281796	ENSMUSG00000023019, ENSMUSG00000032279, ENSMUSG00000000628, ENSMUSG00000100862, ENSMUSG00000064354, ENSMUSG00000018846, ENSMUSG00000064358, ENSMUSG00000027533, ENSMUSG00000020593, ENSMUSG00000042249, ENSMUSG00000030246	93	1069	19596	2.1682	1	0.333344	0.321888
GOTERM_BP_FAT	GO:0042180~cellular ketone metabolic process	5	4.80769	0.0283366	ENSMUSG00000023019, ENSMUSG00000020889, ENSMUSG00000027533, ENSMUSG00000030747, ENSMUSG00000000440	93	245	19596	4.3002	1	0.333413	0.321955
GOTERM_BP_FAT	GO:0023056~positive regulation of signaling	17	16.3462	0.0284146	ENSMUSG00000031442, ENSMUSG00000056313, ENSMUSG00000032452, ENSMUSG00000026473, ENSMUSG00000059201, ENSMUSG00000027533, ENSMUSG00000096255, ENSMUSG00000042429, ENSMUSG00000049303, ENSMUSG00000006611, ENSMUSG00000000440, ENSMUSG00000024935, ENSMUSG00000018169, ENSMUSG00000021701, ENSMUSG00000037010, ENSMUSG00000045382, ENSMUSG00000032911	93	2049	19596	1.7482	1	0.333413	0.321955
GOTERM_BP_FAT	GO:1901653~cellular response to peptide	6	5.76923	0.0293527	ENSMUSG00000030087, ENSMUSG00000039782, ENSMUSG00000059201, ENSMUSG00000051596, ENSMUSG00000020593, ENSMUSG00000000440	93	367	19596	3.44484	1	0.340002	0.328318
GOTERM_BP_FAT	GO:0043067~regulation of programmed cell death	15	14.4231	0.029136	ENSMUSG00000056313, ENSMUSG00000026672, ENSMUSG00000028410, ENSMUSG00000027111, ENSMUSG00000059201, ENSMUSG00000042429, ENSMUSG00000026833, ENSMUSG00000000440, ENSMUSG00000024935, ENSMUSG00000021701, ENSMUSG00000066687, ENSMUSG00000045382, ENSMUSG00000038007, ENSMUSG00000063060, ENSMUSG00000018217	93	1718	19596	1.83972	1	0.340002	0.328318
GOTERM_BP_FAT	GO:0042063~gliogenesis	6	5.76923	0.0293527	ENSMUSG00000030087, ENSMUSG00000023915, ENSMUSG00000045382, ENSMUSG00000032911, ENSMUSG00000000440, ENSMUSG00000018217	93	367	19596	3.44484	1	0.340002	0.328318
GOTERM_BP_FAT	GO:0019674~NAD metabolic process	3	2.88462	0.0294435	ENSMUSG00000023019, ENSMUSG00000032279, ENSMUSG00000030246	93	57	19596	11.09	1	0.340002	0.328318
GOTERM_BP_FAT	GO:0051254~positive regulation of RNA metabolic process	15	14.4231	0.0308101	ENSMUSG00000031442, ENSMUSG00000030087, ENSMUSG00000027111, ENSMUSG00000020593, ENSMUSG00000000440, ENSMUSG00000022389, ENSMUSG00000021775, ENSMUSG00000003949, ENSMUSG00000066687, ENSMUSG00000037010, ENSMUSG00000020889, ENSMUSG00000038375, ENSMUSG00000010064, ENSMUSG00000063060, ENSMUSG00000059824	93	1731	19596	1.82591	1	0.347785	0.335833
GOTERM_BP_FAT	GO:0043269~regulation of ion transport	9	8.65385	0.030954	ENSMUSG00000059201, ENSMUSG00000045382, ENSMUSG00000030249, ENSMUSG00000042429, ENSMUSG00000010064, ENSMUSG00000049303, ENSMUSG00000006611, ENSMUSG00000044338, ENSMUSG00000055866	93	784	19596	2.41886	1	0.347785	0.335833
GOTERM_BP_FAT	GO:0030030~cell projection organization	15	14.4231	0.0306788	ENSMUSG00000057315, ENSMUSG00000027750, ENSMUSG00000027111, ENSMUSG00000042834, ENSMUSG00000096255, ENSMUSG00000020593, ENSMUSG00000026833, ENSMUSG00000045776, ENSMUSG00000024924, ENSMUSG00000021701, ENSMUSG00000023915, ENSMUSG00000045382, ENSMUSG00000032911, ENSMUSG00000018217, ENSMUSG00000039735	93	1730	19596	1.82696	1	0.347785	0.335833
GOTERM_BP_FAT	GO:0010975~regulation of neuron projection development	8	7.69231	0.0309112	ENSMUSG00000024924, ENSMUSG00000021701, ENSMUSG00000027111, ENSMUSG00000045382, ENSMUSG00000096255, ENSMUSG00000032911, ENSMUSG00000026833, ENSMUSG00000018217	93	640	19596	2.63387	1	0.347785	0.335833
GOTERM_BP_FAT	GO:0010906~regulation of glucose metabolic process	4	3.84615	0.0303659	ENSMUSG00000067279, ENSMUSG00000059201, ENSMUSG00000030747, ENSMUSG00000049999	93	144	19596	5.85305	1	0.347785	0.335833
GOTERM_BP_FAT	GO:0006928~movement of cell or subcellular component	18	17.3077	0.0308128	ENSMUSG00000057315, ENSMUSG00000028410, ENSMUSG00000027750, ENSMUSG00000027111, ENSMUSG00000026473, ENSMUSG00000059201, ENSMUSG00000096255, ENSMUSG00000042429, ENSMUSG00000026833, ENSMUSG00000000440, ENSMUSG00000045776, ENSMUSG00000021701, ENSMUSG00000096768, ENSMUSG00000045382, ENSMUSG00000030249, ENSMUSG00000032911, ENSMUSG00000018217, ENSMUSG00000039735	93	2242	19596	1.69169	1	0.347785	0.335833
GOTERM_BP_FAT	GO:0001659~temperature homeostasis	3	2.88462	0.0304035	ENSMUSG00000037010, ENSMUSG00000020889, ENSMUSG00000042429	93	58	19596	10.8988	1	0.347785	0.335833
GOTERM_BP_FAT	GO:0044255~cellular lipid metabolic process	11	10.5769	0.0316254	ENSMUSG00000023019, ENSMUSG00000029059, ENSMUSG00000059201, ENSMUSG00000027533, ENSMUSG00000030747, ENSMUSG00000035376, ENSMUSG00000020593, ENSMUSG00000038007, ENSMUSG00000055866, ENSMUSG00000000440, ENSMUSG00000018217	93	1090	19596	2.12643	1	0.353961	0.341797
GOTERM_BP_FAT	GO:0051241~negative regulation of multicellular organismal process	13	12.5	0.0327312	ENSMUSG00000059201, ENSMUSG00000096255, ENSMUSG00000042429, ENSMUSG00000020593, ENSMUSG00000006611, ENSMUSG00000026833, ENSMUSG00000000440, ENSMUSG00000021701, ENSMUSG00000066687, ENSMUSG00000037010, ENSMUSG00000023915, ENSMUSG00000032911, ENSMUSG00000018217	93	1415	19596	1.93585	1	0.360642	0.348249
GOTERM_BP_FAT	GO:0036211~protein modification process	27	25.9615	0.032842	ENSMUSG00000030087, ENSMUSG00000056313, ENSMUSG00000056673, ENSMUSG00000059201, ENSMUSG00000096255, ENSMUSG00000042429, ENSMUSG00000006611, ENSMUSG00000049327, ENSMUSG00000042249, ENSMUSG00000002058, ENSMUSG00000024924, ENSMUSG00000038007, ENSMUSG00000055866, ENSMUSG00000018217, ENSMUSG00000020190, ENSMUSG00000028410, ENSMUSG00000026473, ENSMUSG00000029385, ENSMUSG00000028557, ENSMUSG00000020593,…	93	3890	19596	1.46251	1	0.360642	0.348249
GOTERM_BP_FAT	GO:0031348~negative regulation of defense response	5	4.80769	0.0325419	ENSMUSG00000021775, ENSMUSG00000020889, ENSMUSG00000042429, ENSMUSG00000051596, ENSMUSG00000000440	93	256	19596	4.11542	1	0.360642	0.348249
GOTERM_BP_FAT	GO:0006868~glutamine transport	2	1.92308	0.0324095	ENSMUSG00000059201, ENSMUSG00000010064	93	7	19596	60.2028	1	0.360642	0.348249
GOTERM_BP_FAT	GO:0006464~cellular protein modification process	27	25.9615	0.032842	ENSMUSG00000030087, ENSMUSG00000056313, ENSMUSG00000056673, ENSMUSG00000059201, ENSMUSG00000096255, ENSMUSG00000042429, ENSMUSG00000006611, ENSMUSG00000049327, ENSMUSG00000042249, ENSMUSG00000002058, ENSMUSG00000024924, ENSMUSG00000038007, ENSMUSG00000055866, ENSMUSG00000018217, ENSMUSG00000020190, ENSMUSG00000028410, ENSMUSG00000026473, ENSMUSG00000029385, ENSMUSG00000028557, ENSMUSG00000020593,…	93	3890	19596	1.46251	1	0.360642	0.348249
GOTERM_BP_FAT	GO:0055086~nucleobase-containing small molecule metabolic process	8	7.69231	0.0339262	ENSMUSG00000023019, ENSMUSG00000032279, ENSMUSG00000000628, ENSMUSG00000100862, ENSMUSG00000064354, ENSMUSG00000018846, ENSMUSG00000064358, ENSMUSG00000030246	93	653	19596	2.58144	1	0.368378	0.355719
GOTERM_BP_FAT	GO:0051046~regulation of secretion	9	8.65385	0.0338562	ENSMUSG00000037010, ENSMUSG00000026473, ENSMUSG00000020889, ENSMUSG00000059201, ENSMUSG00000042429, ENSMUSG00000049303, ENSMUSG00000006611, ENSMUSG00000055866, ENSMUSG00000000440	93	798	19596	2.37642	1	0.368378	0.355719
GOTERM_BP_FAT	GO:0002526~acute inflammatory response	4	3.84615	0.0336748	ENSMUSG00000066366, ENSMUSG00000042429, ENSMUSG00000006611, ENSMUSG00000000440	93	150	19596	5.61892	1	0.368378	0.355719
GOTERM_BP_FAT	GO:0043470~regulation of carbohydrate catabolic process	3	2.88462	0.0343655	ENSMUSG00000023019, ENSMUSG00000067279, ENSMUSG00000049999	93	62	19596	10.1956	1	0.371761	0.358985
GOTERM_BP_FAT	GO:0050728~negative regulation of inflammatory response	4	3.84615	0.0353969	ENSMUSG00000021775, ENSMUSG00000020889, ENSMUSG00000042429, ENSMUSG00000000440	93	153	19596	5.50875	1	0.380093	0.367031
GOTERM_BP_FAT	GO:0010629~negative regulation of gene expression	17	16.3462	0.0352976	ENSMUSG00000035877, ENSMUSG00000059201, ENSMUSG00000003038, ENSMUSG00000020593, ENSMUSG00000028957, ENSMUSG00000044338, ENSMUSG00000026833, ENSMUSG00000049327, ENSMUSG00000000440, ENSMUSG00000021775, ENSMUSG00000066687, ENSMUSG00000037010, ENSMUSG00000020889, ENSMUSG00000039782, ENSMUSG00000055866, ENSMUSG00000063060, ENSMUSG00000018217	93	2105	19596	1.70169	1	0.380093	0.367031
GOTERM_BP_FAT	GO:0050808~synapse organization	6	5.76923	0.0356679	ENSMUSG00000030683, ENSMUSG00000045776, ENSMUSG00000024935, ENSMUSG00000032452, ENSMUSG00000002341, ENSMUSG00000018217	93	387	19596	3.26682	1	0.380522	0.367445
GOTERM_BP_FAT	GO:0012501~programmed cell death	17	16.3462	0.0356984	ENSMUSG00000056313, ENSMUSG00000026672, ENSMUSG00000020190, ENSMUSG00000028410, ENSMUSG00000027111, ENSMUSG00000059201, ENSMUSG00000042429, ENSMUSG00000026833, ENSMUSG00000000440, ENSMUSG00000024935, ENSMUSG00000000628, ENSMUSG00000021701, ENSMUSG00000066687, ENSMUSG00000023915, ENSMUSG00000038007, ENSMUSG00000063060, ENSMUSG00000018217	93	2108	19596	1.69927	1	0.380522	0.367445
GOTERM_BP_FAT	GO:0016052~carbohydrate catabolic process	4	3.84615	0.0359809	ENSMUSG00000023019, ENSMUSG00000000628, ENSMUSG00000067279, ENSMUSG00000049999	93	154	19596	5.47298	1	0.382133	0.369002
GOTERM_BP_FAT	GO:0008610~lipid biosynthetic process	8	7.69231	0.0361253	ENSMUSG00000029059, ENSMUSG00000020889, ENSMUSG00000059201, ENSMUSG00000027533, ENSMUSG00000030747, ENSMUSG00000035376, ENSMUSG00000020593, ENSMUSG00000038007	93	662	19596	2.54634	1	0.382272	0.369135
GOTERM_BP_FAT	GO:0060612~adipose tissue development	3	2.88462	0.0364179	ENSMUSG00000059201, ENSMUSG00000030747, ENSMUSG00000000440	93	64	19596	9.87702	1	0.383972	0.370777
GOTERM_BP_FAT	GO:2001056~positive regulation of cysteine-type endopeptidase activity	4	3.84615	0.0365699	ENSMUSG00000024935, ENSMUSG00000038007, ENSMUSG00000000440, ENSMUSG00000063060	93	155	19596	5.43767	1	0.384182	0.37098
GOTERM_BP_FAT	GO:1903979~negative regulation of microglial cell activation	2	1.92308	0.0369538	ENSMUSG00000020889, ENSMUSG00000000440	93	8	19596	52.6774	1	0.385432	0.372187
GOTERM_BP_FAT	GO:0035795~negative regulation of mitochondrial membrane permeability	2	1.92308	0.0369538	ENSMUSG00000000628, ENSMUSG00000096255	93	8	19596	52.6774	1	0.385432	0.372187
GOTERM_BP_FAT	GO:1904705~regulation of vascular smooth muscle cell proliferation	3	2.88462	0.0374615	ENSMUSG00000037010, ENSMUSG00000000440, ENSMUSG00000026678	93	65	19596	9.72506	1	0.389332	0.375953
GOTERM_BP_FAT	GO:0045664~regulation of neuron differentiation	9	8.65385	0.0378548	ENSMUSG00000024924, ENSMUSG00000021701, ENSMUSG00000027111, ENSMUSG00000042834, ENSMUSG00000045382, ENSMUSG00000096255, ENSMUSG00000032911, ENSMUSG00000026833, ENSMUSG00000018217	93	816	19596	2.324	1	0.390629	0.377206
GOTERM_BP_FAT	GO:0008643~carbohydrate transport	4	3.84615	0.0377628	ENSMUSG00000030087, ENSMUSG00000000628, ENSMUSG00000059201, ENSMUSG00000027533	93	157	19596	5.3684	1	0.390629	0.377206
GOTERM_BP_FAT	GO:0010565~regulation of cellular ketone metabolic process	4	3.84615	0.0383667	ENSMUSG00000020889, ENSMUSG00000027533, ENSMUSG00000030747, ENSMUSG00000000440	93	158	19596	5.33442	1	0.394513	0.380955
GOTERM_BP_FAT	GO:2000273~positive regulation of receptor activity	3	2.88462	0.0385165	ENSMUSG00000042429, ENSMUSG00000006611, ENSMUSG00000000440	93	66	19596	9.57771	1	0.394659	0.381097
GOTERM_BP_FAT	GO:1903828~negative regulation of cellular protein localization	4	3.84615	0.0395892	ENSMUSG00000028410, ENSMUSG00000038375, ENSMUSG00000039956, ENSMUSG00000000440	93	160	19596	5.26774	1	0.398635	0.384936
GOTERM_BP_FAT	GO:0045776~negative regulation of blood pressure	3	2.88462	0.0395829	ENSMUSG00000037010, ENSMUSG00000030249, ENSMUSG00000042429	93	67	19596	9.43476	1	0.398635	0.384936
GOTERM_BP_FAT	GO:0043085~positive regulation of catalytic activity	12	11.5385	0.0397192	ENSMUSG00000024924, ENSMUSG00000024935, ENSMUSG00000057315, ENSMUSG00000056313, ENSMUSG00000027111, ENSMUSG00000059201, ENSMUSG00000042429, ENSMUSG00000032911, ENSMUSG00000038007, ENSMUSG00000000440, ENSMUSG00000063060, ENSMUSG00000002058	93	1294	19596	1.95403	1	0.398635	0.384936
GOTERM_BP_FAT	GO:0033674~positive regulation of kinase activity	7	6.73077	0.0391977	ENSMUSG00000024924, ENSMUSG00000024935, ENSMUSG00000056313, ENSMUSG00000059201, ENSMUSG00000042429, ENSMUSG00000032911, ENSMUSG00000002058	93	532	19596	2.7725	1	0.398635	0.384936
GOTERM_BP_FAT	GO:0014013~regulation of gliogenesis	4	3.84615	0.0395892	ENSMUSG00000023915, ENSMUSG00000045382, ENSMUSG00000000440, ENSMUSG00000018217	93	160	19596	5.26774	1	0.398635	0.384936
GOTERM_BP_FAT	GO:0010001~glial cell differentiation	5	4.80769	0.0397265	ENSMUSG00000030087, ENSMUSG00000023915, ENSMUSG00000045382, ENSMUSG00000000440, ENSMUSG00000018217	93	273	19596	3.85915	1	0.398635	0.384936
GOTERM_BP_FAT	GO:1990874~vascular smooth muscle cell proliferation	3	2.88462	0.0406603	ENSMUSG00000037010, ENSMUSG00000000440, ENSMUSG00000026678	93	68	19596	9.29602	1	0.400178	0.386426
GOTERM_BP_FAT	GO:0061564~axon development	7	6.73077	0.0416509	ENSMUSG00000045776, ENSMUSG00000023915, ENSMUSG00000042834, ENSMUSG00000045382, ENSMUSG00000096255, ENSMUSG00000026833, ENSMUSG00000018217	93	540	19596	2.73142	1	0.400178	0.386426
GOTERM_BP_FAT	GO:0050727~regulation of inflammatory response	6	5.76923	0.0416514	ENSMUSG00000021775, ENSMUSG00000020889, ENSMUSG00000059201, ENSMUSG00000042429, ENSMUSG00000000440, ENSMUSG00000018217	93	404	19596	3.12935	1	0.400178	0.386426
GOTERM_BP_FAT	GO:0046903~secretion	11	10.5769	0.0410171	ENSMUSG00000000628, ENSMUSG00000064354, ENSMUSG00000037010, ENSMUSG00000026473, ENSMUSG00000020889, ENSMUSG00000059201, ENSMUSG00000042429, ENSMUSG00000049303, ENSMUSG00000006611, ENSMUSG00000055866, ENSMUSG00000000440	93	1140	19596	2.03316	1	0.400178	0.386426
GOTERM_BP_FAT	GO:0046496~nicotinamide nucleotide metabolic process	4	3.84615	0.04146	ENSMUSG00000023019, ENSMUSG00000032279, ENSMUSG00000000628, ENSMUSG00000030246	93	163	19596	5.17079	1	0.400178	0.386426
GOTERM_BP_FAT	GO:0046034~ATP metabolic process	5	4.80769	0.0401752	ENSMUSG00000023019, ENSMUSG00000000628, ENSMUSG00000100862, ENSMUSG00000064354, ENSMUSG00000064358	93	274	19596	3.84507	1	0.400178	0.386426
GOTERM_BP_FAT	GO:0044802~single-organism membrane organization	9	8.65385	0.041668	ENSMUSG00000059811, ENSMUSG00000000628, ENSMUSG00000026672, ENSMUSG00000045382, ENSMUSG00000096255, ENSMUSG00000039956, ENSMUSG00000038217, ENSMUSG00000018217, ENSMUSG00000039735	93	832	19596	2.27931	1	0.400178	0.386426
GOTERM_BP_FAT	GO:0042552~myelination	4	3.84615	0.0402079	ENSMUSG00000023915, ENSMUSG00000045382, ENSMUSG00000020593, ENSMUSG00000018217	93	161	19596	5.23502	1	0.400178	0.386426
GOTERM_BP_FAT	GO:0034214~protein hexamerization	2	1.92308	0.041477	ENSMUSG00000053907, ENSMUSG00000054720	93	9	19596	46.8244	1	0.400178	0.386426
GOTERM_BP_FAT	GO:0030155~regulation of cell adhesion	9	8.65385	0.0411778	ENSMUSG00000027750, ENSMUSG00000066687, ENSMUSG00000054690, ENSMUSG00000027111, ENSMUSG00000023915, ENSMUSG00000059201, ENSMUSG00000045382, ENSMUSG00000006611, ENSMUSG00000038007	93	830	19596	2.2848	1	0.400178	0.386426
GOTERM_BP_FAT	GO:0019362~pyridine nucleotide metabolic process	4	3.84615	0.04146	ENSMUSG00000023019, ENSMUSG00000032279, ENSMUSG00000000628, ENSMUSG00000030246	93	163	19596	5.17079	1	0.400178	0.386426
GOTERM_BP_FAT	GO:0010721~negative regulation of cell development	6	5.76923	0.0405538	ENSMUSG00000021701, ENSMUSG00000027750, ENSMUSG00000096255, ENSMUSG00000032911, ENSMUSG00000026833, ENSMUSG00000018217	93	401	19596	3.15276	1	0.400178	0.386426
GOTERM_BP_FAT	GO:0005981~regulation of glycogen catabolic process	2	1.92308	0.041477	ENSMUSG00000067279, ENSMUSG00000049999	93	9	19596	46.8244	1	0.400178	0.386426
GOTERM_BP_FAT	GO:0008366~axon ensheathment	4	3.84615	0.0420933	ENSMUSG00000023915, ENSMUSG00000045382, ENSMUSG00000020593, ENSMUSG00000018217	93	164	19596	5.13926	1	0.401612	0.387811
GOTERM_BP_FAT	GO:0007272~ensheathment of neurons	4	3.84615	0.0420933	ENSMUSG00000023915, ENSMUSG00000045382, ENSMUSG00000020593, ENSMUSG00000018217	93	164	19596	5.13926	1	0.401612	0.387811
GOTERM_BP_FAT	GO:0048699~generation of neurons	15	14.4231	0.0425488	ENSMUSG00000027750, ENSMUSG00000027111, ENSMUSG00000059201, ENSMUSG00000042834, ENSMUSG00000096255, ENSMUSG00000026833, ENSMUSG00000000440, ENSMUSG00000045776, ENSMUSG00000024924, ENSMUSG00000021701, ENSMUSG00000023915, ENSMUSG00000045382, ENSMUSG00000032911, ENSMUSG00000055866, ENSMUSG00000018217	93	1810	19596	1.74621	1	0.403523	0.389656
GOTERM_BP_FAT	GO:0048662~negative regulation of smooth muscle cell proliferation	3	2.88462	0.0428483	ENSMUSG00000037010, ENSMUSG00000000440, ENSMUSG00000026678	93	70	19596	9.03041	1	0.403523	0.389656
GOTERM_BP_FAT	GO:0015807~L-amino acid transport	3	2.88462	0.0428483	ENSMUSG00000024935, ENSMUSG00000010064, ENSMUSG00000055866	93	70	19596	9.03041	1	0.403523	0.389656
GOTERM_BP_FAT	GO:0010508~positive regulation of autophagy	4	3.84615	0.0427316	ENSMUSG00000000628, ENSMUSG00000021701, ENSMUSG00000026672, ENSMUSG00000038375	93	165	19596	5.10811	1	0.403523	0.389656
GOTERM_BP_FAT	GO:1901652~response to peptide	7	6.73077	0.0432327	ENSMUSG00000030087, ENSMUSG00000066366, ENSMUSG00000039782, ENSMUSG00000059201, ENSMUSG00000051596, ENSMUSG00000020593, ENSMUSG00000000440	93	545	19596	2.70636	1	0.405829	0.391883
GOTERM_BP_FAT	GO:0045944~positive regulation of transcription from RNA polymerase II promoter	12	11.5385	0.0433888	ENSMUSG00000021775, ENSMUSG00000031442, ENSMUSG00000003949, ENSMUSG00000030087, ENSMUSG00000037010, ENSMUSG00000027111, ENSMUSG00000020889, ENSMUSG00000010064, ENSMUSG00000020593, ENSMUSG00000059824, ENSMUSG00000000440, ENSMUSG00000022389	93	1313	19596	1.92575	1	0.405985	0.392034
GOTERM_BP_FAT	GO:0046324~regulation of glucose import	3	2.88462	0.0450794	ENSMUSG00000030087, ENSMUSG00000000628, ENSMUSG00000059201	93	72	19596	8.77957	1	0.417774	0.403418
GOTERM_BP_FAT	GO:0035904~aorta development	3	2.88462	0.0450794	ENSMUSG00000059201, ENSMUSG00000045382, ENSMUSG00000044338	93	72	19596	8.77957	1	0.417774	0.403418
GOTERM_BP_FAT	GO:0032922~circadian regulation of gene expression	3	2.88462	0.0450794	ENSMUSG00000020889, ENSMUSG00000028957, ENSMUSG00000055866	93	72	19596	8.77957	1	0.417774	0.403418
GOTERM_BP_FAT	GO:1905709~negative regulation of membrane permeability	2	1.92308	0.0459791	ENSMUSG00000000628, ENSMUSG00000096255	93	10	19596	42.1419	1	0.418921	0.404525
GOTERM_BP_FAT	GO:0097755~positive regulation of blood vessel diameter	3	2.88462	0.0462109	ENSMUSG00000037010, ENSMUSG00000059201, ENSMUSG00000042429	93	73	19596	8.6593	1	0.418921	0.404525
GOTERM_BP_FAT	GO:0071417~cellular response to organonitrogen compound	8	7.69231	0.0461571	ENSMUSG00000023019, ENSMUSG00000024935, ENSMUSG00000030087, ENSMUSG00000039782, ENSMUSG00000059201, ENSMUSG00000051596, ENSMUSG00000020593, ENSMUSG00000000440	93	699	19596	2.41156	1	0.418921	0.404525
GOTERM_BP_FAT	GO:0050678~regulation of epithelial cell proliferation	6	5.76923	0.0458296	ENSMUSG00000037010, ENSMUSG00000026473, ENSMUSG00000020889, ENSMUSG00000059201, ENSMUSG00000044338, ENSMUSG00000000440	93	415	19596	3.0464	1	0.418921	0.404525
GOTERM_BP_FAT	GO:0035360~positive regulation of peroxisome proliferator activated receptor signaling pathway	2	1.92308	0.0459791	ENSMUSG00000059201, ENSMUSG00000027533	93	10	19596	42.1419	1	0.418921	0.404525
GOTERM_BP_FAT	GO:0010950~positive regulation of endopeptidase activity	4	3.84615	0.0459958	ENSMUSG00000024935, ENSMUSG00000038007, ENSMUSG00000000440, ENSMUSG00000063060	93	170	19596	4.95787	1	0.418921	0.404525
GOTERM_BP_FAT	GO:0001936~regulation of endothelial cell proliferation	4	3.84615	0.0459958	ENSMUSG00000037010, ENSMUSG00000059201, ENSMUSG00000044338, ENSMUSG00000000440	93	170	19596	4.95787	1	0.418921	0.404525
GOTERM_BP_FAT	GO:0002683~negative regulation of immune system process	7	6.73077	0.046509	ENSMUSG00000066687, ENSMUSG00000020889, ENSMUSG00000023915, ENSMUSG00000042429, ENSMUSG00000051596, ENSMUSG00000006611, ENSMUSG00000000440	93	555	19596	2.6576	1	0.420314	0.405871
GOTERM_BP_FAT	GO:0098657~import into cell	4	3.84615	0.0466631	ENSMUSG00000024935, ENSMUSG00000030249, ENSMUSG00000006611, ENSMUSG00000055866	93	171	19596	4.92888	1	0.420401	0.405954
GOTERM_BP_FAT	GO:0034248~regulation of cellular amide metabolic process	7	6.73077	0.046845	ENSMUSG00000069049, ENSMUSG00000020190, ENSMUSG00000039782, ENSMUSG00000073565, ENSMUSG00000026833, ENSMUSG00000055866, ENSMUSG00000000440	93	556	19596	2.65282	1	0.420737	0.406279
GOTERM_BP_FAT	GO:0072524~pyridine-containing compound metabolic process	4	3.84615	0.0473352	ENSMUSG00000023019, ENSMUSG00000032279, ENSMUSG00000000628, ENSMUSG00000030246	93	172	19596	4.90023	1	0.422532	0.408012
GOTERM_BP_FAT	GO:0046887~positive regulation of hormone secretion	4	3.84615	0.0473352	ENSMUSG00000037010, ENSMUSG00000026473, ENSMUSG00000059201, ENSMUSG00000006611	93	172	19596	4.90023	1	0.422532	0.408012
GOTERM_BP_FAT	GO:0032880~regulation of protein localization	10	9.61538	0.047896	ENSMUSG00000024935, ENSMUSG00000028410, ENSMUSG00000026473, ENSMUSG00000020889, ENSMUSG00000038375, ENSMUSG00000059201, ENSMUSG00000006611, ENSMUSG00000039956, ENSMUSG00000055866, ENSMUSG00000000440	93	1012	19596	2.08211	1	0.42623	0.411583
GOTERM_BP_FAT	GO:0048512~circadian behavior	3	2.88462	0.0485049	ENSMUSG00000021775, ENSMUSG00000042429, ENSMUSG00000028957	93	75	19596	8.42839	1	0.430334	0.415545
GOTERM_BP_FAT	GO:0051094~positive regulation of developmental process	14	13.4615	0.0489178	ENSMUSG00000035877, ENSMUSG00000032452, ENSMUSG00000027111, ENSMUSG00000059201, ENSMUSG00000096255, ENSMUSG00000044338, ENSMUSG00000026833, ENSMUSG00000000440, ENSMUSG00000045776, ENSMUSG00000024924, ENSMUSG00000000628, ENSMUSG00000021701, ENSMUSG00000066687, ENSMUSG00000045382	93	1675	19596	1.76116	1	0.432677	0.417808
GOTERM_BP_FAT	GO:1902531~regulation of intracellular signal transduction	15	14.4231	0.0495864	ENSMUSG00000030683, ENSMUSG00000031442, ENSMUSG00000057315, ENSMUSG00000056313, ENSMUSG00000026672, ENSMUSG00000028410, ENSMUSG00000059201, ENSMUSG00000096255, ENSMUSG00000042429, ENSMUSG00000044338, ENSMUSG00000049327, ENSMUSG00000000440, ENSMUSG00000020889, ENSMUSG00000045382, ENSMUSG00000032911	93	1850	19596	1.70846	1	0.436652	0.421647
GOTERM_BP_FAT	GO:0006094~gluconeogenesis	3	2.88462	0.0496673	ENSMUSG00000023019, ENSMUSG00000030747, ENSMUSG00000055866	93	76	19596	8.31749	1	0.436652	0.421647
GOTERM_BP_FAT	GO:0097746~regulation of blood vessel diameter	4	3.84615	0.0514682	ENSMUSG00000037010, ENSMUSG00000059201, ENSMUSG00000042429, ENSMUSG00000055866	93	178	19596	4.73505	1	0.447082	0.431718
GOTERM_BP_FAT	GO:0051336~regulation of hydrolase activity	11	10.5769	0.0512265	ENSMUSG00000066364, ENSMUSG00000024935, ENSMUSG00000057315, ENSMUSG00000027111, ENSMUSG00000066366, ENSMUSG00000039782, ENSMUSG00000096255, ENSMUSG00000020593, ENSMUSG00000038007, ENSMUSG00000000440, ENSMUSG00000063060	93	1186	19596	1.95431	1	0.447082	0.431718
GOTERM_BP_FAT	GO:0050880~regulation of blood vessel size	4	3.84615	0.0514682	ENSMUSG00000037010, ENSMUSG00000059201, ENSMUSG00000042429, ENSMUSG00000055866	93	178	19596	4.73505	1	0.447082	0.431718
GOTERM_BP_FAT	GO:0035296~regulation of tube diameter	4	3.84615	0.0514682	ENSMUSG00000037010, ENSMUSG00000059201, ENSMUSG00000042429, ENSMUSG00000055866	93	178	19596	4.73505	1	0.447082	0.431718
GOTERM_BP_FAT	GO:0035150~regulation of tube size	4	3.84615	0.0521736	ENSMUSG00000037010, ENSMUSG00000059201, ENSMUSG00000042429, ENSMUSG00000055866	93	179	19596	4.7086	1	0.449186	0.433751
GOTERM_BP_FAT	GO:0010675~regulation of cellular carbohydrate metabolic process	4	3.84615	0.0521736	ENSMUSG00000067279, ENSMUSG00000059201, ENSMUSG00000030747, ENSMUSG00000049999	93	179	19596	4.7086	1	0.449186	0.433751
GOTERM_BP_FAT	GO:0007622~rhythmic behavior	3	2.88462	0.0520221	ENSMUSG00000021775, ENSMUSG00000042429, ENSMUSG00000028957	93	78	19596	8.10422	1	0.449186	0.433751
GOTERM_BP_FAT	GO:1902532~negative regulation of intracellular signal transduction	7	6.73077	0.0531527	ENSMUSG00000057315, ENSMUSG00000026672, ENSMUSG00000028410, ENSMUSG00000020889, ENSMUSG00000096255, ENSMUSG00000044338, ENSMUSG00000000440	93	574	19596	2.56963	1	0.451469	0.435954
GOTERM_BP_FAT	GO:0048260~positive regulation of receptor-mediated endocytosis	3	2.88462	0.0532144	ENSMUSG00000037010, ENSMUSG00000006611, ENSMUSG00000000440	93	79	19596	8.00163	1	0.451469	0.435954
GOTERM_BP_FAT	GO:0042981~regulation of apoptotic process	14	13.4615	0.0526828	ENSMUSG00000056313, ENSMUSG00000026672, ENSMUSG00000028410, ENSMUSG00000027111, ENSMUSG00000059201, ENSMUSG00000042429, ENSMUSG00000026833, ENSMUSG00000000440, ENSMUSG00000024935, ENSMUSG00000021701, ENSMUSG00000066687, ENSMUSG00000038007, ENSMUSG00000063060, ENSMUSG00000018217	93	1694	19596	1.7414	1	0.451469	0.435954
GOTERM_BP_FAT	GO:0019319~hexose biosynthetic process	3	2.88462	0.0532144	ENSMUSG00000023019, ENSMUSG00000030747, ENSMUSG00000055866	93	79	19596	8.00163	1	0.451469	0.435954
GOTERM_BP_FAT	GO:0006733~oxidoreduction coenzyme metabolic process	4	3.84615	0.0528837	ENSMUSG00000023019, ENSMUSG00000032279, ENSMUSG00000000628, ENSMUSG00000030246	93	180	19596	4.68244	1	0.451469	0.435954
GOTERM_BP_FAT	GO:0048871~multicellular organismal homeostasis	6	5.76923	0.0536194	ENSMUSG00000021775, ENSMUSG00000037010, ENSMUSG00000020889, ENSMUSG00000038375, ENSMUSG00000042429, ENSMUSG00000006611	93	434	19596	2.91304	1	0.453583	0.437996
GOTERM_BP_FAT	GO:0051129~negative regulation of cellular component organization	9	8.65385	0.0540381	ENSMUSG00000057315, ENSMUSG00000021701, ENSMUSG00000027750, ENSMUSG00000032911, ENSMUSG00000039956, ENSMUSG00000055866, ENSMUSG00000000440, ENSMUSG00000018217, ENSMUSG00000002058	93	878	19596	2.15989	1	0.4558	0.440136
GOTERM_BP_FAT	GO:0031642~negative regulation of myelination	2	1.92308	0.0549208	ENSMUSG00000023915, ENSMUSG00000020593	93	12	19596	35.1183	1	0.461096	0.445251
GOTERM_BP_FAT	GO:0009205~purine ribonucleoside triphosphate metabolic process	5	4.80769	0.054983	ENSMUSG00000023019, ENSMUSG00000000628, ENSMUSG00000100862, ENSMUSG00000064354, ENSMUSG00000064358	93	304	19596	3.46562	1	0.461096	0.445251
GOTERM_BP_FAT	GO:0045184~establishment of protein localization	15	14.4231	0.055178	ENSMUSG00000026672, ENSMUSG00000028410, ENSMUSG00000026473, ENSMUSG00000059201, ENSMUSG00000096255, ENSMUSG00000042429, ENSMUSG00000042249, ENSMUSG00000000440, ENSMUSG00000002058, ENSMUSG00000024924, ENSMUSG00000024935, ENSMUSG00000000628, ENSMUSG00000020889, ENSMUSG00000067279, ENSMUSG00000055866	93	1879	19596	1.68209	1	0.461106	0.44526
GOTERM_BP_FAT	GO:0016477~cell migration	13	12.5	0.055301	ENSMUSG00000057315, ENSMUSG00000027750, ENSMUSG00000027111, ENSMUSG00000026473, ENSMUSG00000059201, ENSMUSG00000042429, ENSMUSG00000026833, ENSMUSG00000000440, ENSMUSG00000021701, ENSMUSG00000096768, ENSMUSG00000045382, ENSMUSG00000032911, ENSMUSG00000018217	93	1536	19596	1.78335	1	0.461106	0.44526
GOTERM_BP_FAT	GO:0045333~cellular respiration	4	3.84615	0.0557708	ENSMUSG00000023019, ENSMUSG00000032279, ENSMUSG00000064354, ENSMUSG00000064358	93	184	19596	4.58065	1	0.462373	0.446484
GOTERM_BP_FAT	GO:0006919~activation of cysteine-type endopeptidase activity involved in apoptotic process	3	2.88462	0.0556278	ENSMUSG00000024935, ENSMUSG00000038007, ENSMUSG00000000440	93	81	19596	7.80406	1	0.462373	0.446484
GOTERM_BP_FAT	GO:0071375~cellular response to peptide hormone stimulus	5	4.80769	0.0560625	ENSMUSG00000039782, ENSMUSG00000059201, ENSMUSG00000051596, ENSMUSG00000020593, ENSMUSG00000000440	93	306	19596	3.44297	1	0.462944	0.447035
GOTERM_BP_FAT	GO:0043603~cellular amide metabolic process	11	10.5769	0.0561578	ENSMUSG00000064372, ENSMUSG00000069049, ENSMUSG00000024935, ENSMUSG00000020190, ENSMUSG00000039782, ENSMUSG00000073565, ENSMUSG00000026833, ENSMUSG00000038007, ENSMUSG00000055866, ENSMUSG00000000440, ENSMUSG00000064339	93	1206	19596	1.9219	1	0.462944	0.447035
GOTERM_BP_FAT	GO:0006954~inflammatory response	8	7.69231	0.056493	ENSMUSG00000021775, ENSMUSG00000020889, ENSMUSG00000066366, ENSMUSG00000059201, ENSMUSG00000042429, ENSMUSG00000032911, ENSMUSG00000006611, ENSMUSG00000000440	93	732	19596	2.30284	1	0.464392	0.448433
GOTERM_BP_FAT	GO:1903670~regulation of sprouting angiogenesis	3	2.88462	0.0568489	ENSMUSG00000021701, ENSMUSG00000026473, ENSMUSG00000044338	93	82	19596	7.70889	1	0.466	0.449987
GOTERM_BP_FAT	GO:0072593~reactive oxygen species metabolic process	5	4.80769	0.058256	ENSMUSG00000024935, ENSMUSG00000000628, ENSMUSG00000064354, ENSMUSG00000059201, ENSMUSG00000031924	93	310	19596	3.39854	1	0.470902	0.45472
GOTERM_BP_FAT	GO:0051093~negative regulation of developmental process	11	10.5769	0.0579561	ENSMUSG00000021701, ENSMUSG00000027750, ENSMUSG00000066687, ENSMUSG00000023915, ENSMUSG00000059201, ENSMUSG00000096255, ENSMUSG00000020593, ENSMUSG00000032911, ENSMUSG00000026833, ENSMUSG00000000440, ENSMUSG00000018217	93	1213	19596	1.9108	1	0.470902	0.45472
GOTERM_BP_FAT	GO:0010952~positive regulation of peptidase activity	4	3.84615	0.0579848	ENSMUSG00000024935, ENSMUSG00000038007, ENSMUSG00000000440, ENSMUSG00000063060	93	187	19596	4.50716	1	0.470902	0.45472
GOTERM_BP_FAT	GO:0009167~purine ribonucleoside monophosphate metabolic process	5	4.80769	0.0577033	ENSMUSG00000023019, ENSMUSG00000000628, ENSMUSG00000100862, ENSMUSG00000064354, ENSMUSG00000064358	93	309	19596	3.40954	1	0.470902	0.45472
GOTERM_BP_FAT	GO:0009126~purine nucleoside monophosphate metabolic process	5	4.80769	0.058256	ENSMUSG00000023019, ENSMUSG00000000628, ENSMUSG00000100862, ENSMUSG00000064354, ENSMUSG00000064358	93	310	19596	3.39854	1	0.470902	0.45472
GOTERM_BP_FAT	GO:0009144~purine nucleoside triphosphate metabolic process	5	4.80769	0.0588115	ENSMUSG00000023019, ENSMUSG00000000628, ENSMUSG00000100862, ENSMUSG00000064354, ENSMUSG00000064358	93	311	19596	3.38762	1	0.474076	0.457784
GOTERM_BP_FAT	GO:2000489~regulation of hepatic stellate cell activation	2	1.92308	0.0593605	ENSMUSG00000020889, ENSMUSG00000059201	93	13	19596	32.4169	1	0.475695	0.459349
GOTERM_BP_FAT	GO:1901700~response to oxygen-containing compound	16	15.3846	0.0595028	ENSMUSG00000030087, ENSMUSG00000027750, ENSMUSG00000026473, ENSMUSG00000059201, ENSMUSG00000020593, ENSMUSG00000000440, ENSMUSG00000023019, ENSMUSG00000024935, ENSMUSG00000020889, ENSMUSG00000066366, ENSMUSG00000039782, ENSMUSG00000053907, ENSMUSG00000030747, ENSMUSG00000030249, ENSMUSG00000051596, ENSMUSG00000038007	93	2076	19596	1.62397	1	0.475695	0.459349
GOTERM_BP_FAT	GO:0009199~ribonucleoside triphosphate metabolic process	5	4.80769	0.0593698	ENSMUSG00000023019, ENSMUSG00000000628, ENSMUSG00000100862, ENSMUSG00000064354, ENSMUSG00000064358	93	312	19596	3.37676	1	0.475695	0.459349
GOTERM_BP_FAT	GO:0052547~regulation of peptidase activity	6	5.76923	0.0607448	ENSMUSG00000066364, ENSMUSG00000024935, ENSMUSG00000066366, ENSMUSG00000038007, ENSMUSG00000000440, ENSMUSG00000063060	93	450	19596	2.80946	1	0.484294	0.467651
GOTERM_BP_FAT	GO:0030534~adult behavior	4	3.84615	0.061001	ENSMUSG00000030683, ENSMUSG00000024935, ENSMUSG00000059201, ENSMUSG00000018217	93	191	19596	4.41277	1	0.485008	0.468341
GOTERM_BP_FAT	GO:0046364~monosaccharide biosynthetic process	3	2.88462	0.0618256	ENSMUSG00000023019, ENSMUSG00000030747, ENSMUSG00000055866	93	86	19596	7.35034	1	0.48625	0.46954
GOTERM_BP_FAT	GO:0019915~lipid storage	3	2.88462	0.0618256	ENSMUSG00000059201, ENSMUSG00000030747, ENSMUSG00000000440	93	86	19596	7.35034	1	0.48625	0.46954
GOTERM_BP_FAT	GO:0009991~response to extracellular stimulus	7	6.73077	0.0615381	ENSMUSG00000027750, ENSMUSG00000027111, ENSMUSG00000026473, ENSMUSG00000059201, ENSMUSG00000010064, ENSMUSG00000006611, ENSMUSG00000000440	93	596	19596	2.47478	1	0.48625	0.46954
GOTERM_BP_FAT	GO:0006414~translational elongation	3	2.88462	0.0618256	ENSMUSG00000064372, ENSMUSG00000069049, ENSMUSG00000039782	93	86	19596	7.35034	1	0.48625	0.46954
GOTERM_BP_FAT	GO:1904925~positive regulation of mitophagy in response to mitochondrial depolarization	2	1.92308	0.0637796	ENSMUSG00000000628, ENSMUSG00000026672	93	14	19596	30.1014	1	0.492304	0.475387
GOTERM_BP_FAT	GO:1904923~regulation of mitophagy in response to mitochondrial depolarization	2	1.92308	0.0637796	ENSMUSG00000000628, ENSMUSG00000026672	93	14	19596	30.1014	1	0.492304	0.475387
GOTERM_BP_FAT	GO:0051938~L-glutamate import	2	1.92308	0.0637796	ENSMUSG00000024935, ENSMUSG00000055866	93	14	19596	30.1014	1	0.492304	0.475387
GOTERM_BP_FAT	GO:0045906~negative regulation of vasoconstriction	2	1.92308	0.0637796	ENSMUSG00000037010, ENSMUSG00000059201	93	14	19596	30.1014	1	0.492304	0.475387
GOTERM_BP_FAT	GO:0043471~regulation of cellular carbohydrate catabolic process	2	1.92308	0.0637796	ENSMUSG00000067279, ENSMUSG00000049999	93	14	19596	30.1014	1	0.492304	0.475387
GOTERM_BP_FAT	GO:0033197~response to vitamin E	2	1.92308	0.0637796	ENSMUSG00000059201, ENSMUSG00000000440	93	14	19596	30.1014	1	0.492304	0.475387
GOTERM_BP_FAT	GO:0002674~negative regulation of acute inflammatory response	2	1.92308	0.0637796	ENSMUSG00000042429, ENSMUSG00000000440	93	14	19596	30.1014	1	0.492304	0.475387
GOTERM_BP_FAT	GO:0034613~cellular protein localization	15	14.4231	0.064034	ENSMUSG00000026672, ENSMUSG00000028410, ENSMUSG00000026473, ENSMUSG00000059201, ENSMUSG00000096255, ENSMUSG00000042429, ENSMUSG00000006611, ENSMUSG00000042249, ENSMUSG00000000440, ENSMUSG00000024935, ENSMUSG00000000628, ENSMUSG00000066687, ENSMUSG00000067279, ENSMUSG00000038375, ENSMUSG00000039956	93	1921	19596	1.64531	1	0.49296	0.47602
GOTERM_BP_FAT	GO:0019229~regulation of vasoconstriction	3	2.88462	0.0643679	ENSMUSG00000037010, ENSMUSG00000059201, ENSMUSG00000055866	93	88	19596	7.18328	1	0.494223	0.47724
GOTERM_BP_FAT	GO:2000113~negative regulation of cellular macromolecule biosynthetic process	14	13.4615	0.0649403	ENSMUSG00000035877, ENSMUSG00000059201, ENSMUSG00000003038, ENSMUSG00000020593, ENSMUSG00000028957, ENSMUSG00000049327, ENSMUSG00000000440, ENSMUSG00000021775, ENSMUSG00000066687, ENSMUSG00000020889, ENSMUSG00000039782, ENSMUSG00000038007, ENSMUSG00000055866, ENSMUSG00000063060	93	1750	19596	1.68568	1	0.497306	0.480217
GOTERM_BP_FAT	GO:0045834~positive regulation of lipid metabolic process	4	3.84615	0.0656607	ENSMUSG00000020889, ENSMUSG00000030747, ENSMUSG00000042429, ENSMUSG00000000440	93	197	19596	4.27837	1	0.50019	0.483001
GOTERM_BP_FAT	GO:0016575~histone deacetylation	3	2.88462	0.0656522	ENSMUSG00000020593, ENSMUSG00000044338, ENSMUSG00000055866	93	89	19596	7.10257	1	0.50019	0.483001
GOTERM_BP_FAT	GO:0070727~cellular macromolecule localization	15	14.4231	0.0665051	ENSMUSG00000026672, ENSMUSG00000028410, ENSMUSG00000026473, ENSMUSG00000059201, ENSMUSG00000096255, ENSMUSG00000042429, ENSMUSG00000006611, ENSMUSG00000042249, ENSMUSG00000000440, ENSMUSG00000024935, ENSMUSG00000000628, ENSMUSG00000066687, ENSMUSG00000067279, ENSMUSG00000038375, ENSMUSG00000039956	93	1932	19596	1.63594	1	0.5053	0.487936
GOTERM_BP_FAT	GO:0008104~protein localization	19	18.2692	0.0667506	ENSMUSG00000026672, ENSMUSG00000028410, ENSMUSG00000026473, ENSMUSG00000059201, ENSMUSG00000096255, ENSMUSG00000042429, ENSMUSG00000006611, ENSMUSG00000042249, ENSMUSG00000000440, ENSMUSG00000002058, ENSMUSG00000024924, ENSMUSG00000024935, ENSMUSG00000000628, ENSMUSG00000066687, ENSMUSG00000020889, ENSMUSG00000067279, ENSMUSG00000038375, ENSMUSG00000039956, ENSMUSG00000055866	93	2653	19596	1.50904	1	0.505844	0.488461
GOTERM_BP_FAT	GO:0050731~positive regulation of peptidyl-tyrosine phosphorylation	4	3.84615	0.0680505	ENSMUSG00000059201, ENSMUSG00000042429, ENSMUSG00000032911, ENSMUSG00000002058	93	200	19596	4.21419	1	0.509325	0.491822
GOTERM_BP_FAT	GO:0045766~positive regulation of angiogenesis	4	3.84615	0.0680505	ENSMUSG00000000628, ENSMUSG00000021701, ENSMUSG00000045382, ENSMUSG00000044338	93	200	19596	4.21419	1	0.509325	0.491822
GOTERM_BP_FAT	GO:0009161~ribonucleoside monophosphate metabolic process	5	4.80769	0.068085	ENSMUSG00000023019, ENSMUSG00000000628, ENSMUSG00000100862, ENSMUSG00000064354, ENSMUSG00000064358	93	327	19596	3.22186	1	0.509325	0.491822
GOTERM_BP_FAT	GO:0009150~purine ribonucleotide metabolic process	6	5.76923	0.067894	ENSMUSG00000023019, ENSMUSG00000000628, ENSMUSG00000100862, ENSMUSG00000064354, ENSMUSG00000018846, ENSMUSG00000064358	93	465	19596	2.71883	1	0.509325	0.491822
GOTERM_BP_FAT	GO:0008016~regulation of heart contraction	4	3.84615	0.0680505	ENSMUSG00000024935, ENSMUSG00000037010, ENSMUSG00000030249, ENSMUSG00000042429	93	200	19596	4.21419	1	0.509325	0.491822
GOTERM_BP_FAT	GO:0010468~regulation of gene expression	31	29.8077	0.0684985	ENSMUSG00000035877, ENSMUSG00000030087, ENSMUSG00000056313, ENSMUSG00000027111, ENSMUSG00000059201, ENSMUSG00000006611, ENSMUSG00000049327, ENSMUSG00000022389, ENSMUSG00000069049, ENSMUSG00000021775, ENSMUSG00000003949, ENSMUSG00000037010, ENSMUSG00000020889, ENSMUSG00000055866, ENSMUSG00000063060, ENSMUSG00000018217, ENSMUSG00000059824, ENSMUSG00000031442, ENSMUSG00000020190, ENSMUSG00000026672,…	93	4948	19596	1.32013	1	0.511104	0.49354
GOTERM_BP_FAT	GO:0031347~regulation of defense response	8	7.69231	0.0689282	ENSMUSG00000021775, ENSMUSG00000026672, ENSMUSG00000020889, ENSMUSG00000059201, ENSMUSG00000042429, ENSMUSG00000051596, ENSMUSG00000000440, ENSMUSG00000018217	93	767	19596	2.19775	1	0.512995	0.495366
GOTERM_BP_FAT	GO:0045685~regulation of glial cell differentiation	3	2.88462	0.0695563	ENSMUSG00000023915, ENSMUSG00000045382, ENSMUSG00000000440	93	92	19596	6.87097	1	0.516349	0.498605
GOTERM_BP_FAT	GO:1903978~regulation of microglial cell activation	2	1.92308	0.0725563	ENSMUSG00000020889, ENSMUSG00000000440	93	16	19596	26.3387	1	0.519464	0.501613
GOTERM_BP_FAT	GO:1903507~negative regulation of nucleic acid-templated transcription	12	11.5385	0.0726536	ENSMUSG00000021775, ENSMUSG00000035877, ENSMUSG00000066687, ENSMUSG00000020889, ENSMUSG00000059201, ENSMUSG00000003038, ENSMUSG00000020593, ENSMUSG00000028957, ENSMUSG00000049327, ENSMUSG00000055866, ENSMUSG00000000440, ENSMUSG00000063060	93	1435	19596	1.76203	1	0.519464	0.501613
GOTERM_BP_FAT	GO:0055089~fatty acid homeostasis	2	1.92308	0.0725563	ENSMUSG00000030747, ENSMUSG00000042429	93	16	19596	26.3387	1	0.519464	0.501613
GOTERM_BP_FAT	GO:0051347~positive regulation of transferase activity	7	6.73077	0.0719759	ENSMUSG00000024924, ENSMUSG00000024935, ENSMUSG00000056313, ENSMUSG00000059201, ENSMUSG00000042429, ENSMUSG00000032911, ENSMUSG00000002058	93	621	19596	2.37515	1	0.519464	0.501613
GOTERM_BP_FAT	GO:0051099~positive regulation of binding	4	3.84615	0.0712982	ENSMUSG00000018169, ENSMUSG00000021701, ENSMUSG00000006611, ENSMUSG00000000440	93	204	19596	4.13156	1	0.519464	0.501613
GOTERM_BP_FAT	GO:0050673~epithelial cell proliferation	6	5.76923	0.0724004	ENSMUSG00000037010, ENSMUSG00000026473, ENSMUSG00000020889, ENSMUSG00000059201, ENSMUSG00000044338, ENSMUSG00000000440	93	474	19596	2.66721	1	0.519464	0.501613
GOTERM_BP_FAT	GO:0045892~negative regulation of transcription, DNA-templated	12	11.5385	0.0715309	ENSMUSG00000021775, ENSMUSG00000035877, ENSMUSG00000066687, ENSMUSG00000020889, ENSMUSG00000059201, ENSMUSG00000003038, ENSMUSG00000020593, ENSMUSG00000028957, ENSMUSG00000049327, ENSMUSG00000055866, ENSMUSG00000000440, ENSMUSG00000063060	93	1431	19596	1.76696	1	0.519464	0.501613
GOTERM_BP_FAT	GO:0043031~negative regulation of macrophage activation	2	1.92308	0.0725563	ENSMUSG00000020889, ENSMUSG00000000440	93	16	19596	26.3387	1	0.519464	0.501613
GOTERM_BP_FAT	GO:0035358~regulation of peroxisome proliferator activated receptor signaling pathway	2	1.92308	0.0725563	ENSMUSG00000059201, ENSMUSG00000027533	93	16	19596	26.3387	1	0.519464	0.501613
GOTERM_BP_FAT	GO:0033036~macromolecule localization	21	20.1923	0.072042	ENSMUSG00000026672, ENSMUSG00000028410, ENSMUSG00000026473, ENSMUSG00000059201, ENSMUSG00000027533, ENSMUSG00000096255, ENSMUSG00000042429, ENSMUSG00000006611, ENSMUSG00000042249, ENSMUSG00000000440, ENSMUSG00000002058, ENSMUSG00000024924, ENSMUSG00000024935, ENSMUSG00000000628, ENSMUSG00000066687, ENSMUSG00000020889, ENSMUSG00000067279, ENSMUSG00000038375, ENSMUSG00000030747, ENSMUSG00000039956,…	93	3050	19596	1.45079	1	0.519464	0.501613
GOTERM_BP_FAT	GO:0031100~animal organ regeneration	3	2.88462	0.0708744	ENSMUSG00000020593, ENSMUSG00000006611, ENSMUSG00000000440	93	93	19596	6.79709	1	0.519464	0.501613
GOTERM_BP_FAT	GO:0030162~regulation of proteolysis	8	7.69231	0.0708299	ENSMUSG00000066364, ENSMUSG00000024935, ENSMUSG00000021701, ENSMUSG00000066366, ENSMUSG00000006611, ENSMUSG00000038007, ENSMUSG00000000440, ENSMUSG00000063060	93	772	19596	2.18352	1	0.519464	0.501613
GOTERM_BP_FAT	GO:0022904~respiratory electron transport chain	3	2.88462	0.0722006	ENSMUSG00000023019, ENSMUSG00000064354, ENSMUSG00000064358	93	94	19596	6.72478	1	0.519464	0.501613
GOTERM_BP_FAT	GO:0009141~nucleoside triphosphate metabolic process	5	4.80769	0.0711304	ENSMUSG00000023019, ENSMUSG00000000628, ENSMUSG00000100862, ENSMUSG00000064354, ENSMUSG00000064358	93	332	19596	3.17334	1	0.519464	0.501613
GOTERM_BP_FAT	GO:0002695~negative regulation of leukocyte activation	4	3.84615	0.0712982	ENSMUSG00000020889, ENSMUSG00000023915, ENSMUSG00000006611, ENSMUSG00000000440	93	204	19596	4.13156	1	0.519464	0.501613
GOTERM_BP_FAT	GO:0051674~localization of cell	14	13.4615	0.07505	ENSMUSG00000057315, ENSMUSG00000028410, ENSMUSG00000027750, ENSMUSG00000027111, ENSMUSG00000026473, ENSMUSG00000059201, ENSMUSG00000042429, ENSMUSG00000026833, ENSMUSG00000000440, ENSMUSG00000021701, ENSMUSG00000096768, ENSMUSG00000045382, ENSMUSG00000032911, ENSMUSG00000018217	93	1791	19596	1.64709	1	0.519989	0.50212
GOTERM_BP_FAT	GO:0051248~negative regulation of protein metabolic process	11	10.5769	0.0740256	ENSMUSG00000066364, ENSMUSG00000030087, ENSMUSG00000028410, ENSMUSG00000066366, ENSMUSG00000039782, ENSMUSG00000096255, ENSMUSG00000006611, ENSMUSG00000026833, ENSMUSG00000038007, ENSMUSG00000055866, ENSMUSG00000000440	93	1270	19596	1.82504	1	0.519989	0.50212
GOTERM_BP_FAT	GO:0051235~maintenance of location	5	4.80769	0.0748763	ENSMUSG00000000628, ENSMUSG00000059201, ENSMUSG00000030747, ENSMUSG00000044338, ENSMUSG00000000440	93	338	19596	3.11701	1	0.519989	0.50212
GOTERM_BP_FAT	GO:0051223~regulation of protein transport	7	6.73077	0.074625	ENSMUSG00000024935, ENSMUSG00000028410, ENSMUSG00000026473, ENSMUSG00000020889, ENSMUSG00000059201, ENSMUSG00000055866, ENSMUSG00000000440	93	627	19596	2.35242	1	0.519989	0.50212
GOTERM_BP_FAT	GO:0050807~regulation of synapse organization	4	3.84615	0.0746148	ENSMUSG00000045776, ENSMUSG00000032452, ENSMUSG00000072235, ENSMUSG00000002341	93	208	19596	4.05211	1	0.519989	0.50212
GOTERM_BP_FAT	GO:0050796~regulation of insulin secretion	4	3.84615	0.0729479	ENSMUSG00000026473, ENSMUSG00000020889, ENSMUSG00000059201, ENSMUSG00000055866	93	206	19596	4.09145	1	0.519989	0.50212
GOTERM_BP_FAT	GO:0048870~cell motility	14	13.4615	0.07505	ENSMUSG00000057315, ENSMUSG00000028410, ENSMUSG00000027750, ENSMUSG00000027111, ENSMUSG00000026473, ENSMUSG00000059201, ENSMUSG00000042429, ENSMUSG00000026833, ENSMUSG00000000440, ENSMUSG00000021701, ENSMUSG00000096768, ENSMUSG00000045382, ENSMUSG00000032911, ENSMUSG00000018217	93	1791	19596	1.64709	1	0.519989	0.50212
GOTERM_BP_FAT	GO:0030182~neuron differentiation	13	12.5	0.0736841	ENSMUSG00000027750, ENSMUSG00000027111, ENSMUSG00000059201, ENSMUSG00000042834, ENSMUSG00000096255, ENSMUSG00000026833, ENSMUSG00000045776, ENSMUSG00000024924, ENSMUSG00000021701, ENSMUSG00000023915, ENSMUSG00000045382, ENSMUSG00000032911, ENSMUSG00000018217	93	1611	19596	1.70033	1	0.519989	0.50212
GOTERM_BP_FAT	GO:0014823~response to activity	3	2.88462	0.0748772	ENSMUSG00000027750, ENSMUSG00000059201, ENSMUSG00000045382	93	96	19596	6.58468	1	0.519989	0.50212
GOTERM_BP_FAT	GO:0009896~positive regulation of catabolic process	6	5.76923	0.0739385	ENSMUSG00000023019, ENSMUSG00000000628, ENSMUSG00000021701, ENSMUSG00000026672, ENSMUSG00000038375, ENSMUSG00000042429	93	477	19596	2.65044	1	0.519989	0.50212
GOTERM_BP_FAT	GO:0009123~nucleoside monophosphate metabolic process	5	4.80769	0.0748763	ENSMUSG00000023019, ENSMUSG00000000628, ENSMUSG00000100862, ENSMUSG00000064354, ENSMUSG00000064358	93	338	19596	3.11701	1	0.519989	0.50212
GOTERM_BP_FAT	GO:0008593~regulation of Notch signaling pathway	3	2.88462	0.0748772	ENSMUSG00000018169, ENSMUSG00000056313, ENSMUSG00000027750	93	96	19596	6.58468	1	0.519989	0.50212
GOTERM_BP_FAT	GO:0002793~positive regulation of peptide secretion	4	3.84615	0.0737792	ENSMUSG00000037010, ENSMUSG00000026473, ENSMUSG00000042429, ENSMUSG00000006611	93	207	19596	4.07168	1	0.519989	0.50212
GOTERM_BP_FAT	GO:0060334~regulation of interferon-gamma-mediated signaling pathway	2	1.92308	0.076914	ENSMUSG00000051596, ENSMUSG00000000440	93	17	19596	24.7894	1	0.524168	0.506156
GOTERM_BP_FAT	GO:0060330~regulation of response to interferon-gamma	2	1.92308	0.076914	ENSMUSG00000051596, ENSMUSG00000000440	93	17	19596	24.7894	1	0.524168	0.506156
GOTERM_BP_FAT	GO:0051050~positive regulation of transport	10	9.61538	0.0766349	ENSMUSG00000030087, ENSMUSG00000037010, ENSMUSG00000026473, ENSMUSG00000059201, ENSMUSG00000045382, ENSMUSG00000042429, ENSMUSG00000010064, ENSMUSG00000006611, ENSMUSG00000044338, ENSMUSG00000000440	93	1111	19596	1.89658	1	0.524168	0.506156
GOTERM_BP_FAT	GO:0034654~nucleobase-containing compound biosynthetic process	27	25.9615	0.0761242	ENSMUSG00000035877, ENSMUSG00000030087, ENSMUSG00000056313, ENSMUSG00000027111, ENSMUSG00000059201, ENSMUSG00000006611, ENSMUSG00000049327, ENSMUSG00000022389, ENSMUSG00000021775, ENSMUSG00000003949, ENSMUSG00000037010, ENSMUSG00000064354, ENSMUSG00000020889, ENSMUSG00000055866, ENSMUSG00000063060, ENSMUSG00000059824, ENSMUSG00000031442, ENSMUSG00000003038, ENSMUSG00000020593, ENSMUSG00000028957,…	93	4214	19596	1.35006	1	0.524168	0.506156
GOTERM_BP_FAT	GO:0031397~negative regulation of protein ubiquitination	3	2.88462	0.0762274	ENSMUSG00000028410, ENSMUSG00000006611, ENSMUSG00000055866	93	97	19596	6.51679	1	0.524168	0.506156
GOTERM_BP_FAT	GO:0010558~negative regulation of macromolecule biosynthetic process	14	13.4615	0.0760889	ENSMUSG00000035877, ENSMUSG00000059201, ENSMUSG00000003038, ENSMUSG00000020593, ENSMUSG00000028957, ENSMUSG00000049327, ENSMUSG00000000440, ENSMUSG00000021775, ENSMUSG00000066687, ENSMUSG00000020889, ENSMUSG00000039782, ENSMUSG00000038007, ENSMUSG00000055866, ENSMUSG00000063060	93	1795	19596	1.64342	1	0.524168	0.506156
GOTERM_BP_FAT	GO:0006163~purine nucleotide metabolic process	6	5.76923	0.0765418	ENSMUSG00000023019, ENSMUSG00000000628, ENSMUSG00000100862, ENSMUSG00000064354, ENSMUSG00000018846, ENSMUSG00000064358	93	482	19596	2.62294	1	0.524168	0.506156
GOTERM_BP_FAT	GO:1902679~negative regulation of RNA biosynthetic process	12	11.5385	0.0778471	ENSMUSG00000021775, ENSMUSG00000035877, ENSMUSG00000066687, ENSMUSG00000020889, ENSMUSG00000059201, ENSMUSG00000003038, ENSMUSG00000020593, ENSMUSG00000028957, ENSMUSG00000049327, ENSMUSG00000055866, ENSMUSG00000000440, ENSMUSG00000063060	93	1453	19596	1.7402	1	0.529287	0.511099
GOTERM_BP_FAT	GO:0009259~ribonucleotide metabolic process	6	5.76923	0.0781276	ENSMUSG00000023019, ENSMUSG00000000628, ENSMUSG00000100862, ENSMUSG00000064354, ENSMUSG00000018846, ENSMUSG00000064358	93	485	19596	2.60672	1	0.529956	0.511745
GOTERM_BP_FAT	GO:0043043~peptide biosynthetic process	8	7.69231	0.0787507	ENSMUSG00000064372, ENSMUSG00000069049, ENSMUSG00000024935, ENSMUSG00000039782, ENSMUSG00000073565, ENSMUSG00000055866, ENSMUSG00000000440, ENSMUSG00000064339	93	792	19596	2.12838	1	0.532941	0.514627
GOTERM_BP_FAT	GO:0003018~vascular process in circulatory system	4	3.84615	0.0797165	ENSMUSG00000037010, ENSMUSG00000059201, ENSMUSG00000042429, ENSMUSG00000055866	93	214	19596	3.9385	1	0.538225	0.51973
GOTERM_BP_FAT	GO:0032940~secretion by cell	9	8.65385	0.0799925	ENSMUSG00000037010, ENSMUSG00000026473, ENSMUSG00000020889, ENSMUSG00000059201, ENSMUSG00000042429, ENSMUSG00000049303, ENSMUSG00000006611, ENSMUSG00000055866, ENSMUSG00000000440	93	956	19596	1.98367	1	0.538838	0.520321
GOTERM_BP_FAT	GO:0071356~cellular response to tumor necrosis factor	4	3.84615	0.0805814	ENSMUSG00000023019, ENSMUSG00000027750, ENSMUSG00000020889, ENSMUSG00000023915	93	215	19596	3.92018	1	0.541552	0.522942
GOTERM_BP_FAT	GO:0050768~negative regulation of neurogenesis	5	4.80769	0.0813382	ENSMUSG00000021701, ENSMUSG00000096255, ENSMUSG00000032911, ENSMUSG00000026833, ENSMUSG00000018217	93	348	19596	3.02744	1	0.542877	0.524221
GOTERM_BP_FAT	GO:0042754~negative regulation of circadian rhythm	2	1.92308	0.0812515	ENSMUSG00000042429, ENSMUSG00000055866	93	18	19596	23.4122	1	0.542877	0.524221
GOTERM_BP_FAT	GO:0031400~negative regulation of protein modification process	7	6.73077	0.0810222	ENSMUSG00000030087, ENSMUSG00000028410, ENSMUSG00000096255, ENSMUSG00000006611, ENSMUSG00000038007, ENSMUSG00000055866, ENSMUSG00000000440	93	641	19596	2.30104	1	0.542877	0.524221
GOTERM_BP_FAT	GO:1901135~carbohydrate derivative metabolic process	10	9.61538	0.0831612	ENSMUSG00000024747, ENSMUSG00000023019, ENSMUSG00000000628, ENSMUSG00000100862, ENSMUSG00000064354, ENSMUSG00000066366, ENSMUSG00000059201, ENSMUSG00000018846, ENSMUSG00000064358, ENSMUSG00000038007	93	1130	19596	1.86469	1	0.551111	0.532172
GOTERM_BP_FAT	GO:0071248~cellular response to metal ion	4	3.84615	0.0832006	ENSMUSG00000024935, ENSMUSG00000049303, ENSMUSG00000006611, ENSMUSG00000000440	93	218	19596	3.86623	1	0.551111	0.532172
GOTERM_BP_FAT	GO:0043281~regulation of cysteine-type endopeptidase activity involved in apoptotic process	4	3.84615	0.0832006	ENSMUSG00000024935, ENSMUSG00000038007, ENSMUSG00000000440, ENSMUSG00000063060	93	218	19596	3.86623	1	0.551111	0.532172
GOTERM_BP_FAT	GO:0008202~steroid metabolic process	5	4.80769	0.0833295	ENSMUSG00000024924, ENSMUSG00000020889, ENSMUSG00000059201, ENSMUSG00000030747, ENSMUSG00000018217	93	351	19596	3.00156	1	0.551111	0.532172
GOTERM_BP_FAT	GO:1904018~positive regulation of vasculature development	4	3.84615	0.0858562	ENSMUSG00000000628, ENSMUSG00000021701, ENSMUSG00000045382, ENSMUSG00000044338	93	221	19596	3.81375	1	0.556662	0.537532
GOTERM_BP_FAT	GO:0061744~motor behavior	2	1.92308	0.0855689	ENSMUSG00000024935, ENSMUSG00000018217	93	19	19596	22.18	1	0.556662	0.537532
GOTERM_BP_FAT	GO:0046888~negative regulation of hormone secretion	3	2.88462	0.0858904	ENSMUSG00000059201, ENSMUSG00000042429, ENSMUSG00000000440	93	104	19596	6.07816	1	0.556662	0.537532
GOTERM_BP_FAT	GO:0042953~lipoprotein transport	2	1.92308	0.0855689	ENSMUSG00000000440, ENSMUSG00000002058	93	19	19596	22.18	1	0.556662	0.537532
GOTERM_BP_FAT	GO:0042594~response to starvation	4	3.84615	0.0858562	ENSMUSG00000026473, ENSMUSG00000010064, ENSMUSG00000006611, ENSMUSG00000000440	93	221	19596	3.81375	1	0.556662	0.537532
GOTERM_BP_FAT	GO:0032092~positive regulation of protein binding	3	2.88462	0.0858904	ENSMUSG00000018169, ENSMUSG00000021701, ENSMUSG00000006611	93	104	19596	6.07816	1	0.556662	0.537532
GOTERM_BP_FAT	GO:0019217~regulation of fatty acid metabolic process	3	2.88462	0.0858904	ENSMUSG00000027533, ENSMUSG00000030747, ENSMUSG00000000440	93	104	19596	6.07816	1	0.556662	0.537532
GOTERM_BP_FAT	GO:0015810~aspartate transport	2	1.92308	0.0855689	ENSMUSG00000024935, ENSMUSG00000054720	93	19	19596	22.18	1	0.556662	0.537532
GOTERM_BP_FAT	GO:0006417~regulation of translation	6	5.76923	0.0846481	ENSMUSG00000069049, ENSMUSG00000020190, ENSMUSG00000039782, ENSMUSG00000073565, ENSMUSG00000055866, ENSMUSG00000000440	93	497	19596	2.54378	1	0.556662	0.537532
GOTERM_BP_FAT	GO:0051270~regulation of cellular component movement	10	9.61538	0.0867288	ENSMUSG00000021701, ENSMUSG00000096768, ENSMUSG00000027750, ENSMUSG00000027111, ENSMUSG00000026473, ENSMUSG00000045382, ENSMUSG00000030249, ENSMUSG00000042429, ENSMUSG00000026833, ENSMUSG00000000440	93	1140	19596	1.84833	1	0.560605	0.541341
GOTERM_BP_FAT	GO:0019693~ribose phosphate metabolic process	6	5.76923	0.0868842	ENSMUSG00000023019, ENSMUSG00000000628, ENSMUSG00000100862, ENSMUSG00000064354, ENSMUSG00000018846, ENSMUSG00000064358	93	501	19596	2.52347	1	0.560605	0.541341
GOTERM_BP_FAT	GO:0050795~regulation of behavior	3	2.88462	0.0872999	ENSMUSG00000020889, ENSMUSG00000042429, ENSMUSG00000028957	93	105	19596	6.02028	1	0.561341	0.542051
GOTERM_BP_FAT	GO:0043270~positive regulation of ion transport	5	4.80769	0.087384	ENSMUSG00000059201, ENSMUSG00000045382, ENSMUSG00000042429, ENSMUSG00000010064, ENSMUSG00000044338	93	357	19596	2.95112	1	0.561341	0.542051
GOTERM_BP_FAT	GO:0050803~regulation of synapse structure or activity	4	3.84615	0.0876467	ENSMUSG00000045776, ENSMUSG00000032452, ENSMUSG00000072235, ENSMUSG00000002341	93	223	19596	3.77955	1	0.561788	0.542483
GOTERM_BP_FAT	GO:0007267~cell-cell signaling	13	12.5	0.0882397	ENSMUSG00000032452, ENSMUSG00000026473, ENSMUSG00000059201, ENSMUSG00000042429, ENSMUSG00000049303, ENSMUSG00000006611, ENSMUSG00000000440, ENSMUSG00000024935, ENSMUSG00000021701, ENSMUSG00000037010, ENSMUSG00000020889, ENSMUSG00000055866, ENSMUSG00000063060	93	1662	19596	1.64815	1	0.564346	0.544953
GOTERM_BP_FAT	GO:0061024~membrane organization	10	9.61538	0.0889133	ENSMUSG00000059811, ENSMUSG00000000628, ENSMUSG00000026672, ENSMUSG00000045382, ENSMUSG00000096255, ENSMUSG00000039956, ENSMUSG00000038217, ENSMUSG00000000440, ENSMUSG00000018217, ENSMUSG00000039735	93	1146	19596	1.83865	1	0.564541	0.545141
GOTERM_BP_FAT	GO:0033273~response to vitamin	3	2.88462	0.0887164	ENSMUSG00000027750, ENSMUSG00000059201, ENSMUSG00000000440	93	106	19596	5.96348	1	0.564541	0.545141
GOTERM_BP_FAT	GO:0032102~negative regulation of response to external stimulus	5	4.80769	0.0887566	ENSMUSG00000021775, ENSMUSG00000020889, ENSMUSG00000059201, ENSMUSG00000042429, ENSMUSG00000000440	93	359	19596	2.93468	1	0.564541	0.545141
GOTERM_BP_FAT	GO:0018130~heterocycle biosynthetic process	27	25.9615	0.0890462	ENSMUSG00000035877, ENSMUSG00000030087, ENSMUSG00000056313, ENSMUSG00000027111, ENSMUSG00000059201, ENSMUSG00000006611, ENSMUSG00000049327, ENSMUSG00000022389, ENSMUSG00000021775, ENSMUSG00000003949, ENSMUSG00000037010, ENSMUSG00000064354, ENSMUSG00000020889, ENSMUSG00000055866, ENSMUSG00000063060, ENSMUSG00000059824, ENSMUSG00000031442, ENSMUSG00000003038, ENSMUSG00000020593, ENSMUSG00000028957,…	93	4283	19596	1.32831	1	0.564541	0.545141
GOTERM_BP_FAT	GO:0060333~interferon-gamma-mediated signaling pathway	2	1.92308	0.0898661	ENSMUSG00000051596, ENSMUSG00000000440	93	20	19596	21.071	1	0.56604	0.546588
GOTERM_BP_FAT	GO:0050965~detection of temperature stimulus involved in sensory perception of pain	2	1.92308	0.0898661	ENSMUSG00000045382, ENSMUSG00000042429	93	20	19596	21.071	1	0.56604	0.546588
GOTERM_BP_FAT	GO:0044872~lipoprotein localization	2	1.92308	0.0898661	ENSMUSG00000000440, ENSMUSG00000002058	93	20	19596	21.071	1	0.56604	0.546588
GOTERM_BP_FAT	GO:0022900~electron transport chain	3	2.88462	0.0901398	ENSMUSG00000023019, ENSMUSG00000064354, ENSMUSG00000064358	93	107	19596	5.90775	1	0.566537	0.547069
GOTERM_BP_FAT	GO:0006518~peptide metabolic process	9	8.65385	0.090471	ENSMUSG00000064372, ENSMUSG00000069049, ENSMUSG00000024935, ENSMUSG00000039782, ENSMUSG00000073565, ENSMUSG00000026833, ENSMUSG00000055866, ENSMUSG00000000440, ENSMUSG00000064339	93	983	19596	1.92918	1	0.567393	0.547895
GOTERM_BP_FAT	GO:1903321~negative regulation of protein modification by small protein conjugation or removal	3	2.88462	0.09157	ENSMUSG00000028410, ENSMUSG00000006611, ENSMUSG00000055866	93	108	19596	5.85305	1	0.567394	0.547896
GOTERM_BP_FAT	GO:0070201~regulation of establishment of protein localization	7	6.73077	0.0906825	ENSMUSG00000024935, ENSMUSG00000028410, ENSMUSG00000026473, ENSMUSG00000020889, ENSMUSG00000059201, ENSMUSG00000055866, ENSMUSG00000000440	93	661	19596	2.23142	1	0.567394	0.547896
GOTERM_BP_FAT	GO:0050866~negative regulation of cell activation	4	3.84615	0.091275	ENSMUSG00000020889, ENSMUSG00000023915, ENSMUSG00000006611, ENSMUSG00000000440	93	227	19596	3.71295	1	0.567394	0.547896
GOTERM_BP_FAT	GO:0045862~positive regulation of proteolysis	5	4.80769	0.0915333	ENSMUSG00000024935, ENSMUSG00000021701, ENSMUSG00000038007, ENSMUSG00000000440, ENSMUSG00000063060	93	363	19596	2.90234	1	0.567394	0.547896
GOTERM_BP_FAT	GO:0019438~aromatic compound biosynthetic process	27	25.9615	0.0916409	ENSMUSG00000035877, ENSMUSG00000030087, ENSMUSG00000056313, ENSMUSG00000027111, ENSMUSG00000059201, ENSMUSG00000006611, ENSMUSG00000049327, ENSMUSG00000022389, ENSMUSG00000021775, ENSMUSG00000003949, ENSMUSG00000037010, ENSMUSG00000064354, ENSMUSG00000020889, ENSMUSG00000055866, ENSMUSG00000063060, ENSMUSG00000059824, ENSMUSG00000031442, ENSMUSG00000003038, ENSMUSG00000020593, ENSMUSG00000028957,…	93	4296	19596	1.32429	1	0.567394	0.547896
GOTERM_BP_FAT	GO:0015908~fatty acid transport	3	2.88462	0.09157	ENSMUSG00000059201, ENSMUSG00000027533, ENSMUSG00000000440	93	108	19596	5.85305	1	0.567394	0.547896
GOTERM_BP_FAT	GO:0030334~regulation of cell migration	9	8.65385	0.092496	ENSMUSG00000021701, ENSMUSG00000096768, ENSMUSG00000027750, ENSMUSG00000027111, ENSMUSG00000026473, ENSMUSG00000045382, ENSMUSG00000042429, ENSMUSG00000026833, ENSMUSG00000000440	93	988	19596	1.91942	1	0.571472	0.551834
GOTERM_BP_FAT	GO:0031345~negative regulation of cell projection organization	4	3.84615	0.0931125	ENSMUSG00000057315, ENSMUSG00000021701, ENSMUSG00000032911, ENSMUSG00000018217	93	229	19596	3.68052	1	0.572849	0.553163
GOTERM_BP_FAT	GO:0006090~pyruvate metabolic process	3	2.88462	0.0930069	ENSMUSG00000023019, ENSMUSG00000000628, ENSMUSG00000030246	93	109	19596	5.79935	1	0.572849	0.553163
GOTERM_BP_FAT	GO:0098780~response to mitochondrial depolarisation	2	1.92308	0.0941434	ENSMUSG00000000628, ENSMUSG00000026672	93	21	19596	20.0676	1	0.572913	0.553225
GOTERM_BP_FAT	GO:0071243~cellular response to arsenic-containing substance	2	1.92308	0.0941434	ENSMUSG00000020190, ENSMUSG00000039782	93	21	19596	20.0676	1	0.572913	0.553225
GOTERM_BP_FAT	GO:0050746~regulation of lipoprotein metabolic process	2	1.92308	0.0941434	ENSMUSG00000059201, ENSMUSG00000030747	93	21	19596	20.0676	1	0.572913	0.553225
GOTERM_BP_FAT	GO:0040011~locomotion	15	14.4231	0.0942333	ENSMUSG00000057315, ENSMUSG00000028410, ENSMUSG00000027750, ENSMUSG00000027111, ENSMUSG00000026473, ENSMUSG00000059201, ENSMUSG00000042429, ENSMUSG00000026833, ENSMUSG00000000440, ENSMUSG00000045776, ENSMUSG00000021701, ENSMUSG00000096768, ENSMUSG00000045382, ENSMUSG00000032911, ENSMUSG00000018217	93	2040	19596	1.54934	1	0.572913	0.553225
GOTERM_BP_FAT	GO:0031327~negative regulation of cellular biosynthetic process	14	13.4615	0.0943042	ENSMUSG00000035877, ENSMUSG00000059201, ENSMUSG00000003038, ENSMUSG00000020593, ENSMUSG00000028957, ENSMUSG00000049327, ENSMUSG00000000440, ENSMUSG00000021775, ENSMUSG00000066687, ENSMUSG00000020889, ENSMUSG00000039782, ENSMUSG00000038007, ENSMUSG00000055866, ENSMUSG00000063060	93	1860	19596	1.58599	1	0.572913	0.553225
GOTERM_BP_FAT	GO:0006089~lactate metabolic process	2	1.92308	0.0941434	ENSMUSG00000055866, ENSMUSG00000030246	93	21	19596	20.0676	1	0.572913	0.553225
GOTERM_BP_FAT	GO:0006812~cation transport	10	9.61538	0.0948999	ENSMUSG00000024935, ENSMUSG00000100862, ENSMUSG00000059201, ENSMUSG00000045382, ENSMUSG00000030249, ENSMUSG00000042429, ENSMUSG00000010064, ENSMUSG00000051596, ENSMUSG00000006611, ENSMUSG00000044338	93	1162	19596	1.81334	1	0.57533	0.55556
GOTERM_BP_FAT	GO:1901699~cellular response to nitrogen compound	8	7.69231	0.0965557	ENSMUSG00000023019, ENSMUSG00000024935, ENSMUSG00000030087, ENSMUSG00000039782, ENSMUSG00000059201, ENSMUSG00000051596, ENSMUSG00000020593, ENSMUSG00000000440	93	833	19596	2.02362	1	0.584152	0.564078
GOTERM_BP_FAT	GO:0051253~negative regulation of RNA metabolic process	12	11.5385	0.0985437	ENSMUSG00000021775, ENSMUSG00000035877, ENSMUSG00000066687, ENSMUSG00000020889, ENSMUSG00000059201, ENSMUSG00000003038, ENSMUSG00000020593, ENSMUSG00000028957, ENSMUSG00000049327, ENSMUSG00000055866, ENSMUSG00000000440, ENSMUSG00000063060	93	1518	19596	1.66569	1	0.591262	0.570944
GOTERM_BP_FAT	GO:0050961~detection of temperature stimulus involved in sensory perception	2	1.92308	0.0984008	ENSMUSG00000045382, ENSMUSG00000042429	93	22	19596	19.1554	1	0.591262	0.570944
GOTERM_BP_FAT	GO:0006351~transcription, DNA-templated	23	22.1154	0.0981619	ENSMUSG00000031442, ENSMUSG00000035877, ENSMUSG00000030087, ENSMUSG00000056313, ENSMUSG00000027111, ENSMUSG00000059201, ENSMUSG00000003038, ENSMUSG00000020593, ENSMUSG00000028957, ENSMUSG00000006611, ENSMUSG00000049327, ENSMUSG00000000440, ENSMUSG00000022389, ENSMUSG00000021775, ENSMUSG00000003949, ENSMUSG00000066687, ENSMUSG00000037010, ENSMUSG00000020889, ENSMUSG00000038375, ENSMUSG00000010064,…	93	3552	19596	1.36439	1	0.591262	0.570944
GOTERM_BP_FAT	GO:0006071~glycerol metabolic process	2	1.92308	0.0984008	ENSMUSG00000059201, ENSMUSG00000030747	93	22	19596	19.1554	1	0.591262	0.570944
GOTERM_CC_FAT	GO:0043209~myelin sheath	7	6.73077	0.00082456	ENSMUSG00000032279, ENSMUSG00000029059, ENSMUSG00000072235, ENSMUSG00000026473, ENSMUSG00000027669, ENSMUSG00000018217, ENSMUSG00000030246	85	215	16391	6.27836	0.217292	0.244894	0.244894
GOTERM_CC_FAT	GO:1990204~oxidoreductase complex	4	3.84615	0.0227269	ENSMUSG00000023019, ENSMUSG00000032279, ENSMUSG00000031924, ENSMUSG00000030246	85	118	16391	6.53679	0.998917	1	1
GOTERM_CC_FAT	GO:0098802~plasma membrane receptor complex	4	3.84615	0.0852684	ENSMUSG00000027111, ENSMUSG00000006611, ENSMUSG00000026833, ENSMUSG00000018217	85	202	16391	3.81852	1	1	1
GOTERM_CC_FAT	GO:0098798~mitochondrial protein complex	4	3.84615	0.0608957	ENSMUSG00000032279, ENSMUSG00000100862, ENSMUSG00000064354, ENSMUSG00000064358	85	175	16391	4.40766	1	1	1
GOTERM_CC_FAT	GO:0055037~recycling endosome	5	4.80769	0.0185207	ENSMUSG00000024935, ENSMUSG00000026672, ENSMUSG00000072235, ENSMUSG00000028557, ENSMUSG00000006611	85	197	16391	4.8943	0.996121	1	1
GOTERM_CC_FAT	GO:0048471~perinuclear region of cytoplasm	10	9.61538	0.0274137	ENSMUSG00000024924, ENSMUSG00000026672, ENSMUSG00000028410, ENSMUSG00000037010, ENSMUSG00000030747, ENSMUSG00000006611, ENSMUSG00000055866, ENSMUSG00000042249, ENSMUSG00000000440, ENSMUSG00000018217	85	838	16391	2.30114	0.99974	1	1
GOTERM_CC_FAT	GO:0045202~synapse	14	13.4615	0.0592199	ENSMUSG00000032452, ENSMUSG00000027750, ENSMUSG00000026473, ENSMUSG00000027533, ENSMUSG00000042429, ENSMUSG00000049303, ENSMUSG00000002341, ENSMUSG00000026833, ENSMUSG00000042249, ENSMUSG00000024935, ENSMUSG00000072235, ENSMUSG00000020889, ENSMUSG00000016382, ENSMUSG00000039782	85	1584	16391	1.70435	1	1	1
GOTERM_CC_FAT	GO:0044297~cell body	9	8.65385	0.082823	ENSMUSG00000030683, ENSMUSG00000024935, ENSMUSG00000026672, ENSMUSG00000026473, ENSMUSG00000020889, ENSMUSG00000096255, ENSMUSG00000042429, ENSMUSG00000026833, ENSMUSG00000027669	85	884	16391	1.96326	1	1	1
GOTERM_CC_FAT	GO:0043235~receptor complex	6	5.76923	0.07651	ENSMUSG00000024924, ENSMUSG00000027111, ENSMUSG00000006611, ENSMUSG00000026833, ENSMUSG00000000440, ENSMUSG00000018217	85	442	16391	2.61767	1	1	1
GOTERM_CC_FAT	GO:0043005~neuron projection	13	12.5	0.099015	ENSMUSG00000032452, ENSMUSG00000026672, ENSMUSG00000026473, ENSMUSG00000096255, ENSMUSG00000042429, ENSMUSG00000026833, ENSMUSG00000042249, ENSMUSG00000024935, ENSMUSG00000021701, ENSMUSG00000020889, ENSMUSG00000039782, ENSMUSG00000023915, ENSMUSG00000045382	85	1557	16391	1.61006	1	1	1
GOTERM_CC_FAT	GO:0042587~glycogen granule	2	1.92308	0.0402787	ENSMUSG00000067279, ENSMUSG00000049999	85	8	16391	48.2088	0.999995	1	1
GOTERM_CC_FAT	GO:0036477~somatodendritic compartment	11	10.5769	0.0711901	ENSMUSG00000030683, ENSMUSG00000024935, ENSMUSG00000032452, ENSMUSG00000021701, ENSMUSG00000026672, ENSMUSG00000026473, ENSMUSG00000020889, ENSMUSG00000096255, ENSMUSG00000042429, ENSMUSG00000026833, ENSMUSG00000042249	85	1157	16391	1.83335	1	1	1
GOTERM_CC_FAT	GO:0031594~neuromuscular junction	3	2.88462	0.0931601	ENSMUSG00000027750, ENSMUSG00000072235, ENSMUSG00000016382	85	100	16391	5.78506	1	1	1
GOTERM_CC_FAT	GO:0016605~PML body	3	2.88462	0.0995146	ENSMUSG00000020190, ENSMUSG00000066687, ENSMUSG00000038375	85	104	16391	5.56256	1	1	1
GOTERM_CC_FAT	GO:0005783~endoplasmic reticulum	17	16.3462	0.0289697	ENSMUSG00000059811, ENSMUSG00000030683, ENSMUSG00000029059, ENSMUSG00000032452, ENSMUSG00000028410, ENSMUSG00000026473, ENSMUSG00000042429, ENSMUSG00000020593, ENSMUSG00000026833, ENSMUSG00000024935, ENSMUSG00000000628, ENSMUSG00000066366, ENSMUSG00000030747, ENSMUSG00000035376, ENSMUSG00000039956, ENSMUSG00000054720, ENSMUSG00000032401	85	1888	16391	1.73633	0.999839	1	1
GOTERM_CC_FAT	GO:0005751~mitochondrial respiratory chain complex IV	2	1.92308	0.0977093	ENSMUSG00000064354, ENSMUSG00000064358	85	20	16391	19.2835	1	1	1
GOTERM_CC_FAT	GO:0005739~mitochondrion	16	15.3846	0.07383	ENSMUSG00000032279, ENSMUSG00000033488, ENSMUSG00000028410, ENSMUSG00000026473, ENSMUSG00000064358, ENSMUSG00000020593, ENSMUSG00000064339, ENSMUSG00000064372, ENSMUSG00000023019, ENSMUSG00000000628, ENSMUSG00000064354, ENSMUSG00000100862, ENSMUSG00000030747, ENSMUSG00000031924, ENSMUSG00000030249, ENSMUSG00000030246	85	1967	16391	1.56856	1	1	1
GOTERM_CC_FAT	GO:0000164~protein phosphatase type 1 complex	2	1.92308	0.0694317	ENSMUSG00000067279, ENSMUSG00000049999	85	14	16391	27.5479	1	1	1
GOTERM_MF_FAT	GO:0042802~identical protein binding	24	23.0769	0.00184615	ENSMUSG00000059811, ENSMUSG00000035877, ENSMUSG00000026672, ENSMUSG00000026473, ENSMUSG00000027533, ENSMUSG00000096255, ENSMUSG00000026833, ENSMUSG00000000440, ENSMUSG00000022389, ENSMUSG00000024747, ENSMUSG00000023019, ENSMUSG00000024935, ENSMUSG00000066687, ENSMUSG00000072235, ENSMUSG00000037010, ENSMUSG00000066366, ENSMUSG00000053907, ENSMUSG00000018846, ENSMUSG00000045382, ENSMUSG00000030747,…	90	2451	17736	1.92966	0.600098	0.500695	0.500695
GOTERM_MF_FAT	GO:0001222~transcription corepressor binding	4	3.84615	0.00201893	ENSMUSG00000066687, ENSMUSG00000020889, ENSMUSG00000028957, ENSMUSG00000055866	90	50	17736	15.7653	0.633003	0.500695	0.500695
GOTERM_MF_FAT	GO:0001221~transcription cofactor binding	5	4.80769	0.00416183	ENSMUSG00000066687, ENSMUSG00000020889, ENSMUSG00000028957, ENSMUSG00000055866, ENSMUSG00000000440	90	130	17736	7.57949	0.873634	0.688089	0.688089
GOTERM_MF_FAT	GO:2001069~glycogen binding	2	1.92308	0.0442762	ENSMUSG00000067279, ENSMUSG00000049999	90	9	17736	43.7926	1	1	1
GOTERM_MF_FAT	GO:0098531~transcription factor activity, direct ligand regulated sequence-specific DNA binding	3	2.88462	0.0300989	ENSMUSG00000021775, ENSMUSG00000020889, ENSMUSG00000000440	90	54	17736	10.9481	1	1	1
GOTERM_MF_FAT	GO:0051427~hormone receptor binding	4	3.84615	0.0587603	ENSMUSG00000056673, ENSMUSG00000059201, ENSMUSG00000055866, ENSMUSG00000000440	90	176	17736	4.47879	1	1	1
GOTERM_MF_FAT	GO:0051287~NAD binding	3	2.88462	0.04703	ENSMUSG00000023019, ENSMUSG00000032279, ENSMUSG00000030246	90	69	17736	8.56812	1	1	1
GOTERM_MF_FAT	GO:0043177~organic acid binding	5	4.80769	0.036209	ENSMUSG00000024935, ENSMUSG00000026473, ENSMUSG00000053907, ENSMUSG00000027533, ENSMUSG00000000440	90	248	17736	3.97312	1	1	1
GOTERM_MF_FAT	GO:0036094~small molecule binding	21	20.1923	0.0405739	ENSMUSG00000059811, ENSMUSG00000032279, ENSMUSG00000020190, ENSMUSG00000028410, ENSMUSG00000026473, ENSMUSG00000027533, ENSMUSG00000042429, ENSMUSG00000041696, ENSMUSG00000042249, ENSMUSG00000000440, ENSMUSG00000023019, ENSMUSG00000069049, ENSMUSG00000024935, ENSMUSG00000000628, ENSMUSG00000021701, ENSMUSG00000072235, ENSMUSG00000053907, ENSMUSG00000018846, ENSMUSG00000045382, ENSMUSG00000030249,…	90	2674	17736	1.54764	1	1	1
GOTERM_MF_FAT	GO:0031406~carboxylic acid binding	5	4.80769	0.0301896	ENSMUSG00000024935, ENSMUSG00000026473, ENSMUSG00000053907, ENSMUSG00000027533, ENSMUSG00000000440	90	234	17736	4.21083	1	1	1
GOTERM_MF_FAT	GO:0030246~carbohydrate binding	5	4.80769	0.068039	ENSMUSG00000000628, ENSMUSG00000054690, ENSMUSG00000067279, ENSMUSG00000002341, ENSMUSG00000049999	90	306	17736	3.22004	1	1	1
GOTERM_MF_FAT	GO:0022804~active transmembrane transporter activity	6	5.76923	0.0392507	ENSMUSG00000024935, ENSMUSG00000100862, ENSMUSG00000064358, ENSMUSG00000030249, ENSMUSG00000010064, ENSMUSG00000009378	90	372	17736	3.17849	1	1	1
GOTERM_MF_FAT	GO:0016616~oxidoreductase activity, acting on the CH-OH group of donors, NAD or NADP as acceptor	4	3.84615	0.0444974	ENSMUSG00000023019, ENSMUSG00000032279, ENSMUSG00000029059, ENSMUSG00000030246	90	157	17736	5.02081	1	1	1
GOTERM_MF_FAT	GO:0016614~oxidoreductase activity, acting on CH-OH group of donors	4	3.84615	0.0532798	ENSMUSG00000023019, ENSMUSG00000032279, ENSMUSG00000029059, ENSMUSG00000030246	90	169	17736	4.6643	1	1	1
GOTERM_MF_FAT	GO:0016597~amino acid binding	3	2.88462	0.0625159	ENSMUSG00000024935, ENSMUSG00000026473, ENSMUSG00000053907	90	81	17736	7.29877	1	1	1
GOTERM_MF_FAT	GO:0016595~glutamate binding	2	1.92308	0.0680306	ENSMUSG00000024935, ENSMUSG00000026473	90	14	17736	28.1524	1	1	1
GOTERM_MF_FAT	GO:0015171~amino acid transmembrane transporter activity	3	2.88462	0.0708211	ENSMUSG00000024935, ENSMUSG00000010064, ENSMUSG00000009378	90	87	17736	6.7954	1	1	1
GOTERM_MF_FAT	GO:0015078~hydrogen ion transmembrane transporter activity	3	2.88462	0.0929994	ENSMUSG00000100862, ENSMUSG00000064354, ENSMUSG00000064358	90	102	17736	5.79608	1	1	1
GOTERM_MF_FAT	GO:0015077~monovalent inorganic cation transmembrane transporter activity	5	4.80769	0.0909763	ENSMUSG00000024935, ENSMUSG00000100862, ENSMUSG00000064354, ENSMUSG00000064358, ENSMUSG00000030249	90	339	17736	2.90659	1	1	1
GOTERM_MF_FAT	GO:0009055~electron carrier activity	3	2.88462	0.0321842	ENSMUSG00000064354, ENSMUSG00000064358, ENSMUSG00000031924	90	56	17736	10.5571	1	1	1
GOTERM_MF_FAT	GO:0008324~cation transmembrane transporter activity	7	6.73077	0.0995861	ENSMUSG00000024935, ENSMUSG00000100862, ENSMUSG00000064354, ENSMUSG00000064358, ENSMUSG00000030249, ENSMUSG00000010064, ENSMUSG00000051596	90	635	17736	2.17239	1	1	1
GOTERM_MF_FAT	GO:0008134~transcription factor binding	8	7.69231	0.0518822	ENSMUSG00000026672, ENSMUSG00000066687, ENSMUSG00000028410, ENSMUSG00000020889, ENSMUSG00000020593, ENSMUSG00000028957, ENSMUSG00000055866, ENSMUSG00000000440	90	672	17736	2.34603	1	1	1
GOTERM_MF_FAT	GO:0004879~RNA polymerase II transcription factor activity, ligand-activated sequence-specific DNA binding	3	2.88462	0.0300989	ENSMUSG00000021775, ENSMUSG00000020889, ENSMUSG00000000440	90	54	17736	10.9481	1	1	1
GOTERM_MF_FAT	GO:0003924~GTPase activity	5	4.80769	0.0673972	ENSMUSG00000059811, ENSMUSG00000069049, ENSMUSG00000072235, ENSMUSG00000041696, ENSMUSG00000027669	90	305	17736	3.2306	1	1	1
GOTERM_MF_FAT	GO:0001664~G-protein coupled receptor binding	5	4.80769	0.0794345	ENSMUSG00000028410, ENSMUSG00000037010, ENSMUSG00000042429, ENSMUSG00000039956, ENSMUSG00000042249	90	323	17736	3.05057	1	1	1
KEGG_PATHWAY	mmu04724:Glutamatergic synapse	5	4.80769	0.00410677	ENSMUSG00000024935, ENSMUSG00000026473, ENSMUSG00000010064, ENSMUSG00000027669, ENSMUSG00000042249	53	113	8941	7.46452	0.426247	0.558521	0.558521
KEGG_PATHWAY	mmu04710:Circadian rhythm	3	2.88462	0.0130061	ENSMUSG00000020889, ENSMUSG00000028957, ENSMUSG00000055866	53	30	8941	16.8698	0.829214	0.884416	0.884416
KEGG_PATHWAY	mmu05032:Morphine addiction	3	2.88462	0.0980035	ENSMUSG00000042429, ENSMUSG00000027669, ENSMUSG00000042249	53	91	8941	5.56148	0.999999	1	1
KEGG_PATHWAY	mmu04932:Non-alcoholic fatty liver disease	4	3.84615	0.0619221	ENSMUSG00000064354, ENSMUSG00000059201, ENSMUSG00000064358, ENSMUSG00000000440	53	156	8941	4.32559	0.999821	1	1
KEGG_PATHWAY	mmu04910:Insulin signaling pathway	4	3.84615	0.0467704	ENSMUSG00000000628, ENSMUSG00000020190, ENSMUSG00000067279, ENSMUSG00000049999	53	139	8941	4.85462	0.998445	1	1
KEGG_PATHWAY	mmu04727:GABAergic synapse	3	2.88462	0.0943973	ENSMUSG00000026473, ENSMUSG00000010064, ENSMUSG00000027669	53	89	8941	5.68645	0.999998	1	1
KEGG_PATHWAY	mmu01230:Biosynthesis of amino acids	3	2.88462	0.0770012	ENSMUSG00000032279, ENSMUSG00000026473, ENSMUSG00000053907	53	79	8941	6.40626	0.99998	1	1
KEGG_PATHWAY	mmu01100:Metabolic pathways	15	14.4231	0.0717752	ENSMUSG00000032279, ENSMUSG00000029059, ENSMUSG00000026473, ENSMUSG00000064358, ENSMUSG00000020593, ENSMUSG00000049327, ENSMUSG00000024747, ENSMUSG00000000628, ENSMUSG00000064354, ENSMUSG00000053907, ENSMUSG00000018846, ENSMUSG00000030747, ENSMUSG00000035376, ENSMUSG00000038007, ENSMUSG00000030246	53	1609	8941	1.5727	0.999957	1	1

## Sheet: DEGs down (OV vs CV)
Category	Term	Count	%	PValue	Genes	List Total	Pop Hits	Pop Total	Fold Enrichment	Bonferroni	Benjamini	FDR
GOTERM_BP_FAT	GO:0071310~cellular response to organic substance	73	34.9282	1.26241e-14	ENSMUSG00000032089, ENSMUSG00000031870, ENSMUSG00000031075, ENSMUSG00000017969, ENSMUSG00000054072, ENSMUSG00000040026, ENSMUSG00000022840, ENSMUSG00000024621, ENSMUSG00000015340, ENSMUSG00000044786, ENSMUSG00000020027, ENSMUSG00000047414, ENSMUSG00000040264, ENSMUSG00000030748, ENSMUSG00000032726, ENSMUSG00000037379, ENSMUSG00000078920, ENSMUSG00000039910, ENSMUSG00000034612, ENSMUSG00000029860,…	199	2834	19596	2.53651	5.92073e-11	4.16021e-11	3.80174e-11
GOTERM_BP_FAT	GO:0006952~defense response	59	28.2297	1.77901e-14	ENSMUSG00000017969, ENSMUSG00000033450, ENSMUSG00000054072, ENSMUSG00000046805, ENSMUSG00000040026, ENSMUSG00000024621, ENSMUSG00000021356, ENSMUSG00000015340, ENSMUSG00000044786, ENSMUSG00000040264, ENSMUSG00000030748, ENSMUSG00000037379, ENSMUSG00000078920, ENSMUSG00000036887, ENSMUSG00000029860, ENSMUSG00000031980, ENSMUSG00000026077, ENSMUSG00000048087, ENSMUSG00000006205, ENSMUSG00000024610,…	199	1950	19596	2.97942	8.3098e-11	4.16021e-11	3.80174e-11
GOTERM_BP_FAT	GO:0051240~positive regulation of multicellular organismal process	60	28.7081	5.15622e-14	ENSMUSG00000054675, ENSMUSG00000017969, ENSMUSG00000024621, ENSMUSG00000021356, ENSMUSG00000015340, ENSMUSG00000020027, ENSMUSG00000047414, ENSMUSG00000030748, ENSMUSG00000020704, ENSMUSG00000037379, ENSMUSG00000052934, ENSMUSG00000039910, ENSMUSG00000031980, ENSMUSG00000026077, ENSMUSG00000055254, ENSMUSG00000033161, ENSMUSG00000025789, ENSMUSG00000024610, ENSMUSG00000002602, ENSMUSG00000036594,…	199	2060	19596	2.86813	2.40984e-10	8.03855e-11	7.3459e-11
GOTERM_BP_FAT	GO:0045087~innate immune response	42	20.0957	3.41083e-13	ENSMUSG00000073491, ENSMUSG00000032661, ENSMUSG00000036905, ENSMUSG00000046805, ENSMUSG00000054072, ENSMUSG00000023992, ENSMUSG00000066677, ENSMUSG00000002897, ENSMUSG00000022346, ENSMUSG00000027514, ENSMUSG00000025017, ENSMUSG00000021356, ENSMUSG00000024621, ENSMUSG00000015340, ENSMUSG00000073418, ENSMUSG00000040264, ENSMUSG00000001128, ENSMUSG00000035692, ENSMUSG00000037379, ENSMUSG00000036887,…	199	1110	19596	3.72598	1.59548e-09	3.98812e-10	3.64448e-10
GOTERM_BP_FAT	GO:0051094~positive regulation of developmental process	51	24.4019	1.72398e-12	ENSMUSG00000054675, ENSMUSG00000017969, ENSMUSG00000024621, ENSMUSG00000015340, ENSMUSG00000044786, ENSMUSG00000020027, ENSMUSG00000047414, ENSMUSG00000030748, ENSMUSG00000020704, ENSMUSG00000052934, ENSMUSG00000039910, ENSMUSG00000031980, ENSMUSG00000055254, ENSMUSG00000027004, ENSMUSG00000025789, ENSMUSG00000024610, ENSMUSG00000002602, ENSMUSG00000036594, ENSMUSG00000037440, ENSMUSG00000030854,…	199	1675	19596	2.99826	8.06466e-09	1.61261e-09	1.47366e-09
GOTERM_BP_FAT	GO:0070887~cellular response to chemical stimulus	78	37.3206	2.06925e-12	ENSMUSG00000032089, ENSMUSG00000031870, ENSMUSG00000031075, ENSMUSG00000017969, ENSMUSG00000054072, ENSMUSG00000040026, ENSMUSG00000022840, ENSMUSG00000024621, ENSMUSG00000015340, ENSMUSG00000044786, ENSMUSG00000020027, ENSMUSG00000047414, ENSMUSG00000040264, ENSMUSG00000030748, ENSMUSG00000020704, ENSMUSG00000032726, ENSMUSG00000037379, ENSMUSG00000078920, ENSMUSG00000039910, ENSMUSG00000034612,…	199	3498	19596	2.19578	9.67988e-09	1.61298e-09	1.47399e-09
GOTERM_BP_FAT	GO:0010033~response to organic substance	83	39.7129	2.45312e-12	ENSMUSG00000030222, ENSMUSG00000032089, ENSMUSG00000031870, ENSMUSG00000031075, ENSMUSG00000017969, ENSMUSG00000054072, ENSMUSG00000040026, ENSMUSG00000022840, ENSMUSG00000024621, ENSMUSG00000015340, ENSMUSG00000044786, ENSMUSG00000020027, ENSMUSG00000047414, ENSMUSG00000040264, ENSMUSG00000030748, ENSMUSG00000032726, ENSMUSG00000037379, ENSMUSG00000078920, ENSMUSG00000037138, ENSMUSG00000039910,…	199	3886	19596	2.10324	1.14758e-08	1.63904e-09	1.49781e-09
GOTERM_BP_FAT	GO:0006955~immune response	57	27.2727	3.85283e-12	ENSMUSG00000054072, ENSMUSG00000046805, ENSMUSG00000004730, ENSMUSG00000024621, ENSMUSG00000021356, ENSMUSG00000015340, ENSMUSG00000040264, ENSMUSG00000030748, ENSMUSG00000037379, ENSMUSG00000036887, ENSMUSG00000029860, ENSMUSG00000048087, ENSMUSG00000024610, ENSMUSG00000070034, ENSMUSG00000002602, ENSMUSG00000036594, ENSMUSG00000037440, ENSMUSG00000037321, ENSMUSG00000073421, ENSMUSG00000105096,…	199	2084	19596	2.69334	1.80234e-08	2.25246e-09	2.05837e-09
GOTERM_BP_FAT	GO:0034097~response to cytokine	41	19.6172	1.23547e-11	ENSMUSG00000073491, ENSMUSG00000049382, ENSMUSG00000031451, ENSMUSG00000032661, ENSMUSG00000032089, ENSMUSG00000017969, ENSMUSG00000021250, ENSMUSG00000058297, ENSMUSG00000054072, ENSMUSG00000023992, ENSMUSG00000066677, ENSMUSG00000002897, ENSMUSG00000022346, ENSMUSG00000027514, ENSMUSG00000040026, ENSMUSG00000024621, ENSMUSG00000044786, ENSMUSG00000040264, ENSMUSG00000030748, ENSMUSG00000035692,…	199	1187	19596	3.40132	5.77952e-08	6.4203e-09	5.86709e-09
GOTERM_BP_FAT	GO:0048584~positive regulation of response to stimulus	63	30.1435	5.35781e-11	ENSMUSG00000032089, ENSMUSG00000031075, ENSMUSG00000017969, ENSMUSG00000024621, ENSMUSG00000021356, ENSMUSG00000030748, ENSMUSG00000032726, ENSMUSG00000037379, ENSMUSG00000039910, ENSMUSG00000019787, ENSMUSG00000036887, ENSMUSG00000031980, ENSMUSG00000026077, ENSMUSG00000055254, ENSMUSG00000023046, ENSMUSG00000027322, ENSMUSG00000024610, ENSMUSG00000020733, ENSMUSG00000002602, ENSMUSG00000073421,…	199	2634	19596	2.35526	2.50639e-07	2.50585e-08	2.28993e-08
GOTERM_BP_FAT	GO:0002682~regulation of immune system process	48	22.9665	2.052e-10	ENSMUSG00000073491, ENSMUSG00000031451, ENSMUSG00000032661, ENSMUSG00000036905, ENSMUSG00000052397, ENSMUSG00000086962, ENSMUSG00000021250, ENSMUSG00000023992, ENSMUSG00000066677, ENSMUSG00000022346, ENSMUSG00000027514, ENSMUSG00000025017, ENSMUSG00000021356, ENSMUSG00000024621, ENSMUSG00000044786, ENSMUSG00000073418, ENSMUSG00000001128, ENSMUSG00000030748, ENSMUSG00000035692, ENSMUSG00000037379,…	199	1722	19596	2.74487	9.59923e-07	8.72471e-08	7.97293e-08
GOTERM_BP_FAT	GO:0002684~positive regulation of immune system process	40	19.1388	3.78857e-10	ENSMUSG00000073491, ENSMUSG00000031451, ENSMUSG00000032661, ENSMUSG00000036905, ENSMUSG00000052397, ENSMUSG00000086962, ENSMUSG00000021250, ENSMUSG00000023992, ENSMUSG00000066677, ENSMUSG00000027514, ENSMUSG00000025017, ENSMUSG00000021356, ENSMUSG00000024621, ENSMUSG00000073418, ENSMUSG00000001128, ENSMUSG00000030748, ENSMUSG00000035692, ENSMUSG00000037379, ENSMUSG00000036887, ENSMUSG00000078853,…	199	1272	19596	3.09662	1.77229e-06	1.4766e-07	1.34936e-07
GOTERM_BP_FAT	GO:0009605~response to external stimulus	66	31.5789	1.52622e-09	ENSMUSG00000032089, ENSMUSG00000031075, ENSMUSG00000017969, ENSMUSG00000033450, ENSMUSG00000054072, ENSMUSG00000046805, ENSMUSG00000040026, ENSMUSG00000024621, ENSMUSG00000021356, ENSMUSG00000015340, ENSMUSG00000044786, ENSMUSG00000047414, ENSMUSG00000040264, ENSMUSG00000030748, ENSMUSG00000020704, ENSMUSG00000032726, ENSMUSG00000037379, ENSMUSG00000039910, ENSMUSG00000019787, ENSMUSG00000029860,…	199	3077	19596	2.11218	7.13963e-06	5.49087e-07	5.01774e-07
GOTERM_BP_FAT	GO:0071345~cellular response to cytokine stimulus	35	16.7464	1.91725e-09	ENSMUSG00000073491, ENSMUSG00000049382, ENSMUSG00000031451, ENSMUSG00000032661, ENSMUSG00000032089, ENSMUSG00000017969, ENSMUSG00000058297, ENSMUSG00000054072, ENSMUSG00000023992, ENSMUSG00000066677, ENSMUSG00000002897, ENSMUSG00000022346, ENSMUSG00000027514, ENSMUSG00000040026, ENSMUSG00000024621, ENSMUSG00000044786, ENSMUSG00000040264, ENSMUSG00000030748, ENSMUSG00000035692, ENSMUSG00000078920,…	199	1059	19596	3.25452	8.96885e-06	6.40498e-07	5.85309e-07
GOTERM_BP_FAT	GO:0031347~regulation of defense response	29	13.8756	3.94241e-09	ENSMUSG00000073491, ENSMUSG00000032661, ENSMUSG00000017969, ENSMUSG00000023992, ENSMUSG00000066677, ENSMUSG00000002897, ENSMUSG00000027514, ENSMUSG00000025017, ENSMUSG00000021356, ENSMUSG00000044786, ENSMUSG00000035692, ENSMUSG00000038642, ENSMUSG00000029860, ENSMUSG00000031980, ENSMUSG00000026077, ENSMUSG00000078853, ENSMUSG00000006205, ENSMUSG00000041202, ENSMUSG00000026536, ENSMUSG00000024610,…	199	767	19596	3.72321	1.84424e-05	1.22924e-06	1.12333e-06
GOTERM_BP_FAT	GO:0035458~cellular response to interferon-beta	10	4.78469	8.66868e-09	ENSMUSG00000069874, ENSMUSG00000040264, ENSMUSG00000073491, ENSMUSG00000078853, ENSMUSG00000078920, ENSMUSG00000054072, ENSMUSG00000066677, ENSMUSG00000073489, ENSMUSG00000054203, ENSMUSG00000026536	199	60	19596	16.4121	4.05512e-05	2.53396e-06	2.31562e-06
GOTERM_BP_FAT	GO:0045597~positive regulation of cell differentiation	36	17.2249	1.3487e-08	ENSMUSG00000031451, ENSMUSG00000054675, ENSMUSG00000086962, ENSMUSG00000021250, ENSMUSG00000040249, ENSMUSG00000023992, ENSMUSG00000022346, ENSMUSG00000024621, ENSMUSG00000021215, ENSMUSG00000044786, ENSMUSG00000020027, ENSMUSG00000030748, ENSMUSG00000035692, ENSMUSG00000039533, ENSMUSG00000052934, ENSMUSG00000071637, ENSMUSG00000036856, ENSMUSG00000037868, ENSMUSG00000031980, ENSMUSG00000055254,…	199	1203	19596	2.9468	6.309e-05	3.7105e-06	3.39078e-06
GOTERM_BP_FAT	GO:0071495~cellular response to endogenous stimulus	39	18.6603	2.67789e-08	ENSMUSG00000034009, ENSMUSG00000031870, ENSMUSG00000031075, ENSMUSG00000005360, ENSMUSG00000052397, ENSMUSG00000055980, ENSMUSG00000021250, ENSMUSG00000040249, ENSMUSG00000023992, ENSMUSG00000028967, ENSMUSG00000022346, ENSMUSG00000047414, ENSMUSG00000015340, ENSMUSG00000044786, ENSMUSG00000020027, ENSMUSG00000016458, ENSMUSG00000032726, ENSMUSG00000038642, ENSMUSG00000031972, ENSMUSG00000039910,…	199	1419	19596	2.70643	0.000125264	6.95806e-06	6.35851e-06
GOTERM_BP_FAT	GO:0009719~response to endogenous stimulus	46	22.0096	2.90216e-08	ENSMUSG00000030222, ENSMUSG00000034009, ENSMUSG00000031870, ENSMUSG00000031075, ENSMUSG00000005360, ENSMUSG00000052397, ENSMUSG00000055980, ENSMUSG00000021250, ENSMUSG00000040249, ENSMUSG00000023992, ENSMUSG00000028967, ENSMUSG00000022346, ENSMUSG00000047414, ENSMUSG00000015340, ENSMUSG00000044786, ENSMUSG00000020027, ENSMUSG00000027716, ENSMUSG00000016458, ENSMUSG00000032726, ENSMUSG00000038642,…	199	1874	19596	2.41714	0.000135754	7.14391e-06	6.52834e-06
GOTERM_BP_FAT	GO:0035456~response to interferon-beta	10	4.78469	3.49575e-08	ENSMUSG00000069874, ENSMUSG00000040264, ENSMUSG00000073491, ENSMUSG00000078853, ENSMUSG00000078920, ENSMUSG00000054072, ENSMUSG00000066677, ENSMUSG00000073489, ENSMUSG00000054203, ENSMUSG00000026536	199	70	19596	14.0675	0.000163518	7.94904e-06	7.2641e-06
GOTERM_BP_FAT	GO:0031349~positive regulation of defense response	21	10.0478	3.56917e-08	ENSMUSG00000073491, ENSMUSG00000032661, ENSMUSG00000026077, ENSMUSG00000078853, ENSMUSG00000023992, ENSMUSG00000066677, ENSMUSG00000002897, ENSMUSG00000026536, ENSMUSG00000027514, ENSMUSG00000025017, ENSMUSG00000021356, ENSMUSG00000024610, ENSMUSG00000069874, ENSMUSG00000035042, ENSMUSG00000067212, ENSMUSG00000026938, ENSMUSG00000073489, ENSMUSG00000038642, ENSMUSG00000054203, ENSMUSG00000034652,…	199	452	19596	4.57504	0.000166952	7.94904e-06	7.2641e-06
GOTERM_BP_FAT	GO:0002683~negative regulation of immune system process	23	11.0048	5.03365e-08	ENSMUSG00000032661, ENSMUSG00000052397, ENSMUSG00000023992, ENSMUSG00000006205, ENSMUSG00000041202, ENSMUSG00000022346, ENSMUSG00000025017, ENSMUSG00000021356, ENSMUSG00000024610, ENSMUSG00000040152, ENSMUSG00000041120, ENSMUSG00000044786, ENSMUSG00000002602, ENSMUSG00000036594, ENSMUSG00000030748, ENSMUSG00000067212, ENSMUSG00000035692, ENSMUSG00000037321, ENSMUSG00000073421, ENSMUSG00000073489,…	199	555	19596	4.08084	0.000235446	1.07011e-05	9.77901e-06
GOTERM_BP_FAT	GO:0034341~response to interferon-gamma	13	6.2201	7.89787e-08	ENSMUSG00000029860, ENSMUSG00000078853, ENSMUSG00000060586, ENSMUSG00000022346, ENSMUSG00000024610, ENSMUSG00000069874, ENSMUSG00000040264, ENSMUSG00000036594, ENSMUSG00000035042, ENSMUSG00000009185, ENSMUSG00000073421, ENSMUSG00000105096, ENSMUSG00000018920	199	159	19596	8.0512	0.000369394	1.60601e-05	1.46763e-05
GOTERM_BP_FAT	GO:0010941~regulation of cell death	45	21.5311	1.22621e-07	ENSMUSG00000031451, ENSMUSG00000031870, ENSMUSG00000024042, ENSMUSG00000017969, ENSMUSG00000021250, ENSMUSG00000040249, ENSMUSG00000023992, ENSMUSG00000022346, ENSMUSG00000027514, ENSMUSG00000027656, ENSMUSG00000024621, ENSMUSG00000021215, ENSMUSG00000044786, ENSMUSG00000020704, ENSMUSG00000016458, ENSMUSG00000074345, ENSMUSG00000039910, ENSMUSG00000036887, ENSMUSG00000034612, ENSMUSG00000036856,…	199	1900	19596	2.33224	0.000573458	2.38958e-05	2.18368e-05
GOTERM_BP_FAT	GO:0008219~cell death	50	23.9234	2.34734e-07	ENSMUSG00000031870, ENSMUSG00000017969, ENSMUSG00000027656, ENSMUSG00000024621, ENSMUSG00000044786, ENSMUSG00000020704, ENSMUSG00000039910, ENSMUSG00000036887, ENSMUSG00000034612, ENSMUSG00000031980, ENSMUSG00000026077, ENSMUSG00000055254, ENSMUSG00000027004, ENSMUSG00000027322, ENSMUSG00000006205, ENSMUSG00000025789, ENSMUSG00000024610, ENSMUSG00000020733, ENSMUSG00000070034, ENSMUSG00000002602,…	199	2294	19596	2.1463	0.00109748	4.3914e-05	4.01301e-05
GOTERM_BP_FAT	GO:0045088~regulation of innate immune response	18	8.61244	2.94479e-07	ENSMUSG00000073491, ENSMUSG00000032661, ENSMUSG00000078853, ENSMUSG00000023992, ENSMUSG00000066677, ENSMUSG00000026536, ENSMUSG00000027514, ENSMUSG00000025017, ENSMUSG00000021356, ENSMUSG00000024610, ENSMUSG00000069874, ENSMUSG00000067212, ENSMUSG00000035692, ENSMUSG00000026938, ENSMUSG00000037321, ENSMUSG00000073489, ENSMUSG00000054203, ENSMUSG00000034652	199	376	19596	4.7141	0.00137663	5.29723e-05	4.84078e-05
GOTERM_BP_FAT	GO:0002504~antigen processing and presentation of peptide or polysaccharide antigen via MHC class II	7	3.34928	3.08788e-07	ENSMUSG00000040152, ENSMUSG00000036594, ENSMUSG00000073421, ENSMUSG00000023992, ENSMUSG00000038642, ENSMUSG00000060586, ENSMUSG00000024610	199	28	19596	24.6181	0.00144347	5.34889e-05	4.888e-05
GOTERM_BP_FAT	GO:0045089~positive regulation of innate immune response	16	7.6555	3.58376e-07	ENSMUSG00000073491, ENSMUSG00000032661, ENSMUSG00000078853, ENSMUSG00000023992, ENSMUSG00000066677, ENSMUSG00000026536, ENSMUSG00000027514, ENSMUSG00000025017, ENSMUSG00000021356, ENSMUSG00000024610, ENSMUSG00000069874, ENSMUSG00000067212, ENSMUSG00000026938, ENSMUSG00000073489, ENSMUSG00000054203, ENSMUSG00000034652	199	296	19596	5.32283	0.00167508	5.98616e-05	5.47036e-05
GOTERM_BP_FAT	GO:0050776~regulation of immune response	31	14.8325	4.91337e-07	ENSMUSG00000073491, ENSMUSG00000032661, ENSMUSG00000036905, ENSMUSG00000052397, ENSMUSG00000023992, ENSMUSG00000066677, ENSMUSG00000027514, ENSMUSG00000025017, ENSMUSG00000021356, ENSMUSG00000073418, ENSMUSG00000001128, ENSMUSG00000030748, ENSMUSG00000035692, ENSMUSG00000037379, ENSMUSG00000036887, ENSMUSG00000078853, ENSMUSG00000041202, ENSMUSG00000026536, ENSMUSG00000024610, ENSMUSG00000069874,…	199	1084	19596	2.81609	0.00229583	7.1812e-05	6.56242e-05
GOTERM_BP_FAT	GO:0045595~regulation of cell differentiation	47	22.488	4.80921e-07	ENSMUSG00000031451, ENSMUSG00000054675, ENSMUSG00000024042, ENSMUSG00000057003, ENSMUSG00000086962, ENSMUSG00000021250, ENSMUSG00000040249, ENSMUSG00000023992, ENSMUSG00000028967, ENSMUSG00000022346, ENSMUSG00000024621, ENSMUSG00000047414, ENSMUSG00000021215, ENSMUSG00000044786, ENSMUSG00000020027, ENSMUSG00000030748, ENSMUSG00000035692, ENSMUSG00000090698, ENSMUSG00000074622, ENSMUSG00000039533,…	199	2135	19596	2.16778	0.00224722	7.1812e-05	6.56242e-05
GOTERM_BP_FAT	GO:0007166~cell surface receptor signaling pathway	56	26.7943	4.69281e-07	ENSMUSG00000032089, ENSMUSG00000054072, ENSMUSG00000022840, ENSMUSG00000004730, ENSMUSG00000024621, ENSMUSG00000020027, ENSMUSG00000047414, ENSMUSG00000030748, ENSMUSG00000032726, ENSMUSG00000039910, ENSMUSG00000034612, ENSMUSG00000029860, ENSMUSG00000031980, ENSMUSG00000055254, ENSMUSG00000027004, ENSMUSG00000027322, ENSMUSG00000006205, ENSMUSG00000044017, ENSMUSG00000024610, ENSMUSG00000020733,…	199	2789	19596	1.97721	0.00219289	7.1812e-05	6.56242e-05
GOTERM_BP_FAT	GO:0002218~activation of innate immune response	14	6.69856	4.819e-07	ENSMUSG00000073491, ENSMUSG00000032661, ENSMUSG00000078853, ENSMUSG00000023992, ENSMUSG00000066677, ENSMUSG00000026536, ENSMUSG00000027514, ENSMUSG00000025017, ENSMUSG00000021356, ENSMUSG00000069874, ENSMUSG00000026938, ENSMUSG00000073489, ENSMUSG00000054203, ENSMUSG00000034652	199	224	19596	6.15452	0.00225179	7.1812e-05	6.56242e-05
GOTERM_BP_FAT	GO:0042127~regulation of cell proliferation	43	20.5742	5.89116e-07	ENSMUSG00000006014, ENSMUSG00000030222, ENSMUSG00000031451, ENSMUSG00000054675, ENSMUSG00000031870, ENSMUSG00000021390, ENSMUSG00000055980, ENSMUSG00000023992, ENSMUSG00000028967, ENSMUSG00000022346, ENSMUSG00000027656, ENSMUSG00000024621, ENSMUSG00000044786, ENSMUSG00000030748, ENSMUSG00000016458, ENSMUSG00000032725, ENSMUSG00000039910, ENSMUSG00000034612, ENSMUSG00000031980, ENSMUSG00000028871,…	199	1871	19596	2.26313	0.00275209	8.34938e-05	7.62994e-05
GOTERM_BP_FAT	GO:0044764~multi-organism cellular process	24	11.4833	6.59916e-07	ENSMUSG00000031451, ENSMUSG00000032661, ENSMUSG00000078853, ENSMUSG00000033450, ENSMUSG00000046805, ENSMUSG00000062488, ENSMUSG00000027322, ENSMUSG00000002897, ENSMUSG00000006205, ENSMUSG00000022346, ENSMUSG00000027514, ENSMUSG00000024621, ENSMUSG00000024610, ENSMUSG00000069874, ENSMUSG00000044786, ENSMUSG00000040264, ENSMUSG00000024713, ENSMUSG00000002602, ENSMUSG00000035042, ENSMUSG00000009185,…	199	698	19596	3.38587	0.00308233	9.07773e-05	8.29553e-05
GOTERM_BP_FAT	GO:0010942~positive regulation of cell death	25	11.9617	7.90233e-07	ENSMUSG00000024042, ENSMUSG00000017969, ENSMUSG00000021250, ENSMUSG00000040249, ENSMUSG00000022346, ENSMUSG00000027514, ENSMUSG00000021215, ENSMUSG00000016458, ENSMUSG00000036887, ENSMUSG00000031980, ENSMUSG00000027004, ENSMUSG00000027322, ENSMUSG00000000120, ENSMUSG00000006205, ENSMUSG00000025789, ENSMUSG00000040152, ENSMUSG00000038393, ENSMUSG00000020733, ENSMUSG00000070034, ENSMUSG00000035042,…	199	760	19596	3.23922	0.00368989	0.000102664	9.38182e-05
GOTERM_BP_FAT	GO:0001817~regulation of cytokine production	26	12.4402	7.77412e-07	ENSMUSG00000006014, ENSMUSG00000031451, ENSMUSG00000032661, ENSMUSG00000052397, ENSMUSG00000040249, ENSMUSG00000023992, ENSMUSG00000002897, ENSMUSG00000028967, ENSMUSG00000021356, ENSMUSG00000024621, ENSMUSG00000015340, ENSMUSG00000044786, ENSMUSG00000030748, ENSMUSG00000035692, ENSMUSG00000037379, ENSMUSG00000031980, ENSMUSG00000026536, ENSMUSG00000024610, ENSMUSG00000040152, ENSMUSG00000002602,…	199	815	19596	3.14145	0.00363013	0.000102664	9.38182e-05
GOTERM_BP_FAT	GO:0002478~antigen processing and presentation of exogenous peptide antigen	7	3.34928	1.04809e-06	ENSMUSG00000036594, ENSMUSG00000067212, ENSMUSG00000073421, ENSMUSG00000037321, ENSMUSG00000038642, ENSMUSG00000060586, ENSMUSG00000024610	199	34	19596	20.2737	0.00489099	0.000132485	0.000121069
GOTERM_BP_FAT	GO:0050778~positive regulation of immune response	27	12.9187	1.29716e-06	ENSMUSG00000073491, ENSMUSG00000032661, ENSMUSG00000036905, ENSMUSG00000052397, ENSMUSG00000023992, ENSMUSG00000066677, ENSMUSG00000027514, ENSMUSG00000025017, ENSMUSG00000021356, ENSMUSG00000073418, ENSMUSG00000001128, ENSMUSG00000030748, ENSMUSG00000037379, ENSMUSG00000036887, ENSMUSG00000078853, ENSMUSG00000026536, ENSMUSG00000024610, ENSMUSG00000069874, ENSMUSG00000067212, ENSMUSG00000026938,…	199	896	19596	2.96736	0.00604974	0.000159653	0.000145896
GOTERM_BP_FAT	GO:0080134~regulation of response to stress	38	18.1818	1.3704e-06	ENSMUSG00000073491, ENSMUSG00000032661, ENSMUSG00000052397, ENSMUSG00000017969, ENSMUSG00000040249, ENSMUSG00000023992, ENSMUSG00000066677, ENSMUSG00000002897, ENSMUSG00000028967, ENSMUSG00000022346, ENSMUSG00000027514, ENSMUSG00000025017, ENSMUSG00000021356, ENSMUSG00000044786, ENSMUSG00000027716, ENSMUSG00000035692, ENSMUSG00000038642, ENSMUSG00000029860, ENSMUSG00000036856, ENSMUSG00000031980,…	199	1590	19596	2.35343	0.00639025	0.000164343	0.000150182
GOTERM_BP_FAT	GO:0001816~cytokine production	26	12.4402	1.52759e-06	ENSMUSG00000006014, ENSMUSG00000031451, ENSMUSG00000032661, ENSMUSG00000052397, ENSMUSG00000040249, ENSMUSG00000023992, ENSMUSG00000002897, ENSMUSG00000028967, ENSMUSG00000021356, ENSMUSG00000024621, ENSMUSG00000015340, ENSMUSG00000044786, ENSMUSG00000030748, ENSMUSG00000035692, ENSMUSG00000037379, ENSMUSG00000031980, ENSMUSG00000026536, ENSMUSG00000024610, ENSMUSG00000040152, ENSMUSG00000002602,…	199	846	19596	3.02634	0.00712062	0.000178614	0.000163223
GOTERM_BP_FAT	GO:0016032~viral process	23	11.0048	1.58832e-06	ENSMUSG00000031451, ENSMUSG00000032661, ENSMUSG00000078853, ENSMUSG00000033450, ENSMUSG00000062488, ENSMUSG00000027322, ENSMUSG00000002897, ENSMUSG00000006205, ENSMUSG00000022346, ENSMUSG00000027514, ENSMUSG00000024621, ENSMUSG00000024610, ENSMUSG00000069874, ENSMUSG00000044786, ENSMUSG00000040264, ENSMUSG00000024713, ENSMUSG00000002602, ENSMUSG00000035042, ENSMUSG00000009185, ENSMUSG00000035692,…	199	680	19596	3.33068	0.00740264	0.000181185	0.000165573
GOTERM_BP_FAT	GO:0016477~cell migration	37	17.7033	1.65819e-06	ENSMUSG00000031451, ENSMUSG00000031870, ENSMUSG00000055980, ENSMUSG00000040249, ENSMUSG00000023992, ENSMUSG00000002897, ENSMUSG00000022346, ENSMUSG00000040026, ENSMUSG00000024621, ENSMUSG00000047414, ENSMUSG00000021215, ENSMUSG00000057729, ENSMUSG00000052934, ENSMUSG00000039910, ENSMUSG00000036856, ENSMUSG00000031980, ENSMUSG00000018849, ENSMUSG00000055254, ENSMUSG00000023046, ENSMUSG00000043969,…	199	1536	19596	2.37206	0.00772703	0.000184652	0.000168741
GOTERM_BP_FAT	GO:0051962~positive regulation of nervous system development	23	11.0048	1.87753e-06	ENSMUSG00000037868, ENSMUSG00000031980, ENSMUSG00000055254, ENSMUSG00000049112, ENSMUSG00000040249, ENSMUSG00000023992, ENSMUSG00000025789, ENSMUSG00000000120, ENSMUSG00000022893, ENSMUSG00000022346, ENSMUSG00000025885, ENSMUSG00000041120, ENSMUSG00000047414, ENSMUSG00000020027, ENSMUSG00000019970, ENSMUSG00000047787, ENSMUSG00000035042, ENSMUSG00000036098, ENSMUSG00000020704, ENSMUSG00000030854,…	199	687	19596	3.29675	0.00874466	0.000204215	0.000186618
GOTERM_BP_FAT	GO:0042981~regulation of apoptotic process	39	18.6603	2.32403e-06	ENSMUSG00000031451, ENSMUSG00000031870, ENSMUSG00000024042, ENSMUSG00000017969, ENSMUSG00000040249, ENSMUSG00000023992, ENSMUSG00000022346, ENSMUSG00000027514, ENSMUSG00000024621, ENSMUSG00000021215, ENSMUSG00000044786, ENSMUSG00000020704, ENSMUSG00000016458, ENSMUSG00000074345, ENSMUSG00000039910, ENSMUSG00000034612, ENSMUSG00000036856, ENSMUSG00000031980, ENSMUSG00000055254, ENSMUSG00000048387,…	199	1694	19596	2.26707	0.010813	0.000245005	0.000223894
GOTERM_BP_FAT	GO:0033993~response to lipid	31	14.8325	2.45097e-06	ENSMUSG00000032089, ENSMUSG00000031870, ENSMUSG00000055980, ENSMUSG00000021250, ENSMUSG00000023992, ENSMUSG00000028967, ENSMUSG00000022346, ENSMUSG00000022840, ENSMUSG00000015340, ENSMUSG00000044786, ENSMUSG00000020027, ENSMUSG00000037379, ENSMUSG00000031972, ENSMUSG00000031980, ENSMUSG00000078853, ENSMUSG00000055254, ENSMUSG00000049112, ENSMUSG00000048387, ENSMUSG00000033161, ENSMUSG00000040152,…	199	1172	19596	2.60464	0.0114002	0.000245005	0.000223894
GOTERM_BP_FAT	GO:0002253~activation of immune response	22	10.5263	2.4621e-06	ENSMUSG00000073491, ENSMUSG00000032661, ENSMUSG00000036905, ENSMUSG00000052397, ENSMUSG00000078853, ENSMUSG00000023992, ENSMUSG00000066677, ENSMUSG00000026536, ENSMUSG00000027514, ENSMUSG00000025017, ENSMUSG00000021356, ENSMUSG00000069874, ENSMUSG00000073418, ENSMUSG00000001128, ENSMUSG00000026938, ENSMUSG00000073421, ENSMUSG00000078612, ENSMUSG00000073489, ENSMUSG00000054203, ENSMUSG00000034652,…	199	644	19596	3.36396	0.0114517	0.000245005	0.000223894
GOTERM_BP_FAT	GO:0001819~positive regulation of cytokine production	20	9.56938	2.41599e-06	ENSMUSG00000032661, ENSMUSG00000031980, ENSMUSG00000040249, ENSMUSG00000023992, ENSMUSG00000002897, ENSMUSG00000026536, ENSMUSG00000021356, ENSMUSG00000024621, ENSMUSG00000024610, ENSMUSG00000040152, ENSMUSG00000015340, ENSMUSG00000035042, ENSMUSG00000030748, ENSMUSG00000067212, ENSMUSG00000035692, ENSMUSG00000026938, ENSMUSG00000056529, ENSMUSG00000037379, ENSMUSG00000073489, ENSMUSG00000054203	199	538	19596	3.66068	0.0112384	0.000245005	0.000223894
GOTERM_BP_FAT	GO:0019221~cytokine-mediated signaling pathway	18	8.61244	2.5555e-06	ENSMUSG00000049382, ENSMUSG00000031451, ENSMUSG00000032661, ENSMUSG00000032089, ENSMUSG00000078853, ENSMUSG00000023992, ENSMUSG00000054072, ENSMUSG00000002897, ENSMUSG00000027514, ENSMUSG00000024621, ENSMUSG00000024610, ENSMUSG00000069874, ENSMUSG00000002602, ENSMUSG00000035042, ENSMUSG00000030748, ENSMUSG00000009185, ENSMUSG00000035692, ENSMUSG00000056427	199	440	19596	4.02841	0.0118835	0.000249002	0.000227546
GOTERM_BP_FAT	GO:0043067~regulation of programmed cell death	39	18.6603	3.2463e-06	ENSMUSG00000031451, ENSMUSG00000031870, ENSMUSG00000024042, ENSMUSG00000017969, ENSMUSG00000040249, ENSMUSG00000023992, ENSMUSG00000022346, ENSMUSG00000027514, ENSMUSG00000024621, ENSMUSG00000021215, ENSMUSG00000044786, ENSMUSG00000020704, ENSMUSG00000016458, ENSMUSG00000074345, ENSMUSG00000039910, ENSMUSG00000034612, ENSMUSG00000036856, ENSMUSG00000031980, ENSMUSG00000055254, ENSMUSG00000048387,…	199	1718	19596	2.2354	0.0150715	0.000302993	0.000276885
GOTERM_BP_FAT	GO:0019884~antigen processing and presentation of exogenous antigen	7	3.34928	3.30396e-06	ENSMUSG00000036594, ENSMUSG00000067212, ENSMUSG00000073421, ENSMUSG00000037321, ENSMUSG00000038642, ENSMUSG00000060586, ENSMUSG00000024610	199	41	19596	16.8124	0.0153371	0.000302993	0.000276885
GOTERM_BP_FAT	GO:0006915~apoptotic process	43	20.5742	3.20526e-06	ENSMUSG00000049382, ENSMUSG00000031451, ENSMUSG00000031870, ENSMUSG00000024042, ENSMUSG00000017969, ENSMUSG00000056870, ENSMUSG00000040249, ENSMUSG00000023992, ENSMUSG00000022346, ENSMUSG00000027514, ENSMUSG00000024621, ENSMUSG00000021215, ENSMUSG00000044786, ENSMUSG00000020704, ENSMUSG00000016458, ENSMUSG00000039910, ENSMUSG00000034612, ENSMUSG00000036856, ENSMUSG00000031980, ENSMUSG00000055254,…	199	1997	19596	2.12034	0.0148824	0.000302993	0.000276885
GOTERM_BP_FAT	GO:0002495~antigen processing and presentation of peptide antigen via MHC class II	6	2.87081	3.6403e-06	ENSMUSG00000036594, ENSMUSG00000073421, ENSMUSG00000023992, ENSMUSG00000038642, ENSMUSG00000060586, ENSMUSG00000024610	199	24	19596	24.6181	0.0168852	0.000327417	0.000299204
GOTERM_BP_FAT	GO:0044419~interspecies interaction between organisms	24	11.4833	4.48027e-06	ENSMUSG00000031451, ENSMUSG00000032661, ENSMUSG00000078853, ENSMUSG00000033450, ENSMUSG00000062488, ENSMUSG00000027322, ENSMUSG00000002897, ENSMUSG00000006205, ENSMUSG00000022346, ENSMUSG00000027514, ENSMUSG00000024621, ENSMUSG00000024610, ENSMUSG00000069874, ENSMUSG00000044786, ENSMUSG00000040264, ENSMUSG00000024713, ENSMUSG00000002602, ENSMUSG00000035042, ENSMUSG00000051906, ENSMUSG00000009185,…	199	782	19596	3.02217	0.0207407	0.000395363	0.000361296
GOTERM_BP_FAT	GO:0012501~programmed cell death	44	21.0526	5.21274e-06	ENSMUSG00000049382, ENSMUSG00000031451, ENSMUSG00000031870, ENSMUSG00000024042, ENSMUSG00000017969, ENSMUSG00000056870, ENSMUSG00000040249, ENSMUSG00000023992, ENSMUSG00000022346, ENSMUSG00000027514, ENSMUSG00000024621, ENSMUSG00000021215, ENSMUSG00000044786, ENSMUSG00000020704, ENSMUSG00000016458, ENSMUSG00000074345, ENSMUSG00000039910, ENSMUSG00000034612, ENSMUSG00000036856, ENSMUSG00000031980,…	199	2108	19596	2.0554	0.0240903	0.000443272	0.000405077
GOTERM_BP_FAT	GO:0006954~inflammatory response	23	11.0048	5.2116e-06	ENSMUSG00000017969, ENSMUSG00000048087, ENSMUSG00000023992, ENSMUSG00000027597, ENSMUSG00000002897, ENSMUSG00000041202, ENSMUSG00000040026, ENSMUSG00000027514, ENSMUSG00000024621, ENSMUSG00000040152, ENSMUSG00000015340, ENSMUSG00000044786, ENSMUSG00000073418, ENSMUSG00000002602, ENSMUSG00000035042, ENSMUSG00000030748, ENSMUSG00000067212, ENSMUSG00000009185, ENSMUSG00000037440, ENSMUSG00000056529,…	199	732	19596	3.09408	0.0240851	0.000443272	0.000405077
GOTERM_BP_FAT	GO:0044093~positive regulation of molecular function	38	18.1818	5.83005e-06	ENSMUSG00000031453, ENSMUSG00000034009, ENSMUSG00000031451, ENSMUSG00000055980, ENSMUSG00000040249, ENSMUSG00000023992, ENSMUSG00000022346, ENSMUSG00000021356, ENSMUSG00000024621, ENSMUSG00000021215, ENSMUSG00000089774, ENSMUSG00000020704, ENSMUSG00000074345, ENSMUSG00000057729, ENSMUSG00000039533, ENSMUSG00000038642, ENSMUSG00000019787, ENSMUSG00000036856, ENSMUSG00000033763, ENSMUSG00000031980,…	199	1692	19596	2.21155	0.0269045	0.000478371	0.000437152
GOTERM_BP_FAT	GO:0002252~immune effector process	29	13.8756	5.73325e-06	ENSMUSG00000032661, ENSMUSG00000036905, ENSMUSG00000033450, ENSMUSG00000040249, ENSMUSG00000023992, ENSMUSG00000027514, ENSMUSG00000021356, ENSMUSG00000073418, ENSMUSG00000040264, ENSMUSG00000001128, ENSMUSG00000030748, ENSMUSG00000035692, ENSMUSG00000037379, ENSMUSG00000036887, ENSMUSG00000062488, ENSMUSG00000060586, ENSMUSG00000006205, ENSMUSG00000024610, ENSMUSG00000035042, ENSMUSG00000036594,…	199	1096	19596	2.60556	0.0264637	0.000478371	0.000437152
GOTERM_BP_FAT	GO:0048017~inositol lipid-mediated signaling	11	5.26316	7.89477e-06	ENSMUSG00000031980, ENSMUSG00000020733, ENSMUSG00000052397, ENSMUSG00000035042, ENSMUSG00000055254, ENSMUSG00000055980, ENSMUSG00000056529, ENSMUSG00000074345, ENSMUSG00000023992, ENSMUSG00000024621, ENSMUSG00000025017	199	167	19596	6.4862	0.0362582	0.000628514	0.000574357
GOTERM_BP_FAT	GO:0009607~response to biotic stimulus	36	17.2249	7.92865e-06	ENSMUSG00000049382, ENSMUSG00000032661, ENSMUSG00000032089, ENSMUSG00000033450, ENSMUSG00000021250, ENSMUSG00000046805, ENSMUSG00000054072, ENSMUSG00000023992, ENSMUSG00000002897, ENSMUSG00000022346, ENSMUSG00000027514, ENSMUSG00000040026, ENSMUSG00000021356, ENSMUSG00000044786, ENSMUSG00000040264, ENSMUSG00000030748, ENSMUSG00000035692, ENSMUSG00000037379, ENSMUSG00000019787, ENSMUSG00000078853,…	199	1577	19596	2.24794	0.036411	0.000628514	0.000574357
GOTERM_BP_FAT	GO:0070371~ERK1 and ERK2 cascade	15	7.17703	8.65029e-06	ENSMUSG00000031451, ENSMUSG00000031980, ENSMUSG00000052397, ENSMUSG00000049112, ENSMUSG00000040249, ENSMUSG00000023992, ENSMUSG00000028967, ENSMUSG00000022346, ENSMUSG00000024621, ENSMUSG00000024610, ENSMUSG00000020733, ENSMUSG00000035042, ENSMUSG00000009185, ENSMUSG00000074345, ENSMUSG00000032359	199	336	19596	4.39609	0.0396584	0.00067429	0.000616189
GOTERM_BP_FAT	GO:0072075~metanephric mesenchyme development	5	2.39234	9.35029e-06	ENSMUSG00000036856, ENSMUSG00000048387, ENSMUSG00000016458, ENSMUSG00000045680, ENSMUSG00000022346	199	14	19596	35.1687	0.042798	0.000705343	0.000644567
GOTERM_BP_FAT	GO:0022610~biological adhesion	35	16.7464	9.26216e-06	ENSMUSG00000031451, ENSMUSG00000052397, ENSMUSG00000058297, ENSMUSG00000040249, ENSMUSG00000027656, ENSMUSG00000047414, ENSMUSG00000021215, ENSMUSG00000040264, ENSMUSG00000030748, ENSMUSG00000047793, ENSMUSG00000032725, ENSMUSG00000037379, ENSMUSG00000039910, ENSMUSG00000029860, ENSMUSG00000036856, ENSMUSG00000031980, ENSMUSG00000027322, ENSMUSG00000060586, ENSMUSG00000041202, ENSMUSG00000024610,…	199	1520	19596	2.26746	0.0424033	0.000705343	0.000644567
GOTERM_BP_FAT	GO:0044403~symbiosis, encompassing mutualism through parasitism	23	11.0048	9.60747e-06	ENSMUSG00000031451, ENSMUSG00000032661, ENSMUSG00000078853, ENSMUSG00000033450, ENSMUSG00000062488, ENSMUSG00000027322, ENSMUSG00000002897, ENSMUSG00000006205, ENSMUSG00000022346, ENSMUSG00000027514, ENSMUSG00000024621, ENSMUSG00000024610, ENSMUSG00000069874, ENSMUSG00000044786, ENSMUSG00000040264, ENSMUSG00000024713, ENSMUSG00000002602, ENSMUSG00000035042, ENSMUSG00000009185, ENSMUSG00000035692,…	199	761	19596	2.97617	0.0439489	0.000711136	0.00064986
GOTERM_BP_FAT	GO:0010646~regulation of cell communication	63	30.1435	9.73118e-06	ENSMUSG00000032089, ENSMUSG00000031075, ENSMUSG00000017969, ENSMUSG00000022840, ENSMUSG00000024621, ENSMUSG00000021356, ENSMUSG00000020027, ENSMUSG00000032726, ENSMUSG00000039910, ENSMUSG00000019787, ENSMUSG00000034612, ENSMUSG00000031980, ENSMUSG00000055254, ENSMUSG00000023046, ENSMUSG00000027004, ENSMUSG00000027322, ENSMUSG00000006205, ENSMUSG00000024610, ENSMUSG00000020733, ENSMUSG00000002602,…	199	3634	19596	1.70714	0.0445021	0.000711136	0.00064986
GOTERM_BP_FAT	GO:0007167~enzyme linked receptor protein signaling pathway	26	12.4402	1.11721e-05	ENSMUSG00000031451, ENSMUSG00000055980, ENSMUSG00000021250, ENSMUSG00000040249, ENSMUSG00000028967, ENSMUSG00000024621, ENSMUSG00000047414, ENSMUSG00000020027, ENSMUSG00000032726, ENSMUSG00000039910, ENSMUSG00000034612, ENSMUSG00000029860, ENSMUSG00000036856, ENSMUSG00000031980, ENSMUSG00000055254, ENSMUSG00000000120, ENSMUSG00000006205, ENSMUSG00000040152, ENSMUSG00000041120, ENSMUSG00000047787,…	199	948	19596	2.70072	0.0509213	0.000803878	0.00073461
GOTERM_BP_FAT	GO:0023051~regulation of signaling	63	30.1435	1.20455e-05	ENSMUSG00000032089, ENSMUSG00000031075, ENSMUSG00000017969, ENSMUSG00000022840, ENSMUSG00000024621, ENSMUSG00000021356, ENSMUSG00000020027, ENSMUSG00000032726, ENSMUSG00000039910, ENSMUSG00000019787, ENSMUSG00000034612, ENSMUSG00000031980, ENSMUSG00000055254, ENSMUSG00000023046, ENSMUSG00000027004, ENSMUSG00000027322, ENSMUSG00000006205, ENSMUSG00000024610, ENSMUSG00000020733, ENSMUSG00000002602,…	199	3658	19596	1.69594	0.0547912	0.000850476	0.000777193
GOTERM_BP_FAT	GO:0002521~leukocyte differentiation	21	10.0478	1.21834e-05	ENSMUSG00000036856, ENSMUSG00000031451, ENSMUSG00000051495, ENSMUSG00000021250, ENSMUSG00000023992, ENSMUSG00000041202, ENSMUSG00000022346, ENSMUSG00000021356, ENSMUSG00000024621, ENSMUSG00000024610, ENSMUSG00000002602, ENSMUSG00000036594, ENSMUSG00000035042, ENSMUSG00000030748, ENSMUSG00000037440, ENSMUSG00000073421, ENSMUSG00000073489, ENSMUSG00000057729, ENSMUSG00000074622, ENSMUSG00000036896,…	199	658	19596	3.14273	0.0554006	0.000850476	0.000777193
GOTERM_BP_FAT	GO:0009967~positive regulation of signal transduction	37	17.7033	1.28043e-05	ENSMUSG00000031451, ENSMUSG00000032089, ENSMUSG00000017969, ENSMUSG00000055980, ENSMUSG00000040249, ENSMUSG00000023992, ENSMUSG00000022346, ENSMUSG00000027514, ENSMUSG00000025017, ENSMUSG00000024621, ENSMUSG00000021215, ENSMUSG00000032726, ENSMUSG00000074345, ENSMUSG00000039533, ENSMUSG00000039910, ENSMUSG00000019787, ENSMUSG00000031980, ENSMUSG00000028871, ENSMUSG00000018849, ENSMUSG00000078853,…	199	1682	19596	2.16616	0.0581404	0.000880675	0.00080479
GOTERM_BP_FAT	GO:0010647~positive regulation of cell communication	42	20.0957	1.31842e-05	ENSMUSG00000031451, ENSMUSG00000032089, ENSMUSG00000031075, ENSMUSG00000005360, ENSMUSG00000017969, ENSMUSG00000055980, ENSMUSG00000040249, ENSMUSG00000023992, ENSMUSG00000022346, ENSMUSG00000027514, ENSMUSG00000025017, ENSMUSG00000024621, ENSMUSG00000021215, ENSMUSG00000032726, ENSMUSG00000074345, ENSMUSG00000039533, ENSMUSG00000039910, ENSMUSG00000019787, ENSMUSG00000031980, ENSMUSG00000028871,…	199	2041	19596	2.02638	0.0598127	0.000893661	0.000816657
GOTERM_BP_FAT	GO:0001959~regulation of cytokine-mediated signaling pathway	10	4.78469	1.35755e-05	ENSMUSG00000069874, ENSMUSG00000031451, ENSMUSG00000032661, ENSMUSG00000078853, ENSMUSG00000002602, ENSMUSG00000035692, ENSMUSG00000023992, ENSMUSG00000027514, ENSMUSG00000056427, ENSMUSG00000024610	199	141	19596	6.98386	0.0615319	0.000907035	0.000828879
GOTERM_BP_FAT	GO:0002520~immune system development	29	13.8756	1.39684e-05	ENSMUSG00000006014, ENSMUSG00000031451, ENSMUSG00000086962, ENSMUSG00000021250, ENSMUSG00000023992, ENSMUSG00000022346, ENSMUSG00000021356, ENSMUSG00000024621, ENSMUSG00000020961, ENSMUSG00000044786, ENSMUSG00000030748, ENSMUSG00000035692, ENSMUSG00000057729, ENSMUSG00000074622, ENSMUSG00000071637, ENSMUSG00000039910, ENSMUSG00000036856, ENSMUSG00000051495, ENSMUSG00000041202, ENSMUSG00000024610,…	199	1150	19596	2.48322	0.0632552	0.000920141	0.000840856
GOTERM_BP_FAT	GO:0048534~hematopoietic or lymphoid organ development	28	13.3971	1.4433e-05	ENSMUSG00000006014, ENSMUSG00000031451, ENSMUSG00000086962, ENSMUSG00000021250, ENSMUSG00000023992, ENSMUSG00000022346, ENSMUSG00000021356, ENSMUSG00000024621, ENSMUSG00000020961, ENSMUSG00000044786, ENSMUSG00000030748, ENSMUSG00000035692, ENSMUSG00000057729, ENSMUSG00000074622, ENSMUSG00000071637, ENSMUSG00000039910, ENSMUSG00000036856, ENSMUSG00000051495, ENSMUSG00000041202, ENSMUSG00000024610,…	199	1088	19596	2.53422	0.0652893	0.000927241	0.000847344
GOTERM_BP_FAT	GO:0023056~positive regulation of signaling	42	20.0957	1.44727e-05	ENSMUSG00000031451, ENSMUSG00000032089, ENSMUSG00000031075, ENSMUSG00000005360, ENSMUSG00000017969, ENSMUSG00000055980, ENSMUSG00000040249, ENSMUSG00000023992, ENSMUSG00000022346, ENSMUSG00000027514, ENSMUSG00000025017, ENSMUSG00000024621, ENSMUSG00000021215, ENSMUSG00000032726, ENSMUSG00000074345, ENSMUSG00000039533, ENSMUSG00000039910, ENSMUSG00000019787, ENSMUSG00000031980, ENSMUSG00000028871,…	199	2049	19596	2.01847	0.0654625	0.000927241	0.000847344
GOTERM_BP_FAT	GO:0048002~antigen processing and presentation of peptide antigen	8	3.82775	1.51563e-05	ENSMUSG00000036594, ENSMUSG00000067212, ENSMUSG00000073421, ENSMUSG00000037321, ENSMUSG00000023992, ENSMUSG00000038642, ENSMUSG00000060586, ENSMUSG00000024610	199	79	19596	9.97188	0.0684463	0.000957916	0.000875376
GOTERM_BP_FAT	GO:0009725~response to hormone	25	11.9617	1.66617e-05	ENSMUSG00000030222, ENSMUSG00000034009, ENSMUSG00000031870, ENSMUSG00000055980, ENSMUSG00000021250, ENSMUSG00000028967, ENSMUSG00000022346, ENSMUSG00000015340, ENSMUSG00000044786, ENSMUSG00000020027, ENSMUSG00000016458, ENSMUSG00000038642, ENSMUSG00000031972, ENSMUSG00000037868, ENSMUSG00000031980, ENSMUSG00000055254, ENSMUSG00000049112, ENSMUSG00000033161, ENSMUSG00000019970, ENSMUSG00000038393,…	199	909	19596	2.70826	0.0749837	0.00103902	0.000949492
GOTERM_BP_FAT	GO:0043085~positive regulation of catalytic activity	31	14.8325	1.70909e-05	ENSMUSG00000031453, ENSMUSG00000034009, ENSMUSG00000031451, ENSMUSG00000055980, ENSMUSG00000023992, ENSMUSG00000022346, ENSMUSG00000024621, ENSMUSG00000021215, ENSMUSG00000089774, ENSMUSG00000074345, ENSMUSG00000057729, ENSMUSG00000039533, ENSMUSG00000036856, ENSMUSG00000033763, ENSMUSG00000031980, ENSMUSG00000078853, ENSMUSG00000055254, ENSMUSG00000023046, ENSMUSG00000000120, ENSMUSG00000024610,…	199	1294	19596	2.35908	0.0768393	0.00105177	0.000961138
GOTERM_BP_FAT	GO:0030097~hemopoiesis	27	12.9187	1.8007e-05	ENSMUSG00000006014, ENSMUSG00000031451, ENSMUSG00000086962, ENSMUSG00000021250, ENSMUSG00000023992, ENSMUSG00000022346, ENSMUSG00000021356, ENSMUSG00000024621, ENSMUSG00000020961, ENSMUSG00000044786, ENSMUSG00000030748, ENSMUSG00000035692, ENSMUSG00000057729, ENSMUSG00000074622, ENSMUSG00000071637, ENSMUSG00000039910, ENSMUSG00000036856, ENSMUSG00000051495, ENSMUSG00000041202, ENSMUSG00000024610,…	199	1038	19596	2.56142	0.0807869	0.00108402	0.000990617
GOTERM_BP_FAT	GO:0009966~regulation of signal transduction	55	26.3158	1.80786e-05	ENSMUSG00000032089, ENSMUSG00000017969, ENSMUSG00000024621, ENSMUSG00000021356, ENSMUSG00000020027, ENSMUSG00000032726, ENSMUSG00000039910, ENSMUSG00000019787, ENSMUSG00000034612, ENSMUSG00000031980, ENSMUSG00000055254, ENSMUSG00000023046, ENSMUSG00000027004, ENSMUSG00000027322, ENSMUSG00000006205, ENSMUSG00000024610, ENSMUSG00000020733, ENSMUSG00000002602, ENSMUSG00000037440, ENSMUSG00000034573,…	199	3060	19596	1.76993	0.0810951	0.00108402	0.000990617
GOTERM_BP_FAT	GO:0008283~cell proliferation	43	20.5742	1.89472e-05	ENSMUSG00000006014, ENSMUSG00000030222, ENSMUSG00000031451, ENSMUSG00000054675, ENSMUSG00000031870, ENSMUSG00000021390, ENSMUSG00000055980, ENSMUSG00000040249, ENSMUSG00000023992, ENSMUSG00000028967, ENSMUSG00000022346, ENSMUSG00000027656, ENSMUSG00000024621, ENSMUSG00000044786, ENSMUSG00000016458, ENSMUSG00000032725, ENSMUSG00000039910, ENSMUSG00000036856, ENSMUSG00000031980, ENSMUSG00000028871,…	199	2146	19596	1.97312	0.0848214	0.0011077	0.00101226
GOTERM_BP_FAT	GO:0001961~positive regulation of cytokine-mediated signaling pathway	7	3.34928	1.89416e-05	ENSMUSG00000069874, ENSMUSG00000031451, ENSMUSG00000078853, ENSMUSG00000002602, ENSMUSG00000023992, ENSMUSG00000027514, ENSMUSG00000024610	199	55	19596	12.5328	0.0847974	0.0011077	0.00101226
GOTERM_BP_FAT	GO:1901700~response to oxygen-containing compound	42	20.0957	1.97294e-05	ENSMUSG00000049382, ENSMUSG00000031451, ENSMUSG00000032089, ENSMUSG00000031870, ENSMUSG00000031075, ENSMUSG00000005360, ENSMUSG00000052397, ENSMUSG00000055980, ENSMUSG00000021250, ENSMUSG00000040249, ENSMUSG00000023992, ENSMUSG00000028967, ENSMUSG00000022346, ENSMUSG00000022840, ENSMUSG00000015340, ENSMUSG00000021215, ENSMUSG00000044786, ENSMUSG00000020027, ENSMUSG00000027716, ENSMUSG00000037379,…	199	2076	19596	1.99222	0.088164	0.00112684	0.00102974
GOTERM_BP_FAT	GO:0007155~cell adhesion	34	16.2679	1.97564e-05	ENSMUSG00000031451, ENSMUSG00000052397, ENSMUSG00000058297, ENSMUSG00000040249, ENSMUSG00000027656, ENSMUSG00000047414, ENSMUSG00000021215, ENSMUSG00000030748, ENSMUSG00000047793, ENSMUSG00000032725, ENSMUSG00000037379, ENSMUSG00000039910, ENSMUSG00000029860, ENSMUSG00000036856, ENSMUSG00000031980, ENSMUSG00000027322, ENSMUSG00000060586, ENSMUSG00000041202, ENSMUSG00000024610, ENSMUSG00000040152,…	199	1507	19596	2.22167	0.088279	0.00112684	0.00102974
GOTERM_BP_FAT	GO:0051674~localization of cell	38	18.1818	2.07677e-05	ENSMUSG00000031451, ENSMUSG00000031870, ENSMUSG00000055980, ENSMUSG00000040249, ENSMUSG00000023992, ENSMUSG00000002897, ENSMUSG00000022346, ENSMUSG00000040026, ENSMUSG00000024621, ENSMUSG00000047414, ENSMUSG00000021215, ENSMUSG00000016458, ENSMUSG00000057729, ENSMUSG00000052934, ENSMUSG00000039910, ENSMUSG00000036856, ENSMUSG00000031980, ENSMUSG00000018849, ENSMUSG00000055254, ENSMUSG00000023046,…	199	1791	19596	2.08931	0.0925822	0.00115632	0.00105668
GOTERM_BP_FAT	GO:0048870~cell motility	38	18.1818	2.07677e-05	ENSMUSG00000031451, ENSMUSG00000031870, ENSMUSG00000055980, ENSMUSG00000040249, ENSMUSG00000023992, ENSMUSG00000002897, ENSMUSG00000022346, ENSMUSG00000040026, ENSMUSG00000024621, ENSMUSG00000047414, ENSMUSG00000021215, ENSMUSG00000016458, ENSMUSG00000057729, ENSMUSG00000052934, ENSMUSG00000039910, ENSMUSG00000036856, ENSMUSG00000031980, ENSMUSG00000018849, ENSMUSG00000055254, ENSMUSG00000023046,…	199	1791	19596	2.08931	0.0925822	0.00115632	0.00105668
GOTERM_BP_FAT	GO:0051049~regulation of transport	41	19.6172	2.11679e-05	ENSMUSG00000031451, ENSMUSG00000031075, ENSMUSG00000024042, ENSMUSG00000027574, ENSMUSG00000052397, ENSMUSG00000055980, ENSMUSG00000040249, ENSMUSG00000023992, ENSMUSG00000022346, ENSMUSG00000022840, ENSMUSG00000042985, ENSMUSG00000020961, ENSMUSG00000015340, ENSMUSG00000027716, ENSMUSG00000089774, ENSMUSG00000030748, ENSMUSG00000020704, ENSMUSG00000032726, ENSMUSG00000057729, ENSMUSG00000038642,…	199	2009	19596	2.00964	0.0942797	0.00115719	0.00105748
GOTERM_BP_FAT	GO:0009887~animal organ morphogenesis	29	13.8756	2.12782e-05	ENSMUSG00000054675, ENSMUSG00000031870, ENSMUSG00000057322, ENSMUSG00000028967, ENSMUSG00000022346, ENSMUSG00000047414, ENSMUSG00000016458, ENSMUSG00000074622, ENSMUSG00000031972, ENSMUSG00000039910, ENSMUSG00000034612, ENSMUSG00000036856, ENSMUSG00000031980, ENSMUSG00000055254, ENSMUSG00000048387, ENSMUSG00000027004, ENSMUSG00000043969, ENSMUSG00000044217, ENSMUSG00000000120, ENSMUSG00000006205,…	199	1177	19596	2.42625	0.0947467	0.00115719	0.00105748
GOTERM_BP_FAT	GO:0051707~response to other organism	34	16.2679	2.16952e-05	ENSMUSG00000049382, ENSMUSG00000032661, ENSMUSG00000032089, ENSMUSG00000033450, ENSMUSG00000021250, ENSMUSG00000046805, ENSMUSG00000054072, ENSMUSG00000023992, ENSMUSG00000002897, ENSMUSG00000027514, ENSMUSG00000040026, ENSMUSG00000021356, ENSMUSG00000044786, ENSMUSG00000040264, ENSMUSG00000030748, ENSMUSG00000035692, ENSMUSG00000037379, ENSMUSG00000019787, ENSMUSG00000078853, ENSMUSG00000062488,…	199	1514	19596	2.2114	0.0965109	0.0011663	0.00106581
GOTERM_BP_FAT	GO:0043207~response to external biotic stimulus	34	16.2679	2.25782e-05	ENSMUSG00000049382, ENSMUSG00000032661, ENSMUSG00000032089, ENSMUSG00000033450, ENSMUSG00000021250, ENSMUSG00000046805, ENSMUSG00000054072, ENSMUSG00000023992, ENSMUSG00000002897, ENSMUSG00000027514, ENSMUSG00000040026, ENSMUSG00000021356, ENSMUSG00000044786, ENSMUSG00000040264, ENSMUSG00000030748, ENSMUSG00000035692, ENSMUSG00000037379, ENSMUSG00000019787, ENSMUSG00000078853, ENSMUSG00000062488,…	199	1517	19596	2.20703	0.100235	0.0011865	0.00108426
GOTERM_BP_FAT	GO:0030334~regulation of cell migration	26	12.4402	2.23781e-05	ENSMUSG00000031451, ENSMUSG00000031870, ENSMUSG00000055980, ENSMUSG00000040249, ENSMUSG00000023992, ENSMUSG00000022346, ENSMUSG00000024621, ENSMUSG00000047414, ENSMUSG00000052934, ENSMUSG00000039910, ENSMUSG00000036856, ENSMUSG00000031980, ENSMUSG00000000120, ENSMUSG00000022893, ENSMUSG00000024610, ENSMUSG00000040152, ENSMUSG00000041120, ENSMUSG00000024713, ENSMUSG00000020733, ENSMUSG00000035042,…	199	988	19596	2.59138	0.0993926	0.0011865	0.00108426
GOTERM_BP_FAT	GO:0060759~regulation of response to cytokine stimulus	10	4.78469	2.34669e-05	ENSMUSG00000069874, ENSMUSG00000031451, ENSMUSG00000032661, ENSMUSG00000078853, ENSMUSG00000002602, ENSMUSG00000035692, ENSMUSG00000023992, ENSMUSG00000027514, ENSMUSG00000056427, ENSMUSG00000024610	199	151	19596	6.52135	0.103968	0.00121949	0.00111441
GOTERM_BP_FAT	GO:0048646~anatomical structure formation involved in morphogenesis	30	14.3541	2.6284e-05	ENSMUSG00000049382, ENSMUSG00000017969, ENSMUSG00000057003, ENSMUSG00000023992, ENSMUSG00000020186, ENSMUSG00000015340, ENSMUSG00000021798, ENSMUSG00000068699, ENSMUSG00000030748, ENSMUSG00000016458, ENSMUSG00000090698, ENSMUSG00000074622, ENSMUSG00000031972, ENSMUSG00000039910, ENSMUSG00000036856, ENSMUSG00000037868, ENSMUSG00000031980, ENSMUSG00000048387, ENSMUSG00000000120, ENSMUSG00000006205,…	199	1257	19596	2.35018	0.115699	0.00135088	0.00123448
GOTERM_BP_FAT	GO:0072074~kidney mesenchyme development	5	2.39234	2.76913e-05	ENSMUSG00000036856, ENSMUSG00000048387, ENSMUSG00000016458, ENSMUSG00000045680, ENSMUSG00000022346	199	18	19596	27.3534	0.121502	0.00139757	0.00127715
GOTERM_BP_FAT	GO:0032680~regulation of tumor necrosis factor production	11	5.26316	2.77901e-05	ENSMUSG00000040152, ENSMUSG00000015340, ENSMUSG00000044786, ENSMUSG00000031451, ENSMUSG00000032661, ENSMUSG00000002602, ENSMUSG00000067212, ENSMUSG00000056529, ENSMUSG00000037379, ENSMUSG00000023992, ENSMUSG00000028967	199	193	19596	5.61241	0.121908	0.00139757	0.00127715
GOTERM_BP_FAT	GO:0023014~signal transduction by protein phosphorylation	23	11.0048	2.96428e-05	ENSMUSG00000031451, ENSMUSG00000031980, ENSMUSG00000018849, ENSMUSG00000052397, ENSMUSG00000055254, ENSMUSG00000049112, ENSMUSG00000040249, ENSMUSG00000023992, ENSMUSG00000023046, ENSMUSG00000000120, ENSMUSG00000028967, ENSMUSG00000022346, ENSMUSG00000024621, ENSMUSG00000024610, ENSMUSG00000040152, ENSMUSG00000044786, ENSMUSG00000020733, ENSMUSG00000035042, ENSMUSG00000009185, ENSMUSG00000074345,…	199	819	19596	2.7654	0.129486	0.00145936	0.00133361
GOTERM_BP_FAT	GO:0000165~MAPK cascade	23	11.0048	2.96428e-05	ENSMUSG00000031451, ENSMUSG00000031980, ENSMUSG00000018849, ENSMUSG00000052397, ENSMUSG00000055254, ENSMUSG00000049112, ENSMUSG00000040249, ENSMUSG00000023992, ENSMUSG00000023046, ENSMUSG00000000120, ENSMUSG00000028967, ENSMUSG00000022346, ENSMUSG00000024621, ENSMUSG00000024610, ENSMUSG00000040152, ENSMUSG00000044786, ENSMUSG00000020733, ENSMUSG00000035042, ENSMUSG00000009185, ENSMUSG00000074345,…	199	819	19596	2.7654	0.129486	0.00145936	0.00133361
GOTERM_BP_FAT	GO:1903555~regulation of tumor necrosis factor superfamily cytokine production	11	5.26316	3.1712e-05	ENSMUSG00000040152, ENSMUSG00000015340, ENSMUSG00000044786, ENSMUSG00000031451, ENSMUSG00000032661, ENSMUSG00000002602, ENSMUSG00000067212, ENSMUSG00000056529, ENSMUSG00000037379, ENSMUSG00000023992, ENSMUSG00000028967	199	196	19596	5.52651	0.137872	0.00154497	0.00141184
GOTERM_BP_FAT	GO:0060760~positive regulation of response to cytokine stimulus	7	3.34928	3.45018e-05	ENSMUSG00000069874, ENSMUSG00000031451, ENSMUSG00000078853, ENSMUSG00000002602, ENSMUSG00000023992, ENSMUSG00000027514, ENSMUSG00000024610	199	61	19596	11.3001	0.14905	0.00166356	0.00152021
GOTERM_BP_FAT	GO:1903708~positive regulation of hemopoiesis	12	5.74163	3.70518e-05	ENSMUSG00000031451, ENSMUSG00000002602, ENSMUSG00000036594, ENSMUSG00000035042, ENSMUSG00000086962, ENSMUSG00000030748, ENSMUSG00000035692, ENSMUSG00000037440, ENSMUSG00000021250, ENSMUSG00000023992, ENSMUSG00000024621, ENSMUSG00000024610	199	242	19596	4.88293	0.159141	0.00176828	0.00161591
GOTERM_BP_FAT	GO:0030335~positive regulation of cell migration	19	9.09091	3.76107e-05	ENSMUSG00000031451, ENSMUSG00000031870, ENSMUSG00000031980, ENSMUSG00000055980, ENSMUSG00000040249, ENSMUSG00000023992, ENSMUSG00000022893, ENSMUSG00000022346, ENSMUSG00000024621, ENSMUSG00000024610, ENSMUSG00000040152, ENSMUSG00000024713, ENSMUSG00000035042, ENSMUSG00000056529, ENSMUSG00000038894, ENSMUSG00000017737, ENSMUSG00000052934, ENSMUSG00000032359, ENSMUSG00000018920	199	597	19596	3.13396	0.161337	0.00177682	0.00162372
GOTERM_BP_FAT	GO:0071706~tumor necrosis factor superfamily cytokine production	11	5.26316	4.10736e-05	ENSMUSG00000040152, ENSMUSG00000015340, ENSMUSG00000044786, ENSMUSG00000031451, ENSMUSG00000032661, ENSMUSG00000002602, ENSMUSG00000067212, ENSMUSG00000056529, ENSMUSG00000037379, ENSMUSG00000023992, ENSMUSG00000028967	199	202	19596	5.36236	0.174814	0.00192101	0.00175549
GOTERM_BP_FAT	GO:0019886~antigen processing and presentation of exogenous peptide antigen via MHC class II	5	2.39234	4.31556e-05	ENSMUSG00000036594, ENSMUSG00000073421, ENSMUSG00000038642, ENSMUSG00000060586, ENSMUSG00000024610	199	20	19596	24.6181	0.182812	0.0019984	0.00182621
GOTERM_BP_FAT	GO:0042832~defense response to protozoan	6	2.87081	4.36037e-05	ENSMUSG00000069874, ENSMUSG00000040264, ENSMUSG00000030748, ENSMUSG00000054072, ENSMUSG00000105096, ENSMUSG00000021356	199	39	19596	15.1496	0.184523	0.00199936	0.00182708
GOTERM_BP_FAT	GO:0071346~cellular response to interferon-gamma	9	4.30622	4.52834e-05	ENSMUSG00000069874, ENSMUSG00000029860, ENSMUSG00000040264, ENSMUSG00000078853, ENSMUSG00000035042, ENSMUSG00000009185, ENSMUSG00000073421, ENSMUSG00000105096, ENSMUSG00000022346	199	127	19596	6.97836	0.190906	0.00201857	0.00184464
GOTERM_BP_FAT	GO:0048015~phosphatidylinositol-mediated signaling	10	4.78469	4.49902e-05	ENSMUSG00000031980, ENSMUSG00000020733, ENSMUSG00000052397, ENSMUSG00000035042, ENSMUSG00000055254, ENSMUSG00000055980, ENSMUSG00000056529, ENSMUSG00000023992, ENSMUSG00000024621, ENSMUSG00000025017	199	164	19596	6.00441	0.189796	0.00201857	0.00184464
GOTERM_BP_FAT	GO:0022603~regulation of anatomical structure morphogenesis	28	13.3971	4.54902e-05	ENSMUSG00000052397, ENSMUSG00000017969, ENSMUSG00000057003, ENSMUSG00000040249, ENSMUSG00000023992, ENSMUSG00000022346, ENSMUSG00000024621, ENSMUSG00000015340, ENSMUSG00000021215, ENSMUSG00000030748, ENSMUSG00000016458, ENSMUSG00000052934, ENSMUSG00000039910, ENSMUSG00000036856, ENSMUSG00000031980, ENSMUSG00000055254, ENSMUSG00000048387, ENSMUSG00000000120, ENSMUSG00000022893, ENSMUSG00000025885,…	199	1162	19596	2.37283	0.191689	0.00201857	0.00184464
GOTERM_BP_FAT	GO:0009968~negative regulation of signal transduction	30	14.3541	4.5749e-05	ENSMUSG00000031453, ENSMUSG00000031451, ENSMUSG00000032661, ENSMUSG00000052397, ENSMUSG00000055980, ENSMUSG00000040249, ENSMUSG00000023992, ENSMUSG00000028967, ENSMUSG00000025017, ENSMUSG00000021356, ENSMUSG00000020027, ENSMUSG00000035692, ENSMUSG00000034612, ENSMUSG00000036856, ENSMUSG00000031980, ENSMUSG00000018849, ENSMUSG00000027004, ENSMUSG00000000120, ENSMUSG00000006205, ENSMUSG00000024610,…	199	1296	19596	2.27945	0.192667	0.00201857	0.00184464
GOTERM_BP_FAT	GO:1901701~cellular response to oxygen-containing compound	32	15.311	4.97664e-05	ENSMUSG00000031451, ENSMUSG00000031075, ENSMUSG00000005360, ENSMUSG00000052397, ENSMUSG00000055980, ENSMUSG00000021250, ENSMUSG00000040249, ENSMUSG00000023992, ENSMUSG00000028967, ENSMUSG00000022346, ENSMUSG00000022840, ENSMUSG00000015340, ENSMUSG00000021215, ENSMUSG00000044786, ENSMUSG00000020027, ENSMUSG00000037379, ENSMUSG00000031980, ENSMUSG00000078853, ENSMUSG00000055254, ENSMUSG00000048387,…	199	1439	19596	2.1898	0.207698	0.00212099	0.00193823
GOTERM_BP_FAT	GO:0071363~cellular response to growth factor stimulus	21	10.0478	4.91311e-05	ENSMUSG00000034612, ENSMUSG00000029860, ENSMUSG00000033763, ENSMUSG00000036856, ENSMUSG00000031451, ENSMUSG00000031980, ENSMUSG00000055254, ENSMUSG00000021250, ENSMUSG00000040249, ENSMUSG00000000120, ENSMUSG00000028967, ENSMUSG00000006205, ENSMUSG00000022346, ENSMUSG00000040152, ENSMUSG00000041120, ENSMUSG00000047414, ENSMUSG00000044786, ENSMUSG00000047787, ENSMUSG00000032726, ENSMUSG00000039910,…	199	726	19596	2.84837	0.20534	0.00212099	0.00193823
GOTERM_BP_FAT	GO:0050790~regulation of catalytic activity	41	19.6172	4.97418e-05	ENSMUSG00000031453, ENSMUSG00000034009, ENSMUSG00000031451, ENSMUSG00000032661, ENSMUSG00000055980, ENSMUSG00000040249, ENSMUSG00000023992, ENSMUSG00000028967, ENSMUSG00000022346, ENSMUSG00000042842, ENSMUSG00000024621, ENSMUSG00000021215, ENSMUSG00000044786, ENSMUSG00000089774, ENSMUSG00000074345, ENSMUSG00000057729, ENSMUSG00000039533, ENSMUSG00000036856, ENSMUSG00000033763, ENSMUSG00000031980,…	199	2086	19596	1.93546	0.207607	0.00212099	0.00193823
GOTERM_BP_FAT	GO:0002573~myeloid leukocyte differentiation	12	5.74163	4.98842e-05	ENSMUSG00000035042, ENSMUSG00000021250, ENSMUSG00000023992, ENSMUSG00000057729, ENSMUSG00000074622, ENSMUSG00000073489, ENSMUSG00000036896, ENSMUSG00000039910, ENSMUSG00000022346, ENSMUSG00000024621, ENSMUSG00000024610, ENSMUSG00000021356	199	250	19596	4.72667	0.208135	0.00212099	0.00193823
GOTERM_BP_FAT	GO:0010648~negative regulation of cell communication	32	15.311	5.10779e-05	ENSMUSG00000031453, ENSMUSG00000031451, ENSMUSG00000032661, ENSMUSG00000052397, ENSMUSG00000055980, ENSMUSG00000040249, ENSMUSG00000023992, ENSMUSG00000028967, ENSMUSG00000025017, ENSMUSG00000021356, ENSMUSG00000020027, ENSMUSG00000035692, ENSMUSG00000032726, ENSMUSG00000034612, ENSMUSG00000036856, ENSMUSG00000031980, ENSMUSG00000018849, ENSMUSG00000027004, ENSMUSG00000000120, ENSMUSG00000006205,…	199	1441	19596	2.18676	0.212545	0.00215217	0.00196673
GOTERM_BP_FAT	GO:0035457~cellular response to interferon-alpha	5	2.39234	5.28895e-05	ENSMUSG00000031451, ENSMUSG00000002602, ENSMUSG00000062488, ENSMUSG00000073489, ENSMUSG00000022346	199	21	19596	23.4458	0.21919	0.00219795	0.00200856
GOTERM_BP_FAT	GO:0023057~negative regulation of signaling	32	15.311	5.31041e-05	ENSMUSG00000031453, ENSMUSG00000031451, ENSMUSG00000032661, ENSMUSG00000052397, ENSMUSG00000055980, ENSMUSG00000040249, ENSMUSG00000023992, ENSMUSG00000028967, ENSMUSG00000025017, ENSMUSG00000021356, ENSMUSG00000020027, ENSMUSG00000035692, ENSMUSG00000032726, ENSMUSG00000034612, ENSMUSG00000036856, ENSMUSG00000031980, ENSMUSG00000018849, ENSMUSG00000027004, ENSMUSG00000000120, ENSMUSG00000006205,…	199	1444	19596	2.18221	0.219974	0.00219795	0.00200856
GOTERM_BP_FAT	GO:0098883~synapse disassembly	4	1.91388	5.48132e-05	ENSMUSG00000036905, ENSMUSG00000023992, ENSMUSG00000036896, ENSMUSG00000036887	199	8	19596	49.2362	0.226186	0.00224878	0.00205501
GOTERM_BP_FAT	GO:0019882~antigen processing and presentation	9	4.30622	5.64695e-05	ENSMUSG00000040152, ENSMUSG00000036594, ENSMUSG00000067212, ENSMUSG00000073421, ENSMUSG00000037321, ENSMUSG00000023992, ENSMUSG00000038642, ENSMUSG00000060586, ENSMUSG00000024610	199	131	19596	6.76528	0.232158	0.00229659	0.0020987
GOTERM_BP_FAT	GO:2000145~regulation of cell motility	26	12.4402	5.86572e-05	ENSMUSG00000031451, ENSMUSG00000031870, ENSMUSG00000055980, ENSMUSG00000040249, ENSMUSG00000023992, ENSMUSG00000022346, ENSMUSG00000024621, ENSMUSG00000047414, ENSMUSG00000052934, ENSMUSG00000039910, ENSMUSG00000036856, ENSMUSG00000031980, ENSMUSG00000000120, ENSMUSG00000022893, ENSMUSG00000024610, ENSMUSG00000040152, ENSMUSG00000041120, ENSMUSG00000024713, ENSMUSG00000020733, ENSMUSG00000035042,…	199	1048	19596	2.44302	0.239977	0.00230404	0.00210551
GOTERM_BP_FAT	GO:1903706~regulation of hemopoiesis	16	7.6555	5.72361e-05	ENSMUSG00000031451, ENSMUSG00000086962, ENSMUSG00000021250, ENSMUSG00000023992, ENSMUSG00000022346, ENSMUSG00000024621, ENSMUSG00000024610, ENSMUSG00000044786, ENSMUSG00000002602, ENSMUSG00000036594, ENSMUSG00000035042, ENSMUSG00000030748, ENSMUSG00000035692, ENSMUSG00000037440, ENSMUSG00000074622, ENSMUSG00000036896	199	451	19596	3.49348	0.234907	0.00230404	0.00210551
GOTERM_BP_FAT	GO:0045937~positive regulation of phosphate metabolic process	29	13.8756	5.91159e-05	ENSMUSG00000034009, ENSMUSG00000031451, ENSMUSG00000054675, ENSMUSG00000086962, ENSMUSG00000055980, ENSMUSG00000040249, ENSMUSG00000023992, ENSMUSG00000022346, ENSMUSG00000024621, ENSMUSG00000032726, ENSMUSG00000074345, ENSMUSG00000039533, ENSMUSG00000031980, ENSMUSG00000028871, ENSMUSG00000018849, ENSMUSG00000078853, ENSMUSG00000055254, ENSMUSG00000023046, ENSMUSG00000000120, ENSMUSG00000024610,…	199	1247	19596	2.29005	0.241606	0.00230404	0.00210551
GOTERM_BP_FAT	GO:0014911~positive regulation of smooth muscle cell migration	7	3.34928	5.89737e-05	ENSMUSG00000031980, ENSMUSG00000024713, ENSMUSG00000031870, ENSMUSG00000035042, ENSMUSG00000040249, ENSMUSG00000022893, ENSMUSG00000022346	199	67	19596	10.2882	0.241101	0.00230404	0.00210551
GOTERM_BP_FAT	GO:0010562~positive regulation of phosphorus metabolic process	29	13.8756	5.91159e-05	ENSMUSG00000034009, ENSMUSG00000031451, ENSMUSG00000054675, ENSMUSG00000086962, ENSMUSG00000055980, ENSMUSG00000040249, ENSMUSG00000023992, ENSMUSG00000022346, ENSMUSG00000024621, ENSMUSG00000032726, ENSMUSG00000074345, ENSMUSG00000039533, ENSMUSG00000031980, ENSMUSG00000028871, ENSMUSG00000018849, ENSMUSG00000078853, ENSMUSG00000055254, ENSMUSG00000023046, ENSMUSG00000000120, ENSMUSG00000024610,…	199	1247	19596	2.29005	0.241606	0.00230404	0.00210551
GOTERM_BP_FAT	GO:0043065~positive regulation of apoptotic process	20	9.56938	6.58958e-05	ENSMUSG00000031980, ENSMUSG00000024042, ENSMUSG00000017969, ENSMUSG00000027004, ENSMUSG00000027322, ENSMUSG00000000120, ENSMUSG00000006205, ENSMUSG00000022346, ENSMUSG00000027514, ENSMUSG00000040152, ENSMUSG00000021215, ENSMUSG00000038393, ENSMUSG00000020733, ENSMUSG00000070034, ENSMUSG00000035042, ENSMUSG00000016458, ENSMUSG00000017737, ENSMUSG00000034892, ENSMUSG00000032359, ENSMUSG00000037820	199	682	19596	2.88775	0.265284	0.00254706	0.00232759
GOTERM_BP_FAT	GO:2000147~positive regulation of cell motility	19	9.09091	6.64482e-05	ENSMUSG00000031451, ENSMUSG00000031870, ENSMUSG00000031980, ENSMUSG00000055980, ENSMUSG00000040249, ENSMUSG00000023992, ENSMUSG00000022893, ENSMUSG00000022346, ENSMUSG00000024621, ENSMUSG00000024610, ENSMUSG00000040152, ENSMUSG00000024713, ENSMUSG00000035042, ENSMUSG00000056529, ENSMUSG00000038894, ENSMUSG00000017737, ENSMUSG00000052934, ENSMUSG00000032359, ENSMUSG00000018920	199	624	19596	2.99836	0.26718	0.00254736	0.00232787
GOTERM_BP_FAT	GO:0040011~locomotion	40	19.1388	6.73507e-05	ENSMUSG00000031451, ENSMUSG00000031870, ENSMUSG00000055980, ENSMUSG00000040249, ENSMUSG00000023992, ENSMUSG00000002897, ENSMUSG00000022346, ENSMUSG00000040026, ENSMUSG00000024621, ENSMUSG00000047414, ENSMUSG00000021215, ENSMUSG00000016458, ENSMUSG00000057729, ENSMUSG00000052934, ENSMUSG00000039910, ENSMUSG00000036856, ENSMUSG00000037868, ENSMUSG00000031980, ENSMUSG00000018849, ENSMUSG00000055254,…	199	2040	19596	1.93083	0.270267	0.00256097	0.0023403
GOTERM_BP_FAT	GO:0048585~negative regulation of response to stimulus	36	17.2249	6.84111e-05	ENSMUSG00000031453, ENSMUSG00000031451, ENSMUSG00000032661, ENSMUSG00000052397, ENSMUSG00000017969, ENSMUSG00000055980, ENSMUSG00000040249, ENSMUSG00000023992, ENSMUSG00000028967, ENSMUSG00000025017, ENSMUSG00000021356, ENSMUSG00000044786, ENSMUSG00000020027, ENSMUSG00000030748, ENSMUSG00000035692, ENSMUSG00000034612, ENSMUSG00000036856, ENSMUSG00000031980, ENSMUSG00000018849, ENSMUSG00000027004,…	199	1748	19596	2.02803	0.273878	0.00258031	0.00235797
GOTERM_BP_FAT	GO:0001562~response to protozoan	6	2.87081	7.05523e-05	ENSMUSG00000069874, ENSMUSG00000040264, ENSMUSG00000030748, ENSMUSG00000054072, ENSMUSG00000105096, ENSMUSG00000021356	199	43	19596	13.7403	0.281116	0.00263978	0.00241232
GOTERM_BP_FAT	GO:0043068~positive regulation of programmed cell death	20	9.56938	7.25715e-05	ENSMUSG00000031980, ENSMUSG00000024042, ENSMUSG00000017969, ENSMUSG00000027004, ENSMUSG00000027322, ENSMUSG00000000120, ENSMUSG00000006205, ENSMUSG00000022346, ENSMUSG00000027514, ENSMUSG00000040152, ENSMUSG00000021215, ENSMUSG00000038393, ENSMUSG00000020733, ENSMUSG00000070034, ENSMUSG00000035042, ENSMUSG00000016458, ENSMUSG00000017737, ENSMUSG00000034892, ENSMUSG00000032359, ENSMUSG00000037820	199	687	19596	2.86674	0.287875	0.00269378	0.00246167
GOTERM_BP_FAT	GO:0030239~myofibril assembly	7	3.34928	7.55627e-05	ENSMUSG00000021798, ENSMUSG00000049382, ENSMUSG00000068699, ENSMUSG00000020911, ENSMUSG00000057003, ENSMUSG00000020186, ENSMUSG00000031972	199	70	19596	9.84724	0.297771	0.00278273	0.00254295
GOTERM_BP_FAT	GO:0048545~response to steroid hormone	14	6.69856	8.1926e-05	ENSMUSG00000031870, ENSMUSG00000055254, ENSMUSG00000049112, ENSMUSG00000021250, ENSMUSG00000033161, ENSMUSG00000028967, ENSMUSG00000015340, ENSMUSG00000044786, ENSMUSG00000019970, ENSMUSG00000038393, ENSMUSG00000056529, ENSMUSG00000045680, ENSMUSG00000031972, ENSMUSG00000056427	199	361	19596	3.81887	0.318368	0.0029935	0.00273556
GOTERM_BP_FAT	GO:0070848~response to growth factor	21	10.0478	8.41032e-05	ENSMUSG00000034612, ENSMUSG00000029860, ENSMUSG00000033763, ENSMUSG00000036856, ENSMUSG00000031451, ENSMUSG00000031980, ENSMUSG00000055254, ENSMUSG00000021250, ENSMUSG00000040249, ENSMUSG00000000120, ENSMUSG00000028967, ENSMUSG00000006205, ENSMUSG00000022346, ENSMUSG00000040152, ENSMUSG00000041120, ENSMUSG00000047414, ENSMUSG00000044786, ENSMUSG00000047787, ENSMUSG00000032726, ENSMUSG00000039910,…	199	755	19596	2.73897	0.325276	0.00304923	0.00278649
GOTERM_BP_FAT	GO:0051270~regulation of cellular component movement	27	12.9187	8.64394e-05	ENSMUSG00000031451, ENSMUSG00000031870, ENSMUSG00000055980, ENSMUSG00000040249, ENSMUSG00000023992, ENSMUSG00000022346, ENSMUSG00000024621, ENSMUSG00000047414, ENSMUSG00000052934, ENSMUSG00000039910, ENSMUSG00000036856, ENSMUSG00000031980, ENSMUSG00000033161, ENSMUSG00000000120, ENSMUSG00000022893, ENSMUSG00000024610, ENSMUSG00000040152, ENSMUSG00000041120, ENSMUSG00000024713, ENSMUSG00000020733,…	199	1140	19596	2.33224	0.33261	0.00310982	0.00284186
GOTERM_BP_FAT	GO:0042327~positive regulation of phosphorylation	27	12.9187	9.4125e-05	ENSMUSG00000031451, ENSMUSG00000054675, ENSMUSG00000086962, ENSMUSG00000055980, ENSMUSG00000040249, ENSMUSG00000023992, ENSMUSG00000022346, ENSMUSG00000024621, ENSMUSG00000032726, ENSMUSG00000074345, ENSMUSG00000039533, ENSMUSG00000031980, ENSMUSG00000028871, ENSMUSG00000018849, ENSMUSG00000078853, ENSMUSG00000055254, ENSMUSG00000023046, ENSMUSG00000000120, ENSMUSG00000024610, ENSMUSG00000040152,…	199	1146	19596	2.32003	0.356181	0.00336048	0.00307092
GOTERM_BP_FAT	GO:0051272~positive regulation of cellular component movement	19	9.09091	9.52384e-05	ENSMUSG00000031451, ENSMUSG00000031870, ENSMUSG00000031980, ENSMUSG00000055980, ENSMUSG00000040249, ENSMUSG00000023992, ENSMUSG00000022893, ENSMUSG00000022346, ENSMUSG00000024621, ENSMUSG00000024610, ENSMUSG00000040152, ENSMUSG00000024713, ENSMUSG00000035042, ENSMUSG00000056529, ENSMUSG00000038894, ENSMUSG00000017737, ENSMUSG00000052934, ENSMUSG00000032359, ENSMUSG00000018920	199	642	19596	2.91429	0.359526	0.00337447	0.00308371
GOTERM_BP_FAT	GO:0035556~intracellular signal transduction	48	22.9665	0.000100363	ENSMUSG00000031453, ENSMUSG00000030222, ENSMUSG00000031451, ENSMUSG00000032661, ENSMUSG00000032089, ENSMUSG00000024042, ENSMUSG00000052397, ENSMUSG00000055980, ENSMUSG00000040249, ENSMUSG00000023992, ENSMUSG00000028967, ENSMUSG00000022346, ENSMUSG00000040026, ENSMUSG00000022840, ENSMUSG00000025017, ENSMUSG00000024621, ENSMUSG00000021215, ENSMUSG00000044786, ENSMUSG00000020027, ENSMUSG00000074345,…	199	2694	19596	1.75452	0.374699	0.0035293	0.0032252
GOTERM_BP_FAT	GO:0009628~response to abiotic stimulus	30	14.3541	0.000107169	ENSMUSG00000031453, ENSMUSG00000049382, ENSMUSG00000031075, ENSMUSG00000024042, ENSMUSG00000005360, ENSMUSG00000017969, ENSMUSG00000021250, ENSMUSG00000028967, ENSMUSG00000022346, ENSMUSG00000042842, ENSMUSG00000015340, ENSMUSG00000021215, ENSMUSG00000020704, ENSMUSG00000090698, ENSMUSG00000038642, ENSMUSG00000031972, ENSMUSG00000039910, ENSMUSG00000031980, ENSMUSG00000006221, ENSMUSG00000032374,…	199	1360	19596	2.17218	0.394297	0.00374053	0.00341822
GOTERM_BP_FAT	GO:0006928~movement of cell or subcellular component	42	20.0957	0.000113637	ENSMUSG00000031451, ENSMUSG00000031870, ENSMUSG00000055980, ENSMUSG00000040249, ENSMUSG00000023992, ENSMUSG00000002897, ENSMUSG00000022346, ENSMUSG00000040026, ENSMUSG00000024621, ENSMUSG00000047414, ENSMUSG00000021215, ENSMUSG00000016458, ENSMUSG00000057729, ENSMUSG00000052934, ENSMUSG00000039910, ENSMUSG00000036856, ENSMUSG00000037868, ENSMUSG00000031980, ENSMUSG00000018849, ENSMUSG00000055254,…	199	2242	19596	1.84471	0.412352	0.00393691	0.00359768
GOTERM_BP_FAT	GO:0043277~apoptotic cell clearance	6	2.87081	0.000120474	ENSMUSG00000040152, ENSMUSG00000031451, ENSMUSG00000002602, ENSMUSG00000040249, ENSMUSG00000023992, ENSMUSG00000037820	199	48	19596	12.309	0.430849	0.00414305	0.00378606
GOTERM_BP_FAT	GO:0040017~positive regulation of locomotion	19	9.09091	0.000129556	ENSMUSG00000031451, ENSMUSG00000031870, ENSMUSG00000031980, ENSMUSG00000055980, ENSMUSG00000040249, ENSMUSG00000023992, ENSMUSG00000022893, ENSMUSG00000022346, ENSMUSG00000024621, ENSMUSG00000024610, ENSMUSG00000040152, ENSMUSG00000024713, ENSMUSG00000035042, ENSMUSG00000056529, ENSMUSG00000038894, ENSMUSG00000017737, ENSMUSG00000052934, ENSMUSG00000032359, ENSMUSG00000018920	199	658	19596	2.84343	0.454527	0.00442286	0.00404176
GOTERM_BP_FAT	GO:0065009~regulation of molecular function	49	23.445	0.000130742	ENSMUSG00000017969, ENSMUSG00000024621, ENSMUSG00000042842, ENSMUSG00000021356, ENSMUSG00000044786, ENSMUSG00000089774, ENSMUSG00000020704, ENSMUSG00000019787, ENSMUSG00000033763, ENSMUSG00000031980, ENSMUSG00000055254, ENSMUSG00000023046, ENSMUSG00000024610, ENSMUSG00000020733, ENSMUSG00000002602, ENSMUSG00000038894, ENSMUSG00000030854, ENSMUSG00000017737, ENSMUSG00000034652, ENSMUSG00000032359,…	199	2803	19596	1.72142	0.457546	0.00443103	0.00404922
GOTERM_BP_FAT	GO:0032640~tumor necrosis factor production	10	4.78469	0.000133848	ENSMUSG00000040152, ENSMUSG00000015340, ENSMUSG00000031451, ENSMUSG00000032661, ENSMUSG00000002602, ENSMUSG00000067212, ENSMUSG00000056529, ENSMUSG00000037379, ENSMUSG00000023992, ENSMUSG00000028967	199	189	19596	5.21018	0.46537	0.00450364	0.00411557
GOTERM_BP_FAT	GO:0045785~positive regulation of cell adhesion	16	7.6555	0.000137667	ENSMUSG00000036856, ENSMUSG00000058297, ENSMUSG00000060586, ENSMUSG00000024610, ENSMUSG00000040152, ENSMUSG00000021215, ENSMUSG00000024713, ENSMUSG00000036594, ENSMUSG00000035042, ENSMUSG00000030748, ENSMUSG00000067212, ENSMUSG00000037440, ENSMUSG00000056529, ENSMUSG00000073421, ENSMUSG00000037820, ENSMUSG00000039910	199	488	19596	3.2286	0.474839	0.00459906	0.00420278
GOTERM_BP_FAT	GO:0050900~leukocyte migration	14	6.69856	0.000159102	ENSMUSG00000031451, ENSMUSG00000023992, ENSMUSG00000002897, ENSMUSG00000024621, ENSMUSG00000024610, ENSMUSG00000040152, ENSMUSG00000041120, ENSMUSG00000035042, ENSMUSG00000009185, ENSMUSG00000056529, ENSMUSG00000017737, ENSMUSG00000057729, ENSMUSG00000034652, ENSMUSG00000018920	199	386	19596	3.57154	0.524951	0.00523809	0.00478674
GOTERM_BP_FAT	GO:0045637~regulation of myeloid cell differentiation	11	5.26316	0.000160155	ENSMUSG00000044786, ENSMUSG00000035042, ENSMUSG00000086962, ENSMUSG00000035692, ENSMUSG00000021250, ENSMUSG00000023992, ENSMUSG00000074622, ENSMUSG00000036896, ENSMUSG00000022346, ENSMUSG00000024621, ENSMUSG00000024610	199	238	19596	4.55124	0.527287	0.00523809	0.00478674
GOTERM_BP_FAT	GO:0032642~regulation of chemokine production	8	3.82775	0.000159833	ENSMUSG00000032661, ENSMUSG00000035042, ENSMUSG00000030748, ENSMUSG00000040249, ENSMUSG00000023992, ENSMUSG00000002897, ENSMUSG00000024621, ENSMUSG00000024610	199	114	19596	6.91034	0.526574	0.00523809	0.00478674
GOTERM_BP_FAT	GO:1902105~regulation of leukocyte differentiation	13	6.2201	0.000162267	ENSMUSG00000031451, ENSMUSG00000021250, ENSMUSG00000023992, ENSMUSG00000022346, ENSMUSG00000024621, ENSMUSG00000024610, ENSMUSG00000002602, ENSMUSG00000036594, ENSMUSG00000035042, ENSMUSG00000030748, ENSMUSG00000037440, ENSMUSG00000074622, ENSMUSG00000036896	199	335	19596	3.82132	0.531935	0.0052703	0.00481618
GOTERM_BP_FAT	GO:0048468~cell development	47	22.488	0.000170848	ENSMUSG00000040829, ENSMUSG00000049382, ENSMUSG00000031870, ENSMUSG00000005360, ENSMUSG00000052397, ENSMUSG00000057003, ENSMUSG00000040249, ENSMUSG00000023992, ENSMUSG00000020186, ENSMUSG00000022346, ENSMUSG00000024621, ENSMUSG00000047414, ENSMUSG00000021798, ENSMUSG00000021215, ENSMUSG00000020027, ENSMUSG00000068699, ENSMUSG00000016458, ENSMUSG00000032726, ENSMUSG00000039533, ENSMUSG00000052934,…	199	2675	19596	1.73017	0.550354	0.00551072	0.00503588
GOTERM_BP_FAT	GO:0006811~ion transport	34	16.2679	0.000176447	ENSMUSG00000031451, ENSMUSG00000055489, ENSMUSG00000031075, ENSMUSG00000024042, ENSMUSG00000005360, ENSMUSG00000027574, ENSMUSG00000023992, ENSMUSG00000022346, ENSMUSG00000015340, ENSMUSG00000027716, ENSMUSG00000050856, ENSMUSG00000089774, ENSMUSG00000020704, ENSMUSG00000074345, ENSMUSG00000032725, ENSMUSG00000034320, ENSMUSG00000038642, ENSMUSG00000019787, ENSMUSG00000031980, ENSMUSG00000055254,…	199	1687	19596	1.98462	0.561981	0.00565235	0.00516531
GOTERM_BP_FAT	GO:0048661~positive regulation of smooth muscle cell proliferation	8	3.82775	0.000187814	ENSMUSG00000040152, ENSMUSG00000031980, ENSMUSG00000035042, ENSMUSG00000056529, ENSMUSG00000017737, ENSMUSG00000022893, ENSMUSG00000037820, ENSMUSG00000022346	199	117	19596	6.73315	0.584668	0.00593519	0.00542377
GOTERM_BP_FAT	GO:0032602~chemokine production	8	3.82775	0.000187814	ENSMUSG00000032661, ENSMUSG00000035042, ENSMUSG00000030748, ENSMUSG00000040249, ENSMUSG00000023992, ENSMUSG00000002897, ENSMUSG00000024621, ENSMUSG00000024610	199	117	19596	6.73315	0.584668	0.00593519	0.00542377
GOTERM_BP_FAT	GO:1902107~positive regulation of leukocyte differentiation	10	4.78469	0.000197315	ENSMUSG00000031451, ENSMUSG00000002602, ENSMUSG00000036594, ENSMUSG00000035042, ENSMUSG00000030748, ENSMUSG00000037440, ENSMUSG00000021250, ENSMUSG00000023992, ENSMUSG00000024621, ENSMUSG00000024610	199	199	19596	4.94836	0.602726	0.00615228	0.00562216
GOTERM_BP_FAT	GO:1901654~response to ketone	12	5.74163	0.000196942	ENSMUSG00000040152, ENSMUSG00000015340, ENSMUSG00000031451, ENSMUSG00000019970, ENSMUSG00000038393, ENSMUSG00000049112, ENSMUSG00000056529, ENSMUSG00000021250, ENSMUSG00000028967, ENSMUSG00000022346, ENSMUSG00000022840, ENSMUSG00000056427	199	292	19596	4.04681	0.602033	0.00615228	0.00562216
GOTERM_BP_FAT	GO:0043066~negative regulation of apoptotic process	25	11.9617	0.000208637	ENSMUSG00000031451, ENSMUSG00000031870, ENSMUSG00000040249, ENSMUSG00000023992, ENSMUSG00000022346, ENSMUSG00000024621, ENSMUSG00000020704, ENSMUSG00000016458, ENSMUSG00000039910, ENSMUSG00000034612, ENSMUSG00000036856, ENSMUSG00000031980, ENSMUSG00000055254, ENSMUSG00000048387, ENSMUSG00000062488, ENSMUSG00000000120, ENSMUSG00000024610, ENSMUSG00000040152, ENSMUSG00000019970, ENSMUSG00000002602,…	199	1069	19596	2.30291	0.623225	0.00637776	0.00582821
GOTERM_BP_FAT	GO:0040012~regulation of locomotion	26	12.4402	0.000207366	ENSMUSG00000031451, ENSMUSG00000031870, ENSMUSG00000055980, ENSMUSG00000040249, ENSMUSG00000023992, ENSMUSG00000022346, ENSMUSG00000024621, ENSMUSG00000047414, ENSMUSG00000052934, ENSMUSG00000039910, ENSMUSG00000036856, ENSMUSG00000031980, ENSMUSG00000000120, ENSMUSG00000022893, ENSMUSG00000024610, ENSMUSG00000040152, ENSMUSG00000041120, ENSMUSG00000024713, ENSMUSG00000020733, ENSMUSG00000035042,…	199	1136	19596	2.25377	0.620978	0.00637776	0.00582821
GOTERM_BP_FAT	GO:0014812~muscle cell migration	8	3.82775	0.000208574	ENSMUSG00000021215, ENSMUSG00000031980, ENSMUSG00000024713, ENSMUSG00000031870, ENSMUSG00000035042, ENSMUSG00000040249, ENSMUSG00000022893, ENSMUSG00000022346	199	119	19596	6.61999	0.623114	0.00637776	0.00582821
GOTERM_BP_FAT	GO:0051241~negative regulation of multicellular organismal process	30	14.3541	0.000211143	ENSMUSG00000006014, ENSMUSG00000031451, ENSMUSG00000032661, ENSMUSG00000054675, ENSMUSG00000052397, ENSMUSG00000040249, ENSMUSG00000023992, ENSMUSG00000028967, ENSMUSG00000022346, ENSMUSG00000044786, ENSMUSG00000020027, ENSMUSG00000030748, ENSMUSG00000016458, ENSMUSG00000074622, ENSMUSG00000039910, ENSMUSG00000036856, ENSMUSG00000031980, ENSMUSG00000018849, ENSMUSG00000049112, ENSMUSG00000048387,…	199	1415	19596	2.08775	0.627617	0.00640587	0.0058539
GOTERM_BP_FAT	GO:0030099~myeloid cell differentiation	15	7.17703	0.000212296	ENSMUSG00000086962, ENSMUSG00000021250, ENSMUSG00000023992, ENSMUSG00000022346, ENSMUSG00000021356, ENSMUSG00000024621, ENSMUSG00000024610, ENSMUSG00000044786, ENSMUSG00000035042, ENSMUSG00000035692, ENSMUSG00000073489, ENSMUSG00000057729, ENSMUSG00000074622, ENSMUSG00000036896, ENSMUSG00000039910	199	452	19596	3.26789	0.62962	0.00640587	0.0058539
GOTERM_BP_FAT	GO:0032722~positive regulation of chemokine production	7	3.34928	0.00023707	ENSMUSG00000032661, ENSMUSG00000035042, ENSMUSG00000030748, ENSMUSG00000040249, ENSMUSG00000002897, ENSMUSG00000024621, ENSMUSG00000024610	199	86	19596	8.01519	0.670158	0.00710753	0.0064951
GOTERM_BP_FAT	GO:0098656~anion transmembrane transport	10	4.78469	0.000245942	ENSMUSG00000040152, ENSMUSG00000031980, ENSMUSG00000055489, ENSMUSG00000005360, ENSMUSG00000031075, ENSMUSG00000056529, ENSMUSG00000048387, ENSMUSG00000034320, ENSMUSG00000038894, ENSMUSG00000022346	199	205	19596	4.80353	0.683572	0.00732658	0.00669527
GOTERM_BP_FAT	GO:0051146~striated muscle cell differentiation	13	6.2201	0.000260631	ENSMUSG00000049382, ENSMUSG00000054675, ENSMUSG00000031980, ENSMUSG00000024042, ENSMUSG00000057003, ENSMUSG00000020186, ENSMUSG00000021798, ENSMUSG00000068699, ENSMUSG00000020911, ENSMUSG00000030748, ENSMUSG00000009185, ENSMUSG00000016458, ENSMUSG00000031972	199	353	19596	3.62646	0.70459	0.007715	0.00705023
GOTERM_BP_FAT	GO:0007169~transmembrane receptor protein tyrosine kinase signaling pathway	17	8.13397	0.000265577	ENSMUSG00000036856, ENSMUSG00000031980, ENSMUSG00000055254, ENSMUSG00000055980, ENSMUSG00000040249, ENSMUSG00000000120, ENSMUSG00000028967, ENSMUSG00000024621, ENSMUSG00000040152, ENSMUSG00000047414, ENSMUSG00000020027, ENSMUSG00000047787, ENSMUSG00000038393, ENSMUSG00000020733, ENSMUSG00000002602, ENSMUSG00000038894, ENSMUSG00000017737	199	577	19596	2.90127	0.711348	0.00781197	0.00713884
GOTERM_BP_FAT	GO:0060548~negative regulation of cell death	27	12.9187	0.000273965	ENSMUSG00000031451, ENSMUSG00000031870, ENSMUSG00000040249, ENSMUSG00000023992, ENSMUSG00000022346, ENSMUSG00000027656, ENSMUSG00000024621, ENSMUSG00000020704, ENSMUSG00000016458, ENSMUSG00000039910, ENSMUSG00000034612, ENSMUSG00000036856, ENSMUSG00000031980, ENSMUSG00000026077, ENSMUSG00000055254, ENSMUSG00000048387, ENSMUSG00000062488, ENSMUSG00000000120, ENSMUSG00000024610, ENSMUSG00000040152,…	199	1226	19596	2.16864	0.722459	0.00796467	0.00727838
GOTERM_BP_FAT	GO:0010243~response to organonitrogen compound	25	11.9617	0.000274174	ENSMUSG00000031870, ENSMUSG00000031075, ENSMUSG00000005360, ENSMUSG00000052397, ENSMUSG00000055980, ENSMUSG00000021250, ENSMUSG00000040249, ENSMUSG00000023992, ENSMUSG00000028967, ENSMUSG00000022346, ENSMUSG00000015340, ENSMUSG00000020027, ENSMUSG00000027716, ENSMUSG00000031972, ENSMUSG00000037868, ENSMUSG00000031980, ENSMUSG00000055254, ENSMUSG00000049112, ENSMUSG00000000120, ENSMUSG00000019970,…	199	1089	19596	2.26061	0.72273	0.00796467	0.00727838
GOTERM_BP_FAT	GO:0043069~negative regulation of programmed cell death	25	11.9617	0.000277883	ENSMUSG00000031451, ENSMUSG00000031870, ENSMUSG00000040249, ENSMUSG00000023992, ENSMUSG00000022346, ENSMUSG00000024621, ENSMUSG00000020704, ENSMUSG00000016458, ENSMUSG00000039910, ENSMUSG00000034612, ENSMUSG00000036856, ENSMUSG00000031980, ENSMUSG00000055254, ENSMUSG00000048387, ENSMUSG00000062488, ENSMUSG00000000120, ENSMUSG00000024610, ENSMUSG00000040152, ENSMUSG00000019970, ENSMUSG00000002602,…	199	1090	19596	2.25854	0.7275	0.00802259	0.00733131
GOTERM_BP_FAT	GO:0048511~rhythmic process	14	6.69856	0.000287248	ENSMUSG00000037868, ENSMUSG00000031870, ENSMUSG00000031980, ENSMUSG00000024042, ENSMUSG00000026077, ENSMUSG00000048087, ENSMUSG00000055254, ENSMUSG00000049112, ENSMUSG00000027597, ENSMUSG00000000120, ENSMUSG00000022893, ENSMUSG00000022346, ENSMUSG00000002602, ENSMUSG00000056427	199	410	19596	3.36247	0.739184	0.00824207	0.00753188
GOTERM_BP_FAT	GO:1903959~regulation of anion transmembrane transport	5	2.39234	0.000291327	ENSMUSG00000040152, ENSMUSG00000031980, ENSMUSG00000056529, ENSMUSG00000048387, ENSMUSG00000038894	199	32	19596	15.3863	0.744115	0.00830815	0.00759226
GOTERM_BP_FAT	GO:0071396~cellular response to lipid	20	9.56938	0.000302946	ENSMUSG00000031870, ENSMUSG00000078853, ENSMUSG00000055254, ENSMUSG00000055980, ENSMUSG00000048387, ENSMUSG00000033161, ENSMUSG00000023992, ENSMUSG00000028967, ENSMUSG00000022346, ENSMUSG00000022840, ENSMUSG00000069874, ENSMUSG00000044786, ENSMUSG00000019970, ENSMUSG00000002602, ENSMUSG00000035042, ENSMUSG00000056529, ENSMUSG00000045680, ENSMUSG00000037379, ENSMUSG00000105096, ENSMUSG00000018920	199	768	19596	2.56438	0.757656	0.00858714	0.00784722
GOTERM_BP_FAT	GO:0009615~response to virus	13	6.2201	0.00033924	ENSMUSG00000032661, ENSMUSG00000078853, ENSMUSG00000033450, ENSMUSG00000062488, ENSMUSG00000002897, ENSMUSG00000006205, ENSMUSG00000027514, ENSMUSG00000069874, ENSMUSG00000040264, ENSMUSG00000035042, ENSMUSG00000035692, ENSMUSG00000037379, ENSMUSG00000073489	199	363	19596	3.52656	0.79551	0.009558	0.00873442
GOTERM_BP_FAT	GO:0006468~protein phosphorylation	37	17.7033	0.000346127	ENSMUSG00000031451, ENSMUSG00000054675, ENSMUSG00000024042, ENSMUSG00000052397, ENSMUSG00000086962, ENSMUSG00000040249, ENSMUSG00000023992, ENSMUSG00000028967, ENSMUSG00000022346, ENSMUSG00000040026, ENSMUSG00000024621, ENSMUSG00000044786, ENSMUSG00000032726, ENSMUSG00000074345, ENSMUSG00000039533, ENSMUSG00000031980, ENSMUSG00000028871, ENSMUSG00000018849, ENSMUSG00000078853, ENSMUSG00000055254,…	199	1976	19596	1.84387	0.801994	0.00969362	0.00885835
GOTERM_BP_FAT	GO:0032870~cellular response to hormone stimulus	17	8.13397	0.000352714	ENSMUSG00000034009, ENSMUSG00000031870, ENSMUSG00000031980, ENSMUSG00000055254, ENSMUSG00000055980, ENSMUSG00000021250, ENSMUSG00000033161, ENSMUSG00000028967, ENSMUSG00000022346, ENSMUSG00000044786, ENSMUSG00000020027, ENSMUSG00000019970, ENSMUSG00000016458, ENSMUSG00000045680, ENSMUSG00000038894, ENSMUSG00000038642, ENSMUSG00000056427	199	592	19596	2.82775	0.808005	0.0098193	0.00897321
GOTERM_BP_FAT	GO:0035455~response to interferon-alpha	5	2.39234	0.000369833	ENSMUSG00000031451, ENSMUSG00000002602, ENSMUSG00000062488, ENSMUSG00000073489, ENSMUSG00000022346	199	34	19596	14.4812	0.822786	0.010235	0.00935305
GOTERM_BP_FAT	GO:0048608~reproductive structure development	16	7.6555	0.000389538	ENSMUSG00000036856, ENSMUSG00000049382, ENSMUSG00000031870, ENSMUSG00000031980, ENSMUSG00000017969, ENSMUSG00000048387, ENSMUSG00000022893, ENSMUSG00000006205, ENSMUSG00000022346, ENSMUSG00000042842, ENSMUSG00000002602, ENSMUSG00000020911, ENSMUSG00000016458, ENSMUSG00000045680, ENSMUSG00000039910, ENSMUSG00000056427	199	538	19596	2.92855	0.838398	0.0106931	0.00977173
GOTERM_BP_FAT	GO:0043269~regulation of ion transport	20	9.56938	0.000390961	ENSMUSG00000031980, ENSMUSG00000024042, ENSMUSG00000027574, ENSMUSG00000048387, ENSMUSG00000033161, ENSMUSG00000023992, ENSMUSG00000040152, ENSMUSG00000015340, ENSMUSG00000019970, ENSMUSG00000027716, ENSMUSG00000020733, ENSMUSG00000035042, ENSMUSG00000020704, ENSMUSG00000056529, ENSMUSG00000038894, ENSMUSG00000017737, ENSMUSG00000038642, ENSMUSG00000034652, ENSMUSG00000019787, ENSMUSG00000030730	199	784	19596	2.51205	0.83947	0.0106931	0.00977173
GOTERM_BP_FAT	GO:0090183~regulation of kidney development	6	2.87081	0.000406134	ENSMUSG00000036856, ENSMUSG00000031980, ENSMUSG00000048387, ENSMUSG00000016458, ENSMUSG00000017737, ENSMUSG00000022346	199	62	19596	9.52958	0.850473	0.0110435	0.010092
GOTERM_BP_FAT	GO:0008285~negative regulation of cell proliferation	20	9.56938	0.000422688	ENSMUSG00000030222, ENSMUSG00000031980, ENSMUSG00000021390, ENSMUSG00000023992, ENSMUSG00000027004, ENSMUSG00000062488, ENSMUSG00000000120, ENSMUSG00000041202, ENSMUSG00000022346, ENSMUSG00000027656, ENSMUSG00000024621, ENSMUSG00000040152, ENSMUSG00000020733, ENSMUSG00000036594, ENSMUSG00000016458, ENSMUSG00000073421, ENSMUSG00000017737, ENSMUSG00000034652, ENSMUSG00000039910, ENSMUSG00000056427	199	789	19596	2.49613	0.86162	0.0114272	0.0104426
GOTERM_BP_FAT	GO:0061458~reproductive system development	16	7.6555	0.000431998	ENSMUSG00000036856, ENSMUSG00000049382, ENSMUSG00000031870, ENSMUSG00000031980, ENSMUSG00000017969, ENSMUSG00000048387, ENSMUSG00000022893, ENSMUSG00000006205, ENSMUSG00000022346, ENSMUSG00000042842, ENSMUSG00000002602, ENSMUSG00000020911, ENSMUSG00000016458, ENSMUSG00000045680, ENSMUSG00000039910, ENSMUSG00000056427	199	543	19596	2.90158	0.86752	0.0115454	0.0105506
GOTERM_BP_FAT	GO:0014070~response to organic cyclic compound	26	12.4402	0.000431933	ENSMUSG00000031870, ENSMUSG00000005360, ENSMUSG00000052397, ENSMUSG00000055980, ENSMUSG00000021250, ENSMUSG00000028967, ENSMUSG00000022346, ENSMUSG00000040026, ENSMUSG00000022840, ENSMUSG00000015340, ENSMUSG00000044786, ENSMUSG00000020027, ENSMUSG00000027716, ENSMUSG00000031972, ENSMUSG00000031980, ENSMUSG00000055254, ENSMUSG00000049112, ENSMUSG00000033161, ENSMUSG00000040152, ENSMUSG00000019970,…	199	1193	19596	2.14609	0.86748	0.0115454	0.0105506
GOTERM_BP_FAT	GO:0043583~ear development	11	5.26316	0.000437406	ENSMUSG00000020733, ENSMUSG00000036905, ENSMUSG00000057322, ENSMUSG00000067212, ENSMUSG00000048387, ENSMUSG00000028654, ENSMUSG00000027004, ENSMUSG00000074622, ENSMUSG00000073489, ENSMUSG00000071637, ENSMUSG00000022346	199	270	19596	4.01184	0.870831	0.0116236	0.010622
GOTERM_BP_FAT	GO:1901652~response to peptide	16	7.6555	0.000443082	ENSMUSG00000037868, ENSMUSG00000031980, ENSMUSG00000031075, ENSMUSG00000055980, ENSMUSG00000049112, ENSMUSG00000040249, ENSMUSG00000023992, ENSMUSG00000000120, ENSMUSG00000028967, ENSMUSG00000022346, ENSMUSG00000015340, ENSMUSG00000020027, ENSMUSG00000019970, ENSMUSG00000038894, ENSMUSG00000017737, ENSMUSG00000030730	199	545	19596	2.89093	0.874217	0.0117079	0.0106991
GOTERM_BP_FAT	GO:0072359~circulatory system development	27	12.9187	0.000458153	ENSMUSG00000024042, ENSMUSG00000017969, ENSMUSG00000040249, ENSMUSG00000028967, ENSMUSG00000047414, ENSMUSG00000015340, ENSMUSG00000021798, ENSMUSG00000016458, ENSMUSG00000090698, ENSMUSG00000039910, ENSMUSG00000036856, ENSMUSG00000037868, ENSMUSG00000031980, ENSMUSG00000006221, ENSMUSG00000055254, ENSMUSG00000049112, ENSMUSG00000048387, ENSMUSG00000000120, ENSMUSG00000022893, ENSMUSG00000040152,…	199	1268	19596	2.09681	0.882783	0.0120381	0.0110008
GOTERM_BP_FAT	GO:0050769~positive regulation of neurogenesis	17	8.13397	0.000497722	ENSMUSG00000037868, ENSMUSG00000031980, ENSMUSG00000055254, ENSMUSG00000040249, ENSMUSG00000023992, ENSMUSG00000000120, ENSMUSG00000022893, ENSMUSG00000022346, ENSMUSG00000025885, ENSMUSG00000041120, ENSMUSG00000020027, ENSMUSG00000019970, ENSMUSG00000035042, ENSMUSG00000030854, ENSMUSG00000039533, ENSMUSG00000052934, ENSMUSG00000037820	199	611	19596	2.73982	0.902599	0.0130047	0.0118841
GOTERM_BP_FAT	GO:0014910~regulation of smooth muscle cell migration	7	3.34928	0.000507024	ENSMUSG00000031980, ENSMUSG00000024713, ENSMUSG00000031870, ENSMUSG00000035042, ENSMUSG00000040249, ENSMUSG00000022893, ENSMUSG00000022346	199	99	19596	6.96269	0.906749	0.0131742	0.012039
GOTERM_BP_FAT	GO:0001934~positive regulation of protein phosphorylation	24	11.4833	0.000523638	ENSMUSG00000031451, ENSMUSG00000054675, ENSMUSG00000031980, ENSMUSG00000028871, ENSMUSG00000018849, ENSMUSG00000078853, ENSMUSG00000086962, ENSMUSG00000055254, ENSMUSG00000040249, ENSMUSG00000023992, ENSMUSG00000023046, ENSMUSG00000000120, ENSMUSG00000024621, ENSMUSG00000024610, ENSMUSG00000040152, ENSMUSG00000069874, ENSMUSG00000035042, ENSMUSG00000009185, ENSMUSG00000032726, ENSMUSG00000074345,…	199	1070	19596	2.20873	0.913725	0.0135307	0.0123648
GOTERM_BP_FAT	GO:0002685~regulation of leukocyte migration	10	4.78469	0.000582693	ENSMUSG00000040152, ENSMUSG00000041120, ENSMUSG00000031451, ENSMUSG00000035042, ENSMUSG00000056529, ENSMUSG00000017737, ENSMUSG00000023992, ENSMUSG00000034652, ENSMUSG00000024621, ENSMUSG00000024610	199	231	19596	4.26287	0.934561	0.0149739	0.0136837
GOTERM_BP_FAT	GO:0034220~ion transmembrane transport	22	10.5263	0.000595978	ENSMUSG00000031451, ENSMUSG00000031980, ENSMUSG00000055489, ENSMUSG00000005360, ENSMUSG00000031075, ENSMUSG00000048387, ENSMUSG00000033161, ENSMUSG00000023992, ENSMUSG00000023243, ENSMUSG00000022346, ENSMUSG00000040152, ENSMUSG00000027716, ENSMUSG00000050856, ENSMUSG00000020733, ENSMUSG00000020704, ENSMUSG00000056529, ENSMUSG00000038894, ENSMUSG00000034320, ENSMUSG00000017737, ENSMUSG00000038642,…	199	944	19596	2.29491	0.938506	0.0152316	0.0139192
GOTERM_BP_FAT	GO:0097529~myeloid leukocyte migration	10	4.78469	0.000605487	ENSMUSG00000040152, ENSMUSG00000041120, ENSMUSG00000035042, ENSMUSG00000009185, ENSMUSG00000023992, ENSMUSG00000057729, ENSMUSG00000002897, ENSMUSG00000034652, ENSMUSG00000024621, ENSMUSG00000024610	199	232	19596	4.2445	0.941183	0.0153906	0.0140644
GOTERM_BP_FAT	GO:0009617~response to bacterium	25	11.9617	0.000614748	ENSMUSG00000032661, ENSMUSG00000032089, ENSMUSG00000021250, ENSMUSG00000046805, ENSMUSG00000054072, ENSMUSG00000023992, ENSMUSG00000040026, ENSMUSG00000044786, ENSMUSG00000040264, ENSMUSG00000035692, ENSMUSG00000037379, ENSMUSG00000019787, ENSMUSG00000078853, ENSMUSG00000026536, ENSMUSG00000069874, ENSMUSG00000000204, ENSMUSG00000070034, ENSMUSG00000002602, ENSMUSG00000035042, ENSMUSG00000067212,…	199	1152	19596	2.13699	0.943678	0.0155415	0.0142023
GOTERM_BP_FAT	GO:0016485~protein processing	11	5.26316	0.000630801	ENSMUSG00000040152, ENSMUSG00000024713, ENSMUSG00000038156, ENSMUSG00000036098, ENSMUSG00000036596, ENSMUSG00000023992, ENSMUSG00000038642, ENSMUSG00000074622, ENSMUSG00000073489, ENSMUSG00000032359, ENSMUSG00000022346	199	283	19596	3.82755	0.947755	0.0157768	0.0144173
GOTERM_BP_FAT	GO:0008406~gonad development	11	5.26316	0.000630801	ENSMUSG00000036856, ENSMUSG00000031980, ENSMUSG00000031870, ENSMUSG00000048387, ENSMUSG00000016458, ENSMUSG00000045680, ENSMUSG00000022893, ENSMUSG00000039910, ENSMUSG00000022346, ENSMUSG00000056427, ENSMUSG00000042842	199	283	19596	3.82755	0.947755	0.0157768	0.0144173
GOTERM_BP_FAT	GO:0072358~cardiovascular system development	20	9.56938	0.000664298	ENSMUSG00000036856, ENSMUSG00000037868, ENSMUSG00000031980, ENSMUSG00000017969, ENSMUSG00000055254, ENSMUSG00000048387, ENSMUSG00000040249, ENSMUSG00000000120, ENSMUSG00000028967, ENSMUSG00000022893, ENSMUSG00000040152, ENSMUSG00000015340, ENSMUSG00000024713, ENSMUSG00000035042, ENSMUSG00000016458, ENSMUSG00000045680, ENSMUSG00000017737, ENSMUSG00000090698, ENSMUSG00000032359, ENSMUSG00000039910	199	819	19596	2.4047	0.955337	0.0161819	0.0147876
GOTERM_BP_FAT	GO:0044706~multi-multicellular organism process	11	5.26316	0.000653611	ENSMUSG00000036856, ENSMUSG00000034009, ENSMUSG00000031980, ENSMUSG00000024713, ENSMUSG00000031870, ENSMUSG00000017969, ENSMUSG00000049112, ENSMUSG00000056529, ENSMUSG00000021250, ENSMUSG00000017737, ENSMUSG00000039910	199	284	19596	3.81407	0.953046	0.0161819	0.0147876
GOTERM_BP_FAT	GO:0044344~cellular response to fibroblast growth factor stimulus	7	3.34928	0.000658626	ENSMUSG00000040152, ENSMUSG00000047414, ENSMUSG00000036856, ENSMUSG00000044786, ENSMUSG00000047787, ENSMUSG00000000120, ENSMUSG00000022346	199	104	19596	6.62795	0.954136	0.0161819	0.0147876
GOTERM_BP_FAT	GO:0002761~regulation of myeloid leukocyte differentiation	8	3.82775	0.000662126	ENSMUSG00000035042, ENSMUSG00000021250, ENSMUSG00000023992, ENSMUSG00000074622, ENSMUSG00000036896, ENSMUSG00000022346, ENSMUSG00000024621, ENSMUSG00000024610	199	144	19596	5.47069	0.954881	0.0161819	0.0147876
GOTERM_BP_FAT	GO:0001944~vasculature development	20	9.56938	0.000664298	ENSMUSG00000036856, ENSMUSG00000037868, ENSMUSG00000031980, ENSMUSG00000017969, ENSMUSG00000055254, ENSMUSG00000048387, ENSMUSG00000040249, ENSMUSG00000000120, ENSMUSG00000028967, ENSMUSG00000022893, ENSMUSG00000040152, ENSMUSG00000015340, ENSMUSG00000024713, ENSMUSG00000035042, ENSMUSG00000016458, ENSMUSG00000045680, ENSMUSG00000017737, ENSMUSG00000090698, ENSMUSG00000032359, ENSMUSG00000039910	199	819	19596	2.4047	0.955337	0.0161819	0.0147876
GOTERM_BP_FAT	GO:0014909~smooth muscle cell migration	7	3.34928	0.000692759	ENSMUSG00000031980, ENSMUSG00000024713, ENSMUSG00000031870, ENSMUSG00000035042, ENSMUSG00000040249, ENSMUSG00000022893, ENSMUSG00000022346	199	105	19596	6.56482	0.960909	0.0167877	0.0153412
GOTERM_BP_FAT	GO:0032101~regulation of response to external stimulus	21	10.0478	0.000722118	ENSMUSG00000029860, ENSMUSG00000036856, ENSMUSG00000031451, ENSMUSG00000031980, ENSMUSG00000017969, ENSMUSG00000040249, ENSMUSG00000023992, ENSMUSG00000002897, ENSMUSG00000006205, ENSMUSG00000041202, ENSMUSG00000027514, ENSMUSG00000025017, ENSMUSG00000024621, ENSMUSG00000024610, ENSMUSG00000040152, ENSMUSG00000041120, ENSMUSG00000044786, ENSMUSG00000035042, ENSMUSG00000067212, ENSMUSG00000038642,…	199	891	19596	2.3209	0.965928	0.017409	0.0159089
GOTERM_BP_FAT	GO:0061061~muscle structure development	19	9.09091	0.000738338	ENSMUSG00000036856, ENSMUSG00000037868, ENSMUSG00000049382, ENSMUSG00000054675, ENSMUSG00000031980, ENSMUSG00000024042, ENSMUSG00000057003, ENSMUSG00000021250, ENSMUSG00000020186, ENSMUSG00000022346, ENSMUSG00000021798, ENSMUSG00000068699, ENSMUSG00000020911, ENSMUSG00000030748, ENSMUSG00000009185, ENSMUSG00000016458, ENSMUSG00000045680, ENSMUSG00000031972, ENSMUSG00000039910	199	761	19596	2.45857	0.96842	0.0175121	0.0160032
GOTERM_BP_FAT	GO:0048659~smooth muscle cell proliferation	9	4.30622	0.000737995	ENSMUSG00000040152, ENSMUSG00000031980, ENSMUSG00000021390, ENSMUSG00000035042, ENSMUSG00000056529, ENSMUSG00000017737, ENSMUSG00000022893, ENSMUSG00000037820, ENSMUSG00000022346	199	191	19596	4.64006	0.968369	0.0175121	0.0160032
GOTERM_BP_FAT	GO:0048143~astrocyte activation	4	1.91388	0.000741298	ENSMUSG00000031980, ENSMUSG00000040249, ENSMUSG00000023992, ENSMUSG00000036887	199	18	19596	21.8827	0.968854	0.0175121	0.0160032
GOTERM_BP_FAT	GO:0045137~development of primary sexual characteristics	11	5.26316	0.000741372	ENSMUSG00000036856, ENSMUSG00000031980, ENSMUSG00000031870, ENSMUSG00000048387, ENSMUSG00000016458, ENSMUSG00000045680, ENSMUSG00000022893, ENSMUSG00000039910, ENSMUSG00000022346, ENSMUSG00000056427, ENSMUSG00000042842	199	289	19596	3.74808	0.968865	0.0175121	0.0160032
GOTERM_BP_FAT	GO:0071417~cellular response to organonitrogen compound	18	8.61244	0.000763889	ENSMUSG00000031980, ENSMUSG00000005360, ENSMUSG00000031075, ENSMUSG00000052397, ENSMUSG00000055254, ENSMUSG00000055980, ENSMUSG00000040249, ENSMUSG00000023992, ENSMUSG00000000120, ENSMUSG00000028967, ENSMUSG00000022346, ENSMUSG00000015340, ENSMUSG00000020027, ENSMUSG00000019970, ENSMUSG00000056529, ENSMUSG00000038894, ENSMUSG00000037820, ENSMUSG00000031972	199	699	19596	2.53577	0.97198	0.0177153	0.0161888
GOTERM_BP_FAT	GO:0048660~regulation of smooth muscle cell proliferation	9	4.30622	0.000764957	ENSMUSG00000040152, ENSMUSG00000031980, ENSMUSG00000021390, ENSMUSG00000035042, ENSMUSG00000056529, ENSMUSG00000017737, ENSMUSG00000022893, ENSMUSG00000037820, ENSMUSG00000022346	199	192	19596	4.61589	0.97212	0.0177153	0.0161888
GOTERM_BP_FAT	GO:0042325~regulation of phosphorylation	32	15.311	0.000756928	ENSMUSG00000031451, ENSMUSG00000054675, ENSMUSG00000052397, ENSMUSG00000086962, ENSMUSG00000055980, ENSMUSG00000040249, ENSMUSG00000023992, ENSMUSG00000028967, ENSMUSG00000022346, ENSMUSG00000024621, ENSMUSG00000032726, ENSMUSG00000074345, ENSMUSG00000039533, ENSMUSG00000031980, ENSMUSG00000028871, ENSMUSG00000018849, ENSMUSG00000078853, ENSMUSG00000055254, ENSMUSG00000023046, ENSMUSG00000000120,…	199	1679	19596	1.87678	0.971052	0.0177153	0.0161888
GOTERM_BP_FAT	GO:0014066~regulation of phosphatidylinositol 3-kinase signaling	7	3.34928	0.000765123	ENSMUSG00000031980, ENSMUSG00000020733, ENSMUSG00000035042, ENSMUSG00000055254, ENSMUSG00000034573, ENSMUSG00000023992, ENSMUSG00000025017	199	107	19596	6.44212	0.972142	0.0177153	0.0161888
GOTERM_BP_FAT	GO:0010720~positive regulation of cell development	18	8.61244	0.000826247	ENSMUSG00000037868, ENSMUSG00000031980, ENSMUSG00000055254, ENSMUSG00000040249, ENSMUSG00000023992, ENSMUSG00000000120, ENSMUSG00000022893, ENSMUSG00000022346, ENSMUSG00000025885, ENSMUSG00000041120, ENSMUSG00000020027, ENSMUSG00000021215, ENSMUSG00000019970, ENSMUSG00000035042, ENSMUSG00000030854, ENSMUSG00000039533, ENSMUSG00000052934, ENSMUSG00000037820	199	704	19596	2.51776	0.979074	0.0190362	0.017396
GOTERM_BP_FAT	GO:0006935~chemotaxis	17	8.13397	0.000830437	ENSMUSG00000037868, ENSMUSG00000031451, ENSMUSG00000040249, ENSMUSG00000023992, ENSMUSG00000002897, ENSMUSG00000000120, ENSMUSG00000040026, ENSMUSG00000024621, ENSMUSG00000024610, ENSMUSG00000040152, ENSMUSG00000041120, ENSMUSG00000047414, ENSMUSG00000035042, ENSMUSG00000009185, ENSMUSG00000056529, ENSMUSG00000056427, ENSMUSG00000018920	199	641	19596	2.61159	0.979481	0.019039	0.0173985
GOTERM_BP_FAT	GO:0048144~fibroblast proliferation	7	3.34928	0.000843194	ENSMUSG00000031451, ENSMUSG00000031980, ENSMUSG00000017737, ENSMUSG00000034652, ENSMUSG00000000120, ENSMUSG00000022346, ENSMUSG00000024610	199	109	19596	6.32391	0.980671	0.0191438	0.0174942
GOTERM_BP_FAT	GO:0001657~ureteric bud development	7	3.34928	0.000843194	ENSMUSG00000036856, ENSMUSG00000031980, ENSMUSG00000025934, ENSMUSG00000048387, ENSMUSG00000016458, ENSMUSG00000045680, ENSMUSG00000022346	199	109	19596	6.32391	0.980671	0.0191438	0.0174942
GOTERM_BP_FAT	GO:0050727~regulation of inflammatory response	13	6.2201	0.000868714	ENSMUSG00000029860, ENSMUSG00000031980, ENSMUSG00000017969, ENSMUSG00000023992, ENSMUSG00000002897, ENSMUSG00000041202, ENSMUSG00000027514, ENSMUSG00000025017, ENSMUSG00000044786, ENSMUSG00000035042, ENSMUSG00000067212, ENSMUSG00000038642, ENSMUSG00000037820	199	404	19596	3.16867	0.982847	0.0196279	0.0179366
GOTERM_BP_FAT	GO:0072164~mesonephric tubule development	7	3.34928	0.000884463	ENSMUSG00000036856, ENSMUSG00000031980, ENSMUSG00000025934, ENSMUSG00000048387, ENSMUSG00000016458, ENSMUSG00000045680, ENSMUSG00000022346	199	110	19596	6.26642	0.984067	0.0196983	0.0180009
GOTERM_BP_FAT	GO:0072163~mesonephric epithelium development	7	3.34928	0.000884463	ENSMUSG00000036856, ENSMUSG00000031980, ENSMUSG00000025934, ENSMUSG00000048387, ENSMUSG00000016458, ENSMUSG00000045680, ENSMUSG00000022346	199	110	19596	6.26642	0.984067	0.0196983	0.0180009
GOTERM_BP_FAT	GO:0048145~regulation of fibroblast proliferation	7	3.34928	0.000884463	ENSMUSG00000031451, ENSMUSG00000031980, ENSMUSG00000017737, ENSMUSG00000034652, ENSMUSG00000000120, ENSMUSG00000022346, ENSMUSG00000024610	199	110	19596	6.26642	0.984067	0.0196983	0.0180009
GOTERM_BP_FAT	GO:0001568~blood vessel development	19	9.09091	0.000896019	ENSMUSG00000036856, ENSMUSG00000037868, ENSMUSG00000031980, ENSMUSG00000017969, ENSMUSG00000055254, ENSMUSG00000048387, ENSMUSG00000040249, ENSMUSG00000000120, ENSMUSG00000022893, ENSMUSG00000040152, ENSMUSG00000015340, ENSMUSG00000024713, ENSMUSG00000035042, ENSMUSG00000016458, ENSMUSG00000045680, ENSMUSG00000017737, ENSMUSG00000090698, ENSMUSG00000032359, ENSMUSG00000039910	199	774	19596	2.41728	0.984906	0.019861	0.0181497
GOTERM_BP_FAT	GO:0042330~taxis	17	8.13397	0.000901173	ENSMUSG00000037868, ENSMUSG00000031451, ENSMUSG00000040249, ENSMUSG00000023992, ENSMUSG00000002897, ENSMUSG00000000120, ENSMUSG00000040026, ENSMUSG00000024621, ENSMUSG00000024610, ENSMUSG00000040152, ENSMUSG00000041120, ENSMUSG00000047414, ENSMUSG00000035042, ENSMUSG00000009185, ENSMUSG00000056529, ENSMUSG00000056427, ENSMUSG00000018920	199	646	19596	2.59138	0.985266	0.0198811	0.018168
GOTERM_BP_FAT	GO:0072171~mesonephric tubule morphogenesis	6	2.87081	0.000916973	ENSMUSG00000036856, ENSMUSG00000031980, ENSMUSG00000048387, ENSMUSG00000016458, ENSMUSG00000045680, ENSMUSG00000022346	199	74	19596	7.98425	0.986317	0.0201347	0.0183997
GOTERM_BP_FAT	GO:0071774~response to fibroblast growth factor	7	3.34928	0.000927271	ENSMUSG00000040152, ENSMUSG00000047414, ENSMUSG00000036856, ENSMUSG00000044786, ENSMUSG00000047787, ENSMUSG00000000120, ENSMUSG00000022346	199	111	19596	6.20997	0.986961	0.0202656	0.0185194
GOTERM_BP_FAT	GO:1901698~response to nitrogen compound	26	12.4402	0.00094962	ENSMUSG00000031870, ENSMUSG00000031075, ENSMUSG00000005360, ENSMUSG00000052397, ENSMUSG00000055980, ENSMUSG00000021250, ENSMUSG00000040249, ENSMUSG00000023992, ENSMUSG00000028967, ENSMUSG00000022346, ENSMUSG00000015340, ENSMUSG00000020027, ENSMUSG00000027716, ENSMUSG00000031972, ENSMUSG00000037868, ENSMUSG00000031980, ENSMUSG00000055254, ENSMUSG00000049112, ENSMUSG00000000120, ENSMUSG00000040152,…	199	1260	19596	2.03197	0.988256	0.0206576	0.0188776
GOTERM_BP_FAT	GO:0072162~metanephric mesenchymal cell differentiation	3	1.43541	0.000995653	ENSMUSG00000036856, ENSMUSG00000048387, ENSMUSG00000045680	199	5	19596	59.0834	0.990533	0.0214593	0.0196102
GOTERM_BP_FAT	GO:0043408~regulation of MAPK cascade	19	9.09091	0.000992302	ENSMUSG00000031451, ENSMUSG00000031980, ENSMUSG00000018849, ENSMUSG00000052397, ENSMUSG00000055254, ENSMUSG00000040249, ENSMUSG00000023992, ENSMUSG00000023046, ENSMUSG00000000120, ENSMUSG00000028967, ENSMUSG00000024621, ENSMUSG00000024610, ENSMUSG00000040152, ENSMUSG00000020733, ENSMUSG00000035042, ENSMUSG00000009185, ENSMUSG00000074345, ENSMUSG00000030854, ENSMUSG00000034652	199	781	19596	2.39561	0.990384	0.0214593	0.0196102
GOTERM_BP_FAT	GO:0060485~mesenchyme development	11	5.26316	0.00101312	ENSMUSG00000040152, ENSMUSG00000036856, ENSMUSG00000028487, ENSMUSG00000048387, ENSMUSG00000016458, ENSMUSG00000045680, ENSMUSG00000027004, ENSMUSG00000031972, ENSMUSG00000039910, ENSMUSG00000022346, ENSMUSG00000035403	199	301	19596	3.59866	0.991277	0.0217357	0.0198628
GOTERM_BP_FAT	GO:1904754~positive regulation of vascular associated smooth muscle cell migration	4	1.91388	0.00102034	ENSMUSG00000031980, ENSMUSG00000024713, ENSMUSG00000040249, ENSMUSG00000022893	199	20	19596	19.6945	0.991567	0.0217906	0.019913
GOTERM_BP_FAT	GO:0098542~defense response to other organism	20	9.56938	0.00104552	ENSMUSG00000032661, ENSMUSG00000078853, ENSMUSG00000033450, ENSMUSG00000046805, ENSMUSG00000023992, ENSMUSG00000054072, ENSMUSG00000062488, ENSMUSG00000002897, ENSMUSG00000006205, ENSMUSG00000027514, ENSMUSG00000021356, ENSMUSG00000069874, ENSMUSG00000040264, ENSMUSG00000035042, ENSMUSG00000030748, ENSMUSG00000067212, ENSMUSG00000035692, ENSMUSG00000037379, ENSMUSG00000105096, ENSMUSG00000073489	199	851	19596	2.31427	0.992505	0.0222268	0.0203116
GOTERM_BP_FAT	GO:2000106~regulation of leukocyte apoptotic process	7	3.34928	0.00106531	ENSMUSG00000031451, ENSMUSG00000002602, ENSMUSG00000035042, ENSMUSG00000038894, ENSMUSG00000027322, ENSMUSG00000022346, ENSMUSG00000024610	199	114	19596	6.04655	0.993168	0.0224436	0.0205097
GOTERM_BP_FAT	GO:0033674~positive regulation of kinase activity	15	7.17703	0.00106453	ENSMUSG00000031451, ENSMUSG00000031980, ENSMUSG00000078853, ENSMUSG00000055254, ENSMUSG00000055980, ENSMUSG00000023992, ENSMUSG00000023046, ENSMUSG00000024621, ENSMUSG00000024610, ENSMUSG00000040152, ENSMUSG00000069874, ENSMUSG00000002602, ENSMUSG00000074345, ENSMUSG00000039533, ENSMUSG00000034652	199	532	19596	2.77648	0.993143	0.0224436	0.0205097
GOTERM_BP_FAT	GO:0051960~regulation of nervous system development	24	11.4833	0.00108177	ENSMUSG00000037868, ENSMUSG00000031980, ENSMUSG00000055254, ENSMUSG00000049112, ENSMUSG00000040249, ENSMUSG00000023992, ENSMUSG00000028654, ENSMUSG00000025789, ENSMUSG00000000120, ENSMUSG00000022893, ENSMUSG00000022346, ENSMUSG00000025885, ENSMUSG00000041120, ENSMUSG00000047414, ENSMUSG00000020027, ENSMUSG00000019970, ENSMUSG00000047787, ENSMUSG00000035042, ENSMUSG00000036098, ENSMUSG00000020704,…	199	1129	19596	2.0933	0.993675	0.022688	0.0207331
GOTERM_BP_FAT	GO:0031032~actomyosin structure organization	9	4.30622	0.00109683	ENSMUSG00000036856, ENSMUSG00000021798, ENSMUSG00000029860, ENSMUSG00000049382, ENSMUSG00000068699, ENSMUSG00000020911, ENSMUSG00000057003, ENSMUSG00000020186, ENSMUSG00000031972	199	203	19596	4.36577	0.994106	0.0229013	0.0209279
GOTERM_BP_FAT	GO:0001823~mesonephros development	7	3.34928	0.00111467	ENSMUSG00000036856, ENSMUSG00000031980, ENSMUSG00000025934, ENSMUSG00000048387, ENSMUSG00000016458, ENSMUSG00000045680, ENSMUSG00000022346	199	115	19596	5.99397	0.994578	0.0231702	0.0211737
GOTERM_BP_FAT	GO:0051338~regulation of transferase activity	21	10.0478	0.00112513	ENSMUSG00000031451, ENSMUSG00000031980, ENSMUSG00000078853, ENSMUSG00000055254, ENSMUSG00000055980, ENSMUSG00000023992, ENSMUSG00000023046, ENSMUSG00000028967, ENSMUSG00000022346, ENSMUSG00000024621, ENSMUSG00000024610, ENSMUSG00000040152, ENSMUSG00000069874, ENSMUSG00000044786, ENSMUSG00000020733, ENSMUSG00000002602, ENSMUSG00000074345, ENSMUSG00000038894, ENSMUSG00000030854, ENSMUSG00000039533,…	199	924	19596	2.23801	0.994837	0.0232841	0.0212778
GOTERM_BP_FAT	GO:0055085~transmembrane transport	26	12.4402	0.00115863	ENSMUSG00000031451, ENSMUSG00000055489, ENSMUSG00000031075, ENSMUSG00000005360, ENSMUSG00000023992, ENSMUSG00000022346, ENSMUSG00000015340, ENSMUSG00000027716, ENSMUSG00000050856, ENSMUSG00000089774, ENSMUSG00000020704, ENSMUSG00000034320, ENSMUSG00000038642, ENSMUSG00000019787, ENSMUSG00000031980, ENSMUSG00000048387, ENSMUSG00000033161, ENSMUSG00000023243, ENSMUSG00000044217, ENSMUSG00000040152,…	199	1278	19596	2.00335	0.995587	0.0237672	0.0217193
GOTERM_BP_FAT	GO:0007548~sex differentiation	12	5.74163	0.00115455	ENSMUSG00000036856, ENSMUSG00000031980, ENSMUSG00000031870, ENSMUSG00000002602, ENSMUSG00000048387, ENSMUSG00000016458, ENSMUSG00000045680, ENSMUSG00000022893, ENSMUSG00000039910, ENSMUSG00000022346, ENSMUSG00000056427, ENSMUSG00000042842	199	361	19596	3.27332	0.995502	0.0237672	0.0217193
GOTERM_BP_FAT	GO:0045639~positive regulation of myeloid cell differentiation	7	3.34928	0.00116575	ENSMUSG00000035042, ENSMUSG00000086962, ENSMUSG00000035692, ENSMUSG00000021250, ENSMUSG00000023992, ENSMUSG00000024621, ENSMUSG00000024610	199	116	19596	5.9423	0.995732	0.0238088	0.0217573
GOTERM_BP_FAT	GO:1902533~positive regulation of intracellular signal transduction	24	11.4833	0.00117383	ENSMUSG00000031451, ENSMUSG00000031980, ENSMUSG00000032089, ENSMUSG00000018849, ENSMUSG00000055254, ENSMUSG00000040249, ENSMUSG00000023992, ENSMUSG00000023046, ENSMUSG00000000120, ENSMUSG00000022346, ENSMUSG00000025017, ENSMUSG00000024621, ENSMUSG00000024610, ENSMUSG00000040152, ENSMUSG00000021215, ENSMUSG00000020733, ENSMUSG00000002602, ENSMUSG00000035042, ENSMUSG00000009185, ENSMUSG00000074345,…	199	1136	19596	2.0804	0.99589	0.0238608	0.0218048
GOTERM_BP_FAT	GO:0048525~negative regulation of viral process	8	3.82775	0.0011836	ENSMUSG00000044786, ENSMUSG00000032661, ENSMUSG00000035042, ENSMUSG00000009185, ENSMUSG00000035692, ENSMUSG00000073489, ENSMUSG00000006205, ENSMUSG00000024610	199	159	19596	4.95458	0.996074	0.0238608	0.0218048
GOTERM_BP_FAT	GO:0002577~regulation of antigen processing and presentation	4	1.91388	0.00118159	ENSMUSG00000040152, ENSMUSG00000073421, ENSMUSG00000023992, ENSMUSG00000024610	199	21	19596	18.7566	0.996037	0.0238608	0.0218048
GOTERM_BP_FAT	GO:0016310~phosphorylation	40	19.1388	0.00119129	ENSMUSG00000031451, ENSMUSG00000054675, ENSMUSG00000024042, ENSMUSG00000052397, ENSMUSG00000086962, ENSMUSG00000055980, ENSMUSG00000040249, ENSMUSG00000023992, ENSMUSG00000028967, ENSMUSG00000022346, ENSMUSG00000040026, ENSMUSG00000024621, ENSMUSG00000044786, ENSMUSG00000020027, ENSMUSG00000032726, ENSMUSG00000074345, ENSMUSG00000039533, ENSMUSG00000031980, ENSMUSG00000028871, ENSMUSG00000018849,…	199	2351	19596	1.67541	0.996213	0.0239128	0.0218523
GOTERM_BP_FAT	GO:0046903~secretion	24	11.4833	0.00122942	ENSMUSG00000031980, ENSMUSG00000031075, ENSMUSG00000052397, ENSMUSG00000055254, ENSMUSG00000055980, ENSMUSG00000049112, ENSMUSG00000040249, ENSMUSG00000023992, ENSMUSG00000044217, ENSMUSG00000041202, ENSMUSG00000022346, ENSMUSG00000025885, ENSMUSG00000022840, ENSMUSG00000024610, ENSMUSG00000020027, ENSMUSG00000020733, ENSMUSG00000002602, ENSMUSG00000035042, ENSMUSG00000030748, ENSMUSG00000009185,…	199	1140	19596	2.0731	0.996832	0.0245726	0.0224552
GOTERM_BP_FAT	GO:0033002~muscle cell proliferation	10	4.78469	0.00124686	ENSMUSG00000040152, ENSMUSG00000031980, ENSMUSG00000021390, ENSMUSG00000035042, ENSMUSG00000056529, ENSMUSG00000017737, ENSMUSG00000022893, ENSMUSG00000037820, ENSMUSG00000039910, ENSMUSG00000022346	199	257	19596	3.83161	0.997081	0.0248152	0.0226769
GOTERM_BP_FAT	GO:0097028~dendritic cell differentiation	5	2.39234	0.00128413	ENSMUSG00000031451, ENSMUSG00000002602, ENSMUSG00000023992, ENSMUSG00000057729, ENSMUSG00000021356	199	47	19596	10.4758	0.997548	0.0253413	0.0231577
GOTERM_BP_FAT	GO:0045214~sarcomere organization	5	2.39234	0.00128413	ENSMUSG00000021798, ENSMUSG00000049382, ENSMUSG00000068699, ENSMUSG00000020911, ENSMUSG00000020186	199	47	19596	10.4758	0.997548	0.0253413	0.0231577
GOTERM_BP_FAT	GO:0051965~positive regulation of synapse assembly	6	2.87081	0.00130338	ENSMUSG00000047414, ENSMUSG00000047787, ENSMUSG00000055254, ENSMUSG00000020704, ENSMUSG00000049112, ENSMUSG00000025789	199	80	19596	7.38543	0.99776	0.025613	0.0234061
GOTERM_BP_FAT	GO:0097530~granulocyte migration	8	3.82775	0.00131873	ENSMUSG00000040152, ENSMUSG00000035042, ENSMUSG00000009185, ENSMUSG00000057729, ENSMUSG00000002897, ENSMUSG00000034652, ENSMUSG00000024621, ENSMUSG00000024610	199	162	19596	4.86283	0.997915	0.0257809	0.0235594
GOTERM_BP_FAT	GO:0051128~regulation of cellular component organization	47	22.488	0.00132841	ENSMUSG00000030222, ENSMUSG00000031451, ENSMUSG00000032089, ENSMUSG00000052397, ENSMUSG00000057003, ENSMUSG00000040249, ENSMUSG00000023992, ENSMUSG00000022346, ENSMUSG00000027656, ENSMUSG00000024621, ENSMUSG00000020961, ENSMUSG00000047414, ENSMUSG00000021215, ENSMUSG00000020027, ENSMUSG00000030748, ENSMUSG00000035692, ENSMUSG00000020704, ENSMUSG00000016458, ENSMUSG00000057729, ENSMUSG00000052934,…	199	2935	19596	1.5769	0.998008	0.0257809	0.0235594
GOTERM_BP_FAT	GO:0019220~regulation of phosphate metabolic process	34	16.2679	0.00132846	ENSMUSG00000034009, ENSMUSG00000031451, ENSMUSG00000054675, ENSMUSG00000052397, ENSMUSG00000086962, ENSMUSG00000055980, ENSMUSG00000040249, ENSMUSG00000023992, ENSMUSG00000028967, ENSMUSG00000022346, ENSMUSG00000024621, ENSMUSG00000032726, ENSMUSG00000074345, ENSMUSG00000039533, ENSMUSG00000031980, ENSMUSG00000028871, ENSMUSG00000018849, ENSMUSG00000078853, ENSMUSG00000055254, ENSMUSG00000023046,…	199	1892	19596	1.76959	0.998008	0.0257809	0.0235594
GOTERM_BP_FAT	GO:0032103~positive regulation of response to external stimulus	12	5.74163	0.00134263	ENSMUSG00000040152, ENSMUSG00000031451, ENSMUSG00000035042, ENSMUSG00000067212, ENSMUSG00000040249, ENSMUSG00000023992, ENSMUSG00000038642, ENSMUSG00000002897, ENSMUSG00000037820, ENSMUSG00000027514, ENSMUSG00000024621, ENSMUSG00000024610	199	368	19596	3.21106	0.998136	0.0259482	0.0237124
GOTERM_BP_FAT	GO:0043549~regulation of kinase activity	19	9.09091	0.00135469	ENSMUSG00000031451, ENSMUSG00000031980, ENSMUSG00000078853, ENSMUSG00000055254, ENSMUSG00000055980, ENSMUSG00000023992, ENSMUSG00000023046, ENSMUSG00000028967, ENSMUSG00000024621, ENSMUSG00000024610, ENSMUSG00000040152, ENSMUSG00000069874, ENSMUSG00000020733, ENSMUSG00000002602, ENSMUSG00000074345, ENSMUSG00000038894, ENSMUSG00000030854, ENSMUSG00000039533, ENSMUSG00000034652	199	803	19596	2.32998	0.998238	0.0260735	0.0238268
GOTERM_BP_FAT	GO:0051174~regulation of phosphorus metabolic process	34	16.2679	0.00138795	ENSMUSG00000034009, ENSMUSG00000031451, ENSMUSG00000054675, ENSMUSG00000052397, ENSMUSG00000086962, ENSMUSG00000055980, ENSMUSG00000040249, ENSMUSG00000023992, ENSMUSG00000028967, ENSMUSG00000022346, ENSMUSG00000024621, ENSMUSG00000032726, ENSMUSG00000074345, ENSMUSG00000039533, ENSMUSG00000031980, ENSMUSG00000028871, ENSMUSG00000018849, ENSMUSG00000078853, ENSMUSG00000055254, ENSMUSG00000023046,…	199	1897	19596	1.76492	0.998493	0.0266043	0.0243119
GOTERM_BP_FAT	GO:0048771~tissue remodeling	9	4.30622	0.00140468	ENSMUSG00000054675, ENSMUSG00000031980, ENSMUSG00000002602, ENSMUSG00000040249, ENSMUSG00000017737, ENSMUSG00000038642, ENSMUSG00000006931, ENSMUSG00000037820, ENSMUSG00000024621	199	211	19596	4.20024	0.998606	0.0267732	0.0244663
GOTERM_BP_FAT	GO:0042493~response to drug	14	6.69856	0.00140821	ENSMUSG00000031451, ENSMUSG00000005360, ENSMUSG00000026077, ENSMUSG00000049112, ENSMUSG00000021250, ENSMUSG00000033161, ENSMUSG00000043969, ENSMUSG00000022346, ENSMUSG00000040152, ENSMUSG00000015340, ENSMUSG00000038393, ENSMUSG00000020704, ENSMUSG00000017737, ENSMUSG00000030854	199	487	19596	2.83083	0.998629	0.0267732	0.0244663
GOTERM_BP_FAT	GO:0030198~extracellular matrix organization	11	5.26316	0.00145184	ENSMUSG00000047414, ENSMUSG00000034009, ENSMUSG00000031451, ENSMUSG00000031980, ENSMUSG00000016458, ENSMUSG00000058297, ENSMUSG00000017737, ENSMUSG00000038642, ENSMUSG00000020473, ENSMUSG00000022893, ENSMUSG00000006931	199	316	19596	3.42784	0.998882	0.0274909	0.0251221
GOTERM_BP_FAT	GO:0090288~negative regulation of cellular response to growth factor stimulus	8	3.82775	0.00151721	ENSMUSG00000040152, ENSMUSG00000034612, ENSMUSG00000041120, ENSMUSG00000036856, ENSMUSG00000031980, ENSMUSG00000040249, ENSMUSG00000000120, ENSMUSG00000006205	199	166	19596	4.74566	0.999177	0.028354	0.0259109
GOTERM_BP_FAT	GO:0043062~extracellular structure organization	11	5.26316	0.00152167	ENSMUSG00000047414, ENSMUSG00000034009, ENSMUSG00000031451, ENSMUSG00000031980, ENSMUSG00000016458, ENSMUSG00000058297, ENSMUSG00000017737, ENSMUSG00000038642, ENSMUSG00000020473, ENSMUSG00000022893, ENSMUSG00000006931	199	318	19596	3.40628	0.999194	0.028354	0.0259109
GOTERM_BP_FAT	GO:0007159~leukocyte cell-cell adhesion	13	6.2201	0.00150443	ENSMUSG00000052397, ENSMUSG00000060586, ENSMUSG00000041202, ENSMUSG00000024610, ENSMUSG00000040152, ENSMUSG00000036594, ENSMUSG00000035042, ENSMUSG00000030748, ENSMUSG00000067212, ENSMUSG00000037440, ENSMUSG00000056529, ENSMUSG00000073421, ENSMUSG00000034652	199	431	19596	2.97016	0.999127	0.028354	0.0259109
GOTERM_BP_FAT	GO:0002687~positive regulation of leukocyte migration	8	3.82775	0.00151721	ENSMUSG00000040152, ENSMUSG00000031451, ENSMUSG00000035042, ENSMUSG00000056529, ENSMUSG00000017737, ENSMUSG00000023992, ENSMUSG00000024621, ENSMUSG00000024610	199	166	19596	4.74566	0.999177	0.028354	0.0259109
GOTERM_BP_FAT	GO:0072078~nephron tubule morphogenesis	6	2.87081	0.00153632	ENSMUSG00000036856, ENSMUSG00000031980, ENSMUSG00000048387, ENSMUSG00000016458, ENSMUSG00000045680, ENSMUSG00000022346	199	83	19596	7.11848	0.999248	0.0285133	0.0260564
GOTERM_BP_FAT	GO:0046660~female sex differentiation	8	3.82775	0.00156944	ENSMUSG00000036856, ENSMUSG00000031980, ENSMUSG00000031870, ENSMUSG00000002602, ENSMUSG00000016458, ENSMUSG00000022893, ENSMUSG00000022346, ENSMUSG00000056427	199	167	19596	4.71724	0.999356	0.0290076	0.0265081
GOTERM_BP_FAT	GO:0010927~cellular component assembly involved in morphogenesis	7	3.34928	0.00157536	ENSMUSG00000021798, ENSMUSG00000049382, ENSMUSG00000068699, ENSMUSG00000020911, ENSMUSG00000057003, ENSMUSG00000020186, ENSMUSG00000031972	199	123	19596	5.60412	0.999373	0.0290076	0.0265081
GOTERM_BP_FAT	GO:0051130~positive regulation of cellular component organization	29	13.8756	0.00163433	ENSMUSG00000031451, ENSMUSG00000052397, ENSMUSG00000040249, ENSMUSG00000023992, ENSMUSG00000022346, ENSMUSG00000047414, ENSMUSG00000021215, ENSMUSG00000030748, ENSMUSG00000035692, ENSMUSG00000020704, ENSMUSG00000052934, ENSMUSG00000036856, ENSMUSG00000031980, ENSMUSG00000078853, ENSMUSG00000055254, ENSMUSG00000049112, ENSMUSG00000000120, ENSMUSG00000025789, ENSMUSG00000022893, ENSMUSG00000025885,…	199	1533	19596	1.86282	0.999525	0.0299754	0.0273926
GOTERM_BP_FAT	GO:0051051~negative regulation of transport	15	7.17703	0.00164136	ENSMUSG00000055980, ENSMUSG00000049112, ENSMUSG00000048387, ENSMUSG00000040249, ENSMUSG00000022346, ENSMUSG00000042985, ENSMUSG00000024610, ENSMUSG00000040152, ENSMUSG00000020733, ENSMUSG00000032726, ENSMUSG00000038894, ENSMUSG00000017737, ENSMUSG00000057729, ENSMUSG00000034652, ENSMUSG00000019787	199	557	19596	2.65186	0.99954	0.0299868	0.027403
GOTERM_BP_FAT	GO:0051347~positive regulation of transferase activity	16	7.6555	0.00166218	ENSMUSG00000031451, ENSMUSG00000031980, ENSMUSG00000078853, ENSMUSG00000055254, ENSMUSG00000055980, ENSMUSG00000023992, ENSMUSG00000023046, ENSMUSG00000022346, ENSMUSG00000024621, ENSMUSG00000024610, ENSMUSG00000040152, ENSMUSG00000069874, ENSMUSG00000002602, ENSMUSG00000074345, ENSMUSG00000039533, ENSMUSG00000034652	199	621	19596	2.53713	0.999583	0.0302491	0.0276427
GOTERM_BP_FAT	GO:0007423~sensory organ development	17	8.13397	0.00167519	ENSMUSG00000036905, ENSMUSG00000028487, ENSMUSG00000057322, ENSMUSG00000055254, ENSMUSG00000048387, ENSMUSG00000028654, ENSMUSG00000027004, ENSMUSG00000044217, ENSMUSG00000022346, ENSMUSG00000020733, ENSMUSG00000067212, ENSMUSG00000016458, ENSMUSG00000073489, ENSMUSG00000074622, ENSMUSG00000071637, ENSMUSG00000039910, ENSMUSG00000035403	199	686	19596	2.44028	0.999608	0.0303677	0.027751
GOTERM_BP_FAT	GO:0072001~renal system development	12	5.74163	0.00169866	ENSMUSG00000036856, ENSMUSG00000031980, ENSMUSG00000024713, ENSMUSG00000025934, ENSMUSG00000048387, ENSMUSG00000016458, ENSMUSG00000045680, ENSMUSG00000017737, ENSMUSG00000043969, ENSMUSG00000022893, ENSMUSG00000032359, ENSMUSG00000022346	199	379	19596	3.11786	0.999648	0.0306743	0.0280312
GOTERM_BP_FAT	GO:1903901~negative regulation of viral life cycle	7	3.34928	0.00171035	ENSMUSG00000044786, ENSMUSG00000032661, ENSMUSG00000035042, ENSMUSG00000009185, ENSMUSG00000035692, ENSMUSG00000073489, ENSMUSG00000024610	199	125	19596	5.51445	0.999667	0.0307665	0.0281155
GOTERM_BP_FAT	GO:0009612~response to mechanical stimulus	10	4.78469	0.00175008	ENSMUSG00000040152, ENSMUSG00000038393, ENSMUSG00000031980, ENSMUSG00000005360, ENSMUSG00000020704, ENSMUSG00000021250, ENSMUSG00000033161, ENSMUSG00000031972, ENSMUSG00000039910, ENSMUSG00000022346	199	270	19596	3.64712	0.999724	0.0313606	0.0286584
GOTERM_BP_FAT	GO:0072088~nephron epithelium morphogenesis	6	2.87081	0.00179852	ENSMUSG00000036856, ENSMUSG00000031980, ENSMUSG00000048387, ENSMUSG00000016458, ENSMUSG00000045680, ENSMUSG00000022346	199	86	19596	6.87016	0.99978	0.0321056	0.0293392
GOTERM_BP_FAT	GO:1902531~regulation of intracellular signal transduction	33	15.7895	0.00180978	ENSMUSG00000031453, ENSMUSG00000031451, ENSMUSG00000032089, ENSMUSG00000052397, ENSMUSG00000040249, ENSMUSG00000023992, ENSMUSG00000028967, ENSMUSG00000022346, ENSMUSG00000025017, ENSMUSG00000024621, ENSMUSG00000021215, ENSMUSG00000020027, ENSMUSG00000074345, ENSMUSG00000039533, ENSMUSG00000019787, ENSMUSG00000031980, ENSMUSG00000018849, ENSMUSG00000055254, ENSMUSG00000023046, ENSMUSG00000000120,…	199	1850	19596	1.75653	0.999791	0.0321838	0.0294106
GOTERM_BP_FAT	GO:0032844~regulation of homeostatic process	15	7.17703	0.0018323	ENSMUSG00000054675, ENSMUSG00000031980, ENSMUSG00000031075, ENSMUSG00000040249, ENSMUSG00000000120, ENSMUSG00000022346, ENSMUSG00000022840, ENSMUSG00000024621, ENSMUSG00000024610, ENSMUSG00000044786, ENSMUSG00000027716, ENSMUSG00000035042, ENSMUSG00000035692, ENSMUSG00000074622, ENSMUSG00000019787	199	564	19596	2.61895	0.999812	0.0324609	0.0296638
GOTERM_BP_FAT	GO:0072567~chemokine (C-X-C motif) ligand 2 production	4	1.91388	0.00198356	ENSMUSG00000032661, ENSMUSG00000035042, ENSMUSG00000040249, ENSMUSG00000024610	199	25	19596	15.7556	0.999908	0.0343753	0.0314133
GOTERM_BP_FAT	GO:0061333~renal tubule morphogenesis	6	2.87081	0.00199062	ENSMUSG00000036856, ENSMUSG00000031980, ENSMUSG00000048387, ENSMUSG00000016458, ENSMUSG00000045680, ENSMUSG00000022346	199	88	19596	6.71402	0.999911	0.0343753	0.0314133
GOTERM_BP_FAT	GO:0042692~muscle cell differentiation	14	6.69856	0.00200644	ENSMUSG00000036856, ENSMUSG00000049382, ENSMUSG00000054675, ENSMUSG00000031980, ENSMUSG00000024042, ENSMUSG00000057003, ENSMUSG00000020186, ENSMUSG00000021798, ENSMUSG00000068699, ENSMUSG00000020911, ENSMUSG00000030748, ENSMUSG00000009185, ENSMUSG00000016458, ENSMUSG00000031972	199	507	19596	2.71916	0.999917	0.0343753	0.0314133
GOTERM_BP_FAT	GO:0032989~cellular component morphogenesis	25	11.9617	0.00197015	ENSMUSG00000049382, ENSMUSG00000005360, ENSMUSG00000052397, ENSMUSG00000057003, ENSMUSG00000040249, ENSMUSG00000020186, ENSMUSG00000024621, ENSMUSG00000047414, ENSMUSG00000021798, ENSMUSG00000021215, ENSMUSG00000068699, ENSMUSG00000052934, ENSMUSG00000031972, ENSMUSG00000037868, ENSMUSG00000055254, ENSMUSG00000000120, ENSMUSG00000025789, ENSMUSG00000025885, ENSMUSG00000041120, ENSMUSG00000047787,…	199	1255	19596	1.9616	0.999901	0.0343753	0.0314133
GOTERM_BP_FAT	GO:0030155~regulation of cell adhesion	19	9.09091	0.00194812	ENSMUSG00000036856, ENSMUSG00000058297, ENSMUSG00000040249, ENSMUSG00000060586, ENSMUSG00000041202, ENSMUSG00000024610, ENSMUSG00000040152, ENSMUSG00000021215, ENSMUSG00000024713, ENSMUSG00000036594, ENSMUSG00000035042, ENSMUSG00000030748, ENSMUSG00000067212, ENSMUSG00000037440, ENSMUSG00000056529, ENSMUSG00000073421, ENSMUSG00000034652, ENSMUSG00000037820, ENSMUSG00000039910	199	830	19596	2.25419	0.999891	0.0343753	0.0314133
GOTERM_BP_FAT	GO:0021782~glial cell development	7	3.34928	0.00200651	ENSMUSG00000031980, ENSMUSG00000055254, ENSMUSG00000036098, ENSMUSG00000040249, ENSMUSG00000023992, ENSMUSG00000024621, ENSMUSG00000036887	199	129	19596	5.34346	0.999917	0.0343753	0.0314133
GOTERM_BP_FAT	GO:0014065~phosphatidylinositol 3-kinase signaling	7	3.34928	0.00200651	ENSMUSG00000031980, ENSMUSG00000020733, ENSMUSG00000035042, ENSMUSG00000055254, ENSMUSG00000055980, ENSMUSG00000023992, ENSMUSG00000025017	199	129	19596	5.34346	0.999917	0.0343753	0.0314133
GOTERM_BP_FAT	GO:0008585~female gonad development	7	3.34928	0.00200651	ENSMUSG00000036856, ENSMUSG00000031980, ENSMUSG00000031870, ENSMUSG00000016458, ENSMUSG00000022893, ENSMUSG00000022346, ENSMUSG00000056427	199	129	19596	5.34346	0.999917	0.0343753	0.0314133
GOTERM_BP_FAT	GO:0002544~chronic inflammatory response	4	1.91388	0.00198356	ENSMUSG00000040152, ENSMUSG00000048087, ENSMUSG00000037440, ENSMUSG00000027597	199	25	19596	15.7556	0.999908	0.0343753	0.0314133
GOTERM_BP_FAT	GO:1901699~cellular response to nitrogen compound	19	9.09091	0.00202589	ENSMUSG00000031980, ENSMUSG00000005360, ENSMUSG00000031075, ENSMUSG00000052397, ENSMUSG00000055254, ENSMUSG00000055980, ENSMUSG00000040249, ENSMUSG00000023992, ENSMUSG00000000120, ENSMUSG00000028967, ENSMUSG00000022346, ENSMUSG00000040152, ENSMUSG00000015340, ENSMUSG00000020027, ENSMUSG00000019970, ENSMUSG00000056529, ENSMUSG00000038894, ENSMUSG00000037820, ENSMUSG00000031972	199	833	19596	2.24607	0.999924	0.034487	0.0315154
GOTERM_BP_FAT	GO:0051604~protein maturation	11	5.26316	0.00202778	ENSMUSG00000040152, ENSMUSG00000024713, ENSMUSG00000038156, ENSMUSG00000036098, ENSMUSG00000036596, ENSMUSG00000023992, ENSMUSG00000038642, ENSMUSG00000074622, ENSMUSG00000073489, ENSMUSG00000032359, ENSMUSG00000022346	199	331	19596	3.2725	0.999925	0.034487	0.0315154
GOTERM_BP_FAT	GO:0097190~apoptotic signaling pathway	16	7.6555	0.00206122	ENSMUSG00000036856, ENSMUSG00000049382, ENSMUSG00000031980, ENSMUSG00000017969, ENSMUSG00000023992, ENSMUSG00000027322, ENSMUSG00000000120, ENSMUSG00000022346, ENSMUSG00000024610, ENSMUSG00000040152, ENSMUSG00000020733, ENSMUSG00000037440, ENSMUSG00000017737, ENSMUSG00000073489, ENSMUSG00000032359, ENSMUSG00000030730	199	635	19596	2.48119	0.999936	0.0345532	0.0315759
GOTERM_BP_FAT	GO:0051336~regulation of hydrolase activity	24	11.4833	0.00205095	ENSMUSG00000031453, ENSMUSG00000033763, ENSMUSG00000036856, ENSMUSG00000031451, ENSMUSG00000032661, ENSMUSG00000031980, ENSMUSG00000055254, ENSMUSG00000040249, ENSMUSG00000000120, ENSMUSG00000022346, ENSMUSG00000042842, ENSMUSG00000040152, ENSMUSG00000021215, ENSMUSG00000035042, ENSMUSG00000009185, ENSMUSG00000056529, ENSMUSG00000017737, ENSMUSG00000073489, ENSMUSG00000057729, ENSMUSG00000034652,…	199	1186	19596	1.9927	0.999933	0.0345532	0.0315759
GOTERM_BP_FAT	GO:0032270~positive regulation of cellular protein metabolic process	31	14.8325	0.00205544	ENSMUSG00000031451, ENSMUSG00000054675, ENSMUSG00000052397, ENSMUSG00000086962, ENSMUSG00000040249, ENSMUSG00000023992, ENSMUSG00000022346, ENSMUSG00000024621, ENSMUSG00000032726, ENSMUSG00000074345, ENSMUSG00000039533, ENSMUSG00000031980, ENSMUSG00000028871, ENSMUSG00000018849, ENSMUSG00000078853, ENSMUSG00000055254, ENSMUSG00000023046, ENSMUSG00000000120, ENSMUSG00000024610, ENSMUSG00000040152,…	199	1710	19596	1.78517	0.999934	0.0345532	0.0315759
GOTERM_BP_FAT	GO:0002221~pattern recognition receptor signaling pathway	8	3.82775	0.00204714	ENSMUSG00000069874, ENSMUSG00000032661, ENSMUSG00000078853, ENSMUSG00000026938, ENSMUSG00000023992, ENSMUSG00000034652, ENSMUSG00000025017, ENSMUSG00000021356	199	175	19596	4.50159	0.999931	0.0345532	0.0315759
GOTERM_BP_FAT	GO:0072028~nephron morphogenesis	6	2.87081	0.0020921	ENSMUSG00000036856, ENSMUSG00000031980, ENSMUSG00000048387, ENSMUSG00000016458, ENSMUSG00000045680, ENSMUSG00000022346	199	89	19596	6.63859	0.999944	0.0349455	0.0319344
GOTERM_BP_FAT	GO:0007179~transforming growth factor beta receptor signaling pathway	8	3.82775	0.00225523	ENSMUSG00000040152, ENSMUSG00000034612, ENSMUSG00000029860, ENSMUSG00000021250, ENSMUSG00000032726, ENSMUSG00000040249, ENSMUSG00000006205, ENSMUSG00000039910	199	178	19596	4.42572	0.999974	0.0375364	0.034302
GOTERM_BP_FAT	GO:0042592~homeostatic process	35	16.7464	0.00230644	ENSMUSG00000031451, ENSMUSG00000054675, ENSMUSG00000031075, ENSMUSG00000005360, ENSMUSG00000027593, ENSMUSG00000040249, ENSMUSG00000023992, ENSMUSG00000021396, ENSMUSG00000022346, ENSMUSG00000022840, ENSMUSG00000024621, ENSMUSG00000044786, ENSMUSG00000027716, ENSMUSG00000035692, ENSMUSG00000032726, ENSMUSG00000074622, ENSMUSG00000038642, ENSMUSG00000039910, ENSMUSG00000019787, ENSMUSG00000031980,…	199	2036	19596	1.6928	0.99998	0.0382526	0.0349565
GOTERM_BP_FAT	GO:0016064~immunoglobulin mediated immune response	11	5.26316	0.0023839	ENSMUSG00000073418, ENSMUSG00000036905, ENSMUSG00000036594, ENSMUSG00000030748, ENSMUSG00000067212, ENSMUSG00000073421, ENSMUSG00000023992, ENSMUSG00000060586, ENSMUSG00000036896, ENSMUSG00000036887, ENSMUSG00000024610	199	338	19596	3.20472	0.999986	0.0393975	0.0360028
GOTERM_BP_FAT	GO:0046545~development of primary female sexual characteristics	7	3.34928	0.00242942	ENSMUSG00000036856, ENSMUSG00000031980, ENSMUSG00000031870, ENSMUSG00000016458, ENSMUSG00000022893, ENSMUSG00000022346, ENSMUSG00000056427	199	134	19596	5.14408	0.999989	0.0400084	0.0365611
GOTERM_BP_FAT	GO:0070372~regulation of ERK1 and ERK2 cascade	11	5.26316	0.00248563	ENSMUSG00000031451, ENSMUSG00000020733, ENSMUSG00000052397, ENSMUSG00000035042, ENSMUSG00000009185, ENSMUSG00000074345, ENSMUSG00000040249, ENSMUSG00000023992, ENSMUSG00000028967, ENSMUSG00000024621, ENSMUSG00000024610	199	340	19596	3.18587	0.999991	0.0406479	0.0371454
GOTERM_BP_FAT	GO:0006883~cellular sodium ion homeostasis	4	1.91388	0.00248545	ENSMUSG00000019970, ENSMUSG00000031980, ENSMUSG00000005360, ENSMUSG00000033161	199	27	19596	14.5885	0.999991	0.0406479	0.0371454
GOTERM_BP_FAT	GO:0006796~phosphate-containing compound metabolic process	49	23.445	0.00251591	ENSMUSG00000035835, ENSMUSG00000054675, ENSMUSG00000040026, ENSMUSG00000022840, ENSMUSG00000024621, ENSMUSG00000044786, ENSMUSG00000020027, ENSMUSG00000032726, ENSMUSG00000031980, ENSMUSG00000055254, ENSMUSG00000023046, ENSMUSG00000024610, ENSMUSG00000019235, ENSMUSG00000020733, ENSMUSG00000002602, ENSMUSG00000038894, ENSMUSG00000034573, ENSMUSG00000030854, ENSMUSG00000017737, ENSMUSG00000034652,…	199	3197	19596	1.50927	0.999992	0.0409997	0.0374669
GOTERM_BP_FAT	GO:0051607~defense response to virus	10	4.78469	0.00260782	ENSMUSG00000040264, ENSMUSG00000032661, ENSMUSG00000035042, ENSMUSG00000033450, ENSMUSG00000035692, ENSMUSG00000037379, ENSMUSG00000062488, ENSMUSG00000073489, ENSMUSG00000006205, ENSMUSG00000027514	199	286	19596	3.44309	0.999995	0.0423499	0.0387008
GOTERM_BP_FAT	GO:0019724~B cell mediated immunity	11	5.26316	0.002673	ENSMUSG00000073418, ENSMUSG00000036905, ENSMUSG00000036594, ENSMUSG00000030748, ENSMUSG00000067212, ENSMUSG00000073421, ENSMUSG00000023992, ENSMUSG00000060586, ENSMUSG00000036896, ENSMUSG00000036887, ENSMUSG00000024610	199	343	19596	3.15801	0.999996	0.0432581	0.0395307
GOTERM_BP_FAT	GO:2001012~mesenchymal cell differentiation involved in renal system development	3	1.43541	0.0027326	ENSMUSG00000036856, ENSMUSG00000048387, ENSMUSG00000045680	199	8	19596	36.9271	0.999997	0.0436191	0.0398606
GOTERM_BP_FAT	GO:0072161~mesenchymal cell differentiation involved in kidney development	3	1.43541	0.0027326	ENSMUSG00000036856, ENSMUSG00000048387, ENSMUSG00000045680	199	8	19596	36.9271	0.999997	0.0436191	0.0398606
GOTERM_BP_FAT	GO:0061762~CAMKK-AMPK signaling cascade	3	1.43541	0.0027326	ENSMUSG00000069874, ENSMUSG00000078853, ENSMUSG00000023992	199	8	19596	36.9271	0.999997	0.0436191	0.0398606
GOTERM_BP_FAT	GO:0042698~ovulation cycle	7	3.34928	0.00271343	ENSMUSG00000031980, ENSMUSG00000031870, ENSMUSG00000002602, ENSMUSG00000049112, ENSMUSG00000022893, ENSMUSG00000022346, ENSMUSG00000056427	199	137	19596	5.03143	0.999997	0.0436191	0.0398606
GOTERM_BP_FAT	GO:2000341~regulation of chemokine (C-X-C motif) ligand 2 production	4	1.91388	0.00276316	ENSMUSG00000032661, ENSMUSG00000035042, ENSMUSG00000040249, ENSMUSG00000024610	199	28	19596	14.0675	0.999998	0.0438078	0.0400331
GOTERM_BP_FAT	GO:0030728~ovulation	4	1.91388	0.00276316	ENSMUSG00000031980, ENSMUSG00000031870, ENSMUSG00000022893, ENSMUSG00000022346	199	28	19596	14.0675	0.999998	0.0438078	0.0400331
GOTERM_BP_FAT	GO:0019058~viral life cycle	11	5.26316	0.00278091	ENSMUSG00000044786, ENSMUSG00000031451, ENSMUSG00000032661, ENSMUSG00000024713, ENSMUSG00000002602, ENSMUSG00000035042, ENSMUSG00000009185, ENSMUSG00000035692, ENSMUSG00000027322, ENSMUSG00000073489, ENSMUSG00000024610	199	345	19596	3.1397	0.999998	0.0439402	0.040154
GOTERM_BP_FAT	GO:0030595~leukocyte chemotaxis	9	4.30622	0.00281247	ENSMUSG00000040152, ENSMUSG00000041120, ENSMUSG00000031451, ENSMUSG00000035042, ENSMUSG00000009185, ENSMUSG00000002897, ENSMUSG00000024621, ENSMUSG00000024610, ENSMUSG00000018920	199	236	19596	3.7553	0.999998	0.0442893	0.040473
GOTERM_BP_FAT	GO:0002758~innate immune response-activating signal transduction	8	3.82775	0.00288345	ENSMUSG00000069874, ENSMUSG00000032661, ENSMUSG00000078853, ENSMUSG00000026938, ENSMUSG00000023992, ENSMUSG00000034652, ENSMUSG00000025017, ENSMUSG00000021356	199	186	19596	4.23537	0.999999	0.0451873	0.0412936
GOTERM_BP_FAT	GO:0002443~leukocyte mediated immunity	16	7.6555	0.00288882	ENSMUSG00000036905, ENSMUSG00000023992, ENSMUSG00000060586, ENSMUSG00000024610, ENSMUSG00000073418, ENSMUSG00000036594, ENSMUSG00000030748, ENSMUSG00000067212, ENSMUSG00000056529, ENSMUSG00000037321, ENSMUSG00000073421, ENSMUSG00000037379, ENSMUSG00000034652, ENSMUSG00000036896, ENSMUSG00000032359, ENSMUSG00000036887	199	658	19596	2.39446	0.999999	0.0451873	0.0412936
GOTERM_BP_FAT	GO:2001235~positive regulation of apoptotic signaling pathway	8	3.82775	0.00305967	ENSMUSG00000040152, ENSMUSG00000031980, ENSMUSG00000020733, ENSMUSG00000017737, ENSMUSG00000027322, ENSMUSG00000000120, ENSMUSG00000032359, ENSMUSG00000022346	199	188	19596	4.19031	0.999999	0.0477003	0.0435902
GOTERM_BP_FAT	GO:0051046~regulation of secretion	18	8.61244	0.0031087	ENSMUSG00000031980, ENSMUSG00000031075, ENSMUSG00000052397, ENSMUSG00000055254, ENSMUSG00000055980, ENSMUSG00000049112, ENSMUSG00000040249, ENSMUSG00000023992, ENSMUSG00000025885, ENSMUSG00000022840, ENSMUSG00000024610, ENSMUSG00000020733, ENSMUSG00000035042, ENSMUSG00000030748, ENSMUSG00000056529, ENSMUSG00000032726, ENSMUSG00000038894, ENSMUSG00000034652	199	798	19596	2.22118	1	0.0483037	0.0441415
GOTERM_BP_FAT	GO:0006869~lipid transport	12	5.74163	0.00313076	ENSMUSG00000040152, ENSMUSG00000068246, ENSMUSG00000057346, ENSMUSG00000031980, ENSMUSG00000020733, ENSMUSG00000056870, ENSMUSG00000074345, ENSMUSG00000040249, ENSMUSG00000023992, ENSMUSG00000038894, ENSMUSG00000090698, ENSMUSG00000041202	199	410	19596	2.88212	1	0.0484854	0.0443076
GOTERM_BP_FAT	GO:0002028~regulation of sodium ion transport	6	2.87081	0.00332489	ENSMUSG00000019970, ENSMUSG00000020733, ENSMUSG00000024042, ENSMUSG00000027574, ENSMUSG00000048387, ENSMUSG00000033161	199	99	19596	5.96802	1	0.0511837	0.0467734
GOTERM_BP_FAT	GO:0001932~regulation of protein phosphorylation	28	13.3971	0.00332689	ENSMUSG00000031451, ENSMUSG00000054675, ENSMUSG00000052397, ENSMUSG00000086962, ENSMUSG00000040249, ENSMUSG00000023992, ENSMUSG00000028967, ENSMUSG00000024621, ENSMUSG00000032726, ENSMUSG00000074345, ENSMUSG00000039533, ENSMUSG00000031980, ENSMUSG00000028871, ENSMUSG00000018849, ENSMUSG00000078853, ENSMUSG00000055254, ENSMUSG00000023046, ENSMUSG00000000120, ENSMUSG00000024610, ENSMUSG00000040152,…	199	1534	19596	1.79741	1	0.0511837	0.0467734
GOTERM_BP_FAT	GO:0061005~cell differentiation involved in kidney development	5	2.39234	0.00336689	ENSMUSG00000036856, ENSMUSG00000048387, ENSMUSG00000016458, ENSMUSG00000045680, ENSMUSG00000017737	199	61	19596	8.07151	1	0.0516293	0.0471806
GOTERM_BP_FAT	GO:0022409~positive regulation of cell-cell adhesion	10	4.78469	0.00339318	ENSMUSG00000036594, ENSMUSG00000035042, ENSMUSG00000030748, ENSMUSG00000067212, ENSMUSG00000037440, ENSMUSG00000056529, ENSMUSG00000073421, ENSMUSG00000060586, ENSMUSG00000039910, ENSMUSG00000024610	199	298	19596	3.30444	1	0.0518624	0.0473936
GOTERM_BP_FAT	GO:0006812~cation transport	23	11.0048	0.00342712	ENSMUSG00000031451, ENSMUSG00000031980, ENSMUSG00000005360, ENSMUSG00000031075, ENSMUSG00000024042, ENSMUSG00000027574, ENSMUSG00000048387, ENSMUSG00000033161, ENSMUSG00000023992, ENSMUSG00000023243, ENSMUSG00000019970, ENSMUSG00000027716, ENSMUSG00000050856, ENSMUSG00000020733, ENSMUSG00000089774, ENSMUSG00000035042, ENSMUSG00000009185, ENSMUSG00000020704, ENSMUSG00000017737, ENSMUSG00000038642,…	199	1162	19596	1.94911	1	0.0522106	0.0477118
GOTERM_BP_FAT	GO:1905039~carboxylic acid transmembrane transport	6	2.87081	0.00347173	ENSMUSG00000040152, ENSMUSG00000031980, ENSMUSG00000005360, ENSMUSG00000048387, ENSMUSG00000038894, ENSMUSG00000022346	199	100	19596	5.90834	1	0.0523784	0.0478651
GOTERM_BP_FAT	GO:0002460~adaptive immune response based on somatic recombination of immune receptors built from immunoglobulin superfamily domains	14	6.69856	0.00345212	ENSMUSG00000036905, ENSMUSG00000023992, ENSMUSG00000002897, ENSMUSG00000060586, ENSMUSG00000021356, ENSMUSG00000024610, ENSMUSG00000073418, ENSMUSG00000036594, ENSMUSG00000030748, ENSMUSG00000067212, ENSMUSG00000073421, ENSMUSG00000036896, ENSMUSG00000032359, ENSMUSG00000036887	199	540	19596	2.55299	1	0.0523784	0.0478651
GOTERM_BP_FAT	GO:0001656~metanephros development	6	2.87081	0.00347173	ENSMUSG00000036856, ENSMUSG00000048387, ENSMUSG00000016458, ENSMUSG00000045680, ENSMUSG00000032359, ENSMUSG00000022346	199	100	19596	5.90834	1	0.0523784	0.0478651
GOTERM_BP_FAT	GO:0072239~metanephric glomerulus vasculature development	3	1.43541	0.00349003	ENSMUSG00000048387, ENSMUSG00000016458, ENSMUSG00000045680	199	9	19596	32.8241	1	0.0524851	0.0479627
GOTERM_BP_FAT	GO:0043270~positive regulation of ion transport	11	5.26316	0.00351253	ENSMUSG00000027716, ENSMUSG00000019970, ENSMUSG00000031980, ENSMUSG00000020733, ENSMUSG00000035042, ENSMUSG00000020704, ENSMUSG00000056529, ENSMUSG00000023992, ENSMUSG00000038642, ENSMUSG00000019787, ENSMUSG00000030730	199	357	19596	3.03416	1	0.0526541	0.0481171
GOTERM_BP_FAT	GO:1903825~organic acid transmembrane transport	6	2.87081	0.00362318	ENSMUSG00000040152, ENSMUSG00000031980, ENSMUSG00000005360, ENSMUSG00000048387, ENSMUSG00000038894, ENSMUSG00000022346	199	101	19596	5.84984	1	0.0541393	0.0494743
GOTERM_BP_FAT	GO:0048514~blood vessel morphogenesis	16	7.6555	0.00366307	ENSMUSG00000036856, ENSMUSG00000031980, ENSMUSG00000017969, ENSMUSG00000055254, ENSMUSG00000040249, ENSMUSG00000000120, ENSMUSG00000022893, ENSMUSG00000040152, ENSMUSG00000015340, ENSMUSG00000035042, ENSMUSG00000016458, ENSMUSG00000045680, ENSMUSG00000017737, ENSMUSG00000090698, ENSMUSG00000032359, ENSMUSG00000039910	199	675	19596	2.33416	1	0.0543879	0.0497015
GOTERM_BP_FAT	GO:0001775~cell activation	25	11.9617	0.00365973	ENSMUSG00000031451, ENSMUSG00000040249, ENSMUSG00000023992, ENSMUSG00000002897, ENSMUSG00000021356, ENSMUSG00000030748, ENSMUSG00000090698, ENSMUSG00000074622, ENSMUSG00000036887, ENSMUSG00000036856, ENSMUSG00000031980, ENSMUSG00000051495, ENSMUSG00000060586, ENSMUSG00000041202, ENSMUSG00000024610, ENSMUSG00000040152, ENSMUSG00000002602, ENSMUSG00000035042, ENSMUSG00000036594, ENSMUSG00000067212,…	199	1317	19596	1.86926	1	0.0543879	0.0497015
GOTERM_BP_FAT	GO:1905523~positive regulation of macrophage migration	4	1.91388	0.00370809	ENSMUSG00000040152, ENSMUSG00000035042, ENSMUSG00000023992, ENSMUSG00000024621	199	31	19596	12.7061	1	0.054709	0.0499949
GOTERM_BP_FAT	GO:1904752~regulation of vascular associated smooth muscle cell migration	4	1.91388	0.00370809	ENSMUSG00000031980, ENSMUSG00000024713, ENSMUSG00000040249, ENSMUSG00000022893	199	31	19596	12.7061	1	0.054709	0.0499949
GOTERM_BP_FAT	GO:0071887~leukocyte apoptotic process	7	3.34928	0.00385185	ENSMUSG00000031451, ENSMUSG00000002602, ENSMUSG00000035042, ENSMUSG00000038894, ENSMUSG00000027322, ENSMUSG00000022346, ENSMUSG00000024610	199	147	19596	4.68916	1	0.0566513	0.0517699
GOTERM_BP_FAT	GO:0043900~regulation of multi-organism process	13	6.2201	0.00389317	ENSMUSG00000032661, ENSMUSG00000028871, ENSMUSG00000049112, ENSMUSG00000006205, ENSMUSG00000024621, ENSMUSG00000024610, ENSMUSG00000044786, ENSMUSG00000002602, ENSMUSG00000035042, ENSMUSG00000009185, ENSMUSG00000035692, ENSMUSG00000056529, ENSMUSG00000073489	199	484	19596	2.64492	1	0.0570794	0.0521611
GOTERM_BP_FAT	GO:0045666~positive regulation of neuron differentiation	13	6.2201	0.00394637	ENSMUSG00000031980, ENSMUSG00000055254, ENSMUSG00000040249, ENSMUSG00000000120, ENSMUSG00000022893, ENSMUSG00000025885, ENSMUSG00000041120, ENSMUSG00000020027, ENSMUSG00000019970, ENSMUSG00000035042, ENSMUSG00000030854, ENSMUSG00000039533, ENSMUSG00000052934	199	485	19596	2.63947	1	0.0574989	0.0525444
GOTERM_BP_FAT	GO:0001655~urogenital system development	12	5.74163	0.00394278	ENSMUSG00000036856, ENSMUSG00000031980, ENSMUSG00000024713, ENSMUSG00000025934, ENSMUSG00000048387, ENSMUSG00000016458, ENSMUSG00000045680, ENSMUSG00000017737, ENSMUSG00000043969, ENSMUSG00000022893, ENSMUSG00000032359, ENSMUSG00000022346	199	423	19596	2.79354	1	0.0574989	0.0525444
GOTERM_BP_FAT	GO:0032409~regulation of transporter activity	10	4.78469	0.00398358	ENSMUSG00000020733, ENSMUSG00000089774, ENSMUSG00000020704, ENSMUSG00000056529, ENSMUSG00000048387, ENSMUSG00000017737, ENSMUSG00000023992, ENSMUSG00000038642, ENSMUSG00000019787, ENSMUSG00000030730	199	305	19596	3.2286	1	0.0578608	0.0528752
GOTERM_BP_FAT	GO:0071560~cellular response to transforming growth factor beta stimulus	9	4.30622	0.00400874	ENSMUSG00000040152, ENSMUSG00000034612, ENSMUSG00000036856, ENSMUSG00000029860, ENSMUSG00000021250, ENSMUSG00000032726, ENSMUSG00000040249, ENSMUSG00000006205, ENSMUSG00000039910	199	250	19596	3.54501	1	0.0580461	0.0530445
GOTERM_BP_FAT	GO:0002250~adaptive immune response	17	8.13397	0.00403544	ENSMUSG00000036905, ENSMUSG00000023992, ENSMUSG00000002897, ENSMUSG00000060586, ENSMUSG00000004730, ENSMUSG00000021356, ENSMUSG00000024610, ENSMUSG00000073418, ENSMUSG00000036594, ENSMUSG00000030748, ENSMUSG00000067212, ENSMUSG00000037321, ENSMUSG00000073421, ENSMUSG00000038642, ENSMUSG00000036896, ENSMUSG00000032359, ENSMUSG00000036887	199	750	19596	2.23204	1	0.0582524	0.053233
GOTERM_BP_FAT	GO:0090287~regulation of cellular response to growth factor stimulus	10	4.78469	0.00404928	ENSMUSG00000040152, ENSMUSG00000034612, ENSMUSG00000041120, ENSMUSG00000036856, ENSMUSG00000031980, ENSMUSG00000040249, ENSMUSG00000000120, ENSMUSG00000006205, ENSMUSG00000039910, ENSMUSG00000035403	199	306	19596	3.21805	1	0.0582723	0.0532512
GOTERM_BP_FAT	GO:1903039~positive regulation of leukocyte cell-cell adhesion	9	4.30622	0.00409417	ENSMUSG00000036594, ENSMUSG00000035042, ENSMUSG00000030748, ENSMUSG00000067212, ENSMUSG00000037440, ENSMUSG00000056529, ENSMUSG00000073421, ENSMUSG00000060586, ENSMUSG00000024610	199	251	19596	3.53088	1	0.0585471	0.0535023
GOTERM_BP_FAT	GO:0072080~nephron tubule development	6	2.87081	0.00410594	ENSMUSG00000036856, ENSMUSG00000031980, ENSMUSG00000048387, ENSMUSG00000016458, ENSMUSG00000045680, ENSMUSG00000022346	199	104	19596	5.6811	1	0.0585471	0.0535023
GOTERM_BP_FAT	GO:0044236~multicellular organism metabolic process	7	3.34928	0.00410196	ENSMUSG00000036856, ENSMUSG00000032726, ENSMUSG00000017737, ENSMUSG00000057729, ENSMUSG00000038642, ENSMUSG00000006931, ENSMUSG00000028967	199	149	19596	4.62622	1	0.0585471	0.0535023
GOTERM_BP_FAT	GO:1903532~positive regulation of secretion by cell	11	5.26316	0.00415205	ENSMUSG00000031980, ENSMUSG00000031075, ENSMUSG00000052397, ENSMUSG00000030748, ENSMUSG00000049112, ENSMUSG00000055980, ENSMUSG00000056529, ENSMUSG00000040249, ENSMUSG00000023992, ENSMUSG00000038894, ENSMUSG00000025885	199	366	19596	2.95955	1	0.0587517	0.0536893
GOTERM_BP_FAT	GO:0034767~positive regulation of ion transmembrane transport	8	3.82775	0.00418309	ENSMUSG00000031980, ENSMUSG00000020733, ENSMUSG00000020704, ENSMUSG00000056529, ENSMUSG00000023992, ENSMUSG00000038642, ENSMUSG00000019787, ENSMUSG00000030730	199	199	19596	3.95869	1	0.0587517	0.0536893
GOTERM_BP_FAT	GO:0008284~positive regulation of cell proliferation	22	10.5263	0.0041786	ENSMUSG00000031451, ENSMUSG00000031870, ENSMUSG00000054675, ENSMUSG00000031980, ENSMUSG00000055254, ENSMUSG00000055980, ENSMUSG00000048387, ENSMUSG00000000120, ENSMUSG00000022893, ENSMUSG00000006205, ENSMUSG00000022346, ENSMUSG00000024621, ENSMUSG00000024610, ENSMUSG00000040152, ENSMUSG00000035042, ENSMUSG00000067212, ENSMUSG00000056529, ENSMUSG00000032725, ENSMUSG00000038894, ENSMUSG00000017737,…	199	1108	19596	1.95523	1	0.0587517	0.0536893
GOTERM_BP_FAT	GO:0007565~female pregnancy	9	4.30622	0.00416834	ENSMUSG00000036856, ENSMUSG00000031980, ENSMUSG00000024713, ENSMUSG00000031870, ENSMUSG00000017969, ENSMUSG00000049112, ENSMUSG00000021250, ENSMUSG00000017737, ENSMUSG00000039910	199	252	19596	3.51687	1	0.0587517	0.0536893
GOTERM_BP_FAT	GO:0001822~kidney development	11	5.26316	0.00415205	ENSMUSG00000036856, ENSMUSG00000031980, ENSMUSG00000024713, ENSMUSG00000025934, ENSMUSG00000048387, ENSMUSG00000016458, ENSMUSG00000045680, ENSMUSG00000017737, ENSMUSG00000022893, ENSMUSG00000032359, ENSMUSG00000022346	199	366	19596	2.95955	1	0.0587517	0.0536893
GOTERM_BP_FAT	GO:0006793~phosphorus metabolic process	49	23.445	0.00423684	ENSMUSG00000035835, ENSMUSG00000054675, ENSMUSG00000040026, ENSMUSG00000022840, ENSMUSG00000024621, ENSMUSG00000044786, ENSMUSG00000020027, ENSMUSG00000032726, ENSMUSG00000031980, ENSMUSG00000055254, ENSMUSG00000023046, ENSMUSG00000024610, ENSMUSG00000019235, ENSMUSG00000020733, ENSMUSG00000002602, ENSMUSG00000038894, ENSMUSG00000034573, ENSMUSG00000030854, ENSMUSG00000017737, ENSMUSG00000034652,…	199	3281	19596	1.47063	1	0.0591513	0.0540545
GOTERM_BP_FAT	GO:0001658~branching involved in ureteric bud morphogenesis	5	2.39234	0.00423378	ENSMUSG00000036856, ENSMUSG00000031980, ENSMUSG00000016458, ENSMUSG00000045680, ENSMUSG00000022346	199	65	19596	7.5748	1	0.0591513	0.0540545
GOTERM_BP_FAT	GO:1901653~cellular response to peptide	11	5.26316	0.00425446	ENSMUSG00000020027, ENSMUSG00000019970, ENSMUSG00000031980, ENSMUSG00000031075, ENSMUSG00000055980, ENSMUSG00000040249, ENSMUSG00000023992, ENSMUSG00000038894, ENSMUSG00000000120, ENSMUSG00000028967, ENSMUSG00000022346	199	367	19596	2.95149	1	0.0592206	0.0541178
GOTERM_BP_FAT	GO:0051345~positive regulation of hydrolase activity	16	7.6555	0.0043063	ENSMUSG00000031453, ENSMUSG00000033763, ENSMUSG00000036856, ENSMUSG00000031980, ENSMUSG00000000120, ENSMUSG00000022346, ENSMUSG00000021215, ENSMUSG00000035042, ENSMUSG00000009185, ENSMUSG00000056529, ENSMUSG00000073489, ENSMUSG00000057729, ENSMUSG00000034652, ENSMUSG00000032359, ENSMUSG00000037820, ENSMUSG00000030730	199	687	19596	2.29339	1	0.0592771	0.0541694
GOTERM_BP_FAT	GO:0051050~positive regulation of transport	22	10.5263	0.00430922	ENSMUSG00000031451, ENSMUSG00000031980, ENSMUSG00000031075, ENSMUSG00000052397, ENSMUSG00000055980, ENSMUSG00000049112, ENSMUSG00000040249, ENSMUSG00000023992, ENSMUSG00000025885, ENSMUSG00000019970, ENSMUSG00000027716, ENSMUSG00000020733, ENSMUSG00000002602, ENSMUSG00000035042, ENSMUSG00000030748, ENSMUSG00000020704, ENSMUSG00000056529, ENSMUSG00000038894, ENSMUSG00000030854, ENSMUSG00000038642,…	199	1111	19596	1.94995	1	0.0592771	0.0541694
GOTERM_BP_FAT	GO:0048732~gland development	14	6.69856	0.00428008	ENSMUSG00000036856, ENSMUSG00000034009, ENSMUSG00000031870, ENSMUSG00000055980, ENSMUSG00000027004, ENSMUSG00000022346, ENSMUSG00000020027, ENSMUSG00000020733, ENSMUSG00000016458, ENSMUSG00000045680, ENSMUSG00000038894, ENSMUSG00000074622, ENSMUSG00000037820, ENSMUSG00000039910	199	554	19596	2.48847	1	0.0592771	0.0541694
GOTERM_BP_FAT	GO:0032944~regulation of mononuclear cell proliferation	9	4.30622	0.00428551	ENSMUSG00000036594, ENSMUSG00000035042, ENSMUSG00000067212, ENSMUSG00000073421, ENSMUSG00000038894, ENSMUSG00000034652, ENSMUSG00000041202, ENSMUSG00000024621, ENSMUSG00000024610	199	253	19596	3.50297	1	0.0592771	0.0541694
GOTERM_BP_FAT	GO:0099004~calmodulin dependent kinase signaling pathway	3	1.43541	0.00433361	ENSMUSG00000069874, ENSMUSG00000078853, ENSMUSG00000023992	199	10	19596	29.5417	1	0.0594061	0.0542873
GOTERM_BP_FAT	GO:0051247~positive regulation of protein metabolic process	31	14.8325	0.004344	ENSMUSG00000031451, ENSMUSG00000054675, ENSMUSG00000052397, ENSMUSG00000086962, ENSMUSG00000040249, ENSMUSG00000023992, ENSMUSG00000022346, ENSMUSG00000024621, ENSMUSG00000032726, ENSMUSG00000074345, ENSMUSG00000039533, ENSMUSG00000031980, ENSMUSG00000028871, ENSMUSG00000018849, ENSMUSG00000078853, ENSMUSG00000055254, ENSMUSG00000023046, ENSMUSG00000000120, ENSMUSG00000024610, ENSMUSG00000040152,…	199	1799	19596	1.69686	1	0.0594061	0.0542873
GOTERM_BP_FAT	GO:0034766~negative regulation of ion transmembrane transport	6	2.87081	0.00445226	ENSMUSG00000040152, ENSMUSG00000020733, ENSMUSG00000048387, ENSMUSG00000017737, ENSMUSG00000038894, ENSMUSG00000019787	199	106	19596	5.57391	1	0.060709	0.055478
GOTERM_BP_FAT	GO:0071559~response to transforming growth factor beta	9	4.30622	0.0044981	ENSMUSG00000040152, ENSMUSG00000034612, ENSMUSG00000036856, ENSMUSG00000029860, ENSMUSG00000021250, ENSMUSG00000032726, ENSMUSG00000040249, ENSMUSG00000006205, ENSMUSG00000039910	199	255	19596	3.4755	1	0.0610833	0.05582
GOTERM_BP_FAT	GO:0050792~regulation of viral process	10	4.78469	0.00450582	ENSMUSG00000044786, ENSMUSG00000032661, ENSMUSG00000002602, ENSMUSG00000035042, ENSMUSG00000009185, ENSMUSG00000035692, ENSMUSG00000073489, ENSMUSG00000006205, ENSMUSG00000024621, ENSMUSG00000024610	199	311	19596	3.16631	1	0.0610833	0.05582
GOTERM_BP_FAT	GO:0030855~epithelial cell differentiation	17	8.13397	0.0045212	ENSMUSG00000036856, ENSMUSG00000031870, ENSMUSG00000031980, ENSMUSG00000052397, ENSMUSG00000048387, ENSMUSG00000028654, ENSMUSG00000027004, ENSMUSG00000028967, ENSMUSG00000044786, ENSMUSG00000038393, ENSMUSG00000020733, ENSMUSG00000020911, ENSMUSG00000016458, ENSMUSG00000045680, ENSMUSG00000017737, ENSMUSG00000090698, ENSMUSG00000074622	199	759	19596	2.20557	1	0.0611145	0.0558485
GOTERM_BP_FAT	GO:0031348~negative regulation of defense response	9	4.30622	0.0045729	ENSMUSG00000044786, ENSMUSG00000032661, ENSMUSG00000017969, ENSMUSG00000067212, ENSMUSG00000035692, ENSMUSG00000037321, ENSMUSG00000023992, ENSMUSG00000073489, ENSMUSG00000006205	199	256	19596	3.46192	1	0.0616354	0.0563245
GOTERM_BP_FAT	GO:0002696~positive regulation of leukocyte activation	14	6.69856	0.00460014	ENSMUSG00000031451, ENSMUSG00000023992, ENSMUSG00000060586, ENSMUSG00000024610, ENSMUSG00000040152, ENSMUSG00000002602, ENSMUSG00000036594, ENSMUSG00000035042, ENSMUSG00000030748, ENSMUSG00000067212, ENSMUSG00000037440, ENSMUSG00000056529, ENSMUSG00000073421, ENSMUSG00000038894	199	559	19596	2.46621	1	0.0618243	0.0564971
GOTERM_BP_FAT	GO:0060993~kidney morphogenesis	6	2.87081	0.004633	ENSMUSG00000036856, ENSMUSG00000031980, ENSMUSG00000048387, ENSMUSG00000016458, ENSMUSG00000045680, ENSMUSG00000022346	199	107	19596	5.52181	1	0.0620875	0.0567376
GOTERM_BP_FAT	GO:0048699~generation of neurons	31	14.8325	0.00473916	ENSMUSG00000031451, ENSMUSG00000005360, ENSMUSG00000040249, ENSMUSG00000023992, ENSMUSG00000022346, ENSMUSG00000024621, ENSMUSG00000047414, ENSMUSG00000020027, ENSMUSG00000039533, ENSMUSG00000052934, ENSMUSG00000036887, ENSMUSG00000036856, ENSMUSG00000037868, ENSMUSG00000031980, ENSMUSG00000055254, ENSMUSG00000028654, ENSMUSG00000043969, ENSMUSG00000000120, ENSMUSG00000025789, ENSMUSG00000022893,…	199	1810	19596	1.68654	1	0.0633288	0.0578719
GOTERM_BP_FAT	GO:0031401~positive regulation of protein modification process	25	11.9617	0.00479737	ENSMUSG00000031451, ENSMUSG00000054675, ENSMUSG00000086962, ENSMUSG00000040249, ENSMUSG00000023992, ENSMUSG00000024621, ENSMUSG00000032726, ENSMUSG00000074345, ENSMUSG00000039533, ENSMUSG00000031980, ENSMUSG00000028871, ENSMUSG00000018849, ENSMUSG00000078853, ENSMUSG00000055254, ENSMUSG00000023046, ENSMUSG00000000120, ENSMUSG00000024610, ENSMUSG00000040152, ENSMUSG00000069874, ENSMUSG00000034271,…	199	1346	19596	1.82898	1	0.0639239	0.0584158
GOTERM_BP_FAT	GO:0061326~renal tubule development	6	2.87081	0.0048189	ENSMUSG00000036856, ENSMUSG00000031980, ENSMUSG00000048387, ENSMUSG00000016458, ENSMUSG00000045680, ENSMUSG00000022346	199	108	19596	5.47069	1	0.0640156	0.0584996
GOTERM_BP_FAT	GO:0055082~cellular chemical homeostasis	19	9.09091	0.00484531	ENSMUSG00000031451, ENSMUSG00000031980, ENSMUSG00000005360, ENSMUSG00000031075, ENSMUSG00000049112, ENSMUSG00000040249, ENSMUSG00000033161, ENSMUSG00000000120, ENSMUSG00000022346, ENSMUSG00000022840, ENSMUSG00000019970, ENSMUSG00000027716, ENSMUSG00000020733, ENSMUSG00000035042, ENSMUSG00000009185, ENSMUSG00000038894, ENSMUSG00000037820, ENSMUSG00000019787, ENSMUSG00000030730	199	905	19596	2.06738	1	0.0640156	0.0584996
GOTERM_BP_FAT	GO:0043410~positive regulation of MAPK cascade	14	6.69856	0.00484373	ENSMUSG00000031451, ENSMUSG00000031980, ENSMUSG00000018849, ENSMUSG00000055254, ENSMUSG00000040249, ENSMUSG00000023992, ENSMUSG00000023046, ENSMUSG00000000120, ENSMUSG00000024621, ENSMUSG00000024610, ENSMUSG00000040152, ENSMUSG00000035042, ENSMUSG00000009185, ENSMUSG00000074345	199	562	19596	2.45305	1	0.0640156	0.0584996
GOTERM_BP_FAT	GO:0070661~leukocyte proliferation	11	5.26316	0.0048853	ENSMUSG00000036856, ENSMUSG00000036594, ENSMUSG00000035042, ENSMUSG00000067212, ENSMUSG00000073421, ENSMUSG00000023992, ENSMUSG00000038894, ENSMUSG00000034652, ENSMUSG00000041202, ENSMUSG00000024621, ENSMUSG00000024610	199	374	19596	2.89625	1	0.0643059	0.0587649
GOTERM_BP_FAT	GO:0055002~striated muscle cell development	8	3.82775	0.00490854	ENSMUSG00000021798, ENSMUSG00000049382, ENSMUSG00000068699, ENSMUSG00000031980, ENSMUSG00000020911, ENSMUSG00000057003, ENSMUSG00000020186, ENSMUSG00000031972	199	205	19596	3.84282	1	0.0643059	0.0587649
GOTERM_BP_FAT	GO:0050777~negative regulation of immune response	8	3.82775	0.00490854	ENSMUSG00000032661, ENSMUSG00000030748, ENSMUSG00000067212, ENSMUSG00000035692, ENSMUSG00000037321, ENSMUSG00000023992, ENSMUSG00000073489, ENSMUSG00000034652	199	205	19596	3.84282	1	0.0643059	0.0587649
GOTERM_BP_FAT	GO:2001233~regulation of apoptotic signaling pathway	12	5.74163	0.00493858	ENSMUSG00000040152, ENSMUSG00000036856, ENSMUSG00000031980, ENSMUSG00000020733, ENSMUSG00000037440, ENSMUSG00000017737, ENSMUSG00000023992, ENSMUSG00000027322, ENSMUSG00000000120, ENSMUSG00000032359, ENSMUSG00000022346, ENSMUSG00000024610	199	436	19596	2.71025	1	0.0643682	0.0588218
GOTERM_BP_FAT	GO:0006820~anion transport	15	7.17703	0.00494081	ENSMUSG00000031980, ENSMUSG00000055489, ENSMUSG00000005360, ENSMUSG00000031075, ENSMUSG00000055254, ENSMUSG00000048387, ENSMUSG00000041202, ENSMUSG00000022346, ENSMUSG00000040152, ENSMUSG00000020733, ENSMUSG00000056529, ENSMUSG00000074345, ENSMUSG00000032725, ENSMUSG00000038894, ENSMUSG00000034320	199	630	19596	2.34458	1	0.0643682	0.0588218
GOTERM_BP_FAT	GO:0034764~positive regulation of transmembrane transport	8	3.82775	0.00504495	ENSMUSG00000031980, ENSMUSG00000020733, ENSMUSG00000020704, ENSMUSG00000056529, ENSMUSG00000023992, ENSMUSG00000038642, ENSMUSG00000019787, ENSMUSG00000030730	199	206	19596	3.82417	1	0.0655423	0.0598947
GOTERM_BP_FAT	GO:1904738~vascular associated smooth muscle cell migration	4	1.91388	0.00524201	ENSMUSG00000031980, ENSMUSG00000024713, ENSMUSG00000040249, ENSMUSG00000022893	199	35	19596	11.254	1	0.0670524	0.0612747
GOTERM_BP_FAT	GO:1901342~regulation of vasculature development	11	5.26316	0.00523233	ENSMUSG00000040152, ENSMUSG00000036856, ENSMUSG00000015340, ENSMUSG00000031980, ENSMUSG00000017969, ENSMUSG00000035042, ENSMUSG00000016458, ENSMUSG00000017737, ENSMUSG00000022893, ENSMUSG00000000120, ENSMUSG00000032359	199	378	19596	2.8656	1	0.0670524	0.0612747
GOTERM_BP_FAT	GO:0072203~cell proliferation involved in metanephros development	3	1.43541	0.00526154	ENSMUSG00000048387, ENSMUSG00000016458, ENSMUSG00000022346	199	11	19596	26.8561	1	0.0670524	0.0612747
GOTERM_BP_FAT	GO:0043491~protein kinase B signaling	8	3.82775	0.00517684	ENSMUSG00000040152, ENSMUSG00000031451, ENSMUSG00000020733, ENSMUSG00000002602, ENSMUSG00000035042, ENSMUSG00000055980, ENSMUSG00000074345, ENSMUSG00000000120	199	207	19596	3.8057	1	0.0670524	0.0612747
GOTERM_BP_FAT	GO:0031589~cell-substrate adhesion	11	5.26316	0.00523233	ENSMUSG00000040152, ENSMUSG00000036856, ENSMUSG00000029860, ENSMUSG00000021215, ENSMUSG00000031451, ENSMUSG00000031980, ENSMUSG00000024713, ENSMUSG00000002602, ENSMUSG00000047793, ENSMUSG00000058297, ENSMUSG00000040249	199	378	19596	2.8656	1	0.0670524	0.0612747
GOTERM_BP_FAT	GO:0002503~peptide antigen assembly with MHC class II protein complex	3	1.43541	0.00526154	ENSMUSG00000036594, ENSMUSG00000073421, ENSMUSG00000060586	199	11	19596	26.8561	1	0.0670524	0.0612747
GOTERM_BP_FAT	GO:0002399~MHC class II protein complex assembly	3	1.43541	0.00526154	ENSMUSG00000036594, ENSMUSG00000073421, ENSMUSG00000060586	199	11	19596	26.8561	1	0.0670524	0.0612747
GOTERM_BP_FAT	GO:0050807~regulation of synapse organization	8	3.82775	0.0053093	ENSMUSG00000047414, ENSMUSG00000047787, ENSMUSG00000032089, ENSMUSG00000055254, ENSMUSG00000020704, ENSMUSG00000049112, ENSMUSG00000023992, ENSMUSG00000025789	199	208	19596	3.7874	1	0.0674772	0.0616629
GOTERM_BP_FAT	GO:0022407~regulation of cell-cell adhesion	13	6.2201	0.00533132	ENSMUSG00000036856, ENSMUSG00000060586, ENSMUSG00000041202, ENSMUSG00000024610, ENSMUSG00000036594, ENSMUSG00000035042, ENSMUSG00000030748, ENSMUSG00000067212, ENSMUSG00000037440, ENSMUSG00000056529, ENSMUSG00000073421, ENSMUSG00000034652, ENSMUSG00000039910	199	505	19596	2.53493	1	0.0675734	0.0617508
GOTERM_BP_FAT	GO:1903530~regulation of secretion by cell	16	7.6555	0.00551138	ENSMUSG00000031980, ENSMUSG00000031075, ENSMUSG00000052397, ENSMUSG00000055254, ENSMUSG00000055980, ENSMUSG00000049112, ENSMUSG00000040249, ENSMUSG00000023992, ENSMUSG00000025885, ENSMUSG00000022840, ENSMUSG00000035042, ENSMUSG00000030748, ENSMUSG00000056529, ENSMUSG00000032726, ENSMUSG00000038894, ENSMUSG00000034652	199	706	19596	2.23167	1	0.0696668	0.0636639
GOTERM_BP_FAT	GO:0034765~regulation of ion transmembrane transport	13	6.2201	0.00557452	ENSMUSG00000031980, ENSMUSG00000048387, ENSMUSG00000023992, ENSMUSG00000040152, ENSMUSG00000015340, ENSMUSG00000020733, ENSMUSG00000020704, ENSMUSG00000056529, ENSMUSG00000038894, ENSMUSG00000017737, ENSMUSG00000038642, ENSMUSG00000019787, ENSMUSG00000030730	199	507	19596	2.52493	1	0.070202	0.0641529
GOTERM_BP_FAT	GO:0030100~regulation of endocytosis	10	4.78469	0.00559875	ENSMUSG00000020961, ENSMUSG00000031451, ENSMUSG00000028871, ENSMUSG00000002602, ENSMUSG00000040249, ENSMUSG00000023992, ENSMUSG00000030854, ENSMUSG00000057729, ENSMUSG00000034652, ENSMUSG00000037820	199	322	19596	3.05815	1	0.070202	0.0641529
GOTERM_BP_FAT	GO:0009410~response to xenobiotic stimulus	10	4.78469	0.00559875	ENSMUSG00000031451, ENSMUSG00000025934, ENSMUSG00000005360, ENSMUSG00000026077, ENSMUSG00000020704, ENSMUSG00000021250, ENSMUSG00000033161, ENSMUSG00000017737, ENSMUSG00000043969, ENSMUSG00000022346	199	322	19596	3.05815	1	0.070202	0.0641529
GOTERM_BP_FAT	GO:0034763~negative regulation of transmembrane transport	6	2.87081	0.00561567	ENSMUSG00000040152, ENSMUSG00000020733, ENSMUSG00000048387, ENSMUSG00000017737, ENSMUSG00000038894, ENSMUSG00000019787	199	112	19596	5.27531	1	0.0702259	0.0641747
GOTERM_BP_FAT	GO:0045672~positive regulation of osteoclast differentiation	4	1.91388	0.00567652	ENSMUSG00000035042, ENSMUSG00000021250, ENSMUSG00000023992, ENSMUSG00000024621	199	36	19596	10.9414	1	0.0707975	0.0646972
GOTERM_BP_FAT	GO:1902532~negative regulation of intracellular signal transduction	14	6.69856	0.00571732	ENSMUSG00000031453, ENSMUSG00000031980, ENSMUSG00000018849, ENSMUSG00000052397, ENSMUSG00000023992, ENSMUSG00000028967, ENSMUSG00000024610, ENSMUSG00000040152, ENSMUSG00000020027, ENSMUSG00000020733, ENSMUSG00000037440, ENSMUSG00000017737, ENSMUSG00000030854, ENSMUSG00000034652	199	574	19596	2.40176	1	0.07091	0.0647999
GOTERM_BP_FAT	GO:0071214~cellular response to abiotic stimulus	11	5.26316	0.00573499	ENSMUSG00000021215, ENSMUSG00000031980, ENSMUSG00000020704, ENSMUSG00000056529, ENSMUSG00000033161, ENSMUSG00000017737, ENSMUSG00000073489, ENSMUSG00000044217, ENSMUSG00000028967, ENSMUSG00000022346, ENSMUSG00000042842	199	383	19596	2.82819	1	0.07091	0.0647999
GOTERM_BP_FAT	GO:0060326~cell chemotaxis	10	4.78469	0.00574618	ENSMUSG00000040152, ENSMUSG00000041120, ENSMUSG00000031451, ENSMUSG00000035042, ENSMUSG00000009185, ENSMUSG00000002897, ENSMUSG00000040026, ENSMUSG00000024621, ENSMUSG00000024610, ENSMUSG00000018920	199	324	19596	3.03927	1	0.07091	0.0647999
GOTERM_BP_FAT	GO:0043901~negative regulation of multi-organism process	8	3.82775	0.00574005	ENSMUSG00000044786, ENSMUSG00000032661, ENSMUSG00000035042, ENSMUSG00000009185, ENSMUSG00000035692, ENSMUSG00000073489, ENSMUSG00000006205, ENSMUSG00000024610	199	211	19596	3.73355	1	0.07091	0.0647999
GOTERM_BP_FAT	GO:0045071~negative regulation of viral genome replication	5	2.39234	0.00579833	ENSMUSG00000032661, ENSMUSG00000035042, ENSMUSG00000009185, ENSMUSG00000035692, ENSMUSG00000073489	199	71	19596	6.93467	1	0.0713653	0.065216
GOTERM_BP_FAT	GO:0090596~sensory organ morphogenesis	10	4.78469	0.0059692	ENSMUSG00000020733, ENSMUSG00000057322, ENSMUSG00000055254, ENSMUSG00000048387, ENSMUSG00000027004, ENSMUSG00000074622, ENSMUSG00000044217, ENSMUSG00000039910, ENSMUSG00000022346, ENSMUSG00000035403	199	325	19596	3.02992	1	0.0732755	0.0669616
GOTERM_BP_FAT	GO:0098602~single organism cell adhesion	16	7.6555	0.00601896	ENSMUSG00000052397, ENSMUSG00000060586, ENSMUSG00000041202, ENSMUSG00000024610, ENSMUSG00000040152, ENSMUSG00000021215, ENSMUSG00000002602, ENSMUSG00000036594, ENSMUSG00000035042, ENSMUSG00000030748, ENSMUSG00000067212, ENSMUSG00000037440, ENSMUSG00000056529, ENSMUSG00000073421, ENSMUSG00000034652, ENSMUSG00000039910	199	713	19596	2.20976	1	0.0736627	0.0673154
GOTERM_BP_FAT	GO:0070663~regulation of leukocyte proliferation	9	4.30622	0.00603224	ENSMUSG00000036594, ENSMUSG00000035042, ENSMUSG00000067212, ENSMUSG00000073421, ENSMUSG00000038894, ENSMUSG00000034652, ENSMUSG00000041202, ENSMUSG00000024621, ENSMUSG00000024610	199	268	19596	3.30691	1	0.0736627	0.0673154
GOTERM_BP_FAT	GO:0048146~positive regulation of fibroblast proliferation	5	2.39234	0.0060918	ENSMUSG00000031451, ENSMUSG00000031980, ENSMUSG00000000120, ENSMUSG00000022346, ENSMUSG00000024610	199	72	19596	6.83836	1	0.0740034	0.0676268
GOTERM_BP_FAT	GO:0001960~negative regulation of cytokine-mediated signaling pathway	5	2.39234	0.0060918	ENSMUSG00000031451, ENSMUSG00000032661, ENSMUSG00000035692, ENSMUSG00000023992, ENSMUSG00000056427	199	72	19596	6.83836	1	0.0740034	0.0676268
GOTERM_BP_FAT	GO:0034122~negative regulation of toll-like receptor signaling pathway	4	1.91388	0.006132	ENSMUSG00000023992, ENSMUSG00000034652, ENSMUSG00000025017, ENSMUSG00000021356	199	37	19596	10.6457	1	0.0741069	0.0677214
GOTERM_BP_FAT	GO:0014002~astrocyte development	4	1.91388	0.006132	ENSMUSG00000031980, ENSMUSG00000040249, ENSMUSG00000023992, ENSMUSG00000036887	199	37	19596	10.6457	1	0.0741069	0.0677214
GOTERM_BP_FAT	GO:0098660~inorganic ion transmembrane transport	16	7.6555	0.00624776	ENSMUSG00000031451, ENSMUSG00000055489, ENSMUSG00000005360, ENSMUSG00000031075, ENSMUSG00000048387, ENSMUSG00000033161, ENSMUSG00000023992, ENSMUSG00000023243, ENSMUSG00000027716, ENSMUSG00000050856, ENSMUSG00000020733, ENSMUSG00000020704, ENSMUSG00000056529, ENSMUSG00000034320, ENSMUSG00000019787, ENSMUSG00000030730	199	716	19596	2.2005	1	0.0753113	0.068822
GOTERM_BP_FAT	GO:0002579~positive regulation of antigen processing and presentation	3	1.43541	0.00627205	ENSMUSG00000073421, ENSMUSG00000023992, ENSMUSG00000024610	199	12	19596	24.6181	1	0.0754097	0.0689119
GOTERM_BP_FAT	GO:0060675~ureteric bud morphogenesis	5	2.39234	0.00639497	ENSMUSG00000036856, ENSMUSG00000031980, ENSMUSG00000016458, ENSMUSG00000045680, ENSMUSG00000022346	199	73	19596	6.74468	1	0.0766905	0.0700823
GOTERM_BP_FAT	GO:0043903~regulation of symbiosis, encompassing mutualism through parasitism	10	4.78469	0.00641542	ENSMUSG00000044786, ENSMUSG00000032661, ENSMUSG00000002602, ENSMUSG00000035042, ENSMUSG00000009185, ENSMUSG00000035692, ENSMUSG00000073489, ENSMUSG00000006205, ENSMUSG00000024621, ENSMUSG00000024610	199	329	19596	2.99308	1	0.0767389	0.0701266
GOTERM_BP_FAT	GO:0072073~kidney epithelium development	7	3.34928	0.00651138	ENSMUSG00000036856, ENSMUSG00000031980, ENSMUSG00000025934, ENSMUSG00000048387, ENSMUSG00000016458, ENSMUSG00000045680, ENSMUSG00000022346	199	164	19596	4.20309	1	0.0774904	0.0708134
GOTERM_BP_FAT	GO:0045778~positive regulation of ossification	6	2.87081	0.00650121	ENSMUSG00000036856, ENSMUSG00000054675, ENSMUSG00000035692, ENSMUSG00000048387, ENSMUSG00000073489, ENSMUSG00000071637	199	116	19596	5.0934	1	0.0774904	0.0708134
GOTERM_BP_FAT	GO:0050867~positive regulation of cell activation	14	6.69856	0.00657476	ENSMUSG00000031451, ENSMUSG00000023992, ENSMUSG00000060586, ENSMUSG00000024610, ENSMUSG00000040152, ENSMUSG00000002602, ENSMUSG00000036594, ENSMUSG00000035042, ENSMUSG00000030748, ENSMUSG00000067212, ENSMUSG00000037440, ENSMUSG00000056529, ENSMUSG00000073421, ENSMUSG00000038894	199	584	19596	2.36064	1	0.0780461	0.0713211
GOTERM_BP_FAT	GO:1903037~regulation of leukocyte cell-cell adhesion	11	5.26316	0.00659481	ENSMUSG00000036594, ENSMUSG00000035042, ENSMUSG00000030748, ENSMUSG00000067212, ENSMUSG00000037440, ENSMUSG00000056529, ENSMUSG00000073421, ENSMUSG00000060586, ENSMUSG00000034652, ENSMUSG00000041202, ENSMUSG00000024610	199	391	19596	2.77032	1	0.0780859	0.0713575
GOTERM_BP_FAT	GO:2000107~negative regulation of leukocyte apoptotic process	5	2.39234	0.006708	ENSMUSG00000031451, ENSMUSG00000002602, ENSMUSG00000035042, ENSMUSG00000038894, ENSMUSG00000024610	199	74	19596	6.65354	1	0.0791932	0.0723694
GOTERM_BP_FAT	GO:0030098~lymphocyte differentiation	12	5.74163	0.00672219	ENSMUSG00000036856, ENSMUSG00000031451, ENSMUSG00000002602, ENSMUSG00000051495, ENSMUSG00000036594, ENSMUSG00000030748, ENSMUSG00000037440, ENSMUSG00000073421, ENSMUSG00000074622, ENSMUSG00000041202, ENSMUSG00000024610, ENSMUSG00000021356	199	455	19596	2.59707	1	0.0791932	0.0723694
GOTERM_BP_FAT	GO:0016051~carbohydrate biosynthetic process	8	3.82775	0.00681977	ENSMUSG00000034612, ENSMUSG00000024042, ENSMUSG00000055980, ENSMUSG00000056529, ENSMUSG00000033849, ENSMUSG00000038894, ENSMUSG00000039037, ENSMUSG00000019139	199	218	19596	3.61366	1	0.0801408	0.0732354
GOTERM_BP_FAT	GO:0010959~regulation of metal ion transport	12	5.74163	0.00694497	ENSMUSG00000027716, ENSMUSG00000019970, ENSMUSG00000031980, ENSMUSG00000020733, ENSMUSG00000024042, ENSMUSG00000027574, ENSMUSG00000035042, ENSMUSG00000048387, ENSMUSG00000033161, ENSMUSG00000023992, ENSMUSG00000019787, ENSMUSG00000030730	199	457	19596	2.58571	1	0.0814076	0.074393
GOTERM_BP_FAT	GO:0032760~positive regulation of tumor necrosis factor production	6	2.87081	0.0069788	ENSMUSG00000040152, ENSMUSG00000015340, ENSMUSG00000032661, ENSMUSG00000067212, ENSMUSG00000056529, ENSMUSG00000037379	199	118	19596	5.00707	1	0.0815996	0.0745684
GOTERM_BP_FAT	GO:0034762~regulation of transmembrane transport	13	6.2201	0.00701121	ENSMUSG00000031980, ENSMUSG00000048387, ENSMUSG00000023992, ENSMUSG00000040152, ENSMUSG00000015340, ENSMUSG00000020733, ENSMUSG00000020704, ENSMUSG00000056529, ENSMUSG00000038894, ENSMUSG00000017737, ENSMUSG00000038642, ENSMUSG00000019787, ENSMUSG00000030730	199	523	19596	2.44769	1	0.0817741	0.0747279
GOTERM_BP_FAT	GO:0002763~positive regulation of myeloid leukocyte differentiation	5	2.39234	0.00703101	ENSMUSG00000035042, ENSMUSG00000021250, ENSMUSG00000023992, ENSMUSG00000024621, ENSMUSG00000024610	199	75	19596	6.56482	1	0.0818011	0.0747526
GOTERM_BP_FAT	GO:0051701~interaction with host	7	3.34928	0.0070847	ENSMUSG00000031451, ENSMUSG00000002602, ENSMUSG00000009185, ENSMUSG00000017737, ENSMUSG00000027322, ENSMUSG00000022346, ENSMUSG00000024610	199	167	19596	4.12758	1	0.0822212	0.0751365
GOTERM_BP_FAT	GO:0030522~intracellular receptor signaling pathway	8	3.82775	0.00712555	ENSMUSG00000069874, ENSMUSG00000032661, ENSMUSG00000031870, ENSMUSG00000078853, ENSMUSG00000017969, ENSMUSG00000055254, ENSMUSG00000045680, ENSMUSG00000039910	199	220	19596	3.58081	1	0.0824906	0.0753827
GOTERM_BP_FAT	GO:0022008~neurogenesis	32	15.311	0.00717162	ENSMUSG00000031451, ENSMUSG00000005360, ENSMUSG00000040249, ENSMUSG00000023992, ENSMUSG00000022346, ENSMUSG00000024621, ENSMUSG00000047414, ENSMUSG00000020027, ENSMUSG00000039533, ENSMUSG00000052934, ENSMUSG00000036887, ENSMUSG00000036856, ENSMUSG00000037868, ENSMUSG00000031980, ENSMUSG00000055254, ENSMUSG00000028654, ENSMUSG00000043969, ENSMUSG00000000120, ENSMUSG00000025789, ENSMUSG00000022893,…	199	1945	19596	1.62011	1	0.0828189	0.0756827
GOTERM_BP_FAT	GO:0060284~regulation of cell development	22	10.5263	0.00724022	ENSMUSG00000037868, ENSMUSG00000031980, ENSMUSG00000057003, ENSMUSG00000055254, ENSMUSG00000040249, ENSMUSG00000023992, ENSMUSG00000028654, ENSMUSG00000027004, ENSMUSG00000000120, ENSMUSG00000022893, ENSMUSG00000022346, ENSMUSG00000025885, ENSMUSG00000041120, ENSMUSG00000047414, ENSMUSG00000020027, ENSMUSG00000021215, ENSMUSG00000019970, ENSMUSG00000035042, ENSMUSG00000030854, ENSMUSG00000039533,…	199	1164	19596	1.86116	1	0.0832003	0.0760312
GOTERM_BP_FAT	GO:0051963~regulation of synapse assembly	6	2.87081	0.00722656	ENSMUSG00000047414, ENSMUSG00000047787, ENSMUSG00000055254, ENSMUSG00000020704, ENSMUSG00000049112, ENSMUSG00000025789	199	119	19596	4.96499	1	0.0832003	0.0760312
GOTERM_BP_FAT	GO:0032675~regulation of interleukin-6 production	7	3.34928	0.00729066	ENSMUSG00000006014, ENSMUSG00000031451, ENSMUSG00000056529, ENSMUSG00000037379, ENSMUSG00000023992, ENSMUSG00000002897, ENSMUSG00000024610	199	168	19596	4.10302	1	0.0833702	0.0761865
GOTERM_BP_FAT	GO:0030856~regulation of epithelial cell differentiation	7	3.34928	0.00729066	ENSMUSG00000044786, ENSMUSG00000048387, ENSMUSG00000017737, ENSMUSG00000028654, ENSMUSG00000090698, ENSMUSG00000027004, ENSMUSG00000028967	199	168	19596	4.10302	1	0.0833702	0.0761865
GOTERM_BP_FAT	GO:1903960~negative regulation of anion transmembrane transport	3	1.43541	0.00736339	ENSMUSG00000040152, ENSMUSG00000048387, ENSMUSG00000038894	199	13	19596	22.7244	1	0.0833949	0.0762091
GOTERM_BP_FAT	GO:0060761~negative regulation of response to cytokine stimulus	5	2.39234	0.00736414	ENSMUSG00000031451, ENSMUSG00000032661, ENSMUSG00000035692, ENSMUSG00000023992, ENSMUSG00000056427	199	76	19596	6.47844	1	0.0833949	0.0762091
GOTERM_BP_FAT	GO:0007422~peripheral nervous system development	5	2.39234	0.00736414	ENSMUSG00000037868, ENSMUSG00000031980, ENSMUSG00000089774, ENSMUSG00000055254, ENSMUSG00000039910	199	76	19596	6.47844	1	0.0833949	0.0762091
GOTERM_BP_FAT	GO:0001542~ovulation from ovarian follicle	3	1.43541	0.00736339	ENSMUSG00000031980, ENSMUSG00000031870, ENSMUSG00000022893	199	13	19596	22.7244	1	0.0833949	0.0762091
GOTERM_BP_FAT	GO:1903900~regulation of viral life cycle	8	3.82775	0.00749836	ENSMUSG00000044786, ENSMUSG00000032661, ENSMUSG00000002602, ENSMUSG00000035042, ENSMUSG00000009185, ENSMUSG00000035692, ENSMUSG00000073489, ENSMUSG00000024610	199	222	19596	3.54855	1	0.0845056	0.077224
GOTERM_BP_FAT	GO:1903557~positive regulation of tumor necrosis factor superfamily cytokine production	6	2.87081	0.0074804	ENSMUSG00000040152, ENSMUSG00000015340, ENSMUSG00000032661, ENSMUSG00000067212, ENSMUSG00000056529, ENSMUSG00000037379	199	120	19596	4.92362	1	0.0845056	0.077224
GOTERM_BP_FAT	GO:1901214~regulation of neuron death	11	5.26316	0.00756003	ENSMUSG00000031980, ENSMUSG00000002602, ENSMUSG00000035042, ENSMUSG00000055254, ENSMUSG00000021250, ENSMUSG00000040249, ENSMUSG00000023992, ENSMUSG00000030854, ENSMUSG00000025789, ENSMUSG00000000120, ENSMUSG00000036887	199	399	19596	2.71478	1	0.0849958	0.077672
GOTERM_BP_FAT	GO:0007530~sex determination	4	1.91388	0.00762675	ENSMUSG00000036856, ENSMUSG00000016458, ENSMUSG00000045680, ENSMUSG00000039910	199	40	19596	9.84724	1	0.0855404	0.0781697
GOTERM_BP_FAT	GO:0098661~inorganic anion transmembrane transport	5	2.39234	0.00770751	ENSMUSG00000055489, ENSMUSG00000005360, ENSMUSG00000031075, ENSMUSG00000056529, ENSMUSG00000034320	199	77	19596	6.39431	1	0.0855834	0.078209
GOTERM_BP_FAT	GO:0061138~morphogenesis of a branching epithelium	8	3.82775	0.00768421	ENSMUSG00000036856, ENSMUSG00000031980, ENSMUSG00000031870, ENSMUSG00000016458, ENSMUSG00000045680, ENSMUSG00000037820, ENSMUSG00000032359, ENSMUSG00000022346	199	223	19596	3.53264	1	0.0855834	0.078209
GOTERM_BP_FAT	GO:0050803~regulation of synapse structure or activity	8	3.82775	0.00768421	ENSMUSG00000047414, ENSMUSG00000047787, ENSMUSG00000032089, ENSMUSG00000055254, ENSMUSG00000020704, ENSMUSG00000049112, ENSMUSG00000023992, ENSMUSG00000025789	199	223	19596	3.53264	1	0.0855834	0.078209
GOTERM_BP_FAT	GO:0044259~multicellular organismal macromolecule metabolic process	6	2.87081	0.00774039	ENSMUSG00000036856, ENSMUSG00000017737, ENSMUSG00000057729, ENSMUSG00000038642, ENSMUSG00000006931, ENSMUSG00000028967	199	121	19596	4.88293	1	0.0855834	0.078209
GOTERM_BP_FAT	GO:0032963~collagen metabolic process	6	2.87081	0.00774039	ENSMUSG00000036856, ENSMUSG00000017737, ENSMUSG00000057729, ENSMUSG00000038642, ENSMUSG00000006931, ENSMUSG00000028967	199	121	19596	4.88293	1	0.0855834	0.078209
GOTERM_BP_FAT	GO:0032652~regulation of interleukin-1 production	6	2.87081	0.00774039	ENSMUSG00000031451, ENSMUSG00000023992, ENSMUSG00000073489, ENSMUSG00000054203, ENSMUSG00000026536, ENSMUSG00000028967	199	121	19596	4.88293	1	0.0855834	0.078209
GOTERM_BP_FAT	GO:0032412~regulation of ion transmembrane transporter activity	9	4.30622	0.00791572	ENSMUSG00000020733, ENSMUSG00000020704, ENSMUSG00000056529, ENSMUSG00000048387, ENSMUSG00000017737, ENSMUSG00000023992, ENSMUSG00000038642, ENSMUSG00000019787, ENSMUSG00000030730	199	281	19596	3.15392	1	0.0873156	0.0797919
GOTERM_BP_FAT	GO:0060538~skeletal muscle organ development	8	3.82775	0.00794958	ENSMUSG00000037868, ENSMUSG00000057003, ENSMUSG00000021250, ENSMUSG00000016458, ENSMUSG00000045680, ENSMUSG00000031972, ENSMUSG00000039910, ENSMUSG00000022346	199	225	19596	3.50124	1	0.0874828	0.0799447
GOTERM_BP_FAT	GO:0010876~lipid localization	12	5.74163	0.00807191	ENSMUSG00000040152, ENSMUSG00000068246, ENSMUSG00000057346, ENSMUSG00000031980, ENSMUSG00000020733, ENSMUSG00000056870, ENSMUSG00000074345, ENSMUSG00000040249, ENSMUSG00000023992, ENSMUSG00000038894, ENSMUSG00000090698, ENSMUSG00000041202	199	466	19596	2.53577	1	0.0884129	0.0807947
GOTERM_BP_FAT	GO:0008543~fibroblast growth factor receptor signaling pathway	5	2.39234	0.00806125	ENSMUSG00000040152, ENSMUSG00000047414, ENSMUSG00000036856, ENSMUSG00000047787, ENSMUSG00000000120	199	78	19596	6.31233	1	0.0884129	0.0807947
GOTERM_BP_FAT	GO:0051250~negative regulation of lymphocyte activation	7	3.34928	0.00814339	ENSMUSG00000002602, ENSMUSG00000036594, ENSMUSG00000030748, ENSMUSG00000073421, ENSMUSG00000034652, ENSMUSG00000041202, ENSMUSG00000024610	199	172	19596	4.0076	1	0.0889875	0.0813198
GOTERM_BP_FAT	GO:0055001~muscle cell development	8	3.82775	0.00827394	ENSMUSG00000021798, ENSMUSG00000049382, ENSMUSG00000068699, ENSMUSG00000031980, ENSMUSG00000020911, ENSMUSG00000057003, ENSMUSG00000020186, ENSMUSG00000031972	199	226	19596	3.48575	1	0.0900498	0.0822905
GOTERM_BP_FAT	GO:0031644~regulation of neurological system process	6	2.87081	0.00827911	ENSMUSG00000037868, ENSMUSG00000031980, ENSMUSG00000036098, ENSMUSG00000056529, ENSMUSG00000038642, ENSMUSG00000000120	199	123	19596	4.80353	1	0.0900498	0.0822905
GOTERM_BP_FAT	GO:0050870~positive regulation of T cell activation	8	3.82775	0.0084251	ENSMUSG00000036594, ENSMUSG00000035042, ENSMUSG00000030748, ENSMUSG00000067212, ENSMUSG00000037440, ENSMUSG00000073421, ENSMUSG00000060586, ENSMUSG00000024610	199	227	19596	3.47039	1	0.0910069	0.0831652
GOTERM_BP_FAT	GO:0050866~negative regulation of cell activation	8	3.82775	0.0084251	ENSMUSG00000002602, ENSMUSG00000036594, ENSMUSG00000030748, ENSMUSG00000073421, ENSMUSG00000023992, ENSMUSG00000034652, ENSMUSG00000041202, ENSMUSG00000024610	199	227	19596	3.47039	1	0.0910069	0.0831652
GOTERM_BP_FAT	GO:0014068~positive regulation of phosphatidylinositol 3-kinase signaling	5	2.39234	0.00842549	ENSMUSG00000031980, ENSMUSG00000035042, ENSMUSG00000055254, ENSMUSG00000023992, ENSMUSG00000025017	199	79	19596	6.23243	1	0.0910069	0.0831652
GOTERM_BP_FAT	GO:0060429~epithelium development	24	11.4833	0.00855174	ENSMUSG00000036856, ENSMUSG00000031870, ENSMUSG00000031980, ENSMUSG00000052397, ENSMUSG00000048387, ENSMUSG00000028654, ENSMUSG00000027004, ENSMUSG00000000120, ENSMUSG00000028967, ENSMUSG00000022346, ENSMUSG00000044786, ENSMUSG00000025934, ENSMUSG00000038393, ENSMUSG00000020733, ENSMUSG00000020911, ENSMUSG00000016458, ENSMUSG00000045680, ENSMUSG00000017737, ENSMUSG00000090698, ENSMUSG00000074622,…	199	1335	19596	1.77029	1	0.0918021	0.0838919
GOTERM_BP_FAT	GO:0050764~regulation of phagocytosis	6	2.87081	0.00855799	ENSMUSG00000031451, ENSMUSG00000040249, ENSMUSG00000023992, ENSMUSG00000057729, ENSMUSG00000034652, ENSMUSG00000037820	199	124	19596	4.76479	1	0.0918021	0.0838919
GOTERM_BP_FAT	GO:0007567~parturition	3	1.43541	0.00853384	ENSMUSG00000034009, ENSMUSG00000049112, ENSMUSG00000056529	199	14	19596	21.1012	1	0.0918021	0.0838919
GOTERM_BP_FAT	GO:0072210~metanephric nephron development	4	1.91388	0.00873241	ENSMUSG00000036856, ENSMUSG00000048387, ENSMUSG00000016458, ENSMUSG00000045680	199	42	19596	9.37832	1	0.0932454	0.0852107
GOTERM_BP_FAT	GO:0007399~nervous system development	40	19.1388	0.00872069	ENSMUSG00000031451, ENSMUSG00000005360, ENSMUSG00000021250, ENSMUSG00000040249, ENSMUSG00000023992, ENSMUSG00000022346, ENSMUSG00000024621, ENSMUSG00000047414, ENSMUSG00000020027, ENSMUSG00000089774, ENSMUSG00000020704, ENSMUSG00000033715, ENSMUSG00000074622, ENSMUSG00000039533, ENSMUSG00000052934, ENSMUSG00000039910, ENSMUSG00000036887, ENSMUSG00000036856, ENSMUSG00000037868, ENSMUSG00000031980,…	199	2636	19596	1.49427	1	0.0932454	0.0852107
GOTERM_BP_FAT	GO:0070228~regulation of lymphocyte apoptotic process	5	2.39234	0.00880034	ENSMUSG00000035042, ENSMUSG00000038894, ENSMUSG00000027322, ENSMUSG00000022346, ENSMUSG00000024610	199	80	19596	6.15452	1	0.0937566	0.085678
GOTERM_BP_FAT	GO:0032496~response to lipopolysaccharide	12	5.74163	0.00886769	ENSMUSG00000069874, ENSMUSG00000044786, ENSMUSG00000032089, ENSMUSG00000078853, ENSMUSG00000002602, ENSMUSG00000035042, ENSMUSG00000056529, ENSMUSG00000021250, ENSMUSG00000037379, ENSMUSG00000023992, ENSMUSG00000105096, ENSMUSG00000018920	199	473	19596	2.49824	1	0.0938533	0.0857663
GOTERM_BP_FAT	GO:0019079~viral genome replication	6	2.87081	0.00884331	ENSMUSG00000031451, ENSMUSG00000032661, ENSMUSG00000035042, ENSMUSG00000009185, ENSMUSG00000035692, ENSMUSG00000073489	199	125	19596	4.72667	1	0.0938533	0.0857663
GOTERM_BP_FAT	GO:0002449~lymphocyte mediated immunity	13	6.2201	0.00886961	ENSMUSG00000036905, ENSMUSG00000023992, ENSMUSG00000060586, ENSMUSG00000024610, ENSMUSG00000073418, ENSMUSG00000036594, ENSMUSG00000030748, ENSMUSG00000067212, ENSMUSG00000037321, ENSMUSG00000073421, ENSMUSG00000036896, ENSMUSG00000032359, ENSMUSG00000036887	199	539	19596	2.37503	1	0.0938533	0.0857663
GOTERM_BP_FAT	GO:0048562~embryonic organ morphogenesis	10	4.78469	0.0089618	ENSMUSG00000034612, ENSMUSG00000020733, ENSMUSG00000057322, ENSMUSG00000048387, ENSMUSG00000045680, ENSMUSG00000027004, ENSMUSG00000074622, ENSMUSG00000039910, ENSMUSG00000022346, ENSMUSG00000035403	199	347	19596	2.83782	1	0.0946148	0.0864622
GOTERM_BP_FAT	GO:0032612~interleukin-1 production	6	2.87081	0.00913514	ENSMUSG00000031451, ENSMUSG00000023992, ENSMUSG00000073489, ENSMUSG00000054203, ENSMUSG00000026536, ENSMUSG00000028967	199	126	19596	4.68916	1	0.0962276	0.087936
GOTERM_BP_FAT	GO:0044057~regulation of system process	14	6.69856	0.00940868	ENSMUSG00000037868, ENSMUSG00000031451, ENSMUSG00000031980, ENSMUSG00000049112, ENSMUSG00000033161, ENSMUSG00000000120, ENSMUSG00000028967, ENSMUSG00000027716, ENSMUSG00000020733, ENSMUSG00000036098, ENSMUSG00000020704, ENSMUSG00000056529, ENSMUSG00000038642, ENSMUSG00000030730	199	611	19596	2.25632	1	0.0988863	0.0903656
GOTERM_BP_FAT	GO:0072009~nephron epithelium development	6	2.87081	0.00943355	ENSMUSG00000036856, ENSMUSG00000031980, ENSMUSG00000048387, ENSMUSG00000016458, ENSMUSG00000045680, ENSMUSG00000022346	199	127	19596	4.65224	1	0.0989253	0.0904013
GOTERM_BP_FAT	GO:2000343~positive regulation of chemokine (C-X-C motif) ligand 2 production	3	1.43541	0.00978171	ENSMUSG00000035042, ENSMUSG00000040249, ENSMUSG00000024610	199	15	19596	19.6945	1	0.101439	0.0926985
GOTERM_BP_FAT	GO:2000018~regulation of male gonad development	3	1.43541	0.00978171	ENSMUSG00000036856, ENSMUSG00000016458, ENSMUSG00000039910	199	15	19596	19.6945	1	0.101439	0.0926985
GOTERM_BP_FAT	GO:0045621~positive regulation of lymphocyte differentiation	6	2.87081	0.00973861	ENSMUSG00000031451, ENSMUSG00000002602, ENSMUSG00000036594, ENSMUSG00000030748, ENSMUSG00000037440, ENSMUSG00000024610	199	128	19596	4.61589	1	0.101439	0.0926985
GOTERM_BP_FAT	GO:0002501~peptide antigen assembly with MHC protein complex	3	1.43541	0.00978171	ENSMUSG00000036594, ENSMUSG00000073421, ENSMUSG00000060586	199	15	19596	19.6945	1	0.101439	0.0926985
GOTERM_BP_FAT	GO:0002396~MHC protein complex assembly	3	1.43541	0.00978171	ENSMUSG00000036594, ENSMUSG00000073421, ENSMUSG00000060586	199	15	19596	19.6945	1	0.101439	0.0926985
GOTERM_BP_FAT	GO:0022898~regulation of transmembrane transporter activity	9	4.30622	0.0098838	ENSMUSG00000020733, ENSMUSG00000020704, ENSMUSG00000056529, ENSMUSG00000048387, ENSMUSG00000017737, ENSMUSG00000023992, ENSMUSG00000038642, ENSMUSG00000019787, ENSMUSG00000030730	199	292	19596	3.03511	1	0.102271	0.0934588
GOTERM_BP_FAT	GO:0048568~embryonic organ development	13	6.2201	0.0101641	ENSMUSG00000034612, ENSMUSG00000049382, ENSMUSG00000057322, ENSMUSG00000048387, ENSMUSG00000027004, ENSMUSG00000022346, ENSMUSG00000024713, ENSMUSG00000020733, ENSMUSG00000020911, ENSMUSG00000045680, ENSMUSG00000074622, ENSMUSG00000039910, ENSMUSG00000035403	199	549	19596	2.33177	1	0.104939	0.0958967
GOTERM_BP_FAT	GO:0050863~regulation of T cell activation	10	4.78469	0.0102611	ENSMUSG00000036594, ENSMUSG00000035042, ENSMUSG00000030748, ENSMUSG00000067212, ENSMUSG00000037440, ENSMUSG00000073421, ENSMUSG00000060586, ENSMUSG00000034652, ENSMUSG00000041202, ENSMUSG00000024610	199	355	19596	2.77387	1	0.105708	0.0965993
GOTERM_BP_FAT	GO:0032414~positive regulation of ion transmembrane transporter activity	6	2.87081	0.010369	ENSMUSG00000020704, ENSMUSG00000056529, ENSMUSG00000023992, ENSMUSG00000038642, ENSMUSG00000019787, ENSMUSG00000030730	199	130	19596	4.54488	1	0.10635	0.0971862
GOTERM_BP_FAT	GO:0002688~regulation of leukocyte chemotaxis	6	2.87081	0.010369	ENSMUSG00000040152, ENSMUSG00000041120, ENSMUSG00000031451, ENSMUSG00000035042, ENSMUSG00000024621, ENSMUSG00000024610	199	130	19596	4.54488	1	0.10635	0.0971862
GOTERM_BP_FAT	GO:0070374~positive regulation of ERK1 and ERK2 cascade	8	3.82775	0.0107739	ENSMUSG00000031451, ENSMUSG00000035042, ENSMUSG00000009185, ENSMUSG00000074345, ENSMUSG00000040249, ENSMUSG00000023992, ENSMUSG00000024621, ENSMUSG00000024610	199	238	19596	3.31	1	0.110231	0.100733
GOTERM_BP_FAT	GO:0045670~regulation of osteoclast differentiation	5	2.39234	0.0108379	ENSMUSG00000035042, ENSMUSG00000021250, ENSMUSG00000023992, ENSMUSG00000074622, ENSMUSG00000024621	199	85	19596	5.79249	1	0.110231	0.100733
GOTERM_BP_FAT	GO:0035295~tube development	16	7.6555	0.0108417	ENSMUSG00000036856, ENSMUSG00000034009, ENSMUSG00000031870, ENSMUSG00000031980, ENSMUSG00000049112, ENSMUSG00000048387, ENSMUSG00000043969, ENSMUSG00000028967, ENSMUSG00000022346, ENSMUSG00000025934, ENSMUSG00000024713, ENSMUSG00000016458, ENSMUSG00000045680, ENSMUSG00000032359, ENSMUSG00000037820, ENSMUSG00000039910	199	763	19596	2.06495	1	0.110231	0.100733
GOTERM_BP_FAT	GO:0002437~inflammatory response to antigenic stimulus	5	2.39234	0.0108379	ENSMUSG00000048087, ENSMUSG00000067212, ENSMUSG00000023992, ENSMUSG00000027597, ENSMUSG00000041202	199	85	19596	5.79249	1	0.110231	0.100733
GOTERM_BP_FAT	GO:1905521~regulation of macrophage migration	4	1.91388	0.0112125	ENSMUSG00000040152, ENSMUSG00000035042, ENSMUSG00000023992, ENSMUSG00000024621	199	46	19596	8.56281	1	0.111907	0.102265
GOTERM_BP_FAT	GO:1904645~response to beta-amyloid	4	1.91388	0.0112125	ENSMUSG00000040249, ENSMUSG00000017737, ENSMUSG00000023992, ENSMUSG00000000120	199	46	19596	8.56281	1	0.111907	0.102265
GOTERM_BP_FAT	GO:0090184~positive regulation of kidney development	4	1.91388	0.0112125	ENSMUSG00000036856, ENSMUSG00000031980, ENSMUSG00000016458, ENSMUSG00000022346	199	46	19596	8.56281	1	0.111907	0.102265
GOTERM_BP_FAT	GO:0071216~cellular response to biotic stimulus	10	4.78469	0.0111541	ENSMUSG00000069874, ENSMUSG00000044786, ENSMUSG00000038393, ENSMUSG00000078853, ENSMUSG00000002602, ENSMUSG00000035042, ENSMUSG00000037379, ENSMUSG00000023992, ENSMUSG00000105096, ENSMUSG00000018920	199	360	19596	2.73534	1	0.111907	0.102265
GOTERM_BP_FAT	GO:0051093~negative regulation of developmental process	22	10.5263	0.0112458	ENSMUSG00000036856, ENSMUSG00000031451, ENSMUSG00000054675, ENSMUSG00000031980, ENSMUSG00000018849, ENSMUSG00000048387, ENSMUSG00000040249, ENSMUSG00000027004, ENSMUSG00000000120, ENSMUSG00000022893, ENSMUSG00000022346, ENSMUSG00000024610, ENSMUSG00000040152, ENSMUSG00000044786, ENSMUSG00000020027, ENSMUSG00000034271, ENSMUSG00000030748, ENSMUSG00000016458, ENSMUSG00000017737, ENSMUSG00000074622,…	199	1213	19596	1.78598	1	0.111907	0.102265
GOTERM_BP_FAT	GO:0048839~inner ear development	8	3.82775	0.011228	ENSMUSG00000020733, ENSMUSG00000036905, ENSMUSG00000067212, ENSMUSG00000028654, ENSMUSG00000027004, ENSMUSG00000074622, ENSMUSG00000073489, ENSMUSG00000071637	199	240	19596	3.28241	1	0.111907	0.102265
GOTERM_BP_FAT	GO:0032736~positive regulation of interleukin-13 production	3	1.43541	0.0111053	ENSMUSG00000067212, ENSMUSG00000002897, ENSMUSG00000021356	199	16	19596	18.4636	1	0.111907	0.102265
GOTERM_BP_FAT	GO:0030501~positive regulation of bone mineralization	4	1.91388	0.0112125	ENSMUSG00000036856, ENSMUSG00000054675, ENSMUSG00000035692, ENSMUSG00000048387	199	46	19596	8.56281	1	0.111907	0.102265
GOTERM_BP_FAT	GO:0016337~single organismal cell-cell adhesion	14	6.69856	0.011215	ENSMUSG00000052397, ENSMUSG00000060586, ENSMUSG00000041202, ENSMUSG00000024610, ENSMUSG00000040152, ENSMUSG00000036594, ENSMUSG00000035042, ENSMUSG00000030748, ENSMUSG00000067212, ENSMUSG00000037440, ENSMUSG00000056529, ENSMUSG00000073421, ENSMUSG00000034652, ENSMUSG00000039910	199	625	19596	2.20578	1	0.111907	0.102265
GOTERM_BP_FAT	GO:0007507~heart development	15	7.17703	0.0110933	ENSMUSG00000031980, ENSMUSG00000006221, ENSMUSG00000024042, ENSMUSG00000049112, ENSMUSG00000048387, ENSMUSG00000040249, ENSMUSG00000022893, ENSMUSG00000040152, ENSMUSG00000047414, ENSMUSG00000021798, ENSMUSG00000024713, ENSMUSG00000016458, ENSMUSG00000017737, ENSMUSG00000039910, ENSMUSG00000056427	199	694	19596	2.12837	1	0.111907	0.102265
GOTERM_BP_FAT	GO:0030001~metal ion transport	18	8.61244	0.011276	ENSMUSG00000031451, ENSMUSG00000031980, ENSMUSG00000005360, ENSMUSG00000024042, ENSMUSG00000027574, ENSMUSG00000048387, ENSMUSG00000033161, ENSMUSG00000023992, ENSMUSG00000023243, ENSMUSG00000019970, ENSMUSG00000027716, ENSMUSG00000020733, ENSMUSG00000089774, ENSMUSG00000035042, ENSMUSG00000009185, ENSMUSG00000020704, ENSMUSG00000019787, ENSMUSG00000030730	199	912	19596	1.94353	1	0.11196	0.102312
GOTERM_BP_FAT	GO:0002237~response to molecule of bacterial origin	12	5.74163	0.0112989	ENSMUSG00000069874, ENSMUSG00000044786, ENSMUSG00000032089, ENSMUSG00000078853, ENSMUSG00000002602, ENSMUSG00000035042, ENSMUSG00000056529, ENSMUSG00000021250, ENSMUSG00000037379, ENSMUSG00000023992, ENSMUSG00000105096, ENSMUSG00000018920	199	491	19596	2.40666	1	0.11196	0.102312
GOTERM_BP_FAT	GO:0060627~regulation of vesicle-mediated transport	14	6.69856	0.0113536	ENSMUSG00000031451, ENSMUSG00000028871, ENSMUSG00000052397, ENSMUSG00000040249, ENSMUSG00000023992, ENSMUSG00000025885, ENSMUSG00000020961, ENSMUSG00000002602, ENSMUSG00000030748, ENSMUSG00000056529, ENSMUSG00000030854, ENSMUSG00000057729, ENSMUSG00000034652, ENSMUSG00000037820	199	626	19596	2.20226	1	0.112264	0.102591
GOTERM_BP_FAT	GO:0030336~negative regulation of cell migration	9	4.30622	0.0114466	ENSMUSG00000040152, ENSMUSG00000041120, ENSMUSG00000036856, ENSMUSG00000020733, ENSMUSG00000040249, ENSMUSG00000034652, ENSMUSG00000000120, ENSMUSG00000039910, ENSMUSG00000024610	199	300	19596	2.95417	1	0.112945	0.103213
GOTERM_BP_FAT	GO:0071621~granulocyte chemotaxis	6	2.87081	0.0117124	ENSMUSG00000040152, ENSMUSG00000035042, ENSMUSG00000009185, ENSMUSG00000002897, ENSMUSG00000024621, ENSMUSG00000024610	199	134	19596	4.40921	1	0.1146	0.104726
GOTERM_BP_FAT	GO:0034612~response to tumor necrosis factor	8	3.82775	0.0117115	ENSMUSG00000040152, ENSMUSG00000044786, ENSMUSG00000049382, ENSMUSG00000031451, ENSMUSG00000035042, ENSMUSG00000009185, ENSMUSG00000037138, ENSMUSG00000018920	199	242	19596	3.25528	1	0.1146	0.104726
GOTERM_BP_FAT	GO:0032268~regulation of cellular protein metabolic process	42	20.0957	0.0116751	ENSMUSG00000031451, ENSMUSG00000054675, ENSMUSG00000052397, ENSMUSG00000057322, ENSMUSG00000086962, ENSMUSG00000040249, ENSMUSG00000023992, ENSMUSG00000028967, ENSMUSG00000022346, ENSMUSG00000042842, ENSMUSG00000024621, ENSMUSG00000044786, ENSMUSG00000035692, ENSMUSG00000016458, ENSMUSG00000032726, ENSMUSG00000074345, ENSMUSG00000039533, ENSMUSG00000031980, ENSMUSG00000007892, ENSMUSG00000028871,…	199	2856	19596	1.44812	1	0.1146	0.104726
GOTERM_BP_FAT	GO:0010951~negative regulation of endopeptidase activity	7	3.34928	0.0116877	ENSMUSG00000040152, ENSMUSG00000031451, ENSMUSG00000031980, ENSMUSG00000017737, ENSMUSG00000073489, ENSMUSG00000042842, ENSMUSG00000035403	199	186	19596	3.70595	1	0.1146	0.104726
GOTERM_BP_FAT	GO:0006875~cellular metal ion homeostasis	14	6.69856	0.0119217	ENSMUSG00000031980, ENSMUSG00000005360, ENSMUSG00000049112, ENSMUSG00000040249, ENSMUSG00000033161, ENSMUSG00000022346, ENSMUSG00000022840, ENSMUSG00000019970, ENSMUSG00000027716, ENSMUSG00000035042, ENSMUSG00000009185, ENSMUSG00000037820, ENSMUSG00000019787, ENSMUSG00000030730	199	630	19596	2.18827	1	0.116405	0.106375
GOTERM_BP_FAT	GO:0046942~carboxylic acid transport	10	4.78469	0.0120237	ENSMUSG00000040152, ENSMUSG00000031980, ENSMUSG00000020733, ENSMUSG00000005360, ENSMUSG00000055254, ENSMUSG00000048387, ENSMUSG00000032725, ENSMUSG00000038894, ENSMUSG00000041202, ENSMUSG00000022346	199	364	19596	2.70528	1	0.117156	0.107061
GOTERM_BP_FAT	GO:0050868~negative regulation of T cell activation	6	2.87081	0.0120659	ENSMUSG00000036594, ENSMUSG00000030748, ENSMUSG00000073421, ENSMUSG00000034652, ENSMUSG00000041202, ENSMUSG00000024610	199	135	19596	4.37655	1	0.117323	0.107214
GOTERM_BP_FAT	GO:0001818~negative regulation of cytokine production	9	4.30622	0.0121323	ENSMUSG00000040152, ENSMUSG00000044786, ENSMUSG00000006014, ENSMUSG00000031451, ENSMUSG00000032661, ENSMUSG00000002602, ENSMUSG00000052397, ENSMUSG00000023992, ENSMUSG00000028967	199	303	19596	2.92492	1	0.117724	0.10758
GOTERM_BP_FAT	GO:0048754~branching morphogenesis of an epithelial tube	7	3.34928	0.0122707	ENSMUSG00000036856, ENSMUSG00000031980, ENSMUSG00000031870, ENSMUSG00000016458, ENSMUSG00000045680, ENSMUSG00000032359, ENSMUSG00000022346	199	188	19596	3.66652	1	0.11882	0.108582
GOTERM_BP_FAT	GO:0072224~metanephric glomerulus development	3	1.43541	0.0125031	ENSMUSG00000048387, ENSMUSG00000016458, ENSMUSG00000045680	199	17	19596	17.3775	1	0.120812	0.110402
GOTERM_BP_FAT	GO:0015849~organic acid transport	10	4.78469	0.0125281	ENSMUSG00000040152, ENSMUSG00000031980, ENSMUSG00000020733, ENSMUSG00000005360, ENSMUSG00000055254, ENSMUSG00000048387, ENSMUSG00000032725, ENSMUSG00000038894, ENSMUSG00000041202, ENSMUSG00000022346	199	367	19596	2.68317	1	0.120812	0.110402
GOTERM_BP_FAT	GO:0051896~regulation of protein kinase B signaling	7	3.34928	0.0125687	ENSMUSG00000040152, ENSMUSG00000031451, ENSMUSG00000020733, ENSMUSG00000002602, ENSMUSG00000055254, ENSMUSG00000074345, ENSMUSG00000000120	199	189	19596	3.64712	1	0.120905	0.110487
GOTERM_BP_FAT	GO:0045923~positive regulation of fatty acid metabolic process	4	1.91388	0.0125894	ENSMUSG00000031980, ENSMUSG00000055980, ENSMUSG00000038894, ENSMUSG00000024610	199	48	19596	8.20603	1	0.120905	0.110487
GOTERM_BP_FAT	GO:0002791~regulation of peptide secretion	10	4.78469	0.0127365	ENSMUSG00000031075, ENSMUSG00000052397, ENSMUSG00000035042, ENSMUSG00000055980, ENSMUSG00000032726, ENSMUSG00000040249, ENSMUSG00000023992, ENSMUSG00000038894, ENSMUSG00000022840, ENSMUSG00000024610	199	368	19596	2.67588	1	0.122067	0.111549
GOTERM_BP_FAT	GO:0032411~positive regulation of transporter activity	6	2.87081	0.0127945	ENSMUSG00000020704, ENSMUSG00000056529, ENSMUSG00000023992, ENSMUSG00000038642, ENSMUSG00000019787, ENSMUSG00000030730	199	137	19596	4.31266	1	0.122372	0.111828
GOTERM_BP_FAT	GO:0043271~negative regulation of ion transport	7	3.34928	0.0128736	ENSMUSG00000040152, ENSMUSG00000020733, ENSMUSG00000048387, ENSMUSG00000017737, ENSMUSG00000038894, ENSMUSG00000034652, ENSMUSG00000019787	199	190	19596	3.62793	1	0.122627	0.112061
GOTERM_BP_FAT	GO:0042110~T cell activation	13	6.2201	0.0128508	ENSMUSG00000036856, ENSMUSG00000060586, ENSMUSG00000041202, ENSMUSG00000021356, ENSMUSG00000024610, ENSMUSG00000036594, ENSMUSG00000035042, ENSMUSG00000030748, ENSMUSG00000067212, ENSMUSG00000037440, ENSMUSG00000073421, ENSMUSG00000074622, ENSMUSG00000034652	199	567	19596	2.25774	1	0.122627	0.112061
GOTERM_BP_FAT	GO:0019725~cellular homeostasis	19	9.09091	0.0129825	ENSMUSG00000031451, ENSMUSG00000031980, ENSMUSG00000005360, ENSMUSG00000031075, ENSMUSG00000049112, ENSMUSG00000040249, ENSMUSG00000033161, ENSMUSG00000000120, ENSMUSG00000022346, ENSMUSG00000022840, ENSMUSG00000019970, ENSMUSG00000027716, ENSMUSG00000020733, ENSMUSG00000035042, ENSMUSG00000009185, ENSMUSG00000038894, ENSMUSG00000037820, ENSMUSG00000019787, ENSMUSG00000030730	199	1001	19596	1.86911	1	0.123162	0.11255
GOTERM_BP_FAT	GO:0003006~developmental process involved in reproduction	19	9.09091	0.0129825	ENSMUSG00000036856, ENSMUSG00000040829, ENSMUSG00000049382, ENSMUSG00000031870, ENSMUSG00000054675, ENSMUSG00000031980, ENSMUSG00000017969, ENSMUSG00000048387, ENSMUSG00000022893, ENSMUSG00000006205, ENSMUSG00000022346, ENSMUSG00000042842, ENSMUSG00000002602, ENSMUSG00000020911, ENSMUSG00000016458, ENSMUSG00000032726, ENSMUSG00000045680, ENSMUSG00000039910, ENSMUSG00000056427	199	1001	19596	1.86911	1	0.123162	0.11255
GOTERM_BP_FAT	GO:0051047~positive regulation of secretion	11	5.26316	0.0130952	ENSMUSG00000031980, ENSMUSG00000031075, ENSMUSG00000052397, ENSMUSG00000030748, ENSMUSG00000049112, ENSMUSG00000055980, ENSMUSG00000056529, ENSMUSG00000040249, ENSMUSG00000023992, ENSMUSG00000038894, ENSMUSG00000025885	199	434	19596	2.49584	1	0.12398	0.113297
GOTERM_BP_FAT	GO:0050670~regulation of lymphocyte proliferation	8	3.82775	0.013351	ENSMUSG00000036594, ENSMUSG00000035042, ENSMUSG00000067212, ENSMUSG00000073421, ENSMUSG00000038894, ENSMUSG00000034652, ENSMUSG00000041202, ENSMUSG00000024610	199	249	19596	3.16377	1	0.125892	0.115044
GOTERM_BP_FAT	GO:0001763~morphogenesis of a branching structure	8	3.82775	0.013351	ENSMUSG00000036856, ENSMUSG00000031980, ENSMUSG00000031870, ENSMUSG00000016458, ENSMUSG00000045680, ENSMUSG00000037820, ENSMUSG00000032359, ENSMUSG00000022346	199	249	19596	3.16377	1	0.125892	0.115044
GOTERM_BP_FAT	GO:0050767~regulation of neurogenesis	19	9.09091	0.0134745	ENSMUSG00000037868, ENSMUSG00000031980, ENSMUSG00000055254, ENSMUSG00000040249, ENSMUSG00000023992, ENSMUSG00000028654, ENSMUSG00000000120, ENSMUSG00000022893, ENSMUSG00000022346, ENSMUSG00000025885, ENSMUSG00000041120, ENSMUSG00000047414, ENSMUSG00000020027, ENSMUSG00000019970, ENSMUSG00000035042, ENSMUSG00000030854, ENSMUSG00000039533, ENSMUSG00000052934, ENSMUSG00000037820	199	1005	19596	1.86167	1	0.126802	0.115876
GOTERM_BP_FAT	GO:2000243~positive regulation of reproductive process	5	2.39234	0.0136564	ENSMUSG00000036856, ENSMUSG00000049112, ENSMUSG00000056529, ENSMUSG00000016458, ENSMUSG00000039910	199	91	19596	5.41057	1	0.127742	0.116735
GOTERM_BP_FAT	GO:0045824~negative regulation of innate immune response	5	2.39234	0.0136564	ENSMUSG00000032661, ENSMUSG00000067212, ENSMUSG00000035692, ENSMUSG00000037321, ENSMUSG00000073489	199	91	19596	5.41057	1	0.127742	0.116735
GOTERM_BP_FAT	GO:0021675~nerve development	5	2.39234	0.0136564	ENSMUSG00000037868, ENSMUSG00000005360, ENSMUSG00000074622, ENSMUSG00000000120, ENSMUSG00000039910	199	91	19596	5.41057	1	0.127742	0.116735
GOTERM_BP_FAT	GO:0060537~muscle tissue development	12	5.74163	0.0137135	ENSMUSG00000037868, ENSMUSG00000031980, ENSMUSG00000024042, ENSMUSG00000057003, ENSMUSG00000021250, ENSMUSG00000048387, ENSMUSG00000016458, ENSMUSG00000045680, ENSMUSG00000020186, ENSMUSG00000031972, ENSMUSG00000039910, ENSMUSG00000022346	199	505	19596	2.33994	1	0.12802	0.116989
GOTERM_BP_FAT	GO:0002694~regulation of leukocyte activation	16	7.6555	0.0137529	ENSMUSG00000031451, ENSMUSG00000023992, ENSMUSG00000060586, ENSMUSG00000041202, ENSMUSG00000024610, ENSMUSG00000040152, ENSMUSG00000002602, ENSMUSG00000036594, ENSMUSG00000035042, ENSMUSG00000030748, ENSMUSG00000067212, ENSMUSG00000037440, ENSMUSG00000056529, ENSMUSG00000073421, ENSMUSG00000038894, ENSMUSG00000034652	199	785	19596	2.00708	1	0.128132	0.117091
GOTERM_BP_FAT	GO:0031325~positive regulation of cellular metabolic process	50	23.9234	0.0138149	ENSMUSG00000054675, ENSMUSG00000031870, ENSMUSG00000024621, ENSMUSG00000021356, ENSMUSG00000044786, ENSMUSG00000089774, ENSMUSG00000032726, ENSMUSG00000039910, ENSMUSG00000031980, ENSMUSG00000026077, ENSMUSG00000055254, ENSMUSG00000023046, ENSMUSG00000024610, ENSMUSG00000002602, ENSMUSG00000038894, ENSMUSG00000030854, ENSMUSG00000017737, ENSMUSG00000034652, ENSMUSG00000032359, ENSMUSG00000034009,…	199	3584	19596	1.37378	1	0.128454	0.117386
GOTERM_BP_FAT	GO:0090185~negative regulation of kidney development	3	1.43541	0.0139733	ENSMUSG00000048387, ENSMUSG00000016458, ENSMUSG00000017737	199	18	19596	16.4121	1	0.129669	0.118496
GOTERM_BP_FAT	GO:0048729~tissue morphogenesis	15	7.17703	0.0140755	ENSMUSG00000036856, ENSMUSG00000031870, ENSMUSG00000031980, ENSMUSG00000048387, ENSMUSG00000027004, ENSMUSG00000000120, ENSMUSG00000022346, ENSMUSG00000020733, ENSMUSG00000016458, ENSMUSG00000045680, ENSMUSG00000032359, ENSMUSG00000037820, ENSMUSG00000031972, ENSMUSG00000039910, ENSMUSG00000035403	199	715	19596	2.06585	1	0.129845	0.118656
GOTERM_BP_FAT	GO:0031646~positive regulation of neurological system process	4	1.91388	0.0140589	ENSMUSG00000037868, ENSMUSG00000036098, ENSMUSG00000056529, ENSMUSG00000000120	199	50	19596	7.87779	1	0.129845	0.118656
GOTERM_BP_FAT	GO:0016049~cell growth	12	5.74163	0.014027	ENSMUSG00000030222, ENSMUSG00000019970, ENSMUSG00000047787, ENSMUSG00000031980, ENSMUSG00000016458, ENSMUSG00000040249, ENSMUSG00000027004, ENSMUSG00000025789, ENSMUSG00000025885, ENSMUSG00000024621, ENSMUSG00000056427, ENSMUSG00000018920	199	506	19596	2.33531	1	0.129845	0.118656
GOTERM_BP_FAT	GO:0043409~negative regulation of MAPK cascade	7	3.34928	0.0141414	ENSMUSG00000031980, ENSMUSG00000020733, ENSMUSG00000052397, ENSMUSG00000023992, ENSMUSG00000030854, ENSMUSG00000034652, ENSMUSG00000028967	199	194	19596	3.55313	1	0.130195	0.118977
GOTERM_BP_FAT	GO:0006873~cellular ion homeostasis	15	7.17703	0.0142316	ENSMUSG00000031980, ENSMUSG00000005360, ENSMUSG00000049112, ENSMUSG00000040249, ENSMUSG00000033161, ENSMUSG00000022346, ENSMUSG00000022840, ENSMUSG00000019970, ENSMUSG00000027716, ENSMUSG00000020733, ENSMUSG00000035042, ENSMUSG00000009185, ENSMUSG00000037820, ENSMUSG00000019787, ENSMUSG00000030730	199	716	19596	2.06297	1	0.130769	0.119501
GOTERM_BP_FAT	GO:0070997~neuron death	11	5.26316	0.0142793	ENSMUSG00000031980, ENSMUSG00000002602, ENSMUSG00000035042, ENSMUSG00000055254, ENSMUSG00000021250, ENSMUSG00000040249, ENSMUSG00000023992, ENSMUSG00000030854, ENSMUSG00000025789, ENSMUSG00000000120, ENSMUSG00000036887	199	440	19596	2.46181	1	0.130949	0.119666
GOTERM_BP_FAT	GO:2000146~negative regulation of cell motility	9	4.30622	0.0147471	ENSMUSG00000040152, ENSMUSG00000041120, ENSMUSG00000036856, ENSMUSG00000020733, ENSMUSG00000040249, ENSMUSG00000034652, ENSMUSG00000000120, ENSMUSG00000039910, ENSMUSG00000024610	199	314	19596	2.82246	1	0.134975	0.123345
GOTERM_BP_FAT	GO:0006897~endocytosis	17	8.13397	0.0148729	ENSMUSG00000031451, ENSMUSG00000032089, ENSMUSG00000028871, ENSMUSG00000052397, ENSMUSG00000056870, ENSMUSG00000040249, ENSMUSG00000023992, ENSMUSG00000027322, ENSMUSG00000020961, ENSMUSG00000040152, ENSMUSG00000002602, ENSMUSG00000037379, ENSMUSG00000030854, ENSMUSG00000057729, ENSMUSG00000034652, ENSMUSG00000037820, ENSMUSG00000018920	199	866	19596	1.93306	1	0.13586	0.124154
GOTERM_BP_FAT	GO:0097435~supramolecular fiber organization	16	7.6555	0.0151062	ENSMUSG00000029860, ENSMUSG00000036856, ENSMUSG00000049382, ENSMUSG00000052397, ENSMUSG00000057003, ENSMUSG00000023992, ENSMUSG00000020186, ENSMUSG00000020473, ENSMUSG00000006931, ENSMUSG00000025885, ENSMUSG00000021798, ENSMUSG00000019970, ENSMUSG00000068699, ENSMUSG00000020911, ENSMUSG00000031972, ENSMUSG00000019787	199	794	19596	1.98433	1	0.137674	0.125811
GOTERM_BP_FAT	GO:0035239~tube morphogenesis	11	5.26316	0.0151303	ENSMUSG00000036856, ENSMUSG00000031980, ENSMUSG00000031870, ENSMUSG00000048387, ENSMUSG00000016458, ENSMUSG00000045680, ENSMUSG00000043969, ENSMUSG00000037820, ENSMUSG00000032359, ENSMUSG00000039910, ENSMUSG00000022346	199	445	19596	2.43415	1	0.137674	0.125811
GOTERM_BP_FAT	GO:0040007~growth	20	9.56938	0.0154144	ENSMUSG00000034612, ENSMUSG00000030222, ENSMUSG00000031980, ENSMUSG00000028487, ENSMUSG00000018849, ENSMUSG00000052397, ENSMUSG00000040249, ENSMUSG00000027004, ENSMUSG00000025789, ENSMUSG00000025885, ENSMUSG00000027656, ENSMUSG00000024621, ENSMUSG00000040152, ENSMUSG00000020027, ENSMUSG00000019970, ENSMUSG00000047787, ENSMUSG00000016458, ENSMUSG00000039910, ENSMUSG00000056427, ENSMUSG00000018920	199	1096	19596	1.79694	1	0.139986	0.127924
GOTERM_BP_FAT	GO:0040037~negative regulation of fibroblast growth factor receptor signaling pathway	3	1.43541	0.0155144	ENSMUSG00000040152, ENSMUSG00000036856, ENSMUSG00000000120	199	19	19596	15.5483	1	0.140622	0.128505
GOTERM_BP_FAT	GO:0031399~regulation of protein modification process	31	14.8325	0.0156648	ENSMUSG00000031451, ENSMUSG00000054675, ENSMUSG00000052397, ENSMUSG00000086962, ENSMUSG00000040249, ENSMUSG00000023992, ENSMUSG00000028967, ENSMUSG00000024621, ENSMUSG00000035692, ENSMUSG00000032726, ENSMUSG00000074345, ENSMUSG00000039533, ENSMUSG00000031980, ENSMUSG00000028871, ENSMUSG00000018849, ENSMUSG00000078853, ENSMUSG00000055254, ENSMUSG00000023046, ENSMUSG00000000120, ENSMUSG00000024610,…	199	1978	19596	1.5433	1	0.141711	0.1295
GOTERM_BP_FAT	GO:0071674~mononuclear cell migration	5	2.39234	0.0157717	ENSMUSG00000040152, ENSMUSG00000041120, ENSMUSG00000035042, ENSMUSG00000009185, ENSMUSG00000024621	199	95	19596	5.18276	1	0.142402	0.130132
GOTERM_BP_FAT	GO:1901343~negative regulation of vasculature development	6	2.87081	0.0164325	ENSMUSG00000040152, ENSMUSG00000036856, ENSMUSG00000031980, ENSMUSG00000016458, ENSMUSG00000022893, ENSMUSG00000000120	199	146	19596	4.04681	1	0.147566	0.134851
GOTERM_BP_FAT	GO:0045933~positive regulation of muscle contraction	4	1.91388	0.0164383	ENSMUSG00000049112, ENSMUSG00000056529, ENSMUSG00000033161, ENSMUSG00000030730	199	53	19596	7.43188	1	0.147566	0.134851
GOTERM_BP_FAT	GO:0042471~ear morphogenesis	6	2.87081	0.0164325	ENSMUSG00000020733, ENSMUSG00000057322, ENSMUSG00000048387, ENSMUSG00000027004, ENSMUSG00000074622, ENSMUSG00000022346	199	146	19596	4.04681	1	0.147566	0.134851
GOTERM_BP_FAT	GO:0071222~cellular response to lipopolysaccharide	9	4.30622	0.0172246	ENSMUSG00000069874, ENSMUSG00000044786, ENSMUSG00000078853, ENSMUSG00000002602, ENSMUSG00000035042, ENSMUSG00000037379, ENSMUSG00000023992, ENSMUSG00000105096, ENSMUSG00000018920	199	324	19596	2.73534	1	0.152927	0.13975
GOTERM_BP_FAT	GO:0050808~synapse organization	10	4.78469	0.0171512	ENSMUSG00000047414, ENSMUSG00000047787, ENSMUSG00000036905, ENSMUSG00000055254, ENSMUSG00000020704, ENSMUSG00000049112, ENSMUSG00000023992, ENSMUSG00000025789, ENSMUSG00000036896, ENSMUSG00000036887	199	387	19596	2.54451	1	0.152927	0.13975
GOTERM_BP_FAT	GO:0048878~chemical homeostasis	23	11.0048	0.0171707	ENSMUSG00000031451, ENSMUSG00000031980, ENSMUSG00000005360, ENSMUSG00000031075, ENSMUSG00000032373, ENSMUSG00000027593, ENSMUSG00000049112, ENSMUSG00000040249, ENSMUSG00000033161, ENSMUSG00000023992, ENSMUSG00000000120, ENSMUSG00000022346, ENSMUSG00000022840, ENSMUSG00000019970, ENSMUSG00000027716, ENSMUSG00000020733, ENSMUSG00000035042, ENSMUSG00000009185, ENSMUSG00000038894, ENSMUSG00000032359,…	199	1343	19596	1.68642	1	0.152927	0.13975
GOTERM_BP_FAT	GO:0033554~cellular response to stress	31	14.8325	0.0172317	ENSMUSG00000031453, ENSMUSG00000031451, ENSMUSG00000031075, ENSMUSG00000024042, ENSMUSG00000052397, ENSMUSG00000017969, ENSMUSG00000021250, ENSMUSG00000040249, ENSMUSG00000023992, ENSMUSG00000028967, ENSMUSG00000022346, ENSMUSG00000042842, ENSMUSG00000015340, ENSMUSG00000021215, ENSMUSG00000044786, ENSMUSG00000052934, ENSMUSG00000039910, ENSMUSG00000036856, ENSMUSG00000031980, ENSMUSG00000026077,…	199	1993	19596	1.53168	1	0.152927	0.13975
GOTERM_BP_FAT	GO:0032940~secretion by cell	18	8.61244	0.0171879	ENSMUSG00000031980, ENSMUSG00000031075, ENSMUSG00000052397, ENSMUSG00000055254, ENSMUSG00000055980, ENSMUSG00000049112, ENSMUSG00000040249, ENSMUSG00000023992, ENSMUSG00000025885, ENSMUSG00000022840, ENSMUSG00000002602, ENSMUSG00000035042, ENSMUSG00000030748, ENSMUSG00000009185, ENSMUSG00000056529, ENSMUSG00000032726, ENSMUSG00000038894, ENSMUSG00000034652	199	956	19596	1.85408	1	0.152927	0.13975
GOTERM_BP_FAT	GO:0010934~macrophage cytokine production	3	1.43541	0.0171248	ENSMUSG00000031451, ENSMUSG00000037379, ENSMUSG00000024610	199	20	19596	14.7709	1	0.152927	0.13975
GOTERM_BP_FAT	GO:1903038~negative regulation of leukocyte cell-cell adhesion	6	2.87081	0.017786	ENSMUSG00000036594, ENSMUSG00000030748, ENSMUSG00000073421, ENSMUSG00000034652, ENSMUSG00000041202, ENSMUSG00000024610	199	149	19596	3.96533	1	0.156069	0.142621
GOTERM_BP_FAT	GO:0045321~leukocyte activation	21	10.0478	0.0177313	ENSMUSG00000036856, ENSMUSG00000031451, ENSMUSG00000051495, ENSMUSG00000023992, ENSMUSG00000060586, ENSMUSG00000041202, ENSMUSG00000021356, ENSMUSG00000024610, ENSMUSG00000040152, ENSMUSG00000002602, ENSMUSG00000036594, ENSMUSG00000035042, ENSMUSG00000030748, ENSMUSG00000067212, ENSMUSG00000037440, ENSMUSG00000056529, ENSMUSG00000073421, ENSMUSG00000038894, ENSMUSG00000074622, ENSMUSG00000034652,…	199	1190	19596	1.73775	1	0.156069	0.142621
GOTERM_BP_FAT	GO:0042157~lipoprotein metabolic process	6	2.87081	0.017786	ENSMUSG00000068246, ENSMUSG00000057346, ENSMUSG00000069874, ENSMUSG00000078853, ENSMUSG00000040249, ENSMUSG00000090698	199	149	19596	3.96533	1	0.156069	0.142621
GOTERM_BP_FAT	GO:0031960~response to corticosteroid	7	3.34928	0.0177012	ENSMUSG00000015340, ENSMUSG00000044786, ENSMUSG00000019970, ENSMUSG00000056529, ENSMUSG00000021250, ENSMUSG00000028967, ENSMUSG00000056427	199	204	19596	3.37895	1	0.156069	0.142621
GOTERM_BP_FAT	GO:0002695~negative regulation of leukocyte activation	7	3.34928	0.0177012	ENSMUSG00000002602, ENSMUSG00000036594, ENSMUSG00000030748, ENSMUSG00000073421, ENSMUSG00000034652, ENSMUSG00000041202, ENSMUSG00000024610	199	204	19596	3.37895	1	0.156069	0.142621
GOTERM_BP_FAT	GO:0002274~myeloid leukocyte activation	8	3.82775	0.0177548	ENSMUSG00000040152, ENSMUSG00000035042, ENSMUSG00000030748, ENSMUSG00000056529, ENSMUSG00000023992, ENSMUSG00000034652, ENSMUSG00000036887, ENSMUSG00000021356	199	263	19596	2.99536	1	0.156069	0.142621
GOTERM_BP_FAT	GO:0050708~regulation of protein secretion	9	4.30622	0.0178758	ENSMUSG00000031075, ENSMUSG00000052397, ENSMUSG00000035042, ENSMUSG00000055980, ENSMUSG00000032726, ENSMUSG00000040249, ENSMUSG00000023992, ENSMUSG00000038894, ENSMUSG00000022840	199	325	19596	2.72693	1	0.156564	0.143073
GOTERM_BP_FAT	GO:0090092~regulation of transmembrane receptor protein serine/threonine kinase signaling pathway	8	3.82775	0.0181154	ENSMUSG00000040152, ENSMUSG00000034612, ENSMUSG00000041120, ENSMUSG00000032726, ENSMUSG00000040249, ENSMUSG00000006205, ENSMUSG00000039910, ENSMUSG00000035403	199	264	19596	2.98401	1	0.157483	0.143913
GOTERM_BP_FAT	GO:0071383~cellular response to steroid hormone stimulus	7	3.34928	0.0180673	ENSMUSG00000044786, ENSMUSG00000019970, ENSMUSG00000031870, ENSMUSG00000055254, ENSMUSG00000045680, ENSMUSG00000033161, ENSMUSG00000028967	199	205	19596	3.36247	1	0.157483	0.143913
GOTERM_BP_FAT	GO:0032651~regulation of interleukin-1 beta production	5	2.39234	0.0180824	ENSMUSG00000023992, ENSMUSG00000073489, ENSMUSG00000054203, ENSMUSG00000026536, ENSMUSG00000028967	199	99	19596	4.97335	1	0.157483	0.143913
GOTERM_BP_FAT	GO:0032611~interleukin-1 beta production	5	2.39234	0.0180824	ENSMUSG00000023992, ENSMUSG00000073489, ENSMUSG00000054203, ENSMUSG00000026536, ENSMUSG00000028967	199	99	19596	4.97335	1	0.157483	0.143913
GOTERM_BP_FAT	GO:0002526~acute inflammatory response	6	2.87081	0.0182541	ENSMUSG00000035042, ENSMUSG00000067212, ENSMUSG00000037440, ENSMUSG00000023992, ENSMUSG00000041202, ENSMUSG00000040026	199	150	19596	3.93889	1	0.158394	0.144745
GOTERM_BP_FAT	GO:0009991~response to extracellular stimulus	13	6.2201	0.0183209	ENSMUSG00000036856, ENSMUSG00000031451, ENSMUSG00000024042, ENSMUSG00000048087, ENSMUSG00000021250, ENSMUSG00000027597, ENSMUSG00000015340, ENSMUSG00000044786, ENSMUSG00000002602, ENSMUSG00000032726, ENSMUSG00000017737, ENSMUSG00000073489, ENSMUSG00000031972	199	596	19596	2.14789	1	0.15868	0.145007
GOTERM_BP_FAT	GO:0050796~regulation of insulin secretion	7	3.34928	0.0184837	ENSMUSG00000031075, ENSMUSG00000035042, ENSMUSG00000055980, ENSMUSG00000032726, ENSMUSG00000040249, ENSMUSG00000038894, ENSMUSG00000022840	199	206	19596	3.34615	1	0.159794	0.146025
GOTERM_BP_FAT	GO:0098771~inorganic ion homeostasis	16	7.6555	0.0186652	ENSMUSG00000031980, ENSMUSG00000005360, ENSMUSG00000032373, ENSMUSG00000049112, ENSMUSG00000040249, ENSMUSG00000033161, ENSMUSG00000022346, ENSMUSG00000022840, ENSMUSG00000019970, ENSMUSG00000027716, ENSMUSG00000020733, ENSMUSG00000035042, ENSMUSG00000009185, ENSMUSG00000037820, ENSMUSG00000019787, ENSMUSG00000030730	199	815	19596	1.9332	1	0.161065	0.147187
GOTERM_BP_FAT	GO:0070230~positive regulation of lymphocyte apoptotic process	3	1.43541	0.0188031	ENSMUSG00000035042, ENSMUSG00000027322, ENSMUSG00000022346	199	21	19596	14.0675	1	0.161658	0.147729
GOTERM_BP_FAT	GO:0032656~regulation of interleukin-13 production	3	1.43541	0.0188031	ENSMUSG00000067212, ENSMUSG00000002897, ENSMUSG00000021356	199	21	19596	14.0675	1	0.161658	0.147729
GOTERM_BP_FAT	GO:0070169~positive regulation of biomineral tissue development	4	1.91388	0.0190297	ENSMUSG00000036856, ENSMUSG00000054675, ENSMUSG00000035692, ENSMUSG00000048387	199	56	19596	7.03374	1	0.163307	0.149235
GOTERM_BP_FAT	GO:0071347~cellular response to interleukin-1	5	2.39234	0.0193125	ENSMUSG00000017969, ENSMUSG00000035042, ENSMUSG00000009185, ENSMUSG00000040026, ENSMUSG00000022346	199	101	19596	4.87487	1	0.16543	0.151175
GOTERM_BP_FAT	GO:0050801~ion homeostasis	17	8.13397	0.0196314	ENSMUSG00000031980, ENSMUSG00000005360, ENSMUSG00000032373, ENSMUSG00000049112, ENSMUSG00000040249, ENSMUSG00000033161, ENSMUSG00000000120, ENSMUSG00000022346, ENSMUSG00000022840, ENSMUSG00000019970, ENSMUSG00000027716, ENSMUSG00000020733, ENSMUSG00000035042, ENSMUSG00000009185, ENSMUSG00000037820, ENSMUSG00000019787, ENSMUSG00000030730	199	895	19596	1.87042	1	0.167617	0.153174
GOTERM_BP_FAT	GO:0002009~morphogenesis of an epithelium	13	6.2201	0.0196395	ENSMUSG00000036856, ENSMUSG00000031870, ENSMUSG00000031980, ENSMUSG00000048387, ENSMUSG00000027004, ENSMUSG00000000120, ENSMUSG00000022346, ENSMUSG00000020733, ENSMUSG00000016458, ENSMUSG00000045680, ENSMUSG00000032359, ENSMUSG00000037820, ENSMUSG00000039910	199	602	19596	2.12648	1	0.167617	0.153174
GOTERM_BP_FAT	GO:1904300~positive regulation of transcytosis	2	0.956938	0.0201066	ENSMUSG00000056529, ENSMUSG00000040249	199	2	19596	98.4724	1	0.168227	0.153731
GOTERM_BP_FAT	GO:1904298~regulation of transcytosis	2	0.956938	0.0201066	ENSMUSG00000056529, ENSMUSG00000040249	199	2	19596	98.4724	1	0.168227	0.153731
GOTERM_BP_FAT	GO:0090094~metanephric cap mesenchymal cell proliferation involved in metanephros development	2	0.956938	0.0201066	ENSMUSG00000048387, ENSMUSG00000022346	199	2	19596	98.4724	1	0.168227	0.153731
GOTERM_BP_FAT	GO:0072186~metanephric cap morphogenesis	2	0.956938	0.0201066	ENSMUSG00000048387, ENSMUSG00000022346	199	2	19596	98.4724	1	0.168227	0.153731
GOTERM_BP_FAT	GO:0072185~metanephric cap development	2	0.956938	0.0201066	ENSMUSG00000048387, ENSMUSG00000022346	199	2	19596	98.4724	1	0.168227	0.153731
GOTERM_BP_FAT	GO:0072166~posterior mesonephric tubule development	2	0.956938	0.0201066	ENSMUSG00000048387, ENSMUSG00000016458	199	2	19596	98.4724	1	0.168227	0.153731
GOTERM_BP_FAT	GO:0048247~lymphocyte chemotaxis	4	1.91388	0.0199409	ENSMUSG00000031451, ENSMUSG00000035042, ENSMUSG00000009185, ENSMUSG00000018920	199	57	19596	6.91034	1	0.168227	0.153731
GOTERM_BP_FAT	GO:0035802~adrenal cortex formation	2	0.956938	0.0201066	ENSMUSG00000016458, ENSMUSG00000039910	199	2	19596	98.4724	1	0.168227	0.153731
GOTERM_BP_FAT	GO:0021545~cranial nerve development	4	1.91388	0.0199409	ENSMUSG00000037868, ENSMUSG00000005360, ENSMUSG00000074622, ENSMUSG00000039910	199	57	19596	6.91034	1	0.168227	0.153731
GOTERM_BP_FAT	GO:0019510~S-adenosylhomocysteine catabolic process	2	0.956938	0.0201066	ENSMUSG00000048087, ENSMUSG00000027597	199	2	19596	98.4724	1	0.168227	0.153731
GOTERM_BP_FAT	GO:0002690~positive regulation of leukocyte chemotaxis	5	2.39234	0.0199465	ENSMUSG00000040152, ENSMUSG00000031451, ENSMUSG00000035042, ENSMUSG00000024621, ENSMUSG00000024610	199	102	19596	4.82708	1	0.168227	0.153731
GOTERM_BP_FAT	GO:0071219~cellular response to molecule of bacterial origin	9	4.30622	0.0201983	ENSMUSG00000069874, ENSMUSG00000044786, ENSMUSG00000078853, ENSMUSG00000002602, ENSMUSG00000035042, ENSMUSG00000037379, ENSMUSG00000023992, ENSMUSG00000105096, ENSMUSG00000018920	199	333	19596	2.66142	1	0.168391	0.153882
GOTERM_BP_FAT	GO:0007178~transmembrane receptor protein serine/threonine kinase signaling pathway	10	4.78469	0.0201955	ENSMUSG00000040152, ENSMUSG00000034612, ENSMUSG00000041120, ENSMUSG00000029860, ENSMUSG00000021250, ENSMUSG00000032726, ENSMUSG00000040249, ENSMUSG00000006205, ENSMUSG00000039910, ENSMUSG00000035403	199	398	19596	2.47418	1	0.168391	0.153882
GOTERM_BP_FAT	GO:0010817~regulation of hormone levels	13	6.2201	0.0203249	ENSMUSG00000036856, ENSMUSG00000031980, ENSMUSG00000031075, ENSMUSG00000055980, ENSMUSG00000040249, ENSMUSG00000033161, ENSMUSG00000022840, ENSMUSG00000025955, ENSMUSG00000024713, ENSMUSG00000035042, ENSMUSG00000032726, ENSMUSG00000038894, ENSMUSG00000033715	199	605	19596	2.11594	1	0.169145	0.154571
GOTERM_BP_FAT	GO:0072202~cell differentiation involved in metanephros development	3	1.43541	0.0205476	ENSMUSG00000036856, ENSMUSG00000048387, ENSMUSG00000045680	199	22	19596	13.428	1	0.170392	0.15571
GOTERM_BP_FAT	GO:0032616~interleukin-13 production	3	1.43541	0.0205476	ENSMUSG00000067212, ENSMUSG00000002897, ENSMUSG00000021356	199	22	19596	13.428	1	0.170392	0.15571
GOTERM_BP_FAT	GO:0043434~response to peptide hormone	11	5.26316	0.0206851	ENSMUSG00000015340, ENSMUSG00000037868, ENSMUSG00000020027, ENSMUSG00000019970, ENSMUSG00000031980, ENSMUSG00000049112, ENSMUSG00000055980, ENSMUSG00000038894, ENSMUSG00000028967, ENSMUSG00000022346, ENSMUSG00000030730	199	467	19596	2.31948	1	0.171229	0.156475
GOTERM_BP_FAT	GO:0030182~neuron differentiation	26	12.4402	0.0208659	ENSMUSG00000005360, ENSMUSG00000040249, ENSMUSG00000024621, ENSMUSG00000047414, ENSMUSG00000020027, ENSMUSG00000039533, ENSMUSG00000052934, ENSMUSG00000036887, ENSMUSG00000036856, ENSMUSG00000037868, ENSMUSG00000031980, ENSMUSG00000055254, ENSMUSG00000028654, ENSMUSG00000043969, ENSMUSG00000000120, ENSMUSG00000025789, ENSMUSG00000022893, ENSMUSG00000025885, ENSMUSG00000041120, ENSMUSG00000047787,…	199	1611	19596	1.58925	1	0.172197	0.157359
GOTERM_BP_FAT	GO:0010463~mesenchymal cell proliferation	4	1.91388	0.0208757	ENSMUSG00000055980, ENSMUSG00000048387, ENSMUSG00000038894, ENSMUSG00000022346	199	58	19596	6.7912	1	0.172197	0.157359
GOTERM_BP_FAT	GO:0071407~cellular response to organic cyclic compound	14	6.69856	0.021263	ENSMUSG00000031870, ENSMUSG00000005360, ENSMUSG00000052397, ENSMUSG00000055254, ENSMUSG00000033161, ENSMUSG00000028967, ENSMUSG00000022346, ENSMUSG00000022840, ENSMUSG00000044786, ENSMUSG00000019970, ENSMUSG00000035042, ENSMUSG00000056529, ENSMUSG00000045680, ENSMUSG00000037820	199	681	19596	2.0244	1	0.174491	0.159456
GOTERM_BP_FAT	GO:0040008~regulation of growth	15	7.17703	0.0212212	ENSMUSG00000030222, ENSMUSG00000031451, ENSMUSG00000031980, ENSMUSG00000018849, ENSMUSG00000052397, ENSMUSG00000040249, ENSMUSG00000027004, ENSMUSG00000025885, ENSMUSG00000027656, ENSMUSG00000020027, ENSMUSG00000019970, ENSMUSG00000016458, ENSMUSG00000039910, ENSMUSG00000056427, ENSMUSG00000018920	199	754	19596	1.959	1	0.174491	0.159456
GOTERM_BP_FAT	GO:0010001~glial cell differentiation	8	3.82775	0.0212658	ENSMUSG00000037868, ENSMUSG00000031980, ENSMUSG00000055254, ENSMUSG00000036098, ENSMUSG00000040249, ENSMUSG00000023992, ENSMUSG00000024621, ENSMUSG00000036887	199	273	19596	2.88564	1	0.174491	0.159456
GOTERM_BP_FAT	GO:0007519~skeletal muscle tissue development	7	3.34928	0.0213798	ENSMUSG00000037868, ENSMUSG00000057003, ENSMUSG00000021250, ENSMUSG00000045680, ENSMUSG00000031972, ENSMUSG00000039910, ENSMUSG00000022346	199	213	19596	3.23618	1	0.17512	0.16003
GOTERM_BP_FAT	GO:0045926~negative regulation of growth	8	3.82775	0.021615	ENSMUSG00000020027, ENSMUSG00000030222, ENSMUSG00000031980, ENSMUSG00000018849, ENSMUSG00000016458, ENSMUSG00000027004, ENSMUSG00000039910, ENSMUSG00000056427	199	274	19596	2.87511	1	0.176737	0.161508
GOTERM_BP_FAT	GO:0001558~regulation of cell growth	11	5.26316	0.0217802	ENSMUSG00000020027, ENSMUSG00000030222, ENSMUSG00000019970, ENSMUSG00000031980, ENSMUSG00000016458, ENSMUSG00000040249, ENSMUSG00000027004, ENSMUSG00000025885, ENSMUSG00000027656, ENSMUSG00000056427, ENSMUSG00000018920	199	471	19596	2.29978	1	0.177777	0.162458
GOTERM_BP_FAT	GO:0071622~regulation of granulocyte chemotaxis	4	1.91388	0.0218342	ENSMUSG00000040152, ENSMUSG00000035042, ENSMUSG00000024621, ENSMUSG00000024610	199	59	19596	6.67609	1	0.177907	0.162578
GOTERM_BP_FAT	GO:0070227~lymphocyte apoptotic process	5	2.39234	0.0219251	ENSMUSG00000035042, ENSMUSG00000038894, ENSMUSG00000027322, ENSMUSG00000022346, ENSMUSG00000024610	199	105	19596	4.68916	1	0.178337	0.16297
GOTERM_BP_FAT	GO:0050730~regulation of peptidyl-tyrosine phosphorylation	8	3.82775	0.0220196	ENSMUSG00000031451, ENSMUSG00000031980, ENSMUSG00000035042, ENSMUSG00000023992, ENSMUSG00000034652, ENSMUSG00000028967, ENSMUSG00000024621, ENSMUSG00000024610	199	275	19596	2.86465	1	0.178795	0.163389
GOTERM_BP_FAT	GO:0050921~positive regulation of chemotaxis	6	2.87081	0.0222553	ENSMUSG00000040152, ENSMUSG00000031451, ENSMUSG00000035042, ENSMUSG00000023992, ENSMUSG00000024621, ENSMUSG00000024610	199	158	19596	3.73946	1	0.180395	0.164851
GOTERM_BP_FAT	GO:0072111~cell proliferation involved in kidney development	3	1.43541	0.0223569	ENSMUSG00000048387, ENSMUSG00000016458, ENSMUSG00000022346	199	23	19596	12.8442	1	0.180905	0.165317
GOTERM_BP_FAT	GO:0070167~regulation of biomineral tissue development	5	2.39234	0.0226103	ENSMUSG00000036856, ENSMUSG00000031451, ENSMUSG00000054675, ENSMUSG00000035692, ENSMUSG00000048387	199	106	19596	4.64492	1	0.18264	0.166902
GOTERM_BP_FAT	GO:0071675~regulation of mononuclear cell migration	4	1.91388	0.0228165	ENSMUSG00000040152, ENSMUSG00000041120, ENSMUSG00000035042, ENSMUSG00000024621	199	60	19596	6.56482	1	0.183988	0.168134
GOTERM_BP_FAT	GO:0045765~regulation of angiogenesis	9	4.30622	0.0229321	ENSMUSG00000040152, ENSMUSG00000015340, ENSMUSG00000031980, ENSMUSG00000017969, ENSMUSG00000035042, ENSMUSG00000017737, ENSMUSG00000022893, ENSMUSG00000000120, ENSMUSG00000032359	199	341	19596	2.59898	1	0.184601	0.168695
GOTERM_BP_FAT	GO:0050865~regulation of cell activation	16	7.6555	0.0230489	ENSMUSG00000031451, ENSMUSG00000023992, ENSMUSG00000060586, ENSMUSG00000041202, ENSMUSG00000024610, ENSMUSG00000040152, ENSMUSG00000002602, ENSMUSG00000036594, ENSMUSG00000035042, ENSMUSG00000030748, ENSMUSG00000067212, ENSMUSG00000037440, ENSMUSG00000056529, ENSMUSG00000073421, ENSMUSG00000038894, ENSMUSG00000034652	199	837	19596	1.88239	1	0.185223	0.169263
GOTERM_BP_FAT	GO:0002790~peptide secretion	11	5.26316	0.0232272	ENSMUSG00000031980, ENSMUSG00000031075, ENSMUSG00000052397, ENSMUSG00000035042, ENSMUSG00000055980, ENSMUSG00000032726, ENSMUSG00000040249, ENSMUSG00000023992, ENSMUSG00000038894, ENSMUSG00000022840, ENSMUSG00000024610	199	475	19596	2.28041	1	0.186336	0.17028
GOTERM_BP_FAT	GO:0022602~ovulation cycle process	5	2.39234	0.0233084	ENSMUSG00000031980, ENSMUSG00000031870, ENSMUSG00000022893, ENSMUSG00000022346, ENSMUSG00000056427	199	107	19596	4.60151	1	0.186667	0.170583
GOTERM_BP_FAT	GO:0055078~sodium ion homeostasis	4	1.91388	0.0238225	ENSMUSG00000019970, ENSMUSG00000031980, ENSMUSG00000005360, ENSMUSG00000033161	199	61	19596	6.4572	1	0.189809	0.173454
GOTERM_BP_FAT	GO:0006693~prostaglandin metabolic process	4	1.91388	0.0238225	ENSMUSG00000025955, ENSMUSG00000017969, ENSMUSG00000033715, ENSMUSG00000024610	199	61	19596	6.4572	1	0.189809	0.173454
GOTERM_BP_FAT	GO:0006692~prostanoid metabolic process	4	1.91388	0.0238225	ENSMUSG00000025955, ENSMUSG00000017969, ENSMUSG00000033715, ENSMUSG00000024610	199	61	19596	6.4572	1	0.189809	0.173454
GOTERM_BP_FAT	GO:0098655~cation transmembrane transport	15	7.17703	0.0243624	ENSMUSG00000031451, ENSMUSG00000031980, ENSMUSG00000005360, ENSMUSG00000048387, ENSMUSG00000033161, ENSMUSG00000023992, ENSMUSG00000023243, ENSMUSG00000027716, ENSMUSG00000050856, ENSMUSG00000020733, ENSMUSG00000020704, ENSMUSG00000017737, ENSMUSG00000038642, ENSMUSG00000019787, ENSMUSG00000030730	199	768	19596	1.92329	1	0.19378	0.177083
GOTERM_BP_FAT	GO:0050729~positive regulation of inflammatory response	6	2.87081	0.0245002	ENSMUSG00000035042, ENSMUSG00000067212, ENSMUSG00000038642, ENSMUSG00000002897, ENSMUSG00000037820, ENSMUSG00000027514	199	162	19596	3.64712	1	0.194546	0.177783
GOTERM_BP_FAT	GO:0046651~lymphocyte proliferation	9	4.30622	0.0248039	ENSMUSG00000036856, ENSMUSG00000036594, ENSMUSG00000035042, ENSMUSG00000067212, ENSMUSG00000073421, ENSMUSG00000038894, ENSMUSG00000034652, ENSMUSG00000041202, ENSMUSG00000024610	199	346	19596	2.56142	1	0.196623	0.179681
GOTERM_BP_FAT	GO:1905517~macrophage migration	4	1.91388	0.0248523	ENSMUSG00000040152, ENSMUSG00000035042, ENSMUSG00000023992, ENSMUSG00000024621	199	62	19596	6.35306	1	0.196674	0.179727
GOTERM_BP_FAT	GO:0007009~plasma membrane organization	10	4.78469	0.0249141	ENSMUSG00000033763, ENSMUSG00000031451, ENSMUSG00000020733, ENSMUSG00000052397, ENSMUSG00000036098, ENSMUSG00000040249, ENSMUSG00000078612, ENSMUSG00000023992, ENSMUSG00000074622, ENSMUSG00000025885	199	413	19596	2.38432	1	0.19683	0.17987
GOTERM_BP_FAT	GO:0010604~positive regulation of macromolecule metabolic process	48	22.9665	0.0249774	ENSMUSG00000031451, ENSMUSG00000054675, ENSMUSG00000031870, ENSMUSG00000052397, ENSMUSG00000086962, ENSMUSG00000055980, ENSMUSG00000021250, ENSMUSG00000040249, ENSMUSG00000023992, ENSMUSG00000022346, ENSMUSG00000021356, ENSMUSG00000024621, ENSMUSG00000044786, ENSMUSG00000016458, ENSMUSG00000032726, ENSMUSG00000074345, ENSMUSG00000074622, ENSMUSG00000039533, ENSMUSG00000071637, ENSMUSG00000031972,…	199	3531	19596	1.33862	1	0.196997	0.180023
GOTERM_BP_FAT	GO:0036211~protein modification process	52	24.8804	0.0250788	ENSMUSG00000054675, ENSMUSG00000040026, ENSMUSG00000024621, ENSMUSG00000021356, ENSMUSG00000044786, ENSMUSG00000020027, ENSMUSG00000051048, ENSMUSG00000032726, ENSMUSG00000039037, ENSMUSG00000052934, ENSMUSG00000031980, ENSMUSG00000055254, ENSMUSG00000023046, ENSMUSG00000025789, ENSMUSG00000024610, ENSMUSG00000019235, ENSMUSG00000020733, ENSMUSG00000002602, ENSMUSG00000033849, ENSMUSG00000034573,…	199	3890	19596	1.31634	1	0.197132	0.180146
GOTERM_BP_FAT	GO:0006464~cellular protein modification process	52	24.8804	0.0250788	ENSMUSG00000054675, ENSMUSG00000040026, ENSMUSG00000024621, ENSMUSG00000021356, ENSMUSG00000044786, ENSMUSG00000020027, ENSMUSG00000051048, ENSMUSG00000032726, ENSMUSG00000039037, ENSMUSG00000052934, ENSMUSG00000031980, ENSMUSG00000055254, ENSMUSG00000023046, ENSMUSG00000025789, ENSMUSG00000024610, ENSMUSG00000019235, ENSMUSG00000020733, ENSMUSG00000002602, ENSMUSG00000033849, ENSMUSG00000034573,…	199	3890	19596	1.31634	1	0.197132	0.180146
GOTERM_BP_FAT	GO:0046427~positive regulation of JAK-STAT cascade	5	2.39234	0.025481	ENSMUSG00000031980, ENSMUSG00000032089, ENSMUSG00000035042, ENSMUSG00000034652, ENSMUSG00000024621	199	110	19596	4.47602	1	0.199622	0.182422
GOTERM_BP_FAT	GO:0035282~segmentation	5	2.39234	0.025481	ENSMUSG00000037868, ENSMUSG00000048387, ENSMUSG00000016458, ENSMUSG00000074622, ENSMUSG00000035403	199	110	19596	4.47602	1	0.199622	0.182422
GOTERM_BP_FAT	GO:1903078~positive regulation of protein localization to plasma membrane	4	1.91388	0.0259057	ENSMUSG00000052397, ENSMUSG00000040249, ENSMUSG00000023992, ENSMUSG00000025885	199	63	19596	6.25221	1	0.201599	0.184228
GOTERM_BP_FAT	GO:0051271~negative regulation of cellular component movement	9	4.30622	0.0258646	ENSMUSG00000040152, ENSMUSG00000041120, ENSMUSG00000036856, ENSMUSG00000020733, ENSMUSG00000040249, ENSMUSG00000034652, ENSMUSG00000000120, ENSMUSG00000039910, ENSMUSG00000024610	199	349	19596	2.5394	1	0.201599	0.184228
GOTERM_BP_FAT	GO:0032943~mononuclear cell proliferation	9	4.30622	0.0258646	ENSMUSG00000036856, ENSMUSG00000036594, ENSMUSG00000035042, ENSMUSG00000067212, ENSMUSG00000073421, ENSMUSG00000038894, ENSMUSG00000034652, ENSMUSG00000041202, ENSMUSG00000024610	199	349	19596	2.5394	1	0.201599	0.184228
GOTERM_BP_FAT	GO:0030003~cellular cation homeostasis	14	6.69856	0.0258745	ENSMUSG00000031980, ENSMUSG00000005360, ENSMUSG00000049112, ENSMUSG00000040249, ENSMUSG00000033161, ENSMUSG00000022346, ENSMUSG00000022840, ENSMUSG00000019970, ENSMUSG00000027716, ENSMUSG00000035042, ENSMUSG00000009185, ENSMUSG00000037820, ENSMUSG00000019787, ENSMUSG00000030730	199	700	19596	1.96945	1	0.201599	0.184228
GOTERM_BP_FAT	GO:0031643~positive regulation of myelination	3	1.43541	0.0261639	ENSMUSG00000037868, ENSMUSG00000036098, ENSMUSG00000000120	199	25	19596	11.8167	1	0.202933	0.185447
GOTERM_BP_FAT	GO:0010759~positive regulation of macrophage chemotaxis	3	1.43541	0.0261639	ENSMUSG00000040152, ENSMUSG00000035042, ENSMUSG00000024621	199	25	19596	11.8167	1	0.202933	0.185447
GOTERM_BP_FAT	GO:0030316~osteoclast differentiation	5	2.39234	0.0262314	ENSMUSG00000035042, ENSMUSG00000021250, ENSMUSG00000023992, ENSMUSG00000074622, ENSMUSG00000024621	199	111	19596	4.43569	1	0.203119	0.185617
GOTERM_BP_FAT	GO:0015711~organic anion transport	11	5.26316	0.0274644	ENSMUSG00000040152, ENSMUSG00000031980, ENSMUSG00000020733, ENSMUSG00000005360, ENSMUSG00000055254, ENSMUSG00000048387, ENSMUSG00000074345, ENSMUSG00000032725, ENSMUSG00000038894, ENSMUSG00000041202, ENSMUSG00000022346	199	489	19596	2.21512	1	0.211965	0.193701
GOTERM_BP_FAT	GO:0006959~humoral immune response	11	5.26316	0.0274644	ENSMUSG00000073418, ENSMUSG00000036905, ENSMUSG00000001128, ENSMUSG00000067212, ENSMUSG00000009185, ENSMUSG00000026938, ENSMUSG00000073421, ENSMUSG00000037379, ENSMUSG00000023992, ENSMUSG00000036896, ENSMUSG00000036887	199	489	19596	2.21512	1	0.211965	0.193701
GOTERM_BP_FAT	GO:0044255~cellular lipid metabolic process	19	9.09091	0.0278596	ENSMUSG00000035835, ENSMUSG00000031980, ENSMUSG00000024042, ENSMUSG00000017969, ENSMUSG00000055980, ENSMUSG00000027875, ENSMUSG00000040249, ENSMUSG00000025789, ENSMUSG00000041202, ENSMUSG00000024621, ENSMUSG00000024610, ENSMUSG00000020027, ENSMUSG00000025955, ENSMUSG00000033849, ENSMUSG00000074345, ENSMUSG00000038894, ENSMUSG00000033715, ENSMUSG00000039037, ENSMUSG00000019139	199	1090	19596	1.71649	1	0.214661	0.196165
GOTERM_BP_FAT	GO:0072006~nephron development	6	2.87081	0.0280751	ENSMUSG00000036856, ENSMUSG00000031980, ENSMUSG00000048387, ENSMUSG00000016458, ENSMUSG00000045680, ENSMUSG00000022346	199	168	19596	3.51687	1	0.215546	0.196973
GOTERM_BP_FAT	GO:0042474~middle ear morphogenesis	3	1.43541	0.0281587	ENSMUSG00000057322, ENSMUSG00000048387, ENSMUSG00000022346	199	26	19596	11.3622	1	0.215546	0.196973
GOTERM_BP_FAT	GO:0019048~modulation by virus of host morphology or physiology	3	1.43541	0.0281587	ENSMUSG00000009185, ENSMUSG00000017737, ENSMUSG00000022346	199	26	19596	11.3622	1	0.215546	0.196973
GOTERM_BP_FAT	GO:0010517~regulation of phospholipase activity	4	1.91388	0.0280836	ENSMUSG00000031980, ENSMUSG00000035042, ENSMUSG00000056529, ENSMUSG00000040249	199	65	19596	6.05984	1	0.215546	0.196973
GOTERM_BP_FAT	GO:1904894~positive regulation of STAT cascade	5	2.39234	0.0285616	ENSMUSG00000031980, ENSMUSG00000032089, ENSMUSG00000035042, ENSMUSG00000034652, ENSMUSG00000024621	199	114	19596	4.31896	1	0.217244	0.198525
GOTERM_BP_FAT	GO:1902106~negative regulation of leukocyte differentiation	5	2.39234	0.0285616	ENSMUSG00000030748, ENSMUSG00000074622, ENSMUSG00000036896, ENSMUSG00000022346, ENSMUSG00000024610	199	114	19596	4.31896	1	0.217244	0.198525
GOTERM_BP_FAT	GO:0051251~positive regulation of lymphocyte activation	11	5.26316	0.0285664	ENSMUSG00000031451, ENSMUSG00000002602, ENSMUSG00000036594, ENSMUSG00000035042, ENSMUSG00000030748, ENSMUSG00000067212, ENSMUSG00000037440, ENSMUSG00000073421, ENSMUSG00000038894, ENSMUSG00000060586, ENSMUSG00000024610	199	493	19596	2.19715	1	0.217244	0.198525
GOTERM_BP_FAT	GO:0045069~regulation of viral genome replication	5	2.39234	0.0285616	ENSMUSG00000032661, ENSMUSG00000035042, ENSMUSG00000009185, ENSMUSG00000035692, ENSMUSG00000073489	199	114	19596	4.31896	1	0.217244	0.198525
GOTERM_BP_FAT	GO:0032635~interleukin-6 production	6	2.87081	0.0287071	ENSMUSG00000006014, ENSMUSG00000031451, ENSMUSG00000056529, ENSMUSG00000037379, ENSMUSG00000002897, ENSMUSG00000024610	199	169	19596	3.49606	1	0.217959	0.199179
GOTERM_BP_FAT	GO:0052548~regulation of endopeptidase activity	9	4.30622	0.0290351	ENSMUSG00000040152, ENSMUSG00000031451, ENSMUSG00000031980, ENSMUSG00000017737, ENSMUSG00000073489, ENSMUSG00000000120, ENSMUSG00000022346, ENSMUSG00000042842, ENSMUSG00000035403	199	357	19596	2.4825	1	0.219743	0.200809
GOTERM_BP_FAT	GO:0002764~immune response-regulating signaling pathway	12	5.74163	0.029036	ENSMUSG00000069874, ENSMUSG00000032661, ENSMUSG00000078853, ENSMUSG00000052397, ENSMUSG00000026938, ENSMUSG00000073421, ENSMUSG00000078612, ENSMUSG00000023992, ENSMUSG00000034652, ENSMUSG00000032359, ENSMUSG00000025017, ENSMUSG00000021356	199	565	19596	2.09145	1	0.219743	0.200809
GOTERM_BP_FAT	GO:0044087~regulation of cellular component biogenesis	19	9.09091	0.0291981	ENSMUSG00000036856, ENSMUSG00000031980, ENSMUSG00000052397, ENSMUSG00000078853, ENSMUSG00000057003, ENSMUSG00000055254, ENSMUSG00000049112, ENSMUSG00000040249, ENSMUSG00000023992, ENSMUSG00000025789, ENSMUSG00000022346, ENSMUSG00000025885, ENSMUSG00000069874, ENSMUSG00000047414, ENSMUSG00000019970, ENSMUSG00000047787, ENSMUSG00000024713, ENSMUSG00000035692, ENSMUSG00000020704	199	1096	19596	1.70709	1	0.220613	0.201603
GOTERM_BP_FAT	GO:1903707~negative regulation of hemopoiesis	6	2.87081	0.0293435	ENSMUSG00000044786, ENSMUSG00000030748, ENSMUSG00000074622, ENSMUSG00000036896, ENSMUSG00000022346, ENSMUSG00000024610	199	170	19596	3.4755	1	0.22129	0.202222
GOTERM_BP_FAT	GO:0044723~single-organism carbohydrate metabolic process	11	5.26316	0.0293823	ENSMUSG00000034612, ENSMUSG00000024042, ENSMUSG00000089774, ENSMUSG00000055980, ENSMUSG00000056529, ENSMUSG00000033849, ENSMUSG00000038894, ENSMUSG00000039037, ENSMUSG00000025789, ENSMUSG00000022346, ENSMUSG00000019139	199	495	19596	2.18827	1	0.22129	0.202222
GOTERM_BP_FAT	GO:0098657~import into cell	6	2.87081	0.0299081	ENSMUSG00000031980, ENSMUSG00000020733, ENSMUSG00000005360, ENSMUSG00000033161, ENSMUSG00000023992, ENSMUSG00000023243	199	171	19596	3.45517	1	0.222778	0.203582
GOTERM_BP_FAT	GO:0060748~tertiary branching involved in mammary gland duct morphogenesis	2	0.956938	0.0300086	ENSMUSG00000036856, ENSMUSG00000031870	199	3	19596	65.6482	1	0.222778	0.203582
GOTERM_BP_FAT	GO:0060359~response to ammonium ion	6	2.87081	0.0299081	ENSMUSG00000031870, ENSMUSG00000005360, ENSMUSG00000049112, ENSMUSG00000056529, ENSMUSG00000037820, ENSMUSG00000022346	199	171	19596	3.45517	1	0.222778	0.203582
GOTERM_BP_FAT	GO:0035801~adrenal cortex development	2	0.956938	0.0300086	ENSMUSG00000016458, ENSMUSG00000039910	199	3	19596	65.6482	1	0.222778	0.203582
GOTERM_BP_FAT	GO:0035284~brain segmentation	2	0.956938	0.0300086	ENSMUSG00000037868, ENSMUSG00000074622	199	3	19596	65.6482	1	0.222778	0.203582
GOTERM_BP_FAT	GO:0035283~central nervous system segmentation	2	0.956938	0.0300086	ENSMUSG00000037868, ENSMUSG00000074622	199	3	19596	65.6482	1	0.222778	0.203582
GOTERM_BP_FAT	GO:0015850~organic hydroxy compound transport	8	3.82775	0.0297714	ENSMUSG00000031980, ENSMUSG00000020733, ENSMUSG00000089774, ENSMUSG00000049112, ENSMUSG00000040249, ENSMUSG00000023992, ENSMUSG00000034652, ENSMUSG00000022346	199	293	19596	2.68867	1	0.222778	0.203582
GOTERM_BP_FAT	GO:0007160~cell-matrix adhesion	7	3.34928	0.0296738	ENSMUSG00000040152, ENSMUSG00000036856, ENSMUSG00000029860, ENSMUSG00000031980, ENSMUSG00000024713, ENSMUSG00000047793, ENSMUSG00000040249	199	230	19596	2.99698	1	0.222778	0.203582
GOTERM_BP_FAT	GO:0006865~amino acid transport	6	2.87081	0.0299081	ENSMUSG00000031980, ENSMUSG00000020733, ENSMUSG00000005360, ENSMUSG00000055254, ENSMUSG00000048387, ENSMUSG00000022346	199	171	19596	3.45517	1	0.222778	0.203582
GOTERM_BP_FAT	GO:1905477~positive regulation of protein localization to membrane	5	2.39234	0.0301815	ENSMUSG00000089774, ENSMUSG00000052397, ENSMUSG00000040249, ENSMUSG00000023992, ENSMUSG00000025885	199	116	19596	4.2445	1	0.223229	0.203995
GOTERM_BP_FAT	GO:0072677~eosinophil migration	3	1.43541	0.0302126	ENSMUSG00000035042, ENSMUSG00000009185, ENSMUSG00000034652	199	27	19596	10.9414	1	0.223229	0.203995
GOTERM_BP_FAT	GO:0060143~positive regulation of syncytium formation by plasma membrane fusion	3	1.43541	0.0302126	ENSMUSG00000030748, ENSMUSG00000009185, ENSMUSG00000023992	199	27	19596	10.9414	1	0.223229	0.203995
GOTERM_BP_FAT	GO:0070098~chemokine-mediated signaling pathway	4	1.91388	0.0303559	ENSMUSG00000035042, ENSMUSG00000009185, ENSMUSG00000023992, ENSMUSG00000056427	199	67	19596	5.87895	1	0.223935	0.204639
GOTERM_BP_FAT	GO:0051246~regulation of protein metabolic process	42	20.0957	0.0310254	ENSMUSG00000031451, ENSMUSG00000054675, ENSMUSG00000052397, ENSMUSG00000057322, ENSMUSG00000086962, ENSMUSG00000040249, ENSMUSG00000023992, ENSMUSG00000028967, ENSMUSG00000022346, ENSMUSG00000042842, ENSMUSG00000024621, ENSMUSG00000044786, ENSMUSG00000035692, ENSMUSG00000016458, ENSMUSG00000032726, ENSMUSG00000074345, ENSMUSG00000039533, ENSMUSG00000031980, ENSMUSG00000007892, ENSMUSG00000028871,…	199	3046	19596	1.35779	1	0.228154	0.208494
GOTERM_BP_FAT	GO:0015758~glucose transport	5	2.39234	0.0310114	ENSMUSG00000052397, ENSMUSG00000055980, ENSMUSG00000038894, ENSMUSG00000022346, ENSMUSG00000042985	199	117	19596	4.20822	1	0.228154	0.208494
GOTERM_BP_FAT	GO:0007610~behavior	15	7.17703	0.0313844	ENSMUSG00000037868, ENSMUSG00000031870, ENSMUSG00000031980, ENSMUSG00000005360, ENSMUSG00000026077, ENSMUSG00000048087, ENSMUSG00000055254, ENSMUSG00000049112, ENSMUSG00000021250, ENSMUSG00000023992, ENSMUSG00000027597, ENSMUSG00000022840, ENSMUSG00000040152, ENSMUSG00000019970, ENSMUSG00000030854	199	795	19596	1.85797	1	0.230432	0.210576
GOTERM_BP_FAT	GO:0010830~regulation of myotube differentiation	4	1.91388	0.0315273	ENSMUSG00000054675, ENSMUSG00000024042, ENSMUSG00000030748, ENSMUSG00000009185	199	68	19596	5.79249	1	0.230759	0.210875
GOTERM_BP_FAT	GO:0006909~phagocytosis	10	4.78469	0.0315277	ENSMUSG00000040152, ENSMUSG00000031451, ENSMUSG00000002602, ENSMUSG00000056870, ENSMUSG00000040249, ENSMUSG00000037379, ENSMUSG00000023992, ENSMUSG00000057729, ENSMUSG00000034652, ENSMUSG00000037820	199	431	19596	2.28474	1	0.230759	0.210875
GOTERM_BP_FAT	GO:0001501~skeletal system development	12	5.74163	0.0315909	ENSMUSG00000040152, ENSMUSG00000034612, ENSMUSG00000054675, ENSMUSG00000024713, ENSMUSG00000057322, ENSMUSG00000048387, ENSMUSG00000032726, ENSMUSG00000017737, ENSMUSG00000027004, ENSMUSG00000037820, ENSMUSG00000039910, ENSMUSG00000022346	199	573	19596	2.06225	1	0.23086	0.210968
GOTERM_BP_FAT	GO:0008645~hexose transport	5	2.39234	0.0318546	ENSMUSG00000052397, ENSMUSG00000055980, ENSMUSG00000038894, ENSMUSG00000022346, ENSMUSG00000042985	199	118	19596	4.17256	1	0.232424	0.212397
GOTERM_BP_FAT	GO:0042220~response to cocaine	4	1.91388	0.0327222	ENSMUSG00000031870, ENSMUSG00000005360, ENSMUSG00000049112, ENSMUSG00000037820	199	69	19596	5.70854	1	0.238254	0.217724
GOTERM_BP_FAT	GO:0001503~ossification	10	4.78469	0.0327554	ENSMUSG00000036856, ENSMUSG00000054675, ENSMUSG00000057322, ENSMUSG00000035692, ENSMUSG00000048387, ENSMUSG00000032726, ENSMUSG00000034320, ENSMUSG00000017737, ENSMUSG00000073489, ENSMUSG00000071637	199	434	19596	2.26895	1	0.238254	0.217724
GOTERM_BP_FAT	GO:0030217~T cell differentiation	8	3.82775	0.0330436	ENSMUSG00000036856, ENSMUSG00000036594, ENSMUSG00000030748, ENSMUSG00000037440, ENSMUSG00000074622, ENSMUSG00000041202, ENSMUSG00000024610, ENSMUSG00000021356	199	300	19596	2.62593	1	0.239977	0.219299
GOTERM_BP_FAT	GO:0055065~metal ion homeostasis	14	6.69856	0.0333318	ENSMUSG00000031980, ENSMUSG00000005360, ENSMUSG00000049112, ENSMUSG00000040249, ENSMUSG00000033161, ENSMUSG00000022346, ENSMUSG00000022840, ENSMUSG00000019970, ENSMUSG00000027716, ENSMUSG00000035042, ENSMUSG00000009185, ENSMUSG00000037820, ENSMUSG00000019787, ENSMUSG00000030730	199	726	19596	1.89892	1	0.24132	0.220527
GOTERM_BP_FAT	GO:0042063~gliogenesis	9	4.30622	0.0333061	ENSMUSG00000037868, ENSMUSG00000031980, ENSMUSG00000055254, ENSMUSG00000036098, ENSMUSG00000040249, ENSMUSG00000023992, ENSMUSG00000022346, ENSMUSG00000024621, ENSMUSG00000036887	199	367	19596	2.41485	1	0.24132	0.220527
GOTERM_BP_FAT	GO:0015749~monosaccharide transport	5	2.39234	0.0335813	ENSMUSG00000052397, ENSMUSG00000055980, ENSMUSG00000038894, ENSMUSG00000022346, ENSMUSG00000042985	199	120	19596	4.10302	1	0.24275	0.221834
GOTERM_BP_FAT	GO:1904377~positive regulation of protein localization to cell periphery	4	1.91388	0.0339405	ENSMUSG00000052397, ENSMUSG00000040249, ENSMUSG00000023992, ENSMUSG00000025885	199	70	19596	5.62699	1	0.244591	0.223515
GOTERM_BP_FAT	GO:0032720~negative regulation of tumor necrosis factor production	4	1.91388	0.0339405	ENSMUSG00000031451, ENSMUSG00000002602, ENSMUSG00000023992, ENSMUSG00000028967	199	70	19596	5.62699	1	0.244591	0.223515
GOTERM_BP_FAT	GO:1905939~regulation of gonad development	3	1.43541	0.0344918	ENSMUSG00000036856, ENSMUSG00000016458, ENSMUSG00000039910	199	29	19596	10.1868	1	0.247421	0.226101
GOTERM_BP_FAT	GO:0036120~cellular response to platelet-derived growth factor stimulus	3	1.43541	0.0344918	ENSMUSG00000033763, ENSMUSG00000028967, ENSMUSG00000022346	199	29	19596	10.1868	1	0.247421	0.226101
GOTERM_BP_FAT	GO:0018126~protein hydroxylation	3	1.43541	0.0344918	ENSMUSG00000032374, ENSMUSG00000051048, ENSMUSG00000006931	199	29	19596	10.1868	1	0.247421	0.226101
GOTERM_BP_FAT	GO:0009893~positive regulation of metabolic process	51	24.4019	0.0345464	ENSMUSG00000054675, ENSMUSG00000031870, ENSMUSG00000024621, ENSMUSG00000021356, ENSMUSG00000044786, ENSMUSG00000089774, ENSMUSG00000032726, ENSMUSG00000039910, ENSMUSG00000031980, ENSMUSG00000026077, ENSMUSG00000055254, ENSMUSG00000023046, ENSMUSG00000024610, ENSMUSG00000002602, ENSMUSG00000038894, ENSMUSG00000030854, ENSMUSG00000017737, ENSMUSG00000034652, ENSMUSG00000032359, ENSMUSG00000034009,…	199	3875	19596	1.29602	1	0.247432	0.226112
GOTERM_BP_FAT	GO:0055080~cation homeostasis	15	7.17703	0.0346339	ENSMUSG00000031980, ENSMUSG00000005360, ENSMUSG00000032373, ENSMUSG00000049112, ENSMUSG00000040249, ENSMUSG00000033161, ENSMUSG00000022346, ENSMUSG00000022840, ENSMUSG00000019970, ENSMUSG00000027716, ENSMUSG00000035042, ENSMUSG00000009185, ENSMUSG00000037820, ENSMUSG00000019787, ENSMUSG00000030730	199	806	19596	1.83261	1	0.24768	0.226338
GOTERM_BP_FAT	GO:2001242~regulation of intrinsic apoptotic signaling pathway	6	2.87081	0.035501	ENSMUSG00000020733, ENSMUSG00000037440, ENSMUSG00000017737, ENSMUSG00000023992, ENSMUSG00000022346, ENSMUSG00000024610	199	179	19596	3.30075	1	0.251193	0.229548
GOTERM_BP_FAT	GO:1902895~positive regulation of pri-miRNA transcription from RNA polymerase II promoter	4	1.91388	0.035182	ENSMUSG00000021250, ENSMUSG00000016458, ENSMUSG00000000120, ENSMUSG00000022346	199	71	19596	5.54774	1	0.251193	0.229548
GOTERM_BP_FAT	GO:0050920~regulation of chemotaxis	7	3.34928	0.0354259	ENSMUSG00000040152, ENSMUSG00000041120, ENSMUSG00000031451, ENSMUSG00000035042, ENSMUSG00000023992, ENSMUSG00000024621, ENSMUSG00000024610	199	240	19596	2.87211	1	0.251193	0.229548
GOTERM_BP_FAT	GO:0043279~response to alkaloid	6	2.87081	0.035501	ENSMUSG00000031870, ENSMUSG00000005360, ENSMUSG00000049112, ENSMUSG00000055980, ENSMUSG00000037820, ENSMUSG00000022346	199	179	19596	3.30075	1	0.251193	0.229548
GOTERM_BP_FAT	GO:0030879~mammary gland development	6	2.87081	0.035501	ENSMUSG00000036856, ENSMUSG00000020027, ENSMUSG00000034009, ENSMUSG00000031870, ENSMUSG00000055980, ENSMUSG00000038894	199	179	19596	3.30075	1	0.251193	0.229548
GOTERM_BP_FAT	GO:0007416~synapse assembly	6	2.87081	0.035501	ENSMUSG00000047414, ENSMUSG00000047787, ENSMUSG00000055254, ENSMUSG00000020704, ENSMUSG00000049112, ENSMUSG00000025789	199	179	19596	3.30075	1	0.251193	0.229548
GOTERM_BP_FAT	GO:0006956~complement activation	7	3.34928	0.0354259	ENSMUSG00000073418, ENSMUSG00000036905, ENSMUSG00000001128, ENSMUSG00000026938, ENSMUSG00000023992, ENSMUSG00000036896, ENSMUSG00000036887	199	240	19596	2.87211	1	0.251193	0.229548
GOTERM_BP_FAT	GO:0040013~negative regulation of locomotion	9	4.30622	0.0357477	ENSMUSG00000040152, ENSMUSG00000041120, ENSMUSG00000036856, ENSMUSG00000020733, ENSMUSG00000040249, ENSMUSG00000034652, ENSMUSG00000000120, ENSMUSG00000039910, ENSMUSG00000024610	199	372	19596	2.3824	1	0.252556	0.230794
GOTERM_BP_FAT	GO:1990776~response to angiotensin	3	1.43541	0.0367145	ENSMUSG00000015340, ENSMUSG00000031980, ENSMUSG00000022346	199	30	19596	9.84724	1	0.255147	0.233162
GOTERM_BP_FAT	GO:1903556~negative regulation of tumor necrosis factor superfamily cytokine production	4	1.91388	0.0364468	ENSMUSG00000031451, ENSMUSG00000002602, ENSMUSG00000023992, ENSMUSG00000028967	199	72	19596	5.47069	1	0.255147	0.233162
GOTERM_BP_FAT	GO:0072012~glomerulus vasculature development	3	1.43541	0.0367145	ENSMUSG00000048387, ENSMUSG00000016458, ENSMUSG00000045680	199	30	19596	9.84724	1	0.255147	0.233162
GOTERM_BP_FAT	GO:0060135~maternal process involved in female pregnancy	4	1.91388	0.0364468	ENSMUSG00000036856, ENSMUSG00000031870, ENSMUSG00000017969, ENSMUSG00000039910	199	72	19596	5.47069	1	0.255147	0.233162
GOTERM_BP_FAT	GO:0046324~regulation of glucose import	4	1.91388	0.0364468	ENSMUSG00000055980, ENSMUSG00000038894, ENSMUSG00000022346, ENSMUSG00000042985	199	72	19596	5.47069	1	0.255147	0.233162
GOTERM_BP_FAT	GO:0043603~cellular amide metabolic process	20	9.56938	0.0365676	ENSMUSG00000007892, ENSMUSG00000057322, ENSMUSG00000055254, ENSMUSG00000025789, ENSMUSG00000040152, ENSMUSG00000044786, ENSMUSG00000025934, ENSMUSG00000024713, ENSMUSG00000038156, ENSMUSG00000037440, ENSMUSG00000056529, ENSMUSG00000090733, ENSMUSG00000036596, ENSMUSG00000033849, ENSMUSG00000016458, ENSMUSG00000018339, ENSMUSG00000034892, ENSMUSG00000039037, ENSMUSG00000035202, ENSMUSG00000032359	199	1206	19596	1.63304	1	0.255147	0.233162
GOTERM_BP_FAT	GO:0043032~positive regulation of macrophage activation	3	1.43541	0.0367145	ENSMUSG00000040152, ENSMUSG00000030748, ENSMUSG00000023992	199	30	19596	9.84724	1	0.255147	0.233162
GOTERM_BP_FAT	GO:0030325~adrenal gland development	3	1.43541	0.0367145	ENSMUSG00000036856, ENSMUSG00000016458, ENSMUSG00000039910	199	30	19596	9.84724	1	0.255147	0.233162
GOTERM_BP_FAT	GO:0030072~peptide hormone secretion	8	3.82775	0.0364622	ENSMUSG00000031980, ENSMUSG00000031075, ENSMUSG00000035042, ENSMUSG00000055980, ENSMUSG00000032726, ENSMUSG00000040249, ENSMUSG00000038894, ENSMUSG00000022840	199	306	19596	2.57444	1	0.255147	0.233162
GOTERM_BP_FAT	GO:0021602~cranial nerve morphogenesis	3	1.43541	0.0367145	ENSMUSG00000037868, ENSMUSG00000074622, ENSMUSG00000039910	199	30	19596	9.84724	1	0.255147	0.233162
GOTERM_BP_FAT	GO:0006688~glycosphingolipid biosynthetic process	3	1.43541	0.0367145	ENSMUSG00000033849, ENSMUSG00000039037, ENSMUSG00000025789	199	30	19596	9.84724	1	0.255147	0.233162
GOTERM_BP_FAT	GO:0071496~cellular response to external stimulus	9	4.30622	0.0372295	ENSMUSG00000036856, ENSMUSG00000031451, ENSMUSG00000031980, ENSMUSG00000024042, ENSMUSG00000002602, ENSMUSG00000021250, ENSMUSG00000033161, ENSMUSG00000017737, ENSMUSG00000073489	199	375	19596	2.36334	1	0.257425	0.235244
GOTERM_BP_FAT	GO:0051384~response to glucocorticoid	6	2.87081	0.0372625	ENSMUSG00000044786, ENSMUSG00000019970, ENSMUSG00000056529, ENSMUSG00000021250, ENSMUSG00000028967, ENSMUSG00000056427	199	182	19596	3.24634	1	0.257425	0.235244
GOTERM_BP_FAT	GO:0017015~regulation of transforming growth factor beta receptor signaling pathway	5	2.39234	0.0371957	ENSMUSG00000040152, ENSMUSG00000034612, ENSMUSG00000040249, ENSMUSG00000006205, ENSMUSG00000039910	199	124	19596	3.97066	1	0.257425	0.235244
GOTERM_BP_FAT	GO:0003002~regionalization	9	4.30622	0.0372295	ENSMUSG00000041120, ENSMUSG00000037868, ENSMUSG00000024713, ENSMUSG00000048387, ENSMUSG00000016458, ENSMUSG00000043969, ENSMUSG00000074622, ENSMUSG00000039910, ENSMUSG00000035403	199	375	19596	2.36334	1	0.257425	0.235244
GOTERM_BP_FAT	GO:0006898~receptor-mediated endocytosis	8	3.82775	0.0374911	ENSMUSG00000020961, ENSMUSG00000028871, ENSMUSG00000052397, ENSMUSG00000040249, ENSMUSG00000030854, ENSMUSG00000027322, ENSMUSG00000034652, ENSMUSG00000018920	199	308	19596	2.55772	1	0.258622	0.236337
GOTERM_BP_FAT	GO:0034121~regulation of toll-like receptor signaling pathway	4	1.91388	0.0377347	ENSMUSG00000023992, ENSMUSG00000034652, ENSMUSG00000025017, ENSMUSG00000021356	199	73	19596	5.39575	1	0.25992	0.237523
[truncated: 469 more rows]

## Sheet: DEGs up (OS vs CS)
Category	Term	Count	%	PValue	Genes	List Total	Pop Hits	Pop Total	Fold Enrichment	Bonferroni	Benjamini	FDR
[truncated: 1,611 more rows]

[truncated: 15 more sheets: DEGs down (OS vs CS), DEGs up (OV vs OS), DEGs down (OV vs OS), DEGs up (AS vs CS), DEGs down (AS vs CS), DEGs up (AV vs AS), DEGs down (AV vs CV), DEGs down (AV vs AS), DEGs up (AV vs CV), DEGs up (CV vs CS), DEGs down (CV vs CS), DEGs up (OS vs AS), DEGs down (OS vs AS), DEGs up (OV vs AV), DEGs down (OV vs AV)]
