# Supplementary material for: Mechanic Insight into the Distinct and Common Roles of Ovariectomy Versus Adrenalectomy on Adipose Tissue Remodeling in Female Mice
Source: Int J Mol Sci. 2023 Jan 24;24(3):2308. doi: 10.3390/ijms24032308 (PMC9916485; doi:10.3390/ijms24032308)
Supplement: Supplementary file 1 [file ijms-24-02308-s001.zip › Tabel S4 Functional enrichment analysis of common DEGs using DAVID.xlsx]

## Sheet: OS vs CS & OV vs CV common DEGs
	Category	Term	Count	%	PValue	Genes	List Total	Pop Hits	Pop Total	Fold Enrichment	Bonferroni	Benjamini	FDR	Corresponding to figure S2C
Common up (Quadrant 1)	GOTERM_BP_FAT	GO:0045444~fat cell differentiation	7	10.7692	6.64462e-05	PER2, MRAP, ZBTB16, LRRC8C, ITGA6, PPARG, LPIN1	56	253	20010	9.88636	0.135142	0.145119	0.145119
	GOTERM_BP_FAT	GO:0046942~carboxylic acid transport	7	10.7692	0.000496486	PER2, FABP5, SLC1A1, ADORA1, LRRC8C, SLC16A12, PPARG	56	367	20010	6.8154	0.662129	0.28907	0.28907
	GOTERM_BP_FAT	GO:0015849~organic acid transport	7	10.7692	0.000518242	PER2, FABP5, SLC1A1, ADORA1, LRRC8C, SLC16A12, PPARG	56	370	20010	6.76014	0.677822	0.28907	0.28907
	GOTERM_BP_FAT	GO:0010942~positive regulation of cell death	9	13.8462	0.00102884	ACER2, ZBTB16, SLC1A1, ADORA1, ITGA6, PPARG, MT-CO2, SOX7, OPTN	56	758	20010	4.2426	0.894513	0.28907	0.28907
	GOTERM_BP_FAT	GO:0010646~regulation of cell communication	21	32.3077	0.00119958	CLSTN2, HFE, SLC1A1, OTOP1, KLF15, ARHGAP24, APLN, PER2, RGS5, TCIM, SYT12, FABP5, MCF2L, MFNG, ADORA1, PPARG, ITGA6, CSPG4, KMT5A, SOX7, OPTN	56	3670	20010	2.04462	0.92739	0.28907	0.28907
	GOTERM_BP_FAT	GO:0006865~amino acid transport	5	7.69231	0.00127778	PER2, SLC1A1, ADORA1, LRRC8C, SLC16A12	56	172	20010	10.3873	0.938808	0.28907	0.28907
	GOTERM_BP_FAT	GO:0023051~regulation of signaling	21	32.3077	0.00130403	CLSTN2, HFE, SLC1A1, OTOP1, KLF15, ARHGAP24, APLN, PER2, RGS5, TCIM, SYT12, FABP5, MCF2L, MFNG, ADORA1, PPARG, ITGA6, CSPG4, KMT5A, SOX7, OPTN	56	3694	20010	2.03133	0.942224	0.28907	0.28907
	GOTERM_BP_FAT	GO:0044057~regulation of system process	8	12.3077	0.00145269	PER2, FABP5, SLC1A1, ADORA1, ABCC9, PPARG, LPIN1, APLN	56	618	20010	4.62552	0.958266	0.28907	0.28907
	GOTERM_BP_FAT	GO:0015980~energy derivation by oxidation of organic compounds	6	9.23077	0.00148517	PER2, PPP1R3D, GPD1, MT-CO2, MT-CO3, IDH3A	56	305	20010	7.02927	0.961129	0.28907	0.28907
	GOTERM_BP_FAT	GO:0014074~response to purine-containing compound	5	7.69231	0.00157282	MAT2A, GPD1, ADORA1, ABCC9, PPARG	56	182	20010	9.81652	0.967913	0.28907	0.28907
	GOTERM_BP_FAT	GO:0006796~phosphate-containing compound metabolic process	19	29.2308	0.00178983	PANK3, HFE, SLC1A1, VLDLR, APLN, LDHB, TCIM, FABP5, MKNK2, GPD1, ADORA1, PPARG, MT-CO2, ITGA6, CSPG4, MT-CO3, LPIN1, GM10925, IDH3A	56	3225	20010	2.10515	0.980045	0.28907	0.28907
	GOTERM_BP_FAT	GO:0006835~dicarboxylic acid transport	4	6.15385	0.00194935	PER2, SLC1A1, ADORA1, LRRC8C	56	90	20010	15.881	0.985927	0.28907	0.28907
	GOTERM_BP_FAT	GO:1901566~organonitrogen compound biosynthetic process	12	18.4615	0.00197984	PER2, ACER2, MT-TP, PANK3, FABP5, MT-RNR2, SLC1A1, PPARG, MT-CO2, CPEB2, HACD2, GM10925	56	1476	20010	2.90505	0.986836	0.28907	0.28907
	GOTERM_BP_FAT	GO:0010562~positive regulation of phosphorus metabolic process	11	16.9231	0.00198537	TCIM, HFE, GPD1, SLC1A1, ADORA1, ITGA6, PPARG, CSPG4, MT-CO2, VLDLR, APLN	56	1254	20010	3.1344	0.986994	0.28907	0.28907
	GOTERM_BP_FAT	GO:0045937~positive regulation of phosphate metabolic process	11	16.9231	0.00198537	TCIM, HFE, GPD1, SLC1A1, ADORA1, ITGA6, PPARG, CSPG4, MT-CO2, VLDLR, APLN	56	1254	20010	3.1344	0.986994	0.28907	0.28907
	GOTERM_BP_FAT	GO:0015711~organic anion transport	7	10.7692	0.00224089	PER2, FABP5, SLC1A1, ADORA1, LRRC8C, SLC16A12, PPARG	56	492	20010	5.08384	0.992567	0.305882	0.305882
	GOTERM_BP_FAT	GO:0006793~phosphorus metabolic process	19	29.2308	0.00240374	PANK3, HFE, SLC1A1, VLDLR, APLN, LDHB, TCIM, FABP5, MKNK2, GPD1, ADORA1, PPARG, MT-CO2, ITGA6, CSPG4, MT-CO3, LPIN1, GM10925, IDH3A	56	3309	20010	2.05171	0.994797	0.30881	0.30881
	GOTERM_BP_FAT	GO:0055114~oxidation-reduction process	7	10.7692	0.00281283	PER2, PPP1R3D, GPD1, PPARG, MT-CO2, MT-CO3, IDH3A	56	515	20010	4.8568	0.997877	0.319362	0.319362
	GOTERM_BP_FAT	GO:0031325~positive regulation of cellular metabolic process	20	30.7692	0.00282207	HLF, HFE, ZBTB16, SLC1A1, NR1D2, VLDLR, KLF15, APLN, ACER2, TCIM, MCF2L, GPD1, ADORA1, PPARG, MT-CO2, ITGA6, CSPG4, LPIN1, SOX7, OPTN	56	3640	20010	1.9633	0.997919	0.319362	0.319362
	GOTERM_BP_FAT	GO:0010243~response to organonitrogen compound	10	15.3846	0.00292456	MAT2A, GPD1, SLC1A1, ADORA1, ABCC9, PPARG, OTOP1, LPIN1, CPEB2, KLF15	56	1103	20010	3.23954	0.998338	0.319362	0.319362
	GOTERM_BP_FAT	GO:0009628~response to abiotic stimulus	11	16.9231	0.00371729	PER2, TCIM, SLC1A1, ADORA1, LRRC8C, PPARG, MT-CO2, OTOP1, VLDLR, CPEB2, GM10925	56	1367	20010	2.8753	0.999708	0.373489	0.373489
	GOTERM_BP_FAT	GO:0042327~positive regulation of phosphorylation	10	15.3846	0.00390425	TCIM, HFE, GPD1, SLC1A1, ADORA1, ITGA6, PPARG, CSPG4, VLDLR, APLN	56	1152	20010	3.10175	0.999806	0.373489	0.373489
	GOTERM_BP_FAT	GO:1904706~negative regulation of vascular smooth muscle cell proliferation	3	4.61538	0.00393327	RGS5, PPARG, APLN	56	34	20010	31.5284	0.999818	0.373489	0.373489
	GOTERM_BP_FAT	GO:0009719~response to endogenous stimulus	13	20	0.00479941	HFE, SLC1A1, ABCC9, NR1D2, OTOP1, KLF15, APLN, MAT2A, GPD1, ADORA1, PPARG, LPIN1, CPEB2	56	1901	20010	2.44354	0.999973	0.436746	0.436746
	GOTERM_BP_FAT	GO:0015800~acidic amino acid transport	3	4.61538	0.00514985	PER2, SLC1A1, LRRC8C	56	39	20010	27.4863	0.999987	0.440819	0.440819
	GOTERM_BP_FAT	GO:0048511~rhythmic process	6	9.23077	0.00551035	PER2, HLF, MAT2A, ADORA1, NR1D2, PPARG	56	414	20010	5.17857	0.999994	0.440819	0.440819
	GOTERM_BP_FAT	GO:0008285~negative regulation of cell proliferation	8	12.3077	0.00568049	PER2, RGS5, ZBTB16, ADORA1, PPARG, SOX7, OPTN, APLN	56	790	20010	3.61844	0.999996	0.440819	0.440819
	GOTERM_BP_FAT	GO:0043280~positive regulation of cysteine-type endopeptidase activity involved in apoptotic process	4	6.15385	0.00585336	ACER2, SLC1A1, PPARG, SOX7	56	133	20010	10.7465	0.999997	0.440819	0.440819
	GOTERM_BP_FAT	GO:0042752~regulation of circadian rhythm	4	6.15385	0.00585336	PER2, ADORA1, NR1D2, PPARG	56	133	20010	10.7465	0.999997	0.440819	0.440819
	GOTERM_BP_FAT	GO:0019318~hexose metabolic process	5	7.69231	0.00636494	PER2, FABP5, PPP1R3D, GPD1, ALDH1A7	56	269	20010	6.64166	0.999999	0.441204	0.441204
	GOTERM_BP_FAT	GO:0006091~generation of precursor metabolites and energy	6	9.23077	0.00676573	PER2, PPP1R3D, GPD1, MT-CO2, MT-CO3, IDH3A	56	435	20010	4.92857	1	0.441204	0.441204
	GOTERM_BP_FAT	GO:1903522~regulation of blood circulation	5	7.69231	0.00678567	PER2, SLC1A1, ADORA1, ABCC9, APLN	56	274	20010	6.52046	1	0.441204	0.441204
	GOTERM_BP_FAT	GO:0009893~positive regulation of metabolic process	20	30.7692	0.00684689	HLF, HFE, ZBTB16, SLC1A1, NR1D2, VLDLR, KLF15, APLN, ACER2, TCIM, MCF2L, GPD1, ADORA1, PPARG, MT-CO2, ITGA6, CSPG4, LPIN1, SOX7, OPTN	56	3934	20010	1.81658	1	0.441204	0.441204
	GOTERM_BP_FAT	GO:0006811~ion transport	12	18.4615	0.00715251	PER2, FABP5, SYT12, HFE, SLC1A1, ADORA1, LRRC8C, SLC16A12, ABCC9, PPARG, OTOP1, GM10925	56	1746	20010	2.45582	1	0.441204	0.441204
	GOTERM_BP_FAT	GO:0009966~regulation of signal transduction	17	26.1538	0.00750647	HFE, OTOP1, KLF15, ARHGAP24, APLN, RGS5, TCIM, FABP5, MCF2L, MFNG, ADORA1, PPARG, ITGA6, CSPG4, KMT5A, SOX7, OPTN	56	3095	20010	1.96267	1	0.441204	0.441204
	GOTERM_BP_FAT	GO:1901698~response to nitrogen compound	10	15.3846	0.00759561	MAT2A, GPD1, SLC1A1, ADORA1, ABCC9, PPARG, OTOP1, LPIN1, CPEB2, KLF15	56	1277	20010	2.79813	1	0.441204	0.441204
	GOTERM_BP_FAT	GO:0006820~anion transport	7	10.7692	0.00761824	PER2, FABP5, SLC1A1, ADORA1, LRRC8C, SLC16A12, PPARG	56	633	20010	3.95142	1	0.441204	0.441204
	GOTERM_BP_FAT	GO:0070482~response to oxygen levels	6	9.23077	0.0079198	SLC1A1, ADORA1, PPARG, VLDLR, CPEB2, GM10925	56	452	20010	4.7432	1	0.441204	0.441204
	GOTERM_BP_FAT	GO:0005975~carbohydrate metabolic process	7	10.7692	0.00802177	PER2, LDHB, FABP5, PPP1R3D, GPD1, LCTL, ALDH1A7	56	640	20010	3.9082	1	0.441204	0.441204
	GOTERM_BP_FAT	GO:0009117~nucleotide metabolic process	7	10.7692	0.00808066	LDHB, PANK3, GPD1, MT-CO2, MT-CO3, GM10925, IDH3A	56	641	20010	3.90211	1	0.441204	0.441204
	GOTERM_BP_FAT	GO:0031529~ruffle organization	3	4.61538	0.00835093	CSPG4, LPIN1, ARHGAP24	56	50	20010	21.4393	1	0.442087	0.442087
	GOTERM_BP_FAT	GO:0006753~nucleoside phosphate metabolic process	7	10.7692	0.00850168	LDHB, PANK3, GPD1, MT-CO2, MT-CO3, GM10925, IDH3A	56	648	20010	3.85995	1	0.442087	0.442087
	GOTERM_BP_FAT	GO:2001056~positive regulation of cysteine-type endopeptidase activity	4	6.15385	0.00890965	ACER2, SLC1A1, PPARG, SOX7	56	155	20010	9.2212	1	0.444693	0.444693
	GOTERM_BP_FAT	GO:0032868~response to insulin	5	7.69231	0.00895902	PPARG, OTOP1, LPIN1, CPEB2, KLF15	56	297	20010	6.01551	1	0.444693	0.444693
	GOTERM_BP_FAT	GO:0019637~organophosphate metabolic process	9	13.8462	0.0100881	LDHB, PANK3, FABP5, GPD1, MT-CO2, MT-CO3, LPIN1, GM10925, IDH3A	56	1103	20010	2.91559	1	0.471242	0.471242
	GOTERM_BP_FAT	GO:0005996~monosaccharide metabolic process	5	7.69231	0.0101426	PER2, FABP5, PPP1R3D, GPD1, ALDH1A7	56	308	20010	5.80067	1	0.471242	0.471242
	GOTERM_BP_FAT	GO:0043065~positive regulation of apoptotic process	7	10.7692	0.0107025	ACER2, ZBTB16, SLC1A1, ITGA6, PPARG, SOX7, OPTN	56	681	20010	3.67291	1	0.471242	0.471242
	GOTERM_BP_FAT	GO:0050873~brown fat cell differentiation	3	4.61538	0.0107475	MRAP, ITGA6, PPARG	56	57	20010	18.8064	1	0.471242	0.471242
	GOTERM_BP_FAT	GO:0055086~nucleobase-containing small molecule metabolic process	7	10.7692	0.0107749	LDHB, PANK3, GPD1, MT-CO2, MT-CO3, GM10925, IDH3A	56	682	20010	3.66752	1	0.471242	0.471242
	GOTERM_BP_FAT	GO:0043068~positive regulation of programmed cell death	7	10.7692	0.0110683	ACER2, ZBTB16, SLC1A1, ITGA6, PPARG, SOX7, OPTN	56	686	20010	3.64614	1	0.471242	0.471242
	GOTERM_BP_FAT	GO:0016310~phosphorylation	14	21.5385	0.0113732	PANK3, HFE, SLC1A1, VLDLR, APLN, TCIM, MKNK2, GPD1, ADORA1, PPARG, MT-CO2, ITGA6, CSPG4, MT-CO3	56	2392	20010	2.09135	1	0.471242	0.471242
	GOTERM_BP_FAT	GO:0010950~positive regulation of endopeptidase activity	4	6.15385	0.0114405	ACER2, SLC1A1, PPARG, SOX7	56	170	20010	8.40756	1	0.471242	0.471242
	GOTERM_BP_FAT	GO:0044093~positive regulation of molecular function	11	16.9231	0.0116587	ACER2, TCIM, HFE, MFNG, SLC1A1, ADORA1, ITGA6, PPARG, VLDLR, SOX7, ARHGAP24	56	1614	20010	2.43528	1	0.471242	0.471242
	GOTERM_BP_FAT	GO:0019220~regulation of phosphate metabolic process	12	18.4615	0.0118602	TCIM, HFE, GPD1, SLC1A1, ADORA1, ITGA6, PPARG, CSPG4, MT-CO2, VLDLR, LPIN1, APLN	56	1873	20010	2.2893	1	0.471242	0.471242
	GOTERM_BP_FAT	GO:0051174~regulation of phosphorus metabolic process	12	18.4615	0.0120854	TCIM, HFE, GPD1, SLC1A1, ADORA1, ITGA6, PPARG, CSPG4, MT-CO2, VLDLR, LPIN1, APLN	56	1878	20010	2.2832	1	0.471242	0.471242
	GOTERM_BP_FAT	GO:0046883~regulation of hormone secretion	5	7.69231	0.0121647	PER2, HFE, ADORA1, PPARG, APLN	56	325	20010	5.49725	1	0.471242	0.471242
	GOTERM_BP_FAT	GO:0032787~monocarboxylic acid metabolic process	7	10.7692	0.0122989	PER2, LDHB, FABP5, GPD1, PPARG, LPIN1, HACD2	56	702	20010	3.56303	1	0.471242	0.471242
	GOTERM_BP_FAT	GO:0071417~cellular response to organonitrogen compound	7	10.7692	0.0130323	GPD1, SLC1A1, PPARG, OTOP1, LPIN1, CPEB2, KLF15	56	711	20010	3.51793	1	0.48847	0.48847
	GOTERM_BP_FAT	GO:0019674~NAD metabolic process	3	4.61538	0.0134107	LDHB, GPD1, IDH3A	56	64	20010	16.7494	1	0.48847	0.48847
	GOTERM_BP_FAT	GO:0010604~positive regulation of macromolecule metabolic process	18	27.6923	0.0134195	HLF, HFE, ZBTB16, SLC1A1, NR1D2, VLDLR, KLF15, APLN, ACER2, TCIM, MCF2L, ADORA1, PPARG, ITGA6, CSPG4, LPIN1, SOX7, OPTN	56	3586	20010	1.79358	1	0.48847	0.48847
	GOTERM_BP_FAT	GO:0065009~regulation of molecular function	15	23.0769	0.0138751	HFE, SLC1A1, ABCC9, VLDLR, ARHGAP24, PER2, ACER2, TCIM, MFNG, ADORA1, PPARG, ITGA6, LPIN1, CPEB2, SOX7	56	2731	20010	1.96259	1	0.496028	0.496028
	GOTERM_BP_FAT	GO:0098657~import into cell	4	6.15385	0.0143465	PER2, HFE, SLC1A1, ABCC9	56	185	20010	7.72587	1	0.496028	0.496028
	GOTERM_BP_FAT	GO:2000273~positive regulation of receptor activity	3	4.61538	0.014631	HFE, ADORA1, PPARG	56	67	20010	15.9995	1	0.496028	0.496028
	GOTERM_BP_FAT	GO:0045776~negative regulation of blood pressure	3	4.61538	0.014631	ADORA1, ABCC9, APLN	56	67	20010	15.9995	1	0.496028	0.496028
	GOTERM_BP_FAT	GO:0010952~positive regulation of peptidase activity	4	6.15385	0.0147627	ACER2, SLC1A1, PPARG, SOX7	56	187	20010	7.64324	1	0.496028	0.496028
	GOTERM_BP_FAT	GO:1901615~organic hydroxy compound metabolic process	6	9.23077	0.015563	PER2, ACER2, LDHB, SLC1A1, VLDLR, ALDH1A7	56	535	20010	4.00734	1	0.500625	0.500625
	GOTERM_BP_FAT	GO:0071495~cellular response to endogenous stimulus	10	15.3846	0.0163673	HFE, GPD1, SLC1A1, NR1D2, PPARG, OTOP1, LPIN1, CPEB2, KLF15, APLN	56	1447	20010	2.46939	1	0.500625	0.500625
	GOTERM_BP_FAT	GO:0060336~negative regulation of interferon-gamma-mediated signaling pathway	2	3.07692	0.0163809	PPARG, OTOP1	56	6	20010	119.107	1	0.500625	0.500625
	GOTERM_BP_FAT	GO:0019249~lactate biosynthetic process	2	3.07692	0.0163809	PER2, LDHB	56	6	20010	119.107	1	0.500625	0.500625
	GOTERM_BP_FAT	GO:0060331~negative regulation of response to interferon-gamma	2	3.07692	0.0163809	PPARG, OTOP1	56	6	20010	119.107	1	0.500625	0.500625
	GOTERM_BP_FAT	GO:0008015~blood circulation	6	9.23077	0.016612	PER2, SLC1A1, ADORA1, ABCC9, PPARG, APLN	56	544	20010	3.94105	1	0.500625	0.500625
	GOTERM_BP_FAT	GO:0043085~positive regulation of catalytic activity	9	13.8462	0.0167581	ACER2, TCIM, SLC1A1, ADORA1, ITGA6, PPARG, VLDLR, SOX7, ARHGAP24	56	1208	20010	2.66216	1	0.500625	0.500625
	GOTERM_BP_FAT	GO:0044283~small molecule biosynthetic process	6	9.23077	0.0174599	PER2, ACER2, LDHB, FABP5, GPD1, HACD2	56	551	20010	3.89098	1	0.500625	0.500625
	GOTERM_BP_FAT	GO:0023061~signal release	6	9.23077	0.0174599	PER2, SYT12, HFE, ADORA1, PPARG, APLN	56	551	20010	3.89098	1	0.500625	0.500625
	GOTERM_BP_FAT	GO:0048662~negative regulation of smooth muscle cell proliferation	3	4.61538	0.0176565	RGS5, PPARG, APLN	56	74	20010	14.486	1	0.500625	0.500625
	GOTERM_BP_FAT	GO:0009266~response to temperature stimulus	4	6.15385	0.0178681	TCIM, ADORA1, PPARG, MT-CO2	56	201	20010	7.11087	1	0.500625	0.500625
	GOTERM_BP_FAT	GO:0003013~circulatory system process	6	9.23077	0.018083	PER2, SLC1A1, ADORA1, ABCC9, PPARG, APLN	56	556	20010	3.85599	1	0.500625	0.500625
	GOTERM_BP_FAT	GO:0008016~regulation of heart contraction	4	6.15385	0.0181028	SLC1A1, ADORA1, ABCC9, APLN	56	202	20010	7.07567	1	0.500625	0.500625
	GOTERM_BP_FAT	GO:1904705~regulation of vascular smooth muscle cell proliferation	3	4.61538	0.0181087	RGS5, PPARG, APLN	56	75	20010	14.2929	1	0.500625	0.500625
	GOTERM_BP_FAT	GO:0006732~coenzyme metabolic process	5	7.69231	0.0183852	LDHB, PANK3, MAT2A, GPD1, IDH3A	56	368	20010	4.85491	1	0.501915	0.501915
	GOTERM_BP_FAT	GO:0002791~regulation of peptide secretion	5	7.69231	0.0190479	PER2, HFE, ADORA1, PPARG, APLN	56	372	20010	4.80271	1	0.506153	0.506153
	GOTERM_BP_FAT	GO:0019752~carboxylic acid metabolic process	8	12.3077	0.0193979	PER2, LDHB, FABP5, GPD1, PPARG, LPIN1, HACD2, IDH3A	56	1003	20010	2.85002	1	0.506153	0.506153
	GOTERM_BP_FAT	GO:1990874~vascular smooth muscle cell proliferation	3	4.61538	0.0194943	RGS5, PPARG, APLN	56	78	20010	13.7431	1	0.506153	0.506153
	GOTERM_BP_FAT	GO:0002793~positive regulation of peptide secretion	4	6.15385	0.019794	HFE, ADORA1, PPARG, APLN	56	209	20010	6.83869	1	0.506153	0.506153
	GOTERM_BP_FAT	GO:0048260~positive regulation of receptor-mediated endocytosis	3	4.61538	0.0199659	HFE, PPARG, APLN	56	79	20010	13.5692	1	0.506153	0.506153
	GOTERM_BP_FAT	GO:0050807~regulation of synapse organization	4	6.15385	0.0200425	TUBA1A, CLSTN2, NCAN, LRTM1	56	210	20010	6.80612	1	0.506153	0.506153
	GOTERM_BP_FAT	GO:1901653~cellular response to peptide	5	7.69231	0.0202433	PPARG, OTOP1, LPIN1, CPEB2, KLF15	56	379	20010	4.714	1	0.506153	0.506153
	GOTERM_BP_FAT	GO:0006629~lipid metabolic process	10	15.3846	0.0203945	PER2, ACER2, FABP5, GPD1, ADORA1, NR1D2, PPARG, VLDLR, LPIN1, HACD2	56	1502	20010	2.37897	1	0.506153	0.506153
	GOTERM_BP_FAT	GO:0036293~response to decreased oxygen levels	5	7.69231	0.0207695	SLC1A1, ADORA1, PPARG, VLDLR, CPEB2	56	382	20010	4.67698	1	0.507737	0.507737
	GOTERM_BP_FAT	GO:0006919~activation of cysteine-type endopeptidase activity involved in apoptotic process	3	4.61538	0.0209232	ACER2, SLC1A1, PPARG	56	81	20010	13.2341	1	0.507737	0.507737
	GOTERM_BP_FAT	GO:0045333~cellular respiration	4	6.15385	0.0213111	GPD1, MT-CO2, MT-CO3, IDH3A	56	215	20010	6.64784	1	0.509067	0.509067
	GOTERM_BP_FAT	GO:0048585~negative regulation of response to stimulus	11	16.9231	0.0214919	RGS5, TCIM, HFE, ADORA1, ITGA6, NR1D2, PPARG, OTOP1, OPTN, ARHGAP24, APLN	56	1775	20010	2.21439	1	0.509067	0.509067
	GOTERM_BP_FAT	GO:0045935~positive regulation of nucleobase-containing compound metabolic process	12	18.4615	0.0220537	HLF, MCF2L, ZBTB16, GPD1, ITGA6, NR1D2, PPARG, MT-CO2, LPIN1, KLF15, SOX7, APLN	56	2050	20010	2.09164	1	0.509067	0.509067
	GOTERM_BP_FAT	GO:0071248~cellular response to metal ion	4	6.15385	0.022093	SYT12, HFE, SLC1A1, PPARG	56	218	20010	6.55636	1	0.509067	0.509067
	GOTERM_BP_FAT	GO:0043281~regulation of cysteine-type endopeptidase activity involved in apoptotic process	4	6.15385	0.0223571	ACER2, SLC1A1, PPARG, SOX7	56	219	20010	6.52642	1	0.509067	0.509067
	GOTERM_BP_FAT	GO:0010647~positive regulation of cell communication	12	18.4615	0.0224876	FABP5, CLSTN2, TCIM, SYT12, HFE, MCF2L, MFNG, SLC1A1, ADORA1, PPARG, CSPG4, APLN	56	2056	20010	2.08553	1	0.509067	0.509067
	GOTERM_BP_FAT	GO:0072330~monocarboxylic acid biosynthetic process	4	6.15385	0.022623	PER2, LDHB, FABP5, HACD2	56	220	20010	6.49675	1	0.509067	0.509067
	GOTERM_BP_FAT	GO:0046879~hormone secretion	5	7.69231	0.0229588	PER2, HFE, ADORA1, PPARG, APLN	56	394	20010	4.53454	1	0.509067	0.509067
	GOTERM_BP_FAT	GO:0023056~positive regulation of signaling	12	18.4615	0.0230758	FABP5, CLSTN2, TCIM, SYT12, HFE, MCF2L, MFNG, SLC1A1, ADORA1, PPARG, CSPG4, APLN	56	2064	20010	2.07745	1	0.509067	0.509067
	GOTERM_BP_FAT	GO:0050803~regulation of synapse structure or activity	4	6.15385	0.0239782	TUBA1A, CLSTN2, NCAN, LRTM1	56	225	20010	6.35238	1	0.519702	0.519702
	GOTERM_BP_FAT	GO:0007623~circadian rhythm	4	6.15385	0.0242545	PER2, MAT2A, ADORA1, NR1D2	56	226	20010	6.32427	1	0.519702	0.519702
	GOTERM_BP_FAT	GO:0034214~protein hexamerization	2	3.07692	0.0244722	MAT2A, LRRC8C	56	9	20010	79.4048	1	0.519702	0.519702
	GOTERM_BP_FAT	GO:0009914~hormone transport	5	7.69231	0.0250854	PER2, HFE, ADORA1, PPARG, APLN	56	405	20010	4.41138	1	0.519702	0.519702
	GOTERM_BP_FAT	GO:0032869~cellular response to insulin stimulus	4	6.15385	0.0250936	PPARG, OTOP1, LPIN1, CPEB2	56	229	20010	6.24142	1	0.519702	0.519702
	GOTERM_BP_FAT	GO:0060047~heart contraction	4	6.15385	0.0253768	SLC1A1, ADORA1, ABCC9, APLN	56	230	20010	6.21429	1	0.519702	0.519702
	GOTERM_BP_FAT	GO:0070887~cellular response to chemical stimulus	17	26.1538	0.0253994	HFE, SLC1A1, NR1D2, OTOP1, VLDLR, KLF15, APLN, ACER2, SYT12, MAT2A, MKNK2, GPD1, PPARG, ITGA6, LPIN1, CPEB2, OPTN	56	3537	20010	1.71741	1	0.519702	0.519702
	GOTERM_BP_FAT	GO:0031100~animal organ regeneration	3	4.61538	0.0254616	HFE, PPARG, LPIN1	56	90	20010	11.9107	1	0.519702	0.519702
	GOTERM_BP_FAT	GO:0008217~regulation of blood pressure	4	6.15385	0.0259484	ADORA1, ABCC9, PPARG, APLN	56	232	20010	6.16071	1	0.51992	0.51992
	GOTERM_BP_FAT	GO:0006006~glucose metabolic process	4	6.15385	0.0259484	PER2, FABP5, PPP1R3D, GPD1	56	232	20010	6.16071	1	0.51992	0.51992
	GOTERM_BP_FAT	GO:0051345~positive regulation of hydrolase activity	6	9.23077	0.0267375	ACER2, SLC1A1, ITGA6, PPARG, SOX7, ARHGAP24	56	616	20010	3.4804	1	0.53086	0.53086
	GOTERM_BP_FAT	GO:0019216~regulation of lipid metabolic process	5	7.69231	0.0273281	FABP5, ADORA1, NR1D2, PPARG, LPIN1	56	416	20010	4.29473	1	0.5377	0.5377
	GOTERM_BP_FAT	GO:1901699~cellular response to nitrogen compound	7	10.7692	0.028434	GPD1, SLC1A1, PPARG, OTOP1, LPIN1, CPEB2, KLF15	56	849	20010	2.94611	1	0.550135	0.550135
	GOTERM_BP_FAT	GO:0003015~heart process	4	6.15385	0.0286062	SLC1A1, ADORA1, ABCC9, APLN	56	241	20010	5.93065	1	0.550135	0.550135
	GOTERM_BP_FAT	GO:0006366~transcription from RNA polymerase II promoter	12	18.4615	0.0287238	PER2, HLF, HFE, MCF2L, ZBTB16, ITGA6, NR1D2, PPARG, KMT5A, LPIN1, KLF15, APLN	56	2134	20010	2.00931	1	0.550135	0.550135
	GOTERM_BP_FAT	GO:0043436~oxoacid metabolic process	8	12.3077	0.0289677	PER2, LDHB, FABP5, GPD1, PPARG, LPIN1, HACD2, IDH3A	56	1090	20010	2.62254	1	0.550135	0.550135
	GOTERM_BP_FAT	GO:0051336~regulation of hydrolase activity	8	12.3077	0.030114	ACER2, SLC1A1, ITGA6, PPARG, LPIN1, CPEB2, SOX7, ARHGAP24	56	1099	20010	2.60107	1	0.562797	0.562797
	GOTERM_BP_FAT	GO:0051128~regulation of cellular component organization	15	23.0769	0.0301498	CLSTN2, NCAN, HFE, LRTM1, VLDLR, ARHGAP24, APLN, PER2, MRAP, TUBA1A, PPARG, ITGA6, CSPG4, LPIN1, OPTN	56	3010	20010	1.78067	1	0.562797	0.562797
	GOTERM_BP_FAT	GO:0006082~organic acid metabolic process	8	12.3077	0.0314236	PER2, LDHB, FABP5, GPD1, PPARG, LPIN1, HACD2, IDH3A	56	1109	20010	2.57761	1	0.581602	0.581602
	GOTERM_BP_FAT	GO:2000116~regulation of cysteine-type endopeptidase activity	4	6.15385	0.0317233	ACER2, SLC1A1, PPARG, SOX7	56	251	20010	5.69437	1	0.582215	0.582215
	GOTERM_BP_FAT	GO:0090276~regulation of peptide hormone secretion	4	6.15385	0.0330183	PER2, HFE, PPARG, APLN	56	255	20010	5.60504	1	0.600933	0.600933
	GOTERM_BP_FAT	GO:0031348~negative regulation of defense response	4	6.15385	0.0336761	ADORA1, NR1D2, PPARG, OTOP1	56	257	20010	5.56142	1	0.60784	0.60784
	GOTERM_BP_FAT	GO:0022904~respiratory electron transport chain	3	4.61538	0.0344103	GPD1, MT-CO2, MT-CO3	56	106	20010	10.1129	1	0.616	0.616
	GOTERM_BP_FAT	GO:0051960~regulation of nervous system development	8	12.3077	0.0360192	PER2, CLSTN2, LRTM1, ITGA6, PPARG, CSPG4, VLDLR, LPIN1	56	1142	20010	2.50313	1	0.638122	0.638122
	GOTERM_BP_FAT	GO:0051186~cofactor metabolic process	5	7.69231	0.0362304	LDHB, PANK3, MAT2A, GPD1, IDH3A	56	455	20010	3.92661	1	0.638122	0.638122
	GOTERM_BP_FAT	GO:0090087~regulation of peptide transport	6	9.23077	0.0374916	PER2, HFE, SLC1A1, ADORA1, PPARG, APLN	56	675	20010	3.17619	1	0.640089	0.640089
	GOTERM_BP_FAT	GO:0010628~positive regulation of gene expression	12	18.4615	0.0376112	HLF, HFE, MCF2L, ZBTB16, ITGA6, NR1D2, PPARG, LPIN1, KLF15, SOX7, OPTN, APLN	56	2226	20010	1.92626	1	0.640089	0.640089
	GOTERM_BP_FAT	GO:0051173~positive regulation of nitrogen compound metabolic process	12	18.4615	0.0377175	HLF, MCF2L, ZBTB16, GPD1, ITGA6, NR1D2, PPARG, MT-CO2, LPIN1, KLF15, SOX7, APLN	56	2227	20010	1.9254	1	0.640089	0.640089
	GOTERM_BP_FAT	GO:0002674~negative regulation of acute inflammatory response	2	3.07692	0.0378128	ADORA1, PPARG	56	14	20010	51.0459	1	0.640089	0.640089
	GOTERM_BP_FAT	GO:0051938~L-glutamate import	2	3.07692	0.0378128	PER2, SLC1A1	56	14	20010	51.0459	1	0.640089	0.640089
	GOTERM_BP_FAT	GO:0048514~blood vessel morphogenesis	6	9.23077	0.0381005	EMCN, SLC1A1, PPARG, CSPG4, ARHGAP24, APLN	56	678	20010	3.16214	1	0.640089	0.640089
	GOTERM_BP_FAT	GO:0045893~positive regulation of transcription, DNA-templated	10	15.3846	0.0395316	HLF, MCF2L, ZBTB16, ITGA6, NR1D2, PPARG, LPIN1, KLF15, SOX7, APLN	56	1689	20010	2.11558	1	0.654068	0.654068
	GOTERM_BP_FAT	GO:1903508~positive regulation of nucleic acid-templated transcription	10	15.3846	0.0395316	HLF, MCF2L, ZBTB16, ITGA6, NR1D2, PPARG, LPIN1, KLF15, SOX7, APLN	56	1689	20010	2.11558	1	0.654068	0.654068
	GOTERM_BP_FAT	GO:0042325~regulation of phosphorylation	10	15.3846	0.0400428	TCIM, HFE, GPD1, SLC1A1, ADORA1, ITGA6, PPARG, CSPG4, VLDLR, APLN	56	1693	20010	2.11058	1	0.657545	0.657545
	GOTERM_BP_FAT	GO:0009725~response to hormone	7	10.7692	0.0406699	MAT2A, NR1D2, PPARG, OTOP1, LPIN1, CPEB2, KLF15	56	925	20010	2.70405	1	0.658246	0.658246
	GOTERM_BP_FAT	GO:1902680~positive regulation of RNA biosynthetic process	10	15.3846	0.0406883	HLF, MCF2L, ZBTB16, ITGA6, NR1D2, PPARG, LPIN1, KLF15, SOX7, APLN	56	1698	20010	2.10437	1	0.658246	0.658246
	GOTERM_BP_FAT	GO:0002790~peptide secretion	5	7.69231	0.0424556	PER2, HFE, ADORA1, PPARG, APLN	56	479	20010	3.72987	1	0.673651	0.673651
	GOTERM_BP_FAT	GO:0006631~fatty acid metabolic process	5	7.69231	0.0424556	PER2, FABP5, PPARG, LPIN1, HACD2	56	479	20010	3.72987	1	0.673651	0.673651
	GOTERM_BP_FAT	GO:0050790~regulation of catalytic activity	11	16.9231	0.0428022	ACER2, TCIM, SLC1A1, ADORA1, ITGA6, PPARG, VLDLR, LPIN1, CPEB2, SOX7, ARHGAP24	56	1990	20010	1.97514	1	0.673651	0.673651
	GOTERM_BP_FAT	GO:0043434~response to peptide hormone	5	7.69231	0.0430003	PPARG, OTOP1, LPIN1, CPEB2, KLF15	56	481	20010	3.71436	1	0.673651	0.673651
	GOTERM_BP_FAT	GO:0051952~regulation of amine transport	3	4.61538	0.0437409	PER2, SYT12, ADORA1	56	121	20010	8.85921	1	0.673651	0.673651
	GOTERM_BP_FAT	GO:0022900~electron transport chain	3	4.61538	0.0443932	GPD1, MT-CO2, MT-CO3	56	122	20010	8.78659	1	0.673651	0.673651
	GOTERM_BP_FAT	GO:0010648~negative regulation of cell communication	9	13.8462	0.0445061	RGS5, TCIM, ADORA1, ITGA6, PPARG, OTOP1, OPTN, ARHGAP24, APLN	56	1457	20010	2.2072	1	0.673651	0.673651
	GOTERM_BP_FAT	GO:0032270~positive regulation of cellular protein metabolic process	10	15.3846	0.0449901	ACER2, TCIM, HFE, SLC1A1, ADORA1, PPARG, CSPG4, VLDLR, LPIN1, SOX7	56	1730	20010	2.06544	1	0.673651	0.673651
	GOTERM_BP_FAT	GO:0031399~regulation of protein modification process	11	16.9231	0.0450842	PER2, ACER2, TCIM, HFE, SLC1A1, ADORA1, PPARG, CSPG4, VLDLR, LPIN1, KLF15	56	2008	20010	1.95744	1	0.673651	0.673651
	GOTERM_BP_FAT	GO:0023057~negative regulation of signaling	9	13.8462	0.0451125	RGS5, TCIM, ADORA1, ITGA6, PPARG, OTOP1, OPTN, ARHGAP24, APLN	56	1461	20010	2.20116	1	0.673651	0.673651
	GOTERM_BP_FAT	GO:0060330~regulation of response to interferon-gamma	2	3.07692	0.045731	PPARG, OTOP1	56	17	20010	42.0378	1	0.673651	0.673651
	GOTERM_BP_FAT	GO:0060334~regulation of interferon-gamma-mediated signaling pathway	2	3.07692	0.045731	PPARG, OTOP1	56	17	20010	42.0378	1	0.673651	0.673651
	GOTERM_BP_FAT	GO:0032268~regulation of cellular protein metabolic process	14	21.5385	0.0462088	HFE, SLC1A1, VLDLR, KLF15, PER2, ACER2, TCIM, MKNK2, ADORA1, PPARG, CSPG4, LPIN1, CPEB2, SOX7	56	2887	20010	1.73277	1	0.673651	0.673651
	GOTERM_BP_FAT	GO:0009150~purine ribonucleotide metabolic process	5	7.69231	0.0463516	PANK3, GPD1, MT-CO2, MT-CO3, GM10925	56	493	20010	3.62395	1	0.673651	0.673651
	GOTERM_BP_FAT	GO:0031644~regulation of neurological system process	3	4.61538	0.0463717	FABP5, ADORA1, LPIN1	56	125	20010	8.57571	1	0.673651	0.673651
	GOTERM_BP_FAT	GO:1903530~regulation of secretion by cell	6	9.23077	0.0465757	PER2, SYT12, HFE, ADORA1, PPARG, APLN	56	717	20010	2.99014	1	0.673651	0.673651
	GOTERM_BP_FAT	GO:0015837~amine transport	3	4.61538	0.0470384	PER2, SYT12, ADORA1	56	126	20010	8.50765	1	0.675867	0.675867
	GOTERM_BP_FAT	GO:0071241~cellular response to inorganic substance	4	6.15385	0.0482528	SYT12, HFE, SLC1A1, PPARG	56	297	20010	4.81241	1	0.685779	0.685779
	GOTERM_BP_FAT	GO:0042754~negative regulation of circadian rhythm	2	3.07692	0.0483562	PER2, ADORA1	56	18	20010	39.7024	1	0.685779	0.685779
	GOTERM_BP_FAT	GO:0046034~ATP metabolic process	4	6.15385	0.0502619	GPD1, MT-CO2, MT-CO3, GM10925	56	302	20010	4.73273	1	0.702718	0.702718
	GOTERM_BP_FAT	GO:0015810~aspartate transport	2	3.07692	0.0509743	SLC1A1, LRRC8C	56	19	20010	37.6128	1	0.702718	0.702718
	GOTERM_BP_FAT	GO:0006163~purine nucleotide metabolic process	5	7.69231	0.0510428	PANK3, GPD1, MT-CO2, MT-CO3, GM10925	56	509	20010	3.51003	1	0.702718	0.702718
	GOTERM_BP_FAT	GO:0046394~carboxylic acid biosynthetic process	4	6.15385	0.0514868	PER2, LDHB, FABP5, HACD2	56	305	20010	4.68618	1	0.702718	0.702718
	GOTERM_BP_FAT	GO:0016053~organic acid biosynthetic process	4	6.15385	0.0514868	PER2, LDHB, FABP5, HACD2	56	305	20010	4.68618	1	0.702718	0.702718
	GOTERM_BP_FAT	GO:0043603~cellular amide metabolic process	8	12.3077	0.0517023	PER2, ACER2, MT-TP, MT-RNR2, MKNK2, SLC1A1, PPARG, CPEB2	56	1237	20010	2.31089	1	0.702718	0.702718
	GOTERM_BP_FAT	GO:0048259~regulation of receptor-mediated endocytosis	3	4.61538	0.0518029	HFE, PPARG, APLN	56	133	20010	8.05988	1	0.702718	0.702718
	GOTERM_BP_FAT	GO:0009259~ribonucleotide metabolic process	5	7.69231	0.0522553	PANK3, GPD1, MT-CO2, MT-CO3, GM10925	56	513	20010	3.48266	1	0.702892	0.702892
	GOTERM_BP_FAT	GO:0044723~single-organism carbohydrate metabolic process	5	7.69231	0.0525609	PER2, FABP5, PPP1R3D, GPD1, ALDH1A7	56	514	20010	3.47589	1	0.702892	0.702892
	GOTERM_BP_FAT	GO:0051254~positive regulation of RNA metabolic process	10	15.3846	0.0527812	HLF, MCF2L, ZBTB16, ITGA6, NR1D2, PPARG, LPIN1, KLF15, SOX7, APLN	56	1783	20010	2.00405	1	0.702892	0.702892
	GOTERM_BP_FAT	GO:0030072~peptide hormone secretion	4	6.15385	0.0531427	PER2, HFE, PPARG, APLN	56	309	20010	4.62552	1	0.703416	0.703416
	GOTERM_BP_FAT	GO:0060333~interferon-gamma-mediated signaling pathway	2	3.07692	0.0535853	PPARG, OTOP1	56	20	20010	35.7321	1	0.705001	0.705001
	GOTERM_BP_FAT	GO:0071243~cellular response to arsenic-containing substance	2	3.07692	0.0561892	MKNK2, CPEB2	56	21	20010	34.0306	1	0.734834	0.734834
	GOTERM_BP_FAT	GO:0006898~receptor-mediated endocytosis	4	6.15385	0.0569621	HFE, PPARG, VLDLR, APLN	56	318	20010	4.49461	1	0.736126	0.736126
	GOTERM_BP_FAT	GO:0071375~cellular response to peptide hormone stimulus	4	6.15385	0.0569621	PPARG, OTOP1, LPIN1, CPEB2	56	318	20010	4.49461	1	0.736126	0.736126
	GOTERM_BP_FAT	GO:0019693~ribose phosphate metabolic process	5	7.69231	0.057585	PANK3, GPD1, MT-CO2, MT-CO3, GM10925	56	530	20010	3.37096	1	0.738273	0.738273
	GOTERM_BP_FAT	GO:0051247~positive regulation of protein metabolic process	10	15.3846	0.0587268	ACER2, TCIM, HFE, SLC1A1, ADORA1, PPARG, CSPG4, VLDLR, LPIN1, SOX7	56	1820	20010	1.9633	1	0.738273	0.738273
	GOTERM_BP_FAT	GO:0033554~cellular response to stress	11	16.9231	0.0589971	ACER2, POLN, TCIM, HFE, SLC1A1, LRRC8C, PPARG, KMT5A, VLDLR, CPEB2, OPTN	56	2106	20010	1.86635	1	0.738273	0.738273
	GOTERM_BP_FAT	GO:0048646~anatomical structure formation involved in morphogenesis	8	12.3077	0.0590378	EMCN, MFNG, SLC1A1, PPARG, CSPG4, SOX7, ARHGAP24, APLN	56	1275	20010	2.24202	1	0.738273	0.738273
	GOTERM_BP_FAT	GO:0031328~positive regulation of cellular biosynthetic process	11	16.9231	0.0597762	HLF, MCF2L, ZBTB16, ITGA6, NR1D2, PPARG, MT-CO2, LPIN1, KLF15, SOX7, APLN	56	2111	20010	1.86193	1	0.738273	0.738273
	GOTERM_BP_FAT	GO:0034645~cellular macromolecule biosynthetic process	21	32.3077	0.0609505	MT-TP, HLF, POLN, HFE, ZBTB16, NR1D2, KLF15, APLN, PER2, ACER2, TCIM, MT-RNR2, MCF2L, MKNK2, PPP1R3D, PPARG, ITGA6, KMT5A, LPIN1, CPEB2, SOX7	56	5229	20010	1.43503	1	0.738273	0.738273
	GOTERM_BP_FAT	GO:0006089~lactate metabolic process	2	3.07692	0.061376	PER2, LDHB	56	23	20010	31.0714	1	0.738273	0.738273
	GOTERM_BP_FAT	GO:0035357~peroxisome proliferator activated receptor signaling pathway	2	3.07692	0.061376	FABP5, PPARG	56	23	20010	31.0714	1	0.738273	0.738273
	GOTERM_BP_FAT	GO:0001568~blood vessel development	6	9.23077	0.0622177	EMCN, SLC1A1, PPARG, CSPG4, ARHGAP24, APLN	56	779	20010	2.75215	1	0.738273	0.738273
	GOTERM_BP_FAT	GO:0009205~purine ribonucleoside triphosphate metabolic process	4	6.15385	0.0631573	GPD1, MT-CO2, MT-CO3, GM10925	56	332	20010	4.30508	1	0.738273	0.738273
	GOTERM_BP_FAT	GO:0090407~organophosphate biosynthetic process	5	7.69231	0.0635377	PANK3, FABP5, MT-CO2, LPIN1, GM10925	56	548	20010	3.26023	1	0.738273	0.738273
	GOTERM_BP_FAT	GO:0050872~white fat cell differentiation	2	3.07692	0.0639589	PER2, PPARG	56	24	20010	29.7768	1	0.738273	0.738273
	GOTERM_BP_FAT	GO:0098739~import across plasma membrane	3	4.61538	0.0640478	HFE, SLC1A1, ABCC9	56	150	20010	7.14643	1	0.738273	0.738273
	GOTERM_BP_FAT	GO:0051130~positive regulation of cellular component organization	9	13.8462	0.0641951	CLSTN2, HFE, LRTM1, ITGA6, PPARG, VLDLR, LPIN1, OPTN, APLN	56	1572	20010	2.04573	1	0.738273	0.738273
	GOTERM_BP_FAT	GO:0034654~nucleobase-containing compound biosynthetic process	18	27.6923	0.0643545	PANK3, HLF, POLN, HFE, ZBTB16, NR1D2, KLF15, APLN, PER2, TCIM, MCF2L, PPARG, MT-CO2, ITGA6, KMT5A, LPIN1, SOX7, GM10925	56	4285	20010	1.501	1	0.738273	0.738273
	GOTERM_BP_FAT	GO:0006357~regulation of transcription from RNA polymerase II promoter	13	20	0.0644749	HLF, HFE, ZBTB16, NR1D2, KLF15, APLN, PER2, MCF2L, PPARG, ITGA6, KMT5A, LPIN1, SOX7	56	2731	20010	1.70091	1	0.738273	0.738273
	GOTERM_BP_FAT	GO:0046683~response to organophosphorus	3	4.61538	0.0647962	MAT2A, GPD1, ABCC9	56	151	20010	7.0991	1	0.738273	0.738273
	GOTERM_BP_FAT	GO:0002526~acute inflammatory response	3	4.61538	0.0647962	HFE, ADORA1, PPARG	56	151	20010	7.0991	1	0.738273	0.738273
	GOTERM_BP_FAT	GO:0072521~purine-containing compound metabolic process	5	7.69231	0.0649035	PANK3, GPD1, MT-CO2, MT-CO3, GM10925	56	552	20010	3.23661	1	0.738273	0.738273
	GOTERM_BP_FAT	GO:0009167~purine ribonucleoside monophosphate metabolic process	4	6.15385	0.0654434	GPD1, MT-CO2, MT-CO3, GM10925	56	337	20010	4.2412	1	0.738273	0.738273
	GOTERM_BP_FAT	GO:0045598~regulation of fat cell differentiation	3	4.61538	0.0655475	ZBTB16, PPARG, LPIN1	56	152	20010	7.0524	1	0.738273	0.738273
	GOTERM_BP_FAT	GO:0009968~negative regulation of signal transduction	8	12.3077	0.0656994	RGS5, TCIM, ITGA6, PPARG, OTOP1, OPTN, ARHGAP24, APLN	56	1307	20010	2.18712	1	0.738273	0.738273
	GOTERM_BP_FAT	GO:0009144~purine nucleoside triphosphate metabolic process	4	6.15385	0.0659052	GPD1, MT-CO2, MT-CO3, GM10925	56	338	20010	4.22866	1	0.738273	0.738273
	GOTERM_BP_FAT	GO:0009126~purine nucleoside monophosphate metabolic process	4	6.15385	0.0659052	GPD1, MT-CO2, MT-CO3, GM10925	56	338	20010	4.22866	1	0.738273	0.738273
	GOTERM_BP_FAT	GO:0071456~cellular response to hypoxia	3	4.61538	0.0663017	PPARG, VLDLR, CPEB2	56	153	20010	7.0063	1	0.738273	0.738273
	GOTERM_BP_FAT	GO:0050728~negative regulation of inflammatory response	3	4.61538	0.0663017	ADORA1, NR1D2, PPARG	56	153	20010	7.0063	1	0.738273	0.738273
	GOTERM_BP_FAT	GO:0015740~C4-dicarboxylate transport	2	3.07692	0.0665348	SLC1A1, LRRC8C	56	25	20010	28.5857	1	0.738273	0.738273
	GOTERM_BP_FAT	GO:0009199~ribonucleoside triphosphate metabolic process	4	6.15385	0.0668334	GPD1, MT-CO2, MT-CO3, GM10925	56	340	20010	4.20378	1	0.738273	0.738273
	GOTERM_BP_FAT	GO:2000112~regulation of cellular macromolecule biosynthetic process	18	27.6923	0.0672651	HLF, HFE, ZBTB16, NR1D2, KLF15, APLN, PER2, ACER2, TCIM, MCF2L, MKNK2, PPP1R3D, PPARG, ITGA6, KMT5A, LPIN1, CPEB2, SOX7	56	4309	20010	1.49264	1	0.738273	0.738273
	GOTERM_BP_FAT	GO:1901652~response to peptide	5	7.69231	0.0673309	PPARG, OTOP1, LPIN1, CPEB2, KLF15	56	559	20010	3.19608	1	0.738273	0.738273
	GOTERM_BP_FAT	GO:0009891~positive regulation of biosynthetic process	11	16.9231	0.0676074	HLF, MCF2L, ZBTB16, ITGA6, NR1D2, PPARG, MT-CO2, LPIN1, KLF15, SOX7, APLN	56	2159	20010	1.82054	1	0.738273	0.738273
	GOTERM_BP_FAT	GO:0055093~response to hyperoxia	2	3.07692	0.0691038	PPARG, GM10925	56	26	20010	27.4863	1	0.741792	0.741792
	GOTERM_BP_FAT	GO:0015813~L-glutamate transport	2	3.07692	0.0691038	PER2, SLC1A1	56	26	20010	27.4863	1	0.741792	0.741792
	GOTERM_BP_FAT	GO:0001666~response to hypoxia	4	6.15385	0.0691803	ADORA1, PPARG, VLDLR, CPEB2	56	345	20010	4.14286	1	0.741792	0.741792
	GOTERM_BP_FAT	GO:0001525~angiogenesis	5	7.69231	0.0705213	EMCN, PPARG, CSPG4, ARHGAP24, APLN	56	568	20010	3.14544	1	0.741792	0.741792
	GOTERM_BP_FAT	GO:0002683~negative regulation of immune system process	5	7.69231	0.0708806	HFE, ZBTB16, ADORA1, PPARG, OTOP1	56	569	20010	3.13991	1	0.741792	0.741792
	GOTERM_BP_FAT	GO:0051046~regulation of secretion	6	9.23077	0.0710428	PER2, SYT12, HFE, ADORA1, PPARG, APLN	56	810	20010	2.64683	1	0.741792	0.741792
	GOTERM_BP_FAT	GO:0050806~positive regulation of synaptic transmission	4	6.15385	0.0710848	CLSTN2, SYT12, SLC1A1, ADORA1	56	349	20010	4.09537	1	0.741792	0.741792
	GOTERM_BP_FAT	GO:0051246~regulation of protein metabolic process	14	21.5385	0.0711255	HFE, SLC1A1, VLDLR, KLF15, PER2, ACER2, TCIM, MKNK2, ADORA1, PPARG, CSPG4, LPIN1, CPEB2, SOX7	56	3080	20010	1.62419	1	0.741792	0.741792
	GOTERM_BP_FAT	GO:0045944~positive regulation of transcription from RNA polymerase II promoter	8	12.3077	0.0714413	HLF, MCF2L, ITGA6, NR1D2, PPARG, LPIN1, KLF15, APLN	56	1333	20010	2.14446	1	0.741792	0.741792
	GOTERM_BP_FAT	GO:0003299~muscle hypertrophy in response to stress	2	3.07692	0.0716658	PPARG, KLF15	56	27	20010	26.4683	1	0.741792	0.741792
	GOTERM_BP_FAT	GO:0014898~cardiac muscle hypertrophy in response to stress	2	3.07692	0.0716658	PPARG, KLF15	56	27	20010	26.4683	1	0.741792	0.741792
	GOTERM_BP_FAT	GO:0071705~nitrogen compound transport	11	16.9231	0.0724735	PER2, SYT12, HFE, SLC1A1, ADORA1, LRRC8C, SLC16A12, PPARG, VLDLR, OPTN, APLN	56	2187	20010	1.79723	1	0.746614	0.746614
	GOTERM_BP_FAT	GO:0043043~peptide biosynthetic process	6	9.23077	0.0728279	PER2, MT-TP, MT-RNR2, SLC1A1, PPARG, CPEB2	56	816	20010	2.62736	1	0.746742	0.746742
	GOTERM_BP_FAT	GO:0001934~positive regulation of protein phosphorylation	7	10.7692	0.0736079	TCIM, HFE, SLC1A1, ADORA1, PPARG, CSPG4, VLDLR	56	1075	20010	2.32674	1	0.746995	0.746995
	GOTERM_BP_FAT	GO:0018130~heterocycle biosynthetic process	18	27.6923	0.0736259	PANK3, HLF, POLN, HFE, ZBTB16, NR1D2, KLF15, APLN, PER2, TCIM, MCF2L, PPARG, MT-CO2, ITGA6, KMT5A, LPIN1, SOX7, GM10925	56	4359	20010	1.47552	1	0.746995	0.746995
	GOTERM_BP_FAT	GO:0009161~ribonucleoside monophosphate metabolic process	4	6.15385	0.073986	GPD1, MT-CO2, MT-CO3, GM10925	56	355	20010	4.02616	1	0.746995	0.746995
	GOTERM_BP_FAT	GO:0010556~regulation of macromolecule biosynthetic process	18	27.6923	0.0745488	HLF, HFE, ZBTB16, NR1D2, KLF15, APLN, PER2, ACER2, TCIM, MCF2L, MKNK2, PPP1R3D, PPARG, ITGA6, KMT5A, LPIN1, CPEB2, SOX7	56	4366	20010	1.47315	1	0.746995	0.746995
	GOTERM_BP_FAT	GO:0019438~aromatic compound biosynthetic process	18	27.6923	0.074814	PANK3, HLF, POLN, HFE, ZBTB16, NR1D2, KLF15, APLN, PER2, TCIM, MCF2L, PPARG, MT-CO2, ITGA6, KMT5A, LPIN1, SOX7, GM10925	56	4368	20010	1.47248	1	0.746995	0.746995
	GOTERM_BP_FAT	GO:0072358~cardiovascular system development	6	9.23077	0.0752467	EMCN, SLC1A1, PPARG, CSPG4, ARHGAP24, APLN	56	824	20010	2.60186	1	0.746995	0.746995
	GOTERM_BP_FAT	GO:0001944~vasculature development	6	9.23077	0.0752467	EMCN, SLC1A1, PPARG, CSPG4, ARHGAP24, APLN	56	824	20010	2.60186	1	0.746995	0.746995
	GOTERM_BP_FAT	GO:0009141~nucleoside triphosphate metabolic process	4	6.15385	0.0759495	GPD1, MT-CO2, MT-CO3, GM10925	56	359	20010	3.9813	1	0.75056	0.75056
	GOTERM_BP_FAT	GO:0014887~cardiac muscle adaptation	2	3.07692	0.0767691	PPARG, KLF15	56	29	20010	24.6429	1	0.751081	0.751081
	GOTERM_BP_FAT	GO:0052548~regulation of endopeptidase activity	4	6.15385	0.07694	ACER2, SLC1A1, PPARG, SOX7	56	361	20010	3.95924	1	0.751081	0.751081
	GOTERM_BP_FAT	GO:0045862~positive regulation of proteolysis	4	6.15385	0.0779362	ACER2, SLC1A1, PPARG, SOX7	56	363	20010	3.93743	1	0.751081	0.751081
	GOTERM_BP_FAT	GO:0016052~carbohydrate catabolic process	3	4.61538	0.0787552	PPP1R3D, GPD1, ALDH1A7	56	169	20010	6.34298	1	0.751081	0.751081
	GOTERM_BP_FAT	GO:0019362~pyridine nucleotide metabolic process	3	4.61538	0.0787552	LDHB, GPD1, IDH3A	56	169	20010	6.34298	1	0.751081	0.751081
	GOTERM_BP_FAT	GO:0046496~nicotinamide nucleotide metabolic process	3	4.61538	0.0787552	LDHB, GPD1, IDH3A	56	169	20010	6.34298	1	0.751081	0.751081
	GOTERM_BP_FAT	GO:0031401~positive regulation of protein modification process	8	12.3077	0.0789156	TCIM, HFE, SLC1A1, ADORA1, PPARG, CSPG4, VLDLR, LPIN1	56	1365	20010	2.09419	1	0.751081	0.751081
	GOTERM_BP_FAT	GO:0010941~regulation of cell death	10	15.3846	0.0791502	ACER2, TCIM, ZBTB16, SLC1A1, ADORA1, ITGA6, PPARG, MT-CO2, SOX7, OPTN	56	1931	20010	1.85045	1	0.751081	0.751081
	GOTERM_BP_FAT	GO:0101023~vascular endothelial cell proliferation	2	3.07692	0.0793104	PPARG, APLN	56	30	20010	23.8214	1	0.751081	0.751081
	GOTERM_BP_FAT	GO:0009123~nucleoside monophosphate metabolic process	4	6.15385	0.0794413	GPD1, MT-CO2, MT-CO3, GM10925	56	366	20010	3.90515	1	0.751081	0.751081
	GOTERM_BP_FAT	GO:0007166~cell surface receptor signaling pathway	13	20	0.0812622	HFE, SLC1A1, OTOP1, VLDLR, APLN, TCIM, MFNG, MKNK2, ADORA1, PPARG, ITGA6, CSPG4, SOX7	56	2837	20010	1.63736	1	0.763885	0.763885
	GOTERM_BP_FAT	GO:1905562~regulation of vascular endothelial cell proliferation	2	3.07692	0.0818448	PPARG, APLN	56	31	20010	23.053	1	0.763885	0.763885
	GOTERM_BP_FAT	GO:0010460~positive regulation of heart rate	2	3.07692	0.0818448	SLC1A1, APLN	56	31	20010	23.053	1	0.763885	0.763885
	GOTERM_BP_FAT	GO:0044255~cellular lipid metabolic process	7	10.7692	0.0824708	PER2, ACER2, FABP5, GPD1, PPARG, LPIN1, HACD2	56	1108	20010	2.25745	1	0.766452	0.766452
	GOTERM_BP_FAT	GO:0046887~positive regulation of hormone secretion	3	4.61538	0.0836018	HFE, PPARG, APLN	56	175	20010	6.12551	1	0.773671	0.773671
	GOTERM_BP_FAT	GO:0003085~negative regulation of systemic arterial blood pressure	2	3.07692	0.0843724	ADORA1, APLN	56	32	20010	22.3326	1	0.775535	0.775535
	GOTERM_BP_FAT	GO:0032870~cellular response to hormone stimulus	5	7.69231	0.0848391	NR1D2, PPARG, OTOP1, LPIN1, CPEB2	56	606	20010	2.9482	1	0.775535	0.775535
	GOTERM_BP_FAT	GO:0072524~pyridine-containing compound metabolic process	3	4.61538	0.086059	LDHB, GPD1, IDH3A	56	178	20010	6.02227	1	0.775535	0.775535
	GOTERM_BP_FAT	GO:0071310~cellular response to organic substance	13	20	0.0868451	HFE, SLC1A1, NR1D2, OTOP1, KLF15, APLN, MAT2A, GPD1, PPARG, ITGA6, LPIN1, CPEB2, OPTN	56	2869	20010	1.61909	1	0.775535	0.775535
	GOTERM_BP_FAT	GO:0097746~regulation of blood vessel diameter	3	4.61538	0.086883	PER2, ADORA1, APLN	56	179	20010	5.98863	1	0.775535	0.775535
	GOTERM_BP_FAT	GO:0050880~regulation of blood vessel size	3	4.61538	0.086883	PER2, ADORA1, APLN	56	179	20010	5.98863	1	0.775535	0.775535
	GOTERM_BP_FAT	GO:0035296~regulation of tube diameter	3	4.61538	0.086883	PER2, ADORA1, APLN	56	179	20010	5.98863	1	0.775535	0.775535
	GOTERM_BP_FAT	GO:0036296~response to increased oxygen levels	2	3.07692	0.0868931	PPARG, GM10925	56	33	20010	21.6558	1	0.775535	0.775535
	GOTERM_BP_FAT	GO:0007267~cell-cell signaling	9	13.8462	0.0870823	PER2, CLSTN2, SYT12, HFE, SLC1A1, ADORA1, PPARG, SOX7, APLN	56	1680	20010	1.91422	1	0.775535	0.775535
	GOTERM_BP_FAT	GO:0010557~positive regulation of macromolecule biosynthetic process	10	15.3846	0.0876961	HLF, MCF2L, ZBTB16, ITGA6, NR1D2, PPARG, LPIN1, KLF15, SOX7, APLN	56	1972	20010	1.81197	1	0.775535	0.775535
	GOTERM_BP_FAT	GO:0035150~regulation of tube size	3	4.61538	0.0877094	PER2, ADORA1, APLN	56	180	20010	5.95536	1	0.775535	0.775535
	GOTERM_BP_FAT	GO:0009894~regulation of catabolic process	6	9.23077	0.089333	ACER2, HFE, PPP1R3D, GPD1, ADORA1, OPTN	56	868	20010	2.46996	1	0.786707	0.786707
	GOTERM_BP_FAT	GO:0050808~synapse organization	4	6.15385	0.0913993	CLSTN2, NCAN, LRTM1, SLC1A1	56	389	20010	3.67426	1	0.801671	0.801671
	GOTERM_BP_FAT	GO:0036294~cellular response to decreased oxygen levels	3	4.61538	0.0918768	PPARG, VLDLR, CPEB2	56	185	20010	5.7944	1	0.802636	0.802636
	GOTERM_BP_FAT	GO:0006733~oxidoreduction coenzyme metabolic process	3	4.61538	0.0927173	LDHB, GPD1, IDH3A	56	186	20010	5.76325	1	0.805235	0.805235
	GOTERM_BP_FAT	GO:0010817~regulation of hormone levels	5	7.69231	0.0929117	PER2, HFE, ADORA1, PPARG, APLN	56	626	20010	2.85401	1	0.805235	0.805235
	GOTERM_BP_FAT	GO:0010469~regulation of receptor activity	3	4.61538	0.09356	HFE, ADORA1, PPARG	56	187	20010	5.73243	1	0.807648	0.807648
	GOTERM_BP_FAT	GO:0046903~secretion	7	10.7692	0.0957947	PER2, SYT12, HFE, ADORA1, PPARG, MT-CO2, APLN	56	1154	20010	2.16746	1	0.817171	0.817171
	GOTERM_BP_FAT	GO:0009892~negative regulation of metabolic process	14	21.5385	0.0962349	HFE, ZBTB16, NR1D2, KLF15, APLN, PER2, ACER2, ADORA1, PPARG, KMT5A, LPIN1, CPEB2, SOX7, OPTN	56	3232	20010	1.5478	1	0.817171	0.817171
	GOTERM_BP_FAT	GO:0043092~L-amino acid import	2	3.07692	0.0969082	PER2, SLC1A1	56	37	20010	19.3147	1	0.817171	0.817171
	GOTERM_BP_FAT	GO:0046685~response to arsenic-containing substance	2	3.07692	0.0969082	MKNK2, CPEB2	56	37	20010	19.3147	1	0.817171	0.817171
	GOTERM_BP_FAT	GO:0097178~ruffle assembly	2	3.07692	0.0969082	CSPG4, ARHGAP24	56	37	20010	19.3147	1	0.817171	0.817171
	GOTERM_BP_FAT	GO:1902837~amino acid import into cell	2	3.07692	0.0969082	PER2, SLC1A1	56	37	20010	19.3147	1	0.817171	0.817171
	GOTERM_BP_FAT	GO:0006915~apoptotic process	10	15.3846	0.0977046	ACER2, TCIM, ZBTB16, MKNK2, SLC1A1, ADORA1, ITGA6, PPARG, SOX7, OPTN	56	2017	20010	1.77155	1	0.820719	0.820719
	GOTERM_BP_FAT	GO:0042981~regulation of apoptotic process	9	13.8462	0.0981493	ACER2, TCIM, ZBTB16, SLC1A1, ADORA1, ITGA6, PPARG, SOX7, OPTN	56	1726	20010	1.86321	1	0.821296	0.821296
	GOTERM_BP_FAT	GO:0015718~monocarboxylic acid transport	3	4.61538	0.0986635	FABP5, SLC16A12, PPARG	56	193	20010	5.55422	1	0.822447	0.822447
	GOTERM_CC_FAT	GO:0055037~recycling endosome	5	7.69231	0.00362789	RNF11, TUBA1A, HFE, SLC1A1, OPTN	55	195	16683	7.77762	0.588034	0.803005	0.803005
	GOTERM_CC_FAT	GO:1990204~oxidoreductase complex	4	6.15385	0.00658201	CYB5B, LDHB, GPD1, IDH3A	55	118	16683	10.2823	0.800376	0.803005	0.803005
	GOTERM_CC_FAT	GO:0098798~mitochondrial protein complex	4	6.15385	0.0201958	MT-CO2, MT-CO3, GM10925, IDH3A	55	179	16683	6.77826	0.993114	1	1
	GOTERM_CC_FAT	GO:0043209~myelin sheath	4	6.15385	0.0323713	LDHB, TUBA1A, GNB4, IDH3A	55	215	16683	5.6433	0.999674	1	1
	GOTERM_CC_FAT	GO:0044429~mitochondrial part	8	12.3077	0.0482626	CYB5B, LDHB, MT-RNR2, MT-CO2, MT-CO3, LPIN1, GM10925, IDH3A	55	1035	16683	2.34456	0.999994	1	1
	GOTERM_CC_FAT	GO:0005739~mitochondrion	12	18.4615	0.050268	CYB5B, LDHB, MT-TP, CRYZL2, MT-RNR2, GPD1, ABCC9, MT-CO2, MT-CO3, LPIN1, GM10925, IDH3A	55	1983	16683	1.83557	0.999997	1	1
	GOTERM_CC_FAT	GO:0005751~mitochondrial respiratory chain complex IV	2	3.07692	0.0749094	MT-CO2, MT-CO3	55	24	16683	25.2773	1	1	1
	GOTERM_CC_FAT	GO:0098800~inner mitochondrial membrane protein complex	3	4.61538	0.0782235	MT-CO2, MT-CO3, GM10925	55	143	16683	6.36351	1	1	1
	GOTERM_CC_FAT	GO:0045277~respiratory chain complex IV	2	3.07692	0.0838769	MT-CO2, MT-CO3	55	27	16683	22.4687	1	1	1
	GOTERM_MF_FAT	GO:0042802~identical protein binding	16	24.6154	0.00703705	PANK3, ZBTB16, ATL2, SLC1A1, ABCC9, APLN, PER2, MRAP, LDHB, TUBA1A, FABP5, MAT2A, GPD1, PPARG, ALDH1A7, OPTN	58	2431	18079	2.05155	0.936785	1	1
	GOTERM_MF_FAT	GO:0009055~electron carrier activity	3	4.61538	0.0121411	CYB5B, MT-CO2, MT-CO3	58	53	18079	17.6438	0.991572	1	1
	GOTERM_MF_FAT	GO:0051287~NAD binding	3	4.61538	0.0205649	LDHB, GPD1, IDH3A	58	70	18079	13.3589	0.999704	1	1
	GOTERM_MF_FAT	GO:0015077~monovalent inorganic cation transmembrane transporter activity	5	7.69231	0.0216045	SLC1A1, ABCC9, MT-CO2, MT-CO3, GM10925	58	337	18079	4.62473	0.999804	1	1
	GOTERM_MF_FAT	GO:0022804~active transmembrane transporter activity	5	7.69231	0.031187	SLC1A1, SLC16A12, ABCC9, MT-CO3, GM10925	58	378	18079	4.12311	0.999996	1	1
	GOTERM_MF_FAT	GO:0031406~carboxylic acid binding	4	6.15385	0.0375661	FABP5, MAT2A, SLC1A1, PPARG	58	234	18079	5.32832	1	1	1
	GOTERM_MF_FAT	GO:0015078~hydrogen ion transmembrane transporter activity	3	4.61538	0.0397044	MT-CO2, MT-CO3, GM10925	58	100	18079	9.35121	1	1	1
	GOTERM_MF_FAT	GO:0043177~organic acid binding	4	6.15385	0.0434076	FABP5, MAT2A, SLC1A1, PPARG	58	248	18079	5.02753	1	1	1
	GOTERM_MF_FAT	GO:0008324~cation transmembrane transporter activity	6	9.23077	0.0490564	SLC1A1, ABCC9, MT-CO2, OTOP1, MT-CO3, GM10925	58	634	18079	2.94991	1	1	1
	GOTERM_MF_FAT	GO:0004129~cytochrome-c oxidase activity	2	3.07692	0.0582621	MT-CO2, MT-CO3	58	19	18079	32.8113	1	1	1
	GOTERM_MF_FAT	GO:0016676~oxidoreductase activity, acting on a heme group of donors, oxygen as acceptor	2	3.07692	0.0582621	MT-CO2, MT-CO3	58	19	18079	32.8113	1	1	1
	GOTERM_MF_FAT	GO:0015002~heme-copper terminal oxidase activity	2	3.07692	0.0582621	MT-CO2, MT-CO3	58	19	18079	32.8113	1	1	1
	GOTERM_MF_FAT	GO:0022853~active ion transmembrane transporter activity	3	4.61538	0.0591597	SLC1A1, ABCC9, GM10925	58	125	18079	7.48097	1	1	1
	GOTERM_MF_FAT	GO:0015399~primary active transmembrane transporter activity	3	4.61538	0.060835	ABCC9, MT-CO3, GM10925	58	127	18079	7.36316	1	1	1
	GOTERM_MF_FAT	GO:0016675~oxidoreductase activity, acting on a heme group of donors	2	3.07692	0.0612344	MT-CO2, MT-CO3	58	20	18079	31.1707	1	1	1
	GOTERM_MF_FAT	GO:0001221~transcription cofactor binding	3	4.61538	0.0668249	PER2, ZBTB16, PPARG	58	134	18079	6.97851	1	1	1
	GOTERM_MF_FAT	GO:0043167~ion binding	27	41.5385	0.0668538	RASL12, RNF11, PANK3, CLSTN2, NCAN, SLC1A1, ATL2, LRTM1, VLDLR, EFCAB8, TUBA1A, MAT2A, MCF2L, MKNK2, IDH3A, CYB5B, ABCC9, NR1D2, KLF15, ACER2, FABP5, SYT12, MFNG, PPARG, ITGA6, MT-CO2, OPTN	58	6360	18079	1.32328	1	1	1
	GOTERM_MF_FAT	GO:0036094~small molecule binding	14	21.5385	0.0710347	RASL12, PANK3, ATL2, SLC1A1, ABCC9, LDHB, TUBA1A, FABP5, MAT2A, MKNK2, GPD1, ADORA1, PPARG, IDH3A	58	2681	18079	1.62771	1	1	1
	GOTERM_MF_FAT	GO:0022890~inorganic cation transmembrane transporter activity	5	7.69231	0.0789896	SLC1A1, ABCC9, MT-CO2, MT-CO3, GM10925	58	515	18079	3.02628	1	1	1
	GOTERM_MF_FAT	GO:0003924~GTPase activity	4	6.15385	0.0835114	RASL12, TUBA1A, ATL2, GNB4	58	326	18079	3.82462	1	1	1
	GOTERM_MF_FAT	GO:0016616~oxidoreductase activity, acting on the CH-OH group of donors, NAD or NADP as acceptor	3	4.61538	0.0877754	LDHB, GPD1, IDH3A	58	157	18079	5.95618	1	1	1
	GOTERM_MF_FAT	GO:0046872~metal ion binding	19	29.2308	0.0910138	CYB5B, RNF11, CLSTN2, NCAN, SLC1A1, NR1D2, VLDLR, EFCAB8, KLF15, ACER2, SYT12, MAT2A, MFNG, MKNK2, PPARG, MT-CO2, ITGA6, OPTN, IDH3A	58	4186	18079	1.41482	1	1	1
	GOTERM_MF_FAT	GO:0008134~transcription factor binding	5	7.69231	0.093105	PER2, ZBTB16, PPARG, LPIN1, OPTN	58	546	18079	2.85446	1	1	1
	GOTERM_MF_FAT	GO:0016614~oxidoreductase activity, acting on CH-OH group of donors	3	4.61538	0.0993903	LDHB, GPD1, IDH3A	58	169	18079	5.53326	1	1	1
	KEGG_PATHWAY	mmu01100:Metabolic pathways	11	16.9231	0.0597652	ACER2, LDHB, PANK3, MAT2A, MT-CO2, KMT5A, MT-CO3, LPIN1, HACD2, ALDH1A7, IDH3A	34	1620	8992	1.79579	0.998249	1	1
	KEGG_PATHWAY	mmu05016:Huntington disease	4	6.15385	0.0977844	TUBA1A, PPARG, MT-CO2, MT-CO3	34	302	8992	3.50292	0.999975	1	1
Common down (Quadrant 3)	GOTERM_BP_FAT	GO:0006952~defense response	36	32.4324	7.55255e-11	C1QB, H2-T23, SPON2, C1QA, CSF1R, AHCY, IFI213, PTAFR, HTRA1, IFI211, IL4RA, CFP, THBS1, CTSS, CXCL16, C4B, ZFP36, CCL8, MYC, ZBP1, CD74, PLA2G2D, H2-EB1, PTGIS, SP110, TAP1, ISG15, MPEG1, AGT, IIGP1, IL17RA, AXL, OAS3, PIK3AP1, C1QC, H2-AB1	107	1997	20010	3.37123	2.78916e-07	2.54252e-07	2.37518e-07
	GOTERM_BP_FAT	GO:0071310~cellular response to organic substance	43	38.7387	1.37731e-10	SPON2, ERRFI1, CSF1R, LRP1, IRS1, IFI213, PTAFR, HTRA1, IFI211, IL4RA, ATP1A1, THBS1, RXFP1, CTSS, CXCL16, SOCS2, ZFP36, CCL8, SPOCK2, MYC, CTSH, SLIT3, WNT4, ZBP1, CD74, EGR2, PTGIS, OSR1, KRT8, ISG15, FOS, AGT, IIGP1, IL17RA, MTSS2, ANO1, AXL, OAS3, PGR, EZR, GAS6, NBL1, H2-AB1	107	2869	20010	2.80286	5.08641e-07	2.54252e-07	2.37518e-07
	GOTERM_BP_FAT	GO:0002682~regulation of immune system process	33	29.7297	4.77671e-10	C1QB, H2-T23, SPON2, C1QA, CSF1R, IFI213, GM12248, PTAFR, HTRA1, IFI211, IL4RA, CFP, THBS1, C4B, ZFP36, MYC, CTSH, ZBP1, CD74, PLA2G2D, H2-EB1, TAP1, ISG15, FOS, MAFB, AXL, OAS3, EZR, PIK3AP1, GAS6, NBL1, C1QC, H2-AB1	107	1803	20010	3.4228	1.76404e-06	5.13436e-07	4.79643e-07
	GOTERM_BP_FAT	GO:0006955~immune response	36	32.4324	5.56269e-10	C1QB, H2-T23, SPON2, C1QA, CSF1R, AHCY, LRP1, IFI213, PTAFR, IFI211, IL4RA, CFP, THBS1, CTSS, CXCL16, C4B, CCL8, MYC, CTSH, ZBP1, CD74, PLA2G2D, H2-EB1, SP110, TAP1, ISG15, MPEG1, IIGP1, IL17RA, AXL, OAS3, EZR, PIK3AP1, GAS6, C1QC, H2-AB1	107	2148	20010	3.13423	2.0543e-06	5.13436e-07	4.79643e-07
	GOTERM_BP_FAT	GO:0045087~innate immune response	26	23.4234	7.20255e-10	C1QB, H2-T23, SPON2, C1QA, CSF1R, IFI213, IFI211, CFP, CXCL16, C4B, CCL8, MYC, ZBP1, CD74, H2-EB1, SP110, TAP1, ISG15, MPEG1, IIGP1, IL17RA, AXL, OAS3, PIK3AP1, C1QC, H2-AB1	107	1128	20010	4.3105	2.6599e-06	5.31836e-07	4.96832e-07
	GOTERM_BP_FAT	GO:0051240~positive regulation of multicellular organismal process	34	30.6306	7.08865e-09	H2-T23, SPON2, CSF1R, CEBPD, LRP1, IRS1, GM12248, PTAFR, IFI211, IL4RA, ATP1A1, THBS1, SOCS2, MYC, CTSH, WNT4, CD74, EGR2, PTGIS, OSR1, ISG15, MMD2, FOS, AGT, FBXO31, IL17RA, AXL, OAS3, MYO5B, TMEM119, EZR, GAS6, NBL1, PTPN5	107	2126	20010	2.99074	2.6178e-05	4.04777e-06	3.78135e-06
	GOTERM_BP_FAT	GO:0002683~negative regulation of immune system process	18	16.2162	7.67453e-09	H2-T23, CD74, PLA2G2D, HTRA1, IL4RA, TAP1, ISG15, THBS1, ZFP36, MAFB, AXL, OAS3, MYC, PIK3AP1, EZR, NBL1, C1QC, H2-AB1	107	569	20010	5.91594	2.83416e-05	4.04777e-06	3.78135e-06
	GOTERM_BP_FAT	GO:0034097~response to cytokine	25	22.5225	1.10658e-08	CSF1R, IFI213, IFI211, IL4RA, AFF3, THBS1, CXCL16, ZFP36, CCL8, SPOCK2, MYC, SLIT3, ZBP1, CD74, H2-EB1, PTGIS, KRT8, ISG15, FOS, IIGP1, IL17RA, AXL, OAS3, GAS6, H2-AB1	107	1192	20010	3.92218	4.08651e-05	5.10686e-06	4.77073e-06
	GOTERM_BP_FAT	GO:0048584~positive regulation of response to stimulus	38	34.2342	1.60383e-08	C1QB, H2-T23, SPON2, C1QA, CSF1R, LRP1, IRS1, WWC1, IFI213, PTAFR, IFI211, IL4RA, CFP, THBS1, CTSS, C4B, SLC9A3R1, CCL8, MYC, CTSH, RSPO1, IGFBP6, ZBP1, CD74, PTGIS, MMD2, AGT, IL17RA, ANO1, AXL, OAS3, SIGLEC1, EZR, PIK3AP1, GAS6, PTPN5, C1QC, H2-AB1	107	2689	20010	2.64275	5.92276e-05	6.57926e-06	6.14623e-06
	GOTERM_BP_FAT	GO:0010033~response to organic substance	46	41.4414	5.99436e-08	SPON2, ERRFI1, CSF1R, LRP1, IRS1, IFI213, PTAFR, HTRA1, IFI211, IL4RA, ATP1A1, AFF3, THBS1, RXFP1, CTSS, RERG, CXCL16, SOCS2, ZFP36, CCL8, SPOCK2, MYC, CTSH, SLIT3, WNT4, ZBP1, CD74, EGR2, H2-EB1, PTGIS, OSR1, KRT8, ISG15, FOS, AGT, IIGP1, IL17RA, MTSS2, ANO1, AXL, OAS3, PGR, EZR, GAS6, NBL1, H2-AB1	107	3923	20010	2.19282	0.000221347	2.21312e-05	2.06745e-05
	GOTERM_BP_FAT	GO:0002684~positive regulation of immune system process	25	22.5225	7.48051e-08	C1QB, H2-T23, SPON2, C1QA, CSF1R, IFI213, GM12248, PTAFR, IFI211, IL4RA, CFP, THBS1, C4B, ZBP1, CD74, H2-EB1, ISG15, FOS, AXL, OAS3, EZR, PIK3AP1, GAS6, C1QC, H2-AB1	107	1318	20010	3.54722	0.000276217	2.51073e-05	2.34548e-05
	GOTERM_BP_FAT	GO:0070887~cellular response to chemical stimulus	43	38.7387	8.24142e-08	SPON2, ERRFI1, CSF1R, LRP1, IRS1, IFI213, PTAFR, HTRA1, IFI211, IL4RA, ATP1A1, THBS1, RXFP1, CTSS, CXCL16, SOCS2, ZFP36, CCL8, SPOCK2, MYC, CTSH, SLIT3, WNT4, ZBP1, CD74, EGR2, PTGIS, OSR1, KRT8, ISG15, FOS, AGT, IIGP1, IL17RA, MTSS2, ANO1, AXL, OAS3, PGR, EZR, GAS6, NBL1, H2-AB1	107	3537	20010	2.27351	0.000304309	2.53561e-05	2.36872e-05
	GOTERM_BP_FAT	GO:0051094~positive regulation of developmental process	28	25.2252	2.29976e-07	CSF1R, CEBPD, LRP1, GM12248, IL4RA, THBS1, SOCS2, ZFP36, CCL8, MYC, CTSH, WNT4, CD74, EGR2, PTGIS, OSR1, ISG15, MMD2, FOS, AGT, FBXO31, AXL, MYO5B, TMEM119, EZR, GAS6, NBL1, PTPN5	107	1732	20010	3.02325	0.00084894	6.53131e-05	6.10143e-05
	GOTERM_BP_FAT	GO:0009605~response to external stimulus	39	35.1351	2.93364e-07	H2-T23, SPON2, CSF1R, AHCY, LRP1, SLFN4, PTAFR, HTRA1, IFI211, IL4RA, ATP1A1, THBS1, CTSS, CXCL16, ZFP36, CCL8, MYC, SLIT3, WNT4, ZBP1, CD74, EGR2, PLA2G2D, PTGIS, SP110, KRT8, ISG15, FOS, MPEG1, AGT, IIGP1, IL17RA, ANO1, AXL, OAS3, SIK1, PIK3AP1, GAS6, NBL1	107	3139	20010	2.32347	0.00108281	7.73643e-05	7.22723e-05
	GOTERM_BP_FAT	GO:0050776~regulation of immune response	22	19.8198	3.63961e-07	C1QB, ZBP1, H2-T23, C1QA, SPON2, CD74, PLA2G2D, IFI213, PTAFR, IFI211, IL4RA, TAP1, ISG15, CFP, C4B, AXL, OAS3, CTSH, PIK3AP1, EZR, C1QC, H2-AB1	107	1122	20010	3.66685	0.00134321	8.9583e-05	8.36868e-05
	GOTERM_BP_FAT	GO:0045597~positive regulation of cell differentiation	23	20.7207	4.18077e-07	CSF1R, CD74, EGR2, CEBPD, LRP1, GM12248, IL4RA, MMD2, ISG15, FOS, AGT, FBXO31, SOCS2, ZFP36, CCL8, AXL, MYC, MYO5B, TMEM119, GAS6, NBL1, PTPN5, WNT4	107	1234	20010	3.48559	0.00154277	9.64712e-05	9.01216e-05
	GOTERM_BP_FAT	GO:0071345~cellular response to cytokine stimulus	21	18.9189	6.67283e-07	ZBP1, CSF1R, CD74, PTGIS, IFI213, KRT8, IFI211, IL4RA, ISG15, THBS1, IIGP1, IL17RA, ZFP36, CCL8, AXL, OAS3, SPOCK2, MYC, SLIT3, GAS6, H2-AB1	107	1063	20010	3.69445	0.00246124	0.000144918	0.00013538
	GOTERM_BP_FAT	GO:0002478~antigen processing and presentation of exogenous peptide antigen	6	5.40541	9.34008e-07	H2-T23, CD74, H2-EB1, TAP1, CTSS, H2-AB1	107	34	20010	33.0016	0.00344335	0.000191575	0.000178966
	GOTERM_BP_FAT	GO:0001817~regulation of cytokine production	18	16.2162	1.35361e-06	H2-T23, ERRFI1, SPON2, CSF1R, CD74, LRP1, PTAFR, IFI211, IL4RA, ISG15, THBS1, AGT, IL17RA, ZFP36, AXL, OAS3, EZR, GAS6	107	818	20010	4.11512	0.00498641	0.000263028	0.000245716
	GOTERM_BP_FAT	GO:0001816~cytokine production	18	16.2162	2.42643e-06	H2-T23, ERRFI1, SPON2, CSF1R, CD74, LRP1, PTAFR, IFI211, IL4RA, ISG15, THBS1, AGT, IL17RA, ZFP36, AXL, OAS3, EZR, GAS6	107	854	20010	3.94165	0.00892077	0.000429414	0.000401151
	GOTERM_BP_FAT	GO:0019884~antigen processing and presentation of exogenous antigen	6	5.40541	2.4425e-06	H2-T23, CD74, H2-EB1, TAP1, CTSS, H2-AB1	107	41	20010	27.3672	0.00897959	0.000429414	0.000401151
	GOTERM_BP_FAT	GO:0019221~cytokine-mediated signaling pathway	13	11.7117	3.83251e-06	ZBP1, CSF1R, CD74, KRT8, IL4RA, ISG15, IIGP1, IL17RA, CCL8, AXL, OAS3, SLIT3, GAS6	107	441	20010	5.51275	0.0140538	0.000643166	0.000600834
	GOTERM_BP_FAT	GO:0045595~regulation of cell differentiation	29	26.1261	6.56981e-06	ERRFI1, CSF1R, CEBPD, LRP1, GM12248, IL4RA, SOCS2, ZFP36, CCL8, MYC, WNT4, CD74, EGR2, OSR1, ISG15, MMD2, FOS, AGT, FBXO31, MYCL, MAFB, AXL, MYO5B, TMEM119, SIK1, GAS6, NBL1, PTPN5, C1QC	107	2186	20010	2.48091	0.0239704	0.0010546	0.000985185
	GOTERM_BP_FAT	GO:0002252~immune effector process	20	18.018	6.90725e-06	C1QB, ZBP1, H2-T23, C1QA, SPON2, CD74, H2-EB1, LRP1, PTAFR, HTRA1, IL4RA, TAP1, ISG15, CFP, C4B, AXL, OAS3, CTSH, C1QC, H2-AB1	107	1131	20010	3.30697	0.025186	0.00106256	0.000992629
	GOTERM_BP_FAT	GO:0032680~regulation of tumor necrosis factor production	9	8.10811	8.71747e-06	SPON2, H2-T23, ERRFI1, ZFP36, AXL, OAS3, PTAFR, GAS6, THBS1	107	193	20010	8.72064	0.0316811	0.0012874	0.00120266
	GOTERM_BP_FAT	GO:1903555~regulation of tumor necrosis factor superfamily cytokine production	9	8.10811	9.75662e-06	SPON2, H2-T23, ERRFI1, ZFP36, AXL, OAS3, PTAFR, GAS6, THBS1	107	196	20010	8.58716	0.03539	0.00138544	0.00129425
	GOTERM_BP_FAT	GO:0010942~positive regulation of cell death	16	14.4144	1.08597e-05	ZBP1, C1QA, PTGIS, LRP1, SP110, HTRA1, FOS, THBS1, AGT, SLC9A3R1, RPS29, MYC, CTSH, SIK1, SIGLEC1, PTPN5	107	758	20010	3.94743	0.0393117	0.00148497	0.00138723
	GOTERM_BP_FAT	GO:0070371~ERK1 and ERK2 cascade	11	9.90991	1.1928e-05	CSF1R, CD74, ERRFI1, SLC9A3R1, CCL8, LRP1, MYC, CTSH, GAS6, EZR, AGT	107	336	20010	6.12233	0.0430941	0.00154694	0.00144513
	GOTERM_BP_FAT	GO:0071706~tumor necrosis factor superfamily cytokine production	9	8.10811	1.2151e-05	SPON2, H2-T23, ERRFI1, ZFP36, AXL, OAS3, PTAFR, GAS6, THBS1	107	202	20010	8.3321	0.0438818	0.00154694	0.00144513
	GOTERM_BP_FAT	GO:0048585~negative regulation of response to stimulus	25	22.5225	1.46971e-05	H2-T23, ERRFI1, LRP1, IRS1, WWC1, HTRA1, IL4RA, THBS1, SOCS2, SLC9A3R1, ZFP36, SLIT3, WNT4, CD74, PTGIS, TAP1, ISG15, AGT, AXL, OAS3, EZR, PIK3AP1, GAS6, NBL1, PTPN5	107	1775	20010	2.63393	0.0528302	0.00180873	0.00168968
	GOTERM_BP_FAT	GO:0031347~regulation of defense response	16	14.4144	1.7662e-05	ZBP1, H2-T23, CD74, PLA2G2D, PTGIS, IFI213, HTRA1, IFI211, TAP1, ISG15, CTSS, AGT, IL17RA, ZFP36, OAS3, PIK3AP1	107	790	20010	3.78753	0.0631446	0.00210349	0.00196504
	GOTERM_BP_FAT	GO:0002504~antigen processing and presentation of peptide or polysaccharide antigen via MHC class II	5	4.5045	1.83342e-05	CD74, H2-EB1, THBS1, CTSS, H2-AB1	107	30	20010	31.1682	0.0654675	0.00211531	0.00197609
	GOTERM_BP_FAT	GO:0071495~cellular response to endogenous stimulus	22	19.8198	1.98474e-05	ERRFI1, LRP1, IRS1, PTAFR, HTRA1, FOS, ATP1A1, THBS1, RXFP1, CTSS, AGT, MTSS2, SOCS2, ANO1, ZFP36, MYC, CTSH, PGR, SLIT3, EZR, NBL1, WNT4	107	1447	20010	2.84327	0.0706754	0.0022205	0.00207435
	GOTERM_BP_FAT	GO:0032101~regulation of response to external stimulus	17	15.3153	2.38448e-05	ZBP1, H2-T23, CSF1R, CD74, PLA2G2D, PTGIS, LRP1, HTRA1, THBS1, CTSS, AGT, IL17RA, ZFP36, PIK3AP1, GAS6, NBL1, WNT4	107	912	20010	3.48592	0.0842939	0.00258926	0.00241884
	GOTERM_BP_FAT	GO:0050778~positive regulation of immune response	17	15.3153	2.51472e-05	C1QB, ZBP1, H2-T23, C1QA, SPON2, CD74, IFI213, PTAFR, IFI211, IL4RA, CFP, C4B, OAS3, PIK3AP1, EZR, C1QC, H2-AB1	107	916	20010	3.4707	0.088688	0.00260638	0.00243483
	GOTERM_BP_FAT	GO:0044764~multi-organism cellular process	15	13.5135	2.54143e-05	ZBP1, SPON2, CSF1R, CD74, HTRA1, ISG15, MPEG1, IL17RA, ZFP36, CCL8, AXL, OAS3, MYC, SIGLEC1, GAS6	107	717	20010	3.91233	0.0895864	0.00260638	0.00243483
	GOTERM_BP_FAT	GO:0023014~signal transduction by protein phosphorylation	16	14.4144	2.84067e-05	ERRFI1, CSF1R, CD74, LRP1, WWC1, THBS1, AGT, SLC9A3R1, ZFP36, CCL8, MYC, CTSH, IGFBP6, EZR, GAS6, PTPN5	107	823	20010	3.63566	0.0995923	0.00275994	0.00257829
	GOTERM_BP_FAT	GO:0000165~MAPK cascade	16	14.4144	2.84067e-05	ERRFI1, CSF1R, CD74, LRP1, WWC1, THBS1, AGT, SLC9A3R1, ZFP36, CCL8, MYC, CTSH, IGFBP6, EZR, GAS6, PTPN5	107	823	20010	3.63566	0.0995923	0.00275994	0.00257829
	GOTERM_BP_FAT	GO:0001819~positive regulation of cytokine production	13	11.7117	3.06292e-05	H2-T23, SPON2, CSF1R, CD74, LRP1, PTAFR, IFI211, IL4RA, ISG15, THBS1, AGT, IL17RA, OAS3	107	543	20010	4.4772	0.106952	0.00289956	0.00270872
	GOTERM_BP_FAT	GO:0006954~inflammatory response	15	13.5135	3.64315e-05	ZBP1, H2-T23, CSF1R, PLA2G2D, AHCY, PTGIS, PTAFR, IL4RA, THBS1, CTSS, IL17RA, C4B, ZFP36, CCL8, AXL	107	741	20010	3.78561	0.125886	0.00336263	0.00314131
	GOTERM_BP_FAT	GO:0042127~regulation of cell proliferation	25	22.5225	3.77232e-05	H2-T23, ERRFI1, CSF1R, IRS1, PTAFR, HTRA1, IL4RA, THBS1, RERG, SLC9A3R1, ZFP36, MYC, CCN5, CTSH, SLIT3, RSPO1, CD74, PLA2G2D, OSR1, AGT, TMEM119, PGR, FOLR2, GAS6, H2-AB1	107	1880	20010	2.48683	0.130046	0.00339693	0.00317335
	GOTERM_BP_FAT	GO:0045637~regulation of myeloid cell differentiation	9	8.10811	4.43536e-05	CSF1R, CD74, ZFP36, MAFB, GM12248, MYC, ISG15, FOS, C1QC	107	242	20010	6.95489	0.151089	0.0038627	0.00360846
	GOTERM_BP_FAT	GO:0007166~cell surface receptor signaling pathway	32	28.8288	4.49881e-05	ERRFI1, CSF1R, LRP1, IRS1, HTRA1, IL4RA, CPZ, THBS1, SOCS2, SLC9A3R1, CCL8, MYC, SLIT3, RSPO1, WNT4, ZBP1, CD74, KRT8, ISG15, FOS, AGT, IIGP1, IL17RA, ADGRD1, KRT19, AXL, OAS3, SIGLEC1, EZR, GAS6, NBL1, H2-AB1	107	2837	20010	2.10938	0.153076	0.0038627	0.00360846
	GOTERM_BP_FAT	GO:0030097~hemopoiesis	18	16.2162	4.81024e-05	CSF1R, CD74, PLA2G2D, CEBPD, GM12248, IL4RA, ISG15, STON2, FOS, ZFP36, MAFB, AXL, MYC, PRTN3, GAS6, C1QC, H2-AB1, WNT4	107	1075	20010	3.13132	0.162762	0.00397765	0.00371585
	GOTERM_BP_FAT	GO:0002520~immune system development	19	17.1171	4.84817e-05	H2-T23, CSF1R, CD74, PLA2G2D, CEBPD, GM12248, IL4RA, ISG15, STON2, FOS, ZFP36, MAFB, AXL, MYC, PRTN3, GAS6, C1QC, H2-AB1, WNT4	107	1187	20010	2.99341	0.163934	0.00397765	0.00371585
	GOTERM_BP_FAT	GO:0080134~regulation of response to stress	23	20.7207	5.24913e-05	ZBP1, H2-T23, ERRFI1, CD74, PLA2G2D, PTGIS, LRP1, IFI213, HTRA1, IFI211, TAP1, ISG15, THBS1, CTSS, AGT, IL17RA, ZFP36, OAS3, MYC, IGFBP6, PIK3AP1, EZR, WNT4	107	1668	20010	2.57867	0.176223	0.004213	0.00393571
	GOTERM_BP_FAT	GO:0010941~regulation of cell death	25	22.5225	5.79511e-05	C1QA, CSF1R, LRP1, HTRA1, THBS1, SLC9A3R1, ZFP36, MYC, CCN5, CTSH, WNT4, ZBP1, CD74, PTGIS, SP110, OSR1, FOS, AGT, RPS29, AXL, SIK1, PGR, SIGLEC1, GAS6, PTPN5	107	1931	20010	2.42115	0.192667	0.00446913	0.00417498
	GOTERM_BP_FAT	GO:1903706~regulation of hemopoiesis	12	10.8108	5.81036e-05	CSF1R, CD74, ZFP36, MAFB, AXL, GM12248, MYC, IL4RA, ISG15, FOS, GAS6, C1QC	107	490	20010	4.57982	0.193122	0.00446913	0.00417498
	GOTERM_BP_FAT	GO:0048002~antigen processing and presentation of peptide antigen	6	5.40541	6.26263e-05	H2-T23, CD74, H2-EB1, TAP1, CTSS, H2-AB1	107	79	20010	14.2032	0.206488	0.00467338	0.00436579
	GOTERM_BP_FAT	GO:0016477~cell migration	22	19.8198	6.32906e-05	CSF1R, CD74, LRP1, IRS1, WWC1, PTAFR, THBS1, AGT, FBXO31, IL17RA, CXCL16, SLC9A3R1, CCL8, AXL, MYC, CTSH, PGR, PRTN3, IGFBP6, GAS6, NBL1, WNT4	107	1566	20010	2.62721	0.208432	0.00467338	0.00436579
	GOTERM_BP_FAT	GO:0032640~tumor necrosis factor production	8	7.20721	6.65041e-05	SPON2, H2-T23, ERRFI1, AXL, OAS3, PTAFR, GAS6, THBS1	107	189	20010	7.91574	0.217771	0.00481437	0.0044975
	GOTERM_BP_FAT	GO:0019882~antigen processing and presentation	7	6.30631	7.62326e-05	H2-T23, CD74, H2-EB1, TAP1, THBS1, CTSS, H2-AB1	107	133	20010	9.8426	0.245378	0.00535391	0.00500153
	GOTERM_BP_FAT	GO:0030335~positive regulation of cell migration	13	11.7117	7.8709e-05	CSF1R, CD74, LRP1, IRS1, PTAFR, THBS1, AGT, FBXO31, CXCL16, MYC, CTSH, PGR, GAS6	107	599	20010	4.05863	0.252248	0.00535391	0.00500153
	GOTERM_BP_FAT	GO:0016032~viral process	14	12.6126	7.92979e-05	ZBP1, SPON2, CSF1R, CD74, HTRA1, ISG15, IL17RA, ZFP36, CCL8, AXL, OAS3, MYC, SIGLEC1, GAS6	107	696	20010	3.76168	0.253872	0.00535391	0.00500153
	GOTERM_BP_FAT	GO:0044419~interspecies interaction between organisms	15	13.5135	7.97576e-05	ZBP1, SPON2, CSF1R, CD74, CD209F, HTRA1, ISG15, IL17RA, ZFP36, CCL8, AXL, OAS3, MYC, SIGLEC1, GAS6	107	797	20010	3.51962	0.255138	0.00535391	0.00500153
	GOTERM_BP_FAT	GO:0048534~hematopoietic or lymphoid organ development	18	16.2162	8.42875e-05	CSF1R, CD74, PLA2G2D, CEBPD, GM12248, IL4RA, ISG15, STON2, FOS, ZFP36, MAFB, AXL, MYC, PRTN3, GAS6, C1QC, H2-AB1, WNT4	107	1125	20010	2.99215	0.267496	0.00555695	0.00519121
	GOTERM_BP_FAT	GO:0032870~cellular response to hormone stimulus	13	11.7117	8.78619e-05	ERRFI1, IRS1, FOS, ATP1A1, RXFP1, CTSS, AGT, SOCS2, ZFP36, MYC, CTSH, PGR, SLIT3	107	606	20010	4.01175	0.277103	0.00565799	0.00528559
	GOTERM_BP_FAT	GO:0032722~positive regulation of chemokine production	6	5.40541	8.88849e-05	CSF1R, CD74, LRP1, OAS3, IL4RA, IL17RA	107	85	20010	13.2007	0.279829	0.00565799	0.00528559
	GOTERM_BP_FAT	GO:0043583~ear development	9	8.10811	9.79252e-05	C1QB, H2-T23, MYCL, SLC9A3R1, MAFB, CEBPD, MYC, OSR1, RPL38	107	271	20010	6.21064	0.303478	0.00593487	0.00554424
	GOTERM_BP_FAT	GO:0010562~positive regulation of phosphorus metabolic process	19	17.1171	9.80571e-05	CSF1R, CD74, LRP1, IRS1, GM12248, WWC1, PTAFR, MMD2, THBS1, RXFP1, AGT, CCL8, AXL, MYC, TMEM119, RSPO1, IGFBP6, GAS6, PTPN5	107	1254	20010	2.83347	0.303817	0.00593487	0.00554424
	GOTERM_BP_FAT	GO:0045937~positive regulation of phosphate metabolic process	19	17.1171	9.80571e-05	CSF1R, CD74, LRP1, IRS1, GM12248, WWC1, PTAFR, MMD2, THBS1, RXFP1, AGT, CCL8, AXL, MYC, TMEM119, RSPO1, IGFBP6, GAS6, PTPN5	107	1254	20010	2.83347	0.303817	0.00593487	0.00554424
	GOTERM_BP_FAT	GO:0051146~striated muscle cell differentiation	10	9.00901	0.000100149	KRT19, CSRP2, CCL8, MYC, TMEM119, KRT8, IL4RA, SIK1, FLNC, AGT	107	349	20010	5.35843	0.309175	0.00596371	0.0055712
	GOTERM_BP_FAT	GO:0009725~response to hormone	16	14.4144	0.000106446	ERRFI1, EGR2, IRS1, PTAFR, FOS, ATP1A1, RXFP1, CTSS, AGT, RERG, SOCS2, ZFP36, MYC, CTSH, PGR, SLIT3	107	925	20010	3.23476	0.325055	0.00623805	0.00582747
	GOTERM_BP_FAT	GO:0001959~regulation of cytokine-mediated signaling pathway	7	6.30631	0.000109467	ZBP1, CD74, AXL, OAS3, ISG15, SLIT3, GAS6	107	142	20010	9.21877	0.332544	0.00631485	0.00589922
	GOTERM_BP_FAT	GO:2000147~positive regulation of cell motility	13	11.7117	0.000119249	CSF1R, CD74, LRP1, IRS1, PTAFR, THBS1, AGT, FBXO31, CXCL16, MYC, CTSH, PGR, GAS6	107	626	20010	3.88358	0.356229	0.00677333	0.00632752
	GOTERM_BP_FAT	GO:0009719~response to endogenous stimulus	24	21.6216	0.000128591	ERRFI1, EGR2, LRP1, IRS1, PTAFR, HTRA1, FOS, ATP1A1, THBS1, RXFP1, CTSS, AGT, RERG, MTSS2, SOCS2, ANO1, ZFP36, MYC, CTSH, PGR, SLIT3, EZR, NBL1, WNT4	107	1901	20010	2.36098	0.378063	0.00719329	0.00671984
	GOTERM_BP_FAT	GO:0008283~cell proliferation	26	23.4234	0.000134139	H2-T23, ERRFI1, CSF1R, LRP1, IRS1, PTAFR, HTRA1, THBS1, RERG, SLC9A3R1, ZFP36, MYC, CCN5, CTSH, SLIT3, RSPO1, WNT4, CD74, PLA2G2D, OSR1, AGT, TMEM119, PGR, FOLR2, GAS6, H2-AB1	107	2170	20010	2.24066	0.390679	0.00739168	0.00690517
	GOTERM_BP_FAT	GO:0060627~regulation of vesicle-mediated transport	13	11.7117	0.000142371	LRP1, PTAFR, IL4RA, STON2, CFP, C4B, AXL, MYO5B, PRTN3, RSPO1, EZR, GAS6, PTPN5	107	638	20010	3.81054	0.408925	0.00772989	0.00722112
	GOTERM_BP_FAT	GO:0019886~antigen processing and presentation of exogenous peptide antigen via MHC class II	4	3.6036	0.000154257	CD74, H2-EB1, CTSS, H2-AB1	107	20	20010	37.4019	0.434314	0.00816013	0.00762304
	GOTERM_BP_FAT	GO:0051272~positive regulation of cellular component movement	13	11.7117	0.00015756	CSF1R, CD74, LRP1, IRS1, PTAFR, THBS1, AGT, FBXO31, CXCL16, MYC, CTSH, PGR, GAS6	107	645	20010	3.76918	0.441173	0.00816013	0.00762304
	GOTERM_BP_FAT	GO:0060759~regulation of response to cytokine stimulus	7	6.30631	0.000158927	ZBP1, CD74, AXL, OAS3, ISG15, SLIT3, GAS6	107	152	20010	8.61227	0.443987	0.00816013	0.00762304
	GOTERM_BP_FAT	GO:0008219~cell death	27	24.3243	0.000159136	C1QA, CSF1R, LRP1, HTRA1, THBS1, SLC9A3R1, ZFP36, MYC, CCN5, CTSH, SLIT3, WNT4, ZBP1, CD74, PTGIS, SP110, OSR1, KRT8, FOS, AGT, RPS29, AXL, SIK1, PGR, SIGLEC1, GAS6, PTPN5	107	2329	20010	2.16799	0.444416	0.00816013	0.00762304
	GOTERM_BP_FAT	GO:0009968~negative regulation of signal transduction	19	17.1171	0.000164869	ERRFI1, CD74, LRP1, IRS1, WWC1, HTRA1, ISG15, THBS1, AGT, SOCS2, SLC9A3R1, OAS3, SLIT3, PIK3AP1, EZR, GAS6, NBL1, PTPN5, WNT4	107	1307	20010	2.71858	0.456058	0.00833832	0.00778951
	GOTERM_BP_FAT	GO:0051241~negative regulation of multicellular organismal process	20	18.018	0.000179745	ERRFI1, CD74, LRP1, WWC1, OSR1, IL4RA, ATP1A1, THBS1, AGT, SOCS2, ZFP36, MAFB, AXL, OAS3, MYC, TMEM119, EZR, GAS6, C1QC, WNT4	107	1437	20010	2.60277	0.48514	0.00896784	0.00837759
	GOTERM_BP_FAT	GO:0040017~positive regulation of locomotion	13	11.7117	0.000189478	CSF1R, CD74, LRP1, IRS1, PTAFR, THBS1, AGT, FBXO31, CXCL16, MYC, CTSH, PGR, GAS6	107	658	20010	3.69471	0.50332	0.00932739	0.00871348
	GOTERM_BP_FAT	GO:0002443~leukocyte mediated immunity	13	11.7117	0.000217657	C1QB, H2-T23, C1QA, SPON2, CD74, H2-EB1, PTAFR, IL4RA, TAP1, C4B, CTSH, C1QC, H2-AB1	107	668	20010	3.6394	0.552417	0.0105735	0.0098776
	GOTERM_BP_FAT	GO:0009966~regulation of signal transduction	32	28.8288	0.000231648	ERRFI1, CSF1R, LRP1, IRS1, WWC1, HTRA1, THBS1, SOCS2, SLC9A3R1, CCL8, CYTH4, MYC, CTSH, SLIT3, RSPO1, IGFBP6, WNT4, ZBP1, CD74, PTGIS, ISG15, MMD2, PTPN13, AGT, AXL, OAS3, SIGLEC1, EZR, PIK3AP1, GAS6, NBL1, PTPN5	107	3095	20010	1.93354	0.574961	0.0109911	0.0102677
	GOTERM_BP_FAT	GO:0048015~phosphatidylinositol-mediated signaling	7	6.30631	0.000232206	CSF1R, SLC9A3R1, IRS1, PTAFR, PIK3AP1, EZR, AGT	107	163	20010	8.03108	0.575836	0.0109911	0.0102677
	GOTERM_BP_FAT	GO:0044403~symbiosis, encompassing mutualism through parasitism	14	12.6126	0.000235324	ZBP1, SPON2, CSF1R, CD74, HTRA1, ISG15, IL17RA, ZFP36, CCL8, AXL, OAS3, MYC, SIGLEC1, GAS6	107	777	20010	3.36954	0.580694	0.0109977	0.0102738
	GOTERM_BP_FAT	GO:0050900~leukocyte migration	10	9.00901	0.000238933	CSF1R, CD74, CCL8, PTAFR, PRTN3, GAS6, THBS1, NBL1, CXCL16, IL17RA	107	392	20010	4.77065	0.586247	0.0110268	0.010301
	GOTERM_BP_FAT	GO:0048017~inositol lipid-mediated signaling	7	6.30631	0.000256205	CSF1R, SLC9A3R1, IRS1, PTAFR, PIK3AP1, EZR, AGT	107	166	20010	7.88594	0.61182	0.0116779	0.0109093
	GOTERM_BP_FAT	GO:0030595~leukocyte chemotaxis	8	7.20721	0.000262907	CSF1R, CD74, CCL8, GAS6, THBS1, NBL1, CXCL16, IL17RA	107	236	20010	6.3393	0.621312	0.0118372	0.0110581
	GOTERM_BP_FAT	GO:0002495~antigen processing and presentation of peptide antigen via MHC class II	4	3.6036	0.000269686	CD74, H2-EB1, CTSS, H2-AB1	107	24	20010	31.1682	0.630677	0.0119176	0.0111332
	GOTERM_BP_FAT	GO:0030334~regulation of cell migration	16	14.4144	0.000271147	CSF1R, CD74, LRP1, IRS1, PTAFR, THBS1, AGT, FBXO31, CXCL16, SLC9A3R1, MYC, CTSH, PGR, GAS6, NBL1, WNT4	107	1008	20010	2.9684	0.632665	0.0119176	0.0111332
	GOTERM_BP_FAT	GO:0019220~regulation of phosphate metabolic process	23	20.7207	0.000282704	ERRFI1, CSF1R, CD74, LRP1, IRS1, GM12248, WWC1, PTAFR, MMD2, PTPN13, THBS1, RXFP1, AGT, SLC9A3R1, CCL8, AXL, MYC, TMEM119, RSPO1, IGFBP6, EZR, GAS6, PTPN5	107	1873	20010	2.29643	0.648017	0.0120895	0.0112938
	GOTERM_BP_FAT	GO:0006928~movement of cell or subcellular component	26	23.4234	0.000284863	CSF1R, LRP1, IRS1, WWC1, PTAFR, ATP1A1, THBS1, CXCL16, SLC9A3R1, CCL8, MYC, CTSH, SLIT3, IGFBP6, WNT4, CD74, EGR2, AGT, FBXO31, IL17RA, AXL, MYO5B, PRTN3, PGR, GAS6, NBL1	107	2277	20010	2.13537	0.650814	0.0120895	0.0112938
	GOTERM_BP_FAT	GO:0002521~leukocyte differentiation	13	11.7117	0.000284882	CSF1R, CD74, PLA2G2D, IL4RA, FOS, MAFB, AXL, MYC, PRTN3, GAS6, C1QC, H2-AB1, WNT4	107	688	20010	3.53361	0.650838	0.0120895	0.0112938
	GOTERM_BP_FAT	GO:0051174~regulation of phosphorus metabolic process	23	20.7207	0.000293479	ERRFI1, CSF1R, CD74, LRP1, IRS1, GM12248, WWC1, PTAFR, MMD2, PTPN13, THBS1, RXFP1, AGT, SLC9A3R1, CCL8, AXL, MYC, TMEM119, RSPO1, IGFBP6, EZR, GAS6, PTPN5	107	1878	20010	2.29032	0.661752	0.0123128	0.0115024
	GOTERM_BP_FAT	GO:0009607~response to biotic stimulus	21	18.9189	0.000325036	ZBP1, H2-T23, SPON2, SP110, SLFN4, PTAFR, KRT8, HTRA1, IFI211, IL4RA, ISG15, FOS, MPEG1, IIGP1, IL17RA, CXCL16, ZFP36, CCL8, AXL, OAS3, MYC	107	1632	20010	2.40637	0.698972	0.0134835	0.0125961
	GOTERM_BP_FAT	GO:0032642~regulation of chemokine production	6	5.40541	0.000338318	CSF1R, CD74, LRP1, OAS3, IL4RA, IL17RA	107	113	20010	9.9297	0.713386	0.0138786	0.0129651
	GOTERM_BP_FAT	GO:0030100~regulation of endocytosis	9	8.10811	0.000344232	C4B, LRP1, AXL, PRTN3, STON2, RSPO1, GAS6, CFP, PTPN5	107	326	20010	5.16283	0.719581	0.013966	0.0130468
	GOTERM_BP_FAT	GO:0051049~regulation of transport	24	21.6216	0.000349427	CD74, LRP1, IRS1, OSR1, PTAFR, IL4RA, STON2, ATP1A1, CFP, THBS1, CTSS, AGT, C4B, ANO1, SLC9A3R1, AXL, MYC, MYO5B, PRTN3, SIK1, RSPO1, EZR, GAS6, PTPN5	107	2035	20010	2.20552	0.72491	0.0140226	0.0130997
	GOTERM_BP_FAT	GO:0042327~positive regulation of phosphorylation	17	15.3153	0.0003611	CSF1R, CD74, LRP1, IRS1, GM12248, WWC1, MMD2, THBS1, AGT, CCL8, AXL, MYC, TMEM119, RSPO1, IGFBP6, GAS6, PTPN5	107	1152	20010	2.75969	0.736521	0.0143353	0.0133918
	GOTERM_BP_FAT	GO:0032602~chemokine production	6	5.40541	0.000366843	CSF1R, CD74, LRP1, OAS3, IL4RA, IL17RA	107	115	20010	9.75701	0.742053	0.0144083	0.01346
	GOTERM_BP_FAT	GO:0051270~regulation of cellular component movement	17	15.3153	0.000393502	CSF1R, CD74, LRP1, IRS1, PTAFR, ATP1A1, THBS1, AGT, FBXO31, CXCL16, SLC9A3R1, MYC, CTSH, PGR, GAS6, NBL1, WNT4	107	1161	20010	2.73829	0.766247	0.0152927	0.0142862
	GOTERM_BP_FAT	GO:0007155~cell adhesion	20	18.018	0.000438347	H2-T23, SNED1, SPON2, CD74, H2-EB1, PLA2G2D, LRP1, PTAFR, IL4RA, THBS1, AGT, AXL, SPOCK2, CCN5, SIGLEC1, FOLR2, EZR, GAS6, H2-AB1, WNT4	107	1542	20010	2.42554	0.801937	0.0168581	0.0157485
	GOTERM_BP_FAT	GO:0040011~locomotion	24	21.6216	0.000448836	CSF1R, CD74, EGR2, LRP1, IRS1, WWC1, PTAFR, THBS1, AGT, FBXO31, IL17RA, CXCL16, SLC9A3R1, CCL8, AXL, MYC, CTSH, PGR, PRTN3, SLIT3, IGFBP6, GAS6, NBL1, WNT4	107	2071	20010	2.16718	0.809466	0.0170835	0.0159591
	GOTERM_BP_FAT	GO:0010646~regulation of cell communication	35	31.5315	0.000462726	ERRFI1, CSF1R, LRP1, IRS1, WWC1, HTRA1, THBS1, SOCS2, SLC9A3R1, CCL8, CYTH4, MYC, CTSH, SLIT3, RSPO1, IGFBP6, WNT4, ZBP1, CD74, EGR2, PTGIS, ISG15, MMD2, PTPN13, AGT, ANO1, AXL, OAS3, MYO5B, SIGLEC1, EZR, PIK3AP1, GAS6, NBL1, PTPN5	107	3670	20010	1.78347	0.818997	0.0174325	0.0162851
	GOTERM_BP_FAT	GO:0033993~response to lipid	17	15.3153	0.000483496	ERRFI1, SPON2, IRS1, OSR1, PTAFR, FOS, ATP1A1, THBS1, AGT, CXCL16, SOCS2, ZFP36, AXL, MYC, CTSH, PGR, SLIT3	107	1183	20010	2.68737	0.832368	0.0179543	0.0167726
	GOTERM_BP_FAT	GO:0022610~biological adhesion	20	18.018	0.000486303	H2-T23, SNED1, SPON2, CD74, H2-EB1, PLA2G2D, LRP1, PTAFR, IL4RA, THBS1, AGT, AXL, SPOCK2, CCN5, SIGLEC1, FOLR2, EZR, GAS6, H2-AB1, WNT4	107	1555	20010	2.40526	0.834097	0.0179543	0.0167726
	GOTERM_BP_FAT	GO:2000145~regulation of cell motility	16	14.4144	0.000504025	CSF1R, CD74, LRP1, IRS1, PTAFR, THBS1, AGT, FBXO31, CXCL16, SLC9A3R1, MYC, CTSH, PGR, GAS6, NBL1, WNT4	107	1069	20010	2.79902	0.844612	0.0182218	0.0170225
	GOTERM_BP_FAT	GO:0051674~localization of cell	22	19.8198	0.00051301	CSF1R, CD74, LRP1, IRS1, WWC1, PTAFR, THBS1, AGT, FBXO31, IL17RA, CXCL16, SLC9A3R1, CCL8, AXL, MYC, CTSH, PGR, PRTN3, IGFBP6, GAS6, NBL1, WNT4	107	1822	20010	2.25807	0.849687	0.0182218	0.0170225
	GOTERM_BP_FAT	GO:0048870~cell motility	22	19.8198	0.00051301	CSF1R, CD74, LRP1, IRS1, WWC1, PTAFR, THBS1, AGT, FBXO31, IL17RA, CXCL16, SLC9A3R1, CCL8, AXL, MYC, CTSH, PGR, PRTN3, IGFBP6, GAS6, NBL1, WNT4	107	1822	20010	2.25807	0.849687	0.0182218	0.0170225
	GOTERM_BP_FAT	GO:0016064~immunoglobulin mediated immune response	9	8.10811	0.000520562	C1QB, C4B, H2-T23, C1QA, CD74, H2-EB1, IL4RA, H2-AB1, C1QC	107	347	20010	4.85039	0.853823	0.0182218	0.0170225
	GOTERM_BP_FAT	GO:0042325~regulation of phosphorylation	21	18.9189	0.000521701	ERRFI1, CSF1R, CD74, LRP1, IRS1, GM12248, WWC1, MMD2, PTPN13, THBS1, AGT, SLC9A3R1, CCL8, AXL, MYC, TMEM119, RSPO1, IGFBP6, EZR, GAS6, PTPN5	107	1693	20010	2.31967	0.854437	0.0182218	0.0170225
	GOTERM_BP_FAT	GO:0023051~regulation of signaling	35	31.5315	0.000523161	ERRFI1, CSF1R, LRP1, IRS1, WWC1, HTRA1, THBS1, SOCS2, SLC9A3R1, CCL8, CYTH4, MYC, CTSH, SLIT3, RSPO1, IGFBP6, WNT4, ZBP1, CD74, EGR2, PTGIS, ISG15, MMD2, PTPN13, AGT, ANO1, AXL, OAS3, MYO5B, SIGLEC1, EZR, PIK3AP1, GAS6, NBL1, PTPN5	107	3694	20010	1.77188	0.85522	0.0182218	0.0170225
	GOTERM_BP_FAT	GO:0051707~response to other organism	20	18.018	0.000543005	ZBP1, H2-T23, SPON2, SP110, SLFN4, PTAFR, KRT8, HTRA1, IFI211, IL4RA, ISG15, FOS, MPEG1, IIGP1, IL17RA, CXCL16, ZFP36, CCL8, AXL, OAS3	107	1569	20010	2.3838	0.865456	0.0186573	0.0174293
	GOTERM_BP_FAT	GO:0042692~muscle cell differentiation	11	9.90991	0.000549976	KRT19, CSRP2, CCL8, MYC, TMEM119, KRT8, IL4RA, SIK1, FLNC, AGT, WNT4	107	535	20010	3.84505	0.868877	0.0186573	0.0174293
	GOTERM_BP_FAT	GO:1903708~positive regulation of hemopoiesis	8	7.20721	0.000551576	CSF1R, CD74, AXL, GM12248, IL4RA, ISG15, FOS, GAS6	107	267	20010	5.60328	0.86965	0.0186573	0.0174293
	GOTERM_BP_FAT	GO:0043207~response to external biotic stimulus	20	18.018	0.000555878	ZBP1, H2-T23, SPON2, SP110, SLFN4, PTAFR, KRT8, HTRA1, IFI211, IL4RA, ISG15, FOS, MPEG1, IIGP1, IL17RA, CXCL16, ZFP36, CCL8, AXL, OAS3	107	1572	20010	2.37925	0.871706	0.0186573	0.0174293
	GOTERM_BP_FAT	GO:0019724~B cell mediated immunity	9	8.10811	0.000571829	C1QB, C4B, H2-T23, C1QA, CD74, H2-EB1, IL4RA, H2-AB1, C1QC	107	352	20010	4.78149	0.879049	0.0190198	0.0177679
	GOTERM_BP_FAT	GO:0006935~chemotaxis	12	10.8108	0.000598689	CSF1R, CD74, EGR2, CCL8, LRP1, PTAFR, SLIT3, GAS6, THBS1, NBL1, CXCL16, IL17RA	107	642	20010	3.4955	0.890477	0.0197353	0.0184364
	GOTERM_BP_FAT	GO:0043085~positive regulation of catalytic activity	17	15.3153	0.000606829	CSF1R, CD74, IRS1, PTAFR, MMD2, THBS1, RXFP1, AGT, MTSS2, CCL8, AXL, MYC, CTSH, PRTN3, IGFBP6, GAS6, WNT4	107	1208	20010	2.63175	0.893722	0.0198267	0.0185217
	GOTERM_BP_FAT	GO:0010648~negative regulation of cell communication	19	17.1171	0.000613317	ERRFI1, CD74, LRP1, IRS1, WWC1, HTRA1, ISG15, THBS1, AGT, SOCS2, SLC9A3R1, OAS3, SLIT3, PIK3AP1, EZR, GAS6, NBL1, PTPN5, WNT4	107	1457	20010	2.43869	0.89624	0.0198629	0.0185555
	GOTERM_BP_FAT	GO:0023057~negative regulation of signaling	19	17.1171	0.000633365	ERRFI1, CD74, LRP1, IRS1, WWC1, HTRA1, ISG15, THBS1, AGT, SOCS2, SLC9A3R1, OAS3, SLIT3, PIK3AP1, EZR, GAS6, NBL1, PTPN5, WNT4	107	1461	20010	2.43202	0.903649	0.020316	0.0189788
	GOTERM_BP_FAT	GO:0042330~taxis	12	10.8108	0.000638314	CSF1R, CD74, EGR2, CCL8, LRP1, PTAFR, SLIT3, GAS6, THBS1, NBL1, CXCL16, IL17RA	107	647	20010	3.46849	0.905395	0.020316	0.0189788
	GOTERM_BP_FAT	GO:0050790~regulation of catalytic activity	23	20.7207	0.000651304	ERRFI1, CSF1R, CD74, LRP1, IRS1, PTAFR, MMD2, THBS1, RXFP1, AGT, MTSS2, SLC9A3R1, ZFP36, CCL8, AXL, OAS3, MYC, CTSH, PRTN3, IGFBP6, GAS6, PTPN5, WNT4	107	1990	20010	2.16141	0.909829	0.0204208	0.0190767
	GOTERM_BP_FAT	GO:0002449~lymphocyte mediated immunity	11	9.90991	0.000652668	C1QB, C4B, H2-T23, C1QA, CD74, H2-EB1, IL4RA, TAP1, CTSH, H2-AB1, C1QC	107	547	20010	3.7607	0.910282	0.0204208	0.0190767
	GOTERM_BP_FAT	GO:0042981~regulation of apoptotic process	21	18.9189	0.000666346	ZBP1, CSF1R, CD74, PTGIS, LRP1, SP110, OSR1, HTRA1, THBS1, AGT, SLC9A3R1, ZFP36, RPS29, AXL, MYC, CTSH, PGR, SIK1, SIGLEC1, GAS6, WNT4	107	1726	20010	2.27532	0.914705	0.0206517	0.0192924
	GOTERM_BP_FAT	GO:0048608~reproductive structure development	11	9.90991	0.000671235	KRT19, PTGIS, AXL, MYC, OSR1, KRT8, HTRA1, SLIT3, PGR, AGT, WNT4	107	549	20010	3.747	0.916232	0.0206517	0.0192924
	GOTERM_BP_FAT	GO:1902105~regulation of leukocyte differentiation	9	8.10811	0.000686645	CSF1R, CD74, MAFB, AXL, MYC, IL4RA, FOS, GAS6, C1QC	107	362	20010	4.6494	0.920869	0.0209512	0.0195722
	GOTERM_BP_FAT	GO:1903959~regulation of anion transmembrane transport	4	3.6036	0.000702239	OSR1, PTAFR, THBS1, AGT	107	33	20010	22.6678	0.9253	0.0211302	0.0197395
	GOTERM_BP_FAT	GO:0006468~protein phosphorylation	23	20.7207	0.000706248	ERRFI1, CSF1R, CD74, LRP1, GM12248, WWC1, MMD2, PTPN13, THBS1, AGT, SLC9A3R1, ZFP36, CCL8, AXL, MYC, TMEM119, CTSH, SIK1, RSPO1, IGFBP6, EZR, GAS6, PTPN5	107	2002	20010	2.14846	0.926399	0.0211302	0.0197395
	GOTERM_BP_FAT	GO:0002460~adaptive immune response based on somatic recombination of immune receptors built from immunoglobulin superfamily domains	11	9.90991	0.000709683	C1QB, C4B, H2-T23, C1QA, CD74, H2-EB1, IL4RA, CTSH, H2-AB1, C1QC, IL17RA	107	553	20010	3.7199	0.927327	0.0211302	0.0197395
	GOTERM_BP_FAT	GO:0061458~reproductive system development	11	9.90991	0.000719574	KRT19, PTGIS, AXL, MYC, OSR1, KRT8, HTRA1, SLIT3, PGR, AGT, WNT4	107	554	20010	3.71318	0.929936	0.0212533	0.0198545
	GOTERM_BP_FAT	GO:0030099~myeloid cell differentiation	10	9.00901	0.000759832	CSF1R, CD74, ZFP36, MAFB, GM12248, MYC, PRTN3, ISG15, FOS, C1QC	107	460	20010	4.06542	0.939622	0.0219885	0.0205413
	GOTERM_BP_FAT	GO:0002253~activation of immune response	12	10.8108	0.000761096	C1QB, ZBP1, C4B, C1QA, OAS3, IFI213, IFI211, PIK3AP1, CFP, EZR, H2-AB1, C1QC	107	661	20010	3.39503	0.939903	0.0219885	0.0205413
	GOTERM_BP_FAT	GO:0098883~synapse disassembly	3	2.7027	0.000762332	C1QB, C1QA, C1QC	107	8	20010	70.1285	0.940177	0.0219885	0.0205413
	GOTERM_BP_FAT	GO:0006915~apoptotic process	23	20.7207	0.000780593	ZBP1, CSF1R, CD74, PTGIS, LRP1, SP110, OSR1, KRT8, HTRA1, THBS1, AGT, SLC9A3R1, ZFP36, RPS29, AXL, MYC, CTSH, PGR, SLIT3, SIK1, SIGLEC1, GAS6, WNT4	107	2017	20010	2.13248	0.944081	0.0223407	0.0208703
	GOTERM_BP_FAT	GO:0043067~regulation of programmed cell death	21	18.9189	0.000792383	ZBP1, CSF1R, CD74, PTGIS, LRP1, SP110, OSR1, HTRA1, THBS1, AGT, SLC9A3R1, ZFP36, RPS29, AXL, MYC, CTSH, PGR, SIK1, SIGLEC1, GAS6, WNT4	107	1750	20010	2.24411	0.946466	0.0225037	0.0210225
	GOTERM_BP_FAT	GO:0002250~adaptive immune response	13	11.7117	0.000820599	C1QB, H2-T23, C1QA, CD74, H2-EB1, IL4RA, TAP1, CTSS, IL17RA, C4B, CTSH, C1QC, H2-AB1	107	775	20010	3.13693	0.951767	0.0229957	0.0214821
	GOTERM_BP_FAT	GO:0006897~endocytosis	14	12.6126	0.000822164	SPON2, LRP1, STON2, CFP, THBS1, CXCL16, C4B, AXL, PRTN3, SIGLEC1, RSPO1, EZR, GAS6, PTPN5	107	887	20010	2.95167	0.952045	0.0229957	0.0214821
	GOTERM_BP_FAT	GO:0032103~positive regulation of response to external stimulus	9	8.10811	0.000863027	ZBP1, H2-T23, CSF1R, CD74, LRP1, GAS6, THBS1, CTSS, IL17RA	107	375	20010	4.48822	0.958768	0.0239571	0.0223803
	GOTERM_BP_FAT	GO:0043408~regulation of MAPK cascade	13	11.7117	0.00088712	ERRFI1, CSF1R, CD74, LRP1, WWC1, THBS1, AGT, SLC9A3R1, CCL8, IGFBP6, EZR, GAS6, PTPN5	107	782	20010	3.10885	0.962281	0.0244421	0.0228334
	GOTERM_BP_FAT	GO:0048771~tissue remodeling	7	6.30631	0.000910094	CSF1R, LRP1, AXL, TMEM119, P3H4, CTSS, AGT	107	211	20010	6.2041	0.965352	0.0248894	0.0232512
	GOTERM_BP_FAT	GO:0061061~muscle structure development	13	11.7117	0.000927118	EGR2, KRT8, IL4RA, FOS, AGT, KRT19, CSRP2, CCL8, MYC, TMEM119, SIK1, FLNC, WNT4	107	786	20010	3.09303	0.967465	0.0251685	0.023512
	GOTERM_BP_FAT	GO:0043065~positive regulation of apoptotic process	12	10.8108	0.000970152	ZBP1, SLC9A3R1, PTGIS, SP110, RPS29, MYC, HTRA1, CTSH, SIK1, SIGLEC1, THBS1, AGT	107	681	20010	3.29532	0.97225	0.0261445	0.0244238
	GOTERM_BP_FAT	GO:0051338~regulation of transferase activity	14	12.6126	0.000998131	ERRFI1, CSF1R, CD74, IRS1, MMD2, THBS1, AGT, SLC9A3R1, ZFP36, AXL, MYC, IGFBP6, GAS6, PTPN5	107	906	20010	2.88977	0.974977	0.0266997	0.0249424
	GOTERM_BP_FAT	GO:0045088~regulation of innate immune response	9	8.10811	0.00100522	ZBP1, H2-T23, CD74, OAS3, IFI213, IFI211, TAP1, ISG15, PIK3AP1	107	384	20010	4.38303	0.975623	0.0266997	0.0249424
	GOTERM_BP_FAT	GO:0043068~positive regulation of programmed cell death	12	10.8108	0.00102926	ZBP1, SLC9A3R1, PTGIS, SP110, RPS29, MYC, HTRA1, CTSH, SIK1, SIGLEC1, THBS1, AGT	107	686	20010	3.2713	0.977697	0.0271432	0.0253567
	GOTERM_BP_FAT	GO:0046903~secretion	16	14.4144	0.0011017	CD74, PLA2G2D, LRP1, IRS1, PTAFR, IL4RA, AQP5, AGT, SOCS2, ANO1, SLC9A3R1, CCL8, AXL, MYC, MYO5B, EZR	107	1154	20010	2.59285	0.982937	0.0288474	0.0269488
	GOTERM_BP_FAT	GO:0040012~regulation of locomotion	16	14.4144	0.00111131	CSF1R, CD74, LRP1, IRS1, PTAFR, THBS1, AGT, FBXO31, CXCL16, SLC9A3R1, MYC, CTSH, PGR, GAS6, NBL1, WNT4	107	1155	20010	2.59061	0.983532	0.0288941	0.0269923
	GOTERM_BP_FAT	GO:0043900~regulation of multi-organism process	10	9.00901	0.00114992	CSF1R, CD74, ZFP36, CCL8, AXL, OAS3, PTAFR, HTRA1, ISG15, RSPO1	107	488	20010	3.83216	0.985723	0.0295156	0.027573
	GOTERM_BP_FAT	GO:0002761~regulation of myeloid leukocyte differentiation	6	5.40541	0.00115121	CSF1R, CD74, MAFB, MYC, FOS, C1QC	107	148	20010	7.58146	0.985791	0.0295156	0.027573
	GOTERM_BP_FAT	GO:0050792~regulation of viral process	8	7.20721	0.00129436	CSF1R, CD74, ZFP36, CCL8, AXL, OAS3, HTRA1, ISG15	107	309	20010	4.84167	0.991631	0.0329571	0.0307879
	GOTERM_BP_FAT	GO:0016310~phosphorylation	25	22.5225	0.00140343	ERRFI1, CSF1R, LRP1, IRS1, WWC1, GM12248, THBS1, SOCS2, SLC9A3R1, ZFP36, CCL8, MYC, CTSH, RSPO1, IGFBP6, CD74, MMD2, PTPN13, AGT, AXL, TMEM119, SIK1, EZR, GAS6, PTPN5	107	2392	20010	1.95453	0.994409	0.0353844	0.0330554
	GOTERM_BP_FAT	GO:0009967~positive regulation of signal transduction	20	18.018	0.00140886	ZBP1, CSF1R, CD74, PTGIS, LRP1, IRS1, WWC1, MMD2, THBS1, AGT, SLC9A3R1, CCL8, AXL, MYC, CTSH, SIGLEC1, RSPO1, IGFBP6, PIK3AP1, GAS6	107	1699	20010	2.2014	0.99452	0.0353844	0.0330554
	GOTERM_BP_FAT	GO:0035556~intracellular signal transduction	27	24.3243	0.00145152	ERRFI1, CSF1R, LRP1, IRS1, WWC1, PTAFR, THBS1, RERG, SOCS2, SLC9A3R1, ZFP36, CCL8, CYTH4, MYC, CTSH, IGFBP6, CD74, MMD2, PTPN13, AGT, AXL, OAS3, SIK1, EZR, PIK3AP1, GAS6, PTPN5	107	2688	20010	1.87844	0.995319	0.0360261	0.0336549
	GOTERM_BP_FAT	GO:0048525~negative regulation of viral process	6	5.40541	0.00145392	CD74, ZFP36, CCL8, OAS3, HTRA1, ISG15	107	156	20010	7.19267	0.995361	0.0360261	0.0336549
	GOTERM_BP_FAT	GO:0009887~animal organ morphogenesis	16	14.4144	0.00147069	ERRFI1, OSR1, HTRA1, AQP5, THBS1, AGT, SLC9A3R1, MAFB, MYC, TMEM119, CTSH, PGR, SLIT3, RPL38, NBL1, WNT4	107	1188	20010	2.51864	0.99564	0.0361986	0.033816
	GOTERM_BP_FAT	GO:0034341~response to interferon-gamma	6	5.40541	0.00153798	CD74, H2-EB1, CCL8, MYC, H2-AB1, CXCL16	107	158	20010	7.10162	0.996601	0.0376041	0.0351291
	GOTERM_BP_FAT	GO:0060326~cell chemotaxis	8	7.20721	0.00166711	CSF1R, CD74, CCL8, GAS6, THBS1, NBL1, CXCL16, IL17RA	107	323	20010	4.63181	0.997891	0.0404931	0.0378279
	GOTERM_BP_FAT	GO:0012501~programmed cell death	23	20.7207	0.00172473	ZBP1, CSF1R, CD74, PTGIS, LRP1, SP110, OSR1, KRT8, HTRA1, THBS1, AGT, SLC9A3R1, ZFP36, RPS29, AXL, MYC, CTSH, PGR, SLIT3, SIK1, SIGLEC1, GAS6, WNT4	107	2143	20010	2.0071	0.998296	0.0416189	0.0388796
	GOTERM_BP_FAT	GO:0050727~regulation of inflammatory response	9	8.10811	0.00174658	ZBP1, H2-T23, ZFP36, PLA2G2D, PTGIS, PIK3AP1, CTSS, AGT, IL17RA	107	419	20010	4.01691	0.998429	0.0418726	0.0391166
	GOTERM_BP_FAT	GO:0043903~regulation of symbiosis, encompassing mutualism through parasitism	8	7.20721	0.00178763	CSF1R, CD74, ZFP36, CCL8, AXL, OAS3, HTRA1, ISG15	107	327	20010	4.57515	0.99865	0.0424898	0.0396932
	GOTERM_BP_FAT	GO:0034612~response to tumor necrosis factor	7	6.30631	0.00179534	ZFP36, CCL8, KRT8, GAS6, AFF3, THBS1, CXCL16	107	241	20010	5.43181	0.998688	0.0424898	0.0396932
	GOTERM_BP_FAT	GO:0065009~regulation of molecular function	27	24.3243	0.00182563	ERRFI1, CSF1R, LRP1, IRS1, PTAFR, THBS1, RXFP1, CTSS, SLC9A3R1, ZFP36, CCL8, MYC, CTSH, IGFBP6, WNT4, CD74, PTGIS, OSR1, MMD2, AGT, MTSS2, AXL, OAS3, PRTN3, SIK1, GAS6, PTPN5	107	2731	20010	1.84887	0.998827	0.0429314	0.0401058
	GOTERM_BP_FAT	GO:0051701~interaction with host	6	5.40541	0.00186051	CD74, CCL8, AXL, MYC, SIGLEC1, GAS6	107	165	20010	6.80034	0.998969	0.0434747	0.0406133
	GOTERM_BP_FAT	GO:0007167~enzyme linked receptor protein signaling pathway	14	12.6126	0.00189133	ERRFI1, CSF1R, LRP1, IRS1, HTRA1, FOS, THBS1, AGT, SOCS2, SLC9A3R1, AXL, GAS6, NBL1, WNT4	107	973	20010	2.69078	0.99908	0.0439169	0.0410264
	GOTERM_BP_FAT	GO:0097530~granulocyte migration	6	5.40541	0.00191033	CSF1R, CD74, CCL8, PRTN3, THBS1, IL17RA	107	166	20010	6.75937	0.999143	0.0440809	0.0411796
	GOTERM_BP_FAT	GO:0071363~cellular response to growth factor stimulus	12	10.8108	0.0019411	ERRFI1, ZFP36, LRP1, MYC, HTRA1, FOS, GAS6, THBS1, NBL1, AGT, WNT4, MTSS2	107	743	20010	3.02034	0.999235	0.0444507	0.041525
	GOTERM_BP_FAT	GO:0097529~myeloid leukocyte migration	7	6.30631	0.00195043	CSF1R, CD74, CCL8, PRTN3, THBS1, NBL1, IL17RA	107	245	20010	5.34312	0.999261	0.0444507	0.041525
	GOTERM_BP_FAT	GO:0044093~positive regulation of molecular function	19	17.1171	0.00196703	CSF1R, CD74, LRP1, IRS1, PTAFR, MMD2, THBS1, RXFP1, CTSS, AGT, MTSS2, CCL8, AXL, MYC, CTSH, PRTN3, IGFBP6, GAS6, WNT4	107	1614	20010	2.20147	0.999305	0.0445538	0.0416214
	GOTERM_BP_FAT	GO:0043277~apoptotic cell clearance	4	3.6036	0.00210166	LRP1, AXL, GAS6, THBS1	107	48	20010	15.5841	0.999578	0.0473131	0.044199
	GOTERM_BP_FAT	GO:0046660~female sex differentiation	6	5.40541	0.00211944	AXL, MYC, SLIT3, PGR, AGT, WNT4	107	170	20010	6.60033	0.999605	0.0473955	0.044276
	GOTERM_BP_FAT	GO:0002697~regulation of immune effector process	10	9.00901	0.002131	C4B, SPON2, H2-T23, CD74, AXL, PTAFR, HTRA1, IL4RA, TAP1, CFP	107	534	20010	3.50205	0.999621	0.0473955	0.044276
	GOTERM_BP_FAT	GO:0070372~regulation of ERK1 and ERK2 cascade	8	7.20721	0.00219023	CSF1R, CD74, ERRFI1, SLC9A3R1, CCL8, LRP1, GAS6, EZR	107	339	20010	4.4132	0.999696	0.0484212	0.0452342
	GOTERM_BP_FAT	GO:0008284~positive regulation of cell proliferation	15	13.5135	0.00220939	H2-T23, CSF1R, CD74, IRS1, OSR1, PTAFR, HTRA1, THBS1, AGT, MYC, TMEM119, CTSH, PGR, FOLR2, GAS6	107	1113	20010	2.52034	0.999716	0.0484235	0.0452364
	GOTERM_BP_FAT	GO:0045214~sarcomere organization	4	3.6036	0.00223017	KRT19, CSRP2, KRT8, FLNC	107	49	20010	15.2661	0.999737	0.0484235	0.0452364
	GOTERM_BP_FAT	GO:0030501~positive regulation of bone mineralization	4	3.6036	0.00223017	OSR1, TMEM119, ISG15, WNT4	107	49	20010	15.2661	0.999737	0.0484235	0.0452364
	GOTERM_BP_FAT	GO:0001775~cell activation	17	15.3153	0.0022428	H2-T23, C1QA, CD74, H2-EB1, PLA2G2D, LRP1, PTAFR, IL4RA, THBS1, AGT, IL17RA, MAFB, AXL, MYC, GAS6, H2-AB1, WNT4	107	1369	20010	2.32225	0.999749	0.0484235	0.0452364
	GOTERM_BP_FAT	GO:0006796~phosphate-containing compound metabolic process	30	27.027	0.0022569	ERRFI1, CSF1R, LRP1, PLPPR3, IRS1, WWC1, GM12248, PTAFR, THBS1, RXFP1, SOCS2, SLC9A3R1, ZFP36, CCL8, MYC, CTSH, RSPO1, IGFBP6, CD74, PLA2G2D, MMD2, PTPN13, AGT, AXL, OAS3, TMEM119, SIK1, EZR, GAS6, PTPN5	107	3225	20010	1.73962	0.999762	0.0484446	0.045256
	GOTERM_BP_FAT	GO:0002573~myeloid leukocyte differentiation	7	6.30631	0.00229087	CSF1R, CD74, MAFB, MYC, PRTN3, FOS, C1QC	107	253	20010	5.17417	0.99979	0.0488896	0.0456718
	GOTERM_BP_FAT	GO:0051050~positive regulation of transport	15	13.5135	0.0023402	LRP1, IRS1, PTAFR, IL4RA, CFP, CTSS, AGT, C4B, ANO1, SLC9A3R1, AXL, MYO5B, EZR, GAS6, PTPN5	107	1120	20010	2.50459	0.999825	0.0494685	0.0462126
	GOTERM_BP_FAT	GO:1903707~negative regulation of hemopoiesis	6	5.40541	0.0023448	CD74, ZFP36, MAFB, MYC, IL4RA, C1QC	107	174	20010	6.4486	0.999828	0.0494685	0.0462126
	GOTERM_BP_FAT	GO:0010647~positive regulation of cell communication	22	19.8198	0.00237487	ZBP1, CSF1R, CD74, PTGIS, LRP1, IRS1, WWC1, MMD2, THBS1, AGT, ANO1, SLC9A3R1, CCL8, AXL, MYC, CTSH, SIGLEC1, RSPO1, IGFBP6, PIK3AP1, GAS6, PTPN5	107	2056	20010	2.00107	0.999846	0.0498182	0.0465393
	GOTERM_BP_FAT	GO:0072075~metanephric mesenchyme development	3	2.7027	0.00242668	MYC, OSR1, WNT4	107	14	20010	40.0734	0.999873	0.0506176	0.047286
	GOTERM_BP_FAT	GO:0019058~viral life cycle	8	7.20721	0.00245553	CD74, ZFP36, CCL8, AXL, OAS3, ISG15, SIGLEC1, GAS6	107	346	20010	4.32392	0.999886	0.0509315	0.0475793
	GOTERM_BP_FAT	GO:0031348~negative regulation of defense response	7	6.30631	0.00247703	H2-T23, ZFP36, PTGIS, OAS3, HTRA1, TAP1, ISG15	107	257	20010	5.09364	0.999895	0.0510267	0.0476682
	GOTERM_BP_FAT	GO:0023056~positive regulation of signaling	22	19.8198	0.00248922	ZBP1, CSF1R, CD74, PTGIS, LRP1, IRS1, WWC1, MMD2, THBS1, AGT, ANO1, SLC9A3R1, CCL8, AXL, MYC, CTSH, SIGLEC1, RSPO1, IGFBP6, PIK3AP1, GAS6, PTPN5	107	2064	20010	1.99332	0.999899	0.0510267	0.0476682
	GOTERM_BP_FAT	GO:0010934~macrophage cytokine production	4	3.6036	0.00250158	SPON2, CD74, AXL, GAS6	107	51	20010	14.6674	0.999904	0.0510267	0.0476682
	GOTERM_BP_FAT	GO:0070848~response to growth factor	12	10.8108	0.0026383	ERRFI1, ZFP36, LRP1, MYC, HTRA1, FOS, GAS6, THBS1, NBL1, AGT, WNT4, MTSS2	107	773	20010	2.90312	0.999942	0.0535197	0.0499971
	GOTERM_BP_FAT	GO:0070167~regulation of biomineral tissue development	5	4.5045	0.00270256	OSR1, TMEM119, ISG15, GAS6, WNT4	107	109	20010	8.57841	0.999954	0.0545237	0.0509351
	GOTERM_BP_FAT	GO:0031349~positive regulation of defense response	9	8.10811	0.00298459	ZBP1, H2-T23, CD74, OAS3, IFI213, IFI211, PIK3AP1, CTSS, IL17RA	107	457	20010	3.6829	0.999984	0.0598235	0.055886
	GOTERM_BP_FAT	GO:0043549~regulation of kinase activity	12	10.8108	0.00299765	CSF1R, CD74, ERRFI1, SLC9A3R1, AXL, IRS1, MMD2, IGFBP6, GAS6, THBS1, PTPN5, AGT	107	786	20010	2.8551	0.999985	0.0598235	0.055886
	GOTERM_BP_FAT	GO:0090288~negative regulation of cellular response to growth factor stimulus	6	5.40541	0.00305421	LRP1, HTRA1, THBS1, NBL1, AGT, WNT4	107	185	20010	6.06517	0.999988	0.0605073	0.0565249
	GOTERM_BP_FAT	GO:0001932~regulation of protein phosphorylation	18	16.2162	0.00307049	ERRFI1, CSF1R, CD74, LRP1, GM12248, WWC1, MMD2, PTPN13, THBS1, AGT, SLC9A3R1, CCL8, TMEM119, RSPO1, IGFBP6, EZR, GAS6, PTPN5	107	1546	20010	2.17734	0.999988	0.0605073	0.0565249
	GOTERM_BP_FAT	GO:1901700~response to oxygen-containing compound	22	19.8198	0.00308109	ERRFI1, SPON2, EGR2, LRP1, IRS1, OSR1, PTAFR, KRT8, FOS, THBS1, AGT, CXCL16, SOCS2, ANO1, ZFP36, AXL, MYC, CTSH, PGR, SLIT3, EZR, GAS6	107	2101	20010	1.95821	0.999989	0.0605073	0.0565249
	GOTERM_BP_FAT	GO:0007159~leukocyte cell-cell adhesion	9	8.10811	0.00323067	H2-T23, CD74, H2-EB1, PLA2G2D, PTAFR, IL4RA, EZR, THBS1, H2-AB1	107	463	20010	3.63517	0.999994	0.0631092	0.0589555
	GOTERM_BP_FAT	GO:0001961~positive regulation of cytokine-mediated signaling pathway	4	3.6036	0.00326676	ZBP1, CD74, AXL, GAS6	107	56	20010	13.3578	0.999994	0.0632463	0.0590836
	GOTERM_BP_FAT	GO:2001235~positive regulation of apoptotic signaling pathway	6	5.40541	0.00327195	SLC9A3R1, MYC, CTSH, SIGLEC1, THBS1, AGT	107	188	20010	5.96838	0.999994	0.0632463	0.0590836
	GOTERM_BP_FAT	GO:0032844~regulation of homeostatic process	10	9.00901	0.00329198	CSF1R, CD74, ANO1, ZFP36, MAFB, LRP1, MYC, TMEM119, ISG15, AGT	107	570	20010	3.28087	0.999995	0.0633019	0.0591355
	GOTERM_BP_FAT	GO:0006793~phosphorus metabolic process	30	27.027	0.00332853	ERRFI1, CSF1R, LRP1, PLPPR3, IRS1, WWC1, GM12248, PTAFR, THBS1, RXFP1, SOCS2, SLC9A3R1, ZFP36, CCL8, MYC, CTSH, RSPO1, IGFBP6, CD74, PLA2G2D, MMD2, PTPN13, AGT, AXL, OAS3, TMEM119, SIK1, EZR, GAS6, PTPN5	107	3309	20010	1.69546	0.999996	0.0636732	0.0594824
	GOTERM_BP_FAT	GO:1902106~negative regulation of leukocyte differentiation	5	4.5045	0.00338171	CD74, MAFB, MYC, IL4RA, C1QC	107	116	20010	8.06075	0.999996	0.0642859	0.0600547
	GOTERM_BP_FAT	GO:0022603~regulation of anatomical structure morphogenesis	15	13.5135	0.00339538	CSF1R, PTGIS, LRP1, OSR1, IL4RA, THBS1, AGT, FBXO31, SLC9A3R1, CCL8, MYC, MYO5B, CTSH, EZR, WNT4	107	1167	20010	2.40372	0.999996	0.0642859	0.0600547
	GOTERM_BP_FAT	GO:1903532~positive regulation of secretion by cell	8	7.20721	0.00355722	ANO1, LRP1, IRS1, MYO5B, PTAFR, IL4RA, EZR, AGT	107	370	20010	4.04345	0.999998	0.0670064	0.0625962
	GOTERM_BP_FAT	GO:0045639~positive regulation of myeloid cell differentiation	5	4.5045	0.00359523	CSF1R, CD74, GM12248, ISG15, FOS	107	118	20010	7.92412	0.999998	0.0670383	0.062626
	GOTERM_BP_FAT	GO:0032760~positive regulation of tumor necrosis factor production	5	4.5045	0.00359523	SPON2, H2-T23, OAS3, PTAFR, THBS1	107	118	20010	7.92412	0.999998	0.0670383	0.062626
	GOTERM_BP_FAT	GO:0070169~positive regulation of biomineral tissue development	4	3.6036	0.00378746	OSR1, TMEM119, ISG15, WNT4	107	59	20010	12.6786	0.999999	0.0697776	0.065185
	GOTERM_BP_FAT	GO:1903557~positive regulation of tumor necrosis factor superfamily cytokine production	5	4.5045	0.00381774	SPON2, H2-T23, OAS3, PTAFR, THBS1	107	120	20010	7.79206	0.999999	0.0697776	0.065185
	GOTERM_BP_FAT	GO:2000106~regulation of leukocyte apoptotic process	5	4.5045	0.00381774	CD74, AXL, MYC, SIGLEC1, GAS6	107	120	20010	7.79206	0.999999	0.0697776	0.065185
	GOTERM_BP_FAT	GO:0045778~positive regulation of ossification	5	4.5045	0.00381774	CEBPD, OSR1, TMEM119, ISG15, WNT4	107	120	20010	7.79206	0.999999	0.0697776	0.065185
	GOTERM_BP_FAT	GO:1902531~regulation of intracellular signal transduction	20	18.018	0.00385368	ERRFI1, CSF1R, CD74, LRP1, WWC1, MMD2, PTPN13, THBS1, AGT, SOCS2, SLC9A3R1, CCL8, CYTH4, AXL, MYC, IGFBP6, PIK3AP1, EZR, GAS6, PTPN5	107	1857	20010	2.0141	0.999999	0.0700877	0.0654747
	GOTERM_BP_FAT	GO:0031589~cell-substrate adhesion	8	7.20721	0.00388382	SNED1, LRP1, AXL, SPOCK2, GAS6, THBS1, AGT, WNT4	107	376	20010	3.97892	0.999999	0.0702895	0.0656632
	GOTERM_BP_FAT	GO:0007169~transmembrane receptor protein tyrosine kinase signaling pathway	10	9.00901	0.00399061	SOCS2, CSF1R, ERRFI1, SLC9A3R1, LRP1, AXL, IRS1, THBS1, AGT, WNT4	107	587	20010	3.18585	1	0.0714272	0.066726
	GOTERM_BP_FAT	GO:0072074~kidney mesenchyme development	3	2.7027	0.00402407	MYC, OSR1, WNT4	107	18	20010	31.1682	1	0.0714272	0.066726
	GOTERM_BP_FAT	GO:0008228~opsonization	3	2.7027	0.00402407	C4B, SPON2, CFP	107	18	20010	31.1682	1	0.0714272	0.066726
	GOTERM_BP_FAT	GO:0048143~astrocyte activation	3	2.7027	0.00402407	C1QA, LRP1, AGT	107	18	20010	31.1682	1	0.0714272	0.066726
	GOTERM_BP_FAT	GO:0030855~epithelial cell differentiation	12	10.8108	0.0040528	MYCL, ERRFI1, SLC9A3R1, ZFP36, KRT19, MAFB, OSR1, KRT8, PGR, EZR, AGT, WNT4	107	818	20010	2.74341	1	0.071593	0.0668809
	GOTERM_BP_FAT	GO:1901701~cellular response to oxygen-containing compound	17	15.3153	0.00409491	ERRFI1, SPON2, LRP1, IRS1, OSR1, PTAFR, FOS, THBS1, AGT, CXCL16, SOCS2, ANO1, ZFP36, AXL, MYC, EZR, GAS6	107	1455	20010	2.18499	1	0.0719925	0.0672541
	GOTERM_BP_FAT	GO:1903901~negative regulation of viral life cycle	5	4.5045	0.00416873	CD74, ZFP36, CCL8, OAS3, ISG15	107	123	20010	7.60201	1	0.0722343	0.06748
	GOTERM_BP_FAT	GO:0032963~collagen metabolic process	5	4.5045	0.00416873	ERRFI1, PRTN3, P3H4, CTSS, WNT4	107	123	20010	7.60201	1	0.0722343	0.06748
	GOTERM_BP_FAT	GO:0044259~multicellular organismal macromolecule metabolic process	5	4.5045	0.00416873	ERRFI1, PRTN3, P3H4, CTSS, WNT4	107	123	20010	7.60201	1	0.0722343	0.06748
	GOTERM_BP_FAT	GO:0044706~multi-multicellular organism process	7	6.30631	0.00418693	PTGIS, PTAFR, PGR, FOS, RXFP1, AGT, WNT4	107	286	20010	4.57715	1	0.0722343	0.06748
	GOTERM_BP_FAT	GO:0060760~positive regulation of response to cytokine stimulus	4	3.6036	0.00435603	ZBP1, CD74, AXL, GAS6	107	62	20010	12.0651	1	0.0748021	0.0698788
	GOTERM_BP_FAT	GO:0001934~positive regulation of protein phosphorylation	14	12.6126	0.00444936	CSF1R, CD74, LRP1, GM12248, WWC1, MMD2, THBS1, AGT, CCL8, TMEM119, RSPO1, IGFBP6, GAS6, PTPN5	107	1075	20010	2.43547	1	0.0760511	0.0710455
	GOTERM_BP_FAT	GO:0090183~regulation of kidney development	4	3.6036	0.00455641	MYC, OSR1, AGT, WNT4	107	63	20010	11.8736	1	0.0775219	0.0724196
	GOTERM_BP_FAT	GO:0098656~anion transmembrane transport	6	5.40541	0.00462613	ANO1, MYC, OSR1, PTAFR, THBS1, AGT	107	204	20010	5.50027	1	0.0783471	0.0731905
	GOTERM_BP_FAT	GO:0051347~positive regulation of transferase activity	10	9.00901	0.00464921	CSF1R, CD74, AXL, IRS1, MYC, MMD2, IGFBP6, GAS6, THBS1, AGT	107	601	20010	3.11164	1	0.0783784	0.0732197
	GOTERM_BP_FAT	GO:0045807~positive regulation of endocytosis	6	5.40541	0.00472219	C4B, LRP1, AXL, GAS6, CFP, PTPN5	107	205	20010	5.47344	1	0.079247	0.0740311
	GOTERM_BP_FAT	GO:0050764~regulation of phagocytosis	5	4.5045	0.00480112	C4B, LRP1, PRTN3, GAS6, CFP	107	128	20010	7.30505	1	0.0802069	0.0749278
	GOTERM_BP_FAT	GO:0043901~negative regulation of multi-organism process	6	5.40541	0.00501891	CD74, ZFP36, CCL8, OAS3, HTRA1, ISG15	107	208	20010	5.3945	1	0.0834676	0.0779739
	GOTERM_BP_FAT	GO:0002688~regulation of leukocyte chemotaxis	5	4.5045	0.00507116	CSF1R, CD74, GAS6, THBS1, NBL1	107	130	20010	7.19267	1	0.0839583	0.0784324
	GOTERM_BP_FAT	GO:1901654~response to ketone	7	6.30631	0.00518682	ERRFI1, MYC, PTAFR, SLIT3, FOS, GAS6, THBS1	107	299	20010	4.37815	1	0.0851739	0.0795679
	GOTERM_BP_FAT	GO:0061082~myeloid leukocyte cytokine production	4	3.6036	0.00519071	SPON2, CD74, AXL, GAS6	107	66	20010	11.3339	1	0.0851739	0.0795679
	GOTERM_BP_FAT	GO:0045089~positive regulation of innate immune response	7	6.30631	0.0052704	ZBP1, H2-T23, CD74, OAS3, IFI213, IFI211, PIK3AP1	107	300	20010	4.36355	1	0.0860987	0.0804318
	GOTERM_BP_FAT	GO:0008585~female gonad development	5	4.5045	0.00535121	MYC, SLIT3, PGR, AGT, WNT4	107	132	20010	7.08369	1	0.0867127	0.0810055
	GOTERM_BP_FAT	GO:0001818~negative regulation of cytokine production	7	6.30631	0.00535496	ERRFI1, ZFP36, AXL, OAS3, GAS6, EZR, THBS1	107	301	20010	4.34905	1	0.0867127	0.0810055
	GOTERM_BP_FAT	GO:0014911~positive regulation of smooth muscle cell migration	4	3.6036	0.00541335	LRP1, MYC, PGR, AGT	107	67	20010	11.1647	1	0.086896	0.0811767
	GOTERM_BP_FAT	GO:0010830~regulation of myotube differentiation	4	3.6036	0.00541335	CCL8, TMEM119, IL4RA, SIK1	107	67	20010	11.1647	1	0.086896	0.0811767
	GOTERM_BP_FAT	GO:0002577~regulation of antigen processing and presentation	3	2.7027	0.0054664	CD74, THBS1, H2-AB1	107	21	20010	26.7156	1	0.0869756	0.081251
	GOTERM_BP_FAT	GO:0035457~cellular response to interferon-alpha	3	2.7027	0.0054664	AXL, MYC, GAS6	107	21	20010	26.7156	1	0.0869756	0.081251
	GOTERM_BP_FAT	GO:0006959~humoral immune response	9	8.10811	0.00548898	C1QB, C4B, SPON2, H2-T23, C1QA, CCL8, CFP, H2-AB1, C1QC	107	506	20010	3.32625	1	0.0869756	0.081251
	GOTERM_BP_FAT	GO:0050769~positive regulation of neurogenesis	10	9.00901	0.00555989	SOCS2, EGR2, LRP1, MYC, MYO5B, MMD2, PTPN5, NBL1, AGT, FBXO31	107	618	20010	3.02604	1	0.0877227	0.081949
	GOTERM_BP_FAT	GO:0071621~granulocyte chemotaxis	5	4.5045	0.00579042	CSF1R, CD74, CCL8, THBS1, IL17RA	107	135	20010	6.92627	1	0.0909711	0.0849836
	GOTERM_BP_FAT	GO:0033674~positive regulation of kinase activity	9	8.10811	0.00594905	CSF1R, CD74, AXL, IRS1, MMD2, IGFBP6, GAS6, THBS1, AGT	107	513	20010	3.28087	1	0.0930674	0.0869419
	GOTERM_BP_FAT	GO:0050777~negative regulation of immune response	6	5.40541	0.0059883	H2-T23, AXL, OAS3, IL4RA, TAP1, ISG15	107	217	20010	5.17077	1	0.093286	0.0871461
	GOTERM_BP_FAT	GO:0046545~development of primary female sexual characteristics	5	4.5045	0.00609621	MYC, SLIT3, PGR, AGT, WNT4	107	137	20010	6.82516	1	0.0945681	0.0883438
	GOTERM_BP_FAT	GO:0045785~positive regulation of cell adhesion	9	8.10811	0.00629529	H2-T23, CD74, H2-EB1, SPOCK2, PTAFR, IL4RA, THBS1, H2-AB1, WNT4	107	518	20010	3.2492	1	0.0972478	0.0908472
	GOTERM_BP_FAT	GO:0051093~negative regulation of developmental process	15	13.5135	0.00632844	CD74, LRP1, WWC1, OSR1, IL4RA, THBS1, AGT, SOCS2, ZFP36, MAFB, MYC, TMEM119, GAS6, C1QC, WNT4	107	1253	20010	2.23874	1	0.0973524	0.0909449
	GOTERM_BP_FAT	GO:1903900~regulation of viral life cycle	6	5.40541	0.00645882	CD74, ZFP36, CCL8, AXL, OAS3, ISG15	107	221	20010	5.07718	1	0.0985371	0.0920516
	GOTERM_BP_FAT	GO:1902107~positive regulation of leukocyte differentiation	6	5.40541	0.00645882	CSF1R, CD74, AXL, IL4RA, FOS, GAS6	107	221	20010	5.07718	1	0.0985371	0.0920516
	GOTERM_BP_FAT	GO:0048511~rhythmic process	8	7.20721	0.00651108	EGR2, AHCY, AXL, MYC, SLIT3, SIK1, PGR, AGT	107	414	20010	3.61371	1	0.0989255	0.0924144
	GOTERM_BP_FAT	GO:0042698~ovulation cycle	5	4.5045	0.00657477	AXL, MYC, SLIT3, PGR, AGT	107	140	20010	6.67891	1	0.0994838	0.092936
	GOTERM_BP_FAT	GO:0030239~myofibril assembly	4	3.6036	0.00661224	KRT19, CSRP2, KRT8, FLNC	107	72	20010	10.3894	1	0.0996424	0.0930841
	GOTERM_BP_FAT	GO:0097190~apoptotic signaling pathway	10	9.00901	0.00666925	CD74, SLC9A3R1, PTGIS, MYC, KRT8, CTSH, SIGLEC1, THBS1, AGT, WNT4	107	636	20010	2.9404	1	0.100093	0.0935051
	GOTERM_BP_FAT	GO:0048468~cell development	25	22.5225	0.00673153	ZMYND15, C1QA, CSF1R, LRP1, SOCS2, SLC9A3R1, CSRP2, MYC, SLIT3, FLNC, WNT4, EGR2, OSR1, KRT8, MMD2, AGT, FBXO31, MYCL, KRT19, AXL, MYO5B, PGR, EZR, NBL1, PTPN5	107	2697	20010	1.73349	1	0.100619	0.0939962
	GOTERM_BP_FAT	GO:0001960~negative regulation of cytokine-mediated signaling pathway	4	3.6036	0.00686941	OAS3, ISG15, SLIT3, GAS6	107	73	20010	10.2471	1	0.102266	0.0955347
	GOTERM_BP_FAT	GO:0006898~receptor-mediated endocytosis	7	6.30631	0.00694979	LRP1, STON2, SIGLEC1, RSPO1, EZR, PTPN5, CXCL16	107	318	20010	4.11656	1	0.103047	0.0962644
	GOTERM_BP_FAT	GO:0040008~regulation of growth	11	9.90991	0.00700096	SOCS2, LRP1, WWC1, MYO5B, CCN5, SLIT3, GAS6, EZR, AGT, RERG, CXCL16	107	759	20010	2.71028	1	0.10339	0.0965853
	GOTERM_BP_FAT	GO:1902533~positive regulation of intracellular signal transduction	14	12.6126	0.00725413	CSF1R, CD74, LRP1, WWC1, MMD2, THBS1, AGT, SLC9A3R1, CCL8, AXL, MYC, IGFBP6, PIK3AP1, GAS6	107	1141	20010	2.29459	1	0.106416	0.0994119
	GOTERM_BP_FAT	GO:0030198~extracellular matrix organization	7	6.30631	0.0072635	SPOCK2, P3H4, AEBP1, GAS6, RXFP1, CTSS, AGT	107	321	20010	4.07809	1	0.106416	0.0994119
	GOTERM_BP_FAT	GO:0048646~anatomical structure formation involved in morphogenesis	15	13.5135	0.00733913	EGR2, PTGIS, OSR1, KRT8, HTRA1, IL4RA, THBS1, AGT, KRT19, CSRP2, MAFB, CCL8, CTSH, FLNC, WNT4	107	1275	20010	2.20011	1	0.107099	0.10005
	GOTERM_BP_FAT	GO:0043062~extracellular structure organization	7	6.30631	0.00747826	SPOCK2, P3H4, AEBP1, GAS6, RXFP1, CTSS, AGT	107	323	20010	4.05283	1	0.1087	0.101545
	GOTERM_BP_FAT	GO:0003006~developmental process involved in reproduction	13	11.7117	0.0076647	ZMYND15, PTGIS, OSR1, KRT8, HTRA1, AGT, KRT19, AXL, MYC, TMEM119, PGR, SLIT3, WNT4	107	1019	20010	2.38579	1	0.110973	0.103669
	GOTERM_BP_FAT	GO:0072567~chemokine (C-X-C motif) ligand 2 production	3	2.7027	0.00770234	CD74, LRP1, OAS3	107	25	20010	22.4411	1	0.111082	0.103771
	GOTERM_BP_FAT	GO:0002440~production of molecular mediator of immune response	8	7.20721	0.00775413	SPON2, H2-T23, CD74, H2-EB1, AXL, IL4RA, GAS6, H2-AB1	107	428	20010	3.4955	1	0.111394	0.104062
	GOTERM_BP_FAT	GO:0042471~ear morphogenesis	5	4.5045	0.00778681	SLC9A3R1, MAFB, MYC, OSR1, RPL38	107	147	20010	6.36086	1	0.11143	0.104096
	GOTERM_BP_FAT	GO:0071396~cellular response to lipid	11	9.90991	0.0079159	SPON2, ERRFI1, ZFP36, AXL, IRS1, MYC, OSR1, PTAFR, PGR, ATP1A1, CXCL16	107	773	20010	2.66119	1	0.11284	0.105413
	GOTERM_BP_FAT	GO:0060761~negative regulation of response to cytokine stimulus	4	3.6036	0.00795721	OAS3, ISG15, SLIT3, GAS6	107	77	20010	9.71477	1	0.112992	0.105555
	GOTERM_BP_FAT	GO:0002699~positive regulation of immune effector process	7	6.30631	0.00815012	C4B, SPON2, H2-T23, CD74, PTAFR, IL4RA, CFP	107	329	20010	3.97892	1	0.115288	0.1077
	GOTERM_BP_FAT	GO:0061097~regulation of protein tyrosine kinase activity	4	3.6036	0.00824408	CSF1R, ERRFI1, GAS6, AGT	107	78	20010	9.59022	1	0.116008	0.108372
	GOTERM_BP_FAT	GO:0016192~vesicle-mediated transport	18	16.2162	0.00826381	SPON2, LRP1, PTAFR, IL4RA, STON2, CFP, THBS1, CXCL16, C4B, CCL8, AXL, MYO5B, PRTN3, SIGLEC1, RSPO1, EZR, GAS6, PTPN5	107	1708	20010	1.97082	1	0.116008	0.108372
	GOTERM_BP_FAT	GO:0042474~middle ear morphogenesis	3	2.7027	0.00831555	MYC, OSR1, RPL38	107	26	20010	21.578	1	0.116292	0.108638
	GOTERM_BP_FAT	GO:0002367~cytokine production involved in immune response	5	4.5045	0.00834833	SPON2, H2-T23, CD74, AXL, GAS6	107	150	20010	6.23364	1	0.11631	0.108654
	GOTERM_BP_FAT	GO:0048146~positive regulation of fibroblast proliferation	4	3.6036	0.00853699	CD74, MYC, GAS6, AGT	107	79	20010	9.46883	1	0.117665	0.109921
	GOTERM_BP_FAT	GO:2001233~regulation of apoptotic signaling pathway	8	7.20721	0.008539	CD74, SLC9A3R1, MYC, CTSH, SIGLEC1, THBS1, AGT, WNT4	107	436	20010	3.43136	1	0.117665	0.109921
	GOTERM_BP_FAT	GO:0044236~multicellular organism metabolic process	5	4.5045	0.00854125	ERRFI1, PRTN3, P3H4, CTSS, WNT4	107	151	20010	6.19236	1	0.117665	0.109921
	GOTERM_BP_FAT	GO:0051047~positive regulation of secretion	8	7.20721	0.00874406	ANO1, LRP1, IRS1, MYO5B, PTAFR, IL4RA, EZR, AGT	107	438	20010	3.4157	1	0.120011	0.112112
	GOTERM_BP_FAT	GO:0072171~mesonephric tubule morphogenesis	4	3.6036	0.00883595	MYC, OSR1, AGT, WNT4	107	80	20010	9.35047	1	0.120823	0.112871
	GOTERM_BP_FAT	GO:0002685~regulation of leukocyte migration	6	5.40541	0.00890043	CSF1R, CD74, PTAFR, GAS6, THBS1, NBL1	107	239	20010	4.6948	1	0.121256	0.113275
	GOTERM_BP_FAT	GO:0048839~inner ear development	6	5.40541	0.0090524	C1QB, H2-T23, MYCL, SLC9A3R1, MAFB, CEBPD	107	240	20010	4.67523	1	0.122873	0.114786
	GOTERM_BP_FAT	GO:0071887~leukocyte apoptotic process	5	4.5045	0.00913747	CD74, AXL, MYC, SIGLEC1, GAS6	107	154	20010	6.07173	1	0.123494	0.115366
	GOTERM_BP_FAT	GO:0006909~phagocytosis	8	7.20721	0.00916503	C4B, SPON2, LRP1, AXL, PRTN3, GAS6, CFP, THBS1	107	442	20010	3.38478	1	0.123494	0.115366
	GOTERM_BP_FAT	GO:0032270~positive regulation of cellular protein metabolic process	18	16.2162	0.00933348	CSF1R, CD74, LRP1, GM12248, WWC1, PTAFR, MMD2, THBS1, AGT, CCL8, MYC, TMEM119, CTSH, RSPO1, IGFBP6, EZR, GAS6, PTPN5	107	1730	20010	1.94576	1	0.124967	0.116742
	GOTERM_BP_FAT	GO:1904019~epithelial cell apoptotic process	5	4.5045	0.00934208	ZFP36, KRT8, PGR, GAS6, THBS1	107	155	20010	6.03256	1	0.124967	0.116742
	GOTERM_BP_FAT	GO:2000341~regulation of chemokine (C-X-C motif) ligand 2 production	3	2.7027	0.00960537	CD74, LRP1, OAS3	107	28	20010	20.0367	1	0.127565	0.119169
	GOTERM_BP_FAT	GO:0030728~ovulation	3	2.7027	0.00960537	MYC, PGR, AGT	107	28	20010	20.0367	1	0.127565	0.119169
	GOTERM_BP_FAT	GO:0043410~positive regulation of MAPK cascade	9	8.10811	0.00974358	CSF1R, CD74, CCL8, LRP1, WWC1, IGFBP6, GAS6, THBS1, AGT	107	559	20010	3.01088	1	0.128937	0.12045
	GOTERM_BP_FAT	GO:0036120~cellular response to platelet-derived growth factor stimulus	3	2.7027	0.0102815	ERRFI1, MYC, MTSS2	107	29	20010	19.3458	1	0.135087	0.126195
	GOTERM_BP_FAT	GO:0018126~protein hydroxylation	3	2.7027	0.0102815	P4HA3, PLOD2, P3H4	107	29	20010	19.3458	1	0.135087	0.126195
	GOTERM_BP_FAT	GO:0009617~response to bacterium	14	12.6126	0.0104022	H2-T23, SPON2, SP110, SLFN4, PTAFR, IFI211, ISG15, FOS, MPEG1, IIGP1, CXCL16, ZFP36, AXL, OAS3	107	1194	20010	2.19274	1	0.135462	0.126546
	GOTERM_BP_FAT	GO:0045859~regulation of protein kinase activity	10	9.00901	0.0105605	CSF1R, CD74, ERRFI1, SLC9A3R1, MMD2, IGFBP6, GAS6, THBS1, PTPN5, AGT	107	685	20010	2.73006	1	0.135462	0.126546
	GOTERM_BP_FAT	GO:0090094~metanephric cap mesenchymal cell proliferation involved in metanephros development	2	1.8018	0.0105669	MYC, OSR1	107	2	20010	187.009	1	0.135462	0.126546
	GOTERM_BP_FAT	GO:1904300~positive regulation of transcytosis	2	1.8018	0.0105669	LRP1, PTAFR	107	2	20010	187.009	1	0.135462	0.126546
	GOTERM_BP_FAT	GO:0072186~metanephric cap morphogenesis	2	1.8018	0.0105669	MYC, OSR1	107	2	20010	187.009	1	0.135462	0.126546
	GOTERM_BP_FAT	GO:1904298~regulation of transcytosis	2	1.8018	0.0105669	LRP1, PTAFR	107	2	20010	187.009	1	0.135462	0.126546
	GOTERM_BP_FAT	GO:0072185~metanephric cap development	2	1.8018	0.0105669	MYC, OSR1	107	2	20010	187.009	1	0.135462	0.126546
	GOTERM_BP_FAT	GO:1902532~negative regulation of intracellular signal transduction	9	8.10811	0.0106596	SOCS2, CD74, ERRFI1, SLC9A3R1, WWC1, EZR, THBS1, PTPN5, AGT	107	568	20010	2.96318	1	0.136178	0.127215
	GOTERM_BP_FAT	GO:0007423~sensory organ development	10	9.00901	0.0109408	C1QB, H2-T23, MYCL, SLC9A3R1, MAFB, CEBPD, MYC, OSR1, RPL38, AQP5	107	689	20010	2.71421	1	0.139288	0.13012
	GOTERM_BP_FAT	GO:0051962~positive regulation of nervous system development	10	9.00901	0.0113314	SOCS2, EGR2, LRP1, MYC, MYO5B, MMD2, PTPN5, NBL1, AGT, FBXO31	107	693	20010	2.69855	1	0.143765	0.134302
	GOTERM_BP_FAT	GO:0072078~nephron tubule morphogenesis	4	3.6036	0.011803	MYC, OSR1, AGT, WNT4	107	89	20010	8.40491	1	0.149236	0.139413
	GOTERM_BP_FAT	GO:0000187~activation of MAPK activity	4	3.6036	0.0121638	CD74, IGFBP6, THBS1, AGT	107	90	20010	8.31153	1	0.152751	0.142697
	GOTERM_BP_FAT	GO:0034103~regulation of tissue remodeling	4	3.6036	0.0121638	CSF1R, LRP1, TMEM119, AGT	107	90	20010	8.31153	1	0.152751	0.142697
	GOTERM_BP_FAT	GO:0002698~negative regulation of immune effector process	5	4.5045	0.0122778	H2-T23, AXL, HTRA1, IL4RA, TAP1	107	168	20010	5.56575	1	0.15366	0.143546
	GOTERM_BP_FAT	GO:0036119~response to platelet-derived growth factor	3	2.7027	0.012432	ERRFI1, MYC, MTSS2	107	32	20010	17.5321	1	0.155064	0.144858
	GOTERM_BP_FAT	GO:0030500~regulation of bone mineralization	4	3.6036	0.0125309	OSR1, TMEM119, ISG15, WNT4	107	91	20010	8.22019	1	0.155771	0.145519
	GOTERM_BP_FAT	GO:0032675~regulation of interleukin-6 production	5	4.5045	0.0127761	SPON2, CD74, PTAFR, GAS6, IL17RA	107	170	20010	5.50027	1	0.157361	0.147004
	GOTERM_BP_FAT	GO:0001558~regulation of cell growth	8	7.20721	0.0128117	SOCS2, LRP1, MYO5B, CCN5, SLIT3, AGT, RERG, CXCL16	107	472	20010	3.16965	1	0.157361	0.147004
	GOTERM_BP_FAT	GO:0072088~nephron epithelium morphogenesis	4	3.6036	0.0129043	MYC, OSR1, AGT, WNT4	107	92	20010	8.13084	1	0.157361	0.147004
	GOTERM_BP_FAT	GO:0045824~negative regulation of innate immune response	4	3.6036	0.0129043	H2-T23, OAS3, TAP1, ISG15	107	92	20010	8.13084	1	0.157361	0.147004
	GOTERM_BP_FAT	GO:0002687~positive regulation of leukocyte migration	5	4.5045	0.0130301	CSF1R, CD74, PTAFR, GAS6, THBS1	107	171	20010	5.46811	1	0.157361	0.147004
	GOTERM_BP_FAT	GO:0032635~interleukin-6 production	5	4.5045	0.0130301	SPON2, CD74, PTAFR, GAS6, IL17RA	107	171	20010	5.46811	1	0.157361	0.147004
	GOTERM_BP_FAT	GO:0002696~positive regulation of leukocyte activation	9	8.10811	0.0130448	H2-T23, CD74, H2-EB1, AXL, PTAFR, IL4RA, GAS6, THBS1, H2-AB1	107	589	20010	2.85753	1	0.157361	0.147004
	GOTERM_BP_FAT	GO:0010720~positive regulation of cell development	10	9.00901	0.0131095	SOCS2, EGR2, LRP1, MYC, MYO5B, MMD2, PTPN5, NBL1, AGT, FBXO31	107	710	20010	2.63393	1	0.157361	0.147004
	GOTERM_BP_FAT	GO:0048545~response to steroid hormone	7	6.30631	0.0131227	ERRFI1, ZFP36, PTAFR, SLIT3, PGR, ATP1A1, FOS	107	365	20010	3.58648	1	0.157361	0.147004
	GOTERM_BP_FAT	GO:0007548~sex differentiation	7	6.30631	0.0131227	AXL, MYC, OSR1, SLIT3, PGR, AGT, WNT4	107	365	20010	3.58648	1	0.157361	0.147004
	GOTERM_BP_FAT	GO:0030029~actin filament-based process	11	9.90991	0.0131276	CSF1R, SLC9A3R1, KRT19, CSRP2, LRP1, MYO5B, KRT8, ATP1A1, FLNC, EZR, WNT4	107	835	20010	2.4636	1	0.157361	0.147004
	GOTERM_BP_FAT	GO:0051128~regulation of cellular component organization	26	23.4234	0.013203	CSF1R, LRP1, IL4RA, STON2, AEBP1, CFP, RERG, CXCL16, SOCS2, C4B, SLC9A3R1, CCL8, MYC, CCN5, SLIT3, RSPO1, WNT4, ISG15, AGT, FBXO31, AXL, MYO5B, PRTN3, EZR, GAS6, PTPN5	107	3010	20010	1.61536	1	0.157752	0.147369
	GOTERM_BP_FAT	GO:0050766~positive regulation of phagocytosis	4	3.6036	0.013284	C4B, LRP1, GAS6, CFP	107	93	20010	8.04341	1	0.158208	0.147795
	GOTERM_BP_FAT	GO:0046942~carboxylic acid transport	7	6.30631	0.0134498	SLC9A3R1, PLA2G2D, MYC, OSR1, FOLR2, THBS1, AGT	107	367	20010	3.56694	1	0.159245	0.148764
	GOTERM_BP_FAT	GO:0030278~regulation of ossification	6	5.40541	0.0134573	EGR2, CEBPD, OSR1, TMEM119, ISG15, WNT4	107	265	20010	4.23417	1	0.159245	0.148764
	GOTERM_BP_FAT	GO:0071674~mononuclear cell migration	4	3.6036	0.0136701	CSF1R, CCL8, THBS1, NBL1	107	94	20010	7.95784	1	0.160732	0.150153
	GOTERM_BP_FAT	GO:0061333~renal tubule morphogenesis	4	3.6036	0.0136701	MYC, OSR1, AGT, WNT4	107	94	20010	7.95784	1	0.160732	0.150153
	GOTERM_BP_FAT	GO:0051250~negative regulation of lymphocyte activation	5	4.5045	0.0138112	CD74, PLA2G2D, AXL, IL4RA, H2-AB1	107	174	20010	5.37383	1	0.161876	0.151221
	GOTERM_BP_FAT	GO:0045321~leukocyte activation	14	12.6126	0.0139269	H2-T23, C1QA, CD74, H2-EB1, PLA2G2D, PTAFR, IL4RA, THBS1, MAFB, AXL, MYC, GAS6, H2-AB1, WNT4	107	1240	20010	2.1114	1	0.162136	0.151464
	GOTERM_BP_FAT	GO:0015849~organic acid transport	7	6.30631	0.0139511	SLC9A3R1, PLA2G2D, MYC, OSR1, FOLR2, THBS1, AGT	107	370	20010	3.53801	1	0.162136	0.151464
	GOTERM_BP_FAT	GO:0035455~response to interferon-alpha	3	2.7027	0.0139651	AXL, MYC, GAS6	107	34	20010	16.5008	1	0.162136	0.151464
	GOTERM_BP_FAT	GO:0072028~nephron morphogenesis	4	3.6036	0.0140625	MYC, OSR1, AGT, WNT4	107	95	20010	7.87408	1	0.162754	0.152042
	GOTERM_BP_FAT	GO:0030098~lymphocyte differentiation	8	7.20721	0.0142322	CD74, PLA2G2D, MAFB, AXL, IL4RA, GAS6, H2-AB1, WNT4	107	482	20010	3.10389	1	0.164204	0.153396
	GOTERM_BP_FAT	GO:0045666~positive regulation of neuron differentiation	8	7.20721	0.0145293	SOCS2, LRP1, MYO5B, MMD2, PTPN5, NBL1, AGT, FBXO31	107	484	20010	3.09106	1	0.167087	0.15609
	GOTERM_BP_FAT	GO:0042110~T cell activation	9	8.10811	0.0145726	H2-T23, CD74, H2-EB1, PLA2G2D, MAFB, MYC, IL4RA, H2-AB1, WNT4	107	601	20010	2.80047	1	0.167087	0.15609
	GOTERM_BP_FAT	GO:0051247~positive regulation of protein metabolic process	18	16.2162	0.0149267	CSF1R, CD74, LRP1, GM12248, WWC1, PTAFR, MMD2, THBS1, AGT, CCL8, MYC, TMEM119, CTSH, RSPO1, IGFBP6, EZR, GAS6, PTPN5	107	1820	20010	1.84954	1	0.170617	0.159388
	GOTERM_BP_FAT	GO:0032268~regulation of cellular protein metabolic process	25	22.5225	0.0151182	ERRFI1, CSF1R, LRP1, WWC1, GM12248, RPLP1, PTAFR, THBS1, SLC9A3R1, ZFP36, CCL8, MYC, CTSH, RPL38, RSPO1, IGFBP6, CD74, ISG15, MMD2, PTPN13, AGT, TMEM119, EZR, GAS6, PTPN5	107	2887	20010	1.61941	1	0.171842	0.160532
	GOTERM_BP_FAT	GO:0009913~epidermal cell differentiation	6	5.40541	0.0151269	MYCL, ERRFI1, SLC9A3R1, ZFP36, MAFB, KRT8	107	273	20010	4.1101	1	0.171842	0.160532
	GOTERM_BP_FAT	GO:0048699~generation of neurons	18	16.2162	0.0153016	C1QA, CSF1R, EGR2, LRP1, MMD2, AGT, FBXO31, SOCS2, MYCL, SLC9A3R1, AXL, MYC, MYO5B, SLIT3, GAS6, NBL1, PTPN5, WNT4	107	1825	20010	1.84448	1	0.173293	0.161887
	GOTERM_BP_FAT	GO:0030879~mammary gland development	5	4.5045	0.0154613	SOCS2, IRS1, PGR, RXFP1, WNT4	107	180	20010	5.1947	1	0.174566	0.163077
	GOTERM_BP_FAT	GO:1901653~cellular response to peptide	7	6.30631	0.0155335	SOCS2, ERRFI1, ANO1, LRP1, IRS1, MYC, AGT	107	379	20010	3.454	1	0.174847	0.163339
	GOTERM_BP_FAT	GO:0046718~viral entry into host cell	4	3.6036	0.0156959	CD74, AXL, SIGLEC1, GAS6	107	99	20010	7.55593	1	0.175802	0.164231
	GOTERM_BP_FAT	GO:1903039~positive regulation of leukocyte cell-cell adhesion	6	5.40541	0.0157873	H2-T23, CD74, H2-EB1, PTAFR, IL4RA, H2-AB1	107	276	20010	4.06542	1	0.175802	0.164231
	GOTERM_BP_FAT	GO:0060748~tertiary branching involved in mammary gland duct morphogenesis	2	1.8018	0.0158088	PGR, WNT4	107	3	20010	124.673	1	0.175802	0.164231
	GOTERM_BP_FAT	GO:0035284~brain segmentation	2	1.8018	0.0158088	EGR2, MAFB	107	3	20010	124.673	1	0.175802	0.164231
	GOTERM_BP_FAT	GO:0071496~cellular response to external stimulus	7	6.30631	0.0159014	AXL, SIK1, ATP1A1, FOS, GAS6, AGT, WNT4	107	381	20010	3.43587	1	0.176082	0.164493
	GOTERM_BP_FAT	GO:0032989~cellular component morphogenesis	14	12.6126	0.0161002	CSF1R, EGR2, LRP1, KRT8, FBXO31, SLC9A3R1, KRT19, CSRP2, AXL, MYO5B, SLIT3, FLNC, EZR, NBL1	107	1264	20010	2.07131	1	0.176082	0.164493
	GOTERM_BP_FAT	GO:0001656~metanephros development	4	3.6036	0.0161202	MYC, OSR1, CTSH, WNT4	107	100	20010	7.48037	1	0.176082	0.164493
	GOTERM_BP_FAT	GO:0051806~entry into cell of other organism involved in symbiotic interaction	4	3.6036	0.0161202	CD74, AXL, SIGLEC1, GAS6	107	100	20010	7.48037	1	0.176082	0.164493
	GOTERM_BP_FAT	GO:0044409~entry into host	4	3.6036	0.0161202	CD74, AXL, SIGLEC1, GAS6	107	100	20010	7.48037	1	0.176082	0.164493
	GOTERM_BP_FAT	GO:0030260~entry into host cell	4	3.6036	0.0161202	CD74, AXL, SIGLEC1, GAS6	107	100	20010	7.48037	1	0.176082	0.164493
	GOTERM_BP_FAT	GO:0030155~regulation of cell adhesion	11	9.90991	0.0161916	H2-T23, CD74, H2-EB1, PLA2G2D, LRP1, SPOCK2, PTAFR, IL4RA, THBS1, H2-AB1, WNT4	107	863	20010	2.38366	1	0.176341	0.164734
	GOTERM_BP_FAT	GO:0051384~response to glucocorticoid	5	4.5045	0.016331	ERRFI1, ZFP36, PTAFR, SLIT3, FOS	107	183	20010	5.10954	1	0.177145	0.165485
	GOTERM_BP_FAT	GO:0014002~astrocyte development	3	2.7027	0.0164094	C1QA, LRP1, AGT	107	37	20010	15.1629	1	0.177145	0.165485
	GOTERM_BP_FAT	GO:0032816~positive regulation of natural killer cell activation	3	2.7027	0.0164094	H2-T23, AXL, GAS6	107	37	20010	15.1629	1	0.177145	0.165485
	GOTERM_BP_FAT	GO:0051828~entry into other organism involved in symbiotic interaction	4	3.6036	0.016551	CD74, AXL, SIGLEC1, GAS6	107	101	20010	7.40631	1	0.178152	0.166427
	GOTERM_BP_FAT	GO:0050867~positive regulation of cell activation	9	8.10811	0.0168082	H2-T23, CD74, H2-EB1, AXL, PTAFR, IL4RA, GAS6, THBS1, H2-AB1	107	617	20010	2.72785	1	0.180231	0.168368
	GOTERM_BP_FAT	GO:0031214~biomineral tissue development	5	4.5045	0.0169276	OSR1, TMEM119, ISG15, GAS6, WNT4	107	185	20010	5.05431	1	0.180231	0.168368
	GOTERM_BP_FAT	GO:1905039~carboxylic acid transmembrane transport	4	3.6036	0.0169882	MYC, OSR1, THBS1, AGT	107	102	20010	7.3337	1	0.180231	0.168368
	GOTERM_BP_FAT	GO:0002028~regulation of sodium ion transport	4	3.6036	0.0169882	SLC9A3R1, OSR1, SIK1, ATP1A1	107	102	20010	7.3337	1	0.180231	0.168368
	GOTERM_BP_FAT	GO:0002690~positive regulation of leukocyte chemotaxis	4	3.6036	0.0169882	CSF1R, CD74, GAS6, THBS1	107	102	20010	7.3337	1	0.180231	0.168368
	GOTERM_BP_FAT	GO:0098602~single organism cell adhesion	10	9.00901	0.0174163	H2-T23, CD74, H2-EB1, PLA2G2D, AXL, PTAFR, IL4RA, EZR, THBS1, H2-AB1	107	745	20010	2.51019	1	0.183881	0.171778
	GOTERM_BP_FAT	GO:1903825~organic acid transmembrane transport	4	3.6036	0.0174318	MYC, OSR1, THBS1, AGT	107	103	20010	7.2625	1	0.183881	0.171778
	GOTERM_BP_FAT	GO:0044344~cellular response to fibroblast growth factor stimulus	4	3.6036	0.0178819	ZFP36, MYC, THBS1, WNT4	107	104	20010	7.19267	1	0.187557	0.175212
	GOTERM_BP_FAT	GO:0046849~bone remodeling	4	3.6036	0.0178819	CSF1R, TMEM119, P3H4, CTSS	107	104	20010	7.19267	1	0.187557	0.175212
	GOTERM_BP_FAT	GO:0070661~leukocyte proliferation	7	6.30631	0.0180335	H2-T23, CSF1R, CD74, PLA2G2D, MYC, H2-AB1, WNT4	107	392	20010	3.33945	1	0.188463	0.176059
	GOTERM_BP_FAT	GO:0031399~regulation of protein modification process	19	17.1171	0.0180704	ERRFI1, CSF1R, CD74, LRP1, GM12248, WWC1, MMD2, ISG15, PTPN13, THBS1, AGT, SLC9A3R1, CCL8, TMEM119, RSPO1, IGFBP6, EZR, GAS6, PTPN5	107	2008	20010	1.76951	1	0.188463	0.176059
	GOTERM_BP_FAT	GO:0014910~regulation of smooth muscle cell migration	4	3.6036	0.0183384	LRP1, MYC, PGR, AGT	107	105	20010	7.12417	1	0.190007	0.177501
	GOTERM_BP_FAT	GO:0045638~negative regulation of myeloid cell differentiation	4	3.6036	0.0183384	ZFP36, MAFB, MYC, C1QC	107	105	20010	7.12417	1	0.190007	0.177501
	GOTERM_BP_FAT	GO:0008406~gonad development	6	5.40541	0.0183729	MYC, OSR1, SLIT3, PGR, AGT, WNT4	107	287	20010	3.9096	1	0.190007	0.177501
	GOTERM_BP_FAT	GO:0048754~branching morphogenesis of an epithelial tube	5	4.5045	0.0184783	MYC, CTSH, PGR, AGT, WNT4	107	190	20010	4.9213	1	0.190564	0.178021
	GOTERM_BP_FAT	GO:0045216~cell-cell junction organization	6	5.40541	0.018621	CSF1R, PARD6B, LRP1, PRTN3, AGT, WNT4	107	288	20010	3.89603	1	0.1915	0.178896
	GOTERM_BP_FAT	GO:0014066~regulation of phosphatidylinositol 3-kinase signaling	4	3.6036	0.0188014	SLC9A3R1, PTPN13, PIK3AP1, AGT	107	106	20010	7.05696	1	0.192819	0.180128
	GOTERM_BP_FAT	GO:0043409~negative regulation of MAPK cascade	5	4.5045	0.0191225	ERRFI1, SLC9A3R1, EZR, PTPN5, AGT	107	192	20010	4.87004	1	0.195568	0.182697
	GOTERM_BP_FAT	GO:0006820~anion transport	9	8.10811	0.0192826	SLC9A3R1, ANO1, PLA2G2D, MYC, OSR1, PTAFR, FOLR2, THBS1, AGT	107	633	20010	2.6589	1	0.196661	0.183717
	GOTERM_BP_FAT	GO:0046631~alpha-beta T cell activation	5	4.5045	0.0197805	H2-T23, PLA2G2D, MYC, IL4RA, H2-AB1	107	194	20010	4.81983	1	0.201183	0.187942
	GOTERM_BP_FAT	GO:0045137~development of primary sexual characteristics	6	5.40541	0.0198947	MYC, OSR1, SLIT3, PGR, AGT, WNT4	107	293	20010	3.82954	1	0.201789	0.188508
	GOTERM_BP_FAT	GO:0055002~striated muscle cell development	5	4.5045	0.0201146	KRT19, CSRP2, KRT8, FLNC, AGT	107	195	20010	4.79511	1	0.203461	0.19007
	GOTERM_BP_FAT	GO:0006464~cellular protein modification process	31	27.9279	0.0205661	ERRFI1, CSF1R, LRP1, WWC1, GM12248, PLOD2, THBS1, SOCS2, SLC9A3R1, ZFP36, CCL8, SPOCK2, MYC, CTSH, RSPO1, IGFBP6, CD74, EGR2, P3H4, ISG15, MMD2, PTPN13, AGT, FBXO31, AXL, P4HA3, TMEM119, SIK1, EZR, GAS6, PTPN5	107	3941	20010	1.47102	1	0.207292	0.193649
	GOTERM_BP_FAT	GO:0036211~protein modification process	31	27.9279	0.0207014	ERRFI1, CSF1R, LRP1, WWC1, GM12248, PLOD2, THBS1, SOCS2, SLC9A3R1, ZFP36, CCL8, SPOCK2, MYC, CTSH, RSPO1, IGFBP6, CD74, EGR2, P3H4, ISG15, MMD2, PTPN13, AGT, FBXO31, AXL, P4HA3, TMEM119, SIK1, EZR, GAS6, PTPN5	107	3943	20010	1.47027	1	0.207292	0.193649
	GOTERM_BP_FAT	GO:0072080~nephron tubule development	4	3.6036	0.020718	MYC, OSR1, AGT, WNT4	107	110	20010	6.80034	1	0.207292	0.193649
	GOTERM_BP_FAT	GO:0022602~ovulation cycle process	4	3.6036	0.020718	MYC, SLIT3, PGR, AGT	107	110	20010	6.80034	1	0.207292	0.193649
	GOTERM_BP_FAT	GO:0072131~kidney mesenchyme morphogenesis	2	1.8018	0.0210232	MYC, OSR1	107	4	20010	93.5047	1	0.20865	0.194917
	GOTERM_BP_FAT	GO:0021571~rhombomere 5 development	2	1.8018	0.0210232	EGR2, MAFB	107	4	20010	93.5047	1	0.20865	0.194917
	GOTERM_BP_FAT	GO:0072133~metanephric mesenchyme morphogenesis	2	1.8018	0.0210232	MYC, OSR1	107	4	20010	93.5047	1	0.20865	0.194917
	GOTERM_BP_FAT	GO:0032755~positive regulation of interleukin-6 production	4	3.6036	0.0212133	SPON2, CD74, PTAFR, IL17RA	107	111	20010	6.73908	1	0.209411	0.195628
	GOTERM_BP_FAT	GO:0071774~response to fibroblast growth factor	4	3.6036	0.0212133	ZFP36, MYC, THBS1, WNT4	107	111	20010	6.73908	1	0.209411	0.195628
	GOTERM_BP_FAT	GO:0001657~ureteric bud development	4	3.6036	0.0217151	MYC, OSR1, AGT, WNT4	107	112	20010	6.67891	1	0.212896	0.198884
	GOTERM_BP_FAT	GO:0014909~smooth muscle cell migration	4	3.6036	0.0217151	LRP1, MYC, PGR, AGT	107	112	20010	6.67891	1	0.212896	0.198884
	GOTERM_BP_FAT	GO:0016485~protein processing	6	5.40541	0.0217722	MAFB, MYC, CTSH, CPZ, THBS1, CTSS	107	300	20010	3.74019	1	0.212896	0.198884
	GOTERM_BP_FAT	GO:0098801~regulation of renal system process	3	2.7027	0.0217971	SLC9A3R1, GAS6, AGT	107	43	20010	13.0472	1	0.212896	0.198884
	GOTERM_BP_FAT	GO:0031325~positive regulation of cellular metabolic process	29	26.1261	0.0225884	CSF1R, CEBPD, LRP1, IRS1, WWC1, GM12248, PTAFR, THBS1, RXFP1, ZFP36, CCL8, MYC, CTSH, RSPO1, IGFBP6, WNT4, CD74, EGR2, OSR1, MMD2, FOS, AGT, MAFB, AXL, TMEM119, PGR, EZR, GAS6, PTPN5	107	3640	20010	1.48991	1	0.219947	0.20547
	GOTERM_BP_FAT	GO:0060993~kidney morphogenesis	4	3.6036	0.0227382	MYC, OSR1, AGT, WNT4	107	114	20010	6.56173	1	0.219947	0.20547
	GOTERM_BP_FAT	GO:0061326~renal tubule development	4	3.6036	0.0227382	MYC, OSR1, AGT, WNT4	107	114	20010	6.56173	1	0.219947	0.20547
	GOTERM_BP_FAT	GO:0060338~regulation of type I interferon-mediated signaling pathway	3	2.7027	0.0227572	ZBP1, OAS3, ISG15	107	44	20010	12.7506	1	0.219947	0.20547
	GOTERM_BP_FAT	GO:0002695~negative regulation of leukocyte activation	5	4.5045	0.023649	CD74, PLA2G2D, AXL, IL4RA, H2-AB1	107	205	20010	4.5612	1	0.226239	0.211349
	GOTERM_BP_FAT	GO:0031960~response to corticosteroid	5	4.5045	0.023649	ERRFI1, ZFP36, PTAFR, SLIT3, FOS	107	205	20010	4.5612	1	0.226239	0.211349
	GOTERM_BP_FAT	GO:0016337~single organismal cell-cell adhesion	9	8.10811	0.0236567	H2-T23, CD74, H2-EB1, PLA2G2D, PTAFR, IL4RA, EZR, THBS1, H2-AB1	107	658	20010	2.55788	1	0.226239	0.211349
	GOTERM_BP_FAT	GO:0061098~positive regulation of protein tyrosine kinase activity	3	2.7027	0.0237346	CSF1R, GAS6, AGT	107	45	20010	12.4673	1	0.226239	0.211349
	GOTERM_BP_FAT	GO:0072163~mesonephric epithelium development	4	3.6036	0.0237872	MYC, OSR1, AGT, WNT4	107	116	20010	6.4486	1	0.226239	0.211349
	GOTERM_BP_FAT	GO:0072164~mesonephric tubule development	4	3.6036	0.0237872	MYC, OSR1, AGT, WNT4	107	116	20010	6.4486	1	0.226239	0.211349
	GOTERM_BP_FAT	GO:0007009~plasma membrane organization	7	6.30631	0.0238372	SLC9A3R1, MAFB, LRP1, MYO5B, GAS6, EZR, MTSS2	107	418	20010	3.13174	1	0.226239	0.211349
	GOTERM_BP_FAT	GO:0043491~protein kinase B signaling	5	4.5045	0.0240218	SLC9A3R1, AXL, IRS1, GAS6, THBS1	107	206	20010	4.53906	1	0.226825	0.211896
	GOTERM_BP_FAT	GO:0031032~actomyosin structure organization	5	4.5045	0.0240218	KRT19, CSRP2, KRT8, FLNC, WNT4	107	206	20010	4.53906	1	0.226825	0.211896
	GOTERM_BP_FAT	GO:0022407~regulation of cell-cell adhesion	8	7.20721	0.0243321	H2-T23, CD74, H2-EB1, PLA2G2D, PTAFR, IL4RA, H2-AB1, WNT4	107	538	20010	2.78081	1	0.22901	0.213937
	GOTERM_BP_FAT	GO:0008285~negative regulation of cell proliferation	10	9.00901	0.0243773	CSF1R, SLC9A3R1, PLA2G2D, MYC, CCN5, SLIT3, THBS1, AGT, RERG, H2-AB1	107	790	20010	2.36721	1	0.22901	0.213937
	GOTERM_BP_FAT	GO:0010935~regulation of macrophage cytokine production	3	2.7027	0.0247289	SPON2, CD74, AXL	107	46	20010	12.1963	1	0.231724	0.216472
	GOTERM_BP_FAT	GO:1903037~regulation of leukocyte cell-cell adhesion	7	6.30631	0.0250819	H2-T23, CD74, H2-EB1, PLA2G2D, PTAFR, IL4RA, H2-AB1	107	423	20010	3.09472	1	0.234437	0.219006
	GOTERM_BP_FAT	GO:0048661~positive regulation of smooth muscle cell proliferation	4	3.6036	0.0254092	MYC, PTAFR, THBS1, AGT	107	119	20010	6.28603	1	0.236896	0.221304
	GOTERM_BP_FAT	GO:0014070~response to organic cyclic compound	13	11.7117	0.0254817	ERRFI1, IRS1, PTAFR, FOS, ATP1A1, THBS1, AGT, SOCS2, ZFP36, MYC, PGR, SLIT3, EZR	107	1204	20010	2.0192	1	0.236973	0.221376
	GOTERM_BP_FAT	GO:0034330~cell junction organization	6	5.40541	0.0255581	CSF1R, PARD6B, LRP1, PRTN3, AGT, WNT4	107	313	20010	3.58484	1	0.237087	0.221482
	GOTERM_BP_FAT	GO:0097028~dendritic cell differentiation	3	2.7027	0.0257401	AXL, PRTN3, GAS6	107	47	20010	11.9368	1	0.237581	0.221944
	GOTERM_BP_FAT	GO:0090184~positive regulation of kidney development	3	2.7027	0.0257401	MYC, AGT, WNT4	107	47	20010	11.9368	1	0.237581	0.221944
	GOTERM_BP_FAT	GO:0006869~lipid transport	7	6.30631	0.0258493	SLC9A3R1, APOL9B, PLA2G2D, APOL9A, LRP1, THBS1, AGT	107	426	20010	3.07292	1	0.237994	0.222329
	GOTERM_BP_FAT	GO:0030282~bone mineralization	4	3.6036	0.0259628	OSR1, TMEM119, ISG15, WNT4	107	120	20010	6.23364	1	0.238445	0.222751
	GOTERM_BP_FAT	GO:0072162~metanephric mesenchymal cell differentiation	2	1.8018	0.0262102	OSR1, WNT4	107	5	20010	74.8037	1	0.239525	0.22376
	GOTERM_BP_FAT	GO:0035283~central nervous system segmentation	2	1.8018	0.0262102	EGR2, MAFB	107	5	20010	74.8037	1	0.239525	0.22376
	GOTERM_BP_FAT	GO:0002700~regulation of production of molecular mediator of immune response	5	4.5045	0.026334	SPON2, H2-T23, CD74, AXL, IL4RA	107	212	20010	4.4106	1	0.240062	0.224262
	GOTERM_BP_FAT	GO:0030336~negative regulation of cell migration	6	5.40541	0.0264881	CD74, SLC9A3R1, LRP1, THBS1, NBL1, WNT4	107	316	20010	3.55081	1	0.240596	0.224761
	GOTERM_BP_FAT	GO:0001823~mesonephros development	4	3.6036	0.0265229	MYC, OSR1, AGT, WNT4	107	121	20010	6.18213	1	0.240596	0.224761
	GOTERM_BP_FAT	GO:0043066~negative regulation of apoptotic process	12	10.8108	0.0267328	CSF1R, CD74, LRP1, AXL, MYC, OSR1, CTSH, PGR, GAS6, THBS1, AGT, WNT4	107	1073	20010	2.09144	1	0.24163	0.225727
	GOTERM_BP_FAT	GO:0045923~positive regulation of fatty acid metabolic process	3	2.7027	0.0267678	CD74, IRS1, AGT	107	48	20010	11.6881	1	0.24163	0.225727
	GOTERM_BP_FAT	GO:1904035~regulation of epithelial cell apoptotic process	4	3.6036	0.0270895	ZFP36, PGR, GAS6, THBS1	107	122	20010	6.13145	1	0.243938	0.227882
	GOTERM_BP_FAT	GO:0007162~negative regulation of cell adhesion	6	5.40541	0.0274395	CD74, PLA2G2D, LRP1, IL4RA, THBS1, H2-AB1	107	319	20010	3.51742	1	0.24618	0.229977
	GOTERM_BP_FAT	GO:0032147~activation of protein kinase activity	5	4.5045	0.0275386	CD74, IGFBP6, GAS6, THBS1, AGT	107	215	20010	4.34905	1	0.24618	0.229977
	GOTERM_BP_FAT	GO:0071356~cellular response to tumor necrosis factor	5	4.5045	0.0275386	ZFP36, CCL8, KRT8, GAS6, THBS1	107	215	20010	4.34905	1	0.24618	0.229977
	GOTERM_BP_FAT	GO:0051046~regulation of secretion	10	9.00901	0.0280371	CD74, SLC9A3R1, ANO1, LRP1, IRS1, MYO5B, PTAFR, IL4RA, EZR, AGT	107	810	20010	2.30876	1	0.250031	0.233575
	GOTERM_BP_FAT	GO:0031401~positive regulation of protein modification process	14	12.6126	0.0282035	CSF1R, CD74, LRP1, GM12248, WWC1, MMD2, THBS1, AGT, CCL8, TMEM119, RSPO1, IGFBP6, GAS6, PTPN5	107	1365	20010	1.91804	1	0.250909	0.234395
	GOTERM_BP_FAT	GO:0046890~regulation of lipid biosynthetic process	5	4.5045	0.0283597	CD74, SIK1, ATP1A1, AGT, WNT4	107	217	20010	4.30897	1	0.251692	0.235127
	GOTERM_BP_FAT	GO:0009628~response to abiotic stimulus	14	12.6126	0.0284967	ERRFI1, PTGIS, PTAFR, KRT8, PLOD2, FOS, AQP5, ATP1A1, THBS1, CTSS, AGT, ANO1, MYC, SIK1	107	1367	20010	1.91524	1	0.252302	0.235696
	GOTERM_BP_FAT	GO:0022008~neurogenesis	18	16.2162	0.0286523	C1QA, CSF1R, EGR2, LRP1, MMD2, AGT, FBXO31, SOCS2, MYCL, SLC9A3R1, AXL, MYC, MYO5B, SLIT3, GAS6, NBL1, PTPN5, WNT4	107	1961	20010	1.71656	1	0.253072	0.236416
	GOTERM_BP_FAT	GO:0031644~regulation of neurological system process	4	3.6036	0.0288279	EGR2, PTAFR, CTSS, AGT	107	125	20010	5.9843	1	0.253802	0.237097
	GOTERM_BP_FAT	GO:0045646~regulation of erythrocyte differentiation	3	2.7027	0.0288723	ZFP36, MAFB, ISG15	107	50	20010	11.2206	1	0.253802	0.237097
	GOTERM_BP_FAT	GO:0022409~positive regulation of cell-cell adhesion	6	5.40541	0.0290732	H2-T23, CD74, H2-EB1, PTAFR, IL4RA, H2-AB1	107	324	20010	3.46314	1	0.254395	0.237651
	GOTERM_BP_FAT	GO:1901652~response to peptide	8	7.20721	0.0291489	SOCS2, ERRFI1, ANO1, EGR2, LRP1, IRS1, MYC, AGT	107	559	20010	2.67634	1	0.254395	0.237651
	GOTERM_BP_FAT	GO:0048732~gland development	8	7.20721	0.0293933	SOCS2, SLC9A3R1, MAFB, IRS1, MYC, PGR, RXFP1, WNT4	107	560	20010	2.67156	1	0.254395	0.237651
	GOTERM_BP_FAT	GO:0090287~regulation of cellular response to growth factor stimulus	6	5.40541	0.0294072	LRP1, HTRA1, THBS1, NBL1, AGT, WNT4	107	325	20010	3.45248	1	0.254395	0.237651
	GOTERM_BP_FAT	GO:0019079~viral genome replication	4	3.6036	0.0294203	CCL8, OAS3, ISG15, GAS6	107	126	20010	5.9368	1	0.254395	0.237651
	GOTERM_BP_FAT	GO:0048145~regulation of fibroblast proliferation	4	3.6036	0.0294203	CD74, MYC, GAS6, AGT	107	126	20010	5.9368	1	0.254395	0.237651
	GOTERM_BP_FAT	GO:0060548~negative regulation of cell death	13	11.7117	0.0294222	CSF1R, CD74, LRP1, OSR1, THBS1, AGT, AXL, MYC, CCN5, CTSH, PGR, GAS6, WNT4	107	1230	20010	1.97652	1	0.254395	0.237651
	GOTERM_BP_FAT	GO:0022414~reproductive process	18	16.2162	0.0299023	ZMYND15, PTGIS, OSR1, PTAFR, KRT8, HTRA1, FOS, RXFP1, AGT, KRT19, AXL, MYC, TMEM119, PGR, SLIT3, RSPO1, FOLR2, WNT4	107	1971	20010	1.70785	1	0.257506	0.240557
	GOTERM_BP_FAT	GO:0045860~positive regulation of protein kinase activity	7	6.30631	0.0299215	CSF1R, CD74, MMD2, IGFBP6, GAS6, THBS1, AGT	107	441	20010	2.9684	1	0.257506	0.240557
	GOTERM_BP_FAT	GO:0014812~muscle cell migration	4	3.6036	0.0300191	LRP1, MYC, PGR, AGT	107	127	20010	5.89006	1	0.257686	0.240726
	GOTERM_BP_FAT	GO:0090596~sensory organ morphogenesis	6	5.40541	0.0300825	SLC9A3R1, MAFB, MYC, OSR1, RPL38, AQP5	107	327	20010	3.43136	1	0.257686	0.240726
	GOTERM_BP_FAT	GO:0000003~reproduction	18	16.2162	0.0301572	ZMYND15, PTGIS, OSR1, PTAFR, KRT8, HTRA1, FOS, RXFP1, AGT, KRT19, AXL, MYC, TMEM119, PGR, SLIT3, RSPO1, FOLR2, WNT4	107	1973	20010	1.70612	1	0.257686	0.240726
	GOTERM_BP_FAT	GO:0043069~negative regulation of programmed cell death	12	10.8108	0.0302216	CSF1R, CD74, LRP1, AXL, MYC, OSR1, CTSH, PGR, GAS6, THBS1, AGT, WNT4	107	1094	20010	2.05129	1	0.257686	0.240726
	GOTERM_BP_FAT	GO:0002694~regulation of leukocyte activation	10	9.00901	0.0306152	H2-T23, CD74, H2-EB1, PLA2G2D, AXL, PTAFR, IL4RA, GAS6, THBS1, H2-AB1	107	823	20010	2.27229	1	0.25883	0.241794
	GOTERM_BP_FAT	GO:0014065~phosphatidylinositol 3-kinase signaling	4	3.6036	0.0306243	SLC9A3R1, IRS1, PIK3AP1, AGT	107	128	20010	5.84404	1	0.25883	0.241794
	GOTERM_BP_FAT	GO:0010927~cellular component assembly involved in morphogenesis	4	3.6036	0.0306243	KRT19, CSRP2, KRT8, FLNC	107	128	20010	5.84404	1	0.25883	0.241794
	GOTERM_BP_FAT	GO:0051051~negative regulation of transport	8	7.20721	0.0306361	CD74, SLC9A3R1, LRP1, IRS1, MYC, OSR1, PRTN3, THBS1	107	565	20010	2.64792	1	0.25883	0.241794
	GOTERM_BP_FAT	GO:0051246~regulation of protein metabolic process	25	22.5225	0.0307626	ERRFI1, CSF1R, LRP1, WWC1, GM12248, RPLP1, PTAFR, THBS1, SLC9A3R1, ZFP36, CCL8, MYC, CTSH, RPL38, RSPO1, IGFBP6, CD74, ISG15, MMD2, PTPN13, AGT, TMEM119, EZR, GAS6, PTPN5	107	3080	20010	1.51793	1	0.259305	0.242238
	GOTERM_BP_FAT	GO:0071364~cellular response to epidermal growth factor stimulus	3	2.7027	0.0310409	ERRFI1, ZFP36, MYC	107	52	20010	10.789	1	0.260353	0.243217
	GOTERM_BP_FAT	GO:0002888~positive regulation of myeloid leukocyte mediated immunity	3	2.7027	0.0310409	H2-T23, PTAFR, IL4RA	107	52	20010	10.789	1	0.260353	0.243217
	GOTERM_BP_FAT	GO:0051336~regulation of hydrolase activity	12	10.8108	0.0310985	CCL8, LRP1, OAS3, MYC, PTAFR, CTSH, PRTN3, GAS6, THBS1, AGT, WNT4, MTSS2	107	1099	20010	2.04196	1	0.260353	0.243217
	GOTERM_BP_FAT	GO:0021782~glial cell development	4	3.6036	0.031236	CSF1R, C1QA, LRP1, AGT	107	129	20010	5.79874	1	0.260912	0.243739
	GOTERM_BP_FAT	GO:2000146~negative regulation of cell motility	6	5.40541	0.0314623	CD74, SLC9A3R1, LRP1, THBS1, NBL1, WNT4	107	331	20010	3.3899	1	0.26221	0.244952
	GOTERM_BP_FAT	GO:0040007~growth	12	10.8108	0.0316334	SOCS2, CSF1R, LRP1, WWC1, MYO5B, CCN5, SLIT3, EZR, THBS1, AGT, RERG, CXCL16	107	1102	20010	2.0364	1	0.263042	0.245729
	GOTERM_BP_FAT	GO:0010243~response to organonitrogen compound	12	10.8108	0.0318131	SOCS2, ERRFI1, ANO1, EGR2, LRP1, IRS1, MYC, PTAFR, PGR, FOS, EZR, AGT	107	1103	20010	2.03455	1	0.263942	0.24657
	GOTERM_BP_FAT	GO:0061138~morphogenesis of a branching epithelium	5	4.5045	0.0322348	MYC, CTSH, PGR, AGT, WNT4	107	226	20010	4.13737	1	0.266426	0.248891
	GOTERM_BP_FAT	GO:0050678~regulation of epithelial cell proliferation	7	6.30631	0.0322569	ERRFI1, ZFP36, MYC, OSR1, HTRA1, PGR, THBS1	107	449	20010	2.91551	1	0.266426	0.248891
	GOTERM_BP_FAT	GO:0002718~regulation of cytokine production involved in immune response	4	3.6036	0.0324785	SPON2, H2-T23, CD74, AXL	107	131	20010	5.71021	1	0.267658	0.250041
	GOTERM_BP_FAT	GO:0060429~epithelium development	14	12.6126	0.0328421	ERRFI1, OSR1, KRT8, AGT, MYCL, SLC9A3R1, ZFP36, KRT19, MAFB, MYC, CTSH, PGR, EZR, WNT4	107	1395	20010	1.8768	1	0.269589	0.251845
	GOTERM_BP_FAT	GO:0001933~negative regulation of protein phosphorylation	7	6.30631	0.0328589	ERRFI1, SLC9A3R1, LRP1, PTPN13, EZR, PTPN5, AGT	107	451	20010	2.90258	1	0.269589	0.251845
	GOTERM_BP_FAT	GO:0050866~negative regulation of cell activation	5	4.5045	0.0331361	CD74, PLA2G2D, AXL, IL4RA, H2-AB1	107	228	20010	4.10108	1	0.271261	0.253407
	GOTERM_BP_FAT	GO:0007160~cell-matrix adhesion	5	4.5045	0.0335923	SNED1, LRP1, THBS1, AGT, WNT4	107	229	20010	4.08317	1	0.273178	0.255198
	GOTERM_BP_FAT	GO:0055001~muscle cell development	5	4.5045	0.0335923	KRT19, CSRP2, KRT8, FLNC, AGT	107	229	20010	4.08317	1	0.273178	0.255198
	GOTERM_BP_FAT	GO:0002218~activation of innate immune response	5	4.5045	0.0335923	ZBP1, OAS3, IFI213, IFI211, PIK3AP1	107	229	20010	4.08317	1	0.273178	0.255198
	GOTERM_BP_FAT	GO:0072009~nephron epithelium development	4	3.6036	0.0337466	MYC, OSR1, AGT, WNT4	107	133	20010	5.62434	1	0.27383	0.255807
	GOTERM_BP_FAT	GO:0042098~T cell proliferation	5	4.5045	0.0340521	H2-T23, PLA2G2D, MYC, H2-AB1, WNT4	107	230	20010	4.06542	1	0.275703	0.257557
	GOTERM_BP_FAT	GO:0002444~myeloid leukocyte mediated immunity	4	3.6036	0.0350403	SPON2, H2-T23, PTAFR, IL4RA	107	135	20010	5.54102	1	0.283082	0.26445
	GOTERM_BP_FAT	GO:0071417~cellular response to organonitrogen compound	9	8.10811	0.0351619	SOCS2, ERRFI1, ANO1, LRP1, IRS1, MYC, PTAFR, EZR, AGT	107	711	20010	2.36721	1	0.283445	0.264789
	GOTERM_BP_FAT	GO:0032814~regulation of natural killer cell activation	3	2.7027	0.0355637	H2-T23, AXL, GAS6	107	56	20010	10.0184	1	0.286059	0.267232
	GOTERM_BP_FAT	GO:0051153~regulation of striated muscle cell differentiation	4	3.6036	0.0356966	CCL8, TMEM119, IL4RA, SIK1	107	136	20010	5.50027	1	0.286504	0.267647
	GOTERM_BP_FAT	GO:1901699~cellular response to nitrogen compound	10	9.00901	0.0362631	SOCS2, ERRFI1, ANO1, LRP1, IRS1, MYC, PTAFR, EZR, THBS1, AGT	107	849	20010	2.2027	1	0.290395	0.271282
	GOTERM_BP_FAT	GO:0050868~negative regulation of T cell activation	4	3.6036	0.0363593	CD74, PLA2G2D, IL4RA, H2-AB1	107	137	20010	5.46013	1	0.290395	0.271282
	GOTERM_BP_FAT	GO:0060745~mammary gland branching involved in pregnancy	2	1.8018	0.0365027	PGR, WNT4	107	7	20010	53.4312	1	0.290395	0.271282
	GOTERM_BP_FAT	GO:0051599~response to hydrostatic pressure	2	1.8018	0.0365027	MYC, KRT8	107	7	20010	53.4312	1	0.290395	0.271282
	GOTERM_BP_FAT	GO:0010463~mesenchymal cell proliferation	3	2.7027	0.036732	IRS1, MYC, OSR1	107	57	20010	9.8426	1	0.290395	0.271282
	GOTERM_BP_FAT	GO:0070849~response to epidermal growth factor	3	2.7027	0.036732	ERRFI1, ZFP36, MYC	107	57	20010	9.8426	1	0.290395	0.271282
	GOTERM_BP_FAT	GO:0048247~lymphocyte chemotaxis	3	2.7027	0.036732	CCL8, GAS6, CXCL16	107	57	20010	9.8426	1	0.290395	0.271282
	GOTERM_BP_FAT	GO:0070374~positive regulation of ERK1 and ERK2 cascade	5	4.5045	0.037374	CSF1R, CD74, CCL8, LRP1, GAS6	107	237	20010	3.94534	1	0.294839	0.275434
	GOTERM_BP_FAT	GO:1901698~response to nitrogen compound	13	11.7117	0.0376463	ERRFI1, EGR2, LRP1, IRS1, PTAFR, FOS, THBS1, AGT, SOCS2, ANO1, MYC, PGR, EZR	107	1277	20010	1.90378	1	0.296354	0.276849
	GOTERM_BP_FAT	GO:0051130~positive regulation of cellular component organization	15	13.5135	0.0377982	LRP1, IL4RA, ISG15, CFP, AGT, FBXO31, C4B, CCL8, AXL, MYC, MYO5B, EZR, GAS6, PTPN5, WNT4	107	1572	20010	1.78444	1	0.296897	0.277356
	GOTERM_BP_FAT	GO:0060337~type I interferon signaling pathway	3	2.7027	0.037915	ZBP1, OAS3, ISG15	107	58	20010	9.6729	1	0.296897	0.277356
	GOTERM_BP_FAT	GO:0030036~actin cytoskeleton organization	9	8.10811	0.0379566	CSF1R, SLC9A3R1, KRT19, CSRP2, MYO5B, KRT8, FLNC, EZR, WNT4	107	722	20010	2.33114	1	0.296897	0.277356
	GOTERM_BP_FAT	GO:0050920~regulation of chemotaxis	5	4.5045	0.038853	CSF1R, CD74, GAS6, THBS1, NBL1	107	240	20010	3.89603	1	0.30084	0.281039
	GOTERM_BP_FAT	GO:0051604~protein maturation	6	5.40541	0.0389551	MAFB, MYC, CTSH, CPZ, THBS1, CTSS	107	351	20010	3.19674	1	0.30084	0.281039
	GOTERM_BP_FAT	GO:0044070~regulation of anion transport	4	3.6036	0.0390733	OSR1, PTAFR, THBS1, AGT	107	141	20010	5.30523	1	0.30084	0.281039
	GOTERM_BP_FAT	GO:0002762~negative regulation of myeloid leukocyte differentiation	3	2.7027	0.0391125	MAFB, MYC, C1QC	107	59	20010	9.50895	1	0.30084	0.281039
	GOTERM_BP_FAT	GO:0032964~collagen biosynthetic process	3	2.7027	0.0391125	ERRFI1, P3H4, WNT4	107	59	20010	9.50895	1	0.30084	0.281039
	GOTERM_BP_FAT	GO:0045604~regulation of epidermal cell differentiation	3	2.7027	0.0391125	MYCL, ERRFI1, ZFP36	107	59	20010	9.50895	1	0.30084	0.281039
	GOTERM_BP_FAT	GO:0071675~regulation of mononuclear cell migration	3	2.7027	0.0391125	CSF1R, THBS1, NBL1	107	59	20010	9.50895	1	0.30084	0.281039
	GOTERM_BP_FAT	GO:0071622~regulation of granulocyte chemotaxis	3	2.7027	0.0391125	CSF1R, CD74, THBS1	107	59	20010	9.50895	1	0.30084	0.281039
	GOTERM_BP_FAT	GO:0071357~cellular response to type I interferon	3	2.7027	0.0403242	ZBP1, OAS3, ISG15	107	60	20010	9.35047	1	0.308234	0.287947
	GOTERM_BP_FAT	GO:0050832~defense response to fungus	3	2.7027	0.0403242	ZBP1, SPON2, IL17RA	107	60	20010	9.35047	1	0.308234	0.287947
	GOTERM_BP_FAT	GO:2001238~positive regulation of extrinsic apoptotic signaling pathway	3	2.7027	0.0403242	SIGLEC1, THBS1, AGT	107	60	20010	9.35047	1	0.308234	0.287947
	GOTERM_BP_FAT	GO:0048144~fibroblast proliferation	4	3.6036	0.040468	CD74, MYC, GAS6, AGT	107	143	20010	5.23103	1	0.308694	0.288376
	GOTERM_BP_FAT	GO:0035458~cellular response to interferon-beta	3	2.7027	0.0415501	IFI213, IFI211, IIGP1	107	61	20010	9.19718	1	0.310969	0.290501
	GOTERM_BP_FAT	GO:0006692~prostanoid metabolic process	3	2.7027	0.0415501	CD74, PTGIS, AKR1CL	107	61	20010	9.19718	1	0.310969	0.290501
	GOTERM_BP_FAT	GO:0006693~prostaglandin metabolic process	3	2.7027	0.0415501	CD74, PTGIS, AKR1CL	107	61	20010	9.19718	1	0.310969	0.290501
	GOTERM_BP_FAT	GO:0034220~ion transmembrane transport	11	9.90991	0.0415628	KCNK5, SLC9A3R1, ANO1, MYC, OSR1, PTAFR, ATP1A1, GAS6, THBS1, CTSS, AGT	107	1010	20010	2.03674	1	0.310969	0.290501
	GOTERM_BP_FAT	GO:2000669~negative regulation of dendritic cell apoptotic process	2	1.8018	0.0416085	AXL, GAS6	107	8	20010	46.7523	1	0.310969	0.290501
	GOTERM_BP_FAT	GO:2001012~mesenchymal cell differentiation involved in renal system development	2	1.8018	0.0416085	OSR1, WNT4	107	8	20010	46.7523	1	0.310969	0.290501
	GOTERM_BP_FAT	GO:0009629~response to gravity	2	1.8018	0.0416085	PTAFR, FOS	107	8	20010	46.7523	1	0.310969	0.290501
	GOTERM_BP_FAT	GO:0032353~negative regulation of hormone biosynthetic process	2	1.8018	0.0416085	ATP1A1, WNT4	107	8	20010	46.7523	1	0.310969	0.290501
	GOTERM_BP_FAT	GO:0072161~mesenchymal cell differentiation involved in kidney development	2	1.8018	0.0416085	OSR1, WNT4	107	8	20010	46.7523	1	0.310969	0.290501
	GOTERM_BP_FAT	GO:1903789~regulation of amino acid transmembrane transport	2	1.8018	0.0416085	OSR1, AGT	107	8	20010	46.7523	1	0.310969	0.290501
	GOTERM_BP_FAT	GO:0014902~myotube differentiation	4	3.6036	0.0418877	CCL8, MYC, TMEM119, IL4RA	107	145	20010	5.15888	1	0.311793	0.291272
	GOTERM_BP_FAT	GO:0002702~positive regulation of production of molecular mediator of immune response	4	3.6036	0.0418877	SPON2, H2-T23, CD74, IL4RA	107	145	20010	5.15888	1	0.311793	0.291272
	GOTERM_BP_FAT	GO:0032102~negative regulation of response to external stimulus	6	5.40541	0.0422332	ZFP36, PTGIS, HTRA1, THBS1, NBL1, WNT4	107	359	20010	3.1255	1	0.313733	0.293083
	GOTERM_BP_FAT	GO:0046651~lymphocyte proliferation	6	5.40541	0.0426544	H2-T23, CD74, PLA2G2D, MYC, H2-AB1, WNT4	107	360	20010	3.11682	1	0.316225	0.295412
	GOTERM_BP_FAT	GO:0042180~cellular ketone metabolic process	5	4.5045	0.0429594	CD74, AKR1CL, IRS1, AGT, WNT4	107	248	20010	3.77035	1	0.317848	0.296927
	GOTERM_BP_FAT	GO:0010876~lipid localization	7	6.30631	0.0431374	SLC9A3R1, APOL9B, PLA2G2D, APOL9A, LRP1, THBS1, AGT	107	482	20010	2.7159	1	0.318527	0.297562
	GOTERM_BP_FAT	GO:0045621~positive regulation of lymphocyte differentiation	4	3.6036	0.0433324	CD74, AXL, IL4RA, GAS6	107	147	20010	5.08869	1	0.318967	0.297973
	GOTERM_BP_FAT	GO:0050865~regulation of cell activation	10	9.00901	0.0433698	H2-T23, CD74, H2-EB1, PLA2G2D, AXL, PTAFR, IL4RA, GAS6, THBS1, H2-AB1	107	878	20010	2.12995	1	0.318967	0.297973
	GOTERM_BP_FAT	GO:0050767~regulation of neurogenesis	11	9.90991	0.0434597	SOCS2, MYCL, EGR2, LRP1, MYC, MYO5B, MMD2, PTPN5, NBL1, AGT, FBXO31	107	1018	20010	2.02073	1	0.318992	0.297997
	GOTERM_BP_FAT	GO:0032943~mononuclear cell proliferation	6	5.40541	0.0439332	H2-T23, CD74, PLA2G2D, MYC, H2-AB1, WNT4	107	363	20010	3.09106	1	0.321361	0.300209
	GOTERM_BP_FAT	GO:0050870~positive regulation of T cell activation	5	4.5045	0.0440229	H2-T23, CD74, H2-EB1, IL4RA, H2-AB1	107	250	20010	3.74019	1	0.321361	0.300209
	GOTERM_BP_FAT	GO:1903078~positive regulation of protein localization to plasma membrane	3	2.7027	0.0440435	LRP1, MYO5B, EZR	107	63	20010	8.90521	1	0.321361	0.300209
	GOTERM_BP_FAT	GO:0006956~complement activation	5	4.5045	0.0445602	C1QB, C4B, C1QA, CFP, C1QC	107	251	20010	3.72529	1	0.32449	0.303132
	GOTERM_BP_FAT	GO:0051271~negative regulation of cellular component movement	6	5.40541	0.045235	CD74, SLC9A3R1, LRP1, THBS1, NBL1, WNT4	107	366	20010	3.06573	1	0.328109	0.306514
	GOTERM_BP_FAT	GO:0008202~steroid metabolic process	6	5.40541	0.045235	AKR1CL, LRP1, GM12248, ATP1A1, AGT, WNT4	107	366	20010	3.06573	1	0.328109	0.306514
	GOTERM_BP_FAT	GO:0051345~positive regulation of hydrolase activity	8	7.20721	0.0453777	CCL8, MYC, PTAFR, CTSH, PRTN3, AGT, WNT4, MTSS2	107	616	20010	2.42869	1	0.328427	0.306811
	GOTERM_BP_FAT	GO:0007292~female gamete generation	4	3.6036	0.0455457	MYC, PGR, AGT, WNT4	107	150	20010	4.98692	1	0.328427	0.306811
	GOTERM_BP_FAT	GO:0098739~import across plasma membrane	4	3.6036	0.0455457	KCNK5, SLC9A3R1, ATP1A1, AGT	107	150	20010	4.98692	1	0.328427	0.306811
	GOTERM_BP_FAT	GO:0001763~morphogenesis of a branching structure	5	4.5045	0.0456459	MYC, CTSH, PGR, AGT, WNT4	107	253	20010	3.69584	1	0.328508	0.306886
	GOTERM_BP_FAT	GO:0044057~regulation of system process	8	7.20721	0.0460349	ERRFI1, SLC9A3R1, EGR2, PTAFR, ATP1A1, GAS6, CTSS, AGT	107	618	20010	2.42083	1	0.330663	0.3089
	GOTERM_BP_FAT	GO:0007565~female pregnancy	5	4.5045	0.0461943	PTGIS, PGR, FOS, AGT, WNT4	107	254	20010	3.68129	1	0.330845	0.309069
	GOTERM_BP_FAT	GO:1903038~negative regulation of leukocyte cell-cell adhesion	4	3.6036	0.0462958	CD74, PLA2G2D, IL4RA, H2-AB1	107	151	20010	4.95389	1	0.330845	0.309069
	GOTERM_BP_FAT	GO:0010517~regulation of phospholipase activity	3	2.7027	0.0465911	LRP1, PTAFR, AGT	107	65	20010	8.6312	1	0.330845	0.309069
	GOTERM_BP_FAT	GO:0017185~peptidyl-lysine hydroxylation	2	1.8018	0.0466875	PLOD2, P3H4	107	9	20010	41.5576	1	0.330845	0.309069
	GOTERM_BP_FAT	GO:0031946~regulation of glucocorticoid biosynthetic process	2	1.8018	0.0466875	ATP1A1, WNT4	107	9	20010	41.5576	1	0.330845	0.309069
	GOTERM_BP_FAT	GO:0021546~rhombomere development	2	1.8018	0.0466875	EGR2, MAFB	107	9	20010	41.5576	1	0.330845	0.309069
	GOTERM_BP_FAT	GO:0015670~carbon dioxide transport	2	1.8018	0.0466875	AQP5, CAR12	107	9	20010	41.5576	1	0.330845	0.309069
	GOTERM_BP_FAT	GO:0015711~organic anion transport	7	6.30631	0.046841	SLC9A3R1, PLA2G2D, MYC, OSR1, FOLR2, THBS1, AGT	107	492	20010	2.6607	1	0.331297	0.309491
	GOTERM_BP_FAT	GO:0030182~neuron differentiation	15	13.5135	0.0471227	C1QA, CSF1R, EGR2, LRP1, MMD2, AGT, FBXO31, SOCS2, MYCL, SLC9A3R1, MYO5B, SLIT3, NBL1, PTPN5, WNT4	107	1622	20010	1.72943	1	0.332652	0.310758
	GOTERM_BP_FAT	GO:0098542~defense response to other organism	10	9.00901	0.0473926	ZBP1, SPON2, H2-T23, OAS3, HTRA1, IL4RA, ISG15, MPEG1, IIGP1, IL17RA	107	893	20010	2.09417	1	0.333919	0.311941
	GOTERM_BP_FAT	GO:0044702~single organism reproductive process	16	14.4144	0.0476039	ZMYND15, PTGIS, OSR1, PTAFR, KRT8, HTRA1, AGT, KRT19, AXL, MYC, TMEM119, PGR, SLIT3, RSPO1, FOLR2, WNT4	107	1777	20010	1.68382	1	0.334768	0.312735
	GOTERM_BP_FAT	GO:0034340~response to type I interferon	3	2.7027	0.0491917	ZBP1, OAS3, ISG15	107	67	20010	8.37355	1	0.345277	0.322552
	GOTERM_BP_FAT	GO:0034101~erythrocyte homeostasis	4	3.6036	0.0493573	ZFP36, MAFB, AXL, ISG15	107	155	20010	4.82605	1	0.345782	0.323023
	GOTERM_BP_FAT	GO:0046649~lymphocyte activation	11	9.90991	0.0497691	H2-T23, CD74, H2-EB1, PLA2G2D, MAFB, AXL, MYC, IL4RA, GAS6, H2-AB1, WNT4	107	1043	20010	1.97229	1	0.348006	0.325101
	GOTERM_BP_FAT	GO:0042592~homeostatic process	18	16.2162	0.0504894	CSF1R, CD74, LRP1, ISG15, ATP1A1, CTSS, AGT, ANO1, SLC9A3R1, ZFP36, MAFB, CCL8, AXL, MYC, TMEM119, CTSH, CAR12, GAS6	107	2103	20010	1.60065	1	0.351202	0.328086
	GOTERM_BP_FAT	GO:0051055~negative regulation of lipid biosynthetic process	3	2.7027	0.0505114	SIK1, ATP1A1, WNT4	107	68	20010	8.25041	1	0.351202	0.328086
	GOTERM_BP_FAT	GO:0001658~branching involved in ureteric bud morphogenesis	3	2.7027	0.0505114	MYC, AGT, WNT4	107	68	20010	8.25041	1	0.351202	0.328086
	GOTERM_BP_FAT	GO:0009615~response to virus	6	5.40541	0.0506722	ZBP1, SPON2, OAS3, HTRA1, ISG15, IL17RA	107	378	20010	2.9684	1	0.351657	0.328512
	GOTERM_BP_FAT	GO:0033554~cellular response to stress	18	16.2162	0.0510522	ERRFI1, CD74, PTGIS, LRP1, FOS, AQP5, THBS1, AGT, FBXO31, ANO1, ZFP36, AXL, MYC, SIK1, IGFBP6, EZR, GAS6, WNT4	107	2106	20010	1.59837	1	0.35363	0.330355
	GOTERM_BP_FAT	GO:0032944~regulation of mononuclear cell proliferation	5	4.5045	0.0512955	H2-T23, CSF1R, CD74, PLA2G2D, H2-AB1	107	263	20010	3.55531	1	0.354403	0.331077
	GOTERM_BP_FAT	GO:0042326~negative regulation of phosphorylation	7	6.30631	0.05154	ERRFI1, SLC9A3R1, LRP1, PTPN13, EZR, PTPN5, AGT	107	504	20010	2.59735	1	0.354403	0.331077
	GOTERM_BP_FAT	GO:0042063~gliogenesis	6	5.40541	0.0516143	CSF1R, C1QA, EGR2, LRP1, MYC, AGT	107	380	20010	2.95278	1	0.354403	0.331077
	GOTERM_BP_FAT	GO:0050921~positive regulation of chemotaxis	4	3.6036	0.051717	CSF1R, CD74, GAS6, THBS1	107	158	20010	4.73441	1	0.354403	0.331077
	GOTERM_BP_FAT	GO:0002604~regulation of dendritic cell antigen processing and presentation	2	1.8018	0.0517398	CD74, THBS1	107	10	20010	37.4019	1	0.354403	0.331077
	GOTERM_BP_FAT	GO:0032351~negative regulation of hormone metabolic process	2	1.8018	0.0517398	ATP1A1, WNT4	107	10	20010	37.4019	1	0.354403	0.331077
	GOTERM_BP_FAT	GO:0045071~negative regulation of viral genome replication	3	2.7027	0.0518438	CCL8, OAS3, ISG15	107	69	20010	8.13084	1	0.354458	0.331128
	GOTERM_BP_FAT	GO:0055085~transmembrane transport	13	11.7117	0.0527548	KCNK5, OSR1, PTAFR, TAP1, AQP5, ATP1A1, THBS1, CTSS, AGT, ANO1, SLC9A3R1, MYC, GAS6	107	1347	20010	1.80484	1	0.359381	0.335727
	GOTERM_BP_FAT	GO:0060537~muscle tissue development	7	6.30631	0.0527585	EGR2, CSRP2, MYC, OSR1, SIK1, FOS, AGT	107	507	20010	2.58198	1	0.359381	0.335727
	GOTERM_BP_FAT	GO:0016049~cell growth	7	6.30631	0.0531686	CSF1R, LRP1, MYO5B, SLIT3, AGT, RERG, CXCL16	107	508	20010	2.5769	1	0.360317	0.336602
	GOTERM_BP_FAT	GO:0032720~negative regulation of tumor necrosis factor production	3	2.7027	0.0531888	ERRFI1, AXL, GAS6	107	70	20010	8.01469	1	0.360317	0.336602
	GOTERM_BP_FAT	GO:1904377~positive regulation of protein localization to cell periphery	3	2.7027	0.0531888	LRP1, MYO5B, EZR	107	70	20010	8.01469	1	0.360317	0.336602
	GOTERM_BP_FAT	GO:0010604~positive regulation of macromolecule metabolic process	27	24.3243	0.0533905	CSF1R, CEBPD, LRP1, IRS1, WWC1, GM12248, PTAFR, THBS1, ZFP36, CCL8, MYC, CTSH, RSPO1, IGFBP6, WNT4, CD74, EGR2, OSR1, MMD2, FOS, AGT, MAFB, TMEM119, PGR, EZR, GAS6, PTPN5	107	3586	20010	1.40805	1	0.361022	0.33726
	GOTERM_BP_FAT	GO:0071560~cellular response to transforming growth factor beta stimulus	5	4.5045	0.0536583	LRP1, HTRA1, FOS, THBS1, WNT4	107	267	20010	3.50205	1	0.362169	0.338332
	GOTERM_BP_FAT	GO:0006629~lipid metabolic process	14	12.6126	0.0539249	CSF1R, CD74, PLA2G2D, AKR1CL, PTGIS, LRP1, IRS1, PLPPR3, GM12248, ATP1A1, AGT, SOCS2, SIK1, WNT4	107	1502	20010	1.7431	1	0.363245	0.339337
	GOTERM_BP_FAT	GO:0050863~regulation of T cell activation	6	5.40541	0.0540145	H2-T23, CD74, H2-EB1, PLA2G2D, IL4RA, H2-AB1	107	385	20010	2.91443	1	0.363245	0.339337
	GOTERM_BP_FAT	GO:0010565~regulation of cellular ketone metabolic process	4	3.6036	0.0541306	CD74, IRS1, AGT, WNT4	107	161	20010	4.64619	1	0.363364	0.339448
	GOTERM_BP_FAT	GO:0035456~response to interferon-beta	3	2.7027	0.0545461	IFI213, IFI211, IIGP1	107	71	20010	7.9018	1	0.365489	0.341433
	GOTERM_BP_FAT	GO:0031400~negative regulation of protein modification process	8	7.20721	0.0547712	ERRFI1, SLC9A3R1, LRP1, ISG15, PTPN13, EZR, PTPN5, AGT	107	643	20010	2.32671	1	0.366274	0.342166
	GOTERM_BP_FAT	GO:0009612~response to mechanical stimulus	5	4.5045	0.0548617	MYC, ATP1A1, FOS, THBS1, AGT	107	269	20010	3.47601	1	0.366274	0.342166
	GOTERM_BP_FAT	GO:0009893~positive regulation of metabolic process	29	26.1261	0.0550391	CSF1R, CEBPD, LRP1, IRS1, WWC1, GM12248, PTAFR, THBS1, RXFP1, ZFP36, CCL8, MYC, CTSH, RSPO1, IGFBP6, WNT4, CD74, EGR2, OSR1, MMD2, FOS, AGT, MAFB, AXL, TMEM119, PGR, EZR, GAS6, PTPN5	107	3934	20010	1.37856	1	0.366795	0.342653
	GOTERM_BP_FAT	GO:0060135~maternal process involved in female pregnancy	3	2.7027	0.0559156	PTGIS, PGR, WNT4	107	72	20010	7.79206	1	0.368976	0.344691
	GOTERM_BP_FAT	GO:1903556~negative regulation of tumor necrosis factor superfamily cytokine production	3	2.7027	0.0559156	ERRFI1, AXL, GAS6	107	72	20010	7.79206	1	0.368976	0.344691
	GOTERM_BP_FAT	GO:0040013~negative regulation of locomotion	6	5.40541	0.055981	CD74, SLC9A3R1, LRP1, THBS1, NBL1, WNT4	107	389	20010	2.88446	1	0.368976	0.344691
	GOTERM_BP_FAT	GO:0071214~cellular response to abiotic stimulus	6	5.40541	0.055981	ERRFI1, MYC, PTAFR, AQP5, ATP1A1, AGT	107	389	20010	2.88446	1	0.368976	0.344691
	GOTERM_BP_FAT	GO:0044092~negative regulation of molecular function	11	9.90991	0.0563835	ERRFI1, SLC9A3R1, ZFP36, PTGIS, MYC, OSR1, SIK1, GAS6, THBS1, PTPN5, AGT	107	1067	20010	1.92793	1	0.368976	0.344691
	GOTERM_BP_FAT	GO:0010634~positive regulation of epithelial cell migration	4	3.6036	0.0565977	IRS1, CTSH, THBS1, AGT	107	164	20010	4.5612	1	0.368976	0.344691
	GOTERM_BP_FAT	GO:0045926~negative regulation of growth	5	4.5045	0.0566941	SOCS2, WWC1, SLIT3, AGT, RERG	107	272	20010	3.43767	1	0.368976	0.344691
	GOTERM_BP_FAT	GO:0048588~developmental cell growth	5	4.5045	0.0566941	CSF1R, LRP1, MYO5B, SLIT3, AGT	107	272	20010	3.43767	1	0.368976	0.344691
	GOTERM_BP_FAT	GO:0071559~response to transforming growth factor beta	5	4.5045	0.0566941	LRP1, HTRA1, FOS, THBS1, WNT4	107	272	20010	3.43767	1	0.368976	0.344691
	GOTERM_BP_FAT	GO:0072203~cell proliferation involved in metanephros development	2	1.8018	0.0567655	MYC, OSR1	107	11	20010	34.0017	1	0.368976	0.344691
	GOTERM_BP_FAT	GO:0031943~regulation of glucocorticoid metabolic process	2	1.8018	0.0567655	ATP1A1, WNT4	107	11	20010	34.0017	1	0.368976	0.344691
	GOTERM_BP_FAT	GO:0045647~negative regulation of erythrocyte differentiation	2	1.8018	0.0567655	ZFP36, MAFB	107	11	20010	34.0017	1	0.368976	0.344691
	GOTERM_BP_FAT	GO:0002503~peptide antigen assembly with MHC class II protein complex	2	1.8018	0.0567655	H2-EB1, H2-AB1	107	11	20010	34.0017	1	0.368976	0.344691
	GOTERM_BP_FAT	GO:0002399~MHC class II protein complex assembly	2	1.8018	0.0567655	H2-EB1, H2-AB1	107	11	20010	34.0017	1	0.368976	0.344691
	GOTERM_BP_FAT	GO:0045596~negative regulation of cell differentiation	10	9.00901	0.0577321	CD74, ZFP36, MAFB, LRP1, MYC, OSR1, TMEM119, IL4RA, WNT4, C1QC	107	928	20010	2.01519	1	0.374599	0.349944
	GOTERM_BP_FAT	GO:0010468~regulation of gene expression	35	31.5315	0.0580604	ZMYND15, CEBPD, LRP1, IRS1, WWC1, RPLP1, PTAFR, HTRA1, AEBP1, AFF3, THBS1, ZFP36, MYC, CTSH, SLIT3, RPL38, RSPO1, WNT4, CD74, EGR2, PTGIS, SP110, OSR1, FOS, PTPN13, AGT, MYCL, MAFB, TMEM119, SIK1, PGR, EZR, GAS6, ZBTB8B, NBL1	107	4986	20010	1.31274	1	0.376069	0.351316
	GOTERM_BP_FAT	GO:0002886~regulation of myeloid leukocyte mediated immunity	3	2.7027	0.0586907	H2-T23, PTAFR, IL4RA	107	74	20010	7.58146	1	0.379485	0.354508
	GOTERM_BP_FAT	GO:0071902~positive regulation of protein serine/threonine kinase activity	5	4.5045	0.0591883	CSF1R, CD74, IGFBP6, THBS1, AGT	107	276	20010	3.38785	1	0.381367	0.356266
	GOTERM_BP_FAT	GO:0050730~regulation of peptidyl-tyrosine phosphorylation	5	4.5045	0.0591883	CSF1R, CD74, ERRFI1, GAS6, AGT	107	276	20010	3.38785	1	0.381367	0.356266
	GOTERM_BP_FAT	GO:0051251~positive regulation of lymphocyte activation	7	6.30631	0.0595544	H2-T23, CD74, H2-EB1, AXL, IL4RA, GAS6, H2-AB1	107	523	20010	2.50299	1	0.382926	0.357723
	GOTERM_BP_FAT	GO:0032504~multicellular organism reproduction	12	10.8108	0.0596378	ZMYND15, PTGIS, AXL, MYC, PTAFR, TMEM119, SLIT3, PGR, RSPO1, FOLR2, AGT, WNT4	107	1225	20010	1.83193	1	0.382926	0.357723
	GOTERM_BP_FAT	GO:0010001~glial cell differentiation	5	4.5045	0.059821	CSF1R, C1QA, EGR2, LRP1, AGT	107	277	20010	3.37562	1	0.383436	0.358199
	GOTERM_BP_FAT	GO:0050729~positive regulation of inflammatory response	4	3.6036	0.0599693	ZBP1, H2-T23, CTSS, IL17RA	107	168	20010	4.4526	1	0.383721	0.358465
	GOTERM_BP_FAT	GO:0009620~response to fungus	3	2.7027	0.0600959	ZBP1, SPON2, IL17RA	107	75	20010	7.48037	1	0.383865	0.3586
	GOTERM_BP_FAT	GO:0072376~protein activation cascade	5	4.5045	0.0604572	C1QB, C4B, C1QA, CFP, C1QC	107	278	20010	3.36348	1	0.385506	0.360133
	GOTERM_BP_FAT	GO:0060675~ureteric bud morphogenesis	3	2.7027	0.0615126	MYC, AGT, WNT4	107	76	20010	7.38195	1	0.38914	0.363528
	GOTERM_BP_FAT	GO:0072073~kidney epithelium development	4	3.6036	0.0616899	MYC, OSR1, AGT, WNT4	107	170	20010	4.40022	1	0.38914	0.363528
	GOTERM_BP_FAT	GO:0070663~regulation of leukocyte proliferation	5	4.5045	0.0617405	H2-T23, CSF1R, CD74, PLA2G2D, H2-AB1	107	280	20010	3.33945	1	0.38914	0.363528
	GOTERM_BP_FAT	GO:0002579~positive regulation of antigen processing and presentation	2	1.8018	0.0617649	CD74, H2-AB1	107	12	20010	31.1682	1	0.38914	0.363528
	GOTERM_BP_FAT	GO:0032825~positive regulation of natural killer cell differentiation	2	1.8018	0.0617649	AXL, GAS6	107	12	20010	31.1682	1	0.38914	0.363528
	GOTERM_BP_FAT	GO:1903028~positive regulation of opsonization	2	1.8018	0.0617649	C4B, CFP	107	12	20010	31.1682	1	0.38914	0.363528
	GOTERM_BP_FAT	GO:1904238~pericyte cell differentiation	2	1.8018	0.0617649	OSR1, WNT4	107	12	20010	31.1682	1	0.38914	0.363528
	GOTERM_BP_FAT	GO:0008544~epidermis development	6	5.40541	0.062127	MYCL, ERRFI1, SLC9A3R1, ZFP36, MAFB, KRT8	107	401	20010	2.79814	1	0.390754	0.365036
	GOTERM_BP_FAT	GO:0072659~protein localization to plasma membrane	5	4.5045	0.0623876	SLC9A3R1, LRP1, MYO5B, GAS6, EZR	107	281	20010	3.32757	1	0.391061	0.365322
	GOTERM_BP_FAT	GO:0031668~cellular response to extracellular stimulus	5	4.5045	0.0623876	AXL, SIK1, FOS, GAS6, WNT4	107	281	20010	3.32757	1	0.391061	0.365322
	GOTERM_BP_FAT	GO:0002763~positive regulation of myeloid leukocyte differentiation	3	2.7027	0.0629408	CSF1R, CD74, FOS	107	77	20010	7.28608	1	0.39386	0.367937
	GOTERM_BP_FAT	GO:0043436~oxoacid metabolic process	11	9.90991	0.0632481	CD74, AHCY, PTGIS, AKR1CL, IRS1, P4HA3, SPOCK2, MYC, PLOD2, HS3ST6, AGT	107	1090	20010	1.88725	1	0.395113	0.369108
	GOTERM_BP_FAT	GO:0006865~amino acid transport	4	3.6036	0.0634335	SLC9A3R1, MYC, OSR1, AGT	107	172	20010	4.34905	1	0.395602	0.369565
	GOTERM_BP_FAT	GO:0060541~respiratory system development	5	4.5045	0.0636926	ERRFI1, ANO1, CTSH, PGR, RXFP1	107	283	20010	3.30405	1	0.396059	0.369991
	GOTERM_BP_FAT	GO:0060562~epithelial tube morphogenesis	6	5.40541	0.0637213	MYC, OSR1, CTSH, PGR, AGT, WNT4	107	404	20010	2.77737	1	0.396059	0.369991
	GOTERM_BP_FAT	GO:1901214~regulation of neuron death	6	5.40541	0.0653386	C1QA, LRP1, AXL, FOS, PTPN5, AGT	107	407	20010	2.75689	1	0.405429	0.378744
	GOTERM_BP_FAT	GO:0043405~regulation of MAP kinase activity	5	4.5045	0.0656769	CD74, IGFBP6, THBS1, PTPN5, AGT	107	286	20010	3.26939	1	0.406844	0.380067
	GOTERM_BP_FAT	GO:0072006~nephron development	4	3.6036	0.0660915	MYC, OSR1, AGT, WNT4	107	175	20010	4.2745	1	0.408727	0.381825
	GOTERM_BP_FAT	GO:2000668~regulation of dendritic cell apoptotic process	2	1.8018	0.0667381	AXL, GAS6	107	13	20010	28.7707	1	0.409297	0.382358
	GOTERM_BP_FAT	GO:0097048~dendritic cell apoptotic process	2	1.8018	0.0667381	AXL, GAS6	107	13	20010	28.7707	1	0.409297	0.382358
	GOTERM_BP_FAT	GO:1903960~negative regulation of anion transmembrane transport	2	1.8018	0.0667381	OSR1, THBS1	107	13	20010	28.7707	1	0.409297	0.382358
	GOTERM_BP_FAT	GO:0030033~microvillus assembly	2	1.8018	0.0667381	SLC9A3R1, EZR	107	13	20010	28.7707	1	0.409297	0.382358
	GOTERM_BP_FAT	GO:0001542~ovulation from ovarian follicle	2	1.8018	0.0667381	PGR, AGT	107	13	20010	28.7707	1	0.409297	0.382358
	GOTERM_BP_FAT	GO:0046635~positive regulation of alpha-beta T cell activation	3	2.7027	0.067292	H2-T23, IL4RA, H2-AB1	107	80	20010	7.01285	1	0.410648	0.38362
	GOTERM_BP_FAT	GO:0045669~positive regulation of osteoblast differentiation	3	2.7027	0.067292	CEBPD, TMEM119, WNT4	107	80	20010	7.01285	1	0.410648	0.38362
	GOTERM_BP_FAT	GO:2000107~negative regulation of leukocyte apoptotic process	3	2.7027	0.067292	CD74, AXL, GAS6	107	80	20010	7.01285	1	0.410648	0.38362
	GOTERM_BP_FAT	GO:0030856~regulation of epithelial cell differentiation	4	3.6036	0.0688002	MYCL, ERRFI1, ZFP36, OSR1	107	178	20010	4.20246	1	0.419159	0.391571
	GOTERM_BP_FAT	GO:0044255~cellular lipid metabolic process	11	9.90991	0.0689861	SOCS2, CSF1R, CD74, PLA2G2D, PTGIS, AKR1CL, LRP1, PLPPR3, IRS1, SIK1, AGT	107	1108	20010	1.85659	1	0.419599	0.391982
	GOTERM_BP_FAT	GO:0006082~organic acid metabolic process	11	9.90991	0.0693144	CD74, AHCY, PTGIS, AKR1CL, IRS1, P4HA3, SPOCK2, MYC, PLOD2, HS3ST6, AGT	107	1109	20010	1.85492	1	0.420903	0.3932
	GOTERM_BP_FAT	GO:0044703~multi-organism reproductive process	13	11.7117	0.0695272	ZMYND15, PTGIS, PTAFR, FOS, RXFP1, AGT, AXL, MYC, TMEM119, PGR, RSPO1, FOLR2, WNT4	107	1410	20010	1.7242	1	0.421501	0.393759
	GOTERM_BP_FAT	GO:0051607~defense response to virus	5	4.5045	0.069742	ZBP1, SPON2, OAS3, HTRA1, ISG15	107	292	20010	3.20221	1	0.422111	0.394328
	GOTERM_BP_FAT	GO:0045664~regulation of neuron differentiation	9	8.10811	0.0699702	SOCS2, MYCL, LRP1, MYO5B, MMD2, PTPN5, NBL1, AGT, FBXO31	107	821	20010	2.05004	1	0.422799	0.394971
	GOTERM_BP_FAT	GO:0019216~regulation of lipid metabolic process	6	5.40541	0.0703285	CD74, IRS1, SIK1, ATP1A1, AGT, WNT4	107	416	20010	2.69725	1	0.424269	0.396345
	GOTERM_BP_FAT	GO:0009743~response to carbohydrate	5	4.5045	0.0711254	ANO1, LRP1, MYC, GAS6, THBS1	107	294	20010	3.18043	1	0.425501	0.397495
	GOTERM_BP_FAT	GO:0001944~vasculature development	9	8.10811	0.0711406	ERRFI1, EGR2, PTGIS, LRP1, OSR1, CTSH, THBS1, AGT, WNT4	107	824	20010	2.04258	1	0.425501	0.397495
	GOTERM_BP_FAT	GO:0072358~cardiovascular system development	9	8.10811	0.0711406	ERRFI1, EGR2, PTGIS, LRP1, OSR1, CTSH, THBS1, AGT, WNT4	107	824	20010	2.04258	1	0.425501	0.397495
	GOTERM_BP_FAT	GO:0048638~regulation of developmental growth	6	5.40541	0.0714654	SOCS2, LRP1, WWC1, MYO5B, EZR, AGT	107	418	20010	2.68434	1	0.425501	0.397495
	GOTERM_BP_FAT	GO:0002244~hematopoietic progenitor cell differentiation	4	3.6036	0.0715588	CSF1R, ZFP36, CEBPD, STON2	107	181	20010	4.1328	1	0.425501	0.397495
	GOTERM_BP_FAT	GO:0032940~secretion by cell	10	9.00901	0.0715917	ANO1, CCL8, LRP1, AXL, IRS1, MYO5B, PTAFR, IL4RA, EZR, AGT	107	969	20010	1.92992	1	0.425501	0.397495
	GOTERM_BP_FAT	GO:1903027~regulation of opsonization	2	1.8018	0.0716851	C4B, CFP	107	14	20010	26.7156	1	0.425501	0.397495
	GOTERM_BP_FAT	GO:0010642~negative regulation of platelet-derived growth factor receptor signaling pathway	2	1.8018	0.0716851	SLC9A3R1, LRP1	107	14	20010	26.7156	1	0.425501	0.397495
	GOTERM_BP_FAT	GO:1903961~positive regulation of anion transmembrane transport	2	1.8018	0.0716851	PTAFR, AGT	107	14	20010	26.7156	1	0.425501	0.397495
	GOTERM_BP_FAT	GO:0007567~parturition	2	1.8018	0.0716851	PTAFR, RXFP1	107	14	20010	26.7156	1	0.425501	0.397495
	GOTERM_BP_FAT	GO:0031098~stress-activated protein kinase signaling cascade	5	4.5045	0.0718224	ERRFI1, ZFP36, IGFBP6, EZR, AGT	107	295	20010	3.16965	1	0.425571	0.397561
	GOTERM_BP_FAT	GO:0097435~supramolecular fiber organization	9	8.10811	0.0719275	KRT19, CSRP2, MYO5B, KRT8, P3H4, AEBP1, FLNC, EZR, WNT4	107	826	20010	2.03763	1	0.425571	0.397561
	GOTERM_BP_FAT	GO:0014074~response to purine-containing compound	4	3.6036	0.0724893	IRS1, PTAFR, FOS, EZR	107	182	20010	4.1101	1	0.428209	0.400025
	GOTERM_BP_FAT	GO:0044283~small molecule biosynthetic process	7	6.30631	0.0726577	CD74, PTGIS, PTAFR, PLOD2, SIK1, AGT, WNT4	107	551	20010	2.3758	1	0.428518	0.400314
	GOTERM_BP_FAT	GO:0032868~response to insulin	5	4.5045	0.0732269	ERRFI1, EGR2, IRS1, MYC, AGT	107	297	20010	3.14831	1	0.431186	0.402806
	GOTERM_BP_FAT	GO:0048568~embryonic organ development	7	6.30631	0.0746555	SLC9A3R1, KRT19, MAFB, MYC, OSR1, KRT8, RPL38	107	555	20010	2.35868	1	0.437409	0.40862
	GOTERM_BP_FAT	GO:0002437~inflammatory response to antigenic stimulus	3	2.7027	0.0747576	H2-T23, PLA2G2D, AHCY	107	85	20010	6.60033	1	0.437409	0.40862
	GOTERM_BP_FAT	GO:0070373~negative regulation of ERK1 and ERK2 cascade	3	2.7027	0.0747576	ERRFI1, SLC9A3R1, EZR	107	85	20010	6.60033	1	0.437409	0.40862
	GOTERM_BP_FAT	GO:0070228~regulation of lymphocyte apoptotic process	3	2.7027	0.0747576	CD74, MYC, SIGLEC1	107	85	20010	6.60033	1	0.437409	0.40862
	GOTERM_BP_FAT	GO:0098657~import into cell	4	3.6036	0.0753134	KCNK5, SLC9A3R1, ATP1A1, AGT	107	185	20010	4.04345	1	0.439964	0.411006
	GOTERM_BP_FAT	GO:0060191~regulation of lipase activity	3	2.7027	0.0762814	LRP1, PTAFR, AGT	107	86	20010	6.52358	1	0.442613	0.413481
	GOTERM_BP_FAT	GO:0045682~regulation of epidermis development	3	2.7027	0.0762814	MYCL, ERRFI1, ZFP36	107	86	20010	6.52358	1	0.442613	0.413481
	GOTERM_BP_FAT	GO:2000343~positive regulation of chemokine (C-X-C motif) ligand 2 production	2	1.8018	0.0766062	CD74, LRP1	107	15	20010	24.9346	1	0.442613	0.413481
	GOTERM_BP_FAT	GO:2000650~negative regulation of sodium ion transmembrane transporter activity	2	1.8018	0.0766062	SLC9A3R1, OSR1	107	15	20010	24.9346	1	0.442613	0.413481
	GOTERM_BP_FAT	GO:0042270~protection from natural killer cell mediated cytotoxicity	2	1.8018	0.0766062	H2-T23, TAP1	107	15	20010	24.9346	1	0.442613	0.413481
	GOTERM_BP_FAT	GO:0002396~MHC protein complex assembly	2	1.8018	0.0766062	H2-EB1, H2-AB1	107	15	20010	24.9346	1	0.442613	0.413481
	GOTERM_BP_FAT	GO:0002501~peptide antigen assembly with MHC protein complex	2	1.8018	0.0766062	H2-EB1, H2-AB1	107	15	20010	24.9346	1	0.442613	0.413481
	GOTERM_BP_FAT	GO:0006811~ion transport	15	13.5135	0.0770127	KCNK5, PLA2G2D, OSR1, PTAFR, ATP1A1, THBS1, CTSS, AGT, ANO1, SLC9A3R1, CCL8, MYC, SIK1, FOLR2, GAS6	107	1746	20010	1.60661	1	0.444267	0.415026
	GOTERM_BP_FAT	GO:0043406~positive regulation of MAP kinase activity	4	3.6036	0.078186	CD74, IGFBP6, THBS1, AGT	107	188	20010	3.97892	1	0.44963	0.420036
	GOTERM_BP_FAT	GO:0051896~regulation of protein kinase B signaling	4	3.6036	0.078186	SLC9A3R1, AXL, GAS6, THBS1	107	188	20010	3.97892	1	0.44963	0.420036
	GOTERM_BP_FAT	GO:0048589~developmental growth	9	8.10811	0.0788327	SOCS2, CSF1R, LRP1, WWC1, MYO5B, SLIT3, EZR, THBS1, AGT	107	843	20010	1.99654	1	0.452644	0.422852
	GOTERM_BP_FAT	GO:0071322~cellular response to carbohydrate stimulus	4	3.6036	0.0791541	ANO1, LRP1, MYC, GAS6	107	189	20010	3.95787	1	0.452846	0.423041
	GOTERM_BP_FAT	GO:0048708~astrocyte differentiation	3	2.7027	0.0793585	C1QA, LRP1, AGT	107	88	20010	6.37532	1	0.452846	0.423041
	GOTERM_BP_FAT	GO:0045670~regulation of osteoclast differentiation	3	2.7027	0.0793585	CSF1R, MAFB, FOS	107	88	20010	6.37532	1	0.452846	0.423041
	GOTERM_BP_FAT	GO:0002720~positive regulation of cytokine production involved in immune response	3	2.7027	0.0793585	SPON2, H2-T23, CD74	107	88	20010	6.37532	1	0.452846	0.423041
	GOTERM_BP_FAT	GO:0000902~cell morphogenesis	11	9.90991	0.0796326	CSF1R, SLC9A3R1, EGR2, LRP1, AXL, MYO5B, KRT8, SLIT3, EZR, NBL1, FBXO31	107	1139	20010	1.80606	1	0.453709	0.423847
	GOTERM_BP_FAT	GO:0000904~cell morphogenesis involved in differentiation	9	8.10811	0.0800915	CSF1R, SLC9A3R1, EGR2, LRP1, AXL, MYO5B, KRT8, SLIT3, FBXO31	107	846	20010	1.98946	1	0.455621	0.425633
	GOTERM_BP_FAT	GO:0051960~regulation of nervous system development	11	9.90991	0.0807146	SOCS2, MYCL, EGR2, LRP1, MYC, MYO5B, MMD2, PTPN5, NBL1, AGT, FBXO31	107	1142	20010	1.80132	1	0.458459	0.428284
	GOTERM_BP_FAT	GO:0006704~glucocorticoid biosynthetic process	2	1.8018	0.0815014	ATP1A1, WNT4	107	16	20010	23.3762	1	0.461508	0.431132
	GOTERM_BP_FAT	GO:0032736~positive regulation of interleukin-13 production	2	1.8018	0.0815014	H2-T23, IL17RA	107	16	20010	23.3762	1	0.461508	0.431132
	GOTERM_BP_FAT	GO:0044802~single-organism membrane organization	9	8.10811	0.0817887	SLC9A3R1, MAFB, LRP1, MYC, MYO5B, FOLR2, GAS6, EZR, MTSS2	107	850	20010	1.9801	1	0.462425	0.43199
	GOTERM_BP_FAT	GO:0051249~regulation of lymphocyte activation	8	7.20721	0.0820972	H2-T23, CD74, H2-EB1, PLA2G2D, AXL, IL4RA, GAS6, H2-AB1	107	708	20010	2.1131	1	0.46346	0.432956
	GOTERM_BP_FAT	GO:0040014~regulation of multicellular organism growth	3	2.7027	0.082474	SOCS2, EZR, AGT	107	90	20010	6.23364	1	0.463461	0.432957
	GOTERM_BP_FAT	GO:0031100~animal organ regeneration	3	2.7027	0.082474	AXL, MYC, GAS6	107	90	20010	6.23364	1	0.463461	0.432957
	GOTERM_BP_FAT	GO:0035914~skeletal muscle cell differentiation	3	2.7027	0.082474	EGR2, MYC, FOS	107	90	20010	6.23364	1	0.463461	0.432957
	GOTERM_BP_FAT	GO:0015718~monocarboxylic acid transport	4	3.6036	0.0830791	SLC9A3R1, PLA2G2D, MYC, THBS1	107	193	20010	3.87584	1	0.466152	0.435471
	GOTERM_BP_FAT	GO:0001503~ossification	6	5.40541	0.0840122	CEBPD, OSR1, TMEM119, ISG15, RPL38, WNT4	107	439	20010	2.55594	1	0.46959	0.438682
	GOTERM_BP_FAT	GO:0032890~regulation of organic acid transport	3	2.7027	0.0840457	OSR1, THBS1, AGT	107	91	20010	6.16514	1	0.46959	0.438682
	GOTERM_BP_FAT	GO:0001890~placenta development	4	3.6036	0.0840733	KRT19, PTGIS, KRT8, HTRA1	107	194	20010	3.85586	1	0.46959	0.438682
	GOTERM_BP_FAT	GO:0007179~transforming growth factor beta receptor signaling pathway	4	3.6036	0.0860771	LRP1, HTRA1, FOS, THBS1	107	196	20010	3.81652	1	0.477316	0.4459
	GOTERM_BP_FAT	GO:1990138~neuron projection extension	4	3.6036	0.0860771	CSF1R, LRP1, MYO5B, SLIT3	107	196	20010	3.81652	1	0.477316	0.4459
	GOTERM_BP_FAT	GO:0060081~membrane hyperpolarization	2	1.8018	0.0863709	ATP1A1, AGT	107	17	20010	22.0011	1	0.477316	0.4459
	GOTERM_BP_FAT	GO:0045056~transcytosis	2	1.8018	0.0863709	LRP1, PTAFR	107	17	20010	22.0011	1	0.477316	0.4459
	GOTERM_BP_FAT	GO:1902306~negative regulation of sodium ion transmembrane transport	2	1.8018	0.0863709	SLC9A3R1, OSR1	107	17	20010	22.0011	1	0.477316	0.4459
	GOTERM_BP_FAT	GO:0045217~cell-cell junction maintenance	2	1.8018	0.0863709	CSF1R, PRTN3	107	17	20010	22.0011	1	0.477316	0.4459
	GOTERM_BP_FAT	GO:1903530~regulation of secretion by cell	8	7.20721	0.0864108	ANO1, LRP1, IRS1, MYO5B, PTAFR, IL4RA, EZR, AGT	107	717	20010	2.08658	1	0.477316	0.4459
	GOTERM_BP_FAT	GO:0018108~peptidyl-tyrosine phosphorylation	5	4.5045	0.086491	CSF1R, CD74, ERRFI1, GAS6, AGT	107	315	20010	2.9684	1	0.477316	0.4459
	GOTERM_BP_FAT	GO:0048659~smooth muscle cell proliferation	4	3.6036	0.0870867	MYC, PTAFR, THBS1, AGT	107	197	20010	3.79714	1	0.479586	0.44802
	GOTERM_BP_FAT	GO:0071900~regulation of protein serine/threonine kinase activity	6	5.40541	0.0871619	CSF1R, CD74, IGFBP6, THBS1, PTPN5, AGT	107	444	20010	2.52715	1	0.479586	0.44802
	GOTERM_BP_FAT	GO:0048660~regulation of smooth muscle cell proliferation	4	3.6036	0.0881013	MYC, PTAFR, THBS1, AGT	107	198	20010	3.77797	1	0.482596	0.450833
	GOTERM_BP_FAT	GO:0050731~positive regulation of peptidyl-tyrosine phosphorylation	4	3.6036	0.0881013	CSF1R, CD74, GAS6, AGT	107	198	20010	3.77797	1	0.482596	0.450833
	GOTERM_BP_FAT	GO:0002262~myeloid cell homeostasis	4	3.6036	0.0881013	ZFP36, MAFB, AXL, ISG15	107	198	20010	3.77797	1	0.482596	0.450833
	GOTERM_BP_FAT	GO:0071375~cellular response to peptide hormone stimulus	5	4.5045	0.0888088	SOCS2, ERRFI1, IRS1, MYC, AGT	107	318	20010	2.9404	1	0.484414	0.452531
	GOTERM_BP_FAT	GO:0018212~peptidyl-tyrosine modification	5	4.5045	0.0888088	CSF1R, CD74, ERRFI1, GAS6, AGT	107	318	20010	2.9404	1	0.484414	0.452531
	GOTERM_BP_FAT	GO:0045936~negative regulation of phosphate metabolic process	7	6.30631	0.0889579	ERRFI1, SLC9A3R1, LRP1, PTPN13, EZR, PTPN5, AGT	107	582	20010	2.24925	1	0.484414	0.452531
	GOTERM_BP_FAT	GO:0010563~negative regulation of phosphorus metabolic process	7	6.30631	0.0889579	ERRFI1, SLC9A3R1, LRP1, PTPN13, EZR, PTPN5, AGT	107	582	20010	2.24925	1	0.484414	0.452531
	GOTERM_BP_FAT	GO:0045834~positive regulation of lipid metabolic process	4	3.6036	0.0901455	CD74, IRS1, AGT, WNT4	107	200	20010	3.74019	1	0.490158	0.457897
	GOTERM_BP_FAT	GO:0072087~renal vesicle development	2	1.8018	0.0912148	OSR1, WNT4	107	18	20010	20.7788	1	0.492347	0.459941
	GOTERM_BP_FAT	GO:0019755~one-carbon compound transport	2	1.8018	0.0912148	AQP5, CAR12	107	18	20010	20.7788	1	0.492347	0.459941
	GOTERM_BP_FAT	GO:0002830~positive regulation of type 2 immune response	2	1.8018	0.0912148	CD74, IL4RA	107	18	20010	20.7788	1	0.492347	0.459941
	GOTERM_BP_FAT	GO:0002468~dendritic cell antigen processing and presentation	2	1.8018	0.0912148	CD74, THBS1	107	18	20010	20.7788	1	0.492347	0.459941
	GOTERM_BP_FAT	GO:0045655~regulation of monocyte differentiation	2	1.8018	0.0912148	CD74, MYC	107	18	20010	20.7788	1	0.492347	0.459941
	GOTERM_BP_FAT	GO:0035239~tube morphogenesis	6	5.40541	0.091675	MYC, OSR1, CTSH, PGR, AGT, WNT4	107	451	20010	2.48793	1	0.493778	0.461278
	GOTERM_BP_FAT	GO:0010629~negative regulation of gene expression	17	15.3153	0.0917474	ZMYND15, CEBPD, LRP1, WWC1, OSR1, AEBP1, PTPN13, THBS1, AGT, ZFP36, MYC, PGR, SLIT3, SIK1, EZR, GAS6, WNT4	107	2117	20010	1.50173	1	0.493778	0.461278
	GOTERM_BP_FAT	GO:0070997~neuron death	6	5.40541	0.0929864	C1QA, LRP1, AXL, FOS, PTPN5, AGT	107	453	20010	2.47694	1	0.499717	0.466827
	GOTERM_BP_FAT	GO:0060284~regulation of cell development	11	9.90991	0.0932227	SOCS2, MYCL, EGR2, LRP1, MYC, MYO5B, MMD2, PTPN5, NBL1, AGT, FBXO31	107	1175	20010	1.75073	1	0.500259	0.467333
	GOTERM_BP_FAT	GO:0030217~T cell differentiation	5	4.5045	0.0935342	CD74, PLA2G2D, MAFB, IL4RA, WNT4	107	324	20010	2.88595	1	0.501073	0.468093
	GOTERM_BP_FAT	GO:0016055~Wnt signaling pathway	6	5.40541	0.0936458	SLC9A3R1, LRP1, MYC, RSPO1, CPZ, WNT4	107	454	20010	2.47149	1	0.501073	0.468093
	GOTERM_BP_FAT	GO:0198738~cell-cell signaling by wnt	6	5.40541	0.0949718	SLC9A3R1, LRP1, MYC, RSPO1, CPZ, WNT4	107	456	20010	2.46065	1	0.507232	0.473847
	GOTERM_BP_FAT	GO:0042116~macrophage activation	3	2.7027	0.095297	C1QA, IL4RA, THBS1	107	98	20010	5.72478	1	0.507232	0.473847
	GOTERM_BP_FAT	GO:0043902~positive regulation of multi-organism process	4	3.6036	0.0953425	CSF1R, CD74, AXL, PTAFR	107	205	20010	3.64896	1	0.507232	0.473847
	GOTERM_BP_FAT	GO:0009415~response to water	2	1.8018	0.0960333	MYC, KRT8	107	19	20010	19.6852	1	0.507232	0.473847
	GOTERM_BP_FAT	GO:0032823~regulation of natural killer cell differentiation	2	1.8018	0.0960333	AXL, GAS6	107	19	20010	19.6852	1	0.507232	0.473847
	GOTERM_BP_FAT	GO:1901741~positive regulation of myoblast fusion	2	1.8018	0.0960333	CCL8, IL4RA	107	19	20010	19.6852	1	0.507232	0.473847
	GOTERM_BP_FAT	GO:0015669~gas transport	2	1.8018	0.0960333	AQP5, CAR12	107	19	20010	19.6852	1	0.507232	0.473847
	GOTERM_BP_FAT	GO:0097067~cellular response to thyroid hormone stimulus	2	1.8018	0.0960333	CTSH, CTSS	107	19	20010	19.6852	1	0.507232	0.473847
	GOTERM_BP_FAT	GO:0040037~negative regulation of fibroblast growth factor receptor signaling pathway	2	1.8018	0.0960333	THBS1, WNT4	107	19	20010	19.6852	1	0.507232	0.473847
	GOTERM_BP_FAT	GO:0071383~cellular response to steroid hormone stimulus	4	3.6036	0.0974553	ERRFI1, ZFP36, PGR, ATP1A1	107	207	20010	3.61371	1	0.514007	0.480176
	GOTERM_BP_FAT	GO:0045927~positive regulation of growth	5	4.5045	0.0983776	LRP1, MYO5B, EZR, AGT, CXCL16	107	330	20010	2.83347	1	0.518131	0.484029
	GOTERM_BP_FAT	GO:0002793~positive regulation of peptide secretion	4	3.6036	0.0995872	ANO1, LRP1, IRS1, EZR	107	209	20010	3.57913	1	0.52301	0.488586
	GOTERM_BP_FAT	GO:0034767~positive regulation of ion transmembrane transport	4	3.6036	0.0995872	SLC9A3R1, PTAFR, CTSS, AGT	107	209	20010	3.57913	1	0.52301	0.488586
	GOTERM_CC_FAT	GO:0005576~extracellular region	39	35.1351	4.71918e-06	C1QB, H2-T23, SNED1, SPON2, C1QA, APOL9B, APOL9A, HTRA1, IL4RA, AEBP1, CFP, CPZ, THBS1, CTSS, CXCL16, C4B, SLC9A3R1, CCL8, CYTH4, SPOCK2, CCN5, CTSH, SLIT3, RSPO1, IGFBP6, WNT4, CD74, PLA2G2D, PTGIS, GPX3, ISG15, AGT, IIGP1, AXL, PRTN3, SIGLEC1, GAS6, NBL1, C1QC	102	3086	16683	2.06701	0.00163151	0.00163284	0.0016234
	GOTERM_CC_FAT	GO:0044421~extracellular region part	32	28.8288	4.33029e-05	C1QB, H2-T23, SNED1, SPON2, C1QA, APOL9A, IL4RA, AEBP1, CFP, CPZ, THBS1, CTSS, CXCL16, C4B, CCL8, CYTH4, CCN5, CTSH, SLIT3, RSPO1, IGFBP6, WNT4, CD74, PTGIS, GPX3, AGT, IIGP1, AXL, PRTN3, GAS6, NBL1, C1QC	102	2490	16683	2.10196	0.0148714	0.00675587	0.00671682
	GOTERM_CC_FAT	GO:0005615~extracellular space	29	26.1261	5.85769e-05	C1QB, H2-T23, SPON2, C1QA, APOL9A, IL4RA, AEBP1, CFP, CPZ, THBS1, CTSS, CXCL16, C4B, CCL8, CCN5, CTSH, SLIT3, RSPO1, IGFBP6, WNT4, CD74, PTGIS, GPX3, AGT, AXL, PRTN3, GAS6, NBL1, C1QC	102	2163	16683	2.19288	0.0200642	0.00675587	0.00671682
	GOTERM_CC_FAT	GO:0005602~complement component C1 complex	3	2.7027	0.000747167	C1QB, C1QA, C1QC	102	7	16683	70.0966	0.227881	0.0646299	0.0642563
	GOTERM_CC_FAT	GO:0042611~MHC protein complex	4	3.6036	0.00208311	H2-T23, CD74, H2-EB1, H2-AB1	102	42	16683	15.577	0.513982	0.144151	0.143318
	GOTERM_CC_FAT	GO:0042613~MHC class II protein complex	3	2.7027	0.00412047	CD74, H2-EB1, H2-AB1	102	16	16683	30.6673	0.760363	0.226704	0.225393
	GOTERM_CC_FAT	GO:0098552~side of membrane	14	12.6126	0.00458649	H2-T23, ERRFI1, CD74, H2-EB1, LRP1, CD209F, IL4RA, THBS1, MTSS2, ANO1, RPS29, FOLR2, EZR, H2-AB1	102	946	16683	2.42053	0.796192	0.226704	0.225393
	GOTERM_CC_FAT	GO:0044853~plasma membrane raft	5	4.5045	0.0116668	PTGIS, IRS1, PRTN3, ATP1A1, EZR	102	145	16683	5.63996	0.982759	0.504588	0.501671
	GOTERM_CC_FAT	GO:0042383~sarcolemma	5	4.5045	0.0234036	KRT19, KRT8, ATP1A1, FLNC, EZR	102	179	16683	4.56868	0.999724	0.892339	0.887181
	GOTERM_CC_FAT	GO:0009986~cell surface	15	13.5135	0.0304229	H2-T23, CSF1R, CD74, H2-EB1, LRP1, CD209F, IL4RA, THBS1, CTSS, ANO1, AXL, CCN5, FOLR2, H2-AB1, WNT4	102	1337	16683	1.83499	0.999977	0.892339	0.887181
	GOTERM_CC_FAT	GO:0009897~external side of plasma membrane	10	9.00901	0.0320358	H2-T23, CD74, ANO1, H2-EB1, LRP1, CD209F, IL4RA, FOLR2, THBS1, H2-AB1	102	727	16683	2.24978	0.999987	0.892339	0.887181
	GOTERM_CC_FAT	GO:0098590~plasma membrane region	15	13.5135	0.0339173	PTGIS, LRP1, IRS1, WWC1, KRT8, AQP5, ATP1A1, MTSS2, ANO1, SLC9A3R1, PARD6B, KRT19, PRTN3, EZR, PTPN5	102	1357	16683	1.80795	0.999993	0.892339	0.887181
	GOTERM_CC_FAT	GO:0022626~cytosolic ribosome	4	3.6036	0.0356073	RPS29, RPLP1, ISG15, RPL38	102	119	16683	5.49778	0.999996	0.892339	0.887181
	GOTERM_CC_FAT	GO:0098589~membrane region	8	7.20721	0.0381121	SLC9A3R1, ANO1, PTGIS, LRP1, IRS1, PRTN3, ATP1A1, EZR	102	519	16683	2.52114	0.999999	0.892339	0.887181
	GOTERM_CC_FAT	GO:0045335~phagocytic vesicle	4	3.6036	0.0386852	H2-T23, TAP1, CTSS, MPEG1	102	123	16683	5.31899	0.999999	0.892339	0.887181
	GOTERM_CC_FAT	GO:0045177~apical part of cell	8	7.20721	0.044433	SLC9A3R1, ANO1, PARD6B, LRP1, MYO5B, AQP5, ATP1A1, EZR	102	537	16683	2.43663	1	0.960832	0.955278
	GOTERM_CC_FAT	GO:0045121~membrane raft	7	6.30631	0.0495344	SLC9A3R1, ANO1, PTGIS, IRS1, PRTN3, ATP1A1, EZR	102	437	16683	2.61994	1	0.960832	0.955278
	GOTERM_CC_FAT	GO:0098857~membrane microdomain	7	6.30631	0.0499855	SLC9A3R1, ANO1, PTGIS, IRS1, PRTN3, ATP1A1, EZR	102	438	16683	2.61395	1	0.960832	0.955278
	GOTERM_CC_FAT	GO:0030018~Z disc	4	3.6036	0.0588888	KRT19, CSRP2, KRT8, FLNC	102	146	16683	4.48106	1	1	0.997101
	GOTERM_CC_FAT	GO:0005783~endoplasmic reticulum	18	16.2162	0.0643019	H2-T23, CD74, PTGIS, GM12248, TAP1, PLOD2, P3H4, FOS, AQP5, ATP1A1, THBS1, IIGP1, RPS29, P4HA3, TMEM119, PGR, PTPN5, WNT4	102	1902	16683	1.54788	1	1	0.997101
	GOTERM_CC_FAT	GO:0033643~host cell part	2	1.8018	0.0646339	AXL, IIGP1	102	11	16683	29.738	1	1	0.997101
	GOTERM_CC_FAT	GO:0031012~extracellular matrix	6	5.40541	0.0688641	SPON2, SNED1, CCN5, CPZ, THBS1, WNT4	102	362	16683	2.71092	1	1	0.997101
	GOTERM_CC_FAT	GO:0031674~I band	4	3.6036	0.0731771	KRT19, CSRP2, KRT8, FLNC	102	160	16683	4.08897	1	1	0.997101
	GOTERM_CC_FAT	GO:0018995~host	2	1.8018	0.0759329	AXL, IIGP1	102	13	16683	25.1629	1	1	0.997101
	GOTERM_CC_FAT	GO:0043657~host cell	2	1.8018	0.0759329	AXL, IIGP1	102	13	16683	25.1629	1	1	0.997101
	GOTERM_CC_FAT	GO:0044217~other organism part	2	1.8018	0.0815316	AXL, IIGP1	102	14	16683	23.3655	1	1	0.997101
	GOTERM_CC_FAT	GO:0044215~other organism	2	1.8018	0.0815316	AXL, IIGP1	102	14	16683	23.3655	1	1	0.997101
	GOTERM_CC_FAT	GO:0044216~other organism cell	2	1.8018	0.0815316	AXL, IIGP1	102	14	16683	23.3655	1	1	0.997101
	GOTERM_CC_FAT	GO:0005581~collagen trimer	3	2.7027	0.0956878	C1QB, C1QA, C1QC	102	86	16683	5.70554	1	1	0.997101
	GOTERM_MF_FAT	GO:0005102~receptor binding	28	25.2252	5.96276e-06	H2-T23, SNED1, SPON2, LRP1, IRS1, THBS1, CXCL16, SOCS2, SLC9A3R1, CCL8, CCN5, SLIT3, RSPO1, WNT4, CD74, H2-EB1, TAP1, ISG15, AGT, IL17RA, ANO1, MYO5B, PRTN3, PGR, PIK3AP1, GAS6, NBL1, PTPN5	101	1973	18079	2.54029	0.00310179	0.00157822	0.00154793
	GOTERM_MF_FAT	GO:0044877~macromolecular complex binding	25	22.5225	6.05843e-06	H2-T23, LRP1, IRS1, RPLP1, AEBP1, THBS1, CTSS, SLC9A3R1, ZFP36, MYC, CCN5, CTSH, FLNC, CD74, H2-EB1, KRT8, TAP1, P3H4, ISG15, FOS, KRT19, MAFB, MYO5B, EZR, H2-AB1	101	1621	18079	2.76064	0.00315147	0.00157822	0.00154793
	GOTERM_MF_FAT	GO:0043548~phosphatidylinositol 3-kinase binding	5	4.5045	8.39325e-05	AXL, IRS1, ATP1A1, PTPN13, PIK3AP1	101	42	18079	21.3095	0.0427883	0.0145763	0.0142965
	GOTERM_MF_FAT	GO:0032403~protein complex binding	14	12.6126	0.00040245	H2-T23, CD74, H2-EB1, IRS1, P3H4, ISG15, AEBP1, THBS1, CTSS, MYO5B, CCN5, FLNC, EZR, H2-AB1	101	789	18079	3.17617	0.189188	0.0524191	0.051413
	GOTERM_MF_FAT	GO:0005539~glycosaminoglycan binding	7	6.30631	0.00203646	PLA2G2D, CCL8, SPOCK2, CCN5, SLIT3, RSPO1, THBS1	101	237	18079	5.28692	0.654263	0.197165	0.193381
	GOTERM_MF_FAT	GO:0023026~MHC class II protein complex binding	3	2.7027	0.00227062	CD74, H2-EB1, H2-AB1	101	13	18079	41.3077	0.694051	0.197165	0.193381
	GOTERM_MF_FAT	GO:0008201~heparin binding	6	5.40541	0.00274173	PLA2G2D, CCL8, CCN5, SLIT3, RSPO1, THBS1	101	173	18079	6.20809	0.760788	0.204063	0.200146
	GOTERM_MF_FAT	GO:0008289~lipid binding	13	11.7117	0.00323562	SPON2, APOL9B, PLA2G2D, AKR1CL, APOL9A, PTAFR, ATP1A1, THBS1, MTSS2, CYTH4, AXL, PGR, GAS6	101	876	18079	2.65639	0.815202	0.21072	0.206675
	GOTERM_MF_FAT	GO:0019899~enzyme binding	24	21.6216	0.00447096	ZMYND15, ERRFI1, CSF1R, CD74, EGR2, LRP1, IRS1, WWC1, PTAFR, ISG15, ATP1A1, MTSS2, SLC9A3R1, ZFP36, PARD6B, MYC, MYO5B, PGR, PRTN3, SIK1, EZR, GAS6, PTPN5, H2-AB1	101	2365	18079	1.81649	0.90315	0.244071	0.239387
	GOTERM_MF_FAT	GO:0048018~receptor agonist activity	4	3.6036	0.00468467	GAS6, NBL1, AGT, WNT4	101	61	18079	11.7377	0.913399	0.244071	0.239387
	GOTERM_MF_FAT	GO:0005198~structural molecule activity	11	9.90991	0.0060709	KRT19, CSRP2, RPS29, IRS1, SPOCK2, RPLP1, KRT8, ISG15, RPL38, IGFBP6, THBS1	101	713	18079	2.76157	0.958105	0.258108	0.253154
	GOTERM_MF_FAT	GO:0042802~identical protein binding	24	21.6216	0.00626542	C1QB, ZBP1, H2-T23, CSF1R, AHCY, CEBPD, GPX3, IFI213, HTRA1, IFI211, TAP1, FOS, AQP5, IIGP1, ANO1, SLC9A3R1, MAFB, PGR, IGFBP6, FLNC, PIK3AP1, EZR, NBL1, PTPN5	101	2431	18079	1.76717	0.962166	0.258108	0.253154
	GOTERM_MF_FAT	GO:0042605~peptide antigen binding	4	3.6036	0.00687494	H2-T23, H2-EB1, TAP1, H2-AB1	101	70	18079	10.2286	0.972518	0.258108	0.253154
	GOTERM_MF_FAT	GO:0023023~MHC protein complex binding	3	2.7027	0.00710471	CD74, H2-EB1, H2-AB1	101	23	18079	23.3478	0.975639	0.258108	0.253154
	GOTERM_MF_FAT	GO:0030546~receptor activator activity	4	3.6036	0.00743112	GAS6, NBL1, AGT, WNT4	101	72	18079	9.94444	0.979474	0.258108	0.253154
	GOTERM_MF_FAT	GO:0019955~cytokine binding	5	4.5045	0.00900512	CSF1R, CD74, ZFP36, THBS1, NBL1	101	147	18079	6.08844	0.991021	0.293229	0.287601
	GOTERM_MF_FAT	GO:0005520~insulin-like growth factor binding	3	2.7027	0.0111586	CCN5, HTRA1, IGFBP6	101	29	18079	18.5172	0.997109	0.327684	0.321395
	GOTERM_MF_FAT	GO:0005518~collagen binding	4	3.6036	0.0113211	P3H4, AEBP1, THBS1, CTSS	101	84	18079	8.52381	0.997347	0.327684	0.321395
	GOTERM_MF_FAT	GO:0042562~hormone binding	4	3.6036	0.0136312	CTSH, PGR, ATP1A1, RXFP1	101	90	18079	7.95556	0.999216	0.373782	0.366608
	GOTERM_MF_FAT	GO:1901681~sulfur compound binding	6	5.40541	0.0233757	PLA2G2D, CCL8, CCN5, SLIT3, RSPO1, THBS1	101	293	18079	3.66553	0.999996	0.58054	0.569398
	GOTERM_MF_FAT	GO:0072341~modified amino acid binding	4	3.6036	0.023694	AXL, FOLR2, GAS6, THBS1	101	111	18079	6.45045	0.999996	0.58054	0.569398
	GOTERM_MF_FAT	GO:0019900~kinase binding	11	9.90991	0.0249941	ERRFI1, ZFP36, PARD6B, IRS1, WWC1, PTAFR, SIK1, ATP1A1, GAS6, EZR, PTPN5	101	888	18079	2.21734	0.999998	0.58054	0.569398
	GOTERM_MF_FAT	GO:0030246~carbohydrate binding	6	5.40541	0.0275181	C4B, H2-EB1, P4HA3, CD209F, PLOD2, SIGLEC1	101	306	18079	3.5098	1	0.58054	0.569398
	GOTERM_MF_FAT	GO:0003823~antigen binding	6	5.40541	0.0275181	SPON2, H2-T23, CD74, H2-EB1, TAP1, H2-AB1	101	306	18079	3.5098	1	0.58054	0.569398
	GOTERM_MF_FAT	GO:0030545~receptor regulator activity	4	3.6036	0.0283451	GAS6, NBL1, AGT, WNT4	101	119	18079	6.01681	1	0.58054	0.569398
	GOTERM_MF_FAT	GO:0001968~fibronectin binding	3	2.7027	0.0289713	IGFBP6, THBS1, CTSS	101	48	18079	11.1875	1	0.58054	0.569398
	GOTERM_MF_FAT	GO:0030674~protein binding, bridging	5	4.5045	0.0301327	SOCS2, IRS1, WWC1, STON2, GAS6	101	212	18079	4.2217	1	0.581449	0.570289
	GOTERM_MF_FAT	GO:0019901~protein kinase binding	10	9.00901	0.031446	ERRFI1, ZFP36, PARD6B, IRS1, PTAFR, SIK1, ATP1A1, GAS6, EZR, PTPN5	101	793	18079	2.25725	1	0.585121	0.57389
	GOTERM_MF_FAT	GO:0001664~G-protein coupled receptor binding	6	5.40541	0.0339858	SLC9A3R1, CCL8, RSPO1, AGT, WNT4, CXCL16	101	324	18079	3.31481	1	0.610573	0.598854
	GOTERM_MF_FAT	GO:0071889~14-3-3 protein binding	3	2.7027	0.0384471	H2-T23, ZFP36, SIK1	101	56	18079	9.58929	1	0.667697	0.654882
	GOTERM_MF_FAT	GO:0042287~MHC protein binding	3	2.7027	0.0448867	H2-T23, CD74, TAP1	101	61	18079	8.80328	1	0.730812	0.716785
	GOTERM_MF_FAT	GO:0050840~extracellular matrix binding	3	2.7027	0.0448867	SPOCK2, THBS1, CTSS	101	61	18079	8.80328	1	0.730812	0.716785
	GOTERM_MF_FAT	GO:0060090~binding, bridging	6	5.40541	0.04766	SOCS2, SLC9A3R1, IRS1, WWC1, STON2, GAS6	101	356	18079	3.01685	1	0.75245	0.738008
	GOTERM_MF_FAT	GO:0001786~phosphatidylserine binding	3	2.7027	0.0545134	AXL, GAS6, THBS1	101	68	18079	7.89706	1	0.809627	0.794087
	GOTERM_MF_FAT	GO:0019838~growth factor binding	4	3.6036	0.0547551	CCN5, HTRA1, IGFBP6, THBS1	101	155	18079	4.61935	1	0.809627	0.794087
	GOTERM_MF_FAT	GO:0035254~glutamate receptor binding	3	2.7027	0.0559435	SLC9A3R1, MYO5B, PTPN5	101	69	18079	7.78261	1	0.809627	0.794087
	GOTERM_MF_FAT	GO:0042609~CD4 receptor binding	2	1.8018	0.0644119	CD74, H2-EB1	101	12	18079	29.8333	1	0.906989	0.88958
	GOTERM_MF_FAT	GO:0036312~phosphatidylinositol 3-kinase regulatory subunit binding	2	1.8018	0.0695903	PTPN13, PIK3AP1	101	13	18079	27.5385	1	0.95412	0.935806
	GOTERM_MF_FAT	GO:0038024~cargo receptor activity	3	2.7027	0.0756635	LRP1, FOLR2, CXCL16	101	82	18079	6.54878	1	1	0.982692
	GOTERM_MF_FAT	GO:0043621~protein self-association	3	2.7027	0.0772611	SLC9A3R1, AHCY, CTSH	101	83	18079	6.46988	1	1	0.982692
	GOTERM_MF_FAT	GO:0003735~structural constituent of ribosome	4	3.6036	0.0842099	RPS29, RPLP1, ISG15, RPL38	101	186	18079	3.84946	1	1	0.982692
	GOTERM_MF_FAT	GO:0005159~insulin-like growth factor receptor binding	2	1.8018	0.084956	SOCS2, IRS1	101	16	18079	22.375	1	1	0.982692
	GOTERM_MF_FAT	GO:0033218~amide binding	6	5.40541	0.0868532	H2-T23, CD74, H2-EB1, TAP1, FOLR2, H2-AB1	101	425	18079	2.52706	1	1	0.982692
	GOTERM_MF_FAT	GO:0003700~transcription factor activity, sequence-specific DNA binding	13	11.7117	0.0869304	EGR2, CEBPD, SP110, IFI213, OSR1, IFI211, FOS, AEBP1, AFF3, MYCL, MAFB, MYC, PGR	101	1405	18079	1.65623	1	1	0.982692
	GOTERM_MF_FAT	GO:0001071~nucleic acid binding transcription factor activity	13	11.7117	0.0869304	EGR2, CEBPD, SP110, IFI213, OSR1, IFI211, FOS, AEBP1, AFF3, MYCL, MAFB, MYC, PGR	101	1405	18079	1.65623	1	1	0.982692
	GOTERM_MF_FAT	GO:0048029~monosaccharide binding	3	2.7027	0.0904127	P4HA3, CD209F, PLOD2	101	91	18079	5.9011	1	1	0.982692
	GOTERM_MF_FAT	GO:0097367~carbohydrate derivative binding	19	17.1171	0.0909566	SPON2, CSF1R, PLA2G2D, PTAFR, TAP1, ATP1A1, THBS1, CTSS, IIGP1, RERG, CCL8, AXL, OAS3, SPOCK2, MYO5B, CCN5, SLIT3, SIK1, RSPO1	101	2341	18079	1.4528	1	1	0.982692
	KEGG_PATHWAY	mmu05150:Staphylococcus aureus infection	8	7.20721	3.89563e-05	C1QB, C4B, C1QA, H2-EB1, KRT19, PTAFR, H2-AB1, C1QC	67	128	8992	8.38806	0.00706512	0.00664399	0.00649877
	KEGG_PATHWAY	mmu05171:Coronavirus disease - COVID-19	10	9.00901	7.26119e-05	C1QB, C4B, C1QA, RPS29, OAS3, RPLP1, ISG15, RPL38, FOS, C1QC	67	247	8992	5.43356	0.0131289	0.00664399	0.00649877
	KEGG_PATHWAY	mmu04612:Antigen processing and presentation	6	5.40541	0.000496343	H2-T23, CD74, H2-EB1, TAP1, CTSS, H2-AB1	67	90	8992	8.94726	0.086395	0.0302769	0.0296152
	KEGG_PATHWAY	mmu04145:Phagosome	7	6.30631	0.00210276	H2-T23, H2-EB1, CD209F, TAP1, THBS1, CTSS, H2-AB1	67	182	8992	5.16188	0.318259	0.0877414	0.0858235
	KEGG_PATHWAY	mmu05133:Pertussis	5	4.5045	0.00239731	C1QB, C4B, C1QA, FOS, C1QC	67	77	8992	8.71487	0.353921	0.0877414	0.0858235
	KEGG_PATHWAY	mmu05322:Systemic lupus erythematosus	6	5.40541	0.00450577	C1QB, C4B, C1QA, H2-EB1, H2-AB1, C1QC	67	148	8992	5.4409	0.560406	0.137426	0.134422
	KEGG_PATHWAY	mmu05169:Epstein-Barr virus infection	7	6.30631	0.00677087	H2-T23, H2-EB1, OAS3, MYC, TAP1, ISG15, H2-AB1	67	231	8992	4.06694	0.709598	0.17701	0.173141
	KEGG_PATHWAY	mmu05166:Human T-cell leukemia virus 1 infection	7	6.30631	0.00981591	H2-T23, EGR2, ZFP36, H2-EB1, MYC, FOS, H2-AB1	67	250	8992	3.75785	0.833926	0.224539	0.219631
	KEGG_PATHWAY	mmu04936:Alcoholic liver disease	5	4.5045	0.0197298	C1QB, C4B, C1QA, C1QC, IL17RA	67	141	8992	4.75918	0.973396	0.401172	0.392403
	KEGG_PATHWAY	mmu04658:Th1 and Th2 cell differentiation	4	3.6036	0.0266253	H2-EB1, IL4RA, FOS, H2-AB1	67	88	8992	6.10041	0.992638	0.480924	0.470412
	KEGG_PATHWAY	mmu04610:Complement and coagulation cascades	4	3.6036	0.0306866	C1QB, C4B, C1QA, C1QC	67	93	8992	5.77243	0.996561	0.480924	0.470412
	KEGG_PATHWAY	mmu04640:Hematopoietic cell lineage	4	3.6036	0.031536	CSF1R, H2-EB1, IL4RA, H2-AB1	67	94	8992	5.71102	0.997068	0.480924	0.470412
	KEGG_PATHWAY	mmu05142:Chagas disease	4	3.6036	0.0397316	C1QB, C1QA, FOS, C1QC	67	103	8992	5.212	0.999376	0.52301	0.511578
	KEGG_PATHWAY	mmu04659:Th17 cell differentiation	4	3.6036	0.0416863	H2-EB1, IL4RA, FOS, H2-AB1	67	105	8992	5.11272	0.999569	0.52301	0.511578
	KEGG_PATHWAY	mmu05152:Tuberculosis	5	4.5045	0.0428697	CD74, H2-EB1, CD209F, CTSS, H2-AB1	67	180	8992	3.72803	0.999656	0.52301	0.511578
	KEGG_PATHWAY	mmu05205:Proteoglycans in cancer	5	4.5045	0.0633534	MYC, FLNC, EZR, THBS1, WNT4	67	205	8992	3.27339	0.999993	0.712668	0.697091
	KEGG_PATHWAY	mmu05321:Inflammatory bowel disease	3	2.7027	0.0757626	H2-EB1, IL4RA, H2-AB1	67	62	8992	6.49398	0.999999	0.712668	0.697091
	KEGG_PATHWAY	mmu04210:Apoptosis	4	3.6036	0.0778797	CTSH, FOS, PTPN13, CTSS	67	136	8992	3.94732	1	0.712668	0.697091
	KEGG_PATHWAY	mmu05330:Allograft rejection	3	2.7027	0.0778872	H2-T23, H2-EB1, H2-AB1	67	63	8992	6.3909	1	0.712668	0.697091
	KEGG_PATHWAY	mmu05332:Graft-versus-host disease	3	2.7027	0.0778872	H2-T23, H2-EB1, H2-AB1	67	63	8992	6.3909	1	0.712668	0.697091
	KEGG_PATHWAY	mmu05224:Breast cancer	4	3.6036	0.0931881	MYC, PGR, FOS, WNT4	67	147	8992	3.65194	1	0.742062	0.725842
	KEGG_PATHWAY	mmu05140:Leishmaniasis	3	2.7027	0.0932646	H2-EB1, FOS, H2-AB1	67	70	8992	5.75181	1	0.742062	0.725842
	KEGG_PATHWAY	mmu04940:Type I diabetes mellitus	3	2.7027	0.0932646	H2-T23, H2-EB1, H2-AB1	67	70	8992	5.75181	1	0.742062	0.725842

## Sheet: AS vs CS & AV vs CV common DEGs
Common up (Quadrant 1)	Category	Term	Count	%	PValue	Genes	List Total	Pop Hits	Pop Total	Fold Enrichment	Bonferroni	Benjamini	FDR	Corresponding to figure S5B and C
	GOTERM_BP_FAT	GO:0050853~B cell receptor signaling pathway	15	14.8515	5.67172e-12	IGHV1-82, IGHV1-50, IGHV1-52, IGHV1-11, IGHV1-22, IGHV1-26, IGHG3, IGHV11-2, IGHG2C, IGHG1, IGHA, IGHV5-9, IGLC1, IGHV3-6, SH2B2	96	235	20010	13.3045	1.37879e-08	1.37823e-08	1.33172e-08
	GOTERM_BP_FAT	GO:0006910~phagocytosis, recognition	14	13.8614	1.65995e-11	IGHV1-82, IGHV1-50, IGHV1-52, IGHV1-11, IGHV1-22, IGHV1-26, IGHG3, IGHV11-2, IGHG2C, IGHG1, IGHA, IGHV5-9, IGLC1, IGHV3-6	96	206	20010	14.1657	4.03534e-08	2.01684e-08	1.94878e-08
	GOTERM_BP_FAT	GO:0006958~complement activation, classical pathway	14	13.8614	5.92702e-11	IGHV1-82, IGHV1-50, IGHV1-52, IGHV1-11, IGHV1-22, IGHV1-26, IGHG3, IGHV11-2, IGHG2C, IGHG1, IGHA, IGHV5-9, IGLC1, IGHV3-6	96	228	20010	12.7988	1.44086e-07	4.80089e-08	4.63888e-08
	GOTERM_BP_FAT	GO:0002455~humoral immune response mediated by circulating immunoglobulin	14	13.8614	1.37781e-10	IGHV1-82, IGHV1-50, IGHV1-52, IGHV1-11, IGHV1-22, IGHV1-26, IGHG3, IGHV11-2, IGHG2C, IGHG1, IGHA, IGHV5-9, IGLC1, IGHV3-6	96	244	20010	11.9595	3.34946e-07	8.37021e-08	8.08776e-08
	GOTERM_BP_FAT	GO:0006956~complement activation	14	13.8614	1.95533e-10	IGHV1-82, IGHV1-50, IGHV1-52, IGHV1-11, IGHV1-22, IGHV1-26, IGHG3, IGHV11-2, IGHG2C, IGHG1, IGHA, IGHV5-9, IGLC1, IGHV3-6	96	251	20010	11.626	4.7534e-07	9.5029e-08	9.18222e-08
	GOTERM_BP_FAT	GO:0006911~phagocytosis, engulfment	14	13.8614	2.37687e-10	IGHV1-82, IGHV1-50, IGHV1-52, IGHV1-11, IGHV1-22, IGHV1-26, IGHG3, IGHV11-2, IGHG2C, IGHG1, IGHA, IGHV5-9, IGLC1, IGHV3-6	96	255	20010	11.4436	5.77816e-07	9.62631e-08	9.30147e-08
	GOTERM_BP_FAT	GO:0099024~plasma membrane invagination	14	13.8614	3.6434e-10	IGHV1-82, IGHV1-50, IGHV1-52, IGHV1-11, IGHV1-22, IGHV1-26, IGHG3, IGHV11-2, IGHG2C, IGHG1, IGHA, IGHV5-9, IGLC1, IGHV3-6	96	264	20010	11.0535	8.8571e-07	1.26478e-07	1.2221e-07
	GOTERM_BP_FAT	GO:0010324~membrane invagination	14	13.8614	5.2554e-10	IGHV1-82, IGHV1-50, IGHV1-52, IGHV1-11, IGHV1-22, IGHV1-26, IGHG3, IGHV11-2, IGHG2C, IGHG1, IGHA, IGHV5-9, IGLC1, IGHV3-6	96	272	20010	10.7284	1.27759e-06	1.44213e-07	1.39346e-07
	GOTERM_BP_FAT	GO:0050864~regulation of B cell activation	15	14.8515	5.34121e-10	IGHV1-82, IGHV1-50, IGHV1-52, IGHV1-11, IGHV1-22, IGHV1-26, IGHG3, IGHV11-2, IGHG2C, IGHG1, IGHA, CASP3, IGHV5-9, IGLC1, IGHV3-6	96	331	20010	9.44581	1.29845e-06	1.44213e-07	1.39346e-07
	GOTERM_BP_FAT	GO:0050871~positive regulation of B cell activation	14	13.8614	6.0108e-10	IGHV1-82, IGHV1-50, IGHV1-52, IGHV1-11, IGHV1-22, IGHV1-26, IGHG3, IGHV11-2, IGHG2C, IGHG1, IGHA, IGHV5-9, IGLC1, IGHV3-6	96	275	20010	10.6114	1.46123e-06	1.46063e-07	1.41134e-07
	GOTERM_BP_FAT	GO:0072376~protein activation cascade	14	13.8614	6.86367e-10	IGHV1-82, IGHV1-50, IGHV1-52, IGHV1-11, IGHV1-22, IGHV1-26, IGHG3, IGHV11-2, IGHG2C, IGHG1, IGHA, IGHV5-9, IGLC1, IGHV3-6	96	278	20010	10.4969	1.66856e-06	1.51625e-07	1.46508e-07
	GOTERM_BP_FAT	GO:0008037~cell recognition	15	14.8515	7.86329e-10	IGHV1-82, IGHV1-50, IGHV1-52, IGHV1-11, IGHV1-22, IGHV1-26, IGHG3, IGHV11-2, IGHG2C, IGHG1, IGHA, CASP3, IGHV5-9, IGLC1, IGHV3-6	96	341	20010	9.1688	1.91156e-06	1.59232e-07	1.53858e-07
	GOTERM_BP_FAT	GO:0006637~acyl-CoA metabolic process	10	9.90099	9.25477e-10	ACSM3, PPCS, MPC1, FASN, ELOVL3, ELOVL6, MVD, ACACB, ACACA, PDK1	96	98	20010	21.2691	2.24983e-06	1.60636e-07	1.55216e-07
	GOTERM_BP_FAT	GO:0035383~thioester metabolic process	10	9.90099	9.25477e-10	ACSM3, PPCS, MPC1, FASN, ELOVL3, ELOVL6, MVD, ACACB, ACACA, PDK1	96	98	20010	21.2691	2.24983e-06	1.60636e-07	1.55216e-07
	GOTERM_BP_FAT	GO:0050851~antigen receptor-mediated signaling pathway	15	14.8515	1.82716e-09	IGHV1-82, IGHV1-50, IGHV1-52, IGHV1-11, IGHV1-22, IGHV1-26, IGHG3, IGHV11-2, IGHG2C, IGHG1, IGHA, IGHV5-9, IGLC1, IGHV3-6, SH2B2	96	364	20010	8.58946	4.4418e-06	2.9442e-07	2.84485e-07
	GOTERM_BP_FAT	GO:0006959~humoral immune response	17	16.8317	1.93857e-09	IGHV1-82, IGHV1-50, IGHV1-52, IGHV1-11, IGHV1-22, CXCL13, IGHV1-26, IGHG3, IGHV11-2, IGHG2C, IGHG1, IGHA, IGHV5-9, IGLC1, S100A9, IGHV3-6, CAMP	96	506	20010	7.00284	4.71265e-06	2.9442e-07	2.84485e-07
	GOTERM_BP_FAT	GO:0032787~monocarboxylic acid metabolic process	19	18.8119	4.63187e-09	ACSM3, ENTPD5, INSIG1, ELOVL3, MGST2, MYO5A, ELOVL6, ENO1, ACACB, ACACA, ACAT2, FABP5, MPC1, FASN, ASPG, LIPG, ME1, ME2, PDK1	96	702	20010	5.64147	1.126e-05	6.62085e-07	6.39743e-07
	GOTERM_BP_FAT	GO:0006633~fatty acid biosynthetic process	11	10.8911	6.11306e-09	FABP5, ACSM3, FASN, INSIG1, LIPG, ELOVL3, MGST2, MYO5A, ELOVL6, ACACB, ACACA	96	165	20010	13.8958	1.48607e-05	8.25263e-07	7.97415e-07
	GOTERM_BP_FAT	GO:0044283~small molecule biosynthetic process	17	16.8317	6.51676e-09	IDI1, ACSM3, INSIG1, ELOVL3, MGST2, MYO5A, ELOVL6, MSMO1, ENO1, ACACB, ACACA, CYP51, FABP5, FASN, LIPG, LEPR, MVD	96	551	20010	6.43092	1.58421e-05	8.33459e-07	8.05334e-07
	GOTERM_BP_FAT	GO:0002429~immune response-activating cell surface receptor signaling pathway	15	14.8515	7.14207e-09	IGHV1-82, IGHV1-50, IGHV1-52, IGHV1-11, IGHV1-22, IGHV1-26, IGHG3, IGHV11-2, IGHG2C, IGHG1, IGHA, IGHV5-9, IGLC1, IGHV3-6, SH2B2	96	405	20010	7.71991	1.73622e-05	8.67761e-07	8.38479e-07
	GOTERM_BP_FAT	GO:0035384~thioester biosynthetic process	7	6.93069	8.00472e-09	PPCS, MPC1, ELOVL3, ELOVL6, ACACB, ACACA, PDK1	96	32	20010	45.5957	1.94593e-05	8.84157e-07	8.54321e-07
	GOTERM_BP_FAT	GO:0071616~acyl-CoA biosynthetic process	7	6.93069	8.00472e-09	PPCS, MPC1, ELOVL3, ELOVL6, ACACB, ACACA, PDK1	96	32	20010	45.5957	1.94593e-05	8.84157e-07	8.54321e-07
	GOTERM_BP_FAT	GO:0016064~immunoglobulin mediated immune response	14	13.8614	9.95332e-09	IGHV1-82, IGHV1-50, IGHV1-52, IGHV1-11, IGHV1-22, IGHV1-26, IGHG3, IGHV11-2, IGHG2C, IGHG1, IGHA, IGHV5-9, IGLC1, IGHV3-6	96	347	20010	8.40958	2.41962e-05	1.04631e-06	1.01101e-06
	GOTERM_BP_FAT	GO:0002768~immune response-regulating cell surface receptor signaling pathway	15	14.8515	1.0334e-08	IGHV1-82, IGHV1-50, IGHV1-52, IGHV1-11, IGHV1-22, IGHV1-26, IGHG3, IGHV11-2, IGHG2C, IGHG1, IGHA, IGHV5-9, IGLC1, IGHV3-6, SH2B2	96	417	20010	7.49775	2.51215e-05	1.04631e-06	1.01101e-06
	GOTERM_BP_FAT	GO:0019724~B cell mediated immunity	14	13.8614	1.17979e-08	IGHV1-82, IGHV1-50, IGHV1-52, IGHV1-11, IGHV1-22, IGHV1-26, IGHG3, IGHV11-2, IGHG2C, IGHG1, IGHA, IGHV5-9, IGLC1, IGHV3-6	96	352	20010	8.29013	2.86803e-05	1.14676e-06	1.10806e-06
	GOTERM_BP_FAT	GO:0006732~coenzyme metabolic process	14	13.8614	1.99671e-08	ACSM3, ENTPD5, ELOVL3, ELOVL6, ENO1, ACACB, ACACA, PPCS, MPC1, FASN, ME1, MVD, ME2, PDK1	96	368	20010	7.92969	4.85388e-05	1.86615e-06	1.80318e-06
	GOTERM_BP_FAT	GO:0006909~phagocytosis	15	14.8515	2.14852e-08	IGHV1-82, IGHV1-50, IGHV1-52, IGHV1-11, IGHV1-22, IGHV1-26, IGHG3, IGHV11-2, IGHG2C, IGHG1, IGHA, IGHV5-9, LEPR, IGLC1, IGHV3-6	96	442	20010	7.07367	5.22292e-05	1.93367e-06	1.86842e-06
	GOTERM_BP_FAT	GO:0008610~lipid biosynthetic process	17	16.8317	8.71529e-08	IDI1, ACSM3, INSIG1, ELOVL3, MGST2, MYO5A, ELOVL6, MSMO1, ACACB, AGPAT2, ACACA, CYP51, FABP5, FASN, LIPG, THRSP, MVD	96	664	20010	5.3365	0.000211846	7.56362e-06	7.30839e-06
	GOTERM_BP_FAT	GO:0072330~monocarboxylic acid biosynthetic process	11	10.8911	9.41091e-08	FABP5, ACSM3, FASN, INSIG1, LIPG, ELOVL3, MGST2, MYO5A, ELOVL6, ACACB, ACACA	96	220	20010	10.4219	0.000228753	7.8857e-06	7.6196e-06
	GOTERM_BP_FAT	GO:0042113~B cell activation	15	14.8515	1.03993e-07	IGHV1-82, IGHV1-50, IGHV1-52, IGHV1-11, IGHV1-22, IGHV1-26, IGHG3, IGHV11-2, IGHG2C, IGHG1, IGHA, CASP3, IGHV5-9, IGLC1, IGHV3-6	96	502	20010	6.22821	0.000252776	8.3271e-06	8.04611e-06
	GOTERM_BP_FAT	GO:0042742~defense response to bacterium	16	15.8416	1.06231e-07	IGHV1-82, IGHV1-50, IGHV1-52, IGHV1-11, IGHV1-22, CXCL13, IGHV1-26, IGHG3, IGHV11-2, IGHG2C, IGHG1, IGHA, IGHV5-9, IGLC1, IGHV3-6, CAMP	96	586	20010	5.69113	0.000258213	8.3271e-06	8.04611e-06
	GOTERM_BP_FAT	GO:0002696~positive regulation of leukocyte activation	16	15.8416	1.13484e-07	IGHV1-82, IGHV1-50, IGHV1-52, IGHV1-11, IGHV1-22, MMP8, IGHV1-26, IGHG3, IGHV11-2, IGHG2C, IGHG1, IGHA, IGHV5-9, IGLC1, IGHV3-6, CD177	96	589	20010	5.66214	0.000275842	8.48307e-06	8.19681e-06
	GOTERM_BP_FAT	GO:0006955~immune response	30	29.703	1.15202e-07	IGHV1-82, IGKV8-16, IGHV1-22, CXCL13, IGHV1-26, IGHG3, IGHG1, IGKV10-94, IGKV9-124, IGHV5-9, IGLC1, IGHV3-6, SH2B2, CAMP, IGKV14-126, CD177, IGKV6-23, IGKV8-24, IGHV1-50, IGHV1-52, IGHV1-11, IGKV13-84, IGLV2, IGLV1, IGHV11-2, IGHG2C, IGHA, S100A9, H2-Q10, S100A8	96	2148	20010	2.91114	0.000280017	8.48307e-06	8.19681e-06
	GOTERM_BP_FAT	GO:0009617~response to bacterium	22	21.7822	1.44092e-07	IGHV1-82, IGHV1-50, IGHV1-52, CHD7, IGHV1-11, IGHV1-22, CXCL13, IGHV1-26, IGHG3, IGHV11-2, IGHG2C, IGHG1, IGHA, CASP3, IGHV5-9, IGLC1, THRSP, S100A9, IGHV3-6, S100A8, CAMP, FKBP5	96	1194	20010	3.84056	0.000350225	1.02983e-05	9.9508e-06
	GOTERM_BP_FAT	GO:0050867~positive regulation of cell activation	16	15.8416	2.0632e-07	IGHV1-82, IGHV1-50, IGHV1-52, IGHV1-11, IGHV1-22, MMP8, IGHV1-26, IGHG3, IGHV11-2, IGHG2C, IGHG1, IGHA, IGHV5-9, IGLC1, IGHV3-6, CD177	96	617	20010	5.40519	0.000501437	1.43245e-05	1.38411e-05
	GOTERM_BP_FAT	GO:0051186~cofactor metabolic process	14	13.8614	2.34875e-07	ACSM3, ENTPD5, ELOVL3, ELOVL6, ENO1, ACACB, ACACA, PPCS, MPC1, FASN, ME1, MVD, ME2, PDK1	96	455	20010	6.41346	0.000570818	1.58541e-05	1.53191e-05
	GOTERM_BP_FAT	GO:0002449~lymphocyte mediated immunity	15	14.8515	2.95453e-07	IGHV1-82, IGHV1-50, IGHV1-52, IGHV1-11, IGHV1-22, IGHV1-26, IGHG3, IGHV11-2, IGHG2C, IGHG1, IGHA, IGHV5-9, IGLC1, IGHV3-6, H2-Q10	96	547	20010	5.71584	0.000717988	1.94041e-05	1.87493e-05
	GOTERM_BP_FAT	GO:0002460~adaptive immune response based on somatic recombination of immune receptors built from immunoglobulin superfamily domains	15	14.8515	3.36975e-07	IGHV1-82, IGHV1-50, IGHV1-52, IGHV1-11, IGHV1-22, IGHV1-26, IGHG3, IGHV11-2, IGHG2C, IGHG1, IGHA, IGHV5-9, IGLC1, IGHV3-6, H2-Q10	96	553	20010	5.65382	0.000818851	2.15487e-05	2.08215e-05
	GOTERM_BP_FAT	GO:0006629~lipid metabolic process	24	23.7624	3.89284e-07	IDI1, ACSM3, INSIG1, ELOVL3, CIDEA, MGST2, MYO5A, ELOVL6, MSMO1, ACACB, SORL1, AGPAT2, ACACA, ACAT2, CYP51, FABP5, RDH11, FASN, ASPG, LIPG, LEPR, THRSP, MVD, PDK1	96	1502	20010	3.33056	0.000945902	2.42554e-05	2.34369e-05
	GOTERM_BP_FAT	GO:0002757~immune response-activating signal transduction	15	14.8515	4.64721e-07	IGHV1-82, IGHV1-50, IGHV1-52, IGHV1-11, IGHV1-22, IGHV1-26, IGHG3, IGHV11-2, IGHG2C, IGHG1, IGHA, IGHV5-9, IGLC1, IGHV3-6, SH2B2	96	568	20010	5.50451	0.0011291	2.82318e-05	2.72791e-05
	GOTERM_BP_FAT	GO:0002443~leukocyte mediated immunity	16	15.8416	5.66012e-07	IGHV1-82, IGHV1-50, IGHV1-52, IGHV1-11, IGHV1-22, IGHV1-26, IGHG3, IGHV11-2, IGHG2C, IGHG1, IGHA, IGHV5-9, IGLC1, IGHV3-6, H2-Q10, CD177	96	668	20010	4.99251	0.00137503	3.35466e-05	3.24145e-05
	GOTERM_BP_FAT	GO:0002764~immune response-regulating signaling pathway	15	14.8515	6.09042e-07	IGHV1-82, IGHV1-50, IGHV1-52, IGHV1-11, IGHV1-22, IGHV1-26, IGHG3, IGHV11-2, IGHG2C, IGHG1, IGHA, IGHV5-9, IGLC1, IGHV3-6, SH2B2	96	581	20010	5.38135	0.00147949	3.52375e-05	3.40484e-05
	GOTERM_BP_FAT	GO:0006084~acetyl-CoA metabolic process	6	5.94059	6.28993e-07	PPCS, MPC1, FASN, MVD, ACACB, ACACA	96	35	20010	35.7321	0.00152791	3.55454e-05	3.43459e-05
	GOTERM_BP_FAT	GO:0044255~cellular lipid metabolic process	20	19.802	9.24407e-07	IDI1, ACSM3, INSIG1, ELOVL3, MGST2, MYO5A, ELOVL6, ACACB, SORL1, AGPAT2, ACACA, ACAT2, FABP5, RDH11, FASN, ASPG, LIPG, THRSP, MVD, PDK1	96	1108	20010	3.76241	0.00224471	5.10525e-05	4.93297e-05
	GOTERM_BP_FAT	GO:0019752~carboxylic acid metabolic process	19	18.8119	9.80873e-07	ACSM3, ENTPD5, INSIG1, ELOVL3, MGST2, MYO5A, ELOVL6, ENO1, ACACB, ACACA, ACAT2, FABP5, MPC1, FASN, ASPG, LIPG, ME1, ME2, PDK1	96	1003	20010	3.94847	0.00238166	5.29671e-05	5.11798e-05
	GOTERM_BP_FAT	GO:0051251~positive regulation of lymphocyte activation	14	13.8614	1.13002e-06	IGHV1-82, IGHV1-50, IGHV1-52, IGHV1-11, IGHV1-22, IGHV1-26, IGHG3, IGHV11-2, IGHG2C, IGHG1, IGHA, IGHV5-9, IGLC1, IGHV3-6	96	523	20010	5.57959	0.0027433	5.96944e-05	5.768e-05
	GOTERM_BP_FAT	GO:0002694~regulation of leukocyte activation	17	16.8317	1.52769e-06	IGHV1-82, IGHV1-50, IGHV1-52, IGHV1-11, IGHV1-22, MMP8, IGHV1-26, IGHG3, IGHV11-2, IGHG2C, IGHG1, IGHA, CASP3, IGHV5-9, IGLC1, IGHV3-6, CD177	96	823	20010	4.30551	0.00370694	7.8985e-05	7.63197e-05
	GOTERM_BP_FAT	GO:0046394~carboxylic acid biosynthetic process	11	10.8911	1.88152e-06	FABP5, ACSM3, FASN, INSIG1, LIPG, ELOVL3, MGST2, MYO5A, ELOVL6, ACACB, ACACA	96	305	20010	7.51742	0.00456353	9.33078e-05	9.01592e-05
	GOTERM_BP_FAT	GO:0016053~organic acid biosynthetic process	11	10.8911	1.88152e-06	FABP5, ACSM3, FASN, INSIG1, LIPG, ELOVL3, MGST2, MYO5A, ELOVL6, ACACB, ACACA	96	305	20010	7.51742	0.00456353	9.33078e-05	9.01592e-05
	GOTERM_BP_FAT	GO:0002253~activation of immune response	15	14.8515	2.77698e-06	IGHV1-82, IGHV1-50, IGHV1-52, IGHV1-11, IGHV1-22, IGHV1-26, IGHG3, IGHV11-2, IGHG2C, IGHG1, IGHA, IGHV5-9, IGLC1, IGHV3-6, SH2B2	96	661	20010	4.73005	0.00672812	0.000132883	0.000128399
	GOTERM_BP_FAT	GO:0006631~fatty acid metabolic process	13	12.8713	2.78891e-06	ACSM3, INSIG1, ELOVL3, MGST2, MYO5A, ELOVL6, ACACB, ACACA, ACAT2, FABP5, FASN, LIPG, PDK1	96	479	20010	5.65697	0.00675692	0.000132883	0.000128399
	GOTERM_BP_FAT	GO:0044272~sulfur compound biosynthetic process	8	7.92079	3.16029e-06	PPCS, MPC1, ELOVL3, MGST2, ELOVL6, ACACB, ACACA, PDK1	96	132	20010	12.6326	0.00765323	0.000146333	0.000141395
	GOTERM_BP_FAT	GO:0043436~oxoacid metabolic process	19	18.8119	3.19163e-06	ACSM3, ENTPD5, INSIG1, ELOVL3, MGST2, MYO5A, ELOVL6, ENO1, ACACB, ACACA, ACAT2, FABP5, MPC1, FASN, ASPG, LIPG, ME1, ME2, PDK1	96	1090	20010	3.63331	0.00772884	0.000146333	0.000141395
	GOTERM_BP_FAT	GO:0050865~regulation of cell activation	17	16.8317	3.51719e-06	IGHV1-82, IGHV1-50, IGHV1-52, IGHV1-11, IGHV1-22, MMP8, IGHV1-26, IGHG3, IGHV11-2, IGHG2C, IGHG1, IGHA, CASP3, IGHV5-9, IGLC1, IGHV3-6, CD177	96	878	20010	4.03581	0.00851386	0.000157466	0.000152152
	GOTERM_BP_FAT	GO:0002250~adaptive immune response	16	15.8416	3.56404e-06	IGHV1-82, IGHV1-50, IGHV1-52, IGHV1-11, IGHV1-22, IGLV2, IGHV1-26, IGHG3, IGHV11-2, IGHG2C, IGHG1, IGHA, IGHV5-9, IGLC1, IGHV3-6, H2-Q10	96	775	20010	4.30323	0.00862676	0.000157466	0.000152152
	GOTERM_BP_FAT	GO:0006082~organic acid metabolic process	19	18.8119	4.06284e-06	ACSM3, ENTPD5, INSIG1, ELOVL3, MGST2, MYO5A, ELOVL6, ENO1, ACACB, ACACA, ACAT2, FABP5, MPC1, FASN, ASPG, LIPG, ME1, ME2, PDK1	96	1109	20010	3.57107	0.00982818	0.000176298	0.000170349
	GOTERM_BP_FAT	GO:0045321~leukocyte activation	20	19.802	4.84685e-06	IGHV1-82, IGHV1-50, IGHV1-52, CHD7, IGHV1-11, IGHV1-22, MMP8, IGHV1-26, IGHG3, IGHV11-2, IGHG2C, IGHG1, IGHA, CASP3, IGHV5-9, LEPR, IGLC1, IGHV3-6, CAMP, CD177	96	1240	20010	3.3619	0.0117136	0.000206629	0.000199656
	GOTERM_BP_FAT	GO:0050778~positive regulation of immune response	17	16.8317	6.02409e-06	IGHV1-82, IGHV1-50, IGHV1-52, IGHV1-11, IGHV1-22, IGHV1-26, IGHG3, IGHV11-2, IGHG2C, IGHG1, IGHA, IGHV5-9, IGLC1, IGHV3-6, SH2B2, H2-Q10, CD177	96	916	20010	3.86838	0.0145379	0.000251931	0.00024343
	GOTERM_BP_FAT	GO:0051249~regulation of lymphocyte activation	15	14.8515	6.11684e-06	IGHV1-82, IGHV1-50, IGHV1-52, IGHV1-11, IGHV1-22, IGHV1-26, IGHG3, IGHV11-2, IGHG2C, IGHG1, IGHA, CASP3, IGHV5-9, IGLC1, IGHV3-6	96	708	20010	4.41605	0.0147601	0.000251931	0.00024343
	GOTERM_BP_FAT	GO:0051707~response to other organism	22	21.7822	1.14833e-05	IGHV1-82, IGHV1-50, IGHV1-52, CHD7, IGHV1-11, IGHV1-22, CXCL13, IGHV1-26, IGHG3, IGHV11-2, IGHG2C, IGHG1, IGHA, CASP3, IGHV5-9, IGLC1, THRSP, S100A9, IGHV3-6, S100A8, CAMP, FKBP5	96	1569	20010	2.92264	0.02753	0.000465074	0.00044938
	GOTERM_BP_FAT	GO:0043207~response to external biotic stimulus	22	21.7822	1.18223e-05	IGHV1-82, IGHV1-50, IGHV1-52, CHD7, IGHV1-11, IGHV1-22, CXCL13, IGHV1-26, IGHG3, IGHV11-2, IGHG2C, IGHG1, IGHA, CASP3, IGHV5-9, IGLC1, THRSP, S100A9, IGHV3-6, S100A8, CAMP, FKBP5	96	1572	20010	2.91706	0.0283311	0.000470955	0.000455062
	GOTERM_BP_FAT	GO:0009108~coenzyme biosynthetic process	7	6.93069	1.26522e-05	PPCS, MPC1, ELOVL3, ELOVL6, ACACB, ACACA, PDK1	96	108	20010	13.5098	0.0302894	0.000495883	0.00047915
	GOTERM_BP_FAT	GO:0006790~sulfur compound metabolic process	11	10.8911	1.36597e-05	ACSM3, PPCS, MPC1, FASN, ELOVL3, MGST2, ELOVL6, MVD, ACACB, ACACA, PDK1	96	382	20010	6.00213	0.0326617	0.000526875	0.000509095
	GOTERM_BP_FAT	GO:0006897~endocytosis	16	15.8416	1.78492e-05	IGHV1-82, IGHV1-50, IGHV1-52, IGHV1-11, IGHV1-22, IGHV1-26, SORL1, IGHG3, IGHV11-2, IGHG2C, IGHG1, IGHA, IGHV5-9, LEPR, IGLC1, IGHV3-6	96	887	20010	3.75986	0.0424638	0.000677712	0.000654842
	GOTERM_BP_FAT	GO:0098542~defense response to other organism	16	15.8416	1.93127e-05	IGHV1-82, IGHV1-50, IGHV1-52, IGHV1-11, IGHV1-22, CXCL13, IGHV1-26, IGHG3, IGHV11-2, IGHG2C, IGHG1, IGHA, IGHV5-9, IGLC1, IGHV3-6, CAMP	96	893	20010	3.7346	0.0458646	0.000722	0.000697636
	GOTERM_BP_FAT	GO:0001775~cell activation	20	19.802	1.97441e-05	IGHV1-82, IGHV1-50, IGHV1-52, CHD7, IGHV1-11, IGHV1-22, MMP8, IGHV1-26, IGHG3, IGHV11-2, IGHG2C, IGHG1, IGHA, CASP3, IGHV5-9, LEPR, IGLC1, IGHV3-6, CAMP, CD177	96	1369	20010	3.04511	0.0468646	0.000726941	0.00070241
	GOTERM_BP_FAT	GO:0045087~innate immune response	18	17.8218	2.05192e-05	IGHV1-82, IGHV1-50, IGHV1-52, IGHV1-11, IGHV1-22, IGHV1-26, IGHG3, IGHV11-2, IGHG2C, IGHG1, IGHA, IGHV5-9, IGLC1, S100A9, IGHV3-6, S100A8, CAMP, CD177	96	1128	20010	3.32613	0.048659	0.000743893	0.000718791
	GOTERM_BP_FAT	GO:0009607~response to biotic stimulus	22	21.7822	2.08168e-05	IGHV1-82, IGHV1-50, IGHV1-52, CHD7, IGHV1-11, IGHV1-22, CXCL13, IGHV1-26, IGHG3, IGHV11-2, IGHG2C, IGHG1, IGHA, CASP3, IGHV5-9, IGLC1, THRSP, S100A9, IGHV3-6, S100A8, CAMP, FKBP5	96	1632	20010	2.80982	0.0493469	0.000743893	0.000718791
	GOTERM_BP_FAT	GO:0046649~lymphocyte activation	17	16.8317	3.00181e-05	IGHV1-82, IGHV1-50, IGHV1-52, CHD7, IGHV1-11, IGHV1-22, IGHV1-26, IGHG3, IGHV11-2, IGHG2C, IGHG1, IGHA, CASP3, IGHV5-9, LEPR, IGLC1, IGHV3-6	96	1043	20010	3.39735	0.070376	0.00105716	0.00102149
	GOTERM_BP_FAT	GO:0061024~membrane organization	18	17.8218	4.04368e-05	IGHV1-82, IGHV1-50, ATP8A1, IGHV1-52, INSIG1, IGHV1-11, IGHV1-22, MYO5A, IGHV1-26, IGHG3, IGHV11-2, IGHG2C, IGHG1, IGHA, IGHV5-9, IGLC1, S100A9, IGHV3-6	96	1190	20010	3.15284	0.0936264	0.00140373	0.00135636
	GOTERM_BP_FAT	GO:0002684~positive regulation of immune system process	19	18.8119	4.19078e-05	IGHV1-82, IGHV1-50, IGHV1-52, IGHV1-11, IGHV1-22, CXCL13, MMP8, IGHV1-26, IGHG3, IGHV11-2, IGHG2C, IGHG1, IGHA, IGHV5-9, IGLC1, IGHV3-6, SH2B2, H2-Q10, CD177	96	1318	20010	3.00479	0.096862	0.00143431	0.00138591
	GOTERM_BP_FAT	GO:0002377~immunoglobulin production	9	8.91089	5.10218e-05	IGKV6-23, IGKV8-24, IGHG1, IGKV8-16, IGKV10-94, IGKV9-124, IGKV13-84, IGKV14-126, IGLV1	96	276	20010	6.79688	0.116653	0.00172199	0.00166388
	GOTERM_BP_FAT	GO:0050776~regulation of immune response	17	16.8317	7.18142e-05	IGHV1-82, IGHV1-50, IGHV1-52, IGHV1-11, IGHV1-22, IGHV1-26, IGHG3, IGHV11-2, IGHG2C, IGHG1, IGHA, IGHV5-9, IGLC1, IGHV3-6, SH2B2, H2-Q10, CD177	96	1122	20010	3.15814	0.160196	0.00239053	0.00230986
	GOTERM_BP_FAT	GO:0002682~regulation of immune system process	22	21.7822	8.95237e-05	IGHV1-82, IGHV1-50, IGHV1-52, IGHV1-11, IGHV1-22, CXCL13, MMP8, IGHV1-26, IGHG3, IGHV11-2, IGHG2C, IGHG1, RASSF2, IGHA, CASP3, IGHV5-9, PIM1, IGLC1, IGHV3-6, SH2B2, H2-Q10, CD177	96	1803	20010	2.54333	0.195587	0.00293977	0.00284056
	GOTERM_BP_FAT	GO:0048584~positive regulation of response to stimulus	28	27.7228	9.2515e-05	IGHV1-82, IGHV1-22, GLRX, LPAR3, CXCL13, IGHV1-26, IGHG3, IGHG1, RASSF2, IGHV5-9, LEPR, IGLC1, IGHV3-6, SH2B2, CD177, IGHV1-50, IGHV1-52, IGHV1-11, MYO5A, MMP8, SORL1, IGHV11-2, IGHG2C, FABP5, IGHA, S100A9, H2-Q10, S100A8	96	2689	20010	2.17042	0.201415	0.00299748	0.00289634
	GOTERM_BP_FAT	GO:1902653~secondary alcohol biosynthetic process	5	4.9505	0.000135074	IDI1, INSIG1, MSMO1, MVD, CYP51	96	55	20010	18.9489	0.279916	0.00426273	0.00411888
	GOTERM_BP_FAT	GO:0006695~cholesterol biosynthetic process	5	4.9505	0.000135074	IDI1, INSIG1, MSMO1, MVD, CYP51	96	55	20010	18.9489	0.279916	0.00426273	0.00411888
	GOTERM_BP_FAT	GO:0051188~cofactor biosynthetic process	7	6.93069	0.000145369	PPCS, MPC1, ELOVL3, ELOVL6, ACACB, ACACA, PDK1	96	167	20010	8.7369	0.297716	0.00452879	0.00437597
	GOTERM_BP_FAT	GO:0016126~sterol biosynthetic process	5	4.9505	0.000202235	IDI1, INSIG1, MSMO1, MVD, CYP51	96	61	20010	17.085	0.388404	0.00622064	0.00601073
	GOTERM_BP_FAT	GO:0002252~immune effector process	16	15.8416	0.000273173	IGHV1-82, IGHV1-50, IGHV1-52, IGHV1-11, IGHV1-22, IGHV1-26, IGHG3, IGHV11-2, IGHG2C, IGHG1, IGHA, IGHV5-9, IGLC1, IGHV3-6, H2-Q10, CD177	96	1131	20010	2.94872	0.485302	0.00829764	0.00801764
	GOTERM_BP_FAT	GO:0006952~defense response	22	21.7822	0.000370332	IGHV1-82, IGHV1-50, IGHV1-52, IGHV1-11, IGHV1-22, CXCL13, IGHV1-26, IGHG3, IGHV11-2, IGHG2C, IGHG1, IGHA, NGP, FASN, IGHV5-9, IGLC1, CHIL3, S100A9, IGHV3-6, S100A8, CAMP, CD177	96	1997	20010	2.29626	0.593611	0.0110014	0.0106301
	GOTERM_BP_FAT	GO:0016192~vesicle-mediated transport	20	19.802	0.000371239	IGHV1-82, IGHV1-50, IGHV1-52, INSIG1, IGHV1-11, IGHV1-22, MYO5A, GLRX, IGHV1-26, SORL1, IGHG3, IGHV11-2, IGHG2C, IGHG1, IGHA, IGHV5-9, LEPR, IGLC1, IGHV3-6, CD177	96	1708	20010	2.44072	0.594506	0.0110014	0.0106301
	GOTERM_BP_FAT	GO:0008203~cholesterol metabolic process	6	5.94059	0.000511184	IDI1, INSIG1, LEPR, MSMO1, MVD, CYP51	96	138	20010	9.0625	0.711485	0.014966	0.014461
	GOTERM_BP_FAT	GO:1902652~secondary alcohol metabolic process	6	5.94059	0.000640129	IDI1, INSIG1, LEPR, MSMO1, MVD, CYP51	96	145	20010	8.625	0.789159	0.018518	0.0178931
	GOTERM_BP_FAT	GO:0016125~sterol metabolic process	6	5.94059	0.000681084	IDI1, INSIG1, LEPR, MSMO1, MVD, CYP51	96	147	20010	8.50765	0.809152	0.019471	0.0188139
	GOTERM_BP_FAT	GO:0002440~production of molecular mediator of immune response	9	8.91089	0.000984374	IGKV6-23, IGKV8-24, IGHG1, IGKV8-16, IGKV10-94, IGKV9-124, IGKV13-84, IGKV14-126, IGLV1	96	428	20010	4.38303	0.908754	0.0278143	0.0268757
	GOTERM_BP_FAT	GO:0006793~phosphorus metabolic process	29	28.7129	0.00116513	IDI1, ACSM3, GDA, LPAR3, ENO1, ACACB, AGPAT2, ACACA, RASSF2, PPCS, MPC1, CASP3, LEPR, PIM1, ME1, ME2, CAMP, PDK1, ENTPD5, ELOVL3, ELOVL6, MMP8, SORL1, ADCY10, FABP5, FASN, ASPG, MVD, MT-CO2	96	3309	20010	1.82674	0.941228	0.0325434	0.0314452
	GOTERM_BP_FAT	GO:0006090~pyruvate metabolic process	5	4.9505	0.0020021	MPC1, ENTPD5, ME1, ME2, ENO1	96	112	20010	9.30525	0.992342	0.0552852	0.0534196
	GOTERM_BP_FAT	GO:0019637~organophosphate metabolic process	14	13.8614	0.00210313	IDI1, GDA, ENTPD5, ENO1, AGPAT2, ADCY10, FABP5, PPCS, MPC1, ASPG, ME1, MT-CO2, MVD, ME2	96	1103	20010	2.64563	0.994013	0.0574226	0.0554849
	GOTERM_BP_FAT	GO:0009605~response to external stimulus	27	26.7327	0.00252122	IGHV1-82, CHD7, IGHV1-22, CXCL13, IGHV1-26, ACACB, IGHG3, IGHG1, RDH11, CASP3, LIPG, IGHV5-9, PIM1, IGLC1, IGHV3-6, CAMP, IGHV1-50, IGHV1-52, IGHV1-11, SORL1, IGHV11-2, IGHG2C, IGHA, THRSP, S100A9, S100A8, FKBP5	96	3139	20010	1.79287	0.997838	0.068073	0.0657759
	GOTERM_BP_FAT	GO:1905954~positive regulation of lipid localization	5	4.9505	0.00273136	ATP8A1, LIPG, CIDEA, ACACB, ACAT2	96	122	20010	8.54252	0.998705	0.0729362	0.070475
	GOTERM_BP_FAT	GO:0046165~alcohol biosynthetic process	5	4.9505	0.00343218	IDI1, INSIG1, MSMO1, MVD, CYP51	96	130	20010	8.01683	0.999765	0.0906544	0.0875953
	GOTERM_BP_FAT	GO:0051196~regulation of coenzyme metabolic process	4	3.9604	0.00382114	ENTPD5, ME1, ME2, PDK1	96	66	20010	12.6326	0.999909	0.0998428	0.0964736
	GOTERM_BP_FAT	GO:1901617~organic hydroxy compound biosynthetic process	6	5.94059	0.00455618	IDI1, INSIG1, MYO5A, MSMO1, MVD, CYP51	96	227	20010	5.50936	0.999985	0.117782	0.113808
	GOTERM_BP_FAT	GO:0051193~regulation of cofactor metabolic process	4	3.9604	0.00487932	ENTPD5, ME1, ME2, PDK1	96	72	20010	11.5799	0.999993	0.124808	0.120596
	GOTERM_BP_FAT	GO:0006636~unsaturated fatty acid biosynthetic process	4	3.9604	0.00507113	FABP5, ELOVL3, MGST2, ELOVL6	96	73	20010	11.4212	0.999996	0.127958	0.12364
	GOTERM_BP_FAT	GO:0006066~alcohol metabolic process	7	6.93069	0.00510777	IDI1, RDH11, INSIG1, LEPR, MSMO1, MVD, CYP51	96	333	20010	4.38157	0.999996	0.127958	0.12364
	GOTERM_BP_FAT	GO:0007166~cell surface receptor signaling pathway	24	23.7624	0.00619751	IGHV1-82, IGHV1-50, IGHV1-52, IGHV1-11, CIDEA, IGHV1-22, ATP1A3, GLRX, CXCL13, IGHV1-26, SORL1, IGHG3, IGHV11-2, IGHG2C, IGHG1, RASSF2, IGHA, CASP3, IGHV5-9, LEPR, IGLC1, IGHV3-6, SH2B2, PDK1	96	2837	20010	1.76331	1	0.153673	0.148487
	GOTERM_BP_FAT	GO:0016042~lipid catabolic process	7	6.93069	0.00630105	ASPG, LIPG, CIDEA, MGST2, ACACB, SORL1, ACAT2	96	348	20010	4.19271	1	0.154662	0.149443
	GOTERM_BP_FAT	GO:0051049~regulation of transport	19	18.8119	0.00682427	ATP8A1, INSIG1, CHD7, KCNJ15, MYO5A, GLRX, LPAR3, SORL1, ACAT2, CYP51, IGHG1, FABP5, LIPG, LEPR, PIM1, S100A9, S100A8, SH2B2, CD177	96	2035	20010	1.9461	1	0.16583	0.160234
	GOTERM_BP_FAT	GO:0002790~peptide secretion	8	7.92079	0.00780813	CHD7, LEPR, MYO5A, GLRX, SORL1, S100A9, S100A8, CYP51	96	479	20010	3.48121	1	0.187859	0.18152
	GOTERM_BP_FAT	GO:0010876~lipid localization	8	7.92079	0.00806671	GRAMD1B, STARD5, FABP5, ATP8A1, LIPG, CIDEA, ACACB, ACAT2	96	482	20010	3.45954	1	0.192177	0.185692
	GOTERM_BP_FAT	GO:0050995~negative regulation of lipid catabolic process	3	2.9703	0.00833068	CIDEA, ACACB, SORL1	96	29	20010	21.5625	1	0.196539	0.189907
	GOTERM_BP_FAT	GO:0002791~regulation of peptide secretion	7	6.93069	0.00861582	CHD7, LEPR, GLRX, SORL1, S100A9, S100A8, CYP51	96	372	20010	3.92221	1	0.199437	0.192707
	GOTERM_BP_FAT	GO:0006694~steroid biosynthetic process	5	4.9505	0.00861765	IDI1, INSIG1, MSMO1, MVD, CYP51	96	169	20010	6.16679	1	0.199437	0.192707
	GOTERM_BP_FAT	GO:0006140~regulation of nucleotide metabolic process	5	4.9505	0.00879384	ENTPD5, ME1, MT-CO2, ME2, ENO1	96	170	20010	6.13051	1	0.201595	0.194792
	GOTERM_BP_FAT	GO:2001295~malonyl-CoA biosynthetic process	2	1.9802	0.00947295	ACACB, ACACA	96	2	20010	208.437	1	0.215133	0.207874
	GOTERM_BP_FAT	GO:0009117~nucleotide metabolic process	9	8.91089	0.0112357	ADCY10, GDA, PPCS, MPC1, ENTPD5, ME1, MT-CO2, ME2, ENO1	96	641	20010	2.92658	1	0.252804	0.244273
	GOTERM_BP_FAT	GO:0009895~negative regulation of catabolic process	6	5.94059	0.0117476	ZKSCAN3, CIDEA, LEPR, ACACB, SORL1, CYP51	96	286	20010	4.37281	1	0.261895	0.253058
	GOTERM_BP_FAT	GO:0006753~nucleoside phosphate metabolic process	9	8.91089	0.0119372	ADCY10, GDA, PPCS, MPC1, ENTPD5, ME1, MT-CO2, ME2, ENO1	96	648	20010	2.89497	1	0.263705	0.254806
	GOTERM_BP_FAT	GO:0009725~response to hormone	11	10.8911	0.0123374	INSIG1, CASP3, NCOA4, ME1, LEPR, ATP1A3, MYO5A, SORL1, SH2B2, ACACA, CYP51	96	925	20010	2.47872	1	0.27009	0.260976
	GOTERM_BP_FAT	GO:0019730~antimicrobial humoral response	5	4.9505	0.0130528	IGHG1, IGHG2C, CXCL13, S100A9, CAMP	96	191	20010	5.45648	1	0.283199	0.273642
	GOTERM_BP_FAT	GO:1901615~organic hydroxy compound metabolic process	8	7.92079	0.0137526	IDI1, RDH11, INSIG1, LEPR, MYO5A, MSMO1, MVD, CYP51	96	535	20010	3.11682	1	0.295742	0.285762
	GOTERM_BP_FAT	GO:0019216~regulation of lipid metabolic process	7	6.93069	0.0143522	FABP5, INSIG1, CIDEA, THRSP, ACACB, SORL1, PDK1	96	416	20010	3.50736	1	0.302058	0.291866
	GOTERM_BP_FAT	GO:0019217~regulation of fatty acid metabolic process	4	3.9604	0.0144193	FABP5, INSIG1, ACACB, PDK1	96	107	20010	7.79206	1	0.302058	0.291866
	GOTERM_BP_FAT	GO:0006641~triglyceride metabolic process	4	3.9604	0.0144193	INSIG1, LIPG, THRSP, SORL1	96	107	20010	7.79206	1	0.302058	0.291866
	GOTERM_BP_FAT	GO:1905952~regulation of lipid localization	5	4.9505	0.0152196	ATP8A1, LIPG, CIDEA, ACACB, ACAT2	96	200	20010	5.21094	1	0.316099	0.305433
	GOTERM_BP_FAT	GO:0090407~organophosphate biosynthetic process	8	7.92079	0.0155021	ADCY10, IDI1, FABP5, PPCS, MT-CO2, MVD, ENO1, AGPAT2	96	548	20010	3.04288	1	0.319239	0.308466
	GOTERM_BP_FAT	GO:0055086~nucleobase-containing small molecule metabolic process	9	8.91089	0.0158137	ADCY10, GDA, PPCS, MPC1, ENTPD5, ME1, MT-CO2, ME2, ENO1	96	682	20010	2.75064	1	0.322918	0.312021
	GOTERM_BP_FAT	GO:0051050~positive regulation of transport	12	11.8812	0.017007	IGHG1, ATP8A1, LIPG, LEPR, MYO5A, GLRX, LPAR3, SORL1, S100A9, S100A8, ACAT2, CD177	96	1120	20010	2.23326	1	0.344392	0.33277
	GOTERM_BP_FAT	GO:0002793~positive regulation of peptide secretion	5	4.9505	0.0176014	LEPR, GLRX, SORL1, S100A9, S100A8	96	209	20010	4.98654	1	0.353482	0.341554
	GOTERM_BP_FAT	GO:0044712~single-organism catabolic process	11	10.8911	0.0181603	GDA, ENTPD5, ASPG, LIPG, CIDEA, MGST2, ENO1, MMP8, ACACB, SORL1, ACAT2	96	983	20010	2.33246	1	0.361718	0.349512
	GOTERM_BP_FAT	GO:0015918~sterol transport	4	3.9604	0.0186832	GRAMD1B, STARD5, LIPG, ACAT2	96	118	20010	7.06568	1	0.369107	0.356651
	GOTERM_BP_FAT	GO:0070488~neutrophil aggregation	2	1.9802	0.0188571	S100A9, S100A8	96	4	20010	104.219	1	0.369538	0.357068
	GOTERM_BP_FAT	GO:0042592~homeostatic process	18	17.8218	0.0197311	GRAMD1B, INSIG1, NCOA4, CHD7, CIDEA, ATP1A3, MYO5A, LPAR3, CXCL13, ACACB, ACACA, RECQL4, RASSF2, FABP5, CASP3, LIPG, LEPR, SH2B2	96	2103	20010	1.78406	1	0.383573	0.37063
	GOTERM_BP_FAT	GO:0045833~negative regulation of lipid metabolic process	4	3.9604	0.0199546	INSIG1, CIDEA, ACACB, SORL1	96	121	20010	6.8905	1	0.38484	0.371853
	GOTERM_BP_FAT	GO:0051235~maintenance of location	6	5.94059	0.0222574	INSIG1, CHD7, CIDEA, MYO5A, ACACB, SORL1	96	337	20010	3.71105	1	0.42587	0.411499
	GOTERM_BP_FAT	GO:0046490~isopentenyl diphosphate metabolic process	2	1.9802	0.0235161	IDI1, MVD	96	5	20010	83.375	1	0.442978	0.42803
	GOTERM_BP_FAT	GO:0009240~isopentenyl diphosphate biosynthetic process	2	1.9802	0.0235161	IDI1, MVD	96	5	20010	83.375	1	0.442978	0.42803
	GOTERM_BP_FAT	GO:1903580~positive regulation of ATP metabolic process	3	2.9703	0.0262724	ENTPD5, MT-CO2, ENO1	96	53	20010	11.7983	1	0.491092	0.47452
	GOTERM_BP_FAT	GO:1990266~neutrophil migration	4	3.9604	0.0270134	CXCL13, S100A9, S100A8, CD177	96	136	20010	6.13051	1	0.501088	0.484178
	GOTERM_BP_FAT	GO:0044242~cellular lipid catabolic process	5	4.9505	0.0278912	LIPG, MGST2, ACACB, SORL1, ACAT2	96	241	20010	4.32443	1	0.509602	0.492405
	GOTERM_BP_FAT	GO:0048878~chemical homeostasis	13	12.8713	0.0278918	GRAMD1B, INSIG1, NCOA4, CHD7, ATP1A3, MYO5A, LPAR3, CXCL13, ACACA, FABP5, LIPG, LEPR, SH2B2	96	1365	20010	1.98512	1	0.509602	0.492405
	GOTERM_BP_FAT	GO:2001293~malonyl-CoA metabolic process	2	1.9802	0.0281533	ACACB, ACACA	96	6	20010	69.4792	1	0.510541	0.493312
	GOTERM_BP_FAT	GO:0006639~acylglycerol metabolic process	4	3.9604	0.0296258	INSIG1, LIPG, THRSP, SORL1	96	141	20010	5.91312	1	0.533264	0.515269
	GOTERM_BP_FAT	GO:0008202~steroid metabolic process	6	5.94059	0.0303271	IDI1, INSIG1, LEPR, MSMO1, MVD, CYP51	96	366	20010	3.41701	1	0.541873	0.523588
	GOTERM_BP_FAT	GO:0006638~neutral lipid metabolic process	4	3.9604	0.0307069	INSIG1, LIPG, THRSP, SORL1	96	143	20010	5.83042	1	0.544656	0.526277
	GOTERM_BP_FAT	GO:0051289~protein homotetramerization	3	2.9703	0.0310394	ME1, ACACB, ACACA	96	58	20010	10.7812	1	0.546563	0.528119
	GOTERM_BP_FAT	GO:0005975~carbohydrate metabolic process	8	7.92079	0.0326343	FABP5, ENTPD5, GBE1, LEPR, CHIL3, ENO1, ACACB, PDK1	96	640	20010	2.60547	1	0.556837	0.538047
	GOTERM_BP_FAT	GO:0019367~fatty acid elongation, saturated fatty acid	2	1.9802	0.0327686	ELOVL3, ELOVL6	96	7	20010	59.5536	1	0.556837	0.538047
	GOTERM_BP_FAT	GO:0034625~fatty acid elongation, monounsaturated fatty acid	2	1.9802	0.0327686	ELOVL3, ELOVL6	96	7	20010	59.5536	1	0.556837	0.538047
	GOTERM_BP_FAT	GO:0019368~fatty acid elongation, unsaturated fatty acid	2	1.9802	0.0327686	ELOVL3, ELOVL6	96	7	20010	59.5536	1	0.556837	0.538047
	GOTERM_BP_FAT	GO:0034626~fatty acid elongation, polyunsaturated fatty acid	2	1.9802	0.0327686	ELOVL3, ELOVL6	96	7	20010	59.5536	1	0.556837	0.538047
	GOTERM_BP_FAT	GO:0009409~response to cold	3	2.9703	0.034051	RBM3, CIDEA, MT-CO2	96	61	20010	10.251	1	0.574611	0.555221
	GOTERM_BP_FAT	GO:0046486~glycerolipid metabolic process	6	5.94059	0.0358173	FABP5, INSIG1, LIPG, THRSP, SORL1, AGPAT2	96	383	20010	3.26534	1	0.600249	0.579994
	GOTERM_BP_FAT	GO:0051046~regulation of secretion	9	8.91089	0.0386836	CHD7, LEPR, MYO5A, GLRX, SORL1, S100A9, S100A8, CYP51, CD177	96	810	20010	2.31597	1	0.643843	0.622117
	GOTERM_BP_FAT	GO:0010565~regulation of cellular ketone metabolic process	4	3.9604	0.0413582	FABP5, INSIG1, ACACB, PDK1	96	161	20010	5.17857	1	0.679336	0.656412
	GOTERM_BP_FAT	GO:0090087~regulation of peptide transport	8	7.92079	0.0415996	INSIG1, CHD7, LEPR, GLRX, SORL1, S100A9, S100A8, CYP51	96	675	20010	2.47037	1	0.679336	0.656412
	GOTERM_BP_FAT	GO:0035425~autocrine signaling	2	1.9802	0.0419343	S100A9, S100A8	96	9	20010	46.3194	1	0.679336	0.656412
	GOTERM_BP_FAT	GO:0006108~malate metabolic process	2	1.9802	0.0419343	ME1, ME2	96	9	20010	46.3194	1	0.679336	0.656412
	GOTERM_BP_FAT	GO:0097530~granulocyte migration	4	3.9604	0.044607	CXCL13, S100A9, S100A8, CD177	96	166	20010	5.02259	1	0.717848	0.693625
	GOTERM_BP_FAT	GO:0006796~phosphate-containing compound metabolic process	23	22.7723	0.046464	IDI1, GDA, ENTPD5, LPAR3, ENO1, MMP8, SORL1, AGPAT2, ADCY10, RASSF2, FABP5, PPCS, MPC1, CASP3, ASPG, LEPR, PIM1, ME1, MT-CO2, MVD, ME2, CAMP, PDK1	96	3225	20010	1.48653	1	0.733496	0.708744
	GOTERM_BP_FAT	GO:0035338~long-chain fatty-acyl-CoA biosynthetic process	2	1.9802	0.0464849	ELOVL3, ELOVL6	96	10	20010	41.6875	1	0.733496	0.708744
	GOTERM_BP_FAT	GO:1902031~regulation of NADP metabolic process	2	1.9802	0.0464849	ME1, ME2	96	10	20010	41.6875	1	0.733496	0.708744
	GOTERM_BP_FAT	GO:0033559~unsaturated fatty acid metabolic process	4	3.9604	0.0479796	FABP5, ELOVL3, MGST2, ELOVL6	96	171	20010	4.87573	1	0.752196	0.726813
	GOTERM_BP_FAT	GO:0050994~regulation of lipid catabolic process	3	2.9703	0.0494902	CIDEA, ACACB, SORL1	96	75	20010	8.3375	1	0.770905	0.744891
	GOTERM_BP_FAT	GO:0046949~fatty-acyl-CoA biosynthetic process	2	1.9802	0.0510141	ELOVL3, ELOVL6	96	11	20010	37.8977	1	0.789582	0.762937
	GOTERM_BP_FAT	GO:0006869~lipid transport	6	5.94059	0.0523121	GRAMD1B, STARD5, FABP5, ATP8A1, LIPG, ACAT2	96	426	20010	2.93574	1	0.803057	0.775958
	GOTERM_BP_FAT	GO:0015850~organic hydroxy compound transport	5	4.9505	0.0525457	GRAMD1B, STARD5, LIPG, MYO5A, ACAT2	96	296	20010	3.5209	1	0.803057	0.775958
	GOTERM_BP_FAT	GO:0032868~response to insulin	5	4.9505	0.0530768	INSIG1, MYO5A, SORL1, SH2B2, CYP51	96	297	20010	3.50905	1	0.806104	0.778902
	GOTERM_BP_FAT	GO:0033993~response to lipid	11	10.8911	0.053913	GRAMD1B, INSIG1, CASP3, PIM1, ATP1A3, GLRX, CXCL13, S100A9, ACACA, S100A8, CAMP	96	1183	20010	1.93813	1	0.813718	0.786259
	GOTERM_BP_FAT	GO:0055088~lipid homeostasis	4	3.9604	0.056569	GRAMD1B, INSIG1, LIPG, ACACA	96	183	20010	4.55601	1	0.848535	0.819901
	GOTERM_BP_FAT	GO:0051047~positive regulation of secretion	6	5.94059	0.0575936	LEPR, GLRX, SORL1, S100A9, S100A8, CD177	96	438	20010	2.85531	1	0.858604	0.82963
	GOTERM_BP_FAT	GO:0042761~very long-chain fatty acid biosynthetic process	2	1.9802	0.0600088	ELOVL3, ELOVL6	96	13	20010	32.0673	1	0.889154	0.85915
	GOTERM_BP_FAT	GO:0097193~intrinsic apoptotic signaling pathway	5	4.9505	0.0613947	CASP3, ENO1, S100A9, S100A8, PDK1	96	312	20010	3.34034	1	0.90393	0.873427
	GOTERM_BP_FAT	GO:0006914~autophagy	6	5.94059	0.06175	ZFYVE26, ZKSCAN3, LEPR, MYO5A, S100A9, S100A8	96	447	20010	2.79782	1	0.90393	0.873427
	GOTERM_BP_FAT	GO:0008654~phospholipid biosynthetic process	4	3.9604	0.0634582	IDI1, FABP5, MVD, AGPAT2	96	192	20010	4.34245	1	0.923374	0.892215
	GOTERM_BP_FAT	GO:1902510~regulation of apoptotic DNA fragmentation	2	1.9802	0.0644744	CASP3, CIDEA	96	14	20010	29.7768	1	0.927058	0.895774
	GOTERM_BP_FAT	GO:0030497~fatty acid elongation	2	1.9802	0.0644744	ELOVL3, ELOVL6	96	14	20010	29.7768	1	0.927058	0.895774
	GOTERM_BP_FAT	GO:0032870~cellular response to hormone stimulus	7	6.93069	0.0685466	INSIG1, LEPR, ATP1A3, MYO5A, SORL1, SH2B2, ACACA	96	606	20010	2.40769	1	0.979376	0.946327
	GOTERM_BP_FAT	GO:0006085~acetyl-CoA biosynthetic process	2	1.9802	0.068919	PPCS, MPC1	96	15	20010	27.7917	1	0.979376	0.946327
	GOTERM_BP_FAT	GO:0051262~protein tetramerization	3	2.9703	0.0695946	ME1, ACACB, ACACA	96	91	20010	6.87157	1	0.983226	0.950047
	GOTERM_BP_FAT	GO:1901700~response to oxygen-containing compound	16	15.8416	0.0702741	GRAMD1B, INSIG1, ATP1A3, MYO5A, GLRX, CXCL13, SORL1, ACACA, CYP51, CASP3, LEPR, PIM1, S100A9, S100A8, SH2B2, CAMP	96	2101	20010	1.58734	1	0.984884	0.951649
	GOTERM_BP_FAT	GO:1900544~positive regulation of purine nucleotide metabolic process	3	2.9703	0.0709278	ENTPD5, MT-CO2, ENO1	96	92	20010	6.79688	1	0.984884	0.951649
	GOTERM_BP_FAT	GO:0045981~positive regulation of nucleotide metabolic process	3	2.9703	0.0709278	ENTPD5, MT-CO2, ENO1	96	92	20010	6.79688	1	0.984884	0.951649
	GOTERM_BP_FAT	GO:1903624~regulation of DNA catabolic process	2	1.9802	0.0733428	CASP3, CIDEA	96	16	20010	26.0547	1	1	0.966653
	GOTERM_BP_FAT	GO:0018119~peptidyl-cysteine S-nitrosylation	2	1.9802	0.0733428	S100A9, S100A8	96	16	20010	26.0547	1	1	0.966653
	GOTERM_BP_FAT	GO:0071396~cellular response to lipid	8	7.92079	0.0747325	GRAMD1B, INSIG1, PIM1, ATP1A3, GLRX, CXCL13, ACACA, CAMP	96	773	20010	2.15718	1	1	0.966653
	GOTERM_BP_FAT	GO:0031330~negative regulation of cellular catabolic process	4	3.9604	0.0766125	ZKSCAN3, LEPR, ACACB, SORL1	96	208	20010	4.00841	1	1	0.966653
	GOTERM_BP_FAT	GO:0035336~long-chain fatty-acyl-CoA metabolic process	2	1.9802	0.0777457	ELOVL3, ELOVL6	96	17	20010	24.5221	1	1	0.966653
	GOTERM_BP_FAT	GO:0017014~protein nitrosylation	2	1.9802	0.0777457	S100A9, S100A8	96	17	20010	24.5221	1	1	0.966653
	GOTERM_BP_FAT	GO:0032370~positive regulation of lipid transport	3	2.9703	0.0804886	ATP8A1, LIPG, ACAT2	96	99	20010	6.31629	1	1	0.966653
	GOTERM_BP_FAT	GO:0042632~cholesterol homeostasis	3	2.9703	0.0818857	GRAMD1B, INSIG1, LIPG	96	100	20010	6.25312	1	1	0.966653
	GOTERM_BP_FAT	GO:2001171~positive regulation of ATP biosynthetic process	2	1.9802	0.0821279	MT-CO2, ENO1	96	18	20010	23.1597	1	1	0.966653
	GOTERM_BP_FAT	GO:0060628~regulation of ER to Golgi vesicle-mediated transport	2	1.9802	0.0821279	INSIG1, SORL1	96	18	20010	23.1597	1	1	0.966653
	GOTERM_BP_FAT	GO:0055092~sterol homeostasis	3	2.9703	0.0832904	GRAMD1B, INSIG1, LIPG	96	101	20010	6.19121	1	1	0.966653
	GOTERM_BP_FAT	GO:0006109~regulation of carbohydrate metabolic process	4	3.9604	0.0836061	ENTPD5, LEPR, ACACB, PDK1	96	216	20010	3.85995	1	1	0.966653
	GOTERM_BP_FAT	GO:1901701~cellular response to oxygen-containing compound	12	11.8812	0.0836481	GRAMD1B, INSIG1, PIM1, LEPR, ATP1A3, MYO5A, GLRX, CXCL13, SORL1, SH2B2, ACACA, CAMP	96	1455	20010	1.71907	1	1	0.966653
	GOTERM_BP_FAT	GO:0009150~purine ribonucleotide metabolic process	6	5.94059	0.085585	ADCY10, GDA, PPCS, ENTPD5, MT-CO2, ENO1	96	493	20010	2.53676	1	1	0.966653
	GOTERM_BP_FAT	GO:0070486~leukocyte aggregation	2	1.9802	0.0864896	S100A9, S100A8	96	19	20010	21.9408	1	1	0.966653
	GOTERM_BP_FAT	GO:0030593~neutrophil chemotaxis	3	2.9703	0.0889823	CXCL13, S100A9, S100A8	96	105	20010	5.95536	1	1	0.966653
	GOTERM_BP_FAT	GO:1903578~regulation of ATP metabolic process	3	2.9703	0.0889823	ENTPD5, MT-CO2, ENO1	96	105	20010	5.95536	1	1	0.966653
	GOTERM_BP_FAT	GO:0048639~positive regulation of developmental growth	4	3.9604	0.089943	CHD7, PIM1, LPAR3, ACACB	96	223	20010	3.73879	1	1	0.966653
	GOTERM_BP_FAT	GO:0006720~isoprenoid metabolic process	3	2.9703	0.0947865	IDI1, RDH11, MVD	96	109	20010	5.73681	1	1	0.966653
	GOTERM_BP_FAT	GO:0006163~purine nucleotide metabolic process	6	5.94059	0.0948723	ADCY10, GDA, PPCS, ENTPD5, MT-CO2, ENO1	96	509	20010	2.45702	1	1	0.966653
	GOTERM_BP_FAT	GO:0032869~cellular response to insulin stimulus	4	3.9604	0.0955309	INSIG1, MYO5A, SORL1, SH2B2	96	229	20010	3.64083	1	1	0.966653
	GOTERM_BP_FAT	GO:0030301~cholesterol transport	3	2.9703	0.0962544	STARD5, LIPG, ACAT2	96	110	20010	5.68466	1	1	0.966653
	GOTERM_BP_FAT	GO:0038061~NIK/NF-kappaB signaling	3	2.9703	0.0962544	RASSF2, GLRX, MMP8	96	110	20010	5.68466	1	1	0.966653
	GOTERM_BP_FAT	GO:0046903~secretion	10	9.90099	0.0970175	CHD7, LEPR, MYO5A, MT-CO2, GLRX, SORL1, S100A9, S100A8, CYP51, CD177	96	1154	20010	1.80622	1	1	0.966653
	GOTERM_BP_FAT	GO:0009259~ribonucleotide metabolic process	6	5.94059	0.0972724	ADCY10, GDA, PPCS, ENTPD5, MT-CO2, ENO1	96	513	20010	2.43787	1	1	0.966653
	GOTERM_BP_FAT	GO:0044723~single-organism carbohydrate metabolic process	6	5.94059	0.0978773	FABP5, ENTPD5, GBE1, LEPR, ENO1, PDK1	96	514	20010	2.43312	1	1	0.966653
	GOTERM_BP_FAT	GO:0006006~glucose metabolic process	4	3.9604	0.0983774	FABP5, LEPR, ENO1, PDK1	96	232	20010	3.59375	1	1	0.966653
	GOTERM_BP_FAT	GO:0055114~oxidation-reduction process	6	5.94059	0.0984841	GBE1, LEPR, MT-CO2, ENO1, ACACB, ACAT2	96	515	20010	2.4284	1	1	0.966653
	GOTERM_CC_FAT	GO:0042571~immunoglobulin complex, circulating	14	13.8614	2.70517e-11	IGHV1-82, IGHV1-50, IGHV1-52, IGHV1-11, IGHV1-22, IGHV1-26, IGHG3, IGHV11-2, IGHG2C, IGHG1, IGHA, IGHV5-9, IGLC1, IGHV3-6	90	192	16683	13.5163	7.24985e-09	7.24986e-09	7.22281e-09
	GOTERM_CC_FAT	GO:0019814~immunoglobulin complex	15	14.8515	1.1597e-10	IGHV1-82, IGHV1-50, IGHV1-52, IGHV1-11, IGHV1-22, IGLV2, IGHV1-26, IGHG3, IGHV11-2, IGHG2C, IGHG1, IGHA, IGHV5-9, IGLC1, IGHV3-6	90	264	16683	10.5322	3.108e-08	1.554e-08	1.5482e-08
	GOTERM_CC_FAT	GO:0005615~extracellular space	36	35.6436	3.77424e-10	IGHV1-82, IGKV8-16, IGHV1-22, CXCL13, IGHV1-26, IGHG3, IGHG1, IGKV10-94, IGKV9-124, LIPG, IGHV5-9, LEPR, IGLC1, IGHV3-6, CAMP, IGKV14-126, IGKV6-23, IGKV8-24, IGHV1-50, IGHV1-52, ENTPD5, IGHV1-11, IGKV13-84, IGLV2, MMP8, SORL1, IGLV1, IGHV11-2, IGHG2C, FABP5, IGHA, NGP, CHIL3, S100A9, H2-Q10, S100A8	90	2163	16683	3.08516	1.0115e-07	3.37165e-08	3.35907e-08
	GOTERM_CC_FAT	GO:0044421~extracellular region part	36	35.6436	1.65752e-08	IGHV1-82, IGKV8-16, IGHV1-22, CXCL13, IGHV1-26, IGHG3, IGHG1, IGKV10-94, IGKV9-124, LIPG, IGHV5-9, LEPR, IGLC1, IGHV3-6, CAMP, IGKV14-126, IGKV6-23, IGKV8-24, IGHV1-50, IGHV1-52, ENTPD5, IGHV1-11, IGKV13-84, IGLV2, MMP8, SORL1, IGLV1, IGHV11-2, IGHG2C, FABP5, IGHA, NGP, CHIL3, S100A9, H2-Q10, S100A8	90	2490	16683	2.68	4.44215e-06	1.11054e-06	1.1064e-06
	GOTERM_CC_FAT	GO:0005576~extracellular region	38	37.6238	3.61865e-07	IGHV1-82, IGKV8-16, ODAD4, IGHV1-22, CXCL13, IGHV1-26, IGHG3, IGHG1, IGKV10-94, IGKV9-124, LIPG, IGHV5-9, LEPR, IGLC1, IGHV3-6, CAMP, IGKV14-126, IGKV6-23, IGKV8-24, IGHV1-50, IGHV1-52, ENTPD5, IGHV1-11, IGKV13-84, IGLV2, MMP8, SORL1, IGLV1, ADCY10, IGHV11-2, IGHG2C, FABP5, IGHA, NGP, CHIL3, S100A9, H2-Q10, S100A8	90	3086	16683	2.28254	9.69752e-05	1.9396e-05	1.93236e-05
	GOTERM_CC_FAT	GO:0009897~external side of plasma membrane	16	15.8416	6.35147e-06	IGHV1-82, IGHV1-50, IGHV1-52, IGHV1-11, IGHV1-22, IGHV1-26, IGHG3, IGHV11-2, IGHG2C, IGHG1, IGHA, IGHV5-9, LEPR, IGLC1, IGHV3-6, H2-Q10	90	727	16683	4.0796	0.00170075	0.000283699	0.00028264
	GOTERM_CC_FAT	GO:0009986~cell surface	20	19.802	6.5676e-05	IGHV1-82, IGHV1-50, IGHV1-52, IGHV1-11, IGHV1-22, SEPTIN6, ENO1, IGHV1-26, SORL1, IGHG3, IGHV11-2, IGHG2C, IGHG1, IGHA, LIPG, IGHV5-9, LEPR, IGLC1, IGHV3-6, H2-Q10	90	1337	16683	2.77287	0.0174477	0.00251445	0.00250507
	GOTERM_CC_FAT	GO:0098552~side of membrane	16	15.8416	0.000133158	IGHV1-82, IGHV1-50, IGHV1-52, IGHV1-11, IGHV1-22, IGHV1-26, IGHG3, IGHV11-2, IGHG2C, IGHG1, IGHA, IGHV5-9, LEPR, IGLC1, IGHV3-6, H2-Q10	90	946	16683	3.13517	0.0350594	0.0044608	0.00444415
	GOTERM_CC_FAT	GO:0044432~endoplasmic reticulum part	13	12.8713	0.0248888	GRAMD1B, ENTPD5, INSIG1, ELOVL3, MGST2, ELOVL6, MSMO1, SORL1, AGPAT2, CYP51, RDH11, CHIL3, H2-Q10	90	1197	16683	2.01317	0.998835	0.741134	0.738368
	GOTERM_CC_FAT	GO:0042175~nuclear outer membrane-endoplasmic reticulum membrane network	12	11.8812	0.0305926	GRAMD1B, RDH11, INSIG1, ELOVL3, MGST2, ELOVL6, MSMO1, ENO1, SORL1, AGPAT2, H2-Q10, CYP51	90	1093	16683	2.03513	0.999758	0.769633	0.766762
	GOTERM_CC_FAT	GO:0071735~IgG immunoglobulin complex	2	1.9802	0.0315894	IGHG3, IGHG1	90	6	16683	61.7889	0.999816	0.769633	0.766762
	GOTERM_CC_FAT	GO:0005789~endoplasmic reticulum membrane	11	10.8911	0.0566633	GRAMD1B, RDH11, INSIG1, ELOVL3, MGST2, ELOVL6, MSMO1, SORL1, AGPAT2, H2-Q10, CYP51	90	1064	16683	1.91638	1	1	1
	GOTERM_CC_FAT	GO:0005739~mitochondrion	17	16.8317	0.05892	SLC25A1, IDI1, ACSM3, RMND1, NCOA4, CIDEA, GLRX, ACACB, ACACA, ACAT2, ADCY10, MPC1, FASN, ME1, MT-CO2, ME2, PDK1	90	1983	16683	1.58912	1	1	1
	GOTERM_CC_FAT	GO:0030176~integral component of endoplasmic reticulum membrane	4	3.9604	0.0617049	INSIG1, ELOVL3, ELOVL6, H2-Q10	90	169	16683	4.38738	1	1	1
	GOTERM_CC_FAT	GO:0031227~intrinsic component of endoplasmic reticulum membrane	4	3.9604	0.0688663	INSIG1, ELOVL3, ELOVL6, H2-Q10	90	177	16683	4.18908	1	1	1
	GOTERM_CC_FAT	GO:0005783~endoplasmic reticulum	16	15.8416	0.0779823	GRAMD1B, ATP8A1, ENTPD5, INSIG1, ELOVL3, ATP1A3, MGST2, MYO5A, ELOVL6, MSMO1, SORL1, AGPAT2, CYP51, RDH11, CHIL3, H2-Q10	90	1902	16683	1.55934	1	1	1
	GOTERM_CC_FAT	GO:0005769~early endosome	6	5.94059	0.0780862	ZFYVE26, PARM1, LIPG, MYO5A, SORL1, H2-Q10	90	427	16683	2.60468	1	1	1
	GOTERM_MF_FAT	GO:0034987~immunoglobulin receptor binding	14	13.8614	5.56525e-12	IGHV1-82, IGHV1-50, IGHV1-52, IGHV1-11, IGHV1-22, IGHV1-26, IGHG3, IGHV11-2, IGHG2C, IGHG1, IGHA, IGHV5-9, IGLC1, IGHV3-6	84	197	18079	15.2953	2.7993e-09	2.79932e-09	2.77149e-09
	GOTERM_MF_FAT	GO:0003823~antigen binding	15	14.8515	1.09124e-10	IGHV1-82, IGHV1-50, IGHV1-52, IGHV1-11, IGHV1-22, IGHV1-26, IGHG3, IGHV11-2, IGHG2C, IGHG1, IGHA, IGHV5-9, IGLC1, IGHV3-6, H2-Q10	84	306	18079	10.5503	5.48893e-08	2.74446e-08	2.71718e-08
	GOTERM_MF_FAT	GO:0005102~receptor binding	21	20.7921	0.000486333	IGHV1-82, IGHV1-50, IGHV1-52, IGHV1-11, IGHV1-22, ATP1A3, CXCL13, IGHV1-26, IGHG3, IGHV11-2, IGHG2C, IGHG1, IGHA, CASP3, IGHV5-9, IGLC1, IGHV3-6, S100A8, SH2B2, H2-Q10, CD177	84	1973	18079	2.2908	0.217049	0.079624	0.0788325
	GOTERM_MF_FAT	GO:0016747~transferase activity, transferring acyl groups other than amino-acyl groups	7	6.93069	0.000633193	ACSM3, FASN, ASPG, ELOVL3, ELOVL6, AGPAT2, ACAT2	84	228	18079	6.60782	0.272831	0.079624	0.0788325
	GOTERM_MF_FAT	GO:0033293~monocarboxylic acid binding	5	4.9505	0.00107498	STARD5, FABP5, ACACB, ACACA, S100A8	84	98	18079	10.9809	0.417837	0.0958535	0.0949007
	GOTERM_MF_FAT	GO:0016746~transferase activity, transferring acyl groups	7	6.93069	0.00132555	ACSM3, FASN, ASPG, ELOVL3, ELOVL6, AGPAT2, ACAT2	84	263	18079	5.72845	0.486855	0.0958535	0.0949007
	GOTERM_MF_FAT	GO:0004312~fatty acid synthase activity	3	2.9703	0.00133394	FASN, ELOVL3, ELOVL6	84	12	18079	53.8065	0.489019	0.0958535	0.0949007
	GOTERM_MF_FAT	GO:0043168~anion binding	26	25.7426	0.00153349	GRAMD1B, ATP8A1, ACSM3, CHD7, ATP1A3, MGST2, LPAR3, CXCL13, ACACB, ACACA, RECQL4, ZFYVE26, PPCS, LIPG, PIM1, PDK1, STARD5, ENTPD5, SEPTIN6, MYO5A, ADAP1, ADCY10, FABP5, FASN, MVD, S100A8	84	2996	18079	1.86778	0.537882	0.096418	0.0954595
	GOTERM_MF_FAT	GO:0033218~amide binding	8	7.92079	0.00337911	FASN, LEPR, MGST2, ATP1A3, ACACB, SORL1, ACACA, H2-Q10	84	425	18079	4.05132	0.817785	0.174391	0.172658
	GOTERM_MF_FAT	GO:0030145~manganese ion binding	4	3.9604	0.00346702	ADCY10, IDI1, PIM1, ME1	84	66	18079	13.044	0.825694	0.174391	0.172658
	GOTERM_MF_FAT	GO:0036094~small molecule binding	22	21.7822	0.00848508	GRAMD1B, STARD5, ATP8A1, ACSM3, ENTPD5, CHD7, ATP1A3, SEPTIN6, MYO5A, ACACB, ACACA, RECQL4, ADCY10, FABP5, PPCS, FASN, PIM1, ME1, MVD, ME2, S100A8, PDK1	84	2681	18079	1.76612	0.986243	0.362968	0.35936
	GOTERM_MF_FAT	GO:0048306~calcium-dependent protein binding	4	3.9604	0.0098118	MYO5A, S100A9, S100A8, CD177	84	96	18079	8.96776	0.992985	0.362968	0.35936
	GOTERM_MF_FAT	GO:0016209~antioxidant activity	4	3.9604	0.0098118	MGST2, GLRX, S100A9, S100A8	84	96	18079	8.96776	0.992985	0.362968	0.35936
	GOTERM_MF_FAT	GO:1901681~sulfur compound binding	6	5.94059	0.0112287	LIPG, MGST2, ATP1A3, CXCL13, ACACB, ACACA	84	293	18079	4.40736	0.996586	0.362968	0.35936
	GOTERM_MF_FAT	GO:0016831~carboxy-lyase activity	3	2.9703	0.0124976	ME1, MVD, ME2	84	37	18079	17.4508	0.998211	0.362968	0.35936
	GOTERM_MF_FAT	GO:0004471~malate dehydrogenase (decarboxylating) (NAD+) activity	2	1.9802	0.0137105	ME1, ME2	84	3	18079	143.484	0.999036	0.362968	0.35936
	GOTERM_MF_FAT	GO:0004470~malic enzyme activity	2	1.9802	0.0137105	ME1, ME2	84	3	18079	143.484	0.999036	0.362968	0.35936
	GOTERM_MF_FAT	GO:0004473~malate dehydrogenase (decarboxylating) (NADP+) activity	2	1.9802	0.0137105	ME1, ME2	84	3	18079	143.484	0.999036	0.362968	0.35936
	GOTERM_MF_FAT	GO:0003989~acetyl-CoA carboxylase activity	2	1.9802	0.0137105	ACACB, ACACA	84	3	18079	143.484	0.999036	0.362968	0.35936
	GOTERM_MF_FAT	GO:0097367~carbohydrate derivative binding	19	18.8119	0.018175	ATP8A1, ACSM3, ENTPD5, CHD7, ATP1A3, SEPTIN6, MYO5A, CXCL13, ACACB, ACACA, RECQL4, ADCY10, PPCS, LIPG, PIM1, CHIL3, MVD, CAMP, PDK1	84	2341	18079	1.74682	0.999902	0.398661	0.394698
	GOTERM_MF_FAT	GO:0009374~biotin binding	2	1.9802	0.0182393	ACACB, ACACA	84	4	18079	107.613	0.999905	0.398661	0.394698
	GOTERM_MF_FAT	GO:0008948~oxaloacetate decarboxylase activity	2	1.9802	0.0182393	ME1, ME2	84	4	18079	107.613	0.999905	0.398661	0.394698
	GOTERM_MF_FAT	GO:0005524~ATP binding	14	13.8614	0.0216535	ATP8A1, ACSM3, ENTPD5, CHD7, ATP1A3, MYO5A, ACACB, ACACA, RECQL4, ADCY10, PPCS, PIM1, MVD, PDK1	84	1529	18079	1.97068	0.999983	0.398661	0.394698
	GOTERM_MF_FAT	GO:0000287~magnesium ion binding	5	4.9505	0.0223849	ADCY10, IDI1, ATP8A1, ME1, ENO1	84	233	18079	4.61859	0.999989	0.398661	0.394698
	GOTERM_MF_FAT	GO:0031406~carboxylic acid binding	5	4.9505	0.0226967	STARD5, FABP5, ACACB, ACACA, S100A8	84	234	18079	4.59885	0.99999	0.398661	0.394698
	GOTERM_MF_FAT	GO:0042802~identical protein binding	19	18.8119	0.0257009	CIDEA, MGST2, MYO5A, ENO1, ACACB, ACACA, ALS2CL, FABP5, PPCS, FASN, ZKSCAN3, LEPR, MLX, ME1, THRSP, MVD, SH2B2, H2-Q10, PDK1	84	2431	18079	1.68215	0.999998	0.398661	0.394698
	GOTERM_MF_FAT	GO:0016830~carbon-carbon lyase activity	3	2.9703	0.0264264	ME1, MVD, ME2	84	55	18079	11.7396	0.999999	0.398661	0.394698
	GOTERM_MF_FAT	GO:0032559~adenyl ribonucleotide binding	14	13.8614	0.0266142	ATP8A1, ACSM3, ENTPD5, CHD7, ATP1A3, MYO5A, ACACB, ACACA, RECQL4, ADCY10, PPCS, PIM1, MVD, PDK1	84	1573	18079	1.91555	0.999999	0.398661	0.394698
	GOTERM_MF_FAT	GO:0016421~CoA carboxylase activity	2	1.9802	0.0272353	ACACB, ACACA	84	6	18079	71.7421	0.999999	0.398661	0.394698
	GOTERM_MF_FAT	GO:0043177~organic acid binding	5	4.9505	0.0273425	STARD5, FABP5, ACACB, ACACA, S100A8	84	248	18079	4.33924	0.999999	0.398661	0.394698
	GOTERM_MF_FAT	GO:0030554~adenyl nucleotide binding	14	13.8614	0.0283576	ATP8A1, ACSM3, ENTPD5, CHD7, ATP1A3, MYO5A, ACACB, ACACA, RECQL4, ADCY10, PPCS, PIM1, MVD, PDK1	84	1587	18079	1.89866	0.999999	0.398661	0.394698
	GOTERM_MF_FAT	GO:0046914~transition metal ion binding	11	10.8911	0.029276	RECQL4, ADCY10, IDI1, GDA, PIM1, ME1, MSMO1, MT-CO2, MMP8, S100A8, CYP51	84	1103	18079	2.14641	1	0.398661	0.394698
	GOTERM_MF_FAT	GO:0032934~sterol binding	3	2.9703	0.0300927	GRAMD1B, STARD5, INSIG1	84	59	18079	10.9437	1	0.398661	0.394698
	GOTERM_MF_FAT	GO:0102336~3-oxo-arachidoyl-CoA synthase activity	2	1.9802	0.0317027	ELOVL3, ELOVL6	84	7	18079	61.4932	1	0.398661	0.394698
	GOTERM_MF_FAT	GO:0016615~malate dehydrogenase activity	2	1.9802	0.0317027	ME1, ME2	84	7	18079	61.4932	1	0.398661	0.394698
	GOTERM_MF_FAT	GO:0009922~fatty acid elongase activity	2	1.9802	0.0317027	ELOVL3, ELOVL6	84	7	18079	61.4932	1	0.398661	0.394698
	GOTERM_MF_FAT	GO:0102337~3-oxo-cerotoyl-CoA synthase activity	2	1.9802	0.0317027	ELOVL3, ELOVL6	84	7	18079	61.4932	1	0.398661	0.394698
	GOTERM_MF_FAT	GO:0016885~ligase activity, forming carbon-carbon bonds	2	1.9802	0.0317027	ACACB, ACACA	84	7	18079	61.4932	1	0.398661	0.394698
	GOTERM_MF_FAT	GO:0034988~Fc-gamma receptor I complex binding	2	1.9802	0.0317027	IGHG3, IGHG1	84	7	18079	61.4932	1	0.398661	0.394698
	GOTERM_MF_FAT	GO:0102338~3-oxo-lignoceronyl-CoA synthase activity	2	1.9802	0.0317027	ELOVL3, ELOVL6	84	7	18079	61.4932	1	0.398661	0.394698
	GOTERM_MF_FAT	GO:0016616~oxidoreductase activity, acting on the CH-OH group of donors, NAD or NADP as acceptor	4	3.9604	0.0356429	RDH11, FASN, ME1, ME2	84	157	18079	5.48347	1	0.437278	0.432931
	GOTERM_MF_FAT	GO:0016874~ligase activity	4	3.9604	0.0367934	ACSM3, PPCS, ACACB, ACACA	84	159	18079	5.4145	1	0.440645	0.436265
	GOTERM_MF_FAT	GO:0016614~oxidoreductase activity, acting on CH-OH group of donors	4	3.9604	0.0428293	RDH11, FASN, ME1, ME2	84	169	18079	5.09411	1	0.501003	0.496023
	GOTERM_MF_FAT	GO:0000166~nucleotide binding	17	16.8317	0.0449806	ATP8A1, ACSM3, ENTPD5, CHD7, ATP1A3, SEPTIN6, MYO5A, ACACB, ACACA, RECQL4, ADCY10, PPCS, PIM1, ME1, MVD, ME2, PDK1	84	2228	18079	1.64221	1	0.502035	0.497044
	GOTERM_MF_FAT	GO:1901265~nucleoside phosphate binding	17	16.8317	0.0449806	ATP8A1, ACSM3, ENTPD5, CHD7, ATP1A3, SEPTIN6, MYO5A, ACACB, ACACA, RECQL4, ADCY10, PPCS, PIM1, ME1, MVD, ME2, PDK1	84	2228	18079	1.64221	1	0.502035	0.497044
	GOTERM_MF_FAT	GO:0008289~lipid binding	9	8.91089	0.0475941	GRAMD1B, ZFYVE26, STARD5, FABP5, INSIG1, LPAR3, ADAP1, S100A8, CAMP	84	876	18079	2.21123	1	0.502035	0.497044
	GOTERM_MF_FAT	GO:0035639~purine ribonucleoside triphosphate binding	15	14.8515	0.0478943	ATP8A1, ACSM3, ENTPD5, CHD7, ATP1A3, SEPTIN6, MYO5A, ACACB, ACACA, RECQL4, ADCY10, PPCS, PIM1, MVD, PDK1	84	1888	18079	1.70995	1	0.502035	0.497044
	GOTERM_MF_FAT	GO:0043167~ion binding	38	37.6238	0.0479079	IDI1, GRAMD1B, ATP8A1, ACSM3, GDA, GBE1, CHD7, ATP1A3, MGST2, MSMO1, LPAR3, ENO1, CXCL13, ACACB, ACACA, RECQL4, ZFYVE26, PPCS, LIPG, PIM1, ME1, ZKSCAN3, ME2, PDK1, STARD5, ENTPD5, SEPTIN6, MYO5A, ADAP1, MMP8, CYP51, ADCY10, FABP5, FASN, MVD, MT-CO2, S100A9, S100A8	84	6360	18079	1.28594	1	0.502035	0.497044
	GOTERM_MF_FAT	GO:0032555~purine ribonucleotide binding	15	14.8515	0.0581804	ATP8A1, ACSM3, ENTPD5, CHD7, ATP1A3, SEPTIN6, MYO5A, ACACB, ACACA, RECQL4, ADCY10, PPCS, PIM1, MVD, PDK1	84	1942	18079	1.66241	1	0.59724	0.591303
	GOTERM_MF_FAT	GO:0017076~purine nucleotide binding	15	14.8515	0.0612907	ATP8A1, ACSM3, ENTPD5, CHD7, ATP1A3, SEPTIN6, MYO5A, ACACB, ACACA, RECQL4, ADCY10, PPCS, PIM1, MVD, PDK1	84	1957	18079	1.64966	1	0.612862	0.60677
	GOTERM_MF_FAT	GO:0032553~ribonucleotide binding	15	14.8515	0.0621391	ATP8A1, ACSM3, ENTPD5, CHD7, ATP1A3, SEPTIN6, MYO5A, ACACB, ACACA, RECQL4, ADCY10, PPCS, PIM1, MVD, PDK1	84	1961	18079	1.6463	1	0.612862	0.60677
	GOTERM_MF_FAT	GO:0072341~modified amino acid binding	3	2.9703	0.0923128	GRAMD1B, FASN, MGST2	84	111	18079	5.81692	1	0.892949	0.884072
	GOTERM_MF_FAT	GO:0016408~C-acyltransferase activity	2	1.9802	0.0963315	ACSM3, ACAT2	84	22	18079	19.566	1	0.914241	0.905153
	GOTERM_MF_FAT	GO:0042277~peptide binding	5	4.9505	0.0988564	LEPR, MGST2, ATP1A3, SORL1, H2-Q10	84	382	18079	2.8171	1	0.920829	0.911675
	KEGG_PATHWAY	mmu01100:Metabolic pathways	23	22.7723	7.9035e-07	IDI1, ACSM3, GDA, GBE1, ENTPD5, ELOVL3, MGST2, ELOVL6, MSMO1, ENO1, ACACB, AGPAT2, ACACA, ACAT2, CYP51, ADCY10, RDH11, PPCS, FASN, LIPG, ME1, MT-CO2, MVD	44	1620	8992	2.90146	0.000110643	0.000111439	0.000109859
	KEGG_PATHWAY	mmu00620:Pyruvate metabolism	5	4.9505	5.35582e-05	ME1, ME2, ACACB, ACACA, ACAT2	44	44	8992	23.2231	0.00747031	0.00377585	0.0037223
	KEGG_PATHWAY	mmu01212:Fatty acid metabolism	5	4.9505	0.00020677	FASN, ELOVL3, ELOVL6, ACACA, ACAT2	44	62	8992	16.4809	0.0285357	0.0097182	0.00958035
	KEGG_PATHWAY	mmu00061:Fatty acid biosynthesis	3	2.9703	0.00362762	FASN, ACACB, ACACA	44	19	8992	32.2679	0.398778	0.127874	0.12606
	KEGG_PATHWAY	mmu00900:Terpenoid backbone biosynthesis	3	2.9703	0.00530257	IDI1, MVD, ACAT2	44	23	8992	26.6561	0.52495	0.149532	0.147411
	KEGG_PATHWAY	mmu01200:Carbon metabolism	4	3.9604	0.0198413	ME1, ME2, ENO1, ACAT2	44	121	8992	6.75582	0.939536	0.444376	0.438072
	KEGG_PATHWAY	mmu04152:AMPK signaling pathway	4	3.9604	0.0220612	FASN, LEPR, ACACB, ACACA	44	126	8992	6.48773	0.955982	0.444376	0.438072
	KEGG_PATHWAY	mmu04910:Insulin signaling pathway	4	3.9604	0.0284469	FASN, ACACB, SH2B2, ACACA	44	139	8992	5.88097	0.982408	0.462291	0.455734
	KEGG_PATHWAY	mmu04936:Alcoholic liver disease	4	3.9604	0.0295079	FASN, CASP3, ACACB, ACACA	44	141	8992	5.79755	0.984903	0.462291	0.455734
	KEGG_PATHWAY	mmu04932:Non-alcoholic fatty liver disease	4	3.9604	0.0381294	CASP3, MLX, LEPR, MT-CO2	44	156	8992	5.24009	0.995672	0.537624	0.529998
	KEGG_PATHWAY	mmu04657:IL-17 signaling pathway	3	2.9703	0.0727154	CASP3, S100A9, S100A8	44	93	8992	6.59238	0.999974	0.932079	0.918858
	KEGG_PATHWAY	mmu00100:Steroid biosynthesis	2	1.9802	0.0915102	MSMO1, CYP51	44	20	8992	20.4364	0.999999	1	0.992857
AS vs CS down and AV vs CV up (Quadrant 2 )	GOTERM_BP_FAT	GO:0051129~negative regulation of cellular component organization	7	21.2121	0.00176573	TMOD1, PINK1, PACSIN3, PMEPA1, APOD, NUPR1, RGMA	31	886	20010	5.09976	0.940218	0.771925	0.771925
	GOTERM_BP_FAT	GO:0031331~positive regulation of cellular catabolic process	5	15.1515	0.00301419	PINK1, ORMDL3, PACSIN3, NUPR1, RGMA	31	406	20010	7.94931	0.991867	0.771925	0.771925
	GOTERM_BP_FAT	GO:0010665~regulation of cardiac muscle cell apoptotic process	3	9.09091	0.00376389	ACOT1, NUPR1, FBXO32	31	61	20010	31.7451	0.997548	0.771925	0.771925
	GOTERM_BP_FAT	GO:0010662~regulation of striated muscle cell apoptotic process	3	9.09091	0.00413491	ACOT1, NUPR1, FBXO32	31	64	20010	30.2571	0.998646	0.771925	0.771925
	GOTERM_BP_FAT	GO:0010659~cardiac muscle cell apoptotic process	3	9.09091	0.00426221	ACOT1, NUPR1, FBXO32	31	65	20010	29.7916	0.998896	0.771925	0.771925
	GOTERM_BP_FAT	GO:0003012~muscle system process	5	15.1515	0.00438663	TMOD1, SGCA, ORMDL3, FBXO32, SCN1B	31	451	20010	7.15614	0.999095	0.771925	0.771925
	GOTERM_BP_FAT	GO:0010646~regulation of cell communication	13	39.3939	0.0046127	LAMA1, STARD10, TPD52L1, NDRG2, PRLR, RGMA, PINK1, ADGRG1, PMEPA1, APOD, NUPR1, PFKM, GLUL	31	3670	20010	2.28646	0.99937	0.771925	0.771925
	GOTERM_BP_FAT	GO:0010658~striated muscle cell apoptotic process	3	9.09091	0.00465496	ACOT1, NUPR1, FBXO32	31	68	20010	28.4772	0.999411	0.771925	0.771925
	GOTERM_BP_FAT	GO:0023051~regulation of signaling	13	39.3939	0.00487373	LAMA1, STARD10, TPD52L1, NDRG2, PRLR, RGMA, PINK1, ADGRG1, PMEPA1, APOD, NUPR1, PFKM, GLUL	31	3694	20010	2.2716	0.999585	0.771925	0.771925
	GOTERM_BP_FAT	GO:0009896~positive regulation of catabolic process	5	15.1515	0.005587	PINK1, ORMDL3, PACSIN3, NUPR1, RGMA	31	483	20010	6.68203	0.999868	0.771925	0.771925
	GOTERM_BP_FAT	GO:0044087~regulation of cellular component biogenesis	7	21.2121	0.00568189	TMOD1, PINK1, SIX4, ORMDL3, PMEPA1, APOD, NUPR1	31	1121	20010	4.03068	0.999886	0.771925	0.771925
	GOTERM_BP_FAT	GO:0061061~muscle structure development	6	18.1818	0.00581488	TMOD1, PDLIM3, SIX4, LAMA1, BHLHE41, NUPR1	31	786	20010	4.92736	0.999908	0.771925	0.771925
	GOTERM_BP_FAT	GO:0051049~regulation of transport	9	27.2727	0.0085476	CADPS2, PINK1, PACSIN3, FXYD6, APOD, MASP1, PFKM, GLUL, SCN1B	31	2035	20010	2.85472	0.999999	0.909316	0.909316
	GOTERM_BP_FAT	GO:0010647~positive regulation of cell communication	9	27.2727	0.00908021	PINK1, ADGRG1, LAMA1, STARD10, NUPR1, TPD52L1, PFKM, GLUL, PRLR	31	2056	20010	2.82556	1	0.909316	0.909316
	GOTERM_BP_FAT	GO:0023056~positive regulation of signaling	9	27.2727	0.00928965	PINK1, ADGRG1, LAMA1, STARD10, NUPR1, TPD52L1, PFKM, GLUL, PRLR	31	2064	20010	2.81461	1	0.909316	0.909316
	GOTERM_BP_FAT	GO:0010660~regulation of muscle cell apoptotic process	3	9.09091	0.0109781	ACOT1, NUPR1, FBXO32	31	106	20010	18.2684	1	0.909316	0.909316
	GOTERM_BP_FAT	GO:0051246~regulation of protein metabolic process	11	33.3333	0.0114853	GRB7, PINK1, PACSIN3, PMEPA1, APOD, MASP1, NUPR1, TPD52L1, NDRG2, PRLR, RGMA	31	3080	20010	2.3053	1	0.909316	0.909316
	GOTERM_BP_FAT	GO:0010657~muscle cell apoptotic process	3	9.09091	0.0117827	ACOT1, NUPR1, FBXO32	31	110	20010	17.6041	1	0.909316	0.909316
	GOTERM_BP_FAT	GO:0009966~regulation of signal transduction	11	33.3333	0.0118751	PINK1, ADGRG1, LAMA1, STARD10, PMEPA1, APOD, NUPR1, TPD52L1, NDRG2, PRLR, RGMA	31	3095	20010	2.29413	1	0.909316	0.909316
	GOTERM_BP_FAT	GO:0042981~regulation of apoptotic process	8	24.2424	0.0121884	PINK1, SIX4, ORMDL3, ACOT1, NUPR1, FBXO32, TPD52L1, PRLR	31	1726	20010	2.99181	1	0.909316	0.909316
	GOTERM_BP_FAT	GO:0043067~regulation of programmed cell death	8	24.2424	0.0130935	PINK1, SIX4, ORMDL3, ACOT1, NUPR1, FBXO32, TPD52L1, PRLR	31	1750	20010	2.95078	1	0.909316	0.909316
	GOTERM_BP_FAT	GO:0034504~protein localization to nucleus	4	12.1212	0.0156542	SIX4, ORMDL3, APOD, GLUL	31	354	20010	7.2936	1	0.909316	0.909316
	GOTERM_BP_FAT	GO:0032880~regulation of protein localization	6	18.1818	0.0163394	PINK1, SIX4, ORMDL3, APOD, PFKM, GLUL	31	1013	20010	3.8232	1	0.909316	0.909316
	GOTERM_BP_FAT	GO:0014870~response to muscle inactivity	2	6.06061	0.0163727	SGCA, FBXO32	31	11	20010	117.361	1	0.909316	0.909316
	GOTERM_BP_FAT	GO:0014894~response to denervation involved in regulation of muscle adaptation	2	6.06061	0.0163727	SGCA, FBXO32	31	11	20010	117.361	1	0.909316	0.909316
	GOTERM_BP_FAT	GO:0014877~response to muscle inactivity involved in regulation of muscle adaptation	2	6.06061	0.0163727	SGCA, FBXO32	31	11	20010	117.361	1	0.909316	0.909316
	GOTERM_BP_FAT	GO:1903532~positive regulation of secretion by cell	4	12.1212	0.0175967	CADPS2, PINK1, PFKM, GLUL	31	370	20010	6.9782	1	0.909316	0.909316
	GOTERM_BP_FAT	GO:1903862~positive regulation of oxidative phosphorylation	2	6.06061	0.0178483	PINK1, NUPR1	31	12	20010	107.581	1	0.909316	0.909316
	GOTERM_BP_FAT	GO:0044085~cellular component biogenesis	11	33.3333	0.0181206	TMOD1, CADPS2, GRB7, PINK1, SIX4, ORMDL3, PMEPA1, APOD, NUPR1, GLUL, PRLR	31	3295	20010	2.15488	1	0.909316	0.909316
	GOTERM_BP_FAT	GO:0006793~phosphorus metabolic process	11	33.3333	0.0186369	PINK1, LAMA1, ORMDL3, ACOT1, PMEPA1, NUPR1, TPD52L1, NDRG2, PFKM, PRLR, RGMA	31	3309	20010	2.14576	1	0.909316	0.909316
	GOTERM_BP_FAT	GO:0031329~regulation of cellular catabolic process	5	15.1515	0.0194842	PINK1, ORMDL3, PACSIN3, NUPR1, RGMA	31	697	20010	4.63044	1	0.909316	0.909316
	GOTERM_BP_FAT	GO:0043066~negative regulation of apoptotic process	6	18.1818	0.0204677	PINK1, SIX4, ORMDL3, ACOT1, NUPR1, PRLR	31	1073	20010	3.60942	1	0.909316	0.909316
	GOTERM_BP_FAT	GO:1902902~negative regulation of autophagosome assembly	2	6.06061	0.0207929	PINK1, NUPR1	31	14	20010	92.212	1	0.909316	0.909316
	GOTERM_BP_FAT	GO:0016310~phosphorylation	9	27.2727	0.0215028	PINK1, LAMA1, PMEPA1, NUPR1, TPD52L1, NDRG2, PFKM, PRLR, RGMA	31	2392	20010	2.42866	1	0.909316	0.909316
	GOTERM_BP_FAT	GO:0010941~regulation of cell death	8	24.2424	0.0215803	PINK1, SIX4, ORMDL3, ACOT1, NUPR1, FBXO32, TPD52L1, PRLR	31	1931	20010	2.6742	1	0.909316	0.909316
	GOTERM_BP_FAT	GO:0031324~negative regulation of cellular metabolic process	10	30.303	0.0219184	GRB7, PINK1, SIX4, ORMDL3, BHLHE41, PMEPA1, APOD, MASP1, NUPR1, NDRG2	31	2886	20010	2.2366	1	0.909316	0.909316
	GOTERM_BP_FAT	GO:0032268~regulation of cellular protein metabolic process	10	30.303	0.0219641	GRB7, PINK1, PACSIN3, PMEPA1, MASP1, NUPR1, TPD52L1, NDRG2, PRLR, RGMA	31	2887	20010	2.23583	1	0.909316	0.909316
	GOTERM_BP_FAT	GO:0043069~negative regulation of programmed cell death	6	18.1818	0.0220627	PINK1, SIX4, ORMDL3, ACOT1, NUPR1, PRLR	31	1094	20010	3.54013	1	0.909316	0.909316
	GOTERM_BP_FAT	GO:0014854~response to inactivity	2	6.06061	0.022262	SGCA, FBXO32	31	15	20010	86.0645	1	0.909316	0.909316
	GOTERM_BP_FAT	GO:0051044~positive regulation of membrane protein ectodomain proteolysis	2	6.06061	0.0237289	PACSIN3, RGMA	31	16	20010	80.6855	1	0.938274	0.938274
	GOTERM_BP_FAT	GO:0051050~positive regulation of transport	6	18.1818	0.0241489	CADPS2, PINK1, MASP1, PFKM, GLUL, SCN1B	31	1120	20010	3.45795	1	0.938274	0.938274
	GOTERM_BP_FAT	GO:0006915~apoptotic process	8	24.2424	0.0267509	PINK1, SIX4, ORMDL3, ACOT1, NUPR1, FBXO32, TPD52L1, PRLR	31	2017	20010	2.56017	1	0.955157	0.955157
	GOTERM_BP_FAT	GO:0046903~secretion	6	18.1818	0.0270674	CADPS2, PINK1, STARD10, PFKM, GLUL, PRLR	31	1154	20010	3.35607	1	0.955157	0.955157
	GOTERM_BP_FAT	GO:0051047~positive regulation of secretion	4	12.1212	0.0273077	CADPS2, PINK1, PFKM, GLUL	31	438	20010	5.89483	1	0.955157	0.955157
	GOTERM_BP_FAT	GO:0014874~response to stimulus involved in regulation of muscle adaptation	2	6.06061	0.0281171	SGCA, FBXO32	31	19	20010	67.9457	1	0.955157	0.955157
	GOTERM_BP_FAT	GO:0051128~regulation of cellular component organization	10	30.303	0.0281428	TMOD1, PINK1, SIX4, PACSIN3, PMEPA1, APOD, MASP1, NUPR1, SCN1B, RGMA	31	3010	20010	2.14446	1	0.955157	0.955157
	GOTERM_BP_FAT	GO:0009636~response to toxic substance	3	9.09091	0.0284794	PINK1, NUPR1, SCN1B	31	176	20010	11.0026	1	0.955157	0.955157
	GOTERM_BP_FAT	GO:0008584~male gonad development	3	9.09091	0.0290787	ADGRG1, SIX4, NUPR1	31	178	20010	10.8789	1	0.955157	0.955157
	GOTERM_BP_FAT	GO:0046546~development of primary male sexual characteristics	3	9.09091	0.0293802	ADGRG1, SIX4, NUPR1	31	179	20010	10.8182	1	0.955157	0.955157
	GOTERM_BP_FAT	GO:2001235~positive regulation of apoptotic signaling pathway	3	9.09091	0.0321505	PINK1, NUPR1, TPD52L1	31	188	20010	10.3003	1	1	1
	GOTERM_BP_FAT	GO:0051043~regulation of membrane protein ectodomain proteolysis	2	6.06061	0.0339384	PACSIN3, RGMA	31	23	20010	56.129	1	1	1
	GOTERM_BP_FAT	GO:0060548~negative regulation of cell death	6	18.1818	0.0343972	PINK1, SIX4, ORMDL3, ACOT1, NUPR1, PRLR	31	1230	20010	3.1487	1	1	1
	GOTERM_BP_FAT	GO:1900180~regulation of protein localization to nucleus	3	9.09091	0.0346966	ORMDL3, APOD, GLUL	31	196	20010	9.87986	1	1	1
	GOTERM_BP_FAT	GO:0030029~actin filament-based process	5	15.1515	0.034847	TMOD1, PDLIM3, SIX4, EPB41L1, SCN1B	31	835	20010	3.86517	1	1	1
	GOTERM_BP_FAT	GO:0012501~programmed cell death	8	24.2424	0.0358105	PINK1, SIX4, ORMDL3, ACOT1, NUPR1, FBXO32, TPD52L1, PRLR	31	2143	20010	2.40965	1	1	1
	GOTERM_BP_FAT	GO:0048589~developmental growth	5	15.1515	0.0359064	SGCA, SIX4, APOD, PRLR, RGMA	31	843	20010	3.82849	1	1	1
	GOTERM_BP_FAT	GO:0042325~regulation of phosphorylation	7	21.2121	0.0370641	PINK1, PMEPA1, NUPR1, TPD52L1, NDRG2, PRLR, RGMA	31	1693	20010	2.66886	1	1	1
	GOTERM_BP_FAT	GO:0009967~positive regulation of signal transduction	7	21.2121	0.0376211	PINK1, ADGRG1, LAMA1, STARD10, NUPR1, TPD52L1, PRLR	31	1699	20010	2.65944	1	1	1
	GOTERM_BP_FAT	GO:0007399~nervous system development	9	27.2727	0.0379098	ADGRG1, SIX4, LAMA1, ORMDL3, BHLHE41, APOD, NDRG2, SCN1B, RGMA	31	2659	20010	2.18479	1	1	1
	GOTERM_BP_FAT	GO:0031032~actomyosin structure organization	3	9.09091	0.0379866	TMOD1, SIX4, EPB41L1	31	206	20010	9.40025	1	1	1
	GOTERM_BP_FAT	GO:0046661~male sex differentiation	3	9.09091	0.0393352	ADGRG1, SIX4, NUPR1	31	210	20010	9.2212	1	1	1
	GOTERM_BP_FAT	GO:0009894~regulation of catabolic process	5	15.1515	0.0393389	PINK1, ORMDL3, PACSIN3, NUPR1, RGMA	31	868	20010	3.71823	1	1	1
	GOTERM_BP_FAT	GO:0006796~phosphate-containing compound metabolic process	10	30.303	0.0418477	PINK1, LAMA1, ORMDL3, PMEPA1, NUPR1, TPD52L1, NDRG2, PFKM, PRLR, RGMA	31	3225	20010	2.0015	1	1	1
	GOTERM_BP_FAT	GO:0009892~negative regulation of metabolic process	10	30.303	0.042361	GRB7, PINK1, SIX4, ORMDL3, BHLHE41, PMEPA1, APOD, MASP1, NUPR1, NDRG2	31	3232	20010	1.99717	1	1	1
	GOTERM_BP_FAT	GO:0061484~hematopoietic stem cell homeostasis	2	6.06061	0.0426071	CADPS2, ADGRG1	31	29	20010	44.5161	1	1	1
	GOTERM_BP_FAT	GO:0070925~organelle assembly	5	15.1515	0.0450639	TMOD1, GRB7, PINK1, SIX4, NUPR1	31	907	20010	3.55835	1	1	1
	GOTERM_BP_FAT	GO:0042692~muscle cell differentiation	4	12.1212	0.0452382	TMOD1, SIX4, LAMA1, BHLHE41	31	535	20010	4.82605	1	1	1
	GOTERM_BP_FAT	GO:0002082~regulation of oxidative phosphorylation	2	6.06061	0.0454799	PINK1, NUPR1	31	31	20010	41.6441	1	1	1
	GOTERM_BP_FAT	GO:0016242~negative regulation of macroautophagy	2	6.06061	0.0469132	PINK1, NUPR1	31	32	20010	40.3427	1	1	1
	GOTERM_BP_FAT	GO:0061564~axon development	4	12.1212	0.0469274	LAMA1, APOD, SCN1B, RGMA	31	543	20010	4.75495	1	1	1
	GOTERM_BP_FAT	GO:0045732~positive regulation of protein catabolic process	3	9.09091	0.0470718	PACSIN3, NUPR1, RGMA	31	232	20010	8.34677	1	1	1
	GOTERM_BP_FAT	GO:0006928~movement of cell or subcellular component	8	24.2424	0.0475385	GRB7, ADGRG1, SIX4, LAMA1, KIF1C, APOD, GLUL, SCN1B	31	2277	20010	2.26784	1	1	1
	GOTERM_BP_FAT	GO:0033365~protein localization to organelle	5	15.1515	0.0478589	PINK1, SIX4, ORMDL3, APOD, GLUL	31	925	20010	3.4891	1	1	1
	GOTERM_BP_FAT	GO:0048608~reproductive structure development	4	12.1212	0.0482149	ADGRG1, SIX4, NUPR1, PRLR	31	549	20010	4.70298	1	1	1
	GOTERM_BP_FAT	GO:0031099~regeneration	3	9.09091	0.0489028	SGCA, APOD, RGMA	31	237	20010	8.17068	1	1	1
	GOTERM_BP_FAT	GO:0061458~reproductive system development	4	12.1212	0.0493013	ADGRG1, SIX4, NUPR1, PRLR	31	554	20010	4.66053	1	1	1
	GOTERM_BP_FAT	GO:0048699~generation of neurons	7	21.2121	0.0506113	ADGRG1, SIX4, LAMA1, BHLHE41, APOD, SCN1B, RGMA	31	1825	20010	2.47583	1	1	1
	GOTERM_BP_FAT	GO:0008219~cell death	8	24.2424	0.052704	PINK1, SIX4, ORMDL3, ACOT1, NUPR1, FBXO32, TPD52L1, PRLR	31	2329	20010	2.21721	1	1	1
	GOTERM_BP_FAT	GO:0007166~cell surface receptor signaling pathway	9	27.2727	0.0527838	PINK1, ADGRG1, LAMA1, PMEPA1, APOD, MASP1, NDRG2, PRLR, RGMA	31	2837	20010	2.04771	1	1	1
	GOTERM_BP_FAT	GO:0010667~negative regulation of cardiac muscle cell apoptotic process	2	6.06061	0.0554693	ACOT1, NUPR1	31	38	20010	33.9728	1	1	1
	GOTERM_BP_FAT	GO:0019220~regulation of phosphate metabolic process	7	21.2121	0.0562253	PINK1, PMEPA1, NUPR1, TPD52L1, NDRG2, PRLR, RGMA	31	1873	20010	2.41238	1	1	1
	GOTERM_BP_FAT	GO:0051174~regulation of phosphorus metabolic process	7	21.2121	0.0568316	PINK1, PMEPA1, NUPR1, TPD52L1, NDRG2, PRLR, RGMA	31	1878	20010	2.40596	1	1	1
	GOTERM_BP_FAT	GO:0042127~regulation of cell proliferation	7	21.2121	0.0570753	ADGRG1, SIX4, APOD, NUPR1, NDRG2, GLUL, PRLR	31	1880	20010	2.4034	1	1	1
	GOTERM_BP_FAT	GO:0010664~negative regulation of striated muscle cell apoptotic process	2	6.06061	0.0597195	ACOT1, NUPR1	31	41	20010	31.487	1	1	1
	GOTERM_BP_FAT	GO:0051241~negative regulation of multicellular organismal process	6	18.1818	0.0603169	ADGRG1, SIX4, APOD, FBXO32, NDRG2, RGMA	31	1437	20010	2.69513	1	1	1
	GOTERM_BP_FAT	GO:0030334~regulation of cell migration	5	15.1515	0.0619925	GRB7, ADGRG1, LAMA1, APOD, GLUL	31	1008	20010	3.2018	1	1	1
	GOTERM_BP_FAT	GO:0090257~regulation of muscle system process	3	9.09091	0.0620178	SGCA, ORMDL3, FBXO32	31	271	20010	7.14558	1	1	1
	GOTERM_BP_FAT	GO:1903827~regulation of cellular protein localization	4	12.1212	0.0635203	PINK1, ORMDL3, APOD, GLUL	31	615	20010	4.19827	1	1	1
	GOTERM_BP_FAT	GO:2000785~regulation of autophagosome assembly	2	6.06061	0.0639511	PINK1, NUPR1	31	44	20010	29.3402	1	1	1
	GOTERM_BP_FAT	GO:1902116~negative regulation of organelle assembly	2	6.06061	0.0639511	PINK1, NUPR1	31	44	20010	29.3402	1	1	1
	GOTERM_BP_FAT	GO:0044057~regulation of system process	4	12.1212	0.0642647	SGCA, ORMDL3, FBXO32, SCN1B	31	618	20010	4.17789	1	1	1
	GOTERM_BP_FAT	GO:0006509~membrane protein ectodomain proteolysis	2	6.06061	0.066762	PACSIN3, RGMA	31	46	20010	28.0645	1	1	1
	GOTERM_BP_FAT	GO:0022008~neurogenesis	7	21.2121	0.0674956	ADGRG1, SIX4, LAMA1, BHLHE41, APOD, SCN1B, RGMA	31	1961	20010	2.30412	1	1	1
	GOTERM_BP_FAT	GO:0051223~regulation of protein transport	4	12.1212	0.0675381	PINK1, APOD, PFKM, GLUL	31	631	20010	4.09182	1	1	1
	GOTERM_BP_FAT	GO:0008406~gonad development	3	9.09091	0.0685642	ADGRG1, SIX4, NUPR1	31	287	20010	6.74722	1	1	1
	GOTERM_BP_FAT	GO:0043523~regulation of neuron apoptotic process	3	9.09091	0.0706558	PINK1, SIX4, NUPR1	31	292	20010	6.63168	1	1	1
	GOTERM_BP_FAT	GO:0045137~development of primary sexual characteristics	3	9.09091	0.0710766	ADGRG1, SIX4, NUPR1	31	293	20010	6.60905	1	1	1
	GOTERM_BP_FAT	GO:0022607~cellular component assembly	9	27.2727	0.0718406	TMOD1, CADPS2, GRB7, PINK1, SIX4, PMEPA1, APOD, NUPR1, PRLR	31	3021	20010	1.92299	1	1	1
	GOTERM_BP_FAT	GO:0032412~regulation of ion transmembrane transporter activity	3	9.09091	0.0727685	PINK1, FXYD6, SCN1B	31	297	20010	6.52004	1	1	1
	GOTERM_BP_FAT	GO:0006468~protein phosphorylation	7	21.2121	0.0731829	PINK1, LAMA1, PMEPA1, TPD52L1, NDRG2, PRLR, RGMA	31	2002	20010	2.25694	1	1	1
	GOTERM_BP_FAT	GO:2000145~regulation of cell motility	5	15.1515	0.0736729	GRB7, ADGRG1, LAMA1, APOD, GLUL	31	1069	20010	3.0191	1	1	1
	GOTERM_BP_FAT	GO:0031399~regulation of protein modification process	7	21.2121	0.0740386	PINK1, PMEPA1, NUPR1, TPD52L1, NDRG2, PRLR, RGMA	31	2008	20010	2.25019	1	1	1
	GOTERM_BP_FAT	GO:0046034~ATP metabolic process	3	9.09091	0.074902	PINK1, NUPR1, PFKM	31	302	20010	6.41209	1	1	1
	GOTERM_BP_FAT	GO:0070201~regulation of establishment of protein localization	4	12.1212	0.0761892	PINK1, APOD, PFKM, GLUL	31	664	20010	3.88846	1	1	1
	GOTERM_BP_FAT	GO:1903580~positive regulation of ATP metabolic process	2	6.06061	0.076536	PINK1, NUPR1	31	53	20010	24.3579	1	1	1
	GOTERM_BP_FAT	GO:0010506~regulation of autophagy	3	9.09091	0.0766234	PINK1, ORMDL3, NUPR1	31	306	20010	6.32827	1	1	1
	GOTERM_BP_FAT	GO:0022898~regulation of transmembrane transporter activity	3	9.09091	0.0774889	PINK1, FXYD6, SCN1B	31	308	20010	6.28718	1	1	1
	GOTERM_BP_FAT	GO:0001932~regulation of protein phosphorylation	6	18.1818	0.077584	PINK1, PMEPA1, TPD52L1, NDRG2, PRLR, RGMA	31	1546	20010	2.50511	1	1	1
	GOTERM_BP_FAT	GO:0090087~regulation of peptide transport	4	12.1212	0.0791795	PINK1, APOD, PFKM, GLUL	31	675	20010	3.82509	1	1	1
	GOTERM_BP_FAT	GO:0040007~growth	5	15.1515	0.0804397	SGCA, SIX4, APOD, PRLR, RGMA	31	1102	20010	2.92869	1	1	1
	GOTERM_BP_FAT	GO:0043065~positive regulation of apoptotic process	4	12.1212	0.0808325	PINK1, NUPR1, FBXO32, TPD52L1	31	681	20010	3.79139	1	1	1
	GOTERM_BP_FAT	GO:0051402~neuron apoptotic process	3	9.09091	0.0809824	PINK1, SIX4, NUPR1	31	316	20010	6.12801	1	1	1
	GOTERM_BP_FAT	GO:0043623~cellular protein complex assembly	4	12.1212	0.081387	TMOD1, CADPS2, PMEPA1, PRLR	31	683	20010	3.78029	1	1	1
	GOTERM_BP_FAT	GO:0031103~axon regeneration	2	6.06061	0.0820766	APOD, RGMA	31	57	20010	22.6486	1	1	1
	GOTERM_BP_FAT	GO:0043068~positive regulation of programmed cell death	4	12.1212	0.0822218	PINK1, NUPR1, FBXO32, TPD52L1	31	686	20010	3.76375	1	1	1
	GOTERM_BP_FAT	GO:0032409~regulation of transporter activity	3	9.09091	0.083191	PINK1, FXYD6, SCN1B	31	321	20010	6.03256	1	1	1
	GOTERM_BP_FAT	GO:0040011~locomotion	7	21.2121	0.0833836	GRB7, ADGRG1, SIX4, LAMA1, APOD, GLUL, SCN1B	31	2071	20010	2.18174	1	1	1
	GOTERM_BP_FAT	GO:0006936~muscle contraction	3	9.09091	0.0845251	TMOD1, ORMDL3, SCN1B	31	324	20010	5.9767	1	1	1
	GOTERM_BP_FAT	GO:0033619~membrane protein proteolysis	2	6.06061	0.0848349	PACSIN3, RGMA	31	59	20010	21.8808	1	1	1
	GOTERM_BP_FAT	GO:2000649~regulation of sodium ion transmembrane transporter activity	2	6.06061	0.086211	FXYD6, SCN1B	31	60	20010	21.5161	1	1	1
	GOTERM_BP_FAT	GO:0009205~purine ribonucleoside triphosphate metabolic process	3	9.09091	0.0881154	PINK1, NUPR1, PFKM	31	332	20010	5.83269	1	1	1
	GOTERM_BP_FAT	GO:1902533~positive regulation of intracellular signal transduction	5	15.1515	0.0888339	PINK1, ADGRG1, NUPR1, TPD52L1, PRLR	31	1141	20010	2.82859	1	1	1
	GOTERM_BP_FAT	GO:0033554~cellular response to stress	7	21.2121	0.0888594	CADPS2, PINK1, APOD, NUPR1, TPD52L1, GLUL, RGMA	31	2106	20010	2.14548	1	1	1
	GOTERM_BP_FAT	GO:0051960~regulation of nervous system development	5	15.1515	0.0890547	ADGRG1, SIX4, BHLHE41, SCN1B, RGMA	31	1142	20010	2.82611	1	1	1
	GOTERM_BP_FAT	GO:0009167~purine ribonucleoside monophosphate metabolic process	3	9.09091	0.0903828	PINK1, NUPR1, PFKM	31	337	20010	5.74615	1	1	1
	GOTERM_BP_FAT	GO:0009126~purine nucleoside monophosphate metabolic process	3	9.09091	0.0908385	PINK1, NUPR1, PFKM	31	338	20010	5.72915	1	1	1
	GOTERM_BP_FAT	GO:0009144~purine nucleoside triphosphate metabolic process	3	9.09091	0.0908385	PINK1, NUPR1, PFKM	31	338	20010	5.72915	1	1	1
	GOTERM_BP_FAT	GO:1903530~regulation of secretion by cell	4	12.1212	0.0910695	CADPS2, PINK1, PFKM, GLUL	31	717	20010	3.60103	1	1	1
	GOTERM_BP_FAT	GO:0042327~positive regulation of phosphorylation	5	15.1515	0.091278	PINK1, NUPR1, TPD52L1, PRLR, RGMA	31	1152	20010	2.80158	1	1	1
	GOTERM_BP_FAT	GO:0009199~ribonucleoside triphosphate metabolic process	3	9.09091	0.0917518	PINK1, NUPR1, PFKM	31	340	20010	5.69545	1	1	1
	GOTERM_BP_FAT	GO:0040012~regulation of locomotion	5	15.1515	0.0919504	GRB7, ADGRG1, LAMA1, APOD, GLUL	31	1155	20010	2.7943	1	1	1
	GOTERM_BP_FAT	GO:0030036~actin cytoskeleton organization	4	12.1212	0.0925336	TMOD1, PDLIM3, SIX4, EPB41L1	31	722	20010	3.57609	1	1	1
	GOTERM_BP_FAT	GO:0051270~regulation of cellular component movement	5	15.1515	0.0933025	GRB7, ADGRG1, LAMA1, APOD, GLUL	31	1161	20010	2.77986	1	1	1
	GOTERM_BP_FAT	GO:0010656~negative regulation of muscle cell apoptotic process	2	6.06061	0.095788	ACOT1, NUPR1	31	67	20010	19.2682	1	1	1
	GOTERM_BP_FAT	GO:0044088~regulation of vacuole organization	2	6.06061	0.095788	PINK1, NUPR1	31	67	20010	19.2682	1	1	1
	GOTERM_BP_FAT	GO:0051146~striated muscle cell differentiation	3	9.09091	0.0958958	TMOD1, SIX4, BHLHE41	31	349	20010	5.54857	1	1	1
	GOTERM_BP_FAT	GO:0034622~cellular macromolecular complex assembly	5	15.1515	0.0969561	TMOD1, CADPS2, GRB7, PMEPA1, PRLR	31	1177	20010	2.74207	1	1	1
	GOTERM_BP_FAT	GO:0048584~positive regulation of response to stimulus	8	24.2424	0.0984388	PINK1, ADGRG1, LAMA1, STARD10, MASP1, NUPR1, TPD52L1, PRLR	31	2689	20010	1.92037	1	1	1
	GOTERM_BP_FAT	GO:0009161~ribonucleoside monophosphate metabolic process	3	9.09091	0.0986887	PINK1, NUPR1, PFKM	31	355	20010	5.45479	1	1	1
	GOTERM_BP_FAT	GO:0008283~cell proliferation	7	21.2121	0.0993941	ADGRG1, SIX4, APOD, NUPR1, NDRG2, GLUL, PRLR	31	2170	20010	2.08221	1	1	1
	GOTERM_BP_FAT	GO:0048468~cell development	8	24.2424	0.0996569	TMOD1, ADGRG1, SIX4, LAMA1, BHLHE41, APOD, SCN1B, RGMA	31	2697	20010	1.91467	1	1	1
	GOTERM_BP_FAT	GO:0080134~regulation of response to stress	6	18.1818	0.0998602	PINK1, APOD, MASP1, NUPR1, TPD52L1, RGMA	31	1668	20010	2.32188	1	1	1
	GOTERM_CC_FAT	GO:0097386~glial cell projection	3	9.09091	0.00269641	PINK1, ADGRG1, GLUL	31	43	16683	37.5461	0.404534	0.517711	0.517711
	GOTERM_CC_FAT	GO:0016012~sarcoglycan complex	2	6.06061	0.0107426	SGCA, SGCG	31	6	16683	179.387	0.874286	0.801421	0.801421
	GOTERM_CC_FAT	GO:0016011~dystroglycan complex	2	6.06061	0.0125222	SGCA, SGCG	31	7	16683	153.76	0.911029	0.801421	0.801421
	GOTERM_CC_FAT	GO:0030054~cell junction	7	21.2121	0.0249801	CADPS2, GRB7, PDLIM3, SGCA, LAMA1, STARD10, SCN1B	31	1288	16683	2.92479	0.992227	0.916009	0.916009
	GOTERM_CC_FAT	GO:0097458~neuron part	9	27.2727	0.029258	CADPS2, PINK1, KIF1C, FXYD6, APOD, NDRG2, GLUL, SCN1B, RGMA	31	2111	16683	2.29439	0.996659	0.916009	0.916009
	GOTERM_CC_FAT	GO:0016010~dystrophin-associated glycoprotein complex	2	6.06061	0.0353767	SGCA, SGCG	31	20	16683	53.8161	0.999008	0.916009	0.916009
	GOTERM_CC_FAT	GO:0097449~astrocyte projection	2	6.06061	0.0388471	PINK1, ADGRG1	31	22	16683	48.9238	0.999503	0.916009	0.916009
	GOTERM_CC_FAT	GO:0042383~sarcolemma	3	9.09091	0.0409183	SGCA, SGCG, SCN1B	31	179	16683	9.01946	0.999672	0.916009	0.916009
	GOTERM_CC_FAT	GO:0090665~glycoprotein complex	2	6.06061	0.0440301	SGCA, SGCG	31	25	16683	43.0529	0.999824	0.916009	0.916009
	GOTERM_CC_FAT	GO:0005911~cell-cell junction	4	12.1212	0.0506238	SGCA, LAMA1, STARD10, SCN1B	31	467	16683	4.60952	0.999953	0.916009	0.916009
	GOTERM_CC_FAT	GO:0043005~neuron projection	7	21.2121	0.0599576	PINK1, KIF1C, APOD, NDRG2, GLUL, SCN1B, RGMA	31	1587	16683	2.37374	0.999993	0.916009	0.916009
	GOTERM_CC_FAT	GO:0048471~perinuclear region of cytoplasm	5	15.1515	0.0618763	PINK1, APOD, NUPR1, TPD52L1, NDRG2	31	840	16683	3.20334	0.999995	0.916009	0.916009
	GOTERM_CC_FAT	GO:0030017~sarcomere	3	9.09091	0.0620214	TMOD1, PDLIM3, FBXO32	31	226	16683	7.14373	0.999995	0.916009	0.916009
	GOTERM_CC_FAT	GO:0044449~contractile fiber part	3	9.09091	0.0674042	TMOD1, PDLIM3, FBXO32	31	237	16683	6.81217	0.999998	0.9244	0.9244
	GOTERM_CC_FAT	GO:0030016~myofibril	3	9.09091	0.0729386	TMOD1, PDLIM3, FBXO32	31	248	16683	6.51002	1	0.93089	0.93089
	GOTERM_CC_FAT	GO:0043292~contractile fiber	3	9.09091	0.0775742	TMOD1, PDLIM3, FBXO32	31	257	16683	6.28204	1	0.93089	0.93089
	GOTERM_MF_FAT	GO:0008289~lipid binding	7	21.2121	0.00127124	CADPS2, GRB7, LAMA1, SEC14L4, STARD10, PACSIN3, APOD	27	876	18079	5.35063	0.229542	0.260604	0.260604
	GOTERM_MF_FAT	GO:0099106~ion channel regulator activity	3	9.09091	0.0119963	PACSIN3, FXYD6, SCN1B	27	116	18079	17.317	0.915763	1	1
	GOTERM_MF_FAT	GO:0016247~channel regulator activity	3	9.09091	0.0195082	PACSIN3, FXYD6, SCN1B	27	150	18079	13.3919	0.98238	1	1
	GOTERM_MF_FAT	GO:0008200~ion channel inhibitor activity	2	6.06061	0.0519067	PACSIN3, SCN1B	27	37	18079	36.1942	0.999982	1	1
	GOTERM_MF_FAT	GO:0017080~sodium channel regulator activity	2	6.06061	0.0519067	FXYD6, SCN1B	27	37	18079	36.1942	0.999982	1	1
	GOTERM_MF_FAT	GO:0016248~channel inhibitor activity	2	6.06061	0.0546373	PACSIN3, SCN1B	27	39	18079	34.3381	0.99999	1	1
	GOTERM_MF_FAT	GO:0008092~cytoskeletal protein binding	5	15.1515	0.059512	TMOD1, PDLIM3, EPB41L1, KIF1C, PACSIN3	27	1041	18079	3.2161	0.999997	1	1
	KEGG_PATHWAY	mmu05412:Arrhythmogenic right ventricular cardiomyopathy	3	9.09091	0.0061619	SGCA, LAMA1, SGCG	15	77	8992	23.3558	0.270378	0.117871	0.117871
	KEGG_PATHWAY	mmu05416:Viral myocarditis	3	9.09091	0.00798306	SGCA, LAMA1, SGCG	15	88	8992	20.4364	0.335533	0.117871	0.117871
	KEGG_PATHWAY	mmu05410:Hypertrophic cardiomyopathy	3	9.09091	0.00851715	SGCA, LAMA1, SGCG	15	91	8992	19.7626	0.353534	0.117871	0.117871
	KEGG_PATHWAY	mmu05414:Dilated cardiomyopathy	3	9.09091	0.00906702	SGCA, LAMA1, SGCG	15	94	8992	19.1319	0.371568	0.117871	0.117871
Common down (Quadrant 3)	GOTERM_BP_FAT	GO:0030198~extracellular matrix organization	44	16.4179	3.80797e-32	TNXB, COL16A1, COL14A1, DPT, AEBP1, NID1, ADAMTS12, FBLN2, ANTXR1, LOXL1, LOXL2, ADAMTS4, ADAMTS16, ADAMTS5, ADAMTS15, ADAMTS2, ADAMTS14, FLRT2, ADAMTS1, CREB3L1, PDPN, SH3PXD2B, SERPINH1, ANXA2, CAV2, LUM, CAV1, MMP2, FN1, LAMB1, COL1A1, COL3A1, MMP14, COL1A2, CCDC80, COL4A2, COL5A1, COL4A1, COL4A4, COL5A3, COL5A2, COL4A5, GAS6, DDR2	246	321	20010	11.1496	1.79012e-28	1.16708e-28	1.07048e-28
	GOTERM_BP_FAT	GO:0043062~extracellular structure organization	44	16.4179	4.96628e-32	TNXB, COL16A1, COL14A1, DPT, AEBP1, NID1, ADAMTS12, FBLN2, ANTXR1, LOXL1, LOXL2, ADAMTS4, ADAMTS16, ADAMTS5, ADAMTS15, ADAMTS2, ADAMTS14, FLRT2, ADAMTS1, CREB3L1, PDPN, SH3PXD2B, SERPINH1, ANXA2, CAV2, LUM, CAV1, MMP2, FN1, LAMB1, COL1A1, COL3A1, MMP14, COL1A2, CCDC80, COL4A2, COL5A1, COL4A1, COL4A4, COL5A3, COL5A2, COL4A5, GAS6, DDR2	246	323	20010	11.0806	2.33465e-28	1.16708e-28	1.07048e-28
	GOTERM_BP_FAT	GO:0007155~cell adhesion	68	25.3731	1.11507e-20	NRP1, SNED1, SPON2, SPON1, COL16A1, TENM4, CSF1, COL14A1, PTPRK, ANTXR1, PCSK5, PTPRF, CD1D1, EMILIN2, CCN3, CD34, SOX4, TGM2, MMP2, FNDC3B, VCAN, MMP14, CCDC80, PALLD, COL6A2, CDH11, COL6A1, CERCAM, PKP2, COL6A3, GAS6, TNXB, LAMA2, LRP1, SRC, DPT, NID1, THBS2, ADAMTS12, NID2, FBLN2, THBS1, SRPX2, EFS, FLRT2, PDPN, IGFBP7, MPDZ, GPC6, WNT4, AOC3, PRNP, KIRREL, GSN, FZD4, CAV1, FN1, LAMB1, IGF1, C…	246	1542	20010	3.58704	5.24196e-17	1.74695e-17	1.60236e-17
	GOTERM_BP_FAT	GO:0022610~biological adhesion	68	25.3731	1.74682e-20	NRP1, SNED1, SPON2, SPON1, COL16A1, TENM4, CSF1, COL14A1, PTPRK, ANTXR1, PCSK5, PTPRF, CD1D1, EMILIN2, CCN3, CD34, SOX4, TGM2, MMP2, FNDC3B, VCAN, MMP14, CCDC80, PALLD, COL6A2, CDH11, COL6A1, CERCAM, PKP2, COL6A3, GAS6, TNXB, LAMA2, LRP1, SRC, DPT, NID1, THBS2, ADAMTS12, NID2, FBLN2, THBS1, SRPX2, EFS, FLRT2, PDPN, IGFBP7, MPDZ, GPC6, WNT4, AOC3, PRNP, KIRREL, GSN, FZD4, CAV1, FN1, LAMB1, IGF1, C…	246	1555	20010	3.55705	8.21181e-17	2.05252e-17	1.88264e-17
	GOTERM_BP_FAT	GO:0030199~collagen fibril organization	17	6.34328	1.0396e-17	TNXB, ANXA2, COL14A1, LUM, DPT, ADAMTS12, LOXL1, LOXL2, COL1A1, ADAMTS14, ADAMTS2, COL3A1, COL1A2, COL5A1, COL5A2, SERPINH1, DDR2	246	59	20010	23.4374	4.88716e-14	9.77225e-15	8.96344e-15
	GOTERM_BP_FAT	GO:0016477~cell migration	63	23.5075	4.03523e-17	IFITM3, NRP1, ECM1, SPARC, CSF1, IRS1, PLAT, PTPRK, FGF1, RND3, PCSK5, PTPRF, LOXL2, EFEMP1, BMPER, ADAMTS1, EMILIN2, CCN3, CD34, SERPINF1, MMP2, FNDC3B, VASH1, ZEB2, VCAN, MMP14, PALLD, PKP2, GAS6, DDR2, LRP1, SEMA3C, SRC, APCDD1, ADAMTS12, THBS1, FSTL1, LIMA1, SRPX2, EFS, FLRT2, PDPN, IGFBP6, GPC6, WNT4, AOC3, NTRK2, JUN, FZD4, CAV1, FN1, LAMB1, IGF1, COL1A1, IGSF10, COL3A1, COL5A1, ACKR3, LHX6…	246	1566	20010	3.27236	1.89696e-13	3.16093e-14	2.89931e-14
	GOTERM_BP_FAT	GO:0072359~circulatory system development	56	20.8955	9.33451e-17	NRP1, ECM1, SPARC, TENM4, COL14A1, FGF1, ADRA1A, ANTXR1, PCSK5, LOXL1, LOXL2, BMPER, ADAMTS1, CREB3L1, SH3PXD2B, EMILIN2, CCN3, CD34, SOX4, ANXA2, SERPINF1, MMP2, VASH1, VCAN, MMP14, COL4A2, COL4A1, ALDH1A2, PKP2, MEG3, LRP1, SEMA3C, THBS2, THBS1, SRPX2, FLRT2, PDPN, WNT4, NTRK2, JUN, FZD2, FZD4, CAV1, FN1, IGF1, DHRS3, BICC1, COL1A1, COL3A1, COL1A2, COL5A1, ID3, ACKR3, AMOTL2, FBN1, FGF10	246	1275	20010	3.57264	5.21916e-13	6.26746e-14	5.74872e-14
	GOTERM_BP_FAT	GO:0072358~cardiovascular system development	44	16.4179	6.10913e-16	MEG3, NRP1, ECM1, SPARC, LRP1, SEMA3C, THBS2, FGF1, THBS1, ANTXR1, PCSK5, LOXL1, LOXL2, SRPX2, BMPER, ADAMTS1, CREB3L1, PDPN, EMILIN2, CCN3, CD34, SOX4, WNT4, NTRK2, JUN, ANXA2, FZD4, SERPINF1, CAV1, MMP2, FN1, IGF1, VASH1, COL1A1, COL3A1, MMP14, COL1A2, COL4A2, COL5A1, COL4A1, ALDH1A2, ACKR3, AMOTL2, FGF10	246	824	20010	4.34348	3.1315e-12	3.19032e-13	2.92627e-13
	GOTERM_BP_FAT	GO:0001944~vasculature development	44	16.4179	6.10913e-16	MEG3, NRP1, ECM1, SPARC, LRP1, SEMA3C, THBS2, FGF1, THBS1, ANTXR1, PCSK5, LOXL1, LOXL2, SRPX2, BMPER, ADAMTS1, CREB3L1, PDPN, EMILIN2, CCN3, CD34, SOX4, WNT4, NTRK2, JUN, ANXA2, FZD4, SERPINF1, CAV1, MMP2, FN1, IGF1, VASH1, COL1A1, COL3A1, MMP14, COL1A2, COL4A2, COL5A1, COL4A1, ALDH1A2, ACKR3, AMOTL2, FGF10	246	824	20010	4.34348	3.1315e-12	3.19032e-13	2.92627e-13
	GOTERM_BP_FAT	GO:0040011~locomotion	71	26.4925	1.16326e-15	IFITM3, NRP1, ECM1, SPARC, CSF1, IRS1, PLAT, PTPRK, FGF1, RND3, PCSK5, PTPRF, LOXL2, EFEMP1, BMPER, ADAMTS1, EMILIN2, CCN3, CD34, SERPINF1, MMP2, ANXA5, FNDC3B, VASH1, ZEB2, VCAN, MMP14, PALLD, PKP2, GAS6, DDR2, MEG3, LAMA2, LRP1, SEMA3C, SRC, ARHGAP18, APCDD1, ADAMTS12, THBS1, FSTL1, LIMA1, SRPX2, EFS, FLRT2, PDPN, IGFBP6, PLTP, GPC6, WNT4, AOC3, NTRK2, JUN, CMTM3, FZD4, CAV2, CAV1, FN1, LAMB1, …	246	2071	20010	2.78863	5.21916e-12	4.98637e-13	4.57367e-13
	GOTERM_BP_FAT	GO:0048870~cell motility	66	24.6269	1.27312e-15	IFITM3, NRP1, ECM1, SPARC, CSF1, IRS1, PLAT, PTPRK, FGF1, RND3, PCSK5, PTPRF, LOXL2, EFEMP1, BMPER, ADAMTS1, EMILIN2, CCN3, CD34, SERPINF1, MMP2, ANXA5, FNDC3B, VASH1, ZEB2, VCAN, MMP14, PALLD, PKP2, GAS6, DDR2, LAMA2, LRP1, SEMA3C, SRC, APCDD1, ADAMTS12, THBS1, FSTL1, LIMA1, SRPX2, EFS, FLRT2, PDPN, IGFBP6, PLTP, GPC6, WNT4, AOC3, NTRK2, JUN, FZD4, CAV1, FN1, LAMB1, IGF1, COL1A1, IGSF10, COL3A1,…	246	1822	20010	2.94651	5.74107e-12	4.98637e-13	4.57367e-13
	GOTERM_BP_FAT	GO:0051674~localization of cell	66	24.6269	1.27312e-15	IFITM3, NRP1, ECM1, SPARC, CSF1, IRS1, PLAT, PTPRK, FGF1, RND3, PCSK5, PTPRF, LOXL2, EFEMP1, BMPER, ADAMTS1, EMILIN2, CCN3, CD34, SERPINF1, MMP2, ANXA5, FNDC3B, VASH1, ZEB2, VCAN, MMP14, PALLD, PKP2, GAS6, DDR2, LAMA2, LRP1, SEMA3C, SRC, APCDD1, ADAMTS12, THBS1, FSTL1, LIMA1, SRPX2, EFS, FLRT2, PDPN, IGFBP6, PLTP, GPC6, WNT4, AOC3, NTRK2, JUN, FZD4, CAV1, FN1, LAMB1, IGF1, COL1A1, IGSF10, COL3A1,…	246	1822	20010	2.94651	5.74107e-12	4.98637e-13	4.57367e-13
	GOTERM_BP_FAT	GO:0001568~blood vessel development	42	15.6716	2.39883e-15	MEG3, NRP1, ECM1, SPARC, LRP1, SEMA3C, THBS2, FGF1, THBS1, ANTXR1, PCSK5, LOXL1, LOXL2, SRPX2, BMPER, ADAMTS1, CREB3L1, EMILIN2, CCN3, CD34, SOX4, WNT4, NTRK2, JUN, ANXA2, FZD4, SERPINF1, CAV1, MMP2, FN1, VASH1, COL1A1, COL3A1, MMP14, COL1A2, COL4A2, COL5A1, COL4A1, ALDH1A2, ACKR3, AMOTL2, FGF10	246	779	20010	4.38555	1.14821e-11	8.6727e-13	7.9549e-13
	GOTERM_BP_FAT	GO:0031589~cell-substrate adhesion	30	11.194	2.89971e-15	NRP1, SNED1, TNXB, COL16A1, LRP1, CSF1, SRC, PTPRK, NID1, ADAMTS12, THBS1, NID2, FBLN2, ANTXR1, PCSK5, PDPN, CD34, WNT4, FZD4, FNDC3B, FN1, LAMB1, COL1A1, COL3A1, MARCKS, MMP14, CCDC80, COL5A3, GAS6, FERMT2	246	376	20010	6.49001	1.35698e-11	9.73473e-13	8.92903e-13
	GOTERM_BP_FAT	GO:0007167~enzyme linked receptor protein signaling pathway	46	17.1642	9.85296e-15	MEG3, NRP1, LRP1, CSF1, SRC, IRS1, HTRA1, PLAT, PTPRK, FGF1, ADAMTS12, THBS1, SOGA1, FSTL1, PTPRF, GHR, EFS, EFEMP1, FLRT2, BMPER, CREB3L1, PDK4, CCN3, WNT4, NTRK2, WWTR1, AFAP1L2, JUN, IGFBP4, CAV2, CAV1, IGF1, COL1A1, BMP3, ZEB2, COL3A1, MARCKS, COL1A2, COL4A2, COL4A1, COL4A5, GAS6, FERMT2, FGF10, FBN1, DDR2	246	973	20010	3.84554	4.64505e-11	3.08726e-12	2.83174e-12
	GOTERM_BP_FAT	GO:0048646~anatomical structure formation involved in morphogenesis	52	19.403	3.90061e-14	NRP1, ECM1, SPARC, TENM4, FAIM2, FGF1, LOXL2, ADAMTS5, SH3PXD2A, BMPER, ADAMTS1, CREB3L1, EMILIN2, CCN3, PTGFRN, CD34, SOX4, TGM2, ANXA2, SERPINF1, MMP2, KRT8, VASH1, ZEB2, MMP14, COL4A2, COL4A1, ALDH1A2, COL6A1, MEG3, SEMA3C, HTRA1, THBS2, THBS1, ADAMTS15, SRPX2, PDPN, WNT4, JUN, FZD2, CAV1, FN1, MTHFR, COL1A1, SDK1, COL3A1, KRT19, COL5A1, COL5A2, ACKR3, AMOTL2, FGF10	246	1275	20010	3.31746	1.83192e-10	1.13398e-11	1.04013e-11
	GOTERM_BP_FAT	GO:0006928~movement of cell or subcellular component	72	26.8657	4.10164e-14	IFITM3, NRP1, ECM1, SPARC, CSF1, IRS1, FMR1, PLAT, PTPRK, FGF1, RND3, PCSK5, PTPRF, LOXL2, EFEMP1, BMPER, ADAMTS1, EMILIN2, CCN3, CD34, SERPINF1, MMP2, ANXA5, FNDC3B, VASH1, ZEB2, VCAN, MMP14, PALLD, PKP2, GAS6, DDR2, MEG3, LAMA2, LRP1, SEMA3C, SRC, ARHGAP18, APCDD1, ADAMTS12, THBS1, FSTL1, LIMA1, SRPX2, EFS, FLRT2, PDPN, IGFBP6, PLTP, GPC6, WNT4, AOC3, NTRK2, JUN, GSN, FZD4, CAV1, FN1, LAMB1, IG…	246	2277	20010	2.57206	1.92587e-10	1.13398e-11	1.04013e-11
	GOTERM_BP_FAT	GO:0040012~regulation of locomotion	48	17.9104	2.55487e-13	IFITM3, NRP1, ECM1, SPARC, LAMA2, LRP1, CSF1, SEMA3C, SRC, IRS1, ARHGAP18, PTPRK, FGF1, THBS1, PCSK5, EFEMP1, SRPX2, FLRT2, BMPER, ADAMTS1, PDPN, EMILIN2, CCN3, WNT4, AOC3, JUN, FZD4, CAV2, SERPINF1, CAV1, MMP2, ANXA5, FN1, LAMB1, IGF1, VASH1, COL1A1, IGSF10, COL3A1, MMP14, PKP2, ACKR3, AMOTL2, AGRN, GAS6, FERMT2, FGF10, DDR2	246	1155	20010	3.38042	1.20093e-09	6.67106e-11	6.11892e-11
	GOTERM_BP_FAT	GO:2000145~regulation of cell motility	46	17.1642	2.78195e-13	IFITM3, NRP1, ECM1, SPARC, LAMA2, LRP1, CSF1, SEMA3C, SRC, IRS1, ARHGAP18, PTPRK, FGF1, THBS1, PCSK5, EFEMP1, SRPX2, FLRT2, BMPER, ADAMTS1, PDPN, EMILIN2, CCN3, WNT4, AOC3, JUN, FZD4, SERPINF1, CAV1, MMP2, ANXA5, FN1, LAMB1, IGF1, VASH1, COL1A1, IGSF10, COL3A1, MMP14, PKP2, ACKR3, AMOTL2, GAS6, FERMT2, FGF10, DDR2	246	1069	20010	3.50019	1.30792e-09	6.88167e-11	6.3121e-11
	GOTERM_BP_FAT	GO:0007166~cell surface receptor signaling pathway	80	29.8507	3.89199e-13	IFITM3, NRP1, ECM1, RIAN, CSF1, IRS1, FMR1, FCRLS, FAIM2, PLAT, PTPRK, FGF1, CPZ, SOGA1, PCSK5, PTPRF, GHR, EFEMP1, BMPER, CREB3L1, PDK4, CCN3, RSPO1, SOX4, DAPK1, IGFBP4, KRT8, ZEB2, MMP14, COL4A2, COL4A1, COL4A5, GAS6, DDR2, RBMS3, MEG3, LAMA2, LRP1, SEMA3C, SRC, HTRA1, NID1, DTX4, APCDD1, ADAMTS12, THBS1, FSTL1, ADCY5, OAS1G, ADAMTS14, EFS, FLRT2, WNT4, NTRK2, WWTR1, PRNP, AFAP1L2, JUN, FZD2, …	246	2837	20010	2.29373	1.82984e-09	9.14618e-11	8.38918e-11
	GOTERM_BP_FAT	GO:0030334~regulation of cell migration	44	16.4179	6.58654e-13	IFITM3, NRP1, ECM1, SPARC, LAMA2, LRP1, CSF1, SEMA3C, SRC, IRS1, PTPRK, FGF1, THBS1, PCSK5, EFEMP1, SRPX2, FLRT2, BMPER, ADAMTS1, PDPN, EMILIN2, CCN3, WNT4, AOC3, JUN, FZD4, SERPINF1, CAV1, MMP2, FN1, LAMB1, IGF1, VASH1, COL1A1, IGSF10, COL3A1, MMP14, PKP2, ACKR3, AMOTL2, GAS6, FERMT2, FGF10, DDR2	246	1008	20010	3.55062	3.09653e-09	1.47413e-10	1.35212e-10
	GOTERM_BP_FAT	GO:0051270~regulation of cellular component movement	47	17.5373	1.22757e-12	IFITM3, NRP1, ECM1, SPARC, LAMA2, LRP1, CSF1, SEMA3C, SRC, IRS1, ARHGAP18, PTPRK, FGF1, THBS1, PCSK5, EFEMP1, SRPX2, FLRT2, BMPER, ADAMTS1, PDPN, EMILIN2, CCN3, WNT4, AOC3, JUN, FZD4, SERPINF1, CAV1, MMP2, ANXA5, FN1, LAMB1, IGF1, VASH1, COL1A1, IGSF10, COL3A1, MMP14, PKP2, ACKR3, AMOTL2, AGRN, GAS6, FERMT2, FGF10, DDR2	246	1161	20010	3.29289	5.77082e-09	2.62253e-10	2.40547e-10
	GOTERM_BP_FAT	GO:0051240~positive regulation of multicellular organismal process	65	24.2537	5.42786e-12	IFITM3, NRP1, SPON2, ECM1, SPARC, TENM4, CSF1, IRS1, FMR1, PLAT, FGF1, ADRA1A, PTPRF, LOXL2, GHR, AKAP12, CD1D1, BMPER, ADAMTS1, CREB3L1, PALM, SH3PXD2B, TIMP2, EMILIN2, CD34, SOX4, TGM2, ANXA2, SERPINF1, MMD2, ZEB2, MMP14, GAS6, DDR2, MEG3, LRP1, SEMA3C, SRC, GM12248, THBS2, THBS1, NPAS2, OAS1G, SRPX2, FLRT2, CNR1, PDPN, WNT4, NTRK2, WWTR1, AFAP1L2, JUN, IFI204, LUM, CAV1, FN1, ISG15, IGF1, COL1…	246	2126	20010	2.48692	2.55165e-08	1.10917e-09	1.01737e-09
	GOTERM_BP_FAT	GO:0051094~positive regulation of developmental process	57	21.2687	1.07396e-11	IFITM3, NRP1, ECM1, TENM4, CSF1, FMR1, FGF1, PTPRF, LOXL2, MEDAG, GHR, CD1D1, BMPER, ADAMTS1, PALM, SH3PXD2B, TIMP2, EMILIN2, CD34, SOX4, TGM2, SERPINF1, FNDC3B, MMD2, ZEB2, MMP14, GAS6, DDR2, MEG3, LAMA2, LRP1, SEMA3C, SRC, GM12248, NID1, THBS2, THBS1, SRPX2, FLRT2, CNR1, PDPN, WNT4, NTRK2, WWTR1, JUN, IFI204, FN1, LAMB1, ISG15, IGF1, COL1A1, MARCKS, BMP1, MYO5B, AGRN, FERMT2, FGF10	246	1732	20010	2.67694	5.04865e-08	2.10316e-09	1.92909e-09
	GOTERM_BP_FAT	GO:0048514~blood vessel morphogenesis	34	12.6866	1.3937e-11	MEG3, NRP1, ECM1, SPARC, LRP1, THBS2, FGF1, THBS1, LOXL2, SRPX2, BMPER, ADAMTS1, CREB3L1, EMILIN2, CCN3, CD34, SOX4, WNT4, NTRK2, JUN, ANXA2, FZD4, SERPINF1, CAV1, MMP2, FN1, VASH1, COL3A1, MMP14, COL4A2, COL4A1, ACKR3, AMOTL2, FGF10	246	678	20010	4.07907	6.55177e-08	2.62016e-09	2.4033e-09
	GOTERM_BP_FAT	GO:0001501~skeletal system development	31	11.5672	2.68002e-11	ECM1, SPARC, SRC, NPR3, ADAMTS12, THBS1, PCSK5, LOXL2, GHR, EFEMP1, CTSK, SH3PXD2B, SERPINH1, CCN3, SOX4, TGM2, ANXA2, LUM, MMP2, IGF1, DHRS3, COL1A1, BMP3, VCAN, COL3A1, MMP14, COL1A2, BMP1, COL5A2, OGN, FBN1	246	578	20010	4.3626	1.25988e-07	4.84466e-09	4.44369e-09
	GOTERM_BP_FAT	GO:0009611~response to wounding	33	12.3134	2.87678e-11	NRP1, SPARC, LRP1, AHNAK, PLAT, FGF1, THBS1, PTPRF, PDPN, EMILIN2, CCN3, PTGFRN, CD34, WNT4, JUN, GSN, MUC16, ANXA2, CAV1, MMP2, ANXA5, FN1, IGF1, VASH1, COL1A1, IGSF10, COL3A1, COL5A1, ID3, GAS6, FERMT2, FGF10, DDR2	246	657	20010	4.08564	1.35238e-07	5.00773e-09	4.59326e-09
	GOTERM_BP_FAT	GO:0009887~animal organ morphogenesis	45	16.791	3.80517e-11	NRP1, LAMA2, CSF1, SEMA3C, SRC, HTRA1, AQP5, FGF1, APCDD1, THBS1, GHR, ADAMTS16, ADAMTS5, EFEMP1, FLRT2, ADAMTS1, SH3PXD2B, SERPINH1, CD34, SOX4, WNT4, TGM2, NTRK2, WWTR1, JUN, FZD2, CAV1, MMP2, LAMB1, IGF1, DHRS3, MFAP5, COL1A1, SDK1, COL3A1, MMP14, COL1A2, COL5A1, ALDH1A2, COL5A2, PKP2, ID3, AGRN, FGF10, FBN1	246	1188	20010	3.08112	1.78881e-07	6.3524e-09	5.82664e-09
	GOTERM_BP_FAT	GO:0007169~transmembrane receptor protein tyrosine kinase signaling pathway	31	11.5672	3.91957e-11	MEG3, NRP1, LRP1, CSF1, SRC, IRS1, PLAT, FGF1, ADAMTS12, THBS1, SOGA1, PTPRF, GHR, EFS, EFEMP1, FLRT2, CREB3L1, PDK4, WNT4, NTRK2, AFAP1L2, IGFBP4, CAV2, IGF1, COL1A1, MARCKS, COL4A2, COL4A1, COL4A5, FGF10, DDR2	246	587	20010	4.29572	1.84259e-07	6.3524e-09	5.82664e-09
	GOTERM_BP_FAT	GO:0007160~cell-matrix adhesion	20	7.46269	6.23615e-11	NRP1, SNED1, TNXB, COL16A1, LRP1, CSF1, SRC, FN1, PTPRK, ADAMTS12, NID1, THBS1, PCSK5, NID2, MMP14, COL3A1, COL5A3, CD34, FERMT2, WNT4	246	229	20010	7.10406	2.93162e-07	9.76998e-09	8.96135e-09
	GOTERM_BP_FAT	GO:0045597~positive regulation of cell differentiation	45	16.791	1.29322e-10	IFITM3, MEG3, NRP1, LAMA2, LRP1, TENM4, CSF1, SEMA3C, GM12248, FMR1, NID1, PTPRF, LOXL2, MEDAG, GHR, CD1D1, CNR1, ADAMTS1, PDPN, SH3PXD2B, PALM, TIMP2, CD34, SOX4, WNT4, TGM2, NTRK2, WWTR1, JUN, IFI204, SERPINF1, FNDC3B, FN1, LAMB1, ISG15, MMD2, IGF1, COL1A1, ZEB2, MARCKS, MMP14, MYO5B, GAS6, FERMT2, DDR2	246	1234	20010	2.96626	6.07941e-07	1.96068e-08	1.79841e-08
	GOTERM_BP_FAT	GO:0097435~supramolecular fiber organization	36	13.4328	1.44308e-10	NRP1, TNXB, COL14A1, SRC, DPT, ARHGAP18, AEBP1, ADAMTS12, RND3, LOXL1, LOXL2, LIMA1, ADAMTS2, ADAMTS14, EFS, SH3PXD2B, SERPINH1, WNT4, KIRREL, GSN, ANXA2, LUM, CAV1, KRT8, MFAP5, COL1A1, COL3A1, KRT19, MARCKS, COL1A2, COL5A1, MYO5B, COL5A2, PKP2, FERMT2, DDR2	246	826	20010	3.54515	6.78393e-07	2.11953e-08	1.9441e-08
	GOTERM_BP_FAT	GO:0045595~regulation of cell differentiation	63	23.5075	1.5571e-10	IFITM3, NRP1, TENM4, CSF1, COL14A1, FMR1, PTPRF, LOXL2, MEDAG, GHR, CD1D1, EFEMP1, ADAMTS1, PALM, SH3PXD2B, TIMP2, CCN3, CD34, SOX4, TGM2, ANXA2, SERPINF1, FNDC3B, MMD2, ZEB2, MMP14, PKP2, GAS6, JDP2, DDR2, MEG3, LAMA2, LRP1, SEMA3C, GM12248, NID1, ADAMTS12, FLRT2, CNR1, PDPN, WNT4, NTRK2, WWTR1, JUN, IFI204, CAV1, FN1, LAMB1, ISG15, IGF1, COL1A1, IGSF10, SDK1, COL3A1, MARCKS, COL5A1, MYO5B, COL5…	246	2186	20010	2.34424	7.31994e-07	2.21769e-08	2.03414e-08
	GOTERM_BP_FAT	GO:0042060~wound healing	26	9.70149	8.93726e-10	SPARC, AHNAK, PLAT, FGF1, THBS1, PDPN, EMILIN2, CCN3, PTGFRN, CD34, WNT4, GSN, MUC16, ANXA2, CAV1, ANXA5, FN1, IGF1, COL1A1, IGSF10, COL3A1, COL5A1, GAS6, FERMT2, FGF10, DDR2	246	472	20010	4.48067	4.2014e-06	1.23544e-07	1.13319e-07
	GOTERM_BP_FAT	GO:0001503~ossification	25	9.32836	1.05707e-09	IFITM3, ECM1, SPARC, CSF1, ADAMTS12, CTSK, CREB3L1, SH3PXD2B, WNT4, WWTR1, IFI204, MMP2, FNDC3B, ISG15, IGF1, COL1A1, IGSF10, BMP3, MMP14, COL1A2, BMP1, COL5A2, ID3, FERMT2, DDR2	246	439	20010	4.6322	4.96926e-06	1.41949e-07	1.302e-07
	GOTERM_BP_FAT	GO:0001525~angiogenesis	28	10.4478	1.92504e-09	MEG3, NRP1, ECM1, SPARC, THBS2, FGF1, THBS1, LOXL2, SRPX2, BMPER, ADAMTS1, CREB3L1, EMILIN2, CCN3, CD34, JUN, ANXA2, SERPINF1, CAV1, MMP2, FN1, VASH1, MMP14, COL4A2, COL4A1, ACKR3, AMOTL2, FGF10	246	568	20010	4.00979	9.04955e-06	2.51324e-07	2.30523e-07
	GOTERM_BP_FAT	GO:0022603~regulation of anatomical structure morphogenesis	41	15.2985	3.18144e-09	MEG3, NRP1, ECM1, SPARC, LRP1, TENM4, CSF1, SEMA3C, SRC, ARHGAP18, THBS2, FGF1, ADAMTS12, APCDD1, THBS1, RND3, PTPRF, SRPX2, BMPER, PALMD, ADAMTS1, CREB3L1, PDPN, PALM, EMILIN2, CD34, WNT4, NTRK2, FZD2, SERPINF1, FN1, VASH1, ZEB2, MARCKS, COL4A2, COL5A1, MYO5B, COL5A2, AGRN, FERMT2, FGF10	246	1167	20010	2.85775	1.49558e-05	4.04128e-07	3.7068e-07
	GOTERM_BP_FAT	GO:0010033~response to organic substance	88	32.8358	3.53067e-09	IFITM3, NRP1, SPON2, ECM1, COL16A1, SPARC, CSF1, IRS1, FMR1, PTPRK, FGF1, ADRA1A, SOGA1, LOXL1, PTPRF, GHR, AKAP12, CASP12, BMPER, CREB3L1, PDK4, TIMP2, SOX4, TGM2, ANXA2, DAPK1, SERPINF1, MMP2, ANXA5, KRT8, PCOLCE, DNM1, MTSS2, GBP11, ZEB2, F830016B08RIK, MMP14, COL4A2, COL4A1, COL6A2, ALDH1A2, COL6A1, GM4951, LY6A, GAS6, MEG3, LRP1, SRC, HTRA1, GSTT1, ADAMTS12, THBS1, FSTL1, ADCY5, OAS1G, FLRT2…	246	3923	20010	1.82464	1.65976e-05	4.36689e-07	4.00546e-07
	GOTERM_BP_FAT	GO:0044259~multicellular organismal macromolecule metabolic process	14	5.22388	3.76799e-09	TNXB, MMP2, FN1, COL1A1, MRC2, MMP14, ADAMTS2, COL1A2, COL5A1, CTSK, CREB3L1, SERPINH1, DDR2, WNT4	246	123	20010	9.25838	1.77131e-05	4.38933e-07	4.02604e-07
	GOTERM_BP_FAT	GO:0032963~collagen metabolic process	14	5.22388	3.76799e-09	TNXB, MMP2, FN1, COL1A1, MRC2, MMP14, ADAMTS2, COL1A2, COL5A1, CTSK, CREB3L1, SERPINH1, DDR2, WNT4	246	123	20010	9.25838	1.77131e-05	4.38933e-07	4.02604e-07
	GOTERM_BP_FAT	GO:0009966~regulation of signal transduction	75	27.9851	3.82899e-09	NRP1, ECM1, RIAN, CSF1, IRS1, FAIM2, FGF1, ADRA1A, PCSK5, PTPRF, GHR, AKAP12, BMPER, CREB3L1, PALM, TIMP2, CCN3, RSPO1, SOX4, TGM2, ANXA2, DAPK1, IGFBP4, MMD2, DNM1, ZEB2, MMP14, ADRB3, GAS6, DDR2, RBMS3, MEG3, TNXB, LAMA2, LRP1, SRC, HTRA1, ARHGAP18, NID1, APCDD1, ADAMTS12, THBS1, FSTL1, C9ORF72, OAS1G, IGFBP7, IGFBP6, GPC6, WNT4, NTRK2, WWTR1, PRNP, AFAP1L2, JUN, GSN, CMTM3, FZD4, CAV2, CAV1, C…	246	3095	20010	1.97112	1.79999e-05	4.38933e-07	4.02604e-07
	GOTERM_BP_FAT	GO:0071310~cellular response to organic substance	71	26.4925	5.23066e-09	IFITM3, NRP1, SPON2, ECM1, COL16A1, SPARC, CSF1, IRS1, PTPRK, FGF1, SOGA1, PTPRF, GHR, AKAP12, CASP12, BMPER, CREB3L1, PDK4, TIMP2, SOX4, TGM2, DAPK1, SERPINF1, MMP2, ANXA5, KRT8, PCOLCE, MTSS2, GBP11, ZEB2, F830016B08RIK, COL4A2, COL4A1, ALDH1A2, COL6A1, GM4951, GAS6, MEG3, LRP1, SRC, HTRA1, ADAMTS12, THBS1, FSTL1, ADCY5, OAS1G, FLRT2, IGFBP7, WNT4, NTRK2, PRNP, JUN, GSN, IFI204, FZD4, CAV2, CAV…	246	2869	20010	2.01298	2.4589e-05	5.72406e-07	5.25031e-07
	GOTERM_BP_FAT	GO:0044236~multicellular organism metabolic process	15	5.59701	5.23691e-09	TNXB, MMP2, FN1, COL1A1, MRC2, MMP14, ADAMTS2, COL1A2, ADRB3, COL5A1, CTSK, CREB3L1, SERPINH1, DDR2, WNT4	246	151	20010	8.08028	2.46184e-05	5.72406e-07	5.25031e-07
	GOTERM_BP_FAT	GO:0030335~positive regulation of cell migration	28	10.4478	6.00817e-09	NRP1, SPARC, LRP1, CSF1, SEMA3C, SRC, IRS1, FGF1, THBS1, PCSK5, SRPX2, ADAMTS1, PDPN, AOC3, JUN, FZD4, CAV1, MMP2, FN1, LAMB1, IGF1, COL1A1, MMP14, ACKR3, GAS6, FERMT2, FGF10, DDR2	246	599	20010	3.80227	2.8244e-05	6.41782e-07	5.88664e-07
	GOTERM_BP_FAT	GO:0070848~response to growth factor	32	11.9403	6.6919e-09	MEG3, NRP1, SPARC, LRP1, SRC, HTRA1, PTPRK, FGF1, ADAMTS12, THBS1, FSTL1, PTPRF, FLRT2, BMPER, CREB3L1, WNT4, NTRK2, JUN, FZD4, CAV2, LUM, CAV1, MTSS2, COL1A1, ZEB2, COL3A1, COL1A2, COL4A2, GAS6, FERMT2, FGF10, FBN1	246	773	20010	3.36731	3.14581e-05	6.98932e-07	6.41084e-07
	GOTERM_BP_FAT	GO:0070887~cellular response to chemical stimulus	81	30.2239	8.80594e-09	IFITM3, NRP1, SPON2, ECM1, COL16A1, SPARC, CSF1, IRS1, FMR1, PTPRK, FGF1, SOGA1, PTPRF, GHR, AKAP12, CASP12, BMPER, CREB3L1, PDK4, TIMP2, CCN3, CD34, SOX4, TGM2, ANXA2, DAPK1, SERPINF1, MMP2, ANXA5, KRT8, PCOLCE, MTSS2, GBP11, ZEB2, F830016B08RIK, COL4A2, FNDC1, COL4A1, ALDH1A2, COL6A1, GM4951, LY6A, GAS6, DDR2, MEG3, LRP1, SRC, HTRA1, GSTT1, ADAMTS12, THBS1, FSTL1, ADCY5, OAS1G, FLRT2, IGFBP7, W…	246	3537	20010	1.86278	4.13959e-05	8.99737e-07	8.25269e-07
	GOTERM_BP_FAT	GO:0010646~regulation of cell communication	83	30.9701	9.17974e-09	NRP1, ECM1, RIAN, CSF1, IRS1, FMR1, FAIM2, FGF1, ADRA1A, PCSK5, PTPRF, GHR, AKAP12, BMPER, CREB3L1, PALM, TIMP2, CCN3, RSPO1, SOX4, TGM2, ANXA2, DAPK1, IGFBP4, ANXA5, MMD2, DNM1, ZEB2, MMP14, ADRB3, CDH11, GAS6, DDR2, RBMS3, MEG3, TNXB, LAMA2, LRP1, SRC, HTRA1, ARHGAP18, NID1, APCDD1, ADAMTS12, THBS1, FSTL1, C9ORF72, ADCY5, OAS1G, CNR1, NNAT, SNCG, IGFBP7, IGFBP6, GPC6, WNT4, NTRK2, WWTR1, PRNP, …	246	3670	20010	1.8396	4.3153e-05	9.17974e-07	8.41997e-07
	GOTERM_BP_FAT	GO:0071363~cellular response to growth factor stimulus	31	11.5672	1.01908e-08	MEG3, NRP1, SPARC, LRP1, SRC, HTRA1, PTPRK, FGF1, ADAMTS12, THBS1, FSTL1, PTPRF, FLRT2, BMPER, CREB3L1, WNT4, NTRK2, JUN, FZD4, CAV2, CAV1, MTSS2, COL1A1, ZEB2, COL3A1, COL1A2, COL4A2, GAS6, FERMT2, FGF10, FBN1	246	743	20010	3.39379	4.79057e-05	9.97848e-07	9.1526e-07
	GOTERM_BP_FAT	GO:0040017~positive regulation of locomotion	29	10.8209	1.07585e-08	NRP1, SPARC, LRP1, CSF1, SEMA3C, SRC, IRS1, FGF1, THBS1, PCSK5, SRPX2, ADAMTS1, PDPN, AOC3, JUN, FZD4, CAV2, CAV1, MMP2, FN1, LAMB1, IGF1, COL1A1, MMP14, ACKR3, GAS6, FERMT2, FGF10, DDR2	246	658	20010	3.58496	5.05743e-05	1.03194e-06	9.46526e-07
	GOTERM_BP_FAT	GO:0001934~positive regulation of protein phosphorylation	38	14.1791	1.21078e-08	NRP1, LRP1, CSF1, SRC, GM12248, FMR1, FGF1, THBS1, ADRA1A, AKAP12, GHR, BMPER, TIMP2, RSPO1, IGFBP6, NTRK2, PRNP, JUN, ANXA2, IGFBP4, FZD4, CAV2, CAV1, CAVIN3, MMD2, IGF1, BMP3, ZEB2, MARCKS, ADRB3, FNDC1, ACKR3, AGRN, GAS6, FERMT2, FGF10, FBN1, DDR2	246	1075	20010	2.87533	5.69173e-05	1.13814e-06	1.04394e-06
	GOTERM_BP_FAT	GO:0023051~regulation of signaling	83	30.9701	1.24625e-08	NRP1, ECM1, RIAN, CSF1, IRS1, FMR1, FAIM2, FGF1, ADRA1A, PCSK5, PTPRF, GHR, AKAP12, BMPER, CREB3L1, PALM, TIMP2, CCN3, RSPO1, SOX4, TGM2, ANXA2, DAPK1, IGFBP4, ANXA5, MMD2, DNM1, ZEB2, MMP14, ADRB3, CDH11, GAS6, DDR2, RBMS3, MEG3, TNXB, LAMA2, LRP1, SRC, HTRA1, ARHGAP18, NID1, APCDD1, ADAMTS12, THBS1, FSTL1, C9ORF72, ADCY5, OAS1G, CNR1, NNAT, SNCG, IGFBP7, IGFBP6, GPC6, WNT4, NTRK2, WWTR1, PRNP, …	246	3694	20010	1.82765	5.85846e-05	1.14851e-06	1.05345e-06
	GOTERM_BP_FAT	GO:2000147~positive regulation of cell motility	28	10.4478	1.51549e-08	NRP1, SPARC, LRP1, CSF1, SEMA3C, SRC, IRS1, FGF1, THBS1, PCSK5, SRPX2, ADAMTS1, PDPN, AOC3, JUN, FZD4, CAV1, MMP2, FN1, LAMB1, IGF1, COL1A1, MMP14, ACKR3, GAS6, FERMT2, FGF10, DDR2	246	626	20010	3.63828	7.12405e-05	1.36977e-06	1.2564e-06
	GOTERM_BP_FAT	GO:0042327~positive regulation of phosphorylation	39	14.5522	2.3198e-08	NRP1, LRP1, CSF1, SRC, IRS1, GM12248, FMR1, FGF1, THBS1, ADRA1A, AKAP12, GHR, BMPER, TIMP2, RSPO1, IGFBP6, NTRK2, PRNP, JUN, ANXA2, IGFBP4, FZD4, CAV2, CAV1, CAVIN3, MMD2, IGF1, BMP3, ZEB2, MARCKS, ADRB3, FNDC1, ACKR3, AGRN, GAS6, FERMT2, FGF10, FBN1, DDR2	246	1152	20010	2.75375	0.000109048	2.05718e-06	1.88692e-06
	GOTERM_BP_FAT	GO:0051272~positive regulation of cellular component movement	28	10.4478	2.81603e-08	NRP1, SPARC, LRP1, CSF1, SEMA3C, SRC, IRS1, FGF1, THBS1, PCSK5, SRPX2, ADAMTS1, PDPN, AOC3, JUN, FZD4, CAV1, MMP2, FN1, LAMB1, IGF1, COL1A1, MMP14, ACKR3, GAS6, FERMT2, FGF10, DDR2	246	645	20010	3.5311	0.000132373	2.45099e-06	2.24813e-06
	GOTERM_BP_FAT	GO:0010810~regulation of cell-substrate adhesion	17	6.34328	2.96766e-08	NRP1, COL16A1, LRP1, CSF1, SRC, FZD4, FN1, NID1, THBS1, FBLN2, PCSK5, COL1A1, MMP14, CCDC80, PDPN, FERMT2, WNT4	246	232	20010	5.96037	0.0001395	2.536e-06	2.3261e-06
	GOTERM_BP_FAT	GO:0007507~heart development	29	10.8209	3.56779e-08	NRP1, SPARC, LRP1, TENM4, SEMA3C, COL14A1, FGF1, THBS1, ADRA1A, PCSK5, FLRT2, ADAMTS1, PDPN, SH3PXD2B, SOX4, JUN, FZD2, MMP2, FN1, IGF1, BICC1, DHRS3, VCAN, COL3A1, COL5A1, ALDH1A2, PKP2, ID3, FBN1	246	696	20010	3.38923	0.000167708	2.99439e-06	2.74656e-06
	GOTERM_BP_FAT	GO:0008283~cell proliferation	57	21.2687	4.47103e-08	IFITM3, ECM1, RIAN, SPARC, TENM4, CSF1, IRS1, PTPRK, FGF1, PTPRF, LOXL2, CD1D1, EFEMP1, BMPER, ADAMTS1, TIMP2, CCN3, RSPO1, CD34, SOX4, TGM2, ANXA2, IGFBP4, SERPINF1, MMP2, FNDC3B, VASH1, ZEB2, MMP14, ALDH1A2, PKP2, GAS6, DDR2, MEG3, LRP1, SRC, NPR3, HTRA1, DPT, THBS1, PDPN, WNT4, NTRK2, WWTR1, PRNP, JUN, MUC16, CAV2, CAV1, FN1, IGF1, COL3A1, OGN, ACKR3, CD248, FERMT2, FGF10	246	2170	20010	2.13662	0.000210161	3.68664e-06	3.38151e-06
	GOTERM_BP_FAT	GO:0061448~connective tissue development	19	7.08955	6.85569e-08	ECM1, CSF1, LUM, IGF1, ADAMTS12, THBS1, LOXL2, GHR, COL1A1, BMP3, COL3A1, EFEMP1, BMP1, COL5A1, CTSK, SH3PXD2B, SERPINH1, CCN3, CD34	246	314	20010	4.92194	0.000322234	5.55548e-06	5.09567e-06
	GOTERM_BP_FAT	GO:0001667~ameboidal-type cell migration	23	8.58209	7.47444e-08	NRP1, JUN, SPARC, SEMA3C, SRC, IRS1, SERPINF1, FNDC3B, FN1, IGF1, VASH1, FGF1, THBS1, FSTL1, LOXL2, ZEB2, SRPX2, BMPER, AMOTL2, CD248, CCN3, DDR2, FGF10	246	466	20010	4.01471	0.000351312	5.95421e-06	5.46141e-06
	GOTERM_BP_FAT	GO:0001655~urogenital system development	22	8.20896	7.83377e-08	WWTR1, NRP1, MMP2, SERPINF1, IGF1, FGF1, NID1, PCSK5, BICC1, ADAMTS16, VCAN, BMPER, ADAMTS1, COL4A1, ALDH1A2, COL4A4, ID3, CD34, SOX4, FBN1, WNT4, FGF10	246	428	20010	4.1811	0.000368198	6.13645e-06	5.62856e-06
	GOTERM_BP_FAT	GO:0043410~positive regulation of MAPK cascade	25	9.32836	1.09681e-07	NRP1, LRP1, SRC, FGF1, THBS1, ADRA1A, AKAP12, GHR, BMPER, TIMP2, IGFBP6, NTRK2, JUN, IGFBP4, FZD4, CAV2, CAVIN3, IGF1, ZEB2, ADRB3, ACKR3, GAS6, FERMT2, FGF10, DDR2	246	559	20010	3.63781	0.000515476	8.45081e-06	7.75137e-06
	GOTERM_BP_FAT	GO:0048585~negative regulation of response to stimulus	49	18.2836	1.30613e-07	NRP1, ECM1, RIAN, IRS1, FAIM2, PLAT, ADRA1A, PTPRF, BMPER, CREB3L1, PALM, TIMP2, CCN3, CD34, ANXA2, SERPINF1, ANXA5, DNM1, MMP14, GAS6, DDR2, RBMS3, MEG3, LRP1, SEMA3C, SRC, HTRA1, APCDD1, ADAMTS12, THBS1, C9ORF72, OAS1G, WNT4, WWTR1, PRNP, MUC16, IFI204, FZD4, CAV2, CAV1, CAVIN3, ISG15, IGF1, DHRS3, BICC1, COL3A1, ACKR3, FBN1, FGF10	246	1775	20010	2.24548	0.000613822	9.9013e-06	9.0818e-06
	GOTERM_BP_FAT	GO:0032270~positive regulation of cellular protein metabolic process	48	17.9104	1.58643e-07	NRP1, SPON1, LRP1, CSF1, SRC, GM12248, FMR1, FGF1, THBS1, ADRA1A, ANTXR1, AKAP12, GHR, CASP12, BMPER, TIMP2, RSPO1, IGFBP6, SOX4, NTRK2, PRNP, JUN, GSN, IFI204, ANXA2, DAPK1, IGFBP4, FZD4, CAV2, CAV1, CAVIN3, MMD2, IGF1, BMP3, ZEB2, MARCKS, MMP14, ADRB3, FNDC1, ACKR3, AGRN, GAS6, FERMT2, JDP2, RBMS3, FGF10, FBN1, DDR2	246	1730	20010	2.25687	0.000745505	1.1679e-05	1.07123e-05
	GOTERM_BP_FAT	GO:0009719~response to endogenous stimulus	51	19.0299	1.59033e-07	COL16A1, SPARC, IRS1, PTPRK, FGF1, ADRA1A, SOGA1, PTPRF, GHR, BMPER, CREB3L1, PDK4, TIMP2, TGM2, ANXA2, SERPINF1, MMP2, ANXA5, DNM1, MTSS2, ZEB2, MMP14, COL4A2, COL4A1, COL6A1, LRP1, SRC, HTRA1, ADAMTS12, THBS1, FLRT2, CNR1, IGFBP7, WNT4, NTRK2, PRNP, JUN, GSN, CAV2, CAV1, MTHFR, IGF1, COL1A1, SDK1, COL3A1, MARCKS, COL1A2, COL5A2, FERMT2, FBN1, FGF10	246	1901	20010	2.18223	0.000747334	1.1679e-05	1.07123e-05
	GOTERM_BP_FAT	GO:0022008~neurogenesis	52	19.403	1.64882e-07	NRP1, TENM4, CSF1, FMR1, FAIM2, PTPRK, PTPRF, EFEMP1, ADAMTS1, PALM, TIMP2, EFHD1, SOX4, TGM2, ANXA2, SERPINF1, MMP2, MMD2, ZEB2, VCAN, MMP14, PALLD, ALDH1A2, CDH11, GAS6, MEG3, LAMA2, LRP1, SEMA3C, APCDD1, C9ORF72, FLRT2, CNR1, MPDZ, WNT4, NTRK2, JUN, GSN, FZD2, CAV1, FN1, LAMB1, IGF1, IGSF10, SDK1, COL3A1, MARCKS, MYO5B, ID3, LHX6, AGRN, FGF10	246	1961	20010	2.15694	0.000774809	1.19222e-05	1.09355e-05
	GOTERM_BP_FAT	GO:0045937~positive regulation of phosphate metabolic process	39	14.5522	2.07312e-07	NRP1, LRP1, CSF1, SRC, IRS1, GM12248, FMR1, FGF1, THBS1, ADRA1A, AKAP12, GHR, BMPER, TIMP2, RSPO1, IGFBP6, NTRK2, PRNP, JUN, ANXA2, IGFBP4, FZD4, CAV2, CAV1, CAVIN3, MMD2, IGF1, BMP3, ZEB2, MARCKS, ADRB3, FNDC1, ACKR3, AGRN, GAS6, FERMT2, FGF10, FBN1, DDR2	246	1254	20010	2.52976	0.000974101	1.45428e-05	1.33392e-05
	GOTERM_BP_FAT	GO:0010562~positive regulation of phosphorus metabolic process	39	14.5522	2.07312e-07	NRP1, LRP1, CSF1, SRC, IRS1, GM12248, FMR1, FGF1, THBS1, ADRA1A, AKAP12, GHR, BMPER, TIMP2, RSPO1, IGFBP6, NTRK2, PRNP, JUN, ANXA2, IGFBP4, FZD4, CAV2, CAV1, CAVIN3, MMD2, IGF1, BMP3, ZEB2, MARCKS, ADRB3, FNDC1, ACKR3, AGRN, GAS6, FERMT2, FGF10, FBN1, DDR2	246	1254	20010	2.52976	0.000974101	1.45428e-05	1.33392e-05
	GOTERM_BP_FAT	GO:0051247~positive regulation of protein metabolic process	49	18.2836	2.75281e-07	NRP1, SPON1, CSF1, FMR1, FGF1, ADRA1A, ANTXR1, GHR, AKAP12, CASP12, BMPER, TIMP2, RSPO1, SOX4, ANXA2, DAPK1, IGFBP4, SLC2A13, MMD2, ZEB2, MMP14, ADRB3, FNDC1, GAS6, JDP2, DDR2, RBMS3, LRP1, SRC, GM12248, THBS1, IGFBP6, NTRK2, PRNP, JUN, GSN, IFI204, FZD4, CAV2, CAV1, CAVIN3, IGF1, BMP3, MARCKS, ACKR3, AGRN, FERMT2, FBN1, FGF10	246	1820	20010	2.18996	0.00129326	1.88705e-05	1.73087e-05
	GOTERM_BP_FAT	GO:0007399~nervous system development	63	23.5075	2.80263e-07	NRP1, TENM4, CSF1, FMR1, FAIM2, PTPRK, PTPRF, EFEMP1, ADAMTS1, PALM, TIMP2, EFHD1, SOX4, TGM2, ANXA2, SERPINF1, MMP2, MMD2, ZEB2, VCAN, MMP14, PALLD, COL4A1, ALDH1A2, CDH11, GAS6, MEG3, LAMA2, LRP1, SEMA3C, SRC, APCDD1, THBS2, C9ORF72, SLC5A3, SRPX2, FLRT2, CNR1, NNAT, MPDZ, GPC6, WNT4, NTRK2, JUN, GSN, FZD2, FZD4, CAV1, LGI2, FN1, MTHFR, LAMB1, IGF1, IGSF10, SDK1, COL3A1, MARCKS, MYO5B, ID3, ACK…	246	2659	20010	1.92723	0.00131665	1.88705e-05	1.73087e-05
	GOTERM_BP_FAT	GO:0072001~renal system development	20	7.46269	2.8105e-07	WWTR1, NRP1, SERPINF1, FGF1, NID1, PCSK5, BICC1, ADAMTS16, VCAN, BMPER, ADAMTS1, COL4A1, ALDH1A2, COL4A4, ID3, CD34, SOX4, FBN1, WNT4, FGF10	246	383	20010	4.2476	0.00132034	1.88705e-05	1.73087e-05
	GOTERM_BP_FAT	GO:0051241~negative regulation of multicellular organismal process	42	15.6716	3.19035e-07	MEG3, NRP1, ECM1, SPARC, LRP1, SEMA3C, FMR1, PLAT, THBS2, ADAMTS12, THBS1, ADRA1A, LOXL2, OAS1G, LAPTM4B, EFEMP1, ADAMTS1, CTSK, CREB3L1, CCN3, CD34, WNT4, PRNP, MUC16, ANXA2, SERPINF1, CAV1, MMP2, ANXA5, FNDC3B, FN1, SSC5D, IGF1, VASH1, COL3A1, COL4A2, COL5A1, ADRB3, COL5A2, ID3, GAS6, FBN1	246	1437	20010	2.37741	0.00149866	2.11192e-05	1.93713e-05
	GOTERM_BP_FAT	GO:0048584~positive regulation of response to stimulus	63	23.5075	4.16115e-07	NRP1, SPON2, CSF1, IRS1, FMR1, PLAT, FGF1, ADRA1A, PCSK5, GHR, AKAP12, CD1D1, C1S1, BMPER, TIMP2, EMILIN2, CCN3, RSPO1, SOX4, TGM2, ANXA2, IGFBP4, MMD2, ZEB2, ADRB3, GAS6, DDR2, LAMA2, LRP1, AHNAK, SRC, NID1, THBS1, NPAS2, OAS1G, C2, CNR1, PDPN, IGFBP6, AOC3, NTRK2, PRNP, AFAP1L2, JUN, C1RA, GSN, CMTM3, IFI204, FZD4, CAV2, CAV1, CAVIN3, FN1, LAMB1, IGF1, COL1A1, BMP3, COL3A1, MARCKS, ACKR3, FERMT…	246	2689	20010	1.90573	0.00195425	2.71631e-05	2.49149e-05
	GOTERM_BP_FAT	GO:0071822~protein complex subunit organization	40	14.9254	5.20618e-07	TNXB, STEAP4, COL16A1, COL14A1, SRC, DPT, ARHGAP18, AQP5, ADAMTS12, PCSK5, LOXL1, LOXL2, OAS1G, LIMA1, ADAMTS2, ADAMTS14, SH3PXD2B, SERPINH1, TGM2, PRNP, JUN, KIRREL, GSN, ANXA2, LUM, CAV1, FN1, ISG15, DNM1, COL1A1, COL3A1, COL1A2, COL5A1, PALLD, ALDH1A2, COL5A2, XAF1, FERMT2, KCTD12B, DDR2	246	1355	20010	2.40122	0.00244443	3.35192e-05	3.0745e-05
	GOTERM_BP_FAT	GO:1901700~response to oxygen-containing compound	53	19.7761	5.68522e-07	SPON2, COL16A1, SPARC, IRS1, PTPRK, SOGA1, LOXL1, PTPRF, GHR, AKAP12, PDK4, SOX4, TGM2, DAPK1, SERPINF1, MMP2, ANXA5, KRT8, DNM1, COL4A1, COL6A2, ALDH1A2, COL6A1, LY6A, GAS6, DDR2, LRP1, SRC, GSTT1, THBS1, ADCY5, CNR1, NNAT, IGFBP7, NTRK2, PRNP, JUN, GSN, CAV2, CAV1, MTHFR, IGF1, SOD3, COL1A1, SDK1, COL3A1, MARCKS, COL1A2, COL5A2, ID3, AGRN, FBN1, FGF10	246	2101	20010	2.05193	0.00266905	3.61088e-05	3.31203e-05
	GOTERM_BP_FAT	GO:0090287~regulation of cellular response to growth factor stimulus	18	6.71642	5.84086e-07	MEG3, NRP1, LRP1, CAV2, FZD4, CAV1, HTRA1, ADAMTS12, FGF1, THBS1, FSTL1, PTPRF, ZEB2, BMPER, CREB3L1, FBN1, WNT4, FGF10	246	325	20010	4.50507	0.00274202	3.64333e-05	3.34179e-05
	GOTERM_BP_FAT	GO:1903034~regulation of response to wounding	15	5.59701	5.89134e-07	MUC16, LRP1, ANXA2, AHNAK, CAV1, ANXA5, PLAT, THBS1, PTPRF, PDPN, EMILIN2, CD34, FERMT2, DDR2, WNT4	246	220	20010	5.54601	0.00276569	3.64333e-05	3.34179e-05
	GOTERM_BP_FAT	GO:0031401~positive regulation of protein modification process	40	14.9254	6.25974e-07	NRP1, LRP1, CSF1, SRC, GM12248, FMR1, FGF1, THBS1, ADRA1A, AKAP12, GHR, BMPER, TIMP2, RSPO1, IGFBP6, SOX4, NTRK2, PRNP, JUN, ANXA2, IGFBP4, FZD4, CAV2, CAV1, CAVIN3, MMD2, IGF1, BMP3, ZEB2, MARCKS, ADRB3, FNDC1, ACKR3, AGRN, GAS6, FERMT2, JDP2, FGF10, FBN1, DDR2	246	1365	20010	2.38363	0.00293838	3.82088e-05	3.50464e-05
	GOTERM_BP_FAT	GO:0001935~endothelial cell proliferation	14	5.22388	6.60723e-07	ECM1, JUN, SPARC, CAV2, CAV1, IGF1, VASH1, THBS1, LOXL2, MMP14, BMPER, ALDH1A2, CD34, FGF10	246	190	20010	5.99358	0.00310124	3.98128e-05	3.65177e-05
	GOTERM_BP_FAT	GO:0043085~positive regulation of catalytic activity	37	13.806	6.72863e-07	CSF1, SRC, IRS1, NPR3, FGF1, THBS1, ADRA1A, ANTXR1, C9ORF72, SLC5A3, GHR, CASP12, TIMP2, IGFBP6, WNT4, TGM2, NTRK2, PRNP, GSN, IFI204, DAPK1, FZD4, CAV2, CAV1, ARHGAP29, MMD2, IGF1, MTSS2, ZEB2, MARCKS, ADRB3, AGRN, GAS6, FERMT2, FGF10, FBN1, DDR2	246	1208	20010	2.49142	0.00315813	4.00311e-05	3.67179e-05
	GOTERM_BP_FAT	GO:0051174~regulation of phosphorus metabolic process	49	18.2836	6.87605e-07	NRP1, CSF1, IRS1, FMR1, FGF1, ADRA1A, GHR, AKAP12, BMPER, PALM, PDK4, TIMP2, RSPO1, ANXA2, IGFBP4, MMD2, ZEB2, VCAN, ADRB3, FNDC1, GAS6, DDR2, TNXB, LRP1, SRC, GM12248, NPR3, THBS1, C9ORF72, SRPX2, IGFBP6, NTRK2, WWTR1, PRNP, JUN, KIRREL, FZD4, CAV2, CAV1, CAVIN3, FN1, IGF1, BMP3, MARCKS, ACKR3, AGRN, FERMT2, FBN1, FGF10	246	1878	20010	2.12233	0.00322721	4.03968e-05	3.70533e-05
	GOTERM_BP_FAT	GO:0001822~kidney development	19	7.08955	8.00586e-07	WWTR1, NRP1, SERPINF1, FGF1, NID1, PCSK5, BICC1, ADAMTS16, VCAN, BMPER, ADAMTS1, ALDH1A2, COL4A4, ID3, CD34, SOX4, FBN1, WNT4, FGF10	246	371	20010	4.16574	0.00375648	4.64538e-05	4.2609e-05
	GOTERM_BP_FAT	GO:0001932~regulation of protein phosphorylation	43	16.0448	8.21671e-07	NRP1, TNXB, LRP1, CSF1, SRC, GM12248, FMR1, FGF1, THBS1, ADRA1A, C9ORF72, AKAP12, GHR, BMPER, TIMP2, RSPO1, IGFBP6, NTRK2, WWTR1, PRNP, JUN, KIRREL, ANXA2, IGFBP4, FZD4, CAV2, CAV1, CAVIN3, FN1, MMD2, IGF1, BMP3, ZEB2, MARCKS, ADRB3, FNDC1, ACKR3, AGRN, GAS6, FERMT2, FGF10, FBN1, DDR2	246	1546	20010	2.26241	0.00385523	4.70958e-05	4.31978e-05
	GOTERM_BP_FAT	GO:0060348~bone development	16	5.97015	8.44185e-07	SPARC, ANXA2, SRC, IGF1, ADAMTS12, THBS1, DHRS3, GHR, COL1A1, MMP14, COL3A1, SH3PXD2B, OGN, SERPINH1, FBN1, TGM2	246	261	20010	4.98645	0.00396065	4.78032e-05	4.38467e-05
	GOTERM_BP_FAT	GO:0007178~transmembrane receptor protein serine/threonine kinase signaling pathway	20	7.46269	9.47152e-07	MEG3, WWTR1, JUN, LRP1, CAV2, SRC, CAV1, HTRA1, PTPRK, THBS1, FSTL1, BMP3, ZEB2, COL3A1, COL1A2, BMPER, CCN3, FERMT2, FBN1, FGF10	246	415	20010	3.92007	0.00444266	5.29954e-05	4.86092e-05
	GOTERM_BP_FAT	GO:0051128~regulation of cellular component organization	67	25	9.60804e-07	NRP1, COL16A1, SPARC, COL14A1, FMR1, ANTXR1, RND3, PCSK5, PTPRF, LAPTM4B, EFEMP1, ADAMTS1, PALM, SH3PXD2B, CCN3, RSPO1, TGM2, ANXA2, IGFBP4, SERPINF1, DNM1, ZEB2, MMP14, PALLD, PKP2, GAS6, JDP2, DDR2, TNXB, LRP1, AHNAK, SEMA3C, SRC, ARHGAP18, AEBP1, THBS2, C9ORF72, C2, ADAMTS16, LIMA1, SRPX2, FLRT2, PALMD, CNR1, PDPN, IGFBP7, MPDZ, GPC6, WNT4, NTRK2, PRNP, JUN, KIRREL, GSN, CAV2, CAV1, FN1, MTHFR…	246	3010	20010	1.81059	0.00450656	5.31268e-05	4.87297e-05
	GOTERM_BP_FAT	GO:0071495~cellular response to endogenous stimulus	41	15.2985	1.01606e-06	COL16A1, LRP1, SRC, IRS1, HTRA1, PTPRK, FGF1, ADAMTS12, THBS1, SOGA1, PTPRF, GHR, FLRT2, BMPER, CREB3L1, PDK4, IGFBP7, WNT4, TGM2, NTRK2, PRNP, JUN, CAV2, SERPINF1, CAV1, MMP2, ANXA5, IGF1, MTSS2, COL1A1, ZEB2, COL3A1, MARCKS, COL1A2, COL4A2, COL4A1, COL5A2, COL6A1, FERMT2, FGF10, FBN1	246	1447	20010	2.30477	0.00476513	5.55291e-05	5.09332e-05
	GOTERM_BP_FAT	GO:0035295~tube development	28	10.4478	1.11415e-06	MEG3, NRP1, SPARC, CSF1, SEMA3C, SRC, FGF1, PCSK5, ADAMTS16, ADAMTS2, BMPER, PDPN, SOX4, WNT4, TGM2, WWTR1, FZD2, FNDC3B, MTHFR, IGF1, ZEB2, VCAN, COL3A1, MARCKS, MMP14, COL4A1, ALDH1A2, FGF10	246	776	20010	2.935	0.00522391	6.01895e-05	5.52079e-05
	GOTERM_BP_FAT	GO:0071560~cellular response to transforming growth factor beta stimulus	16	5.97015	1.13092e-06	JUN, LRP1, CAV2, SRC, CAV1, HTRA1, PTPRK, THBS1, COL1A1, ZEB2, COL3A1, COL1A2, COL4A2, FERMT2, FBN1, WNT4	246	267	20010	4.87439	0.00530233	6.04011e-05	5.5402e-05
	GOTERM_BP_FAT	GO:0043408~regulation of MAPK cascade	28	10.4478	1.27903e-06	NRP1, TNXB, LRP1, SRC, FGF1, THBS1, ADRA1A, AKAP12, GHR, BMPER, TIMP2, IGFBP6, NTRK2, JUN, IGFBP4, FZD4, CAV2, CAV1, CAVIN3, FN1, IGF1, ZEB2, ADRB3, ACKR3, GAS6, FERMT2, FGF10, DDR2	246	782	20010	2.91248	0.00599468	6.75443e-05	6.19539e-05
	GOTERM_BP_FAT	GO:0042325~regulation of phosphorylation	45	16.791	1.41773e-06	NRP1, TNXB, LRP1, CSF1, SRC, IRS1, GM12248, FMR1, FGF1, THBS1, ADRA1A, C9ORF72, AKAP12, GHR, SRPX2, BMPER, TIMP2, RSPO1, IGFBP6, NTRK2, WWTR1, PRNP, JUN, KIRREL, ANXA2, IGFBP4, FZD4, CAV2, CAV1, CAVIN3, FN1, MMD2, IGF1, BMP3, ZEB2, MARCKS, ADRB3, FNDC1, ACKR3, AGRN, GAS6, FERMT2, FGF10, FBN1, DDR2	246	1693	20010	2.16206	0.0066426	7.23863e-05	6.63952e-05
	GOTERM_BP_FAT	GO:0071559~response to transforming growth factor beta	16	5.97015	1.4313e-06	JUN, LRP1, CAV2, SRC, CAV1, HTRA1, PTPRK, THBS1, COL1A1, ZEB2, COL3A1, COL1A2, COL4A2, FERMT2, FBN1, WNT4	246	272	20010	4.78479	0.00670595	7.23863e-05	6.63952e-05
	GOTERM_BP_FAT	GO:0070374~positive regulation of ERK1 and ERK2 cascade	15	5.59701	1.43213e-06	NRP1, JUN, LRP1, SRC, CAVIN3, IGF1, FGF1, ADRA1A, AKAP12, BMPER, ACKR3, GAS6, FERMT2, DDR2, FGF10	246	237	20010	5.14819	0.00670984	7.23863e-05	6.63952e-05
	GOTERM_BP_FAT	GO:0050673~epithelial cell proliferation	22	8.20896	1.43233e-06	RIAN, ECM1, JUN, SPARC, MUC16, CAV2, IGFBP4, CAV1, SERPINF1, HTRA1, IGF1, PTPRK, VASH1, FGF1, THBS1, LOXL2, MMP14, BMPER, ALDH1A2, CCN3, CD34, FGF10	246	511	20010	3.50198	0.00671075	7.23863e-05	6.63952e-05
	GOTERM_BP_FAT	GO:0019220~regulation of phosphate metabolic process	48	17.9104	1.54306e-06	NRP1, TNXB, LRP1, CSF1, SRC, IRS1, GM12248, FMR1, NPR3, FGF1, THBS1, ADRA1A, C9ORF72, AKAP12, GHR, SRPX2, BMPER, PALM, TIMP2, RSPO1, IGFBP6, NTRK2, WWTR1, PRNP, JUN, KIRREL, ANXA2, IGFBP4, FZD4, CAV2, CAV1, CAVIN3, FN1, MMD2, IGF1, BMP3, ZEB2, VCAN, MARCKS, ADRB3, FNDC1, ACKR3, AGRN, GAS6, FERMT2, FGF10, FBN1, DDR2	246	1873	20010	2.08456	0.00722767	7.70558e-05	7.06782e-05
	GOTERM_BP_FAT	GO:0009967~positive regulation of signal transduction	45	16.791	1.55751e-06	NRP1, LAMA2, LRP1, CSF1, SRC, IRS1, FGF1, NID1, THBS1, ADRA1A, PCSK5, AKAP12, GHR, BMPER, TIMP2, CCN3, RSPO1, IGFBP6, SOX4, TGM2, NTRK2, AFAP1L2, JUN, GSN, CMTM3, IGFBP4, FZD4, CAV2, CAV1, CAVIN3, FN1, LAMB1, MMD2, IGF1, COL1A1, BMP3, ZEB2, COL3A1, MARCKS, ADRB3, ACKR3, GAS6, FERMT2, FGF10, DDR2	246	1699	20010	2.15442	0.00729512	7.70558e-05	7.06782e-05
	GOTERM_BP_FAT	GO:0009968~negative regulation of signal transduction	38	14.1791	1.57421e-06	MEG3, NRP1, RIAN, ECM1, LRP1, SRC, IRS1, HTRA1, FAIM2, ADAMTS12, APCDD1, THBS1, ADRA1A, PTPRF, OAS1G, BMPER, CREB3L1, PALM, TIMP2, CCN3, WNT4, WWTR1, PRNP, FZD4, CAV2, CAV1, CAVIN3, ISG15, IGF1, BICC1, DHRS3, DNM1, MMP14, ACKR3, GAS6, RBMS3, FGF10, FBN1	246	1307	20010	2.36494	0.00737304	7.70706e-05	7.06918e-05
	GOTERM_BP_FAT	GO:0048699~generation of neurons	47	17.5373	1.80906e-06	MEG3, NRP1, LAMA2, LRP1, TENM4, CSF1, SEMA3C, FMR1, FAIM2, PTPRK, C9ORF72, PTPRF, EFEMP1, FLRT2, CNR1, ADAMTS1, PALM, TIMP2, EFHD1, MPDZ, SOX4, WNT4, TGM2, NTRK2, JUN, FZD2, ANXA2, SERPINF1, CAV1, MMP2, FN1, LAMB1, MMD2, IGF1, IGSF10, SDK1, ZEB2, COL3A1, MARCKS, PALLD, ALDH1A2, MYO5B, CDH11, ID3, LHX6, AGRN, GAS6	246	1825	20010	2.09482	0.00846832	8.70599e-05	7.98543e-05
	GOTERM_BP_FAT	GO:0001101~response to acid chemical	22	8.20896	1.81529e-06	NTRK2, GSN, SPARC, COL16A1, ANXA2, SRC, IRS1, MMP2, SERPINF1, KRT8, MTHFR, GSTT1, COL1A1, COL3A1, COL1A2, COL4A1, ALDH1A2, COL5A2, COL6A1, PDK4, ID3, IGFBP7	246	519	20010	3.448	0.00849739	8.70599e-05	7.98543e-05
	GOTERM_BP_FAT	GO:1901699~cellular response to nitrogen compound	29	10.8209	1.9668e-06	COL16A1, LRP1, SRC, IRS1, FMR1, THBS1, SOGA1, PTPRF, GHR, PDK4, TGM2, NTRK2, PRNP, JUN, CAV2, CAV1, MMP2, ANXA5, IGF1, COL1A1, COL3A1, MARCKS, COL1A2, COL4A1, COL5A2, COL6A1, LY6A, AGRN, FBN1	246	849	20010	2.77845	0.00920332	9.33733e-05	8.56452e-05
	GOTERM_BP_FAT	GO:0009605~response to external stimulus	68	25.3731	2.0227e-06	IFITM3, NRP1, SPON2, SPARC, CSF1, FMR1, PLAT, FGF1, ADRA1A, LOXL1, PTPRF, GHR, ADAMTS4, AKAP12, ADAMTS5, CASP12, PDK4, EMILIN2, CCN3, CD34, TGM2, ANXA2, SERPINF1, MMP2, ANXA5, KRT8, GBP11, MMP14, CCDC80, ADRB3, ALDH1A2, LY6A, GAS6, MEG3, LAMA2, LRP1, SEMA3C, SRC, HTRA1, GSTT1, ADAMTS12, THBS1, OAS1G, C2, FLRT2, CNR1, PDPN, WNT4, AOC3, JUN, GSN, MUC16, CMTM3, IFI204, CAV1, FN1, IFI44, MTHFR, ISG15…	246	3139	20010	1.7621	0.00946368	9.50671e-05	8.71988e-05
	GOTERM_BP_FAT	GO:0008219~cell death	55	20.5224	2.46827e-06	NRP1, CSF1, FMR1, FAIM2, PTPRF, GHR, AKAP12, CASP12, CREB3L1, PDK4, EMILIN2, CCN3, CD34, SOX4, TGM2, PEG3, DAPK1, SERPINF1, MMP2, ANXA5, KRT8, SLC6A13, FNDC1, ALDH1A2, GAS6, DDR2, LRP1, SRC, HTRA1, THBS1, FSTL1, NPAS2, DRAM1, CNR1, PDPN, SNCG, WNT4, NTRK2, PRNP, JUN, GSN, IFI204, CAV1, FN1, IGF1, BLCAP, GULP1, MARCKS, ID3, ACKR3, CD248, XAF1, AGRN, FERMT2, FGF10	246	2329	20010	1.9209	0.0115363	0.00011486	0.000105354
	GOTERM_BP_FAT	GO:0007229~integrin-mediated signaling pathway	11	4.10448	2.61671e-06	NRP1, ADAMTS14, COL3A1, LAMA2, SRC, FN1, ISG15, LAMB1, NID1, PCSK5, FERMT2	246	122	20010	7.33407	0.0122258	0.000120574	0.000110595
	GOTERM_BP_FAT	GO:0030155~regulation of cell adhesion	29	10.8209	2.68201e-06	NRP1, TNXB, COL16A1, LAMA2, LRP1, CSF1, SRC, NID1, THBS1, FBLN2, PCSK5, CD1D1, PDPN, EMILIN2, SOX4, WNT4, TGM2, PRNP, GSN, FZD4, CAV1, MMP2, FN1, LAMB1, IGF1, COL1A1, MMP14, CCDC80, FERMT2	246	863	20010	2.73337	0.012529	0.000122383	0.000112254
	GOTERM_BP_FAT	GO:0061041~regulation of wound healing	13	4.85075	2.95735e-06	MUC16, ANXA2, AHNAK, CAV1, ANXA5, PLAT, THBS1, PDPN, EMILIN2, CD34, FERMT2, DDR2, WNT4	246	184	20010	5.74695	0.0138063	0.000133649	0.000122588
	GOTERM_BP_FAT	GO:0010648~negative regulation of cell communication	40	14.9254	3.0901e-06	MEG3, NRP1, RIAN, ECM1, LRP1, SRC, IRS1, FMR1, HTRA1, FAIM2, ADAMTS12, APCDD1, THBS1, ADRA1A, PTPRF, OAS1G, BMPER, CREB3L1, PALM, TIMP2, CCN3, WNT4, WWTR1, PRNP, FZD4, CAV2, CAV1, CAVIN3, ANXA5, ISG15, IGF1, BICC1, DHRS3, DNM1, MMP14, ACKR3, GAS6, RBMS3, FGF10, FBN1	246	1457	20010	2.23312	0.0144216	0.000138319	0.000126871
	GOTERM_BP_FAT	GO:0023057~negative regulation of signaling	40	14.9254	3.29952e-06	MEG3, NRP1, RIAN, ECM1, LRP1, SRC, IRS1, FMR1, HTRA1, FAIM2, ADAMTS12, APCDD1, THBS1, ADRA1A, PTPRF, OAS1G, BMPER, CREB3L1, PALM, TIMP2, CCN3, WNT4, WWTR1, PRNP, FZD4, CAV2, CAV1, CAVIN3, ANXA5, ISG15, IGF1, BICC1, DHRS3, DNM1, MMP14, ACKR3, GAS6, RBMS3, FGF10, FBN1	246	1461	20010	2.22701	0.0153914	0.000145377	0.000133345
	GOTERM_BP_FAT	GO:0000165~MAPK cascade	28	10.4478	3.34058e-06	NRP1, TNXB, LRP1, SRC, FGF1, THBS1, ADRA1A, AKAP12, GHR, BMPER, TIMP2, IGFBP6, NTRK2, JUN, IGFBP4, FZD4, CAV2, CAV1, CAVIN3, FN1, IGF1, ZEB2, ADRB3, ACKR3, GAS6, FERMT2, FGF10, DDR2	246	823	20010	2.76739	0.0155814	0.000145377	0.000133345
	GOTERM_BP_FAT	GO:0023014~signal transduction by protein phosphorylation	28	10.4478	3.34058e-06	NRP1, TNXB, LRP1, SRC, FGF1, THBS1, ADRA1A, AKAP12, GHR, BMPER, TIMP2, IGFBP6, NTRK2, JUN, IGFBP4, FZD4, CAV2, CAV1, CAVIN3, FN1, IGF1, ZEB2, ADRB3, ACKR3, GAS6, FERMT2, FGF10, DDR2	246	823	20010	2.76739	0.0155814	0.000145377	0.000133345
	GOTERM_BP_FAT	GO:0050790~regulation of catalytic activity	49	18.2836	3.52075e-06	ECM1, CSF1, IRS1, FGF1, ADRA1A, ANTXR1, GHR, CASP12, PALM, TIMP2, TGM2, DAPK1, SERPINF1, MMD2, MTSS2, ZEB2, VCAN, ADRB3, GAS6, DDR2, ITIH5, TNXB, LRP1, SRC, NPR3, THBS1, C9ORF72, SLC5A3, OAS1G, CNR1, SERPINH1, IGFBP6, WNT4, AOC3, NTRK2, WWTR1, PRNP, GSN, IFI204, FZD4, CAV2, CAV1, ARHGAP29, IGF1, MARCKS, AGRN, FERMT2, FBN1, FGF10	246	1990	20010	2.00288	0.0164149	0.000151812	0.000139247
	GOTERM_BP_FAT	GO:0010631~epithelial cell migration	17	6.34328	3.93579e-06	NRP1, JUN, SPARC, SRC, IRS1, SERPINF1, IGF1, VASH1, FGF1, THBS1, FSTL1, LOXL2, ZEB2, SRPX2, BMPER, CCN3, FGF10	246	334	20010	4.14013	0.0183321	0.000167438	0.00015358
	GOTERM_BP_FAT	GO:0051216~cartilage development	14	5.22388	3.95438e-06	ECM1, LUM, ADAMTS12, THBS1, LOXL2, GHR, COL1A1, BMP3, COL3A1, EFEMP1, BMP1, CTSK, SERPINH1, CCN3	246	223	20010	5.10664	0.0184179	0.000167438	0.00015358
	GOTERM_BP_FAT	GO:0042127~regulation of cell proliferation	47	17.5373	4.02617e-06	IFITM3, MEG3, RIAN, ECM1, SPARC, CSF1, SRC, IRS1, NPR3, HTRA1, DPT, PTPRK, FGF1, THBS1, PTPRF, CD1D1, EFEMP1, ADAMTS1, PDPN, TIMP2, CCN3, RSPO1, SOX4, TGM2, NTRK2, WWTR1, PRNP, JUN, MUC16, ANXA2, CAV2, SERPINF1, CAV1, MMP2, FNDC3B, FN1, IGF1, VASH1, ALDH1A2, OGN, PKP2, ACKR3, CD248, GAS6, FERMT2, FGF10, DDR2	246	1880	20010	2.03354	0.0187491	0.000168955	0.000154971
	GOTERM_BP_FAT	GO:0051093~negative regulation of developmental process	36	13.4328	4.20367e-06	MEG3, NRP1, ECM1, SPARC, LRP1, SEMA3C, FMR1, THBS2, ADAMTS12, THBS1, LOXL2, EFEMP1, ADAMTS1, CTSK, CREB3L1, CCN3, WNT4, WWTR1, ANXA2, SERPINF1, CAV1, FNDC3B, IGF1, VASH1, COL3A1, COL4A2, COL5A1, ADRB3, COL5A2, PKP2, ID3, GAS6, FERMT2, JDP2, FGF10, FBN1	246	1253	20010	2.33703	0.0195675	0.000174843	0.000160372
	GOTERM_BP_FAT	GO:0090132~epithelium migration	17	6.34328	4.4059e-06	NRP1, JUN, SPARC, SRC, IRS1, SERPINF1, IGF1, VASH1, FGF1, THBS1, FSTL1, LOXL2, ZEB2, SRPX2, BMPER, CCN3, FGF10	246	337	20010	4.10328	0.0204992	0.000181647	0.000166613
	GOTERM_BP_FAT	GO:0070372~regulation of ERK1 and ERK2 cascade	17	6.34328	4.75887e-06	NRP1, JUN, LRP1, SRC, CAV1, CAVIN3, FN1, IGF1, FGF1, ADRA1A, AKAP12, BMPER, ACKR3, GAS6, FERMT2, DDR2, FGF10	246	339	20010	4.07907	0.0221231	0.000194493	0.000178396
	GOTERM_BP_FAT	GO:0048589~developmental growth	28	10.4478	5.19288e-06	MEG3, NRP1, ECM1, LRP1, TENM4, CSF1, SEMA3C, COL14A1, FGF1, THBS1, ADRA1A, C9ORF72, GHR, SH3PXD2B, CCN3, PTGFRN, WWTR1, GSN, FN1, IGF1, IGSF10, ZEB2, COL3A1, ADRB3, MYO5B, AGRN, FGF10, DDR2	246	843	20010	2.70173	0.0241162	0.000210401	0.000192987
	GOTERM_BP_FAT	GO:0090130~tissue migration	17	6.34328	5.48268e-06	NRP1, JUN, SPARC, SRC, IRS1, SERPINF1, IGF1, VASH1, FGF1, THBS1, FSTL1, LOXL2, ZEB2, SRPX2, BMPER, CCN3, FGF10	246	343	20010	4.0315	0.0254448	0.000220244	0.000202016
	GOTERM_BP_FAT	GO:0048146~positive regulation of fibroblast proliferation	9	3.35821	5.55729e-06	JUN, ANXA2, FNDC3B, FN1, CD248, IGF1, GAS6, FGF10, DDR2	246	79	20010	9.26675	0.0257866	0.00022135	0.000203029
	GOTERM_BP_FAT	GO:0033674~positive regulation of kinase activity	21	7.83582	5.65296e-06	NTRK2, PRNP, CSF1, SRC, IRS1, FZD4, MMD2, IGF1, FGF1, THBS1, ADRA1A, GHR, ZEB2, MARCKS, IGFBP6, AGRN, GAS6, FERMT2, FBN1, DDR2, FGF10	246	513	20010	3.32977	0.0262247	0.000222036	0.000203659
	GOTERM_BP_FAT	GO:0007179~transforming growth factor beta receptor signaling pathway	13	4.85075	5.66899e-06	JUN, LRP1, CAV2, SRC, CAV1, HTRA1, PTPRK, THBS1, ZEB2, COL3A1, COL1A2, FERMT2, FBN1	246	196	20010	5.3951	0.026298	0.000222036	0.000203659
	GOTERM_BP_FAT	GO:0033002~muscle cell proliferation	15	5.59701	5.75999e-06	JUN, TENM4, CAV2, SRC, CAV1, MMP2, NPR3, IGF1, FGF1, THBS1, ADAMTS1, OGN, CCN3, DDR2, TGM2	246	267	20010	4.56975	0.0267145	0.000223735	0.000205217
	GOTERM_BP_FAT	GO:0044093~positive regulation of molecular function	42	15.6716	6.04365e-06	SPON1, LRP1, CSF1, SRC, IRS1, FMR1, NPR3, FGF1, THBS1, ADRA1A, ANTXR1, C9ORF72, SLC5A3, GHR, CASP12, TIMP2, IGFBP6, WNT4, TGM2, NTRK2, PRNP, GSN, FZD2, IFI204, ANXA2, DAPK1, FZD4, CAV2, CAV1, ARHGAP29, MMD2, IGF1, MTSS2, ZEB2, MARCKS, ADRB3, AGRN, GAS6, FERMT2, FGF10, FBN1, DDR2	246	1614	20010	2.11669	0.0280115	0.000232829	0.000213559
	GOTERM_BP_FAT	GO:1901698~response to nitrogen compound	36	13.4328	6.36686e-06	SPARC, COL16A1, LRP1, SRC, IRS1, FMR1, THBS1, SOGA1, PTPRF, GHR, CNR1, PDK4, TGM2, NTRK2, PRNP, JUN, GSN, CAV2, SERPINF1, CAV1, MMP2, ANXA5, MTHFR, IGF1, DNM1, COL1A1, SDK1, COL3A1, MARCKS, COL1A2, COL4A1, COL5A2, COL6A1, LY6A, AGRN, FBN1	246	1277	20010	2.2931	0.0294872	0.000243287	0.000223151
	GOTERM_BP_FAT	GO:0002009~morphogenesis of an epithelium	23	8.58209	6.424e-06	MEG3, NRP1, FZD2, CSF1, SEMA3C, SRC, MMP2, MTHFR, IGF1, ADAMTS12, FGF1, ADAMTS16, ZEB2, MMP14, COL5A1, COL4A1, ALDH1A2, PDPN, SOX4, FERMT2, WNT4, FGF10, TGM2	246	609	20010	3.07201	0.0297479	0.00024349	0.000223338
	GOTERM_BP_FAT	GO:0045785~positive regulation of cell adhesion	21	7.83582	6.53805e-06	NRP1, COL16A1, LAMA2, CSF1, SRC, CAV1, FN1, LAMB1, IGF1, NID1, THBS1, FBLN2, PCSK5, CD1D1, CCDC80, PDPN, EMILIN2, SOX4, FERMT2, WNT4, TGM2	246	518	20010	3.29763	0.0302679	0.000245831	0.000225484
	GOTERM_BP_FAT	GO:1901701~cellular response to oxygen-containing compound	39	14.5522	7.43839e-06	SPON2, COL16A1, LRP1, SRC, IRS1, PTPRK, THBS1, SOGA1, PTPRF, ADCY5, GHR, PDK4, SOX4, TGM2, NTRK2, PRNP, JUN, DAPK1, CAV2, SERPINF1, CAV1, MMP2, ANXA5, IGF1, SOD3, COL1A1, COL3A1, MARCKS, COL1A2, COL4A1, ALDH1A2, COL5A2, COL6A1, ID3, LY6A, AGRN, GAS6, FBN1, DDR2	246	1455	20010	2.18029	0.0343637	0.000276836	0.000253923
	GOTERM_BP_FAT	GO:0071417~cellular response to organonitrogen compound	25	9.32836	7.48046e-06	COL16A1, LRP1, SRC, IRS1, SOGA1, PTPRF, GHR, PDK4, TGM2, NTRK2, PRNP, JUN, CAV2, CAV1, MMP2, ANXA5, IGF1, COL1A1, COL3A1, MARCKS, COL1A2, COL4A1, COL5A2, COL6A1, FBN1	246	711	20010	2.86011	0.0345546	0.000276836	0.000253923
	GOTERM_BP_FAT	GO:0032101~regulation of response to external stimulus	29	10.8209	7.62461e-06	NRP1, LRP1, CSF1, SEMA3C, HTRA1, PLAT, FGF1, ADAMTS12, THBS1, PTPRF, CASP12, CNR1, PDPN, EMILIN2, CCN3, CD34, WNT4, TGM2, AOC3, MUC16, ANXA2, SERPINF1, CAV1, ANXA5, FN1, AGRN, GAS6, FGF10, FBN1	246	912	20010	2.58652	0.0352087	0.000279966	0.000256795
	GOTERM_BP_FAT	GO:0051130~positive regulation of cellular component organization	41	15.2985	7.68467e-06	NRP1, TNXB, COL16A1, LRP1, AHNAK, SRC, FMR1, THBS2, PCSK5, PTPRF, C2, EFEMP1, SRPX2, FLRT2, CNR1, ADAMTS1, PDPN, SH3PXD2B, PALM, WNT4, NTRK2, PRNP, JUN, KIRREL, GSN, ANXA2, SERPINF1, CAV1, FN1, ISG15, IGF1, DNM1, ZEB2, MARCKS, PALLD, MYO5B, AGRN, GAS6, FERMT2, JDP2, DDR2	246	1572	20010	2.1215	0.035481	0.000279984	0.000256811
	GOTERM_BP_FAT	GO:0010941~regulation of cell death	47	17.5373	8.14533e-06	NRP1, LRP1, CSF1, SRC, FMR1, HTRA1, FAIM2, THBS1, FSTL1, PTPRF, NPAS2, AKAP12, GHR, CASP12, CNR1, CREB3L1, PDPN, PDK4, SNCG, EMILIN2, CCN3, CD34, SOX4, WNT4, TGM2, NTRK2, PRNP, JUN, GSN, DAPK1, SERPINF1, CAV1, MMP2, ANXA5, SLC6A13, FN1, IGF1, FNDC1, ALDH1A2, ID3, ACKR3, CD248, AGRN, GAS6, FERMT2, FGF10, DDR2	246	1931	20010	1.97983	0.0375675	0.000294485	0.000270112
	GOTERM_BP_FAT	GO:0045860~positive regulation of protein kinase activity	19	7.08955	9.03463e-06	PRNP, CSF1, SRC, FZD4, MMD2, IGF1, FGF1, THBS1, ADRA1A, GHR, ZEB2, MARCKS, IGFBP6, AGRN, GAS6, FERMT2, FBN1, DDR2, FGF10	246	441	20010	3.50451	0.0415827	0.000324143	0.000297315
	GOTERM_BP_FAT	GO:0023056~positive regulation of signaling	49	18.2836	9.47126e-06	NRP1, CSF1, IRS1, FMR1, FGF1, ADRA1A, PCSK5, GHR, AKAP12, BMPER, TIMP2, CCN3, RSPO1, SOX4, TGM2, ANXA2, IGFBP4, MMD2, ZEB2, ADRB3, GAS6, DDR2, LAMA2, LRP1, SRC, NID1, THBS1, NNAT, IGFBP6, NTRK2, PRNP, AFAP1L2, JUN, GSN, CMTM3, FZD4, CAV2, CAV1, CAVIN3, FN1, LAMB1, IGF1, COL1A1, BMP3, COL3A1, MARCKS, ACKR3, FERMT2, FGF10	246	2064	20010	1.93107	0.0435479	0.000336369	0.000308529
	GOTERM_BP_FAT	GO:0032268~regulation of cellular protein metabolic process	62	23.1343	9.51852e-06	NRP1, SPON1, ECM1, CSF1, FMR1, PLAT, FGF1, ADRA1A, ANTXR1, GHR, AKAP12, LAPTM4B, CASP12, BMPER, TIMP2, RSPO1, SOX4, ANXA2, DAPK1, IGFBP4, SERPINF1, MMD2, ZEB2, VCAN, MMP14, ADRB3, FNDC1, GAS6, JDP2, DDR2, RBMS3, ITIH5, TNXB, LRP1, SRC, GM12248, THBS1, C9ORF72, SERPINH1, IGFBP6, NTRK2, WWTR1, PRNP, JUN, KIRREL, GSN, IFI204, FZD4, CAV2, CAV1, CAVIN3, FN1, MTHFR, ISG15, IGF1, BMP3, MARCKS, ACKR3, AG…	246	2887	20010	1.74686	0.0437604	0.000336369	0.000308529
	GOTERM_BP_FAT	GO:0034097~response to cytokine	34	12.6866	9.81459e-06	IFITM3, ECM1, SPARC, CSF1, SRC, FMR1, ADAMTS12, THBS1, PTPRF, OAS1G, AKAP12, GHR, TIMP2, JUN, GSN, IFI204, DAPK1, FZD4, CAV1, KRT8, FN1, MTHFR, ISG15, PCOLCE, IIGP1, COL1A1, F830016B08RIK, GBP11, COL3A1, ALDH1A2, ACKR3, GM4951, XAF1, GAS6	246	1192	20010	2.32014	0.0450904	0.000344243	0.000315751
	GOTERM_BP_FAT	GO:0048468~cell development	59	22.0149	9.98694e-06	NRP1, ECM1, TENM4, CSF1, COL14A1, FMR1, PTPRK, ADRA1A, ANTXR1, PTPRF, EFEMP1, ADAMTS1, PALM, TIMP2, EFHD1, SOX4, TGM2, ANXA2, SERPINF1, MMP2, KRT8, FNDC3B, MMD2, ZEB2, PALLD, ALDH1A2, CDH11, MEG3, LAMA2, LRP1, SEMA3C, SRC, C9ORF72, FLRT2, CNR1, PDPN, SERPINH1, MPDZ, WNT4, NTRK2, JUN, GSN, FZD2, FZD4, CAV2, CAV1, FN1, LAMB1, IGF1, IGSF10, SDK1, COL3A1, KRT19, MARCKS, MYO5B, LHX6, AGRN, FERMT2, FBN1	246	2697	20010	1.77944	0.0458638	0.000346986	0.000318267
	GOTERM_BP_FAT	GO:0038063~collagen-activated tyrosine kinase receptor signaling pathway	5	1.86567	1.0049e-05	COL1A1, COL4A2, COL4A1, COL4A5, DDR2	246	12	20010	33.8923	0.0461421	0.000346986	0.000318267
	GOTERM_BP_FAT	GO:0031399~regulation of protein modification process	48	17.9104	1.01187e-05	NRP1, TNXB, LRP1, CSF1, SRC, GM12248, FMR1, FGF1, THBS1, ADRA1A, C9ORF72, AKAP12, GHR, BMPER, TIMP2, RSPO1, IGFBP6, SOX4, NTRK2, WWTR1, PRNP, JUN, KIRREL, ANXA2, IGFBP4, FZD4, CAV2, CAV1, CAVIN3, FN1, MTHFR, ISG15, MMD2, IGF1, BMP3, ZEB2, VCAN, MARCKS, ADRB3, FNDC1, ACKR3, AGRN, GAS6, FERMT2, JDP2, FGF10, FBN1, DDR2	246	2008	20010	1.94442	0.0464545	0.000346986	0.000318267
	GOTERM_BP_FAT	GO:0010811~positive regulation of cell-substrate adhesion	11	4.10448	1.01881e-05	NRP1, CCDC80, COL16A1, CSF1, FN1, NID1, THBS1, FBLN2, PCSK5, FERMT2, WNT4	246	142	20010	6.3011	0.0467656	0.000346986	0.000318267
	GOTERM_BP_FAT	GO:0048729~tissue morphogenesis	25	9.32836	1.07002e-05	MEG3, NRP1, CSF1, SEMA3C, SRC, FGF1, ADAMTS12, ADAMTS16, PDPN, SOX4, WNT4, TGM2, FZD2, MMP2, MTHFR, IGF1, ZEB2, COL3A1, MMP14, COL5A1, COL4A1, ALDH1A2, PKP2, FERMT2, FGF10	246	726	20010	2.80101	0.0490579	0.000361807	0.000331862
	GOTERM_BP_FAT	GO:0048144~fibroblast proliferation	11	4.10448	1.0838e-05	COL3A1, JUN, ANXA2, CAV1, FNDC3B, FN1, CD248, IGF1, GAS6, FGF10, DDR2	246	143	20010	6.25704	0.0496733	0.000363846	0.000333732
	GOTERM_BP_FAT	GO:0040007~growth	32	11.9403	1.37406e-05	MEG3, NRP1, ECM1, LRP1, TENM4, CSF1, SEMA3C, COL14A1, SRC, FGF1, THBS1, ADRA1A, C9ORF72, GHR, SH3PXD2B, CCN3, IGFBP7, PTGFRN, WWTR1, GSN, IGFBP4, FN1, IGF1, IGSF10, ZEB2, COL3A1, MMP14, ADRB3, MYO5B, AGRN, FGF10, DDR2	246	1102	20010	2.362	0.0625529	0.00045667	0.000418873
	GOTERM_BP_FAT	GO:0042476~odontogenesis	11	4.10448	1.38081e-05	COL1A1, ADAMTS5, CSF1, SRC, HTRA1, ID3, LAMB1, AQP5, APCDD1, CD34, FGF10	246	147	20010	6.08678	0.0628503	0.00045667	0.000418873
	GOTERM_BP_FAT	GO:0010243~response to organonitrogen compound	32	11.9403	1.39834e-05	SPARC, COL16A1, LRP1, SRC, IRS1, SOGA1, PTPRF, GHR, CNR1, PDK4, TGM2, NTRK2, PRNP, JUN, GSN, CAV2, SERPINF1, CAV1, MMP2, ANXA5, MTHFR, IGF1, DNM1, COL1A1, SDK1, COL3A1, MARCKS, COL1A2, COL4A1, COL5A2, COL6A1, FBN1	246	1103	20010	2.35986	0.0636222	0.00045667	0.000418873
	GOTERM_BP_FAT	GO:0007423~sensory organ development	24	8.95522	1.39916e-05	NTRK2, NRP1, JUN, FZD2, SPARC, IFI204, FZD4, SERPINF1, IGF1, AQP5, MFAP5, SDK1, ZEB2, RCN1, EFEMP1, BMPER, COL5A1, COL4A1, ALDH1A2, COL5A2, SH3PXD2B, IGFBP7, FBN1, FGF10	246	689	20010	2.83337	0.0636584	0.00045667	0.000418873
	GOTERM_BP_FAT	GO:0008285~negative regulation of cell proliferation	26	9.70149	1.4561e-05	IFITM3, MEG3, RIAN, SPARC, NPR3, DPT, PTPRK, THBS1, PTPRF, PDPN, TIMP2, CCN3, SOX4, PRNP, JUN, MUC16, CAV2, SERPINF1, CAV1, IGF1, VASH1, ALDH1A2, OGN, PKP2, ACKR3, FGF10	246	790	20010	2.67706	0.0661613	0.000471976	0.000432912
	GOTERM_BP_FAT	GO:0060429~epithelium development	37	13.806	1.72803e-05	MEG3, NRP1, CSF1, SEMA3C, SRC, FGF1, ADAMTS12, APCDD1, FSTL1, ADAMTS16, BMPER, PDPN, CD34, SOX4, WNT4, TGM2, WWTR1, JUN, FZD2, CAV1, MMP2, FNDC3B, KRT8, MTHFR, IGF1, ZEB2, VCAN, KRT19, MARCKS, MMP14, COL5A1, PALLD, COL4A1, ALDH1A2, ID3, FERMT2, FGF10	246	1395	20010	2.15744	0.0780234	0.000553309	0.000507513
	GOTERM_BP_FAT	GO:0035987~endodermal cell differentiation	7	2.61194	1.73056e-05	MMP14, COL4A2, COL5A1, MMP2, COL5A2, COL6A1, FN1	246	45	20010	12.6531	0.0781331	0.000553309	0.000507513
	GOTERM_BP_FAT	GO:0071229~cellular response to acid chemical	16	5.97015	1.82142e-05	NTRK2, COL16A1, ANXA2, SRC, IRS1, MMP2, SERPINF1, COL1A1, COL3A1, COL1A2, COL4A1, ALDH1A2, COL5A2, COL6A1, PDK4, ID3	246	336	20010	3.8734	0.0820622	0.000570853	0.000523606
	GOTERM_BP_FAT	GO:0070371~ERK1 and ERK2 cascade	16	5.97015	1.82142e-05	NRP1, JUN, LRP1, SRC, CAV1, CAVIN3, IGF1, FGF1, ADRA1A, AKAP12, BMPER, ACKR3, GAS6, FERMT2, DDR2, FGF10	246	336	20010	3.8734	0.0820622	0.000570853	0.000523606
	GOTERM_BP_FAT	GO:0001649~osteoblast differentiation	13	4.85075	1.82187e-05	IFITM3, WWTR1, IFI204, FNDC3B, IGF1, COL1A1, BMP3, CREB3L1, SH3PXD2B, ID3, FERMT2, DDR2, WNT4	246	220	20010	4.80654	0.0820817	0.000570853	0.000523606
	GOTERM_BP_FAT	GO:0090288~negative regulation of cellular response to growth factor stimulus	12	4.47761	1.83645e-05	MEG3, LRP1, BMPER, CAV2, CAV1, CREB3L1, HTRA1, ADAMTS12, THBS1, PTPRF, WNT4, FBN1	246	185	20010	5.2762	0.0827109	0.000571584	0.000524276
	GOTERM_BP_FAT	GO:0022612~gland morphogenesis	11	4.10448	1.84853e-05	NRP1, CSF1, SEMA3C, SRC, CAV1, MMP2, IGF1, FGF1, WNT4, FGF10, TGM2	246	152	20010	5.88655	0.0832313	0.000571584	0.000524276
	GOTERM_BP_FAT	GO:0010647~positive regulation of cell communication	48	17.9104	1.86761e-05	NRP1, LAMA2, LRP1, CSF1, SRC, IRS1, FMR1, FGF1, NID1, THBS1, ADRA1A, PCSK5, AKAP12, GHR, BMPER, NNAT, TIMP2, CCN3, RSPO1, IGFBP6, SOX4, TGM2, NTRK2, PRNP, AFAP1L2, JUN, GSN, CMTM3, IGFBP4, FZD4, CAV2, CAV1, CAVIN3, FN1, LAMB1, MMD2, IGF1, COL1A1, BMP3, ZEB2, COL3A1, MARCKS, ADRB3, ACKR3, GAS6, FERMT2, FGF10, DDR2	246	2056	20010	1.89902	0.0840534	0.000573554	0.000526083
	GOTERM_BP_FAT	GO:0060284~regulation of cell development	33	12.3134	1.87931e-05	MEG3, NRP1, LRP1, TENM4, CSF1, SEMA3C, COL14A1, FMR1, PTPRF, EFEMP1, FLRT2, CNR1, ADAMTS1, PDPN, PALM, TIMP2, TGM2, NTRK2, ANXA2, SERPINF1, CAV1, FN1, MMD2, IGF1, IGSF10, SDK1, ZEB2, COL3A1, MARCKS, MYO5B, AGRN, FERMT2, FBN1	246	1175	20010	2.28448	0.0845568	0.000573554	0.000526083
	GOTERM_BP_FAT	GO:1901342~regulation of vasculature development	17	6.34328	1.92144e-05	MEG3, NRP1, ECM1, SPARC, SERPINF1, VASH1, THBS2, FGF1, THBS1, SRPX2, BMPER, COL4A2, ADAMTS1, CREB3L1, EMILIN2, CD34, WNT4	246	379	20010	3.64856	0.0863683	0.00058263	0.000534408
	GOTERM_BP_FAT	GO:0006468~protein phosphorylation	47	17.5373	2.05391e-05	NRP1, TNXB, LRP1, CSF1, SRC, GM12248, FMR1, FGF1, THBS1, ADRA1A, C9ORF72, AKAP12, GHR, EFEMP1, BMPER, PDK4, TIMP2, RSPO1, IGFBP6, NTRK2, WWTR1, PRNP, JUN, KIRREL, ANXA2, DAPK1, IGFBP4, FZD4, CAV2, CAV1, CAVIN3, FN1, HUNK, MMD2, IGF1, BMP3, ZEB2, MARCKS, ADRB3, FNDC1, ACKR3, AGRN, GAS6, FERMT2, FGF10, FBN1, DDR2	246	2002	20010	1.90961	0.0920404	0.000618807	0.000567591
	GOTERM_BP_FAT	GO:0016485~protein processing	15	5.59701	2.13481e-05	SPON1, C1RA, GSN, IFI204, SRC, FMR1, PLAT, CPZ, THBS1, PCSK5, MMP14, ADAMTS2, CASP12, BMP1, CPXM1	246	300	20010	4.06707	0.0954871	0.000628942	0.000576887
	GOTERM_BP_FAT	GO:0007045~cell-substrate adherens junction assembly	8	2.98507	2.14108e-05	NRP1, MMP14, COL16A1, LRP1, SRC, PTPRK, FERMT2, WNT4	246	69	20010	9.43089	0.0957534	0.000628942	0.000576887
	GOTERM_BP_FAT	GO:0048041~focal adhesion assembly	8	2.98507	2.14108e-05	NRP1, MMP14, COL16A1, LRP1, SRC, PTPRK, FERMT2, WNT4	246	69	20010	9.43089	0.0957534	0.000628942	0.000576887
	GOTERM_BP_FAT	GO:0008347~glial cell migration	8	2.98507	2.14108e-05	COL3A1, VCAN, MMP14, CSF1, LRP1, FN1, LAMB1, APCDD1	246	69	20010	9.43089	0.0957534	0.000628942	0.000576887
	GOTERM_BP_FAT	GO:0010942~positive regulation of cell death	25	9.32836	2.16001e-05	LRP1, SRC, HTRA1, THBS1, PTPRF, AKAP12, CASP12, CNR1, EMILIN2, SOX4, TGM2, PRNP, JUN, GSN, DAPK1, CAV1, MMP2, ANXA5, SLC6A13, FNDC1, ALDH1A2, ID3, CD248, AGRN, DDR2	246	758	20010	2.68277	0.0965578	0.000630562	0.000578373
	GOTERM_BP_FAT	GO:0006508~proteolysis	44	16.4179	2.21752e-05	ITIH5, SPON1, ECM1, SRC, FMR1, HTRA1, PLAT, AEBP1, ADAMTS12, CPZ, THBS1, ANTXR1, PRSS23, PCSK5, C2, ADAMTS4, ADAMTS16, ADAMTS5, ADAMTS15, ADAMTS2, CASP12, C1S1, SCRN1, ADAMTS1, CTSK, TIMP2, SERPINH1, CPXM1, TGM2, WWTR1, C1RA, GSN, IFI204, DAPK1, SERPINF1, CAV1, MMP2, ISG15, PCOLCE, IGF1, VASH1, MMP14, BMP1, GAS6	246	1825	20010	1.96111	0.0989972	0.000643356	0.000590108
	GOTERM_BP_FAT	GO:0045765~regulation of angiogenesis	16	5.97015	2.24235e-05	MEG3, NRP1, ECM1, SPARC, SERPINF1, VASH1, THBS2, FGF1, THBS1, SRPX2, BMPER, COL4A2, ADAMTS1, CREB3L1, EMILIN2, CD34	246	342	20010	3.80545	0.100048	0.000646567	0.000593054
	GOTERM_BP_FAT	GO:0030278~regulation of ossification	14	5.22388	2.51501e-05	IFITM3, WWTR1, ECM1, IFI204, CSF1, FNDC3B, ISG15, IGF1, DHRS3, CREB3L1, ID3, FERMT2, DDR2, WNT4	246	265	20010	4.29728	0.11151	0.000720765	0.000661111
	GOTERM_BP_FAT	GO:0048145~regulation of fibroblast proliferation	10	3.73134	2.53422e-05	JUN, ANXA2, CAV1, FNDC3B, FN1, CD248, IGF1, GAS6, FGF10, DDR2	246	126	20010	6.45567	0.112312	0.000721869	0.000662123
	GOTERM_BP_FAT	GO:0051960~regulation of nervous system development	32	11.9403	2.73316e-05	NRP1, LRP1, TENM4, CSF1, SEMA3C, FMR1, THBS2, PTPRF, EFEMP1, SRPX2, FLRT2, CNR1, ADAMTS1, PALM, TIMP2, GPC6, TGM2, NTRK2, FZD2, ANXA2, SERPINF1, CAV1, FN1, MMD2, IGF1, IGSF10, SDK1, ZEB2, COL3A1, MARCKS, MYO5B, AGRN	246	1142	20010	2.27927	0.120576	0.00077273	0.000708774
	GOTERM_BP_FAT	GO:0007044~cell-substrate junction assembly	9	3.35821	2.74566e-05	NRP1, MMP14, COL16A1, LRP1, SRC, FN1, PTPRK, FERMT2, WNT4	246	98	20010	7.47013	0.121092	0.00077273	0.000708774
	GOTERM_BP_FAT	GO:0051604~protein maturation	16	5.97015	3.03376e-05	SPON1, C1RA, GSN, IFI204, SRC, FMR1, PLAT, CPZ, THBS1, PCSK5, MMP14, ADAMTS2, CASP12, BMP1, SERPINH1, CPXM1	246	351	20010	3.70787	0.132916	0.000848732	0.000778486
	GOTERM_BP_FAT	GO:0048659~smooth muscle cell proliferation	12	4.47761	3.28413e-05	JUN, ADAMTS1, SRC, CAV1, MMP2, NPR3, OGN, CCN3, IGF1, THBS1, DDR2, TGM2	246	197	20010	4.95481	0.143062	0.000913338	0.000837744
	GOTERM_BP_FAT	GO:0001952~regulation of cell-matrix adhesion	10	3.73134	3.45091e-05	NRP1, MMP14, COL16A1, CSF1, LRP1, SRC, THBS1, PCSK5, FERMT2, WNT4	246	131	20010	6.20927	0.149754	0.000954074	0.000875109
	GOTERM_BP_FAT	GO:0038065~collagen-activated signaling pathway	5	1.86567	3.55488e-05	COL1A1, COL4A2, COL4A1, COL4A5, DDR2	246	16	20010	25.4192	0.1539	0.000972516	0.000892025
	GOTERM_BP_FAT	GO:0051246~regulation of protein metabolic process	63	23.5075	3.559e-05	NRP1, SPON1, ECM1, CSF1, FMR1, PLAT, FGF1, ADRA1A, ANTXR1, GHR, AKAP12, LAPTM4B, CASP12, BMPER, TIMP2, RSPO1, SOX4, ANXA2, DAPK1, IGFBP4, SERPINF1, SLC2A13, MMD2, ZEB2, VCAN, MMP14, ADRB3, FNDC1, GAS6, JDP2, DDR2, RBMS3, ITIH5, TNXB, LRP1, SRC, GM12248, THBS1, C9ORF72, SERPINH1, IGFBP6, NTRK2, WWTR1, PRNP, JUN, KIRREL, GSN, IFI204, FZD4, CAV2, CAV1, CAVIN3, FN1, MTHFR, ISG15, IGF1, BMP3, MARCKS, …	246	3080	20010	1.6638	0.154064	0.000972516	0.000892025
	GOTERM_BP_FAT	GO:0030182~neuron differentiation	40	14.9254	3.64507e-05	MEG3, NRP1, LAMA2, LRP1, TENM4, SEMA3C, FMR1, FAIM2, PTPRK, C9ORF72, PTPRF, EFEMP1, FLRT2, CNR1, ADAMTS1, PALM, TIMP2, EFHD1, MPDZ, SOX4, WNT4, NTRK2, JUN, FZD2, SERPINF1, CAV1, MMP2, FN1, LAMB1, MMD2, SDK1, ZEB2, MARCKS, PALLD, ALDH1A2, MYO5B, CDH11, ID3, LHX6, AGRN	246	1622	20010	2.00595	0.15748	0.000984166	0.000902711
	GOTERM_BP_FAT	GO:0034332~adherens junction organization	10	3.73134	3.66445e-05	NRP1, MMP14, COL16A1, LRP1, SRC, CDH11, PKP2, PTPRK, FERMT2, WNT4	246	132	20010	6.16223	0.158247	0.000984166	0.000902711
	GOTERM_BP_FAT	GO:2000181~negative regulation of blood vessel morphogenesis	10	3.73134	3.66445e-05	MEG3, SPARC, COL4A2, ADAMTS1, CREB3L1, SERPINF1, VASH1, THBS2, THBS1, WNT4	246	132	20010	6.16223	0.158247	0.000984166	0.000902711
	GOTERM_BP_FAT	GO:0048762~mesenchymal cell differentiation	13	4.85075	3.92541e-05	WWTR1, NRP1, RIAN, SEMA3C, FN1, LOXL2, COL1A1, ZEB2, ALDH1A2, PDPN, FERMT2, WNT4, FGF10	246	238	20010	4.44302	0.168511	0.00104826	0.000961501
	GOTERM_BP_FAT	GO:1901888~regulation of cell junction assembly	9	3.35821	4.21994e-05	NRP1, MMP14, COL16A1, LRP1, SRC, CAV1, PKP2, FERMT2, WNT4	246	104	20010	7.03917	0.179945	0.00112055	0.00102781
	GOTERM_BP_FAT	GO:0035239~tube morphogenesis	18	6.71642	4.40827e-05	MEG3, NRP1, FZD2, CSF1, SRC, MTHFR, IGF1, FGF1, ADAMTS16, ZEB2, MMP14, COL4A1, ALDH1A2, PDPN, SOX4, WNT4, FGF10, TGM2	246	451	20010	3.24644	0.187173	0.00116398	0.00106764
	GOTERM_BP_FAT	GO:0051962~positive regulation of nervous system development	23	8.58209	4.64198e-05	NTRK2, NRP1, LRP1, CSF1, TENM4, FMR1, SERPINF1, FN1, MMD2, IGF1, THBS2, PTPRF, ZEB2, MARCKS, SRPX2, FLRT2, CNR1, ADAMTS1, MYO5B, PALM, TIMP2, AGRN, TGM2	246	693	20010	2.69964	0.196055	0.00121884	0.00111796
	GOTERM_BP_FAT	GO:0071711~basement membrane organization	6	2.23881	4.73776e-05	COL3A1, FLRT2, CAV2, COL4A1, CAV1, LAMB1	246	33	20010	14.7894	0.199667	0.00123708	0.00113469
	GOTERM_BP_FAT	GO:0016055~Wnt signaling pathway	18	6.71642	4.78474e-05	WWTR1, FZD2, LRP1, SRC, FZD4, CAV1, APCDD1, CPZ, BICC1, COL1A1, ZEB2, AMOTL2, RSPO1, SOX4, FERMT2, RBMS3, WNT4, FGF10	246	454	20010	3.22499	0.201433	0.00124245	0.00113961
	GOTERM_BP_FAT	GO:1903036~positive regulation of response to wounding	9	3.35821	4.83835e-05	ANXA2, AHNAK, LRP1, PDPN, EMILIN2, PLAT, THBS1, FERMT2, DDR2	246	106	20010	6.90635	0.203443	0.00124946	0.00114605
	GOTERM_BP_FAT	GO:0001654~eye development	18	6.71642	4.87113e-05	NTRK2, NRP1, JUN, FZD4, SERPINF1, AQP5, MFAP5, SDK1, ZEB2, RCN1, EFEMP1, COL5A1, COL4A1, ALDH1A2, COL5A2, SH3PXD2B, FBN1, FGF10	246	455	20010	3.2179	0.20467	0.00125106	0.00114751
	GOTERM_BP_FAT	GO:0198738~cell-cell signaling by wnt	18	6.71642	5.07099e-05	WWTR1, FZD2, LRP1, SRC, FZD4, CAV1, APCDD1, CPZ, BICC1, COL1A1, ZEB2, AMOTL2, RSPO1, SOX4, FERMT2, RBMS3, WNT4, FGF10	246	456	20010	3.21085	0.212107	0.00129531	0.0011881
	GOTERM_BP_FAT	GO:0009790~embryo development	35	13.0597	5.25557e-05	MEG3, NRP1, TENM4, SEMA3C, PCSK5, EFEMP1, SH3PXD2A, SOX4, WNT4, SPECC1, FZD2, CMTM3, MMP2, KRT8, FN1, MTHFR, IGF1, HS3ST6, VASH1, MFAP5, COL1A1, ZEB2, RCN1, COL3A1, KRT19, MARCKS, MMP14, COL4A2, COL5A1, ALDH1A2, COL5A2, COL6A1, ID3, FGF10, FBN1	246	1354	20010	2.10262	0.218915	0.00132861	0.00121865
	GOTERM_BP_FAT	GO:0006915~apoptotic process	46	17.1642	5.2579e-05	NRP1, LRP1, SRC, FMR1, HTRA1, FAIM2, THBS1, FSTL1, PTPRF, AKAP12, CASP12, DRAM1, CNR1, CREB3L1, PDPN, PDK4, EMILIN2, SOX4, WNT4, TGM2, NTRK2, PRNP, JUN, GSN, IFI204, PEG3, DAPK1, CAV1, MMP2, ANXA5, KRT8, FN1, IGF1, BLCAP, GULP1, MARCKS, FNDC1, ALDH1A2, ID3, ACKR3, CD248, XAF1, AGRN, GAS6, FGF10, DDR2	246	2017	20010	1.85509	0.219	0.00132861	0.00121865
	GOTERM_BP_FAT	GO:0051347~positive regulation of transferase activity	21	7.83582	5.48735e-05	NTRK2, PRNP, CSF1, SRC, IRS1, FZD4, MMD2, IGF1, FGF1, THBS1, ADRA1A, GHR, ZEB2, MARCKS, IGFBP6, AGRN, GAS6, FERMT2, FBN1, DDR2, FGF10	246	601	20010	2.84221	0.227379	0.00137917	0.00126502
	GOTERM_BP_FAT	GO:0001706~endoderm formation	7	2.61194	5.56144e-05	MMP14, COL4A2, COL5A1, MMP2, COL5A2, COL6A1, FN1	246	55	20010	10.3525	0.230066	0.00139036	0.00127528
	GOTERM_BP_FAT	GO:0065009~regulation of molecular function	57	21.2687	5.78319e-05	SPON1, ECM1, CSF1, IRS1, FMR1, FGF1, ADRA1A, ANTXR1, PTPRF, GHR, CASP12, PALM, TIMP2, TGM2, ANXA2, DAPK1, SERPINF1, MMD2, MTSS2, ZEB2, VCAN, ADRB3, GAS6, DDR2, ITIH5, TNXB, LRP1, AHNAK, SRC, NPR3, THBS1, C9ORF72, SLC5A3, OAS1G, CNR1, SERPINH1, IGFBP6, WNT4, AOC3, NTRK2, WWTR1, PRNP, JUN, GSN, FZD2, IFI204, FZD4, CAV2, CAV1, ARHGAP29, IGF1, MARCKS, ID3, AGRN, FERMT2, FBN1, FGF10	246	2731	20010	1.69772	0.238051	0.00143815	0.00131912
	GOTERM_BP_FAT	GO:0034333~adherens junction assembly	8	2.98507	6.09312e-05	NRP1, MMP14, COL16A1, LRP1, SRC, PTPRK, FERMT2, WNT4	246	81	20010	8.03372	0.249073	0.00150725	0.0013825
	GOTERM_BP_FAT	GO:1901652~response to peptide	20	7.46269	6.35402e-05	PRNP, SPARC, LRP1, CAV2, SRC, IRS1, CAV1, MMP2, SERPINF1, ANXA5, IGF1, SOGA1, PTPRF, DNM1, GHR, COL1A1, COL3A1, MARCKS, PDK4, FBN1	246	559	20010	2.91025	0.258227	0.00156355	0.00143414
	GOTERM_BP_FAT	GO:1902533~positive regulation of intracellular signal transduction	31	11.5672	6.6614e-05	NRP1, LRP1, CSF1, SRC, FGF1, THBS1, ADRA1A, AKAP12, GHR, BMPER, TIMP2, IGFBP6, TGM2, NTRK2, JUN, IGFBP4, FZD4, CAV2, CAV1, CAVIN3, FN1, MMD2, IGF1, ZEB2, COL3A1, ADRB3, ACKR3, GAS6, FERMT2, FGF10, DDR2	246	1141	20010	2.20998	0.268869	0.00163066	0.00149569
	GOTERM_BP_FAT	GO:0010632~regulation of epithelial cell migration	13	4.85075	6.84593e-05	NRP1, JUN, SPARC, SRC, IRS1, SERPINF1, IGF1, VASH1, FGF1, THBS1, SRPX2, BMPER, FGF10	246	252	20010	4.19619	0.275184	0.00166714	0.00152916
	GOTERM_BP_FAT	GO:0014909~smooth muscle cell migration	9	3.35821	7.16359e-05	LRP1, ADAMTS1, SRC, CAV1, CCN3, PLAT, IGF1, PCSK5, DDR2	246	112	20010	6.53637	0.285929	0.00173551	0.00159187
	GOTERM_BP_FAT	GO:0042063~gliogenesis	16	5.97015	7.46304e-05	NTRK2, GSN, LAMA2, LRP1, CSF1, TENM4, FN1, LAMB1, IGF1, APCDD1, VCAN, MMP14, COL3A1, EFEMP1, SOX4, FGF10	246	380	20010	3.4249	0.295911	0.00179878	0.00164991
	GOTERM_BP_FAT	GO:1901343~negative regulation of vasculature development	10	3.73134	7.63052e-05	MEG3, SPARC, COL4A2, ADAMTS1, CREB3L1, SERPINF1, VASH1, THBS2, THBS1, WNT4	246	145	20010	5.60976	0.301433	0.00182977	0.00167832
	GOTERM_BP_FAT	GO:0032964~collagen biosynthetic process	7	2.61194	8.29842e-05	COL1A1, COL5A1, CREB3L1, SERPINH1, FN1, WNT4, DDR2	246	59	20010	9.65068	0.323028	0.00197983	0.00181596
	GOTERM_BP_FAT	GO:0051336~regulation of hydrolase activity	30	11.194	8.34642e-05	ITIH5, ECM1, LRP1, SRC, THBS1, ADRA1A, ANTXR1, C9ORF72, OAS1G, CASP12, TIMP2, SERPINH1, WNT4, TGM2, NTRK2, GSN, IFI204, DAPK1, CAV2, SERPINF1, CAV1, ARHGAP29, IGF1, MTSS2, VCAN, MARCKS, AGRN, GAS6, FERMT2, FGF10	246	1099	20010	2.22042	0.324554	0.00198122	0.00181724
	GOTERM_BP_FAT	GO:0050808~synapse organization	16	5.97015	9.67463e-05	NTRK2, FMR1, LGI2, THBS2, PTPRF, SDK1, MARCKS, SRPX2, FLRT2, PALLD, COL4A1, PALM, SNCG, COL4A5, AGRN, GPC6	246	389	20010	3.34566	0.365442	0.00228496	0.00209585
	GOTERM_BP_FAT	GO:0030029~actin filament-based process	25	9.32836	9.89005e-05	NRP1, LRP1, SRC, ARHGAP18, RND3, ANTXR1, LIMA1, EFS, PDPN, SH3PXD2B, WNT4, SPECC1, KIRREL, GSN, CAV1, CAVIN3, KRT8, KRT19, MARCKS, PALLD, MYO5B, PKP2, AMOTL2, FERMT2, FGF10	246	835	20010	2.43537	0.371836	0.00232416	0.0021318
	GOTERM_BP_FAT	GO:0043065~positive regulation of apoptotic process	22	8.20896	0.000103564	PRNP, JUN, GSN, DAPK1, SRC, CAV1, MMP2, ANXA5, HTRA1, THBS1, PTPRF, AKAP12, CASP12, FNDC1, CNR1, ALDH1A2, EMILIN2, ID3, CD248, AGRN, SOX4, TGM2	246	681	20010	2.62777	0.38546	0.00242165	0.00222122
	GOTERM_BP_FAT	GO:0060485~mesenchyme development	14	5.22388	0.000105394	WWTR1, NRP1, RIAN, SEMA3C, FN1, THBS1, LOXL2, COL1A1, ZEB2, ALDH1A2, PDPN, FERMT2, WNT4, FGF10	246	305	20010	3.73371	0.390724	0.00245224	0.00224928
	GOTERM_BP_FAT	GO:0043549~regulation of kinase activity	24	8.95522	0.000107265	NTRK2, WWTR1, PRNP, TNXB, CSF1, SRC, IRS1, FZD4, CAV1, MMD2, IGF1, FGF1, THBS1, ADRA1A, GHR, ZEB2, MARCKS, IGFBP6, AGRN, GAS6, FERMT2, FBN1, DDR2, FGF10	246	786	20010	2.48371	0.396059	0.00248347	0.00227793
	GOTERM_BP_FAT	GO:0042692~muscle cell differentiation	19	7.08955	0.000112312	MEG3, LAMA2, CAV2, COL14A1, KRT8, LAMB1, IGF1, NID1, ADRA1A, ADAMTS5, ADAMTS15, MMP14, KRT19, ID3, CCN3, PTGFRN, SOX4, WNT4, FGF10	246	535	20010	2.88876	0.410221	0.00258432	0.00237043
	GOTERM_BP_FAT	GO:0045859~regulation of protein kinase activity	22	8.20896	0.000113129	WWTR1, PRNP, TNXB, CSF1, SRC, FZD4, CAV1, MMD2, IGF1, FGF1, THBS1, ADRA1A, GHR, ZEB2, MARCKS, IGFBP6, AGRN, GAS6, FERMT2, FBN1, DDR2, FGF10	246	685	20010	2.61243	0.412482	0.00258432	0.00237043
	GOTERM_BP_FAT	GO:0061138~morphogenesis of a branching epithelium	12	4.47761	0.00011327	ADAMTS16, NRP1, MMP14, CSF1, SEMA3C, COL4A1, SRC, IGF1, FGF1, WNT4, FGF10, TGM2	246	226	20010	4.31902	0.412873	0.00258432	0.00237043
	GOTERM_BP_FAT	GO:0043068~positive regulation of programmed cell death	22	8.20896	0.000115457	PRNP, JUN, GSN, DAPK1, SRC, CAV1, MMP2, ANXA5, HTRA1, THBS1, PTPRF, AKAP12, CASP12, FNDC1, CNR1, ALDH1A2, EMILIN2, ID3, CD248, AGRN, SOX4, TGM2	246	686	20010	2.60862	0.418878	0.00262148	0.00240451
	GOTERM_BP_FAT	GO:0044087~regulation of cellular component biogenesis	30	11.194	0.000117667	NRP1, COL16A1, LRP1, SRC, FMR1, ARHGAP18, THBS2, ANTXR1, C9ORF72, PCSK5, ADAMTS16, SRPX2, FLRT2, SH3PXD2B, PALM, GPC6, WNT4, NTRK2, JUN, KIRREL, GSN, CAV1, ISG15, MMP14, PALLD, MYO5B, PKP2, XAF1, AGRN, FERMT2	246	1121	20010	2.17685	0.424885	0.00265882	0.00243876
	GOTERM_BP_FAT	GO:0090303~positive regulation of wound healing	8	2.98507	0.000127882	ANXA2, AHNAK, PDPN, EMILIN2, PLAT, THBS1, FERMT2, DDR2	246	91	20010	7.1509	0.451853	0.00287581	0.00263779
	GOTERM_BP_FAT	GO:0050767~regulation of neurogenesis	28	10.4478	0.000136784	NRP1, LRP1, TENM4, CSF1, SEMA3C, FMR1, PTPRF, EFEMP1, FLRT2, CNR1, ADAMTS1, PALM, TIMP2, TGM2, NTRK2, ANXA2, SERPINF1, CAV1, FN1, MMD2, IGF1, IGSF10, SDK1, ZEB2, COL3A1, MARCKS, MYO5B, AGRN	246	1018	20010	2.23729	0.474321	0.00306135	0.00280798
	GOTERM_BP_FAT	GO:0090109~regulation of cell-substrate junction assembly	7	2.61194	0.000143106	NRP1, MMP14, COL16A1, LRP1, SRC, FERMT2, WNT4	246	65	20010	8.75985	0.489716	0.00317262	0.00291004
	GOTERM_BP_FAT	GO:0051893~regulation of focal adhesion assembly	7	2.61194	0.000143106	NRP1, MMP14, COL16A1, LRP1, SRC, FERMT2, WNT4	246	65	20010	8.75985	0.489716	0.00317262	0.00291004
	GOTERM_BP_FAT	GO:0060562~epithelial tube morphogenesis	16	5.97015	0.00014663	MEG3, NRP1, FZD2, CSF1, SRC, MTHFR, IGF1, FGF1, ADAMTS16, ZEB2, MMP14, COL4A1, ALDH1A2, SOX4, WNT4, FGF10	246	404	20010	3.22144	0.498102	0.0032355	0.00296771
	GOTERM_BP_FAT	GO:1904707~positive regulation of vascular smooth muscle cell proliferation	6	2.23881	0.000155246	JUN, ADAMTS1, SRC, MMP2, IGF1, DDR2	246	42	20010	11.6202	0.518026	0.0034096	0.0031274
	GOTERM_BP_FAT	GO:1901214~regulation of neuron death	16	5.97015	0.00015882	NTRK2, NRP1, PRNP, JUN, LRP1, CSF1, FMR1, SERPINF1, FAIM2, IGF1, PTPRF, GHR, SNCG, AGRN, CD34, DDR2	246	407	20010	3.1977	0.526058	0.00347187	0.00318452
	GOTERM_BP_FAT	GO:0044089~positive regulation of cellular component biogenesis	21	7.83582	0.000166943	NTRK2, NRP1, JUN, GSN, KIRREL, COL16A1, SRC, CAV1, FMR1, ISG15, THBS2, PCSK5, SRPX2, FLRT2, PALLD, MYO5B, SH3PXD2B, PALM, AGRN, FERMT2, WNT4	246	653	20010	2.61588	0.543819	0.00363256	0.00333191
	GOTERM_BP_FAT	GO:0048660~regulation of smooth muscle cell proliferation	11	4.10448	0.000171463	JUN, ADAMTS1, SRC, CAV1, MMP2, NPR3, OGN, IGF1, THBS1, DDR2, TGM2	246	198	20010	4.51897	0.553411	0.00371371	0.00340634
	GOTERM_BP_FAT	GO:0014812~muscle cell migration	9	3.35821	0.000172593	LRP1, ADAMTS1, SRC, CAV1, CCN3, PLAT, IGF1, PCSK5, DDR2	246	127	20010	5.76436	0.555778	0.00371584	0.0034083
	GOTERM_BP_FAT	GO:0071604~transforming growth factor beta production	6	2.23881	0.000173933	LAPTM4B, COL3A1, LUM, FN1, THBS1, CD34	246	43	20010	11.35	0.558568	0.00371584	0.0034083
	GOTERM_BP_FAT	GO:0085029~extracellular matrix assembly	6	2.23881	0.000173933	COL3A1, TNXB, COL1A2, LAMB1, GAS6, ANTXR1	246	43	20010	11.35	0.558568	0.00371584	0.0034083
	GOTERM_BP_FAT	GO:0003013~circulatory system process	19	7.08955	0.000181549	AOC3, WWTR1, GSN, SRC, CAV1, MMP2, NPR3, SOD3, ADRA1A, AKAP12, ADAMTS16, COL1A2, ADRB3, CNR1, PKP2, AGRN, GAS6, CD34, FERMT2	246	556	20010	2.77965	0.574095	0.00385706	0.00353783
	GOTERM_BP_FAT	GO:0016525~negative regulation of angiogenesis	9	3.35821	0.000182185	MEG3, SPARC, COL4A2, ADAMTS1, CREB3L1, SERPINF1, VASH1, THBS2, THBS1	246	128	20010	5.71932	0.575366	0.00385706	0.00353783
	GOTERM_BP_FAT	GO:0010720~positive regulation of cell development	22	8.20896	0.000183434	MEG3, NTRK2, NRP1, LRP1, CSF1, SEMA3C, TENM4, FMR1, SERPINF1, FN1, MMD2, IGF1, PTPRF, ZEB2, MARCKS, CNR1, ADAMTS1, MYO5B, PALM, TIMP2, FERMT2, TGM2	246	710	20010	2.52044	0.577852	0.00386609	0.00354611
	GOTERM_BP_FAT	GO:0090092~regulation of transmembrane receptor protein serine/threonine kinase signaling pathway	13	4.85075	0.000190563	WWTR1, LRP1, CAV2, CAV1, HTRA1, THBS1, FSTL1, BMP3, ZEB2, BMPER, CCN3, FBN1, FGF10	246	281	20010	3.76313	0.59177	0.00398835	0.00365825
	GOTERM_BP_FAT	GO:0007568~aging	16	5.97015	0.000190931	MEG3, PRNP, JUN, GSN, LRP1, CAV1, MMP2, SERPINF1, PRELP, GSTT1, VASH1, ADRA1A, ADRB3, COL4A2, CNR1, TIMP2	246	414	20010	3.14363	0.592476	0.00398835	0.00365825
	GOTERM_BP_FAT	GO:0010634~positive regulation of epithelial cell migration	10	3.73134	0.000195061	NRP1, JUN, SPARC, SRPX2, SRC, IRS1, IGF1, FGF1, THBS1, FGF10	246	164	20010	4.95985	0.600312	0.00405658	0.00372084
	GOTERM_BP_FAT	GO:1903391~regulation of adherens junction organization	7	2.61194	0.000199407	NRP1, MMP14, COL16A1, LRP1, SRC, FERMT2, WNT4	246	69	20010	8.25203	0.608397	0.00412869	0.00378698
	GOTERM_BP_FAT	GO:0012501~programmed cell death	46	17.1642	0.000214432	NRP1, LRP1, SRC, FMR1, HTRA1, FAIM2, THBS1, FSTL1, PTPRF, AKAP12, CASP12, DRAM1, CNR1, CREB3L1, PDPN, PDK4, EMILIN2, SOX4, WNT4, TGM2, NTRK2, PRNP, JUN, GSN, IFI204, PEG3, DAPK1, CAV1, MMP2, ANXA5, KRT8, FN1, IGF1, BLCAP, GULP1, MARCKS, FNDC1, ALDH1A2, ID3, ACKR3, CD248, XAF1, AGRN, GAS6, FGF10, DDR2	246	2143	20010	1.74601	0.635108	0.00442031	0.00405446
	GOTERM_BP_FAT	GO:0030193~regulation of blood coagulation	8	2.98507	0.000216539	ANXA2, CAV1, ANXA5, PDPN, EMILIN2, PLAT, THBS1, CD34	246	99	20010	6.57305	0.638704	0.00444424	0.00407641
	GOTERM_BP_FAT	GO:0031175~neuron projection development	29	10.8209	0.000221734	MEG3, NRP1, LAMA2, LRP1, SEMA3C, FMR1, PTPRK, C9ORF72, PTPRF, EFEMP1, FLRT2, CNR1, ADAMTS1, PALM, EFHD1, MPDZ, NTRK2, JUN, SERPINF1, MMP2, FN1, LAMB1, SDK1, ZEB2, MARCKS, PALLD, MYO5B, CDH11, AGRN	246	1106	20010	2.13282	0.647424	0.00453109	0.00415607
	GOTERM_BP_FAT	GO:0035456~response to interferon-beta	7	2.61194	0.000233437	IFITM3, F830016B08RIK, IFI204, GM4951, XAF1, IIGP1, OAS1G	246	71	20010	8.01958	0.666301	0.00474958	0.00435648
	GOTERM_BP_FAT	GO:1900046~regulation of hemostasis	8	2.98507	0.00024506	ANXA2, CAV1, ANXA5, PDPN, EMILIN2, PLAT, THBS1, CD34	246	101	20010	6.44289	0.68405	0.00496459	0.00455369
	GOTERM_BP_FAT	GO:0060548~negative regulation of cell death	31	11.5672	0.000248374	NRP1, LRP1, CSF1, SRC, FMR1, FAIM2, THBS1, FSTL1, NPAS2, GHR, CREB3L1, PDPN, PDK4, SNCG, CCN3, CD34, SOX4, WNT4, NTRK2, PRNP, JUN, DAPK1, SERPINF1, CAV1, FN1, IGF1, ACKR3, GAS6, FERMT2, FGF10, DDR2	246	1230	20010	2.05007	0.688934	0.00501012	0.00459545
	GOTERM_BP_FAT	GO:0050818~regulation of coagulation	8	2.98507	0.000276532	ANXA2, CAV1, ANXA5, PDPN, EMILIN2, PLAT, THBS1, CD34	246	103	20010	6.31778	0.727511	0.00555428	0.00509458
	GOTERM_BP_FAT	GO:0061061~muscle structure development	23	8.58209	0.00028279	MEG3, FZD2, LAMA2, CAV2, COL14A1, CAV1, KRT8, LAMB1, IGF1, NID1, ADRA1A, ADAMTS5, ADAMTS15, MMP14, COL3A1, KRT19, PKP2, ID3, CCN3, PTGFRN, SOX4, WNT4, FGF10	246	786	20010	2.38022	0.735413	0.00565581	0.0051877
	GOTERM_BP_FAT	GO:0048771~tissue remodeling	11	4.10448	0.000285292	MMP14, LRP1, SEMA3C, SRC, CAV1, CTSK, MMP2, PDK4, IGF1, FGF10, TGM2	246	211	20010	4.24055	0.738507	0.00568166	0.00521141
	GOTERM_BP_FAT	GO:0080134~regulation of response to stress	38	14.1791	0.000300304	TNXB, LRP1, AHNAK, FMR1, HTRA1, PLAT, ADAMTS12, THBS1, PTPRF, NPAS2, OAS1G, CASP12, CNR1, CREB3L1, PDPN, EMILIN2, EFHD1, CCN3, IGFBP6, CD34, SOX4, WNT4, TGM2, AOC3, MUC16, IFI204, ANXA2, FZD4, SERPINF1, CAV1, ANXA5, ISG15, VASH1, ZEB2, ACKR3, FERMT2, FGF10, DDR2	246	1668	20010	1.8531	0.75633	0.0059499	0.00545745
	GOTERM_BP_FAT	GO:0001763~morphogenesis of a branching structure	12	4.47761	0.000301293	ADAMTS16, NRP1, MMP14, CSF1, SEMA3C, COL4A1, SRC, IGF1, FGF1, WNT4, FGF10, TGM2	246	253	20010	3.85809	0.757461	0.0059499	0.00545745
	GOTERM_BP_FAT	GO:0000904~cell morphogenesis involved in differentiation	24	8.95522	0.000308318	MEG3, NTRK2, NRP1, LAMA2, LRP1, SEMA3C, SRC, FZD4, FNDC3B, KRT8, FN1, LAMB1, ANTXR1, C9ORF72, PTPRF, ZEB2, MARCKS, FLRT2, PALLD, MYO5B, PDPN, CDH11, AGRN, FERMT2	246	846	20010	2.30756	0.765342	0.00606316	0.00556133
	GOTERM_BP_FAT	GO:1904705~regulation of vascular smooth muscle cell proliferation	7	2.61194	0.000315125	JUN, ADAMTS1, SRC, CAV1, MMP2, IGF1, DDR2	246	75	20010	7.59187	0.772735	0.0061712	0.00566044
	GOTERM_BP_FAT	GO:0030323~respiratory tube development	12	4.47761	0.000319162	MEG3, ADAMTS2, COL3A1, MMP14, SPARC, ALDH1A2, PDPN, FNDC3B, IGF1, FGF1, PCSK5, FGF10	246	255	20010	3.82783	0.777008	0.00622432	0.00570916
	GOTERM_BP_FAT	GO:0034446~substrate adhesion-dependent cell spreading	8	2.98507	0.000329756	NRP1, SRC, FZD4, FNDC3B, FN1, LAMB1, ANTXR1, FERMT2	246	106	20010	6.13898	0.787845	0.00640434	0.00587428
	GOTERM_BP_FAT	GO:0060070~canonical Wnt signaling pathway	13	4.85075	0.000335551	WWTR1, FZD2, SRC, FZD4, CAV1, BICC1, COL1A1, ZEB2, RSPO1, SOX4, RBMS3, WNT4, FGF10	246	299	20010	3.53659	0.793549	0.00649009	0.00595293
	GOTERM_BP_FAT	GO:0048666~neuron development	32	11.9403	0.000341877	MEG3, NRP1, LAMA2, LRP1, TENM4, SEMA3C, FMR1, PTPRK, C9ORF72, PTPRF, EFEMP1, FLRT2, CNR1, ADAMTS1, PALM, EFHD1, MPDZ, NTRK2, JUN, FZD2, SERPINF1, MMP2, FN1, LAMB1, SDK1, ZEB2, MARCKS, PALLD, MYO5B, CDH11, LHX6, AGRN	246	1313	20010	1.98243	0.7996	0.00658533	0.00604029
	GOTERM_BP_FAT	GO:0001936~regulation of endothelial cell proliferation	10	3.73134	0.000343727	ECM1, JUN, SPARC, CAV2, ALDH1A2, CAV1, IGF1, VASH1, THBS1, FGF10	246	177	20010	4.59556	0.801335	0.00659394	0.00604819
	GOTERM_BP_FAT	GO:0043900~regulation of multi-organism process	17	6.34328	0.00035931	IFITM3, JUN, GSN, IFI204, ANXA2, CAV2, SRC, CAV1, FMR1, HTRA1, PLAT, ISG15, IGF1, OAS1G, CNR1, EMILIN2, RSPO1	246	488	20010	2.83362	0.815373	0.00686486	0.00629668
	GOTERM_BP_FAT	GO:1990874~vascular smooth muscle cell proliferation	7	2.61194	0.000389906	JUN, ADAMTS1, SRC, CAV1, MMP2, IGF1, DDR2	246	78	20010	7.29987	0.840116	0.00741926	0.0068052
	GOTERM_BP_FAT	GO:0043933~macromolecular complex subunit organization	42	15.6716	0.000408297	TNXB, STEAP4, COL16A1, COL14A1, SRC, DPT, ARHGAP18, AQP5, ADAMTS12, C9ORF72, PCSK5, LOXL1, LOXL2, OAS1G, LIMA1, ADAMTS2, ADAMTS14, SH3PXD2B, SERPINH1, PLTP, TGM2, PRNP, JUN, KIRREL, GSN, ANXA2, LUM, CAV1, FN1, ISG15, DNM1, COL1A1, COL3A1, COL1A2, COL5A1, PALLD, ALDH1A2, COL5A2, XAF1, FERMT2, KCTD12B, DDR2	246	1948	20010	1.75377	0.853363	0.00773789	0.00709746
	GOTERM_BP_FAT	GO:0034329~cell junction assembly	12	4.47761	0.000418753	NRP1, MMP14, COL16A1, LRP1, SRC, CAV1, CDH11, PKP2, FN1, PTPRK, FERMT2, WNT4	246	263	20010	3.7114	0.860399	0.00790417	0.00724997
	GOTERM_BP_FAT	GO:1900141~regulation of oligodendrocyte apoptotic process	3	1.1194	0.000444298	AKAP12, IGF1, GAS6	246	3	20010	81.3415	0.876202	0.0083528	0.00766147
	GOTERM_BP_FAT	GO:0045669~positive regulation of osteoblast differentiation	7	2.61194	0.000446997	IFITM3, WWTR1, IFI204, IGF1, FERMT2, WNT4, DDR2	246	80	20010	7.11738	0.877764	0.00837006	0.00767731
	GOTERM_BP_FAT	GO:0050678~regulation of epithelial cell proliferation	16	5.97015	0.000450895	RIAN, ECM1, JUN, SPARC, MUC16, CAV2, CAV1, SERPINF1, HTRA1, IGF1, PTPRK, VASH1, FGF1, THBS1, ALDH1A2, FGF10	246	449	20010	2.89858	0.879985	0.00840955	0.00771352
	GOTERM_BP_FAT	GO:1905114~cell surface receptor signaling pathway involved in cell-cell signaling	18	6.71642	0.000455862	WWTR1, FZD2, LRP1, SRC, FZD4, CAV1, APCDD1, CPZ, BICC1, COL1A1, ZEB2, AMOTL2, RSPO1, SOX4, FERMT2, RBMS3, WNT4, FGF10	246	549	20010	2.66693	0.882756	0.00846858	0.00776767
	GOTERM_BP_FAT	GO:0022604~regulation of cell morphogenesis	18	6.71642	0.00046511	NTRK2, NRP1, SPARC, LRP1, SEMA3C, SRC, FN1, ARHGAP18, RND3, PTPRF, ZEB2, MARCKS, PALMD, MYO5B, PDPN, PALM, AGRN, FERMT2	246	550	20010	2.66208	0.887746	0.00860637	0.00789406
	GOTERM_BP_FAT	GO:0050803~regulation of synapse structure or activity	11	4.10448	0.000475321	NTRK2, MARCKS, SPARC, SRPX2, FLRT2, FMR1, THBS2, AGRN, GPC6, PTPRF, DNM1	246	225	20010	3.97669	0.89301	0.00873948	0.00801615
	GOTERM_BP_FAT	GO:0051057~positive regulation of small GTPase mediated signal transduction	7	2.61194	0.000477882	COL3A1, CSF1, SRC, MMD2, IGF1, FGF10, TGM2	246	81	20010	7.02951	0.894291	0.00873948	0.00801615
	GOTERM_BP_FAT	GO:0061045~negative regulation of wound healing	7	2.61194	0.000477882	ANXA2, MUC16, ANXA5, PLAT, THBS1, CD34, WNT4	246	81	20010	7.02951	0.894291	0.00873948	0.00801615
	GOTERM_BP_FAT	GO:0035556~intracellular signal transduction	53	19.7761	0.000479935	NRP1, CSF1, IRS1, FGF1, ADRA1A, RND3, GHR, AKAP12, CASP12, BMPER, CREB3L1, TIMP2, CCN3, SOX4, TGM2, DAPK1, IGFBP4, HUNK, MMD2, ZEB2, ADRB3, GAS6, DDR2, TNXB, LRP1, SRC, NPR3, ARHGAP18, THBS1, C9ORF72, ADCY5, PDPN, IGFBP6, NTRK2, WWTR1, PRNP, JUN, GSN, IFI204, FZD4, CAV2, CAV1, CAVIN3, FN1, ARHGAP29, IGF1, COL3A1, COL1A2, ACKR3, AMOTL2, FERMT2, FBN1, FGF10	246	2688	20010	1.60383	0.895306	0.008743	0.00801938
	GOTERM_BP_FAT	GO:0007599~hemostasis	10	3.73134	0.000493557	ANXA2, CAV1, ANXA5, PDPN, FN1, EMILIN2, PLAT, GAS6, THBS1, CD34	246	186	20010	4.3732	0.901804	0.00895546	0.00821425
	GOTERM_BP_FAT	GO:0070997~neuron death	16	5.97015	0.000495409	NTRK2, NRP1, PRNP, JUN, LRP1, CSF1, FMR1, SERPINF1, FAIM2, IGF1, PTPRF, GHR, SNCG, AGRN, CD34, DDR2	246	453	20010	2.87299	0.902655	0.00895546	0.00821425
	GOTERM_BP_FAT	GO:0034330~cell junction organization	13	4.85075	0.00050566	NRP1, KIRREL, COL16A1, LRP1, SRC, CAV1, FN1, PTPRK, MMP14, CDH11, PKP2, FERMT2, WNT4	246	313	20010	3.3784	0.907237	0.00910576	0.00835211
	GOTERM_BP_FAT	GO:0050817~coagulation	10	3.73134	0.000532	ANXA2, CAV1, ANXA5, PDPN, FN1, EMILIN2, PLAT, GAS6, THBS1, CD34	246	188	20010	4.32667	0.918046	0.0095435	0.00875363
	GOTERM_BP_FAT	GO:0018108~peptidyl-tyrosine phosphorylation	13	4.85075	0.000534338	NRP1, PRNP, CAV2, SRC, CAV1, IGF1, ADRA1A, GHR, EFEMP1, AGRN, GAS6, DDR2, FGF10	246	315	20010	3.35695	0.918942	0.009549	0.00875867
	GOTERM_BP_FAT	GO:1901215~negative regulation of neuron death	12	4.47761	0.000537993	GHR, NTRK2, NRP1, JUN, CSF1, LRP1, FMR1, SERPINF1, SNCG, FAIM2, IGF1, CD34	246	271	20010	3.60184	0.920324	0.0095779	0.00878517
	GOTERM_BP_FAT	GO:0008284~positive regulation of cell proliferation	28	10.4478	0.000558804	ECM1, CSF1, SRC, IRS1, HTRA1, FGF1, THBS1, CD1D1, EFEMP1, ADAMTS1, SOX4, TGM2, NTRK2, WWTR1, JUN, ANXA2, CAV2, CAV1, MMP2, FNDC3B, FN1, IGF1, ALDH1A2, CD248, GAS6, FERMT2, FGF10, DDR2	246	1113	20010	2.04633	0.927753	0.00991086	0.00909058
	GOTERM_BP_FAT	GO:0042981~regulation of apoptotic process	38	14.1791	0.000575538	NRP1, LRP1, SRC, FMR1, HTRA1, FAIM2, THBS1, FSTL1, PTPRF, AKAP12, CASP12, CNR1, CREB3L1, PDPN, PDK4, EMILIN2, SOX4, WNT4, TGM2, NTRK2, PRNP, JUN, GSN, DAPK1, CAV1, MMP2, ANXA5, FN1, IGF1, FNDC1, ALDH1A2, ID3, ACKR3, CD248, AGRN, GAS6, FGF10, DDR2	246	1726	20010	1.79083	0.933222	0.0101322	0.00929362
	GOTERM_BP_FAT	GO:0048754~branching morphogenesis of an epithelial tube	10	3.73134	0.000575597	ADAMTS16, NRP1, MMP14, CSF1, COL4A1, SRC, IGF1, FGF1, WNT4, FGF10	246	190	20010	4.28113	0.933241	0.0101322	0.00929362
	GOTERM_BP_FAT	GO:0018212~peptidyl-tyrosine modification	13	4.85075	0.000583037	NRP1, PRNP, CAV2, SRC, CAV1, IGF1, ADRA1A, GHR, EFEMP1, AGRN, GAS6, DDR2, FGF10	246	318	20010	3.32528	0.935537	0.0102249	0.00937864
	GOTERM_BP_FAT	GO:0030036~actin cytoskeleton organization	21	7.83582	0.000602568	SPECC1, NRP1, GSN, KIRREL, SRC, CAVIN3, KRT8, ARHGAP18, ANTXR1, RND3, LIMA1, KRT19, MARCKS, EFS, PALLD, MYO5B, SH3PXD2B, AMOTL2, FERMT2, WNT4, FGF10	246	722	20010	2.36589	0.941195	0.0105281	0.00965678
	GOTERM_BP_FAT	GO:0030030~cell projection organization	38	14.1791	0.000607469	MEG3, NRP1, LAMA2, LRP1, SEMA3C, SRC, FMR1, PTPRK, C9ORF72, PTPRF, ADAMTS16, LIMA1, EFEMP1, FLRT2, CNR1, ADAMTS1, PDPN, PALM, EFHD1, MPDZ, NTRK2, WWTR1, PRNP, JUN, GSN, SERPINF1, CAV1, MMP2, FN1, LAMB1, MTSS2, SDK1, ZEB2, MARCKS, PALLD, MYO5B, CDH11, AGRN	246	1731	20010	1.78566	0.942535	0.0105745	0.00969926
	GOTERM_BP_FAT	GO:0051271~negative regulation of cellular component movement	14	5.22388	0.000613114	IFITM3, NRP1, LRP1, SEMA3C, CAV1, SERPINF1, PTPRK, VASH1, THBS1, COL3A1, PKP2, EMILIN2, CCN3, WNT4	246	366	20010	3.11142	0.944041	0.0106333	0.00975326
	GOTERM_BP_FAT	GO:0050769~positive regulation of neurogenesis	19	7.08955	0.000638837	NTRK2, NRP1, LRP1, CSF1, TENM4, FMR1, SERPINF1, FN1, MMD2, IGF1, PTPRF, ZEB2, MARCKS, CNR1, ADAMTS1, MYO5B, PALM, TIMP2, TGM2	246	618	20010	2.50079	0.950418	0.0110387	0.0101251
	GOTERM_BP_FAT	GO:0043542~endothelial cell migration	11	4.10448	0.000646112	NRP1, SPARC, SRPX2, SERPINF1, CCN3, IGF1, VASH1, FGF1, THBS1, FSTL1, LOXL2	246	234	20010	3.82374	0.952086	0.0111235	0.0102029
	GOTERM_BP_FAT	GO:0048661~positive regulation of smooth muscle cell proliferation	8	2.98507	0.00066291	JUN, ADAMTS1, SRC, MMP2, IGF1, THBS1, DDR2, TGM2	246	119	20010	5.46833	0.955727	0.0113711	0.0104299
	GOTERM_BP_FAT	GO:0009628~response to abiotic stimulus	32	11.9403	0.00067293	SPARC, SRC, FMR1, PLOD2, PLAT, PTPRK, AQP5, FGF1, THBS1, LOXL2, AKAP12, PDPN, PALM, EFHD1, IGFBP7, CD34, SOX4, JUN, GSN, IFI204, SERPINF1, CAV1, MMP2, KRT8, MTHFR, IGF1, SOD3, COL1A1, COL3A1, MMP14, ADRB3, FNDC1	246	1367	20010	1.90412	0.957765	0.011501	0.0105491
	GOTERM_BP_FAT	GO:0016310~phosphorylation	48	17.9104	0.000678854	NRP1, TNXB, LRP1, CSF1, SRC, IRS1, GM12248, FMR1, FGF1, THBS1, ADRA1A, C9ORF72, AKAP12, GHR, EFEMP1, BMPER, PDK4, TIMP2, RSPO1, IGFBP6, NTRK2, WWTR1, PRNP, JUN, KIRREL, ANXA2, DAPK1, IGFBP4, FZD4, CAV2, CAV1, CAVIN3, FN1, HUNK, MMD2, IGF1, BMP3, ZEB2, MARCKS, ADRB3, FNDC1, ACKR3, AGRN, GAS6, FERMT2, FGF10, FBN1, DDR2	246	2392	20010	1.63227	0.958926	0.0115602	0.0106034
	GOTERM_BP_FAT	GO:0007267~cell-cell signaling	37	13.806	0.000692727	MEG3, LAMA2, LRP1, SRC, IRS1, FMR1, PLAT, APCDD1, CPZ, ADRA1A, ADCY5, CNR1, NNAT, SNCG, CCN3, RSPO1, CD34, SOX4, WNT4, NTRK2, WWTR1, PRNP, FZD2, FZD4, CAV2, CAV1, ANXA5, BICC1, COL1A1, ZEB2, PKP2, AMOTL2, AGRN, FERMT2, RBMS3, FGF10, FBN1	246	1680	20010	1.79145	0.961521	0.0117539	0.010781
	GOTERM_BP_FAT	GO:0045778~positive regulation of ossification	8	2.98507	0.000696763	IFITM3, WWTR1, IFI204, ISG15, IGF1, FERMT2, WNT4, DDR2	246	120	20010	5.42276	0.962245	0.0117798	0.0108048
	GOTERM_BP_FAT	GO:0032880~regulation of protein localization	26	9.70149	0.000704029	LRP1, SRC, IRS1, C9ORF72, SLC5A3, ADCY5, BMPER, CNR1, NNAT, CCN3, CD34, GPC6, SOX4, WWTR1, PRNP, GSN, CAV2, ANXA5, MMD2, IGF1, MMP14, FNDC1, MYO5B, GAS6, FERMT2, FBN1	246	1013	20010	2.08774	0.963513	0.01186	0.0108784
	GOTERM_BP_FAT	GO:0031099~regeneration	11	4.10448	0.000711712	IGSF10, JUN, GSN, LRP1, MMP2, CCN3, IGF1, PTGFRN, GAS6, PTPRF, FGF10	246	237	20010	3.77534	0.964809	0.0119466	0.0109578
	GOTERM_BP_FAT	GO:0030111~regulation of Wnt signaling pathway	13	4.85075	0.000723319	WWTR1, LRP1, SRC, FZD4, CAV1, APCDD1, BICC1, COL1A1, ZEB2, RSPO1, SOX4, RBMS3, FGF10	246	326	20010	3.24368	0.966678	0.0120982	0.0110969
	GOTERM_BP_FAT	GO:0010817~regulation of hormone levels	19	7.08955	0.000739605	MEG3, AKR1CL, LRP1, IRS1, FZD4, ANXA5, IGF1, PCSK5, DHRS3, ADCY5, GHR, CNR1, CTSK, ALDH1A2, NNAT, CCN3, SOX4, FBN1, WNT4	246	626	20010	2.46883	0.969136	0.0122443	0.0112309
	GOTERM_BP_FAT	GO:2001046~positive regulation of integrin-mediated signaling pathway	4	1.49254	0.000739868	LAMA2, LAMB1, NID1, PCSK5	246	15	20010	21.6911	0.969174	0.0122443	0.0112309
	GOTERM_BP_FAT	GO:2000811~negative regulation of anoikis	4	1.49254	0.000739868	NTRK2, SRC, CAV1, PDK4	246	15	20010	21.6911	0.969174	0.0122443	0.0112309
	GOTERM_BP_FAT	GO:0043067~regulation of programmed cell death	38	14.1791	0.000743651	NRP1, LRP1, SRC, FMR1, HTRA1, FAIM2, THBS1, FSTL1, PTPRF, AKAP12, CASP12, CNR1, CREB3L1, PDPN, PDK4, EMILIN2, SOX4, WNT4, TGM2, NTRK2, PRNP, JUN, GSN, DAPK1, CAV1, MMP2, ANXA5, FN1, IGF1, FNDC1, ALDH1A2, ID3, ACKR3, CD248, AGRN, GAS6, FGF10, DDR2	246	1750	20010	1.76627	0.969718	0.0122637	0.0112487
	GOTERM_BP_FAT	GO:0050731~positive regulation of peptidyl-tyrosine phosphorylation	10	3.73134	0.000773118	GHR, PRNP, NRP1, CAV2, SRC, IGF1, AGRN, GAS6, ADRA1A, FGF10	246	198	20010	4.10815	0.973638	0.0127051	0.0116535
	GOTERM_BP_FAT	GO:0051338~regulation of transferase activity	24	8.95522	0.000790695	NTRK2, WWTR1, PRNP, TNXB, CSF1, SRC, IRS1, FZD4, CAV1, MMD2, IGF1, FGF1, THBS1, ADRA1A, GHR, ZEB2, MARCKS, IGFBP6, AGRN, GAS6, FERMT2, FBN1, DDR2, FGF10	246	906	20010	2.15474	0.97573	0.012877	0.0118112
	GOTERM_BP_FAT	GO:0000902~cell morphogenesis	28	10.4478	0.000791463	MEG3, NRP1, LAMA2, LRP1, SEMA3C, SRC, ARHGAP18, RND3, ANTXR1, C9ORF72, PTPRF, FLRT2, PALMD, PDPN, PALM, NTRK2, FZD4, FNDC3B, KRT8, FN1, LAMB1, ZEB2, MARCKS, PALLD, MYO5B, CDH11, AGRN, FERMT2	246	1139	20010	1.99961	0.975818	0.012877	0.0118112
	GOTERM_BP_FAT	GO:0009893~positive regulation of metabolic process	70	26.1194	0.0007918	NRP1, SPON1, LPGAT1, CSF1, IRS1, FMR1, FGF1, ADRA1A, ANTXR1, GHR, AKAP12, CASP12, BMPER, CREB3L1, SH3PXD2B, TIMP2, RSPO1, SOX4, ANXA2, PEG3, DAPK1, IGFBP4, SLC2A13, MMD2, VASH1, ZEB2, MMP14, ADRB3, FNDC1, ALDH1A2, GAS6, JDP2, DDR2, RBMS3, MEG3, LRP1, SRC, GM12248, NPR3, THBS1, C9ORF72, SLC5A3, NPAS2, OAS1G, IGFBP6, WNT4, NTRK2, WWTR1, PRNP, AFAP1L2, JUN, GSN, FZD2, IFI204, FZD4, CAV2, LUM, CAV1, …	246	3934	20010	1.44736	0.975856	0.012877	0.0118112
	GOTERM_BP_FAT	GO:0022607~cellular component assembly	57	21.2687	0.000796886	NRP1, STEAP4, COL16A1, TENM4, FMR1, AQP5, PTPRK, ANTXR1, PCSK5, PALM, SH3PXD2B, CD34, TGM2, ANXA2, KRT8, DNM1, MTSS2, MMP14, PALLD, ALDH1A2, CDH11, PKP2, GAS6, TNXB, LRP1, SRC, ARHGAP18, THBS2, C9ORF72, OAS1G, ADAMTS16, LIMA1, SRPX2, FLRT2, GPC6, WNT4, NTRK2, WWTR1, PRNP, JUN, KIRREL, GSN, CAV2, CAV1, LGI2, FN1, LAMB1, ISG15, SDK1, COL3A1, KRT19, MARCKS, COL1A2, XAF1, AGRN, FERMT2, KCTD12B	246	3021	20010	1.53474	0.976427	0.012915	0.0118461
	GOTERM_BP_FAT	GO:0010604~positive regulation of macromolecule metabolic process	65	24.2537	0.000836374	NRP1, SPON1, CSF1, IRS1, FMR1, FGF1, ADRA1A, ANTXR1, GHR, AKAP12, CASP12, BMPER, CREB3L1, SH3PXD2B, TIMP2, RSPO1, SOX4, ANXA2, PEG3, DAPK1, IGFBP4, SLC2A13, MMD2, VASH1, ZEB2, MMP14, ADRB3, FNDC1, ALDH1A2, GAS6, JDP2, DDR2, RBMS3, MEG3, LRP1, SRC, GM12248, THBS1, NPAS2, IGFBP6, WNT4, NTRK2, WWTR1, PRNP, AFAP1L2, JUN, GSN, FZD2, IFI204, FZD4, CAV2, LUM, CAV1, CAVIN3, FN1, IGF1, COL1A1, BMP3, MARCK…	246	3586	20010	1.4744	0.980424	0.0135084	0.0123904
	GOTERM_BP_FAT	GO:0032989~cellular component morphogenesis	30	11.194	0.000843816	MEG3, NRP1, LAMA2, LRP1, TENM4, SEMA3C, SRC, ARHGAP18, RND3, ANTXR1, C9ORF72, PTPRF, FLRT2, PALMD, PDPN, PALM, NTRK2, FZD4, FNDC3B, KRT8, FN1, LAMB1, ZEB2, KRT19, MARCKS, PALLD, MYO5B, CDH11, AGRN, FERMT2	246	1264	20010	1.93057	0.981097	0.013582	0.0124578
	GOTERM_BP_FAT	GO:1901653~cellular response to peptide	14	5.22388	0.000851496	PRNP, LRP1, CAV2, SRC, IRS1, CAV1, ANXA5, IGF1, SOGA1, PTPRF, GHR, MARCKS, PDK4, FBN1	246	379	20010	3.0047	0.981768	0.0136588	0.0125283
	GOTERM_BP_FAT	GO:0045667~regulation of osteoblast differentiation	9	3.35821	0.000883411	IFITM3, WWTR1, IFI204, FNDC3B, ID3, IGF1, FERMT2, WNT4, DDR2	246	162	20010	4.51897	0.98431	0.0140824	0.0129169
	GOTERM_BP_FAT	GO:0045216~cell-cell junction organization	12	4.47761	0.000886408	NRP1, MMP14, KIRREL, COL16A1, LRP1, SRC, CAV1, CDH11, PKP2, PTPRK, FERMT2, WNT4	246	288	20010	3.38923	0.98453	0.0140824	0.0129169
	GOTERM_BP_FAT	GO:0007492~endoderm development	7	2.61194	0.000886894	MMP14, COL4A2, COL5A1, MMP2, COL5A2, COL6A1, FN1	246	91	20010	6.25704	0.984565	0.0140824	0.0129169
	GOTERM_BP_FAT	GO:0051056~regulation of small GTPase mediated signal transduction	11	4.10448	0.000944616	NRP1, COL3A1, CSF1, SRC, TIMP2, ARHGAP18, MMD2, IGF1, ADRA1A, FGF10, TGM2	246	246	20010	3.63722	0.988236	0.0149485	0.0137112
	GOTERM_BP_FAT	GO:0046903~secretion	28	10.4478	0.00096109	MEG3, LRP1, IRS1, FMR1, NPR3, AQP5, ADRA1A, C9ORF72, ADCY5, SCRN1, CNR1, CREB3L1, NNAT, SNCG, CCN3, CD34, SOX4, ABCC3, NTRK2, ANXA2, FZD4, LGI3, CAV1, ANXA5, IGF1, MYO5B, FGF10, FBN1	246	1154	20010	1.97362	0.989114	0.0151581	0.0139036
	GOTERM_BP_FAT	GO:0007264~small GTPase mediated signal transduction	15	5.59701	0.000974657	NRP1, JUN, CSF1, SRC, ARHGAP18, MMD2, IGF1, RND3, ADRA1A, COL3A1, COL1A2, PDPN, TIMP2, FGF10, TGM2	246	434	20010	2.81134	0.989787	0.0153207	0.0140527
	GOTERM_BP_FAT	GO:0010812~negative regulation of cell-substrate adhesion	6	2.23881	0.00104144	COL1A1, MMP14, LRP1, SRC, FZD4, THBS1	246	63	20010	7.74681	0.992541	0.016316	0.0149656
	GOTERM_BP_FAT	GO:0022617~extracellular matrix disassembly	5	1.86567	0.0010544	ADAMTS5, ADAMTS15, PDPN, SH3PXD2B, DDR2	246	37	20010	10.9921	0.992983	0.0164641	0.0151014
	GOTERM_BP_FAT	GO:0040013~negative regulation of locomotion	14	5.22388	0.00107073	IFITM3, NRP1, LRP1, SEMA3C, CAV1, SERPINF1, PTPRK, VASH1, THBS1, COL3A1, PKP2, EMILIN2, CCN3, WNT4	246	389	20010	2.92746	0.993501	0.0166636	0.0152844
	GOTERM_BP_FAT	GO:0003007~heart morphogenesis	12	4.47761	0.00107878	NRP1, JUN, FZD2, FLRT2, SEMA3C, COL5A1, ADAMTS1, ALDH1A2, PKP2, THBS1, DHRS3, SOX4	246	295	20010	3.30881	0.993743	0.0167335	0.0153486
	GOTERM_BP_FAT	GO:0043901~negative regulation of multi-organism process	10	3.73134	0.00109464	IFITM3, JUN, GSN, ANXA2, IFI204, HTRA1, ISG15, PLAT, IGF1, OAS1G	246	208	20010	3.91065	0.994193	0.0169237	0.015523
	GOTERM_BP_FAT	GO:1903035~negative regulation of response to wounding	7	2.61194	0.00111051	ANXA2, MUC16, ANXA5, PLAT, THBS1, CD34, WNT4	246	95	20010	5.99358	0.994611	0.0171127	0.0156964
	GOTERM_BP_FAT	GO:0030324~lung development	11	4.10448	0.00113403	MEG3, ADAMTS2, COL3A1, MMP14, SPARC, ALDH1A2, PDPN, FNDC3B, IGF1, FGF1, FGF10	246	252	20010	3.55062	0.995176	0.0174181	0.0159765
	GOTERM_BP_FAT	GO:0008015~blood circulation	17	6.34328	0.00116112	AOC3, GSN, CAV1, MMP2, NPR3, SOD3, ADRA1A, AKAP12, ADAMTS16, COL1A2, ADRB3, CNR1, PKP2, AGRN, GAS6, CD34, FERMT2	246	544	20010	2.54192	0.995753	0.0177541	0.0162846
	GOTERM_BP_FAT	GO:0045444~fat cell differentiation	11	4.10448	0.00116717	WWTR1, STEAP4, ADRB3, SH3PXD2B, FNDC3B, IGF1, JDP2, FERMT2, FGF10, FBN1, MEDAG	246	253	20010	3.53659	0.995872	0.0177541	0.0162846
	GOTERM_BP_FAT	GO:1902003~regulation of beta-amyloid formation	5	1.86567	0.00116724	PRNP, NTRK2, SPON1, SLC2A13, IGF1	246	38	20010	10.7028	0.995874	0.0177541	0.0162846
	GOTERM_BP_FAT	GO:0031346~positive regulation of cell projection organization	16	5.97015	0.00119039	NTRK2, NRP1, LRP1, SRC, FMR1, SERPINF1, FN1, PTPRF, ZEB2, MARCKS, EFEMP1, CNR1, ADAMTS1, MYO5B, PALM, AGRN	246	494	20010	2.63454	0.9963	0.0180479	0.0165541
	GOTERM_BP_FAT	GO:0060828~regulation of canonical Wnt signaling pathway	11	4.10448	0.00120693	COL1A1, WWTR1, ZEB2, SRC, FZD4, CAV1, RSPO1, SOX4, BICC1, FGF10, RBMS3	246	254	20010	3.52266	0.996577	0.0182398	0.0167301
	GOTERM_BP_FAT	GO:0001954~positive regulation of cell-matrix adhesion	6	2.23881	0.00128545	NRP1, COL16A1, CSF1, PCSK5, FERMT2, WNT4	246	66	20010	7.39468	0.997635	0.0193641	0.0177614
	GOTERM_BP_FAT	GO:0043010~camera-type eye development	14	5.22388	0.00136786	NTRK2, NRP1, JUN, FZD4, SERPINF1, AQP5, SDK1, ZEB2, RCN1, EFEMP1, COL4A1, ALDH1A2, FBN1, FGF10	246	400	20010	2.84695	0.998395	0.0203931	0.0187053
	GOTERM_BP_FAT	GO:0032147~activation of protein kinase activity	10	3.73134	0.00137286	GHR, PRNP, SRC, IGF1, IGFBP6, FGF1, GAS6, THBS1, FGF10, FBN1	246	215	20010	3.78332	0.998432	0.0203931	0.0187053
	GOTERM_BP_FAT	GO:0070613~regulation of protein processing	7	2.61194	0.001375	SPON1, MMP14, GSN, SRC, FMR1, PLAT, THBS1	246	99	20010	5.75142	0.998448	0.0203931	0.0187053
	GOTERM_BP_FAT	GO:0001570~vasculogenesis	7	2.61194	0.001375	NTRK2, NRP1, FZD4, CAV1, ACKR3, FGF1, CD34	246	99	20010	5.75142	0.998448	0.0203931	0.0187053
	GOTERM_BP_FAT	GO:0014911~positive regulation of smooth muscle cell migration	6	2.23881	0.00137545	LRP1, ADAMTS1, SRC, IGF1, PCSK5, DDR2	246	67	20010	7.28431	0.998451	0.0203931	0.0187053
	GOTERM_BP_FAT	GO:0071345~cellular response to cytokine stimulus	26	9.70149	0.00138492	IFITM3, ECM1, CSF1, SRC, ADAMTS12, THBS1, PTPRF, OAS1G, AKAP12, GHR, GSN, IFI204, DAPK1, FZD4, CAV1, KRT8, FN1, ISG15, PCOLCE, IIGP1, COL1A1, F830016B08RIK, GBP11, ACKR3, GM4951, GAS6	246	1063	20010	1.98954	0.998519	0.020469	0.0187749
	GOTERM_BP_FAT	GO:0071634~regulation of transforming growth factor beta production	5	1.86567	0.00141779	LAPTM4B, LUM, FN1, THBS1, CD34	246	40	20010	10.1677	0.998731	0.0208891	0.0191602
	GOTERM_BP_FAT	GO:0052547~regulation of peptidase activity	15	5.59701	0.00146328	ITIH5, ECM1, GSN, IFI204, DAPK1, SRC, CAV1, SERPINF1, IGF1, THBS1, ANTXR1, CASP12, TIMP2, SERPINH1, GAS6	246	453	20010	2.69343	0.998976	0.0214919	0.0197131
	GOTERM_BP_FAT	GO:1903317~regulation of protein maturation	7	2.61194	0.00152404	SPON1, MMP14, GSN, SRC, FMR1, PLAT, THBS1	246	101	20010	5.63753	0.999231	0.0223146	0.0204677
	GOTERM_BP_FAT	GO:0060350~endochondral bone morphogenesis	6	2.23881	0.00167339	GHR, COL1A1, COL3A1, MMP14, SERPINH1, THBS1	246	70	20010	6.97213	0.999619	0.0243718	0.0223547
	GOTERM_BP_FAT	GO:0031344~regulation of cell projection organization	22	8.20896	0.00167491	NTRK2, NRP1, PRNP, LRP1, SEMA3C, SRC, CAV1, FMR1, SERPINF1, FN1, PTPRF, ADAMTS16, SDK1, ZEB2, MARCKS, EFEMP1, CNR1, ADAMTS1, MYO5B, PDPN, PALM, AGRN	246	843	20010	2.12279	0.999622	0.0243718	0.0223547
	GOTERM_BP_FAT	GO:1902991~regulation of amyloid precursor protein catabolic process	5	1.86567	0.00170359	PRNP, NTRK2, SPON1, SLC2A13, IGF1	246	42	20010	9.68351	0.99967	0.0247126	0.0226673
	GOTERM_BP_FAT	GO:0010594~regulation of endothelial cell migration	9	3.35821	0.00173279	NRP1, SPARC, SRPX2, BMPER, SERPINF1, IGF1, VASH1, FGF1, THBS1	246	180	20010	4.06707	0.999712	0.0250588	0.0229848
	GOTERM_BP_FAT	GO:0044344~cellular response to fibroblast growth factor stimulus	7	2.61194	0.00177027	COL1A1, FLRT2, CREB3L1, FGF1, THBS1, WNT4, FGF10	246	104	20010	5.47491	0.999759	0.0253889	0.0232876
	GOTERM_BP_FAT	GO:1904754~positive regulation of vascular associated smooth muscle cell migration	4	1.49254	0.00177182	LRP1, ADAMTS1, PCSK5, DDR2	246	20	20010	16.2683	0.99976	0.0253889	0.0232876
	GOTERM_BP_FAT	GO:1902430~negative regulation of beta-amyloid formation	4	1.49254	0.00177182	PRNP, NTRK2, SPON1, IGF1	246	20	20010	16.2683	0.99976	0.0253889	0.0232876
	GOTERM_BP_FAT	GO:0007596~blood coagulation	9	3.35821	0.00179346	ANXA2, ANXA5, PDPN, FN1, EMILIN2, PLAT, GAS6, THBS1, CD34	246	181	20010	4.0446	0.999784	0.0256209	0.0235003
	GOTERM_BP_FAT	GO:0031667~response to nutrient levels	17	6.34328	0.0018125	JUN, GSN, SPARC, IFI204, SRC, MTHFR, GSTT1, C2, GHR, COL1A1, ADRB3, CNR1, ALDH1A2, PDK4, GAS6, FBN1, WNT4	246	569	20010	2.43024	0.999802	0.0258144	0.0236779
	GOTERM_BP_FAT	GO:0030336~negative regulation of cell migration	12	4.47761	0.00185314	IFITM3, COL3A1, LRP1, CAV1, SERPINF1, PKP2, EMILIN2, CCN3, PTPRK, VASH1, THBS1, WNT4	246	316	20010	3.08892	0.999837	0.0263129	0.0241351
	GOTERM_BP_FAT	GO:0014910~regulation of smooth muscle cell migration	7	2.61194	0.0018587	LRP1, ADAMTS1, SRC, CAV1, IGF1, PCSK5, DDR2	246	105	20010	5.42276	0.999841	0.0263129	0.0241351
	GOTERM_BP_FAT	GO:0032940~secretion by cell	24	8.95522	0.00192424	MEG3, NTRK2, LRP1, ANXA2, IRS1, FZD4, FMR1, LGI3, ANXA5, IGF1, C9ORF72, ADRA1A, ADCY5, SCRN1, CNR1, CREB3L1, MYO5B, NNAT, SNCG, CCN3, CD34, SOX4, FBN1, FGF10	246	969	20010	2.01465	0.999883	0.027159	0.0249111
	GOTERM_BP_FAT	GO:0033273~response to vitamin	7	2.61194	0.00195043	COL1A1, SPARC, GSN, ALDH1A2, MTHFR, GSTT1, GAS6	246	106	20010	5.37161	0.999897	0.0274462	0.0251746
	GOTERM_BP_FAT	GO:0071375~cellular response to peptide hormone stimulus	12	4.47761	0.00195911	GHR, MARCKS, CAV2, SRC, IRS1, CAV1, ANXA5, PDK4, IGF1, SOGA1, PTPRF, FBN1	246	318	20010	3.06949	0.999901	0.027486	0.0252111
	GOTERM_BP_FAT	GO:0071230~cellular response to amino acid stimulus	9	3.35821	0.00199258	COL1A1, NTRK2, COL3A1, COL1A2, COL16A1, COL4A1, MMP2, COL5A2, COL6A1	246	184	20010	3.97866	0.999915	0.0278724	0.0255655
	GOTERM_BP_FAT	GO:0046579~positive regulation of Ras protein signal transduction	6	2.23881	0.00201616	COL3A1, CSF1, SRC, MMD2, IGF1, FGF10	246	73	20010	6.6856	0.999924	0.0280353	0.025715
	GOTERM_BP_FAT	GO:0001960~negative regulation of cytokine-mediated signaling pathway	6	2.23881	0.00201616	ECM1, CAV1, ISG15, GAS6, PTPRF, OAS1G	246	73	20010	6.6856	0.999924	0.0280353	0.025715
	GOTERM_BP_FAT	GO:0031325~positive regulation of cellular metabolic process	64	23.8806	0.00202824	NRP1, SPON1, LPGAT1, CSF1, IRS1, FMR1, FGF1, ADRA1A, ANTXR1, GHR, AKAP12, CASP12, BMPER, CREB3L1, TIMP2, RSPO1, SOX4, ANXA2, PEG3, DAPK1, IGFBP4, SLC2A13, MMD2, ZEB2, MMP14, ADRB3, FNDC1, GAS6, JDP2, DDR2, RBMS3, MEG3, LRP1, SRC, GM12248, THBS1, C9ORF72, SLC5A3, NPAS2, OAS1G, IGFBP6, WNT4, NTRK2, WWTR1, PRNP, AFAP1L2, JUN, GSN, FZD2, IFI204, FZD4, CAV2, LUM, CAV1, CAVIN3, IGF1, COL1A1, BMP3, MARC…	246	3640	20010	1.43018	0.999928	0.0281202	0.0257928
	GOTERM_BP_FAT	GO:0007009~plasma membrane organization	14	5.22388	0.00204713	PRNP, LRP1, ANXA2, AHNAK, CAV2, CAV1, MTSS2, MMP14, COL5A1, MYO5B, PALM, PKP2, AGRN, GAS6	246	418	20010	2.72436	0.999934	0.0282986	0.0259564
	GOTERM_BP_FAT	GO:0014902~myotube differentiation	8	2.98507	0.0020912	MEG3, ADAMTS5, ADAMTS15, MMP14, CAV2, CCN3, IGF1, PTGFRN	246	145	20010	4.4878	0.999947	0.0288229	0.0264374
	GOTERM_BP_FAT	GO:1902531~regulation of intracellular signal transduction	38	14.1791	0.00214004	NRP1, TNXB, LRP1, CSF1, SRC, ARHGAP18, FGF1, THBS1, ADRA1A, C9ORF72, AKAP12, GHR, BMPER, CREB3L1, TIMP2, CCN3, IGFBP6, SOX4, TGM2, NTRK2, PRNP, JUN, IGFBP4, FZD4, CAV2, CAV1, CAVIN3, FN1, MMD2, IGF1, ZEB2, COL3A1, ADRB3, ACKR3, GAS6, FERMT2, FGF10, DDR2	246	1857	20010	1.6645	0.999958	0.0294099	0.0269758
	GOTERM_BP_FAT	GO:0097252~oligodendrocyte apoptotic process	3	1.1194	0.00216807	AKAP12, IGF1, GAS6	246	6	20010	40.6707	0.999963	0.0297082	0.0272494
	GOTERM_BP_FAT	GO:0071902~positive regulation of protein serine/threonine kinase activity	11	4.10448	0.00222508	GHR, ZEB2, MARCKS, SRC, FZD4, IGF1, IGFBP6, FGF1, THBS1, FERMT2, FGF10	246	276	20010	3.24187	0.999972	0.0303127	0.0278039
	GOTERM_BP_FAT	GO:0050730~regulation of peptidyl-tyrosine phosphorylation	11	4.10448	0.00222508	GHR, PRNP, NRP1, CAV2, SRC, CAV1, IGF1, AGRN, GAS6, ADRA1A, FGF10	246	276	20010	3.24187	0.999972	0.0303127	0.0278039
	GOTERM_BP_FAT	GO:0043406~positive regulation of MAP kinase activity	9	3.35821	0.00226768	GHR, ZEB2, SRC, FZD4, IGF1, IGFBP6, FGF1, THBS1, FGF10	246	188	20010	3.89401	0.999977	0.0308038	0.0282543
	GOTERM_BP_FAT	GO:1902992~negative regulation of amyloid precursor protein catabolic process	4	1.49254	0.00235072	PRNP, NTRK2, SPON1, IGF1	246	22	20010	14.7894	0.999984	0.0317482	0.0291206
	GOTERM_BP_FAT	GO:2000209~regulation of anoikis	4	1.49254	0.00235072	NTRK2, SRC, CAV1, PDK4	246	22	20010	14.7894	0.999984	0.0317482	0.0291206
	GOTERM_BP_FAT	GO:0032103~positive regulation of response to external stimulus	13	4.85075	0.00236756	AOC3, NRP1, LRP1, CSF1, FN1, PLAT, THBS1, CNR1, EMILIN2, GAS6, FBN1, FGF10, TGM2	246	375	20010	2.81984	0.999986	0.031884	0.0292451
	GOTERM_BP_FAT	GO:1901890~positive regulation of cell junction assembly	5	1.86567	0.00239074	NRP1, COL16A1, CAV1, FERMT2, WNT4	246	46	20010	8.84146	0.999987	0.0320128	0.0293632
	GOTERM_BP_FAT	GO:1904645~response to beta-amyloid	5	1.86567	0.00239074	PRNP, LRP1, MMP2, IGF1, DNM1	246	46	20010	8.84146	0.999987	0.0320128	0.0293632
	GOTERM_BP_FAT	GO:0090263~positive regulation of canonical Wnt signaling pathway	7	2.61194	0.00246149	COL1A1, ZEB2, SRC, CAV1, RSPO1, SOX4, FGF10	246	111	20010	5.12964	0.999991	0.0327734	0.0300609
	GOTERM_BP_FAT	GO:0071774~response to fibroblast growth factor	7	2.61194	0.00246149	COL1A1, FLRT2, CREB3L1, FGF1, THBS1, WNT4, FGF10	246	111	20010	5.12964	0.999991	0.0327734	0.0300609
	GOTERM_BP_FAT	GO:0007584~response to nutrient	9	3.35821	0.00250725	COL1A1, SPARC, GSN, CNR1, ALDH1A2, MTHFR, GSTT1, GAS6, C2	246	191	20010	3.83284	0.999993	0.0332884	0.0305332
	GOTERM_BP_FAT	GO:0043200~response to amino acid	10	3.73134	0.00252711	COL1A1, NTRK2, COL3A1, COL1A2, COL16A1, COL4A1, MMP2, COL5A2, COL6A1, MTHFR	246	235	20010	3.46134	0.999993	0.0334576	0.0306884
	GOTERM_BP_FAT	GO:0043434~response to peptide hormone	15	5.59701	0.00253474	SPARC, CAV2, SRC, IRS1, CAV1, ANXA5, IGF1, SOGA1, PTPRF, GHR, COL1A1, COL3A1, MARCKS, PDK4, FBN1	246	481	20010	2.53664	0.999993	0.0334643	0.0306946
	GOTERM_BP_FAT	GO:0060761~negative regulation of response to cytokine stimulus	6	2.23881	0.00254951	ECM1, CAV1, ISG15, GAS6, PTPRF, OAS1G	246	77	20010	6.3383	0.999994	0.033565	0.0307869
	GOTERM_BP_FAT	GO:0050680~negative regulation of epithelial cell proliferation	9	3.35821	0.0025882	RIAN, SPARC, MUC16, CAV2, CAV1, SERPINF1, PTPRK, VASH1, THBS1	246	192	20010	3.81288	0.999995	0.0337924	0.0309956
	GOTERM_BP_FAT	GO:0034205~beta-amyloid formation	5	1.86567	0.00258836	PRNP, NTRK2, SPON1, SLC2A13, IGF1	246	47	20010	8.65335	0.999995	0.0337924	0.0309956
	GOTERM_BP_FAT	GO:0030574~collagen catabolic process	5	1.86567	0.00258836	MRC2, ADAMTS2, MMP14, CTSK, MMP2	246	47	20010	8.65335	0.999995	0.0337924	0.0309956
	GOTERM_BP_FAT	GO:0060541~respiratory system development	11	4.10448	0.00265493	MEG3, ADAMTS2, COL3A1, MMP14, SPARC, ALDH1A2, PDPN, FNDC3B, IGF1, FGF1, FGF10	246	283	20010	3.16168	0.999996	0.0345656	0.0317048
	GOTERM_BP_FAT	GO:2000146~negative regulation of cell motility	12	4.47761	0.00266775	IFITM3, COL3A1, LRP1, CAV1, SERPINF1, PKP2, EMILIN2, CCN3, PTPRK, VASH1, THBS1, WNT4	246	331	20010	2.94894	0.999996	0.0346365	0.0317698
	GOTERM_BP_FAT	GO:2001044~regulation of integrin-mediated signaling pathway	4	1.49254	0.00267908	LAMA2, LAMB1, NID1, PCSK5	246	23	20010	14.1463	0.999997	0.0346394	0.0317724
	GOTERM_BP_FAT	GO:0045666~positive regulation of neuron differentiation	15	5.59701	0.00268271	NTRK2, NRP1, LRP1, FMR1, SERPINF1, FN1, MMD2, PTPRF, ZEB2, MARCKS, CNR1, ADAMTS1, MYO5B, PALM, TIMP2	246	484	20010	2.52091	0.999997	0.0346394	0.0317724
	GOTERM_BP_FAT	GO:0008543~fibroblast growth factor receptor signaling pathway	6	2.23881	0.00269743	FLRT2, CREB3L1, FGF1, THBS1, WNT4, FGF10	246	78	20010	6.25704	0.999997	0.034734	0.0318592
	GOTERM_BP_FAT	GO:0010976~positive regulation of neuron projection development	13	4.85075	0.00272203	NTRK2, NRP1, LRP1, FMR1, SERPINF1, FN1, PTPRF, ZEB2, MARCKS, CNR1, ADAMTS1, MYO5B, PALM	246	382	20010	2.76816	0.999997	0.0349136	0.0320239
	GOTERM_BP_FAT	GO:0045598~regulation of fat cell differentiation	8	2.98507	0.00272623	WWTR1, SH3PXD2B, FNDC3B, IGF1, JDP2, FERMT2, FBN1, MEDAG	246	152	20010	4.28113	0.999997	0.0349136	0.0320239
	GOTERM_BP_FAT	GO:0098609~cell-cell adhesion	24	8.95522	0.00274798	PRNP, GSN, KIRREL, TNXB, TENM4, SRC, CAV1, FN1, LAMB1, IGF1, THBS1, PTPRF, SDK1, CD1D1, SRPX2, PALLD, PDPN, CDH11, PKP2, EMILIN2, CCN3, CD34, GPC6, SOX4	246	996	20010	1.96004	0.999998	0.0350965	0.0321917
	GOTERM_BP_FAT	GO:0044243~multicellular organismal catabolic process	5	1.86567	0.0027969	MRC2, ADAMTS2, MMP14, CTSK, MMP2	246	48	20010	8.47307	0.999998	0.0355282	0.0325877
	GOTERM_BP_FAT	GO:0043277~apoptotic cell clearance	5	1.86567	0.0027969	LRP1, GAS6, THBS1, C2, TGM2	246	48	20010	8.47307	0.999998	0.0355282	0.0325877
	GOTERM_BP_FAT	GO:0043405~regulation of MAP kinase activity	11	4.10448	0.00286313	GHR, ZEB2, TNXB, SRC, FZD4, CAV1, IGF1, IGFBP6, FGF1, THBS1, FGF10	246	286	20010	3.12852	0.999999	0.0362714	0.0332694
	GOTERM_BP_FAT	GO:0050920~regulation of chemotaxis	10	3.73134	0.00290537	NRP1, CSF1, SEMA3C, FN1, CCN3, AGRN, FGF1, GAS6, THBS1, FGF10	246	240	20010	3.38923	0.999999	0.0367076	0.0336695
	GOTERM_BP_FAT	GO:0060349~bone morphogenesis	7	2.61194	0.00293802	GHR, COL1A1, COL3A1, MMP14, SERPINH1, THBS1, DHRS3	246	115	20010	4.95122	0.999999	0.0369397	0.0338824
	GOTERM_BP_FAT	GO:0010770~positive regulation of cell morphogenesis involved in differentiation	9	3.35821	0.00293946	NTRK2, NRP1, ZEB2, MARCKS, LRP1, MYO5B, FN1, PTPRF, FERMT2	246	196	20010	3.73507	0.999999	0.0369397	0.0338824
	GOTERM_BP_FAT	GO:0043086~negative regulation of catalytic activity	19	7.08955	0.00296688	ITIH5, AOC3, WWTR1, PRNP, ECM1, IFI204, SRC, CAV1, SERPINF1, NPR3, IGF1, THBS1, CNR1, PALM, TIMP2, SERPINH1, AGRN, GAS6, DDR2	246	711	20010	2.17368	0.999999	0.0371849	0.0341073
	GOTERM_BP_FAT	GO:0061564~axon development	16	5.97015	0.00298929	MEG3, NTRK2, NRP1, JUN, LAMA2, LRP1, SEMA3C, MMP2, FN1, C9ORF72, ZEB2, FLRT2, CNR1, MYO5B, CDH11, AGRN	246	543	20010	2.3968	0.999999	0.0373661	0.0342734
	GOTERM_BP_FAT	GO:0001957~intramembranous ossification	3	1.1194	0.00301082	COL1A1, CTSK, MMP2	246	7	20010	34.8606	0.999999	0.0374361	0.0343376
	GOTERM_BP_FAT	GO:0036072~direct ossification	3	1.1194	0.00301082	COL1A1, CTSK, MMP2	246	7	20010	34.8606	0.999999	0.0374361	0.0343376
	GOTERM_BP_FAT	GO:0060445~branching involved in salivary gland morphogenesis	4	1.49254	0.00303435	NRP1, SEMA3C, FGF10, TGM2	246	24	20010	13.5569	0.999999	0.0376291	0.0345147
	GOTERM_BP_FAT	GO:0044092~negative regulation of molecular function	25	9.32836	0.00305887	ITIH5, ECM1, SRC, FMR1, NPR3, THBS1, C9ORF72, PTPRF, CNR1, PALM, TIMP2, SERPINH1, AOC3, WWTR1, PRNP, JUN, IFI204, ANXA2, SERPINF1, CAV1, IGF1, ID3, AGRN, GAS6, DDR2	246	1067	20010	1.90584	0.999999	0.0378334	0.0347021
	GOTERM_BP_FAT	GO:0007417~central nervous system development	26	9.70149	0.00316694	NRP1, LRP1, TENM4, SRC, FMR1, FAIM2, NNAT, TIMP2, SOX4, WNT4, NTRK2, GSN, FZD4, LAMB1, IGF1, ZEB2, VCAN, COL3A1, MARCKS, COL4A1, ALDH1A2, CDH11, ID3, ACKR3, LHX6, FGF10	246	1131	20010	1.86992	1	0.0390673	0.0358338
	GOTERM_BP_FAT	GO:0010718~positive regulation of epithelial to mesenchymal transition	5	1.86567	0.00324792	COL1A1, WWTR1, PDPN, FERMT2, LOXL2	246	50	20010	8.13415	1	0.0399614	0.0366539
	GOTERM_BP_FAT	GO:1903530~regulation of secretion by cell	19	7.08955	0.0032845	NTRK2, LRP1, ANXA2, IRS1, FMR1, LGI3, ANXA5, IGF1, C9ORF72, ADRA1A, ADCY5, CNR1, MYO5B, NNAT, SNCG, CCN3, CD34, SOX4, FBN1	246	717	20010	2.15549	1	0.0403059	0.03697
	GOTERM_BP_FAT	GO:0009991~response to extracellular stimulus	17	6.34328	0.00333305	JUN, GSN, SPARC, IFI204, SRC, MTHFR, GSTT1, C2, GHR, COL1A1, ADRB3, CNR1, ALDH1A2, PDK4, GAS6, FBN1, WNT4	246	605	20010	2.28563	1	0.0407537	0.0373807
	GOTERM_BP_FAT	GO:0002062~chondrocyte differentiation	7	2.61194	0.00333834	ECM1, COL3A1, EFEMP1, SERPINH1, CCN3, ADAMTS12, LOXL2	246	118	20010	4.82534	1	0.0407537	0.0373807
	GOTERM_BP_FAT	GO:1903670~regulation of sprouting angiogenesis	6	2.23881	0.00335171	NRP1, SRPX2, BMPER, CREB3L1, FGF1, THBS1	246	82	20010	5.95181	1	0.040811	0.0374333
	GOTERM_BP_FAT	GO:0033622~integrin activation	4	1.49254	0.00341723	COL16A1, FN1, PCSK5, FERMT2	246	25	20010	13.0146	1	0.0415012	0.0380663
	GOTERM_BP_FAT	GO:0003205~cardiac chamber development	9	3.35821	0.00342723	NRP1, FZD2, LRP1, SEMA3C, ADAMTS1, PKP2, PCSK5, DHRS3, SOX4	246	201	20010	3.64216	1	0.0415154	0.0380794
	GOTERM_BP_FAT	GO:0030195~negative regulation of blood coagulation	5	1.86567	0.00349098	ANXA2, ANXA5, PLAT, THBS1, CD34	246	51	20010	7.97465	1	0.0420708	0.0385888
	GOTERM_BP_FAT	GO:1903053~regulation of extracellular matrix organization	5	1.86567	0.00349098	TNXB, PDPN, AEBP1, ANTXR1, DDR2	246	51	20010	7.97465	1	0.0420708	0.0385888
	GOTERM_BP_FAT	GO:0044085~cellular component biogenesis	58	21.6418	0.00355401	NRP1, STEAP4, COL16A1, TENM4, FMR1, AQP5, PTPRK, ANTXR1, PCSK5, PALM, SH3PXD2B, CD34, TGM2, ANXA2, KRT8, DNM1, MTSS2, MMP14, PALLD, ALDH1A2, CDH11, PKP2, GAS6, TNXB, LRP1, SRC, ARHGAP18, THBS2, C9ORF72, OAS1G, ADAMTS16, LIMA1, SRPX2, FLRT2, GPC6, WNT4, NTRK2, WWTR1, PRNP, JUN, KIRREL, GSN, CAV2, CAV1, LGI2, FN1, LAMB1, ISG15, SDK1, COL3A1, KRT19, MARCKS, COL1A2, MYO5B, XAF1, AGRN, FERMT2, KCTD12B	246	3295	20010	1.43181	1	0.0427208	0.039185
	GOTERM_BP_FAT	GO:0006796~phosphate-containing compound metabolic process	57	21.2687	0.00358121	NRP1, LPGAT1, CSF1, IRS1, FMR1, PTPRK, FGF1, ADRA1A, PTPRF, GHR, AKAP12, EFEMP1, BMPER, PALM, PDK4, TIMP2, RSPO1, ANXA2, DAPK1, IGFBP4, HUNK, MMD2, ZEB2, VCAN, ADRB3, FNDC1, GAS6, DDR2, TNXB, LRP1, SRC, PLPPR3, GM12248, NPR3, THBS1, C9ORF72, ADCY5, SRPX2, IGFBP6, NTRK2, WWTR1, PRNP, JUN, KIRREL, FZD4, CAV2, CAV1, CAVIN3, FN1, IGF1, BMP3, MARCKS, ACKR3, AGRN, FERMT2, FBN1, FGF10	246	3225	20010	1.43766	1	0.042938	0.0393842
	GOTERM_BP_FAT	GO:0008286~insulin receptor signaling pathway	7	2.61194	0.0036269	MARCKS, CAV2, SRC, IRS1, PDK4, SOGA1, PTPRF	246	120	20010	4.74492	1	0.0433751	0.0397852
	GOTERM_BP_FAT	GO:0001666~response to hypoxia	12	4.47761	0.00365253	MMP14, FNDC1, SRC, CAV1, MMP2, MTHFR, PLOD2, PLAT, SOD3, CD34, SOX4, LOXL2	246	345	20010	2.82927	1	0.0435708	0.0399647
	GOTERM_BP_FAT	GO:0019058~viral life cycle	12	4.47761	0.00372717	IFITM3, NRP1, JUN, GSN, IFI204, CAV2, CAV1, FMR1, ISG15, GAS6, PCSK5, OAS1G	246	346	20010	2.82109	1	0.0443486	0.040678
	GOTERM_BP_FAT	GO:1900047~negative regulation of hemostasis	5	1.86567	0.00374611	ANXA2, ANXA5, PLAT, THBS1, CD34	246	52	20010	7.82129	1	0.0444614	0.0407815
	GOTERM_BP_FAT	GO:0042246~tissue regeneration	6	2.23881	0.00391218	IGSF10, GSN, CCN3, IGF1, PTGFRN, FGF10	246	85	20010	5.74175	1	0.0463155	0.0424822
	GOTERM_BP_FAT	GO:0048732~gland development	16	5.97015	0.00393655	MEG3, NRP1, JUN, CSF1, SEMA3C, SRC, IRS1, CAV1, MMP2, SERPINF1, IGF1, FGF1, ALDH1A2, WNT4, FGF10, TGM2	246	560	20010	2.32404	1	0.0464138	0.0425723
	GOTERM_BP_FAT	GO:0070482~response to oxygen levels	14	5.22388	0.00394024	SRC, CAV1, MMP2, MTHFR, PLOD2, PLAT, SOD3, LOXL2, COL1A1, MMP14, FNDC1, PDPN, CD34, SOX4	246	452	20010	2.51943	1	0.0464138	0.0425723
	GOTERM_BP_FAT	GO:0051146~striated muscle cell differentiation	12	4.47761	0.00397633	MEG3, ADAMTS5, ADAMTS15, MMP14, KRT19, COL14A1, CAV2, KRT8, CCN3, IGF1, PTGFRN, ADRA1A	246	349	20010	2.79684	1	0.0466727	0.0428098
	GOTERM_BP_FAT	GO:0060510~Type II pneumocyte differentiation	3	1.1194	0.00398208	FNDC3B, IGF1, FGF10	246	8	20010	30.503	1	0.0466727	0.0428098
	GOTERM_BP_FAT	GO:0050819~negative regulation of coagulation	5	1.86567	0.00401359	ANXA2, ANXA5, PLAT, THBS1, CD34	246	53	20010	7.67372	1	0.046925	0.0430412
	GOTERM_BP_FAT	GO:0051147~regulation of muscle cell differentiation	10	3.73134	0.00410257	MEG3, MMP14, LAMA2, COL14A1, ID3, CCN3, LAMB1, IGF1, NID1, SOX4	246	253	20010	3.21508	1	0.0478464	0.0438863
	GOTERM_BP_FAT	GO:0003151~outflow tract morphogenesis	6	2.23881	0.00411305	NRP1, JUN, FZD2, SEMA3C, THBS1, DHRS3	246	86	20010	5.67499	1	0.0478499	0.0438896
	GOTERM_BP_FAT	GO:0001974~blood vessel remodeling	5	1.86567	0.00429369	LRP1, SEMA3C, IGF1, FGF10, TGM2	246	54	20010	7.53162	1	0.0498281	0.045704
	GOTERM_BP_FAT	GO:0050878~regulation of body fluid levels	13	4.85075	0.00430513	ANXA2, CAV1, ANXA5, NPR3, FN1, PLAT, AQP5, THBS1, PDPN, EMILIN2, GAS6, CD34, FGF10	246	404	20010	2.61742	1	0.0498377	0.0457128
	GOTERM_BP_FAT	GO:0044419~interspecies interaction between organisms	20	7.46269	0.00442101	IFITM3, NRP1, SPON2, JUN, GSN, MGL2, IFI204, ANXA2, CAV2, SRC, CAV1, CD209F, FMR1, CD209G, HTRA1, FN1, ISG15, PCSK5, OAS1G, GAS6	246	797	20010	2.04119	1	0.0509629	0.0467449
	GOTERM_BP_FAT	GO:0007265~Ras protein signal transduction	12	4.47761	0.00442401	NRP1, COL3A1, JUN, COL1A2, CSF1, SRC, PDPN, TIMP2, MMD2, IGF1, ADRA1A, FGF10	246	354	20010	2.75734	1	0.0509629	0.0467449
	GOTERM_BP_FAT	GO:0050807~regulation of synapse organization	9	3.35821	0.00446025	NTRK2, MARCKS, SPARC, SRPX2, FLRT2, FMR1, THBS2, AGRN, GPC6	246	210	20010	3.48606	1	0.0512547	0.0470125
[truncated: 1,661 more rows]

## Sheet: CV vs CS & OV vs OS common DEGs
	Category	Term	Count	%	PValue	Genes	List Total	Pop Hits	Pop Total	Fold Enrichment	Bonferroni	Benjamini	FDR
[truncated: 2,482 more rows]

## Sheet: CV vs CS & AV vs AS common DEGs
	Category	Term	Count	%	PValue	Genes	List Total	Pop Hits	Pop Total	Fold Enrichment	Bonferroni	Benjamini	FDR	Corresponding to figure S6D
[truncated: 4,910 more rows]

[truncated: 2 more sheets: OV vs CV & AV vs CV common DEGs, OS vs CS & AS vs CS common DEGs]
