# Supplementary material for: Mechanic Insight into the Distinct and Common Roles of Ovariectomy Versus Adrenalectomy on Adipose Tissue Remodeling in Female Mice
Source: Int J Mol Sci. 2023 Jan 24;24(3):2308. doi: 10.3390/ijms24032308 (PMC9916485; doi:10.3390/ijms24032308)
Supplement: Supplementary file 1 [file ijms-24-02308-s001.zip › Table S3 Common regulated DEGs by both OVX and ADX.xlsx]

## Sheet: OS vs CS & OV vs CV common DEGs
gene_id	gene_name	type	Corresponding to figure S2A
ENSMUSG00000042041	2010003K11Rik	Common up (Quadrant 1)
ENSMUSG00000030249	Abcc9	Common up (Quadrant 1)
ENSMUSG00000038007	Acer2	Common up (Quadrant 1)
ENSMUSG00000042429	Adora1	Common up (Quadrant 1)
ENSMUSG00000024747	Aldh1a7	Common up (Quadrant 1)
ENSMUSG00000037010	Apln	Common up (Quadrant 1)
ENSMUSG00000057315	Arhgap24	Common up (Quadrant 1)
ENSMUSG00000059811	Atl2	Common up (Quadrant 1)
ENSMUSG00000032452	Clstn2	Common up (Quadrant 1)
ENSMUSG00000039782	Cpeb2	Common up (Quadrant 1)
ENSMUSG00000033488	Cryzl2	Common up (Quadrant 1)
ENSMUSG00000032911	Cspg4	Common up (Quadrant 1)
ENSMUSG00000031924	Cyb5b	Common up (Quadrant 1)
ENSMUSG00000044083	Efcab8	Common up (Quadrant 1)
ENSMUSG00000054690	Emcn	Common up (Quadrant 1)
ENSMUSG00000027533	Fabp5	Common up (Quadrant 1)
ENSMUSG00000100862	Gm10925	Common up (Quadrant 1)
ENSMUSG00000086584	Gm12002	Common up (Quadrant 1)
ENSMUSG00000101111	Gm28437	Common up (Quadrant 1)
ENSMUSG00000102070	Gm28661	Common up (Quadrant 1)
ENSMUSG00000110344	Gm45716	Common up (Quadrant 1)
ENSMUSG00000027669	Gnb4	Common up (Quadrant 1)
ENSMUSG00000023019	Gpd1	Common up (Quadrant 1)
ENSMUSG00000090523	Gypc	Common up (Quadrant 1)
ENSMUSG00000035376	Hacd2	Common up (Quadrant 1)
ENSMUSG00000006611	Hfe	Common up (Quadrant 1)
ENSMUSG00000003949	Hlf	Common up (Quadrant 1)
ENSMUSG00000032279	Idh3a	Common up (Quadrant 1)
ENSMUSG00000027111	Itga6	Common up (Quadrant 1)
ENSMUSG00000030087	Klf15	Common up (Quadrant 1)
ENSMUSG00000049327	Kmt5a	Common up (Quadrant 1)
ENSMUSG00000032401	Lctl	Common up (Quadrant 1)
ENSMUSG00000030246	Ldhb	Common up (Quadrant 1)
ENSMUSG00000020593	Lpin1	Common up (Quadrant 1)
ENSMUSG00000054720	Lrrc8c	Common up (Quadrant 1)
ENSMUSG00000045776	Lrtm1	Common up (Quadrant 1)
ENSMUSG00000053907	Mat2a	Common up (Quadrant 1)
ENSMUSG00000031442	Mcf2l	Common up (Quadrant 1)
ENSMUSG00000018169	Mfng	Common up (Quadrant 1)
ENSMUSG00000020190	Mknk2	Common up (Quadrant 1)
ENSMUSG00000039956	Mrap	Common up (Quadrant 1)
ENSMUSG00000064354	mt-Co2	Common up (Quadrant 1)
ENSMUSG00000064358	mt-Co3	Common up (Quadrant 1)
ENSMUSG00000064339	mt-Rnr2	Common up (Quadrant 1)
ENSMUSG00000064372	mt-Tp	Common up (Quadrant 1)
ENSMUSG00000002341	Ncan	Common up (Quadrant 1)
ENSMUSG00000021775	Nr1d2	Common up (Quadrant 1)
ENSMUSG00000045620	Odf3l1	Common up (Quadrant 1)
ENSMUSG00000026672	Optn	Common up (Quadrant 1)
ENSMUSG00000051596	Otop1	Common up (Quadrant 1)
ENSMUSG00000018846	Pank3	Common up (Quadrant 1)
ENSMUSG00000055866	Per2	Common up (Quadrant 1)
ENSMUSG00000045102	Poln	Common up (Quadrant 1)
ENSMUSG00000000440	Pparg	Common up (Quadrant 1)
ENSMUSG00000049999	Ppp1r3d	Common up (Quadrant 1)
ENSMUSG00000041696	Rasl12	Common up (Quadrant 1)
ENSMUSG00000026678	Rgs5	Common up (Quadrant 1)
ENSMUSG00000028557	Rnf11	Common up (Quadrant 1)
ENSMUSG00000009378	Slc16a12	Common up (Quadrant 1)
ENSMUSG00000024935	Slc1a1	Common up (Quadrant 1)
ENSMUSG00000098188	Sowahc	Common up (Quadrant 1)
ENSMUSG00000063060	Sox7	Common up (Quadrant 1)
ENSMUSG00000049303	Syt12	Common up (Quadrant 1)
ENSMUSG00000056313	Tcim	Common up (Quadrant 1)
ENSMUSG00000041737	Tmem45b	Common up (Quadrant 1)
ENSMUSG00000072235	Tuba1a	Common up (Quadrant 1)
ENSMUSG00000024924	Vldlr	Common up (Quadrant 1)
ENSMUSG00000066687	Zbtb16	Common up (Quadrant 1)
ENSMUSG00000021701	Plk2	VAT_up SAT_down (Quadrant 2)
ENSMUSG00000027750	Postn	VAT_up SAT_down (Quadrant 2)
ENSMUSG00000023915	Tnfrsf21	VAT_up SAT_down (Quadrant 2)
ENSMUSG00000044017	Adgrd1	Common down (Quadrant 3)
ENSMUSG00000020473	Aebp1	Common down (Quadrant 3)
ENSMUSG00000037138	Aff3	Common down (Quadrant 3)
ENSMUSG00000031980	Agt	Common down (Quadrant 3)
ENSMUSG00000027597	Ahcy	Common down (Quadrant 3)
ENSMUSG00000025955	Akr1cl	Common down (Quadrant 3)
ENSMUSG00000031075	Ano1	Common down (Quadrant 3)
ENSMUSG00000057346	Apol9a	Common down (Quadrant 3)
ENSMUSG00000068246	Apol9b	Common down (Quadrant 3)
ENSMUSG00000044217	Aqp5	Common down (Quadrant 3)
ENSMUSG00000033161	Atp1a1	Common down (Quadrant 3)
ENSMUSG00000002602	Axl	Common down (Quadrant 3)
ENSMUSG00000036887	C1qa	Common down (Quadrant 3)
ENSMUSG00000036905	C1qb	Common down (Quadrant 3)
ENSMUSG00000036896	C1qc	Common down (Quadrant 3)
ENSMUSG00000073418	C4b	Common down (Quadrant 3)
ENSMUSG00000032373	Car12	Common down (Quadrant 3)
ENSMUSG00000009185	Ccl8	Common down (Quadrant 3)
ENSMUSG00000027656	Ccn5	Common down (Quadrant 3)
ENSMUSG00000051906	Cd209f	Common down (Quadrant 3)
ENSMUSG00000024610	Cd74	Common down (Quadrant 3)
ENSMUSG00000071637	Cebpd	Common down (Quadrant 3)
ENSMUSG00000001128	Cfp	Common down (Quadrant 3)
ENSMUSG00000036596	Cpz	Common down (Quadrant 3)
ENSMUSG00000024621	Csf1r	Common down (Quadrant 3)
ENSMUSG00000020186	Csrp2	Common down (Quadrant 3)
ENSMUSG00000032359	Ctsh	Common down (Quadrant 3)
ENSMUSG00000038642	Ctss	Common down (Quadrant 3)
ENSMUSG00000018920	Cxcl16	Common down (Quadrant 3)
ENSMUSG00000018008	Cyth4	Common down (Quadrant 3)
ENSMUSG00000052117	D630039A03Rik	Common down (Quadrant 3)
ENSMUSG00000037868	Egr2	Common down (Quadrant 3)
ENSMUSG00000028967	Errfi1	Common down (Quadrant 3)
ENSMUSG00000052397	Ezr	Common down (Quadrant 3)
ENSMUSG00000052934	Fbxo31	Common down (Quadrant 3)
ENSMUSG00000037816	Fbxw17	Common down (Quadrant 3)
ENSMUSG00000068699	Flnc	Common down (Quadrant 3)
ENSMUSG00000032725	Folr2	Common down (Quadrant 3)
ENSMUSG00000021250	Fos	Common down (Quadrant 3)
ENSMUSG00000031451	Gas6	Common down (Quadrant 3)
ENSMUSG00000086962	Gm12248	Common down (Quadrant 3)
ENSMUSG00000078117	Gm16485	Common down (Quadrant 3)
ENSMUSG00000018339	Gpx3	Common down (Quadrant 3)
ENSMUSG00000036523	Greb1	Common down (Quadrant 3)
ENSMUSG00000073421	H2-Ab1	Common down (Quadrant 3)
ENSMUSG00000060586	H2-Eb1	Common down (Quadrant 3)
ENSMUSG00000067212	H2-T23	Common down (Quadrant 3)
ENSMUSG00000039628	Hs3st6	Common down (Quadrant 3)
ENSMUSG00000006205	Htra1	Common down (Quadrant 3)
ENSMUSG00000026536	Ifi211	Common down (Quadrant 3)
ENSMUSG00000073491	Ifi213	Common down (Quadrant 3)
ENSMUSG00000023046	Igfbp6	Common down (Quadrant 3)
ENSMUSG00000054072	Iigp1	Common down (Quadrant 3)
ENSMUSG00000002897	Il17ra	Common down (Quadrant 3)
ENSMUSG00000030748	Il4ra	Common down (Quadrant 3)
ENSMUSG00000003477	Inmt	Common down (Quadrant 3)
ENSMUSG00000055980	Irs1	Common down (Quadrant 3)
ENSMUSG00000035692	Isg15	Common down (Quadrant 3)
ENSMUSG00000023243	Kcnk5	Common down (Quadrant 3)
ENSMUSG00000020911	Krt19	Common down (Quadrant 3)
ENSMUSG00000049382	Krt8	Common down (Quadrant 3)
ENSMUSG00000040249	Lrp1	Common down (Quadrant 3)
ENSMUSG00000074622	Mafb	Common down (Quadrant 3)
ENSMUSG00000039533	Mmd2	Common down (Quadrant 3)
ENSMUSG00000046805	Mpeg1	Common down (Quadrant 3)
ENSMUSG00000033763	Mtss2	Common down (Quadrant 3)
ENSMUSG00000022346	Myc	Common down (Quadrant 3)
ENSMUSG00000028654	Mycl	Common down (Quadrant 3)
ENSMUSG00000025885	Myo5b	Common down (Quadrant 3)
ENSMUSG00000041120	Nbl1	Common down (Quadrant 3)
ENSMUSG00000032661	Oas3	Common down (Quadrant 3)
ENSMUSG00000048387	Osr1	Common down (Quadrant 3)
ENSMUSG00000006931	P3h4	Common down (Quadrant 3)
ENSMUSG00000051048	P4ha3	Common down (Quadrant 3)
ENSMUSG00000044641	Pard6b	Common down (Quadrant 3)
ENSMUSG00000031870	Pgr	Common down (Quadrant 3)
ENSMUSG00000025017	Pik3ap1	Common down (Quadrant 3)
ENSMUSG00000041202	Pla2g2d	Common down (Quadrant 3)
ENSMUSG00000032374	Plod2	Common down (Quadrant 3)
ENSMUSG00000035835	Plppr3	Common down (Quadrant 3)
ENSMUSG00000057729	Prtn3	Common down (Quadrant 3)
ENSMUSG00000056529	Ptafr	Common down (Quadrant 3)
ENSMUSG00000017969	Ptgis	Common down (Quadrant 3)
ENSMUSG00000034573	Ptpn13	Common down (Quadrant 3)
ENSMUSG00000030854	Ptpn5	Common down (Quadrant 3)
ENSMUSG00000030222	Rerg	Common down (Quadrant 3)
ENSMUSG00000057322	Rpl38	Common down (Quadrant 3)
ENSMUSG00000007892	Rplp1	Common down (Quadrant 3)
ENSMUSG00000034892	Rps29	Common down (Quadrant 3)
ENSMUSG00000028871	Rspo1	Common down (Quadrant 3)
ENSMUSG00000034009	Rxfp1	Common down (Quadrant 3)
ENSMUSG00000027322	Siglec1	Common down (Quadrant 3)
ENSMUSG00000024042	Sik1	Common down (Quadrant 3)
ENSMUSG00000020733	Slc9a3r1	Common down (Quadrant 3)
ENSMUSG00000000204	Slfn4	Common down (Quadrant 3)
ENSMUSG00000056427	Slit3	Common down (Quadrant 3)
ENSMUSG00000047793	Sned1	Common down (Quadrant 3)
ENSMUSG00000020027	Socs2	Common down (Quadrant 3)
ENSMUSG00000070034	Sp110	Common down (Quadrant 3)
ENSMUSG00000058297	Spock2	Common down (Quadrant 3)
ENSMUSG00000037379	Spon2	Common down (Quadrant 3)
ENSMUSG00000020961	Ston2	Common down (Quadrant 3)
ENSMUSG00000037321	Tap1	Common down (Quadrant 3)
ENSMUSG00000040152	Thbs1	Common down (Quadrant 3)
ENSMUSG00000054675	Tmem119	Common down (Quadrant 3)
ENSMUSG00000036856	Wnt4	Common down (Quadrant 3)
ENSMUSG00000018849	Wwc1	Common down (Quadrant 3)
ENSMUSG00000027514	Zbp1	Common down (Quadrant 3)
ENSMUSG00000048485	Zbtb8b	Common down (Quadrant 3)
ENSMUSG00000044786	Zfp36	Common down (Quadrant 3)
ENSMUSG00000040829	Zmynd15	Common down (Quadrant 3)
ENSMUSG00000033849	B3galt2	VAT_down SAT_up (Quadrant 4)
ENSMUSG00000005360	Slc1a3	VAT_down SAT_up (Quadrant 4)
ENSMUSG00000029093	Sorcs2	VAT_down SAT_up (Quadrant 4)

## Sheet: AS vs CS & AV vs CV common DEGs
gene_id	gene_name	type	Corresponding to figure S5A
ENSMUSG00000001467	Cyp51	Common up (Quadrant 1)
ENSMUSG00000003528	Slc25a1	Common up (Quadrant 1)
ENSMUSG00000005057	Sh2b2	Common up (Quadrant 1)
ENSMUSG00000005800	Mmp8	Common up (Quadrant 1)
ENSMUSG00000006494	Pdk1	Common up (Quadrant 1)
ENSMUSG00000006517	Mvd	Common up (Quadrant 1)
ENSMUSG00000006784	Odad4	Common up (Quadrant 1)
ENSMUSG00000017801	Mlx	Common up (Quadrant 1)
ENSMUSG00000019763	Rmnd1	Common up (Quadrant 1)
ENSMUSG00000020532	Acaca	Common up (Quadrant 1)
ENSMUSG00000021236	Entpd5	Common up (Quadrant 1)
ENSMUSG00000021327	Zkscan3	Common up (Quadrant 1)
ENSMUSG00000021591	Glrx	Common up (Quadrant 1)
ENSMUSG00000022707	Gbe1	Common up (Quadrant 1)
ENSMUSG00000023078	Cxcl13	Common up (Quadrant 1)
ENSMUSG00000023832	Acat2	Common up (Quadrant 1)
ENSMUSG00000023861	Mpc1	Common up (Quadrant 1)
ENSMUSG00000024014	Pim1	Common up (Quadrant 1)
ENSMUSG00000024222	Fkbp5	Common up (Quadrant 1)
ENSMUSG00000024526	Cidea	Common up (Quadrant 1)
ENSMUSG00000024556	Me2	Common up (Quadrant 1)
ENSMUSG00000025153	Fasn	Common up (Quadrant 1)
ENSMUSG00000026567	Adcy10	Common up (Quadrant 1)
ENSMUSG00000026922	Agpat2	Common up (Quadrant 1)
ENSMUSG00000027339	Rassf2	Common up (Quadrant 1)
ENSMUSG00000027510	Rbm38	Common up (Quadrant 1)
ENSMUSG00000027533	Fabp5	Common up (Quadrant 1)
ENSMUSG00000027901	Dennd2d	Common up (Quadrant 1)
ENSMUSG00000028636	Ppcs	Common up (Quadrant 1)
ENSMUSG00000030935	Acsm3	Common up (Quadrant 1)
ENSMUSG00000031167	Rbm3	Common up (Quadrant 1)
ENSMUSG00000031604	Msmo1	Common up (Quadrant 1)
ENSMUSG00000031628	Casp3	Common up (Quadrant 1)
ENSMUSG00000032418	Me1	Common up (Quadrant 1)
ENSMUSG00000032484	Ngp	Common up (Quadrant 1)
ENSMUSG00000033762	Recql4	Common up (Quadrant 1)
ENSMUSG00000034593	Myo5a	Common up (Quadrant 1)
ENSMUSG00000034981	Parm1	Common up (Quadrant 1)
ENSMUSG00000035686	Thrsp	Common up (Quadrant 1)
ENSMUSG00000036832	Lpar3	Common up (Quadrant 1)
ENSMUSG00000037685	Atp8a1	Common up (Quadrant 1)
ENSMUSG00000037686	Aspg	Common up (Quadrant 1)
ENSMUSG00000038357	Camp	Common up (Quadrant 1)
ENSMUSG00000038754	Elovl3	Common up (Quadrant 1)
ENSMUSG00000040111	Gramd1b	Common up (Quadrant 1)
ENSMUSG00000040809	Chil3	Common up (Quadrant 1)
ENSMUSG00000040907	Atp1a3	Common up (Quadrant 1)
ENSMUSG00000041220	Elovl6	Common up (Quadrant 1)
ENSMUSG00000041235	Chd7	Common up (Quadrant 1)
ENSMUSG00000042010	Acacb	Common up (Quadrant 1)
ENSMUSG00000042041	2010003K11Rik	Common up (Quadrant 1)
ENSMUSG00000042444	Mindy2	Common up (Quadrant 1)
ENSMUSG00000044037	Als2cl	Common up (Quadrant 1)
ENSMUSG00000045294	Insig1	Common up (Quadrant 1)
ENSMUSG00000045917	Tmem268	Common up (Quadrant 1)
ENSMUSG00000046027	Stard5	Common up (Quadrant 1)
ENSMUSG00000049313	Sorl1	Common up (Quadrant 1)
ENSMUSG00000049555	Tmie	Common up (Quadrant 1)
ENSMUSG00000050276	Mrgprg	Common up (Quadrant 1)
ENSMUSG00000050379	Septin6	Common up (Quadrant 1)
ENSMUSG00000052212	Cd177	Common up (Quadrant 1)
ENSMUSG00000053846	Lipg	Common up (Quadrant 1)
ENSMUSG00000056054	S100a8	Common up (Quadrant 1)
ENSMUSG00000056071	S100a9	Common up (Quadrant 1)
ENSMUSG00000056234	Ncoa4	Common up (Quadrant 1)
ENSMUSG00000056413	Adap1	Common up (Quadrant 1)
ENSMUSG00000057722	Lepr	Common up (Quadrant 1)
ENSMUSG00000058258	Idi1	Common up (Quadrant 1)
ENSMUSG00000058624	Gda	Common up (Quadrant 1)
ENSMUSG00000062609	Kcnj15	Common up (Quadrant 1)
ENSMUSG00000063524	Eno1	Common up (Quadrant 1)
ENSMUSG00000064354	mt-Co2	Common up (Quadrant 1)
ENSMUSG00000066440	Zfyve26	Common up (Quadrant 1)
ENSMUSG00000066441	Rdh11	Common up (Quadrant 1)
ENSMUSG00000067235	H2-Q10	Common up (Quadrant 1)
ENSMUSG00000074604	Mgst2	Common up (Quadrant 1)
ENSMUSG00000076538	Igkv13-84	Common up (Quadrant 1)
ENSMUSG00000076583	Igkv8-24	Common up (Quadrant 1)
ENSMUSG00000076591	Igkv8-16	Common up (Quadrant 1)
ENSMUSG00000076612	Ighg2c	Common up (Quadrant 1)
ENSMUSG00000076614	Ighg1	Common up (Quadrant 1)
ENSMUSG00000076615	Ighg3	Common up (Quadrant 1)
ENSMUSG00000076672	Ighv3-6	Common up (Quadrant 1)
ENSMUSG00000076934	Iglv1	Common up (Quadrant 1)
ENSMUSG00000076940	Iglv2	Common up (Quadrant 1)
ENSMUSG00000094198	Ighv1-50	Common up (Quadrant 1)
ENSMUSG00000094345	Igkv14-126	Common up (Quadrant 1)
ENSMUSG00000094546	Ighv1-26	Common up (Quadrant 1)
ENSMUSG00000094561	Ighv1-22	Common up (Quadrant 1)
ENSMUSG00000095079	Igha	Common up (Quadrant 1)
ENSMUSG00000095127	Ighv1-82	Common up (Quadrant 1)
ENSMUSG00000095204	Ighv1-52	Common up (Quadrant 1)
ENSMUSG00000095285	Ighv5-9	Common up (Quadrant 1)
ENSMUSG00000095630	Igkv6-23	Common up (Quadrant 1)
ENSMUSG00000096108	Ighv11-2	Common up (Quadrant 1)
ENSMUSG00000096490	Igkv10-94	Common up (Quadrant 1)
ENSMUSG00000096632	Igkv9-124	Common up (Quadrant 1)
ENSMUSG00000102888	Ighv1-11	Common up (Quadrant 1)
ENSMUSG00000103149	AA914427	Common up (Quadrant 1)
ENSMUSG00000105906	Iglc1	Common up (Quadrant 1)
ENSMUSG00000111942	Gm5182	Common up (Quadrant 1)
ENSMUSG00000000296	Tpd52l1	VAT_up SAT_down (Quadrant 2)
ENSMUSG00000001508	Sgca	VAT_up SAT_down (Quadrant 2)
ENSMUSG00000004558	Ndrg2	VAT_up SAT_down (Quadrant 2)
ENSMUSG00000005268	Prlr	VAT_up SAT_down (Quadrant 2)
ENSMUSG00000017978	Cadps2	VAT_up SAT_down (Quadrant 2)
ENSMUSG00000019194	Scn1b	VAT_up SAT_down (Quadrant 2)
ENSMUSG00000019312	Grb7	VAT_up SAT_down (Quadrant 2)
ENSMUSG00000019368	Sec14l4	VAT_up SAT_down (Quadrant 2)
ENSMUSG00000020821	Kif1c	VAT_up SAT_down (Quadrant 2)
ENSMUSG00000022358	Fbxo32	VAT_up SAT_down (Quadrant 2)
ENSMUSG00000022548	Apod	VAT_up SAT_down (Quadrant 2)
ENSMUSG00000022887	Masp1	VAT_up SAT_down (Quadrant 2)
ENSMUSG00000026473	Glul	VAT_up SAT_down (Quadrant 2)
ENSMUSG00000027257	Pacsin3	VAT_up SAT_down (Quadrant 2)
ENSMUSG00000027624	Epb41l1	VAT_up SAT_down (Quadrant 2)
ENSMUSG00000028132	Tlcd4	VAT_up SAT_down (Quadrant 2)
ENSMUSG00000028328	Tmod1	VAT_up SAT_down (Quadrant 2)
ENSMUSG00000028756	Pink1	VAT_up SAT_down (Quadrant 2)
ENSMUSG00000028865	Cd164l2	VAT_up SAT_down (Quadrant 2)
ENSMUSG00000030256	Bhlhe41	VAT_up SAT_down (Quadrant 2)
ENSMUSG00000030688	Stard10	VAT_up SAT_down (Quadrant 2)
ENSMUSG00000030717	Nupr1	VAT_up SAT_down (Quadrant 2)
ENSMUSG00000031636	Pdlim3	VAT_up SAT_down (Quadrant 2)
ENSMUSG00000031785	Adgrg1	VAT_up SAT_down (Quadrant 2)
ENSMUSG00000032796	Lama1	VAT_up SAT_down (Quadrant 2)
ENSMUSG00000033065	Pfkm	VAT_up SAT_down (Quadrant 2)
ENSMUSG00000034460	Six4	VAT_up SAT_down (Quadrant 2)
ENSMUSG00000035296	Sgcg	VAT_up SAT_down (Quadrant 2)
ENSMUSG00000038150	Ormdl3	VAT_up SAT_down (Quadrant 2)
ENSMUSG00000038400	Pmepa1	VAT_up SAT_down (Quadrant 2)
ENSMUSG00000066705	Fxyd6	VAT_up SAT_down (Quadrant 2)
ENSMUSG00000070509	Rgma	VAT_up SAT_down (Quadrant 2)
ENSMUSG00000072949	Acot1	VAT_up SAT_down (Quadrant 2)
ENSMUSG00000085211	B430219N15Rik	VAT_up SAT_down (Quadrant 2)
ENSMUSG00000000058	Cav2	Common down (Quadrant 3)
ENSMUSG00000000753	Serpinf1	Common down (Quadrant 3)
ENSMUSG00000000838	Fmr1	Common down (Quadrant 3)
ENSMUSG00000000957	Mmp14	Common down (Quadrant 3)
ENSMUSG00000001025	S100a6	Common down (Quadrant 3)
ENSMUSG00000001119	Col6a1	Common down (Quadrant 3)
ENSMUSG00000001506	Col1a1	Common down (Quadrant 3)
ENSMUSG00000001663	Gstt1	Common down (Quadrant 3)
ENSMUSG00000002265	Peg3	Common down (Quadrant 3)
ENSMUSG00000002831	Plin4	Common down (Quadrant 3)
ENSMUSG00000002847	Pla1a	Common down (Quadrant 3)
ENSMUSG00000002900	Lamb1	Common down (Quadrant 3)
ENSMUSG00000004098	Col5a3	Common down (Quadrant 3)
ENSMUSG00000005397	Nid1	Common down (Quadrant 3)
ENSMUSG00000005973	Rcn1	Common down (Quadrant 3)
ENSMUSG00000006205	Htra1	Common down (Quadrant 3)
ENSMUSG00000006403	Adamts4	Common down (Quadrant 3)
ENSMUSG00000007655	Cav1	Common down (Quadrant 3)
ENSMUSG00000007872	Id3	Common down (Quadrant 3)
ENSMUSG00000012428	Steap4	Common down (Quadrant 3)
ENSMUSG00000013584	Aldh1a2	Common down (Quadrant 3)
ENSMUSG00000014329	Bicc1	Common down (Quadrant 3)
ENSMUSG00000014599	Csf1	Common down (Quadrant 3)
ENSMUSG00000015852	Fcrls	Common down (Quadrant 3)
ENSMUSG00000016494	Cd34	Common down (Quadrant 3)
ENSMUSG00000017144	Rnd3	Common down (Quadrant 3)
ENSMUSG00000017466	Timp2	Common down (Quadrant 3)
ENSMUSG00000017493	Igfbp4	Common down (Quadrant 3)
ENSMUSG00000017754	Pltp	Common down (Quadrant 3)
ENSMUSG00000018339	Gpx3	Common down (Quadrant 3)
ENSMUSG00000018593	Sparc	Common down (Quadrant 3)
ENSMUSG00000019124	Scrn1	Common down (Quadrant 3)
ENSMUSG00000019326	Aoc3	Common down (Quadrant 3)
ENSMUSG00000019577	Pdk4	Common down (Quadrant 3)
ENSMUSG00000019889	Ptprk	Common down (Quadrant 3)
ENSMUSG00000019899	Lama2	Common down (Quadrant 3)
ENSMUSG00000020053	Igf1	Common down (Quadrant 3)
ENSMUSG00000020057	Dram1	Common down (Quadrant 3)
ENSMUSG00000020241	Col6a2	Common down (Quadrant 3)
ENSMUSG00000020251	Glt8d2	Common down (Quadrant 3)
ENSMUSG00000020467	Efemp1	Common down (Quadrant 3)
ENSMUSG00000020473	Aebp1	Common down (Quadrant 3)
ENSMUSG00000020695	Mrc2	Common down (Quadrant 3)
ENSMUSG00000020865	Abcc3	Common down (Quadrant 3)
ENSMUSG00000020911	Krt19	Common down (Quadrant 3)
ENSMUSG00000021256	Vash1	Common down (Quadrant 3)
ENSMUSG00000021268	Meg3	Common down (Quadrant 3)
ENSMUSG00000021390	Ogn	Common down (Quadrant 3)
ENSMUSG00000021559	Dapk1	Common down (Quadrant 3)
ENSMUSG00000021614	Vcan	Common down (Quadrant 3)
ENSMUSG00000021732	Fgf10	Common down (Quadrant 3)
ENSMUSG00000021806	Nid2	Common down (Quadrant 3)
ENSMUSG00000022098	Bmp1	Common down (Quadrant 3)
ENSMUSG00000022203	Efs	Common down (Quadrant 3)
ENSMUSG00000022206	Npr3	Common down (Quadrant 3)
ENSMUSG00000022257	Laptm4b	Common down (Quadrant 3)
ENSMUSG00000022371	Col14a1	Common down (Quadrant 3)
ENSMUSG00000022440	C1qtnf6	Common down (Quadrant 3)
ENSMUSG00000022665	Ccdc80	Common down (Quadrant 3)
ENSMUSG00000022754	Tmem45a	Common down (Quadrant 3)
ENSMUSG00000022816	Fstl1	Common down (Quadrant 3)
ENSMUSG00000022840	Adcy5	Common down (Quadrant 3)
ENSMUSG00000022893	Adamts1	Common down (Quadrant 3)
ENSMUSG00000022894	Adamts5	Common down (Quadrant 3)
ENSMUSG00000023011	Faim2	Common down (Quadrant 3)
ENSMUSG00000023022	Lima1	Common down (Quadrant 3)
ENSMUSG00000023046	Igfbp6	Common down (Quadrant 3)
ENSMUSG00000023064	Sncg	Common down (Quadrant 3)
ENSMUSG00000023885	Thbs2	Common down (Quadrant 3)
ENSMUSG00000024053	Emilin2	Common down (Quadrant 3)
ENSMUSG00000024371	C2	Common down (Quadrant 3)
ENSMUSG00000024538	Ppic	Common down (Quadrant 3)
ENSMUSG00000024713	Pcsk5	Common down (Quadrant 3)
ENSMUSG00000025083	Afap1l2	Common down (Quadrant 3)
ENSMUSG00000025268	Maged2	Common down (Quadrant 3)
ENSMUSG00000025492	Ifitm3	Common down (Quadrant 3)
ENSMUSG00000025780	Itih5	Common down (Quadrant 3)
ENSMUSG00000025810	Nrp1	Common down (Quadrant 3)
ENSMUSG00000025885	Myo5b	Common down (Quadrant 3)
ENSMUSG00000025887	Casp12	Common down (Quadrant 3)
ENSMUSG00000025955	Akr1cl	Common down (Quadrant 3)
ENSMUSG00000026042	Col5a2	Common down (Quadrant 3)
ENSMUSG00000026043	Col3a1	Common down (Quadrant 3)
ENSMUSG00000026077	Npas2	Common down (Quadrant 3)
ENSMUSG00000026193	Fn1	Common down (Quadrant 3)
ENSMUSG00000026255	Efhd1	Common down (Quadrant 3)
ENSMUSG00000026574	Dpt	Common down (Quadrant 3)
ENSMUSG00000026623	Lpgat1	Common down (Quadrant 3)
ENSMUSG00000026674	Ddr2	Common down (Quadrant 3)
ENSMUSG00000026748	Plxdc2	Common down (Quadrant 3)
ENSMUSG00000026825	Dnm1	Common down (Quadrant 3)
ENSMUSG00000026837	Col5a1	Common down (Quadrant 3)
ENSMUSG00000026872	Zeb2	Common down (Quadrant 3)
ENSMUSG00000026879	Gsn	Common down (Quadrant 3)
ENSMUSG00000026890	Lhx6	Common down (Quadrant 3)
ENSMUSG00000027204	Fbn1	Common down (Quadrant 3)
ENSMUSG00000027230	Creb3l1	Common down (Quadrant 3)
ENSMUSG00000027408	Cpxm1	Common down (Quadrant 3)
ENSMUSG00000027646	Src	Common down (Quadrant 3)
ENSMUSG00000027712	Anxa5	Common down (Quadrant 3)
ENSMUSG00000027803	Wwtr1	Common down (Quadrant 3)
ENSMUSG00000027864	Ptgfrn	Common down (Quadrant 3)
ENSMUSG00000028037	Ifi44	Common down (Quadrant 3)
ENSMUSG00000028076	Cd1d1	Common down (Quadrant 3)
ENSMUSG00000028108	Ecm1	Common down (Quadrant 3)
ENSMUSG00000028111	Ctsk	Common down (Quadrant 3)
ENSMUSG00000028300	C9orf72	Common down (Quadrant 3)
ENSMUSG00000028402	Mpdz	Common down (Quadrant 3)
ENSMUSG00000028532	Cachd1	Common down (Quadrant 3)
ENSMUSG00000028583	Pdpn	Common down (Quadrant 3)
ENSMUSG00000028780	Sema3c	Common down (Quadrant 3)
ENSMUSG00000028871	Rspo1	Common down (Quadrant 3)
ENSMUSG00000029009	Mthfr	Common down (Quadrant 3)
ENSMUSG00000029185	Fam114a1	Common down (Quadrant 3)
ENSMUSG00000029335	Bmp3	Common down (Quadrant 3)
ENSMUSG00000029633	Gm5578	Common down (Quadrant 3)
ENSMUSG00000029659	Medag	Common down (Quadrant 3)
ENSMUSG00000029661	Col1a2	Common down (Quadrant 3)
ENSMUSG00000029718	Pcolce	Common down (Quadrant 3)
ENSMUSG00000030108	Slc6a13	Common down (Quadrant 3)
ENSMUSG00000030116	Mfap5	Common down (Quadrant 3)
ENSMUSG00000030495	Slc7a10	Common down (Quadrant 3)
ENSMUSG00000031253	Srpx2	Common down (Quadrant 3)
ENSMUSG00000031274	Col4a5	Common down (Quadrant 3)
ENSMUSG00000031451	Gas6	Common down (Quadrant 3)
ENSMUSG00000031489	Adrb3	Common down (Quadrant 3)
ENSMUSG00000031502	Col4a1	Common down (Quadrant 3)
ENSMUSG00000031503	Col4a2	Common down (Quadrant 3)
ENSMUSG00000031538	Plat	Common down (Quadrant 3)
ENSMUSG00000031673	Cdh11	Common down (Quadrant 3)
ENSMUSG00000031740	Mmp2	Common down (Quadrant 3)
ENSMUSG00000031875	Cmtm3	Common down (Quadrant 3)
ENSMUSG00000031963	Bmper	Common down (Quadrant 3)
ENSMUSG00000032231	Anxa2	Common down (Quadrant 3)
ENSMUSG00000032334	Loxl1	Common down (Quadrant 3)
ENSMUSG00000032374	Plod2	Common down (Quadrant 3)
ENSMUSG00000032531	Amotl2	Common down (Quadrant 3)
ENSMUSG00000032609	Klhdc8b	Common down (Quadrant 3)
ENSMUSG00000033295	Ptprf	Common down (Quadrant 3)
ENSMUSG00000033327	Tnxb	Common down (Quadrant 3)
ENSMUSG00000033377	Palmd	Common down (Quadrant 3)
ENSMUSG00000033420	Antxr1	Common down (Quadrant 3)
ENSMUSG00000033436	Armcx2	Common down (Quadrant 3)
ENSMUSG00000033453	Adamts15	Common down (Quadrant 3)
ENSMUSG00000033595	Lgi3	Common down (Quadrant 3)
ENSMUSG00000033763	Mtss2	Common down (Quadrant 3)
ENSMUSG00000034205	Loxl2	Common down (Quadrant 3)
ENSMUSG00000034271	Jdp2	Common down (Quadrant 3)
ENSMUSG00000034842	Art3	Common down (Quadrant 3)
ENSMUSG00000035279	Ssc5d	Common down (Quadrant 3)
ENSMUSG00000035692	Isg15	Common down (Quadrant 3)
ENSMUSG00000035835	Plppr3	Common down (Quadrant 3)
ENSMUSG00000035863	Palm	Common down (Quadrant 3)
ENSMUSG00000036256	Igfbp7	Common down (Quadrant 3)
ENSMUSG00000036298	Slc2a13	Common down (Quadrant 3)
ENSMUSG00000036334	Igsf10	Common down (Quadrant 3)
ENSMUSG00000036395	Glb1l2	Common down (Quadrant 3)
ENSMUSG00000036412	Arsi	Common down (Quadrant 3)
ENSMUSG00000036446	Lum	Common down (Quadrant 3)
ENSMUSG00000036545	Adamts2	Common down (Quadrant 3)
ENSMUSG00000036585	Fgf1	Common down (Quadrant 3)
ENSMUSG00000036596	Cpz	Common down (Quadrant 3)
ENSMUSG00000036782	Klhl13	Common down (Quadrant 3)
ENSMUSG00000036856	Wnt4	Common down (Quadrant 3)
ENSMUSG00000037060	Cavin3	Common down (Quadrant 3)
ENSMUSG00000037086	Prr32	Common down (Quadrant 3)
ENSMUSG00000037362	Ccn3	Common down (Quadrant 3)
ENSMUSG00000037379	Spon2	Common down (Quadrant 3)
ENSMUSG00000037712	Fermt2	Common down (Quadrant 3)
ENSMUSG00000037816	Fbxw17	Common down (Quadrant 3)
ENSMUSG00000037820	Tgm2	Common down (Quadrant 3)
ENSMUSG00000038156	Spon1	Common down (Quadrant 3)
ENSMUSG00000038366	Lasp1	Common down (Quadrant 3)
ENSMUSG00000038507	Parp12	Common down (Quadrant 3)
ENSMUSG00000038521	C1s1	Common down (Quadrant 3)
ENSMUSG00000038587	Akap12	Common down (Quadrant 3)
ENSMUSG00000039031	Arhgap18	Common down (Quadrant 3)
ENSMUSG00000039252	Lgi2	Common down (Quadrant 3)
ENSMUSG00000039286	Fndc3b	Common down (Quadrant 3)
ENSMUSG00000039405	Prss23	Common down (Quadrant 3)
ENSMUSG00000039533	Mmd2	Common down (Quadrant 3)
ENSMUSG00000039607	Rbms3	Common down (Quadrant 3)
ENSMUSG00000039628	Hs3st6	Common down (Quadrant 3)
ENSMUSG00000039683	Sdk1	Common down (Quadrant 3)
ENSMUSG00000039787	Cercam	Common down (Quadrant 3)
ENSMUSG00000039831	Arhgap29	Common down (Quadrant 3)
ENSMUSG00000039982	Dtx4	Common down (Quadrant 3)
ENSMUSG00000040152	Thbs1	Common down (Quadrant 3)
ENSMUSG00000040249	Lrp1	Common down (Quadrant 3)
ENSMUSG00000040339	Fam102b	Common down (Quadrant 3)
ENSMUSG00000040483	Xaf1	Common down (Quadrant 3)
ENSMUSG00000040690	Col16a1	Common down (Quadrant 3)
ENSMUSG00000040711	Sh3pxd2b	Common down (Quadrant 3)
ENSMUSG00000040950	Mgl2	Common down (Quadrant 3)
ENSMUSG00000041577	Prelp	Common down (Quadrant 3)
ENSMUSG00000041633	Kctd12b	Common down (Quadrant 3)
ENSMUSG00000041734	Kirrel	Common down (Quadrant 3)
ENSMUSG00000041757	Plekha6	Common down (Quadrant 3)
ENSMUSG00000041936	Agrn	Common down (Quadrant 3)
ENSMUSG00000041957	Pkp2	Common down (Quadrant 3)
ENSMUSG00000042331	Specc1	Common down (Quadrant 3)
ENSMUSG00000044217	Aqp5	Common down (Quadrant 3)
ENSMUSG00000044288	Cnr1	Common down (Quadrant 3)
ENSMUSG00000044337	Ackr3	Common down (Quadrant 3)
ENSMUSG00000045875	Adra1a	Common down (Quadrant 3)
ENSMUSG00000047414	Flrt2	Common down (Quadrant 3)
ENSMUSG00000047497	Adamts12	Common down (Quadrant 3)
ENSMUSG00000047528	Flacc1	Common down (Quadrant 3)
ENSMUSG00000047793	Sned1	Common down (Quadrant 3)
ENSMUSG00000048078	Tenm4	Common down (Quadrant 3)
ENSMUSG00000048126	Col6a3	Common down (Quadrant 3)
ENSMUSG00000048485	Zbtb8b	Common down (Quadrant 3)
ENSMUSG00000049382	Krt8	Common down (Quadrant 3)
ENSMUSG00000049538	Adamts16	Common down (Quadrant 3)
ENSMUSG00000049791	Fzd4	Common down (Quadrant 3)
ENSMUSG00000050288	Fzd2	Common down (Quadrant 3)
ENSMUSG00000051906	Cd209f	Common down (Quadrant 3)
ENSMUSG00000052684	Jun	Common down (Quadrant 3)
ENSMUSG00000053414	Hunk	Common down (Quadrant 3)
ENSMUSG00000053617	Sh3pxd2a	Common down (Quadrant 3)
ENSMUSG00000054072	Iigp1	Common down (Quadrant 3)
ENSMUSG00000054619	Mettl7a1	Common down (Quadrant 3)
ENSMUSG00000055172	C1ra	Common down (Quadrant 3)
ENSMUSG00000055254	Ntrk2	Common down (Quadrant 3)
ENSMUSG00000055485	Soga1	Common down (Quadrant 3)
ENSMUSG00000055737	Ghr	Common down (Quadrant 3)
ENSMUSG00000055980	Irs1	Common down (Quadrant 3)
ENSMUSG00000056481	Cd248	Common down (Quadrant 3)
ENSMUSG00000056870	Gulp1	Common down (Quadrant 3)
ENSMUSG00000057346	Apol9a	Common down (Quadrant 3)
ENSMUSG00000058056	Palld	Common down (Quadrant 3)
ENSMUSG00000058571	Gpc6	Common down (Quadrant 3)
ENSMUSG00000059901	Adamts14	Common down (Quadrant 3)
ENSMUSG00000061100	Retnla	Common down (Quadrant 3)
ENSMUSG00000061451	Tmem151a	Common down (Quadrant 3)
ENSMUSG00000062980	Cped1	Common down (Quadrant 3)
ENSMUSG00000064080	Fbln2	Common down (Quadrant 3)
ENSMUSG00000066026	Dhrs3	Common down (Quadrant 3)
ENSMUSG00000066861	Oas1g	Common down (Quadrant 3)
ENSMUSG00000067158	Col4a4	Common down (Quadrant 3)
ENSMUSG00000067786	Nnat	Common down (Quadrant 3)
ENSMUSG00000067787	Blcap	Common down (Quadrant 3)
ENSMUSG00000068245	Phf11d	Common down (Quadrant 3)
ENSMUSG00000068246	Apol9b	Common down (Quadrant 3)
ENSMUSG00000069662	Marcks	Common down (Quadrant 3)
ENSMUSG00000069833	Ahnak	Common down (Quadrant 3)
ENSMUSG00000070436	Serpinh1	Common down (Quadrant 3)
ENSMUSG00000071847	Apcdd1	Common down (Quadrant 3)
ENSMUSG00000071984	Fndc1	Common down (Quadrant 3)
ENSMUSG00000072941	Sod3	Common down (Quadrant 3)
ENSMUSG00000073489	Ifi204	Common down (Quadrant 3)
ENSMUSG00000073555	Gm4951	Common down (Quadrant 3)
ENSMUSG00000075602	Ly6a	Common down (Quadrant 3)
ENSMUSG00000076431	Sox4	Common down (Quadrant 3)
ENSMUSG00000078532	Nkain1	Common down (Quadrant 3)
ENSMUSG00000079037	Prnp	Common down (Quadrant 3)
ENSMUSG00000079057	Cyp4v3	Common down (Quadrant 3)
ENSMUSG00000079168	Cd209g	Common down (Quadrant 3)
ENSMUSG00000081189	Hspd1-ps4	Common down (Quadrant 3)
ENSMUSG00000083443	Gm15519	Common down (Quadrant 3)
ENSMUSG00000086962	Gm12248	Common down (Quadrant 3)
ENSMUSG00000089774	Slc5a3	Common down (Quadrant 3)
ENSMUSG00000090942	F830016B08Rik	Common down (Quadrant 3)
ENSMUSG00000091243	Vgll3	Common down (Quadrant 3)
ENSMUSG00000092021	Gbp11	Common down (Quadrant 3)
ENSMUSG00000094910	D430019H16Rik	Common down (Quadrant 3)
ENSMUSG00000095304	Plac9a	Common down (Quadrant 3)
ENSMUSG00000097451	Rian	Common down (Quadrant 3)
ENSMUSG00000109564	Muc16	Common down (Quadrant 3)
ENSMUSG00000111840	Gm48832	Common down (Quadrant 3)
ENSMUSG00000000682	Cd52	VAT_down SAT_up (Quadrant 4)
ENSMUSG00000001128	Cfp	VAT_down SAT_up (Quadrant 4)
ENSMUSG00000002489	Tiam1	VAT_down SAT_up (Quadrant 4)
ENSMUSG00000002897	Il17ra	VAT_down SAT_up (Quadrant 4)
ENSMUSG00000005087	Cd44	VAT_down SAT_up (Quadrant 4)
ENSMUSG00000015396	Cd83	VAT_down SAT_up (Quadrant 4)
ENSMUSG00000017929	B4galt5	VAT_down SAT_up (Quadrant 4)
ENSMUSG00000018008	Cyth4	VAT_down SAT_up (Quadrant 4)
ENSMUSG00000018507	Trpv2	VAT_down SAT_up (Quadrant 4)
ENSMUSG00000018774	Cd68	VAT_down SAT_up (Quadrant 4)
ENSMUSG00000018819	Lsp1	VAT_down SAT_up (Quadrant 4)
ENSMUSG00000020143	Dock2	VAT_down SAT_up (Quadrant 4)
ENSMUSG00000020189	Osbpl8	VAT_down SAT_up (Quadrant 4)
ENSMUSG00000020437	Myo1g	VAT_down SAT_up (Quadrant 4)
ENSMUSG00000020914	Top2a	VAT_down SAT_up (Quadrant 4)
ENSMUSG00000021356	Irf4	VAT_down SAT_up (Quadrant 4)
ENSMUSG00000021423	Ly86	VAT_down SAT_up (Quadrant 4)
ENSMUSG00000021998	Lcp1	VAT_down SAT_up (Quadrant 4)
ENSMUSG00000022014	Epsti1	VAT_down SAT_up (Quadrant 4)
ENSMUSG00000022037	Clu	VAT_down SAT_up (Quadrant 4)
ENSMUSG00000022221	Ripk3	VAT_down SAT_up (Quadrant 4)
ENSMUSG00000022283	Pabpc1	VAT_down SAT_up (Quadrant 4)
ENSMUSG00000022488	Nckap1l	VAT_down SAT_up (Quadrant 4)
ENSMUSG00000022504	Ciita	VAT_down SAT_up (Quadrant 4)
ENSMUSG00000024054	Smchd1	VAT_down SAT_up (Quadrant 4)
ENSMUSG00000024300	Myo1f	VAT_down SAT_up (Quadrant 4)
ENSMUSG00000024397	Aif1	VAT_down SAT_up (Quadrant 4)
ENSMUSG00000024542	Cep192	VAT_down SAT_up (Quadrant 4)
ENSMUSG00000024590	Lmnb1	VAT_down SAT_up (Quadrant 4)
ENSMUSG00000024610	Cd74	VAT_down SAT_up (Quadrant 4)
ENSMUSG00000024675	Ms4a4c	VAT_down SAT_up (Quadrant 4)
ENSMUSG00000026222	Sp100	VAT_down SAT_up (Quadrant 4)
ENSMUSG00000026395	Ptprc	VAT_down SAT_up (Quadrant 4)
ENSMUSG00000026399	Cd55	VAT_down SAT_up (Quadrant 4)
ENSMUSG00000026430	Rassf5	VAT_down SAT_up (Quadrant 4)
ENSMUSG00000027009	Itga4	VAT_down SAT_up (Quadrant 4)
ENSMUSG00000027322	Siglec1	VAT_down SAT_up (Quadrant 4)
ENSMUSG00000027639	Samhd1	VAT_down SAT_up (Quadrant 4)
ENSMUSG00000027962	Vcam1	VAT_down SAT_up (Quadrant 4)
ENSMUSG00000028480	Glipr2	VAT_down SAT_up (Quadrant 4)
ENSMUSG00000028530	Jak1	VAT_down SAT_up (Quadrant 4)
ENSMUSG00000028581	Laptm5	VAT_down SAT_up (Quadrant 4)
ENSMUSG00000029093	Sorcs2	VAT_down SAT_up (Quadrant 4)
ENSMUSG00000029299	Abcg3	VAT_down SAT_up (Quadrant 4)
ENSMUSG00000029413	Naaa	VAT_down SAT_up (Quadrant 4)
ENSMUSG00000029580	Actb	VAT_down SAT_up (Quadrant 4)
ENSMUSG00000029581	Fscn1	VAT_down SAT_up (Quadrant 4)
ENSMUSG00000029826	Zc3hav1	VAT_down SAT_up (Quadrant 4)
ENSMUSG00000030707	Coro1a	VAT_down SAT_up (Quadrant 4)
ENSMUSG00000030830	Itgal	VAT_down SAT_up (Quadrant 4)
ENSMUSG00000031004	Mki67	VAT_down SAT_up (Quadrant 4)
ENSMUSG00000031093	Dock11	VAT_down SAT_up (Quadrant 4)
ENSMUSG00000031112	Stk26	VAT_down SAT_up (Quadrant 4)
ENSMUSG00000031557	Plekha2	VAT_down SAT_up (Quadrant 4)
ENSMUSG00000032009	Sesn3	VAT_down SAT_up (Quadrant 4)
ENSMUSG00000032359	Ctsh	VAT_down SAT_up (Quadrant 4)
ENSMUSG00000032740	Ccdc88a	VAT_down SAT_up (Quadrant 4)
ENSMUSG00000034028	Cd226	VAT_down SAT_up (Quadrant 4)
ENSMUSG00000034330	Plcg2	VAT_down SAT_up (Quadrant 4)
ENSMUSG00000034438	Gbp8	VAT_down SAT_up (Quadrant 4)
ENSMUSG00000034641	Cd300ld	VAT_down SAT_up (Quadrant 4)
ENSMUSG00000034663	Bmp2k	VAT_down SAT_up (Quadrant 4)
ENSMUSG00000035000	Dpp4	VAT_down SAT_up (Quadrant 4)
ENSMUSG00000035042	Ccl5	VAT_down SAT_up (Quadrant 4)
ENSMUSG00000035208	Slfn8	VAT_down SAT_up (Quadrant 4)
ENSMUSG00000035697	Arhgap45	VAT_down SAT_up (Quadrant 4)
ENSMUSG00000036478	Btg1	VAT_down SAT_up (Quadrant 4)
ENSMUSG00000036594	H2-Aa	VAT_down SAT_up (Quadrant 4)
ENSMUSG00000036943	Rab8b	VAT_down SAT_up (Quadrant 4)
ENSMUSG00000036948	Trappc14	VAT_down SAT_up (Quadrant 4)
ENSMUSG00000036986	Pml	VAT_down SAT_up (Quadrant 4)
ENSMUSG00000037138	Aff3	VAT_down SAT_up (Quadrant 4)
ENSMUSG00000037321	Tap1	VAT_down SAT_up (Quadrant 4)
ENSMUSG00000037649	H2-DMa	VAT_down SAT_up (Quadrant 4)
ENSMUSG00000037731	Themis2	VAT_down SAT_up (Quadrant 4)
ENSMUSG00000037849	Ifi206	VAT_down SAT_up (Quadrant 4)
ENSMUSG00000037902	Sirpa	VAT_down SAT_up (Quadrant 4)
ENSMUSG00000038179	Slamf7	VAT_down SAT_up (Quadrant 4)
ENSMUSG00000038642	Ctss	VAT_down SAT_up (Quadrant 4)
ENSMUSG00000039997	Ifi203	VAT_down SAT_up (Quadrant 4)
ENSMUSG00000040710	St8sia4	VAT_down SAT_up (Quadrant 4)
ENSMUSG00000040829	Zmynd15	VAT_down SAT_up (Quadrant 4)
ENSMUSG00000041202	Pla2g2d	VAT_down SAT_up (Quadrant 4)
ENSMUSG00000041859	Mcm3	VAT_down SAT_up (Quadrant 4)
ENSMUSG00000042842	Serpinb6b	VAT_down SAT_up (Quadrant 4)
ENSMUSG00000043263	Ifi209	VAT_down SAT_up (Quadrant 4)
ENSMUSG00000044734	Serpinb1a	VAT_down SAT_up (Quadrant 4)
ENSMUSG00000045328	Cenpe	VAT_down SAT_up (Quadrant 4)
ENSMUSG00000045827	Serpinb9	VAT_down SAT_up (Quadrant 4)
ENSMUSG00000046805	Mpeg1	VAT_down SAT_up (Quadrant 4)
ENSMUSG00000047180	Neurl3	VAT_down SAT_up (Quadrant 4)
ENSMUSG00000047735	Samd9l	VAT_down SAT_up (Quadrant 4)
ENSMUSG00000047945	Marcksl1	VAT_down SAT_up (Quadrant 4)
ENSMUSG00000049103	Ccr2	VAT_down SAT_up (Quadrant 4)
ENSMUSG00000049775	Tmsb4x	VAT_down SAT_up (Quadrant 4)
ENSMUSG00000052160	Pld4	VAT_down SAT_up (Quadrant 4)
ENSMUSG00000053063	Clec12a	VAT_down SAT_up (Quadrant 4)
ENSMUSG00000056290	Ms4a4b	VAT_down SAT_up (Quadrant 4)
ENSMUSG00000056917	Sipa1	VAT_down SAT_up (Quadrant 4)
ENSMUSG00000058715	Fcer1g	VAT_down SAT_up (Quadrant 4)
ENSMUSG00000060586	H2-Eb1	VAT_down SAT_up (Quadrant 4)
ENSMUSG00000061288	Taok3	VAT_down SAT_up (Quadrant 4)
ENSMUSG00000063286	Gvin-ps7	VAT_down SAT_up (Quadrant 4)
ENSMUSG00000068227	Il2rb	VAT_down SAT_up (Quadrant 4)
ENSMUSG00000069516	Lyz2	VAT_down SAT_up (Quadrant 4)
ENSMUSG00000070034	Sp110	VAT_down SAT_up (Quadrant 4)
ENSMUSG00000072620	Slfn2	VAT_down SAT_up (Quadrant 4)
ENSMUSG00000073421	H2-Ab1	VAT_down SAT_up (Quadrant 4)
ENSMUSG00000073491	Ifi213	VAT_down SAT_up (Quadrant 4)
ENSMUSG00000074151	Nlrc5	VAT_down SAT_up (Quadrant 4)
ENSMUSG00000074785	Plxnc1	VAT_down SAT_up (Quadrant 4)
ENSMUSG00000078763	Slfn1	VAT_down SAT_up (Quadrant 4)
ENSMUSG00000079227	Ccr5	VAT_down SAT_up (Quadrant 4)
ENSMUSG00000079293	Clec7a	VAT_down SAT_up (Quadrant 4)
ENSMUSG00000079547	H2-DMb1	VAT_down SAT_up (Quadrant 4)
ENSMUSG00000090164	BC035044	VAT_down SAT_up (Quadrant 4)
ENSMUSG00000090272	Mndal	VAT_down SAT_up (Quadrant 4)
ENSMUSG00000091345	Col6a5	VAT_down SAT_up (Quadrant 4)
ENSMUSG00000091649	Phf11b	VAT_down SAT_up (Quadrant 4)
ENSMUSG00000094796	BC147527	VAT_down SAT_up (Quadrant 4)
ENSMUSG00000106734	Gm20559	VAT_down SAT_up (Quadrant 4)

## Sheet: CV vs CS & OV vs OS common DEGs
gene_id	gene_name	type	Corresponding to figure 6A
ENSMUSG00000055972	2810407A14Rik	Common up (Quadrant 1)
ENSMUSG00000085139	A730046J19Rik	Common up (Quadrant 1)
ENSMUSG00000068522	Aard	Common up (Quadrant 1)
ENSMUSG00000057880	Abat	Common up (Quadrant 1)
ENSMUSG00000015243	Abca1	Common up (Quadrant 1)
ENSMUSG00000028125	Abca4	Common up (Quadrant 1)
ENSMUSG00000010651	Acaa1b	Common up (Quadrant 1)
ENSMUSG00000030861	Acadsb	Common up (Quadrant 1)
ENSMUSG00000044337	Ackr3	Common up (Quadrant 1)
ENSMUSG00000030935	Acsm3	Common up (Quadrant 1)
ENSMUSG00000059430	Actg2	Common up (Quadrant 1)
ENSMUSG00000049538	Adamts16	Common up (Quadrant 1)
ENSMUSG00000070469	Adamtsl3	Common up (Quadrant 1)
ENSMUSG00000044017	Adgrd1	Common up (Quadrant 1)
ENSMUSG00000002885	Adgre5	Common up (Quadrant 1)
ENSMUSG00000025911	Adhfe1	Common up (Quadrant 1)
ENSMUSG00000022878	Adipoq	Common up (Quadrant 1)
ENSMUSG00000031980	Agt	Common up (Quadrant 1)
ENSMUSG00000027597	Ahcy	Common up (Quadrant 1)
ENSMUSG00000021213	Akr1c13	Common up (Quadrant 1)
ENSMUSG00000053279	Aldh1a1	Common up (Quadrant 1)
ENSMUSG00000013584	Aldh1a2	Common up (Quadrant 1)
ENSMUSG00000024747	Aldh1a7	Common up (Quadrant 1)
ENSMUSG00000075296	Aldh3b2	Common up (Quadrant 1)
ENSMUSG00000018924	Alox15	Common up (Quadrant 1)
ENSMUSG00000013076	Amotl1	Common up (Quadrant 1)
ENSMUSG00000032531	Amotl2	Common up (Quadrant 1)
ENSMUSG00000074771	Ankef1	Common up (Quadrant 1)
ENSMUSG00000046532	Ar	Common up (Quadrant 1)
ENSMUSG00000020704	Asic2	Common up (Quadrant 1)
ENSMUSG00000025324	Atp10a	Common up (Quadrant 1)
ENSMUSG00000026463	Atp2b4	Common up (Quadrant 1)
ENSMUSG00000039347	Atp6v0e2	Common up (Quadrant 1)
ENSMUSG00000000142	Axin2	Common up (Quadrant 1)
ENSMUSG00000034780	B3galt1	Common up (Quadrant 1)
ENSMUSG00000027792	Bche	Common up (Quadrant 1)
ENSMUSG00000041609	Bicdl1	Common up (Quadrant 1)
ENSMUSG00000025105	Bnc1	Common up (Quadrant 1)
ENSMUSG00000028487	Bnc2	Common up (Quadrant 1)
ENSMUSG00000026278	Bok	Common up (Quadrant 1)
ENSMUSG00000058914	C1qtnf3	Common up (Quadrant 1)
ENSMUSG00000024371	C2	Common up (Quadrant 1)
ENSMUSG00000022181	C6	Common up (Quadrant 1)
ENSMUSG00000028300	C9orf72	Common up (Quadrant 1)
ENSMUSG00000028532	Cachd1	Common up (Quadrant 1)
ENSMUSG00000057914	Cacnb2	Common up (Quadrant 1)
ENSMUSG00000029761	Cald1	Common up (Quadrant 1)
ENSMUSG00000031373	Car5b	Common up (Quadrant 1)
ENSMUSG00000007655	Cav1	Common up (Quadrant 1)
ENSMUSG00000037060	Cavin3	Common up (Quadrant 1)
ENSMUSG00000022665	Ccdc80	Common up (Quadrant 1)
ENSMUSG00000037362	Ccn3	Common up (Quadrant 1)
ENSMUSG00000000184	Ccnd2	Common up (Quadrant 1)
ENSMUSG00000002308	Cd320	Common up (Quadrant 1)
ENSMUSG00000026399	Cd55	Common up (Quadrant 1)
ENSMUSG00000073802	Cdkn2b	Common up (Quadrant 1)
ENSMUSG00000033022	Cdo1	Common up (Quadrant 1)
ENSMUSG00000030878	Cdr2	Common up (Quadrant 1)
ENSMUSG00000026365	Cfh	Common up (Quadrant 1)
ENSMUSG00000031283	Chrdl1	Common up (Quadrant 1)
ENSMUSG00000030278	Cidec	Common up (Quadrant 1)
ENSMUSG00000001739	Cldn15	Common up (Quadrant 1)
ENSMUSG00000042190	Cmklr1	Common up (Quadrant 1)
ENSMUSG00000055022	Cntn1	Common up (Quadrant 1)
ENSMUSG00000028339	Col15a1	Common up (Quadrant 1)
ENSMUSG00000091345	Col6a5	Common up (Quadrant 1)
ENSMUSG00000043719	Col6a6	Common up (Quadrant 1)
ENSMUSG00000036103	Colec12	Common up (Quadrant 1)
ENSMUSG00000039782	Cpeb2	Common up (Quadrant 1)
ENSMUSG00000036596	Cpz	Common up (Quadrant 1)
ENSMUSG00000087382	Ctcflos	Common up (Quadrant 1)
ENSMUSG00000028179	Cth	Common up (Quadrant 1)
ENSMUSG00000023078	Cxcl13	Common up (Quadrant 1)
ENSMUSG00000027015	Cybrd1	Common up (Quadrant 1)
ENSMUSG00000025479	Cyp2e1	Common up (Quadrant 1)
ENSMUSG00000040703	Cyp2s1	Common up (Quadrant 1)
ENSMUSG00000030986	Dhx32	Common up (Quadrant 1)
ENSMUSG00000030409	Dmpk	Common up (Quadrant 1)
ENSMUSG00000028108	Ecm1	Common up (Quadrant 1)
ENSMUSG00000036611	Eepd1	Common up (Quadrant 1)
ENSMUSG00000020467	Efemp1	Common up (Quadrant 1)
ENSMUSG00000024772	Ehd1	Common up (Quadrant 1)
ENSMUSG00000040212	Emp3	Common up (Quadrant 1)
ENSMUSG00000028024	Enpep	Common up (Quadrant 1)
ENSMUSG00000019978	Epb41l2	Common up (Quadrant 1)
ENSMUSG00000046324	Ermp1	Common up (Quadrant 1)
ENSMUSG00000100658	F730311O21Rik	Common up (Quadrant 1)
ENSMUSG00000036136	Fam110c	Common up (Quadrant 1)
ENSMUSG00000028995	Fam126a	Common up (Quadrant 1)
ENSMUSG00000006369	Fbln1	Common up (Quadrant 1)
ENSMUSG00000064080	Fbln2	Common up (Quadrant 1)
ENSMUSG00000050503	Fbxl22	Common up (Quadrant 1)
ENSMUSG00000026938	Fcna	Common up (Quadrant 1)
ENSMUSG00000036585	Fgf1	Common up (Quadrant 1)
ENSMUSG00000021974	Fgf9	Common up (Quadrant 1)
ENSMUSG00000047528	Flacc1	Common up (Quadrant 1)
ENSMUSG00000041559	Fmod	Common up (Quadrant 1)
ENSMUSG00000046714	Foxc2	Common up (Quadrant 1)
ENSMUSG00000030064	Frmd4b	Common up (Quadrant 1)
ENSMUSG00000009633	G0s2	Common up (Quadrant 1)
ENSMUSG00000052957	Gas1	Common up (Quadrant 1)
ENSMUSG00000015627	Gata5	Common up (Quadrant 1)
ENSMUSG00000005836	Gata6	Common up (Quadrant 1)
ENSMUSG00000055737	Ghr	Common up (Quadrant 1)
ENSMUSG00000042357	Gjb5	Common up (Quadrant 1)
ENSMUSG00000036395	Glb1l2	Common up (Quadrant 1)
ENSMUSG00000094786	Gm14403	Common up (Quadrant 1)
ENSMUSG00000086679	Gm15551	Common up (Quadrant 1)
ENSMUSG00000111763	Gm34973	Common up (Quadrant 1)
ENSMUSG00000113909	Gm36377	Common up (Quadrant 1)
ENSMUSG00000117664	Gm36860	Common up (Quadrant 1)
ENSMUSG00000105867	Gm42517	Common up (Quadrant 1)
ENSMUSG00000107881	Gm44250	Common up (Quadrant 1)
ENSMUSG00000072624	Gm5460	Common up (Quadrant 1)
ENSMUSG00000091561	Gm6665	Common up (Quadrant 1)
ENSMUSG00000029314	Gpat3	Common up (Quadrant 1)
ENSMUSG00000031517	Gpm6a	Common up (Quadrant 1)
ENSMUSG00000022546	Gpt	Common up (Quadrant 1)
ENSMUSG00000042942	Greb1l	Common up (Quadrant 1)
ENSMUSG00000025934	Gsta3	Common up (Quadrant 1)
ENSMUSG00000058135	Gstm1	Common up (Quadrant 1)
ENSMUSG00000040562	Gstm2	Common up (Quadrant 1)
ENSMUSG00000021033	Gstz1	Common up (Quadrant 1)
ENSMUSG00000036181	H1f2	Common up (Quadrant 1)
ENSMUSG00000051627	H1f4	Common up (Quadrant 1)
ENSMUSG00000018102	H2bc4	Common up (Quadrant 1)
ENSMUSG00000047246	H2bc6	Common up (Quadrant 1)
ENSMUSG00000004698	Hdac9	Common up (Quadrant 1)
ENSMUSG00000031209	Heph	Common up (Quadrant 1)
ENSMUSG00000006611	Hfe	Common up (Quadrant 1)
ENSMUSG00000038203	Hoxa13	Common up (Quadrant 1)
ENSMUSG00000027102	Hoxd8	Common up (Quadrant 1)
ENSMUSG00000031722	Hp	Common up (Quadrant 1)
ENSMUSG00000021270	Hsp90aa1	Common up (Quadrant 1)
ENSMUSG00000025092	Hspa12a	Common up (Quadrant 1)
ENSMUSG00000015656	Hspa8	Common up (Quadrant 1)
ENSMUSG00000041548	Hspb8	Common up (Quadrant 1)
ENSMUSG00000081189	Hspd1-ps4	Common up (Quadrant 1)
ENSMUSG00000029657	Hsph1	Common up (Quadrant 1)
ENSMUSG00000037406	Htra4	Common up (Quadrant 1)
ENSMUSG00000023046	Igfbp6	Common up (Quadrant 1)
ENSMUSG00000076617	Ighm	Common up (Quadrant 1)
ENSMUSG00000040612	Ildr2	Common up (Quadrant 1)
ENSMUSG00000005611	Irag1	Common up (Quadrant 1)
ENSMUSG00000047182	Irs3	Common up (Quadrant 1)
ENSMUSG00000021922	Itih4	Common up (Quadrant 1)
ENSMUSG00000020737	Jpt1	Common up (Quadrant 1)
ENSMUSG00000027827	Kcnab1	Common up (Quadrant 1)
ENSMUSG00000040896	Kcnd3	Common up (Quadrant 1)
ENSMUSG00000074575	Kcng1	Common up (Quadrant 1)
ENSMUSG00000062609	Kcnj15	Common up (Quadrant 1)
ENSMUSG00000059022	Kcp	Common up (Quadrant 1)
ENSMUSG00000060459	Kng2	Common up (Quadrant 1)
ENSMUSG00000035849	Krt222	Common up (Quadrant 1)
ENSMUSG00000022257	Laptm4b	Common up (Quadrant 1)
ENSMUSG00000016024	Lbp	Common up (Quadrant 1)
ENSMUSG00000032401	Lctl	Common up (Quadrant 1)
ENSMUSG00000068220	Lgals1	Common up (Quadrant 1)
ENSMUSG00000039252	Lgi2	Common up (Quadrant 1)
ENSMUSG00000027070	Lrp2	Common up (Quadrant 1)
ENSMUSG00000029103	Lrpap1	Common up (Quadrant 1)
ENSMUSG00000043110	Lrrn4	Common up (Quadrant 1)
ENSMUSG00000018819	Lsp1	Common up (Quadrant 1)
ENSMUSG00000040488	Ltbp4	Common up (Quadrant 1)
ENSMUSG00000024481	Lvrn	Common up (Quadrant 1)
ENSMUSG00000030787	Lyve1	Common up (Quadrant 1)
ENSMUSG00000024558	Mapk4	Common up (Quadrant 1)
ENSMUSG00000042688	Mapk6	Common up (Quadrant 1)
ENSMUSG00000090667	Mdfic2	Common up (Quadrant 1)
ENSMUSG00000057751	Megf6	Common up (Quadrant 1)
ENSMUSG00000030218	Mgp	Common up (Quadrant 1)
ENSMUSG00000029575	Mmab	Common up (Quadrant 1)
ENSMUSG00000029436	Mmp17	Common up (Quadrant 1)
ENSMUSG00000029061	Mmp23	Common up (Quadrant 1)
ENSMUSG00000020682	Mmp28	Common up (Quadrant 1)
ENSMUSG00000031434	Morc4	Common up (Quadrant 1)
ENSMUSG00000028402	Mpdz	Common up (Quadrant 1)
ENSMUSG00000109564	Muc16	Common up (Quadrant 1)
ENSMUSG00000066154	Mup3	Common up (Quadrant 1)
ENSMUSG00000022836	Mylk	Common up (Quadrant 1)
ENSMUSG00000031698	Mylk3	Common up (Quadrant 1)
ENSMUSG00000036098	Myrf	Common up (Quadrant 1)
ENSMUSG00000043943	Naalad2	Common up (Quadrant 1)
ENSMUSG00000041120	Nbl1	Common up (Quadrant 1)
ENSMUSG00000024425	Ndfip1	Common up (Quadrant 1)
ENSMUSG00000021032	Ngb	Common up (Quadrant 1)
ENSMUSG00000005397	Nid1	Common up (Quadrant 1)
ENSMUSG00000021806	Nid2	Common up (Quadrant 1)
ENSMUSG00000027574	Nkain4	Common up (Quadrant 1)
ENSMUSG00000031661	Nkd1	Common up (Quadrant 1)
ENSMUSG00000039114	Nrn1	Common up (Quadrant 1)
ENSMUSG00000024109	Nrxn1	Common up (Quadrant 1)
ENSMUSG00000046178	Nxph1	Common up (Quadrant 1)
ENSMUSG00000026833	Olfm1	Common up (Quadrant 1)
ENSMUSG00000045392	Olfr1033	Common up (Quadrant 1)
ENSMUSG00000046160	Olig1	Common up (Quadrant 1)
ENSMUSG00000010311	Optc	Common up (Quadrant 1)
ENSMUSG00000028359	Orm3	Common up (Quadrant 1)
ENSMUSG00000022186	Oxct1	Common up (Quadrant 1)
ENSMUSG00000019916	P4ha1	Common up (Quadrant 1)
ENSMUSG00000031284	Pak3	Common up (Quadrant 1)
ENSMUSG00000052613	Pcdh15	Common up (Quadrant 1)
ENSMUSG00000060212	Pcnx2	Common up (Quadrant 1)
ENSMUSG00000053965	Pde5a	Common up (Quadrant 1)
ENSMUSG00000026189	Pecr	Common up (Quadrant 1)
ENSMUSG00000053398	Phgdh	Common up (Quadrant 1)
ENSMUSG00000045658	Pid1	Common up (Quadrant 1)
ENSMUSG00000038725	Pkhd1l1	Common up (Quadrant 1)
ENSMUSG00000041957	Pkp2	Common up (Quadrant 1)
ENSMUSG00000019817	Plagl1	Common up (Quadrant 1)
ENSMUSG00000021822	Plau	Common up (Quadrant 1)
ENSMUSG00000029765	Plxna4	Common up (Quadrant 1)
ENSMUSG00000041653	Pnpla3	Common up (Quadrant 1)
ENSMUSG00000029759	Pon3	Common up (Quadrant 1)
ENSMUSG00000020253	Ppm1m	Common up (Quadrant 1)
ENSMUSG00000006014	Prg4	Common up (Quadrant 1)
ENSMUSG00000079037	Prnp	Common up (Quadrant 1)
ENSMUSG00000073565	Prr16	Common up (Quadrant 1)
ENSMUSG00000033361	Prrg3	Common up (Quadrant 1)
ENSMUSG00000024640	Psat1	Common up (Quadrant 1)
ENSMUSG00000017969	Ptgis	Common up (Quadrant 1)
ENSMUSG00000059456	Ptk2b	Common up (Quadrant 1)
ENSMUSG00000034573	Ptpn13	Common up (Quadrant 1)
ENSMUSG00000035916	Ptprq	Common up (Quadrant 1)
ENSMUSG00000019832	Rab32	Common up (Quadrant 1)
ENSMUSG00000029641	Rasl11a	Common up (Quadrant 1)
ENSMUSG00000029701	Rbm28	Common up (Quadrant 1)
ENSMUSG00000024990	Rbp4	Common up (Quadrant 1)
ENSMUSG00000035504	Reep6	Common up (Quadrant 1)
ENSMUSG00000012705	Retn	Common up (Quadrant 1)
ENSMUSG00000019944	Rhobtb1	Common up (Quadrant 1)
ENSMUSG00000010086	Rnf112	Common up (Quadrant 1)
ENSMUSG00000062309	Rpp25	Common up (Quadrant 1)
ENSMUSG00000031309	Rps6ka3	Common up (Quadrant 1)
ENSMUSG00000028871	Rspo1	Common up (Quadrant 1)
ENSMUSG00000019880	Rspo3	Common up (Quadrant 1)
ENSMUSG00000046056	Sbsn	Common up (Quadrant 1)
ENSMUSG00000049281	Scn3b	Common up (Quadrant 1)
ENSMUSG00000019124	Scrn1	Common up (Quadrant 1)
ENSMUSG00000028780	Sema3c	Common up (Quadrant 1)
ENSMUSG00000022231	Sema5a	Common up (Quadrant 1)
ENSMUSG00000066364	Serpina3b	Common up (Quadrant 1)
ENSMUSG00000066361	Serpina3c	Common up (Quadrant 1)
ENSMUSG00000021091	Serpina3n	Common up (Quadrant 1)
ENSMUSG00000042842	Serpinb6b	Common up (Quadrant 1)
ENSMUSG00000023224	Serping1	Common up (Quadrant 1)
ENSMUSG00000020354	Sgcd	Common up (Quadrant 1)
ENSMUSG00000004631	Sgce	Common up (Quadrant 1)
ENSMUSG00000053930	Shisa6	Common up (Quadrant 1)
ENSMUSG00000036078	Sigmar1	Common up (Quadrant 1)
ENSMUSG00000032902	Slc16a1	Common up (Quadrant 1)
ENSMUSG00000029847	Slc23a4	Common up (Quadrant 1)
ENSMUSG00000026819	Slc25a25	Common up (Quadrant 1)
ENSMUSG00000030108	Slc6a13	Common up (Quadrant 1)
ENSMUSG00000054640	Slc8a1	Common up (Quadrant 1)
ENSMUSG00000023886	Smoc2	Common up (Quadrant 1)
ENSMUSG00000058297	Spock2	Common up (Quadrant 1)
ENSMUSG00000054162	Spock3	Common up (Quadrant 1)
ENSMUSG00000037014	Sstr4	Common up (Quadrant 1)
ENSMUSG00000025789	St8sia2	Common up (Quadrant 1)
ENSMUSG00000027762	Sucnr1	Common up (Quadrant 1)
ENSMUSG00000016918	Sulf1	Common up (Quadrant 1)
ENSMUSG00000030711	Sult1a1	Common up (Quadrant 1)
ENSMUSG00000050315	Synpo2	Common up (Quadrant 1)
ENSMUSG00000033450	Tagap	Common up (Quadrant 1)
ENSMUSG00000045680	Tcf21	Common up (Quadrant 1)
ENSMUSG00000006642	Tcf23	Common up (Quadrant 1)
ENSMUSG00000074743	Thbd	Common up (Quadrant 1)
ENSMUSG00000054675	Tmem119	Common up (Quadrant 1)
ENSMUSG00000061451	Tmem151a	Common up (Quadrant 1)
ENSMUSG00000036502	Tmem255a	Common up (Quadrant 1)
ENSMUSG00000030306	Tmtc1	Common up (Quadrant 1)
ENSMUSG00000074345	Tnfaip8l3	Common up (Quadrant 1)
ENSMUSG00000063727	Tnfrsf11b	Common up (Quadrant 1)
ENSMUSG00000021573	Tppp	Common up (Quadrant 1)
ENSMUSG00000032554	Trf	Common up (Quadrant 1)
ENSMUSG00000039826	Trub2	Common up (Quadrant 1)
ENSMUSG00000020963	Tshr	Common up (Quadrant 1)
ENSMUSG00000058254	Tspan7	Common up (Quadrant 1)
ENSMUSG00000033530	Ttc7b	Common up (Quadrant 1)
ENSMUSG00000072235	Tuba1a	Common up (Quadrant 1)
ENSMUSG00000023004	Tuba1b	Common up (Quadrant 1)
ENSMUSG00000029223	Uchl1	Common up (Quadrant 1)
ENSMUSG00000090145	Ugt1a6b	Common up (Quadrant 1)
ENSMUSG00000090124	Ugt1a7c	Common up (Quadrant 1)
ENSMUSG00000049152	Ugt3a2	Common up (Quadrant 1)
ENSMUSG00000049436	Upk1b	Common up (Quadrant 1)
ENSMUSG00000010936	Vac14	Common up (Quadrant 1)
ENSMUSG00000024076	Vit	Common up (Quadrant 1)
ENSMUSG00000020010	Vnn3	Common up (Quadrant 1)
ENSMUSG00000019831	Wasf1	Common up (Quadrant 1)
ENSMUSG00000029442	Wdr66	Common up (Quadrant 1)
ENSMUSG00000023336	Wfdc1	Common up (Quadrant 1)
ENSMUSG00000027840	Wnt2b	Common up (Quadrant 1)
ENSMUSG00000074987	Wt1os	Common up (Quadrant 1)
ENSMUSG00000031351	Zfp185	Common up (Quadrant 1)
ENSMUSG00000078866	Zfp970	Common up (Quadrant 1)
ENSMUSG00000022306	Zfpm2	Common up (Quadrant 1)
ENSMUSG00000048040	Arxes2	CV_up OV_down (Quadrant 2)
ENSMUSG00000040283	Btnl9	CV_up OV_down (Quadrant 2)
ENSMUSG00000067235	H2-Q10	CV_up OV_down (Quadrant 2)
ENSMUSG00000054203	Ifi205	CV_up OV_down (Quadrant 2)
ENSMUSG00000083411	Rpl30-ps10	CV_up OV_down (Quadrant 2)
ENSMUSG00000031808	Slc27a1	CV_up OV_down (Quadrant 2)
ENSMUSG00000029093	Sorcs2	CV_up OV_down (Quadrant 2)
ENSMUSG00000022747	St3gal6	CV_up OV_down (Quadrant 2)
ENSMUSG00000060512	0610040J01Rik	Common down (Quadrant 3)
ENSMUSG00000028536	2610528J11Rik	Common down (Quadrant 3)
ENSMUSG00000117042	2700054A10Rik	Common down (Quadrant 3)
ENSMUSG00000085421	4732490B19Rik	Common down (Quadrant 3)
ENSMUSG00000085589	A430078I02Rik	Common down (Quadrant 3)
ENSMUSG00000018800	Abca5	Common down (Quadrant 3)
ENSMUSG00000040136	Abcc8	Common down (Quadrant 3)
ENSMUSG00000072949	Acot1	Common down (Quadrant 3)
ENSMUSG00000032281	Acsbg1	Common down (Quadrant 3)
ENSMUSG00000055301	Adh7	Common down (Quadrant 3)
ENSMUSG00000033717	Adra2a	Common down (Quadrant 3)
ENSMUSG00000035283	Adrb1	Common down (Quadrant 3)
ENSMUSG00000042410	Agps	Common down (Quadrant 3)
ENSMUSG00000049115	Agtr1a	Common down (Quadrant 3)
ENSMUSG00000093738	AI606473	Common down (Quadrant 3)
ENSMUSG00000034382	AI661453	Common down (Quadrant 3)
ENSMUSG00000001864	Aif1l	Common down (Quadrant 3)
ENSMUSG00000021214	Akr1c18	Common down (Quadrant 3)
ENSMUSG00000015134	Aldh1a3	Common down (Quadrant 3)
ENSMUSG00000017390	Aldoc	Common down (Quadrant 3)
ENSMUSG00000028766	Alpl	Common down (Quadrant 3)
ENSMUSG00000040310	Alx4	Common down (Quadrant 3)
ENSMUSG00000069601	Ank3	Common down (Quadrant 3)
ENSMUSG00000031075	Ano1	Common down (Quadrant 3)
ENSMUSG00000054662	Ano9	Common down (Quadrant 3)
ENSMUSG00000039062	Anpep	Common down (Quadrant 3)
ENSMUSG00000003309	Ap1m2	Common down (Quadrant 3)
ENSMUSG00000009585	Apobec3	Common down (Quadrant 3)
ENSMUSG00000022548	Apod	Common down (Quadrant 3)
ENSMUSG00000047631	Apof	Common down (Quadrant 3)
ENSMUSG00000044217	Aqp5	Common down (Quadrant 3)
ENSMUSG00000019852	Arfgef3	Common down (Quadrant 3)
ENSMUSG00000019987	Arg1	Common down (Quadrant 3)
ENSMUSG00000021125	Arg2	Common down (Quadrant 3)
ENSMUSG00000074625	Arhgap40	Common down (Quadrant 3)
ENSMUSG00000050730	Arhgap42	Common down (Quadrant 3)
ENSMUSG00000040964	Arhgef10l	Common down (Quadrant 3)
ENSMUSG00000029032	Arhgef16	Common down (Quadrant 3)
ENSMUSG00000028919	Arhgef19	Common down (Quadrant 3)
ENSMUSG00000040969	Arhgef38	Common down (Quadrant 3)
ENSMUSG00000049866	Arl4c	Common down (Quadrant 3)
ENSMUSG00000049804	Armcx4	Common down (Quadrant 3)
ENSMUSG00000026972	Arrdc1	Common down (Quadrant 3)
ENSMUSG00000055415	Atp10b	Common down (Quadrant 3)
ENSMUSG00000034112	Atp2c2	Common down (Quadrant 3)
ENSMUSG00000006269	Atp6v1b1	Common down (Quadrant 3)
ENSMUSG00000118642	AY036118	Common down (Quadrant 3)
ENSMUSG00000006731	B4galnt1	Common down (Quadrant 3)
ENSMUSG00000032033	Barx2	Common down (Quadrant 3)
ENSMUSG00000041660	Bbox1	Common down (Quadrant 3)
ENSMUSG00000041674	BC006965	Common down (Quadrant 3)
ENSMUSG00000046317	BC107364	Common down (Quadrant 3)
ENSMUSG00000030200	Bcl2l14	Common down (Quadrant 3)
ENSMUSG00000074489	Bglap3	Common down (Quadrant 3)
ENSMUSG00000030256	Bhlhe41	Common down (Quadrant 3)
ENSMUSG00000043782	Bicdl2	Common down (Quadrant 3)
ENSMUSG00000028392	Bspry	Common down (Quadrant 3)
ENSMUSG00000020042	Btbd11	Common down (Quadrant 3)
ENSMUSG00000000706	Btn1a1	Common down (Quadrant 3)
ENSMUSG00000053216	Btn2a2	Common down (Quadrant 3)
ENSMUSG00000052951	C130021I20Rik	Common down (Quadrant 3)
ENSMUSG00000100444	C530043A13Rik	Common down (Quadrant 3)
ENSMUSG00000050390	C77080	Common down (Quadrant 3)
ENSMUSG00000054793	Cadm4	Common down (Quadrant 3)
ENSMUSG00000038599	Capn8	Common down (Quadrant 3)
ENSMUSG00000039676	Capsl	Common down (Quadrant 3)
ENSMUSG00000041261	Car8	Common down (Quadrant 3)
ENSMUSG00000028977	Casz1	Common down (Quadrant 3)
ENSMUSG00000035640	Cbarp	Common down (Quadrant 3)
ENSMUSG00000040525	Cblc	Common down (Quadrant 3)
ENSMUSG00000053411	Cbx7	Common down (Quadrant 3)
ENSMUSG00000031150	Ccdc120	Common down (Quadrant 3)
ENSMUSG00000075225	Ccdc162	Common down (Quadrant 3)
ENSMUSG00000037979	Ccdc92	Common down (Quadrant 3)
ENSMUSG00000032532	Cck	Common down (Quadrant 3)
ENSMUSG00000094686	Ccl21a	Common down (Quadrant 3)
ENSMUSG00000019997	Ccn2	Common down (Quadrant 3)
ENSMUSG00000070348	Ccnd1	Common down (Quadrant 3)
ENSMUSG00000051439	Cd14	Common down (Quadrant 3)
ENSMUSG00000019818	Cd164	Common down (Quadrant 3)
ENSMUSG00000047139	Cd24a	Common down (Quadrant 3)
ENSMUSG00000030342	Cd9	Common down (Quadrant 3)
ENSMUSG00000033502	Cdc14a	Common down (Quadrant 3)
ENSMUSG00000021175	Cdca7l	Common down (Quadrant 3)
ENSMUSG00000035498	Cdcp1	Common down (Quadrant 3)
ENSMUSG00000000303	Cdh1	Common down (Quadrant 3)
ENSMUSG00000021803	Cdhr1	Common down (Quadrant 3)
ENSMUSG00000026437	Cdk18	Common down (Quadrant 3)
ENSMUSG00000038481	Cdk19	Common down (Quadrant 3)
ENSMUSG00000071637	Cebpd	Common down (Quadrant 3)
ENSMUSG00000016028	Celsr1	Common down (Quadrant 3)
ENSMUSG00000068740	Celsr2	Common down (Quadrant 3)
ENSMUSG00000024754	Cemip2	Common down (Quadrant 3)
ENSMUSG00000072825	Cep170b	Common down (Quadrant 3)
ENSMUSG00000015970	Chdh	Common down (Quadrant 3)
ENSMUSG00000064246	Chil1	Common down (Quadrant 3)
ENSMUSG00000027536	Chmp4c	Common down (Quadrant 3)
ENSMUSG00000032773	Chrm1	Common down (Quadrant 3)
ENSMUSG00000045193	Cirbp	Common down (Quadrant 3)
ENSMUSG00000032578	Cish	Common down (Quadrant 3)
ENSMUSG00000051159	Cited1	Common down (Quadrant 3)
ENSMUSG00000070803	Cited4	Common down (Quadrant 3)
ENSMUSG00000000308	Ckmt1	Common down (Quadrant 3)
ENSMUSG00000028255	Clca1	Common down (Quadrant 3)
ENSMUSG00000056025	Clca3a1	Common down (Quadrant 3)
ENSMUSG00000028262	Clca3a2	Common down (Quadrant 3)
ENSMUSG00000070473	Cldn3	Common down (Quadrant 3)
ENSMUSG00000047501	Cldn4	Common down (Quadrant 3)
ENSMUSG00000018569	Cldn7	Common down (Quadrant 3)
ENSMUSG00000050520	Cldn8	Common down (Quadrant 3)
ENSMUSG00000022949	Clic6	Common down (Quadrant 3)
ENSMUSG00000024059	Clip4	Common down (Quadrant 3)
ENSMUSG00000022225	Cma1	Common down (Quadrant 3)
ENSMUSG00000028841	Cnksr1	Common down (Quadrant 3)
ENSMUSG00000028444	Cntfr	Common down (Quadrant 3)
ENSMUSG00000027966	Col11a1	Common down (Quadrant 3)
ENSMUSG00000025064	Col17a1	Common down (Quadrant 3)
ENSMUSG00000045672	Col27a1	Common down (Quadrant 3)
ENSMUSG00000031273	Col4a6	Common down (Quadrant 3)
ENSMUSG00000025650	Col7a1	Common down (Quadrant 3)
ENSMUSG00000068196	Col8a1	Common down (Quadrant 3)
ENSMUSG00000028626	Col9a2	Common down (Quadrant 3)
ENSMUSG00000027570	Col9a3	Common down (Quadrant 3)
ENSMUSG00000028337	Coro2a	Common down (Quadrant 3)
ENSMUSG00000001865	Cpa3	Common down (Quadrant 3)
ENSMUSG00000018727	Cpsf4l	Common down (Quadrant 3)
ENSMUSG00000032291	Crabp1	Common down (Quadrant 3)
ENSMUSG00000031736	Crnde	Common down (Quadrant 3)
ENSMUSG00000084989	Crocc2	Common down (Quadrant 3)
ENSMUSG00000019866	Crybg1	Common down (Quadrant 3)
ENSMUSG00000071714	Csf2rb2	Common down (Quadrant 3)
ENSMUSG00000001622	Csn3	Common down (Quadrant 3)
ENSMUSG00000004552	Ctse	Common down (Quadrant 3)
ENSMUSG00000031778	Cx3cl1	Common down (Quadrant 3)
ENSMUSG00000021508	Cxcl14	Common down (Quadrant 3)
ENSMUSG00000029375	Cxcl15	Common down (Quadrant 3)
ENSMUSG00000060188	Cxcl17	Common down (Quadrant 3)
ENSMUSG00000019590	Cyb561	Common down (Quadrant 3)
ENSMUSG00000032323	Cyp11a1	Common down (Quadrant 3)
ENSMUSG00000070419	Cyp3a57	Common down (Quadrant 3)
ENSMUSG00000036731	Cysrt1	Common down (Quadrant 3)
ENSMUSG00000026832	Cytip	Common down (Quadrant 3)
ENSMUSG00000115902	D730005E14Rik	Common down (Quadrant 3)
ENSMUSG00000030994	D7Ertd443e	Common down (Quadrant 3)
ENSMUSG00000028159	Dapp1	Common down (Quadrant 3)
ENSMUSG00000027797	Dclk1	Common down (Quadrant 3)
ENSMUSG00000038665	Dgki	Common down (Quadrant 3)
ENSMUSG00000030792	Dkkl1	Common down (Quadrant 3)
ENSMUSG00000047517	Dmbt1	Common down (Quadrant 3)
ENSMUSG00000018581	Dnah11	Common down (Quadrant 3)
ENSMUSG00000061322	Dnai1	Common down (Quadrant 3)
ENSMUSG00000036764	Dnajc12	Common down (Quadrant 3)
ENSMUSG00000000223	Drp2	Common down (Quadrant 3)
ENSMUSG00000024331	Dsc2	Common down (Quadrant 3)
ENSMUSG00000059898	Dsc3	Common down (Quadrant 3)
ENSMUSG00000044393	Dsg2	Common down (Quadrant 3)
ENSMUSG00000054889	Dsp	Common down (Quadrant 3)
ENSMUSG00000012350	Ehf	Common down (Quadrant 3)
ENSMUSG00000040412	Elapor1	Common down (Quadrant 3)
ENSMUSG00000003051	Elf3	Common down (Quadrant 3)
ENSMUSG00000027186	Elf5	Common down (Quadrant 3)
ENSMUSG00000021696	Elovl7	Common down (Quadrant 3)
ENSMUSG00000028445	Enho	Common down (Quadrant 3)
ENSMUSG00000037370	Enpp1	Common down (Quadrant 3)
ENSMUSG00000041608	Entpd3	Common down (Quadrant 3)
ENSMUSG00000028434	Epb41l4b	Common down (Quadrant 3)
ENSMUSG00000045394	Epcam	Common down (Quadrant 3)
ENSMUSG00000052504	Epha3	Common down (Quadrant 3)
ENSMUSG00000028289	Epha7	Common down (Quadrant 3)
ENSMUSG00000005958	Ephb3	Common down (Quadrant 3)
ENSMUSG00000010080	Epn3	Common down (Quadrant 3)
ENSMUSG00000062312	Erbb2	Common down (Quadrant 3)
ENSMUSG00000018166	Erbb3	Common down (Quadrant 3)
ENSMUSG00000062209	Erbb4	Common down (Quadrant 3)
ENSMUSG00000040728	Esrp1	Common down (Quadrant 3)
ENSMUSG00000084128	Esrp2	Common down (Quadrant 3)
ENSMUSG00000037681	Esyt3	Common down (Quadrant 3)
ENSMUSG00000011263	Exoc3l2	Common down (Quadrant 3)
ENSMUSG00000034584	Exph5	Common down (Quadrant 3)
ENSMUSG00000017897	Eya2	Common down (Quadrant 3)
ENSMUSG00000078670	Fam174b	Common down (Quadrant 3)
ENSMUSG00000027495	Fam210b	Common down (Quadrant 3)
ENSMUSG00000043681	Fam25c	Common down (Quadrant 3)
ENSMUSG00000032358	Fam83b	Common down (Quadrant 3)
ENSMUSG00000046761	Fam83h	Common down (Quadrant 3)
ENSMUSG00000055333	Fat2	Common down (Quadrant 3)
ENSMUSG00000027386	Fbln7	Common down (Quadrant 3)
ENSMUSG00000047730	Fcgbp	Common down (Quadrant 3)
ENSMUSG00000013338	Fer1l4	Common down (Quadrant 3)
ENSMUSG00000027356	Fermt1	Common down (Quadrant 3)
ENSMUSG00000033831	Fgb	Common down (Quadrant 3)
ENSMUSG00000030849	Fgfr2	Common down (Quadrant 3)
ENSMUSG00000033860	Fgg	Common down (Quadrant 3)
ENSMUSG00000041842	Fhdc1	Common down (Quadrant 3)
ENSMUSG00000034295	Fhod3	Common down (Quadrant 3)
ENSMUSG00000021250	Fos	Common down (Quadrant 3)
ENSMUSG00000035451	Foxa1	Common down (Quadrant 3)
ENSMUSG00000047861	Foxi1	Common down (Quadrant 3)
ENSMUSG00000034227	Foxj1	Common down (Quadrant 3)
ENSMUSG00000059049	Frem1	Common down (Quadrant 3)
ENSMUSG00000019779	Frk	Common down (Quadrant 3)
ENSMUSG00000049176	Frmpd4	Common down (Quadrant 3)
ENSMUSG00000055373	Fut9	Common down (Quadrant 3)
ENSMUSG00000059412	Fxyd2	Common down (Quadrant 3)
ENSMUSG00000057092	Fxyd3	Common down (Quadrant 3)
ENSMUSG00000066705	Fxyd6	Common down (Quadrant 3)
ENSMUSG00000041075	Fzd7	Common down (Quadrant 3)
ENSMUSG00000020159	Gabrp	Common down (Quadrant 3)
ENSMUSG00000015312	Gadd45b	Common down (Quadrant 3)
ENSMUSG00000026994	Galnt3	Common down (Quadrant 3)
ENSMUSG00000015619	Gata3	Common down (Quadrant 3)
ENSMUSG00000032350	Gclc	Common down (Quadrant 3)
ENSMUSG00000006345	Ggt1	Common down (Quadrant 3)
ENSMUSG00000039131	Gipc2	Common down (Quadrant 3)
ENSMUSG00000046352	Gjb2	Common down (Quadrant 3)
ENSMUSG00000024827	Gldc	Common down (Quadrant 3)
ENSMUSG00000028020	Glrb	Common down (Quadrant 3)
ENSMUSG00000049971	Glt1d1	Common down (Quadrant 3)
ENSMUSG00000087265	Gm12349	Common down (Quadrant 3)
ENSMUSG00000086549	Gm13648	Common down (Quadrant 3)
ENSMUSG00000081343	Gm16071	Common down (Quadrant 3)
ENSMUSG00000089804	Gm16136	Common down (Quadrant 3)
ENSMUSG00000078117	Gm16485	Common down (Quadrant 3)
ENSMUSG00000104841	Gm17743	Common down (Quadrant 3)
ENSMUSG00000093587	Gm20554	Common down (Quadrant 3)
ENSMUSG00000010529	Gm266	Common down (Quadrant 3)
ENSMUSG00000117980	Gm30571	Common down (Quadrant 3)
ENSMUSG00000110462	Gm35572	Common down (Quadrant 3)
ENSMUSG00000106957	Gm43085	Common down (Quadrant 3)
ENSMUSG00000106641	Gm43534	Common down (Quadrant 3)
ENSMUSG00000118086	Gm52981	Common down (Quadrant 3)
ENSMUSG00000112292	Gm8275	Common down (Quadrant 3)
ENSMUSG00000024697	Gna14	Common down (Quadrant 3)
ENSMUSG00000058571	Gpc6	Common down (Quadrant 3)
ENSMUSG00000029816	Gpnmb	Common down (Quadrant 3)
ENSMUSG00000049092	Gpr137c	Common down (Quadrant 3)
ENSMUSG00000019312	Grb7	Common down (Quadrant 3)
ENSMUSG00000020656	Grhl1	Common down (Quadrant 3)
ENSMUSG00000022286	Grhl2	Common down (Quadrant 3)
ENSMUSG00000001985	Grik3	Common down (Quadrant 3)
ENSMUSG00000034813	Grip1	Common down (Quadrant 3)
ENSMUSG00000021095	Gsc	Common down (Quadrant 3)
ENSMUSG00000000031	H19	Common down (Quadrant 3)
ENSMUSG00000016283	H2-M2	Common down (Quadrant 3)
ENSMUSG00000091705	H2-Q2	Common down (Quadrant 3)
ENSMUSG00000016559	H3f3b	Common down (Quadrant 3)
ENSMUSG00000006930	Hap1	Common down (Quadrant 3)
ENSMUSG00000030606	Hapln3	Common down (Quadrant 3)
ENSMUSG00000026874	Hc	Common down (Quadrant 3)
ENSMUSG00000034245	Hdac11	Common down (Quadrant 3)
ENSMUSG00000022528	Hes1	Common down (Quadrant 3)
ENSMUSG00000040289	Hey1	Common down (Quadrant 3)
ENSMUSG00000053461	Hhipl2	Common down (Quadrant 3)
ENSMUSG00000007908	Hmgcll1	Common down (Quadrant 3)
ENSMUSG00000025813	Homer2	Common down (Quadrant 3)
ENSMUSG00000028572	Hook1	Common down (Quadrant 3)
ENSMUSG00000052566	Hook2	Common down (Quadrant 3)
ENSMUSG00000001249	Hpn	Common down (Quadrant 3)
ENSMUSG00000062184	Hs6st2	Common down (Quadrant 3)
ENSMUSG00000016194	Hsd11b1	Common down (Quadrant 3)
ENSMUSG00000031551	Ido1	Common down (Quadrant 3)
ENSMUSG00000062157	Ifnlr1	Common down (Quadrant 3)
ENSMUSG00000026185	Igfbp5	Common down (Quadrant 3)
ENSMUSG00000037995	Igsf9	Common down (Quadrant 3)
ENSMUSG00000017057	Il13ra1	Common down (Quadrant 3)
ENSMUSG00000024578	Il17b	Common down (Quadrant 3)
ENSMUSG00000026070	Il18r1	Common down (Quadrant 3)
ENSMUSG00000026073	Il1r2	Common down (Quadrant 3)
ENSMUSG00000070942	Il1rl2	Common down (Quadrant 3)
ENSMUSG00000022900	Ildr1	Common down (Quadrant 3)
ENSMUSG00000041605	Inava	Common down (Quadrant 3)
ENSMUSG00000037035	Inhbb	Common down (Quadrant 3)
ENSMUSG00000003477	Inmt	Common down (Quadrant 3)
ENSMUSG00000026638	Irf6	Common down (Quadrant 3)
ENSMUSG00000060969	Irx1	Common down (Quadrant 3)
ENSMUSG00000001504	Irx2	Common down (Quadrant 3)
ENSMUSG00000031734	Irx3	Common down (Quadrant 3)
ENSMUSG00000046413	Irx3os	Common down (Quadrant 3)
ENSMUSG00000021604	Irx4	Common down (Quadrant 3)
ENSMUSG00000031737	Irx5	Common down (Quadrant 3)
ENSMUSG00000074766	Ism1	Common down (Quadrant 3)
ENSMUSG00000026768	Itga8	Common down (Quadrant 3)
ENSMUSG00000020758	Itgb4	Common down (Quadrant 3)
ENSMUSG00000026971	Itgb6	Common down (Quadrant 3)
ENSMUSG00000025321	Itgb8	Common down (Quadrant 3)
ENSMUSG00000032925	Itgbl1	Common down (Quadrant 3)
ENSMUSG00000037254	Itih2	Common down (Quadrant 3)
ENSMUSG00000031239	Itm2a	Common down (Quadrant 3)
ENSMUSG00000037973	Itprid1	Common down (Quadrant 3)
ENSMUSG00000052837	Junb	Common down (Quadrant 3)
ENSMUSG00000087366	Junos	Common down (Quadrant 3)
ENSMUSG00000035407	Kank4	Common down (Quadrant 3)
ENSMUSG00000058248	Kcnh1	Common down (Quadrant 3)
ENSMUSG00000096146	Kcnj11	Common down (Quadrant 3)
ENSMUSG00000041695	Kcnj2	Common down (Quadrant 3)
ENSMUSG00000033998	Kcnk1	Common down (Quadrant 3)
ENSMUSG00000023243	Kcnk5	Common down (Quadrant 3)
ENSMUSG00000036225	Kctd1	Common down (Quadrant 3)
ENSMUSG00000046523	Kctd4	Common down (Quadrant 3)
ENSMUSG00000037600	Kdf1	Common down (Quadrant 3)
ENSMUSG00000026764	Kif5c	Common down (Quadrant 3)
ENSMUSG00000005672	Kit	Common down (Quadrant 3)
ENSMUSG00000040714	Klc3	Common down (Quadrant 3)
ENSMUSG00000005148	Klf5	Common down (Quadrant 3)
ENSMUSG00000067616	Klk11	Common down (Quadrant 3)
ENSMUSG00000045545	Krt14	Common down (Quadrant 3)
ENSMUSG00000054146	Krt15	Common down (Quadrant 3)
ENSMUSG00000035557	Krt17	Common down (Quadrant 3)
ENSMUSG00000023043	Krt18	Common down (Quadrant 3)
ENSMUSG00000020911	Krt19	Common down (Quadrant 3)
ENSMUSG00000061527	Krt5	Common down (Quadrant 3)
ENSMUSG00000023039	Krt7	Common down (Quadrant 3)
ENSMUSG00000049382	Krt8	Common down (Quadrant 3)
ENSMUSG00000047641	Krt87	Common down (Quadrant 3)
ENSMUSG00000021843	Ktn1	Common down (Quadrant 3)
ENSMUSG00000041782	Lad1	Common down (Quadrant 3)
ENSMUSG00000032796	Lama1	Common down (Quadrant 3)
ENSMUSG00000024421	Lama3	Common down (Quadrant 3)
ENSMUSG00000026639	Lamb3	Common down (Quadrant 3)
ENSMUSG00000026479	Lamc2	Common down (Quadrant 3)
ENSMUSG00000026840	Lamc3	Common down (Quadrant 3)
ENSMUSG00000040434	Large2	Common down (Quadrant 3)
ENSMUSG00000026822	Lcn2	Common down (Quadrant 3)
ENSMUSG00000020140	Lgr5	Common down (Quadrant 3)
ENSMUSG00000042793	Lgr6	Common down (Quadrant 3)
ENSMUSG00000096225	Lhx8	Common down (Quadrant 3)
ENSMUSG00000044626	Liph	Common down (Quadrant 3)
ENSMUSG00000038765	Lmx1b	Common down (Quadrant 3)
ENSMUSG00000020607	Lratd1	Common down (Quadrant 3)
ENSMUSG00000026961	Lrrc26	Common down (Quadrant 3)
ENSMUSG00000046807	Lrrc75b	Common down (Quadrant 3)
ENSMUSG00000046589	Lrrc8e	Common down (Quadrant 3)
ENSMUSG00000061080	Lsamp	Common down (Quadrant 3)
ENSMUSG00000002020	Ltbp2	Common down (Quadrant 3)
ENSMUSG00000032496	Ltf	Common down (Quadrant 3)
ENSMUSG00000034634	Ly6d	Common down (Quadrant 3)
ENSMUSG00000013766	Ly6g6e	Common down (Quadrant 3)
ENSMUSG00000057454	Lypd3	Common down (Quadrant 3)
ENSMUSG00000032530	Lyzl4	Common down (Quadrant 3)
ENSMUSG00000056947	Mab21l1	Common down (Quadrant 3)
ENSMUSG00000041886	Macc1	Common down (Quadrant 3)
ENSMUSG00000027375	Mal	Common down (Quadrant 3)
ENSMUSG00000061143	Maml3	Common down (Quadrant 3)
ENSMUSG00000015222	Map2	Common down (Quadrant 3)
ENSMUSG00000021754	Map3k1	Common down (Quadrant 3)
ENSMUSG00000031853	Map3k21	Common down (Quadrant 3)
ENSMUSG00000019996	Map7	Common down (Quadrant 3)
ENSMUSG00000004864	Mapk13	Common down (Quadrant 3)
ENSMUSG00000021636	Marveld2	Common down (Quadrant 3)
ENSMUSG00000001672	Marveld3	Common down (Quadrant 3)
ENSMUSG00000038732	Mboat1	Common down (Quadrant 3)
ENSMUSG00000061068	Mcpt4	Common down (Quadrant 3)
ENSMUSG00000032717	Mdfi	Common down (Quadrant 3)
ENSMUSG00000022780	Meltf	Common down (Quadrant 3)
ENSMUSG00000026303	Mlph	Common down (Quadrant 3)
ENSMUSG00000031790	Mmp15	Common down (Quadrant 3)
ENSMUSG00000031740	Mmp2	Common down (Quadrant 3)
ENSMUSG00000070323	Mmp27	Common down (Quadrant 3)
ENSMUSG00000043613	Mmp3	Common down (Quadrant 3)
ENSMUSG00000054641	Mmrn1	Common down (Quadrant 3)
ENSMUSG00000020000	Moxd1	Common down (Quadrant 3)
ENSMUSG00000056569	Mpz	Common down (Quadrant 3)
ENSMUSG00000070305	Mpzl3	Common down (Quadrant 3)
ENSMUSG00000070547	Mrgprb1	Common down (Quadrant 3)
ENSMUSG00000050425	Mrgprb2	Common down (Quadrant 3)
ENSMUSG00000021469	Msx2	Common down (Quadrant 3)
ENSMUSG00000039431	Mtmr7	Common down (Quadrant 3)
ENSMUSG00000042784	Muc1	Common down (Quadrant 3)
ENSMUSG00000022824	Muc13	Common down (Quadrant 3)
ENSMUSG00000050808	Muc15	Common down (Quadrant 3)
ENSMUSG00000035638	Muc20	Common down (Quadrant 3)
ENSMUSG00000118672	Muc4	Common down (Quadrant 3)
ENSMUSG00000019982	Myb	Common down (Quadrant 3)
ENSMUSG00000000631	Myo18a	Common down (Quadrant 3)
ENSMUSG00000033590	Myo5c	Common down (Quadrant 3)
ENSMUSG00000052512	Nav2	Common down (Quadrant 3)
ENSMUSG00000066877	Nck2	Common down (Quadrant 3)
ENSMUSG00000006411	Nectin4	Common down (Quadrant 3)
ENSMUSG00000039835	Nhsl1	Common down (Quadrant 3)
ENSMUSG00000038879	Nipal2	Common down (Quadrant 3)
ENSMUSG00000030562	Nox4	Common down (Quadrant 3)
ENSMUSG00000003849	Nqo1	Common down (Quadrant 3)
ENSMUSG00000021775	Nr1d2	Common down (Quadrant 3)
ENSMUSG00000039481	Nrtn	Common down (Quadrant 3)
ENSMUSG00000066392	Nrxn3	Common down (Quadrant 3)
ENSMUSG00000074121	Ntf5	Common down (Quadrant 3)
ENSMUSG00000020902	Ntn1	Common down (Quadrant 3)
ENSMUSG00000059857	Ntng1	Common down (Quadrant 3)
ENSMUSG00000021224	Numb	Common down (Quadrant 3)
ENSMUSG00000030091	Nup210	Common down (Quadrant 3)
ENSMUSG00000031410	Nxf7	Common down (Quadrant 3)
ENSMUSG00000021638	Ocln	Common down (Quadrant 3)
ENSMUSG00000026158	Ogfrl1	Common down (Quadrant 3)
ENSMUSG00000029822	Osbpl3	Common down (Quadrant 3)
ENSMUSG00000037279	Ovol2	Common down (Quadrant 3)
ENSMUSG00000028927	Padi2	Common down (Quadrant 3)
ENSMUSG00000030774	Pak1	Common down (Quadrant 3)
ENSMUSG00000021223	Papln	Common down (Quadrant 3)
ENSMUSG00000073530	Pappa2	Common down (Quadrant 3)
ENSMUSG00000041423	Paqr6	Common down (Quadrant 3)
ENSMUSG00000061859	Patj	Common down (Quadrant 3)
ENSMUSG00000050505	Pcdh20	Common down (Quadrant 3)
ENSMUSG00000019851	Perp	Common down (Quadrant 3)
ENSMUSG00000031870	Pgr	Common down (Quadrant 3)
ENSMUSG00000020205	Phlda1	Common down (Quadrant 3)
ENSMUSG00000041482	Piezo2	Common down (Quadrant 3)
ENSMUSG00000099877	Pinc	Common down (Quadrant 3)
ENSMUSG00000026413	Pkp1	Common down (Quadrant 3)
ENSMUSG00000054065	Pkp3	Common down (Quadrant 3)
ENSMUSG00000029134	Plb1	Common down (Quadrant 3)
ENSMUSG00000024998	Plce1	Common down (Quadrant 3)
ENSMUSG00000029055	Plch2	Common down (Quadrant 3)
ENSMUSG00000041757	Plekha6	Common down (Quadrant 3)
ENSMUSG00000030701	Plekhb1	Common down (Quadrant 3)
ENSMUSG00000038167	Plekhg6	Common down (Quadrant 3)
ENSMUSG00000060716	Plekhh1	Common down (Quadrant 3)
ENSMUSG00000078485	Plekhn1	Common down (Quadrant 3)
ENSMUSG00000035818	Plekhs1	Common down (Quadrant 3)
ENSMUSG00000032068	Plet1	Common down (Quadrant 3)
ENSMUSG00000021701	Plk2	Common down (Quadrant 3)
ENSMUSG00000049493	Pls1	Common down (Quadrant 3)
ENSMUSG00000034845	Plvap	Common down (Quadrant 3)
ENSMUSG00000053646	Plxnb1	Common down (Quadrant 3)
ENSMUSG00000034607	Pof1b	Common down (Quadrant 3)
ENSMUSG00000069378	Prdm6	Common down (Quadrant 3)
ENSMUSG00000005268	Prlr	Common down (Quadrant 3)
ENSMUSG00000073600	Prob1	Common down (Quadrant 3)
ENSMUSG00000024386	Proc	Common down (Quadrant 3)
ENSMUSG00000029086	Prom1	Common down (Quadrant 3)
ENSMUSG00000027376	Prom2	Common down (Quadrant 3)
ENSMUSG00000047040	Prr15l	Common down (Quadrant 3)
ENSMUSG00000027171	Prrg4	Common down (Quadrant 3)
ENSMUSG00000030800	Prss8	Common down (Quadrant 3)
ENSMUSG00000053198	Prx	Common down (Quadrant 3)
ENSMUSG00000043430	Psapl1	Common down (Quadrant 3)
ENSMUSG00000024338	Psmb8	Common down (Quadrant 3)
ENSMUSG00000023972	Ptk7	Common down (Quadrant 3)
ENSMUSG00000029838	Ptn	Common down (Quadrant 3)
ENSMUSG00000033295	Ptprf	Common down (Quadrant 3)
ENSMUSG00000027832	Ptx3	Common down (Quadrant 3)
ENSMUSG00000043587	Pxylp1	Common down (Quadrant 3)
ENSMUSG00000078949	R3hdml	Common down (Quadrant 3)
ENSMUSG00000031488	Rab11fip1	Common down (Quadrant 3)
ENSMUSG00000017639	Rab11fip4	Common down (Quadrant 3)
ENSMUSG00000021062	Rab15	Common down (Quadrant 3)
ENSMUSG00000026304	Rab17	Common down (Quadrant 3)
ENSMUSG00000008601	Rab25	Common down (Quadrant 3)
ENSMUSG00000024511	Rab27b	Common down (Quadrant 3)
ENSMUSG00000034353	Ramp1	Common down (Quadrant 3)
ENSMUSG00000029602	Rasal1	Common down (Quadrant 3)
ENSMUSG00000043003	Rasef	Common down (Quadrant 3)
ENSMUSG00000020374	Rasgef1c	Common down (Quadrant 3)
ENSMUSG00000032356	Rasgrf1	Common down (Quadrant 3)
ENSMUSG00000029370	Rassf6	Common down (Quadrant 3)
ENSMUSG00000038618	Rassf7	Common down (Quadrant 3)
ENSMUSG00000043639	Rbm20	Common down (Quadrant 3)
ENSMUSG00000042453	Reln	Common down (Quadrant 3)
ENSMUSG00000022270	Retreg1	Common down (Quadrant 3)
ENSMUSG00000034226	Rhov	Common down (Quadrant 3)
ENSMUSG00000005251	Ripk4	Common down (Quadrant 3)
ENSMUSG00000031438	Rnf128	Common down (Quadrant 3)
ENSMUSG00000036492	Rnf39	Common down (Quadrant 3)
ENSMUSG00000034177	Rnf43	Common down (Quadrant 3)
ENSMUSG00000038900	Rpl12	Common down (Quadrant 3)
ENSMUSG00000039001	Rps21	Common down (Quadrant 3)
ENSMUSG00000090733	Rps27	Common down (Quadrant 3)
ENSMUSG00000012848	Rps5	Common down (Quadrant 3)
ENSMUSG00000022952	Runx1	Common down (Quadrant 3)
ENSMUSG00000039153	Runx2	Common down (Quadrant 3)
ENSMUSG00000030433	Sbk2	Common down (Quadrant 3)
ENSMUSG00000035673	Sbno2	Common down (Quadrant 3)
ENSMUSG00000032181	Scg3	Common down (Quadrant 3)
ENSMUSG00000002565	Scin	Common down (Quadrant 3)
ENSMUSG00000044770	Scml4	Common down (Quadrant 3)
ENSMUSG00000030340	Scnn1a	Common down (Quadrant 3)
ENSMUSG00000030873	Scnn1b	Common down (Quadrant 3)
ENSMUSG00000000216	Scnn1g	Common down (Quadrant 3)
ENSMUSG00000038677	Scube3	Common down (Quadrant 3)
ENSMUSG00000017009	Sdc4	Common down (Quadrant 3)
ENSMUSG00000003585	Sec14l2	Common down (Quadrant 3)
ENSMUSG00000021451	Sema4d	Common down (Quadrant 3)
ENSMUSG00000038777	Sema6c	Common down (Quadrant 3)
ENSMUSG00000023232	Serinc2	Common down (Quadrant 3)
ENSMUSG00000067006	Serpinb5	Common down (Quadrant 3)
ENSMUSG00000024548	Setbp1	Common down (Quadrant 3)
ENSMUSG00000047281	Sfn	Common down (Quadrant 3)
ENSMUSG00000031548	Sfrp1	Common down (Quadrant 3)
ENSMUSG00000018822	Sfrp5	Common down (Quadrant 3)
ENSMUSG00000019970	Sgk1	Common down (Quadrant 3)
ENSMUSG00000032261	Sh3bgrl2	Common down (Quadrant 3)
ENSMUSG00000037541	Shank2	Common down (Quadrant 3)
ENSMUSG00000044461	Shisa2	Common down (Quadrant 3)
ENSMUSG00000027833	Shox2	Common down (Quadrant 3)
ENSMUSG00000018387	Shroom1	Common down (Quadrant 3)
ENSMUSG00000029381	Shroom3	Common down (Quadrant 3)
ENSMUSG00000022696	Sidt1	Common down (Quadrant 3)
ENSMUSG00000055717	Slain1	Common down (Quadrant 3)
ENSMUSG00000058921	Slc10a5	Common down (Quadrant 3)
ENSMUSG00000024597	Slc12a2	Common down (Quadrant 3)
ENSMUSG00000021553	Slc28a3	Common down (Quadrant 3)
ENSMUSG00000057060	Slc35f3	Common down (Quadrant 3)
ENSMUSG00000044026	Slc35g1	Common down (Quadrant 3)
ENSMUSG00000024036	Slc37a1	Common down (Quadrant 3)
ENSMUSG00000022464	Slc38a4	Common down (Quadrant 3)
ENSMUSG00000013275	Slc41a1	Common down (Quadrant 3)
ENSMUSG00000007034	Slc44a4	Common down (Quadrant 3)
ENSMUSG00000026435	Slc45a3	Common down (Quadrant 3)
ENSMUSG00000011034	Slc5a1	Common down (Quadrant 3)
ENSMUSG00000000792	Slc5a5	Common down (Quadrant 3)
ENSMUSG00000023945	Slc5a7	Common down (Quadrant 3)
ENSMUSG00000020062	Slc5a8	Common down (Quadrant 3)
ENSMUSG00000028544	Slc5a9	Common down (Quadrant 3)
ENSMUSG00000030096	Slc6a6	Common down (Quadrant 3)
ENSMUSG00000019558	Slc6a8	Common down (Quadrant 3)
ENSMUSG00000031596	Slc7a2	Common down (Quadrant 3)
ENSMUSG00000063975	Slco1a5	Common down (Quadrant 3)
ENSMUSG00000032548	Slco2a1	Common down (Quadrant 3)
ENSMUSG00000038059	Smim3	Common down (Quadrant 3)
ENSMUSG00000074300	Smim31	Common down (Quadrant 3)
ENSMUSG00000109305	Smim38	Common down (Quadrant 3)
ENSMUSG00000026258	Snorc	Common down (Quadrant 3)
ENSMUSG00000036169	Sostdc1	Common down (Quadrant 3)
ENSMUSG00000045314	Sowahb	Common down (Quadrant 3)
ENSMUSG00000033006	Sox10	Common down (Quadrant 3)
ENSMUSG00000000567	Sox9	Common down (Quadrant 3)
ENSMUSG00000024215	Spdef	Common down (Quadrant 3)
ENSMUSG00000042331	Specc1	Common down (Quadrant 3)
ENSMUSG00000027315	Spint1	Common down (Quadrant 3)
ENSMUSG00000074227	Spint2	Common down (Quadrant 3)
ENSMUSG00000020798	Spns3	Common down (Quadrant 3)
ENSMUSG00000029304	Spp1	Common down (Quadrant 3)
ENSMUSG00000021061	Sptb	Common down (Quadrant 3)
ENSMUSG00000067889	Sptbn2	Common down (Quadrant 3)
ENSMUSG00000039092	Sptlc3	Common down (Quadrant 3)
ENSMUSG00000090084	Srpx	Common down (Quadrant 3)
ENSMUSG00000031995	St14	Common down (Quadrant 3)
ENSMUSG00000017400	Stac2	Common down (Quadrant 3)
ENSMUSG00000030688	Stard10	Common down (Quadrant 3)
ENSMUSG00000020303	Stc2	Common down (Quadrant 3)
ENSMUSG00000015653	Steap2	Common down (Quadrant 3)
ENSMUSG00000027030	Stk39	Common down (Quadrant 3)
ENSMUSG00000020961	Ston2	Common down (Quadrant 3)
ENSMUSG00000003271	Sult2b1	Common down (Quadrant 3)
ENSMUSG00000019737	Syne4	Common down (Quadrant 3)
ENSMUSG00000043079	Synpo	Common down (Quadrant 3)
ENSMUSG00000061762	Tac1	Common down (Quadrant 3)
ENSMUSG00000051397	Tacstd2	Common down (Quadrant 3)
ENSMUSG00000052302	Tbc1d30	Common down (Quadrant 3)
ENSMUSG00000009097	Tbx1	Common down (Quadrant 3)
ENSMUSG00000027868	Tbx15	Common down (Quadrant 3)
ENSMUSG00000018604	Tbx3	Common down (Quadrant 3)
ENSMUSG00000086847	Tbx3os2	Common down (Quadrant 3)
ENSMUSG00000042712	Tceal9	Common down (Quadrant 3)
ENSMUSG00000030796	Tead2	Common down (Quadrant 3)
ENSMUSG00000049336	Tenm2	Common down (Quadrant 3)
ENSMUSG00000021359	Tfap2a	Common down (Quadrant 3)
ENSMUSG00000025927	Tfap2b	Common down (Quadrant 3)
ENSMUSG00000028640	Tfap2c	Common down (Quadrant 3)
ENSMUSG00000026380	Tfcp2l1	Common down (Quadrant 3)
ENSMUSG00000021253	Tgfb3	Common down (Quadrant 3)
ENSMUSG00000047407	Tgif1	Common down (Quadrant 3)
ENSMUSG00000032289	Thsd4	Common down (Quadrant 3)
ENSMUSG00000110218	Tincr	Common down (Quadrant 3)
ENSMUSG00000034917	Tjp3	Common down (Quadrant 3)
ENSMUSG00000028132	Tlcd4	Common down (Quadrant 3)
ENSMUSG00000027800	Tm4sf1	Common down (Quadrant 3)
ENSMUSG00000019734	Tmc4	Common down (Quadrant 3)
ENSMUSG00000050854	Tmem125	Common down (Quadrant 3)
ENSMUSG00000034324	Tmem132c	Common down (Quadrant 3)
ENSMUSG00000054871	Tmem158	Common down (Quadrant 3)
ENSMUSG00000023367	Tmem176a	Common down (Quadrant 3)
ENSMUSG00000036687	Tmem184a	Common down (Quadrant 3)
ENSMUSG00000034435	Tmem30b	Common down (Quadrant 3)
ENSMUSG00000059900	Tmem40	Common down (Quadrant 3)
ENSMUSG00000028786	Tmem54	Common down (Quadrant 3)
ENSMUSG00000037129	Tmprss13	Common down (Quadrant 3)
ENSMUSG00000000385	Tmprss2	Common down (Quadrant 3)
ENSMUSG00000027692	Tnik	Common down (Quadrant 3)
ENSMUSG00000017607	Tns4	Common down (Quadrant 3)
ENSMUSG00000074607	Tox2	Common down (Quadrant 3)
ENSMUSG00000043668	Tox3	Common down (Quadrant 3)
ENSMUSG00000027506	Tpd52	Common down (Quadrant 3)
ENSMUSG00000040046	Tph1	Common down (Quadrant 3)
ENSMUSG00000048707	Tprn	Common down (Quadrant 3)
ENSMUSG00000033825	Tpsb2	Common down (Quadrant 3)
ENSMUSG00000032013	Trim29	Common down (Quadrant 3)
ENSMUSG00000042766	Trim46	Common down (Quadrant 3)
ENSMUSG00000038260	Trpm4	Common down (Quadrant 3)
ENSMUSG00000038679	Trps1	Common down (Quadrant 3)
ENSMUSG00000028699	Tspan1	Common down (Quadrant 3)
ENSMUSG00000030351	Tspan11	Common down (Quadrant 3)
ENSMUSG00000034127	Tspan8	Common down (Quadrant 3)
ENSMUSG00000034919	Ttc22	Common down (Quadrant 3)
ENSMUSG00000028555	Ttc39a	Common down (Quadrant 3)
ENSMUSG00000046782	Ttc6	Common down (Quadrant 3)
ENSMUSG00000029074	Ttll10	Common down (Quadrant 3)
ENSMUSG00000026202	Tuba4a	Common down (Quadrant 3)
ENSMUSG00000027298	Tyro3	Common down (Quadrant 3)
ENSMUSG00000032307	Ube2q2	Common down (Quadrant 3)
ENSMUSG00000032854	Ugt8a	Common down (Quadrant 3)
ENSMUSG00000041523	Upk2	Common down (Quadrant 3)
ENSMUSG00000022435	Upk3a	Common down (Quadrant 3)
ENSMUSG00000025481	Urah	Common down (Quadrant 3)
ENSMUSG00000022479	Vdr	Common down (Quadrant 3)
ENSMUSG00000038775	Vill	Common down (Quadrant 3)
ENSMUSG00000032528	Vipr1	Common down (Quadrant 3)
ENSMUSG00000066894	Vsig10	Common down (Quadrant 3)
ENSMUSG00000025082	Vwa2	Common down (Quadrant 3)
ENSMUSG00000000983	Wfdc18	Common down (Quadrant 3)
ENSMUSG00000017723	Wfdc2	Common down (Quadrant 3)
ENSMUSG00000020218	Wif1	Common down (Quadrant 3)
ENSMUSG00000037989	Wnk2	Common down (Quadrant 3)
ENSMUSG00000036856	Wnt4	Common down (Quadrant 3)
ENSMUSG00000030170	Wnt5b	Common down (Quadrant 3)
ENSMUSG00000022382	Wnt7b	Common down (Quadrant 3)
ENSMUSG00000018849	Wwc1	Common down (Quadrant 3)
ENSMUSG00000037638	Zbtb42	Common down (Quadrant 3)
ENSMUSG00000025255	Zfhx4	Common down (Quadrant 3)
ENSMUSG00000079215	Zfp664	Common down (Quadrant 3)
ENSMUSG00000039238	Zfp750	Common down (Quadrant 3)
ENSMUSG00000034949	Zfr2	Common down (Quadrant 3)
ENSMUSG00000002266	Zim1	Common down (Quadrant 3)

## Sheet: CV vs CS & AV vs AS common DEGs
gene_id	gene_name	type	Corresponding to figure 6B
ENSMUSG00000117901	-	Common up (Quadrant 1)
ENSMUSG00000107002	0610012G03Rik	Common up (Quadrant 1)
ENSMUSG00000085151	1110018N20Rik	Common up (Quadrant 1)
ENSMUSG00000037971	1110032A03Rik	Common up (Quadrant 1)
ENSMUSG00000054676	1600014C10Rik	Common up (Quadrant 1)
ENSMUSG00000051606	2010001K21Rik	Common up (Quadrant 1)
ENSMUSG00000042041	2010003K11Rik	Common up (Quadrant 1)
ENSMUSG00000050705	2310061I04Rik	Common up (Quadrant 1)
ENSMUSG00000101089	2610016A17Rik	Common up (Quadrant 1)
ENSMUSG00000010277	2610507B11Rik	Common up (Quadrant 1)
ENSMUSG00000055972	2810407A14Rik	Common up (Quadrant 1)
ENSMUSG00000100594	2810414N06Rik	Common up (Quadrant 1)
ENSMUSG00000053714	4732471J01Rik	Common up (Quadrant 1)
ENSMUSG00000025871	4833439L19Rik	Common up (Quadrant 1)
ENSMUSG00000031938	4931406C07Rik	Common up (Quadrant 1)
ENSMUSG00000107879	9330102E08Rik	Common up (Quadrant 1)
ENSMUSG00000004360	9330159F19Rik	Common up (Quadrant 1)
ENSMUSG00000043122	A530016L24Rik	Common up (Quadrant 1)
ENSMUSG00000097124	A530020G20Rik	Common up (Quadrant 1)
ENSMUSG00000085139	A730046J19Rik	Common up (Quadrant 1)
ENSMUSG00000103149	AA914427	Common up (Quadrant 1)
ENSMUSG00000029482	Aacs	Common up (Quadrant 1)
ENSMUSG00000035642	Aamdc	Common up (Quadrant 1)
ENSMUSG00000025894	Aasdhppt	Common up (Quadrant 1)
ENSMUSG00000057880	Abat	Common up (Quadrant 1)
ENSMUSG00000015243	Abca1	Common up (Quadrant 1)
ENSMUSG00000028125	Abca4	Common up (Quadrant 1)
ENSMUSG00000028970	Abcb1b	Common up (Quadrant 1)
ENSMUSG00000028973	Abcb8	Common up (Quadrant 1)
ENSMUSG00000022822	Abcc5	Common up (Quadrant 1)
ENSMUSG00000055782	Abcd2	Common up (Quadrant 1)
ENSMUSG00000028127	Abcd3	Common up (Quadrant 1)
ENSMUSG00000000686	Abhd15	Common up (Quadrant 1)
ENSMUSG00000032540	Abhd5	Common up (Quadrant 1)
ENSMUSG00000025277	Abhd6	Common up (Quadrant 1)
ENSMUSG00000032735	Ablim3	Common up (Quadrant 1)
ENSMUSG00000010651	Acaa1b	Common up (Quadrant 1)
ENSMUSG00000020532	Acaca	Common up (Quadrant 1)
ENSMUSG00000042010	Acacb	Common up (Quadrant 1)
ENSMUSG00000029456	Acad10	Common up (Quadrant 1)
ENSMUSG00000090150	Acad11	Common up (Quadrant 1)
ENSMUSG00000042647	Acad12	Common up (Quadrant 1)
ENSMUSG00000062908	Acadm	Common up (Quadrant 1)
ENSMUSG00000029545	Acads	Common up (Quadrant 1)
ENSMUSG00000030861	Acadsb	Common up (Quadrant 1)
ENSMUSG00000018574	Acadvl	Common up (Quadrant 1)
ENSMUSG00000032047	Acat1	Common up (Quadrant 1)
ENSMUSG00000023832	Acat2	Common up (Quadrant 1)
ENSMUSG00000056938	Acbd4	Common up (Quadrant 1)
ENSMUSG00000044337	Ackr3	Common up (Quadrant 1)
ENSMUSG00000028405	Aco1	Common up (Quadrant 1)
ENSMUSG00000022477	Aco2	Common up (Quadrant 1)
ENSMUSG00000020777	Acox1	Common up (Quadrant 1)
ENSMUSG00000001348	Acp5	Common up (Quadrant 1)
ENSMUSG00000018796	Acsl1	Common up (Quadrant 1)
ENSMUSG00000030935	Acsm3	Common up (Quadrant 1)
ENSMUSG00000030972	Acsm5	Common up (Quadrant 1)
ENSMUSG00000027605	Acss2	Common up (Quadrant 1)
ENSMUSG00000035948	Acss3	Common up (Quadrant 1)
ENSMUSG00000059430	Actg2	Common up (Quadrant 1)
ENSMUSG00000026834	Acvr1c	Common up (Quadrant 1)
ENSMUSG00000024866	Acy3	Common up (Quadrant 1)
ENSMUSG00000049538	Adamts16	Common up (Quadrant 1)
ENSMUSG00000070469	Adamtsl3	Common up (Quadrant 1)
ENSMUSG00000020431	Adcy1	Common up (Quadrant 1)
ENSMUSG00000026567	Adcy10	Common up (Quadrant 1)
ENSMUSG00000022840	Adcy5	Common up (Quadrant 1)
ENSMUSG00000044017	Adgrd1	Common up (Quadrant 1)
ENSMUSG00000056492	Adgrf5	Common up (Quadrant 1)
ENSMUSG00000031298	Adgrg2	Common up (Quadrant 1)
ENSMUSG00000039167	Adgrl4	Common up (Quadrant 1)
ENSMUSG00000074207	Adh1	Common up (Quadrant 1)
ENSMUSG00000025911	Adhfe1	Common up (Quadrant 1)
ENSMUSG00000020629	Adi1	Common up (Quadrant 1)
ENSMUSG00000044405	Adig	Common up (Quadrant 1)
ENSMUSG00000022878	Adipoq	Common up (Quadrant 1)
ENSMUSG00000030168	Adipor2	Common up (Quadrant 1)
ENSMUSG00000039197	Adk	Common up (Quadrant 1)
ENSMUSG00000031489	Adrb3	Common up (Quadrant 1)
ENSMUSG00000058022	Adtrp	Common up (Quadrant 1)
ENSMUSG00000029094	Afap1	Common up (Quadrant 1)
ENSMUSG00000038302	Afg1l	Common up (Quadrant 1)
ENSMUSG00000029722	Agfg2	Common up (Quadrant 1)
ENSMUSG00000033400	Agl	Common up (Quadrant 1)
ENSMUSG00000050103	Agmo	Common up (Quadrant 1)
ENSMUSG00000026922	Agpat2	Common up (Quadrant 1)
ENSMUSG00000001211	Agpat3	Common up (Quadrant 1)
ENSMUSG00000031980	Agt	Common up (Quadrant 1)
ENSMUSG00000029772	Ahcyl2	Common up (Quadrant 1)
ENSMUSG00000036932	Aifm1	Common up (Quadrant 1)
ENSMUSG00000020085	Aifm2	Common up (Quadrant 1)
ENSMUSG00000028792	Ak2	Common up (Quadrant 1)
ENSMUSG00000024782	Ak3	Common up (Quadrant 1)
ENSMUSG00000039058	Ak5	Common up (Quadrant 1)
ENSMUSG00000038587	Akap12	Common up (Quadrant 1)
ENSMUSG00000039166	Akap7	Common up (Quadrant 1)
ENSMUSG00000045410	Akr1e1	Common up (Quadrant 1)
ENSMUSG00000004056	Akt2	Common up (Quadrant 1)
ENSMUSG00000028393	Alad	Common up (Quadrant 1)
ENSMUSG00000032786	Alas1	Common up (Quadrant 1)
ENSMUSG00000025270	Alas2	Common up (Quadrant 1)
ENSMUSG00000053279	Aldh1a1	Common up (Quadrant 1)
ENSMUSG00000013584	Aldh1a2	Common up (Quadrant 1)
ENSMUSG00000024747	Aldh1a7	Common up (Quadrant 1)
ENSMUSG00000030088	Aldh1l1	Common up (Quadrant 1)
ENSMUSG00000029455	Aldh2	Common up (Quadrant 1)
ENSMUSG00000075296	Aldh3b2	Common up (Quadrant 1)
ENSMUSG00000028737	Aldh4a1	Common up (Quadrant 1)
ENSMUSG00000035936	Aldh5a1	Common up (Quadrant 1)
ENSMUSG00000021238	Aldh6a1	Common up (Quadrant 1)
ENSMUSG00000026687	Aldh9a1	Common up (Quadrant 1)
ENSMUSG00000032059	Alg9	Common up (Quadrant 1)
ENSMUSG00000031751	Amfr	Common up (Quadrant 1)
ENSMUSG00000013076	Amotl1	Common up (Quadrant 1)
ENSMUSG00000032531	Amotl2	Common up (Quadrant 1)
ENSMUSG00000005686	Ampd3	Common up (Quadrant 1)
ENSMUSG00000002289	Angptl4	Common up (Quadrant 1)
ENSMUSG00000074771	Ankef1	Common up (Quadrant 1)
ENSMUSG00000020864	Ankrd40	Common up (Quadrant 1)
ENSMUSG00000048307	Ankrd46	Common up (Quadrant 1)
ENSMUSG00000024219	Anks1	Common up (Quadrant 1)
ENSMUSG00000037949	Ano10	Common up (Quadrant 1)
ENSMUSG00000019326	Aoc3	Common up (Quadrant 1)
ENSMUSG00000063558	Aox1	Common up (Quadrant 1)
ENSMUSG00000002957	Ap2a2	Common up (Quadrant 1)
ENSMUSG00000024480	Ap3s1	Common up (Quadrant 1)
ENSMUSG00000071847	Apcdd1	Common up (Quadrant 1)
ENSMUSG00000010911	Apip	Common up (Quadrant 1)
ENSMUSG00000031996	Aplp2	Common up (Quadrant 1)
ENSMUSG00000033096	Apmap	Common up (Quadrant 1)
ENSMUSG00000028427	Aqp7	Common up (Quadrant 1)
ENSMUSG00000046532	Ar	Common up (Quadrant 1)
ENSMUSG00000053199	Arhgap20	Common up (Quadrant 1)
ENSMUSG00000039831	Arhgap29	Common up (Quadrant 1)
ENSMUSG00000024944	Arl2	Common up (Quadrant 1)
ENSMUSG00000047446	Arl4a	Common up (Quadrant 1)
ENSMUSG00000034842	Art3	Common up (Quadrant 1)
ENSMUSG00000048040	Arxes2	Common up (Quadrant 1)
ENSMUSG00000020704	Asic2	Common up (Quadrant 1)
ENSMUSG00000029752	Asns	Common up (Quadrant 1)
ENSMUSG00000020774	Aspa	Common up (Quadrant 1)
ENSMUSG00000024759	Atl3	Common up (Quadrant 1)
ENSMUSG00000007097	Atp1a2	Common up (Quadrant 1)
ENSMUSG00000040907	Atp1a3	Common up (Quadrant 1)
ENSMUSG00000026463	Atp2b4	Common up (Quadrant 1)
ENSMUSG00000025428	Atp5a1	Common up (Quadrant 1)
ENSMUSG00000025393	Atp5b	Common up (Quadrant 1)
ENSMUSG00000025781	Atp5c1	Common up (Quadrant 1)
ENSMUSG00000003072	Atp5d	Common up (Quadrant 1)
ENSMUSG00000038690	Atp5j2	Common up (Quadrant 1)
ENSMUSG00000000563	Atp5pb	Common up (Quadrant 1)
ENSMUSG00000019302	Atp6v0a1	Common up (Quadrant 1)
ENSMUSG00000013160	Atp6v0d1	Common up (Quadrant 1)
ENSMUSG00000039347	Atp6v0e2	Common up (Quadrant 1)
ENSMUSG00000019210	Atp6v1e1	Common up (Quadrant 1)
ENSMUSG00000033793	Atp6v1h	Common up (Quadrant 1)
ENSMUSG00000042709	Atpaf2	Common up (Quadrant 1)
ENSMUSG00000013622	Atraid	Common up (Quadrant 1)
ENSMUSG00000027312	Atrn	Common up (Quadrant 1)
ENSMUSG00000016541	Atxn10	Common up (Quadrant 1)
ENSMUSG00000021460	Auh	Common up (Quadrant 1)
ENSMUSG00000000142	Axin2	Common up (Quadrant 1)
ENSMUSG00000034780	B3galt1	Common up (Quadrant 1)
ENSMUSG00000033849	B3galt2	Common up (Quadrant 1)
ENSMUSG00000051950	B3glct	Common up (Quadrant 1)
ENSMUSG00000084960	B430010I23Rik	Common up (Quadrant 1)
ENSMUSG00000052139	Babam2	Common up (Quadrant 1)
ENSMUSG00000028416	Bag1	Common up (Quadrant 1)
ENSMUSG00000037316	Bag4	Common up (Quadrant 1)
ENSMUSG00000036299	BC031181	Common up (Quadrant 1)
ENSMUSG00000002015	Bcap31	Common up (Quadrant 1)
ENSMUSG00000030826	Bcat2	Common up (Quadrant 1)
ENSMUSG00000027792	Bche	Common up (Quadrant 1)
ENSMUSG00000060376	Bckdha	Common up (Quadrant 1)
ENSMUSG00000032263	Bckdhb	Common up (Quadrant 1)
ENSMUSG00000030802	Bckdk	Common up (Quadrant 1)
ENSMUSG00000009112	Bcl2l13	Common up (Quadrant 1)
ENSMUSG00000067787	Blcap	Common up (Quadrant 1)
ENSMUSG00000038982	Bloc1s5	Common up (Quadrant 1)
ENSMUSG00000021835	Bmp4	Common up (Quadrant 1)
ENSMUSG00000039004	Bmp6	Common up (Quadrant 1)
ENSMUSG00000025105	Bnc1	Common up (Quadrant 1)
ENSMUSG00000028487	Bnc2	Common up (Quadrant 1)
ENSMUSG00000078566	Bnip3	Common up (Quadrant 1)
ENSMUSG00000045160	Bola3	Common up (Quadrant 1)
ENSMUSG00000038286	Bphl	Common up (Quadrant 1)
ENSMUSG00000026617	Bpnt1	Common up (Quadrant 1)
ENSMUSG00000071657	Bscl2	Common up (Quadrant 1)
ENSMUSG00000021900	Btd	Common up (Quadrant 1)
ENSMUSG00000040283	Btnl9	Common up (Quadrant 1)
ENSMUSG00000116138	C030006K11Rik	Common up (Quadrant 1)
ENSMUSG00000058914	C1qtnf3	Common up (Quadrant 1)
ENSMUSG00000038527	C1rl	Common up (Quadrant 1)
ENSMUSG00000024371	C2	Common up (Quadrant 1)
ENSMUSG00000032120	C2cd2l	Common up (Quadrant 1)
ENSMUSG00000024164	C3	Common up (Quadrant 1)
ENSMUSG00000028300	C9orf72	Common up (Quadrant 1)
ENSMUSG00000040957	Cables1	Common up (Quadrant 1)
ENSMUSG00000028532	Cachd1	Common up (Quadrant 1)
ENSMUSG00000057914	Cacnb2	Common up (Quadrant 1)
ENSMUSG00000029761	Cald1	Common up (Quadrant 1)
ENSMUSG00000026509	Capn2	Common up (Quadrant 1)
ENSMUSG00000027559	Car3	Common up (Quadrant 1)
ENSMUSG00000000805	Car4	Common up (Quadrant 1)
ENSMUSG00000031373	Car5b	Common up (Quadrant 1)
ENSMUSG00000027187	Cat	Common up (Quadrant 1)
ENSMUSG00000007655	Cav1	Common up (Quadrant 1)
ENSMUSG00000000058	Cav2	Common up (Quadrant 1)
ENSMUSG00000004044	Cavin1	Common up (Quadrant 1)
ENSMUSG00000045954	Cavin2	Common up (Quadrant 1)
ENSMUSG00000037060	Cavin3	Common up (Quadrant 1)
ENSMUSG00000046318	Ccbe1	Common up (Quadrant 1)
ENSMUSG00000022665	Ccdc80	Common up (Quadrant 1)
ENSMUSG00000032878	Ccdc85a	Common up (Quadrant 1)
ENSMUSG00000037362	Ccn3	Common up (Quadrant 1)
ENSMUSG00000000184	Ccnd2	Common up (Quadrant 1)
ENSMUSG00000063015	Ccni	Common up (Quadrant 1)
ENSMUSG00000025510	Cd151	Common up (Quadrant 1)
ENSMUSG00000008845	Cd163	Common up (Quadrant 1)
ENSMUSG00000028076	Cd1d1	Common up (Quadrant 1)
ENSMUSG00000017309	Cd300lg	Common up (Quadrant 1)
ENSMUSG00000060703	Cd302	Common up (Quadrant 1)
ENSMUSG00000002308	Cd320	Common up (Quadrant 1)
ENSMUSG00000002944	Cd36	Common up (Quadrant 1)
ENSMUSG00000037706	Cd81	Common up (Quadrant 1)
ENSMUSG00000027435	Cd93	Common up (Quadrant 1)
ENSMUSG00000035776	Cd99l2	Common up (Quadrant 1)
ENSMUSG00000040452	Cdh12	Common up (Quadrant 1)
ENSMUSG00000012819	Cdh23	Common up (Quadrant 1)
ENSMUSG00000031871	Cdh5	Common up (Quadrant 1)
ENSMUSG00000073802	Cdkn2b	Common up (Quadrant 1)
ENSMUSG00000033022	Cdo1	Common up (Quadrant 1)
ENSMUSG00000030878	Cdr2	Common up (Quadrant 1)
ENSMUSG00000034957	Cebpa	Common up (Quadrant 1)
ENSMUSG00000056267	Cep70	Common up (Quadrant 1)
ENSMUSG00000015714	Cers2	Common up (Quadrant 1)
ENSMUSG00000056973	Ces1d	Common up (Quadrant 1)
ENSMUSG00000031725	Ces1f	Common up (Quadrant 1)
ENSMUSG00000060560	Ces4a	Common up (Quadrant 1)
ENSMUSG00000061780	Cfd	Common up (Quadrant 1)
ENSMUSG00000026365	Cfh	Common up (Quadrant 1)
ENSMUSG00000062929	Cfl2	Common up (Quadrant 1)
ENSMUSG00000032232	Cgnl1	Common up (Quadrant 1)
ENSMUSG00000049422	Chchd10	Common up (Quadrant 1)
ENSMUSG00000070493	Chchd2	Common up (Quadrant 1)
ENSMUSG00000053768	Chchd3	Common up (Quadrant 1)
ENSMUSG00000030086	Chchd6	Common up (Quadrant 1)
ENSMUSG00000014077	Chp1	Common up (Quadrant 1)
ENSMUSG00000060002	Chpt1	Common up (Quadrant 1)
ENSMUSG00000031283	Chrdl1	Common up (Quadrant 1)
ENSMUSG00000027221	Chst1	Common up (Quadrant 1)
ENSMUSG00000034612	Chst11	Common up (Quadrant 1)
ENSMUSG00000037493	Cib2	Common up (Quadrant 1)
ENSMUSG00000030278	Cidec	Common up (Quadrant 1)
ENSMUSG00000037710	Cisd1	Common up (Quadrant 1)
ENSMUSG00000078695	Cisd3	Common up (Quadrant 1)
ENSMUSG00000001270	Ckb	Common up (Quadrant 1)
ENSMUSG00000001739	Cldn15	Common up (Quadrant 1)
ENSMUSG00000041378	Cldn5	Common up (Quadrant 1)
ENSMUSG00000068663	Clec16a	Common up (Quadrant 1)
ENSMUSG00000029238	Clock	Common up (Quadrant 1)
ENSMUSG00000001829	Clpb	Common up (Quadrant 1)
ENSMUSG00000002660	Clpp	Common up (Quadrant 1)
ENSMUSG00000015357	Clpx	Common up (Quadrant 1)
ENSMUSG00000008153	Clstn3	Common up (Quadrant 1)
ENSMUSG00000020741	Cluh	Common up (Quadrant 1)
ENSMUSG00000025545	Clybl	Common up (Quadrant 1)
ENSMUSG00000022235	Cmbl	Common up (Quadrant 1)
ENSMUSG00000042190	Cmklr1	Common up (Quadrant 1)
ENSMUSG00000015759	Cnih1	Common up (Quadrant 1)
ENSMUSG00000064105	Cnnm2	Common up (Quadrant 1)
ENSMUSG00000055022	Cntn1	Common up (Quadrant 1)
ENSMUSG00000026112	Coa5	Common up (Quadrant 1)
ENSMUSG00000001755	Coasy	Common up (Quadrant 1)
ENSMUSG00000031753	Cog4	Common up (Quadrant 1)
ENSMUSG00000028339	Col15a1	Common up (Quadrant 1)
ENSMUSG00000043719	Col6a6	Common up (Quadrant 1)
ENSMUSG00000036103	Colec12	Common up (Quadrant 1)
ENSMUSG00000000326	Comt	Common up (Quadrant 1)
ENSMUSG00000018672	Copz2	Common up (Quadrant 1)
ENSMUSG00000028247	Coq3	Common up (Quadrant 1)
ENSMUSG00000041733	Coq5	Common up (Quadrant 1)
ENSMUSG00000021235	Coq6	Common up (Quadrant 1)
ENSMUSG00000031782	Coq9	Common up (Quadrant 1)
ENSMUSG00000045438	Cox19	Common up (Quadrant 1)
ENSMUSG00000031818	Cox4i1	Common up (Quadrant 1)
ENSMUSG00000041697	Cox6a1	Common up (Quadrant 1)
ENSMUSG00000036751	Cox6b1	Common up (Quadrant 1)
ENSMUSG00000014313	Cox6c	Common up (Quadrant 1)
ENSMUSG00000032330	Cox7a2	Common up (Quadrant 1)
ENSMUSG00000035885	Cox8a	Common up (Quadrant 1)
ENSMUSG00000039782	Cpeb2	Common up (Quadrant 1)
ENSMUSG00000062980	Cped1	Common up (Quadrant 1)
ENSMUSG00000065979	Cpped1	Common up (Quadrant 1)
ENSMUSG00000039007	Cpq	Common up (Quadrant 1)
ENSMUSG00000028607	Cpt2	Common up (Quadrant 1)
ENSMUSG00000036596	Cpz	Common up (Quadrant 1)
ENSMUSG00000026853	Crat	Common up (Quadrant 1)
ENSMUSG00000030284	Creld1	Common up (Quadrant 1)
ENSMUSG00000027357	Crls1	Common up (Quadrant 1)
ENSMUSG00000005683	Cs	Common up (Quadrant 1)
ENSMUSG00000023044	Csad	Common up (Quadrant 1)
ENSMUSG00000032911	Cspg4	Common up (Quadrant 1)
ENSMUSG00000032482	Cspg5	Common up (Quadrant 1)
ENSMUSG00000087382	Ctcflos	Common up (Quadrant 1)
ENSMUSG00000047409	Ctdspl	Common up (Quadrant 1)
ENSMUSG00000028179	Cth	Common up (Quadrant 1)
ENSMUSG00000052928	Ctif	Common up (Quadrant 1)
ENSMUSG00000007891	Ctsd	Common up (Quadrant 1)
ENSMUSG00000024646	Cyb5a	Common up (Quadrant 1)
ENSMUSG00000031924	Cyb5b	Common up (Quadrant 1)
ENSMUSG00000057778	Cyb5d2	Common up (Quadrant 1)
ENSMUSG00000018042	Cyb5r3	Common up (Quadrant 1)
ENSMUSG00000027015	Cybrd1	Common up (Quadrant 1)
ENSMUSG00000022551	Cyc1	Common up (Quadrant 1)
ENSMUSG00000063694	Cycs	Common up (Quadrant 1)
ENSMUSG00000032315	Cyp1a1	Common up (Quadrant 1)
ENSMUSG00000025479	Cyp2e1	Common up (Quadrant 1)
ENSMUSG00000052914	Cyp2j6	Common up (Quadrant 1)
ENSMUSG00000040703	Cyp2s1	Common up (Quadrant 1)
ENSMUSG00000091586	Cyp4f17	Common up (Quadrant 1)
ENSMUSG00000001467	Cyp51	Common up (Quadrant 1)
ENSMUSG00000062563	Cys1	Common up (Quadrant 1)
ENSMUSG00000041134	Cyyr1	Common up (Quadrant 1)
ENSMUSG00000073609	D2hgdh	Common up (Quadrant 1)
ENSMUSG00000029190	D5Ertd579e	Common up (Quadrant 1)
ENSMUSG00000026385	Dbi	Common up (Quadrant 1)
ENSMUSG00000000340	Dbt	Common up (Quadrant 1)
ENSMUSG00000035107	Dcbld2	Common up (Quadrant 1)
ENSMUSG00000051674	Dcun1d4	Common up (Quadrant 1)
ENSMUSG00000061313	Ddhd2	Common up (Quadrant 1)
ENSMUSG00000063428	Ddo	Common up (Quadrant 1)
ENSMUSG00000028223	Decr1	Common up (Quadrant 1)
ENSMUSG00000022365	Derl1	Common up (Quadrant 1)
ENSMUSG00000022555	Dgat1	Common up (Quadrant 1)
ENSMUSG00000030747	Dgat2	Common up (Quadrant 1)
ENSMUSG00000011382	Dhdh	Common up (Quadrant 1)
ENSMUSG00000066026	Dhrs3	Common up (Quadrant 1)
ENSMUSG00000021094	Dhrs7	Common up (Quadrant 1)
ENSMUSG00000042569	Dhrs7b	Common up (Quadrant 1)
ENSMUSG00000030986	Dhx32	Common up (Quadrant 1)
ENSMUSG00000000168	Dlat	Common up (Quadrant 1)
ENSMUSG00000031523	Dlc1	Common up (Quadrant 1)
ENSMUSG00000020664	Dld	Common up (Quadrant 1)
ENSMUSG00000004789	Dlst	Common up (Quadrant 1)
ENSMUSG00000045103	Dmd	Common up (Quadrant 1)
ENSMUSG00000030409	Dmpk	Common up (Quadrant 1)
ENSMUSG00000048138	Dmrt2	Common up (Quadrant 1)
ENSMUSG00000041268	Dmxl2	Common up (Quadrant 1)
ENSMUSG00000027309	Dnaaf9	Common up (Quadrant 1)
ENSMUSG00000022262	Dnah5	Common up (Quadrant 1)
ENSMUSG00000004069	Dnaja3	Common up (Quadrant 1)
ENSMUSG00000074212	Dnajb14	Common up (Quadrant 1)
ENSMUSG00000022013	Dnajc15	Common up (Quadrant 1)
ENSMUSG00000039763	Dnajc28	Common up (Quadrant 1)
ENSMUSG00000075419	Dolk	Common up (Quadrant 1)
ENSMUSG00000026856	Dolpp1	Common up (Quadrant 1)
ENSMUSG00000033308	Dpyd	Common up (Quadrant 1)
ENSMUSG00000020057	Dram1	Common up (Quadrant 1)
ENSMUSG00000004947	Dtx2	Common up (Quadrant 1)
ENSMUSG00000024190	Dusp1	Common up (Quadrant 1)
ENSMUSG00000003518	Dusp3	Common up (Quadrant 1)
ENSMUSG00000047459	Dynlrb1	Common up (Quadrant 1)
ENSMUSG00000053117	E330013P04Rik	Common up (Quadrant 1)
ENSMUSG00000022053	Ebf2	Common up (Quadrant 1)
ENSMUSG00000010476	Ebf3	Common up (Quadrant 1)
ENSMUSG00000053898	Ech1	Common up (Quadrant 1)
ENSMUSG00000019883	Echdc1	Common up (Quadrant 1)
ENSMUSG00000039063	Echdc3	Common up (Quadrant 1)
ENSMUSG00000025465	Echs1	Common up (Quadrant 1)
ENSMUSG00000024132	Eci1	Common up (Quadrant 1)
ENSMUSG00000021416	Eci3	Common up (Quadrant 1)
ENSMUSG00000028108	Ecm1	Common up (Quadrant 1)
ENSMUSG00000022122	Ednrb	Common up (Quadrant 1)
ENSMUSG00000036611	Eepd1	Common up (Quadrant 1)
ENSMUSG00000020467	Efemp1	Common up (Quadrant 1)
ENSMUSG00000031987	Egln1	Common up (Quadrant 1)
ENSMUSG00000074364	Ehd2	Common up (Quadrant 1)
ENSMUSG00000022853	Ehhadh	Common up (Quadrant 1)
ENSMUSG00000057561	Eif1a	Common up (Quadrant 1)
ENSMUSG00000093661	Eif4e3	Common up (Quadrant 1)
ENSMUSG00000031490	Eif4ebp1	Common up (Quadrant 1)
ENSMUSG00000045983	Eif4g1	Common up (Quadrant 1)
ENSMUSG00000035151	Elmod2	Common up (Quadrant 1)
ENSMUSG00000032349	Elovl5	Common up (Quadrant 1)
ENSMUSG00000041220	Elovl6	Common up (Quadrant 1)
ENSMUSG00000047260	Emc6	Common up (Quadrant 1)
ENSMUSG00000055943	Emc7	Common up (Quadrant 1)
ENSMUSG00000043969	Emx2	Common up (Quadrant 1)
ENSMUSG00000087095	Emx2os	Common up (Quadrant 1)
ENSMUSG00000063524	Eno1	Common up (Quadrant 1)
ENSMUSG00000028024	Enpep	Common up (Quadrant 1)
ENSMUSG00000023960	Enpp5	Common up (Quadrant 1)
ENSMUSG00000021236	Entpd5	Common up (Quadrant 1)
ENSMUSG00000033068	Entpd6	Common up (Quadrant 1)
ENSMUSG00000024140	Epas1	Common up (Quadrant 1)
ENSMUSG00000019978	Epb41l2	Common up (Quadrant 1)
ENSMUSG00000022040	Ephx2	Common up (Quadrant 1)
ENSMUSG00000001576	Ergic1	Common up (Quadrant 1)
ENSMUSG00000046324	Ermp1	Common up (Quadrant 1)
ENSMUSG00000001946	Esam	Common up (Quadrant 1)
ENSMUSG00000042379	Esm1	Common up (Quadrant 1)
ENSMUSG00000019768	Esr1	Common up (Quadrant 1)
ENSMUSG00000021171	Esyt2	Common up (Quadrant 1)
ENSMUSG00000032314	Etfa	Common up (Quadrant 1)
ENSMUSG00000039958	Etfbkmt	Common up (Quadrant 1)
ENSMUSG00000027809	Etfdh	Common up (Quadrant 1)
ENSMUSG00000040370	Etfrf1	Common up (Quadrant 1)
ENSMUSG00000021978	Extl3	Common up (Quadrant 1)
ENSMUSG00000039109	F13a1	Common up (Quadrant 1)
ENSMUSG00000062515	Fabp4	Common up (Quadrant 1)
ENSMUSG00000027533	Fabp5	Common up (Quadrant 1)
ENSMUSG00000024664	Fads3	Common up (Quadrant 1)
ENSMUSG00000030630	Fah	Common up (Quadrant 1)
ENSMUSG00000036136	Fam110c	Common up (Quadrant 1)
ENSMUSG00000038174	Fam126b	Common up (Quadrant 1)
ENSMUSG00000071604	Fam189a2	Common up (Quadrant 1)
ENSMUSG00000034858	Fam214a	Common up (Quadrant 1)
ENSMUSG00000025153	Fasn	Common up (Quadrant 1)
ENSMUSG00000006369	Fbln1	Common up (Quadrant 1)
ENSMUSG00000064080	Fbln2	Common up (Quadrant 1)
ENSMUSG00000021186	Fbln5	Common up (Quadrant 1)
ENSMUSG00000050503	Fbxl22	Common up (Quadrant 1)
ENSMUSG00000040410	Fbxl4	Common up (Quadrant 1)
ENSMUSG00000035764	Fbxo45	Common up (Quadrant 1)
ENSMUSG00000038206	Fbxo8	Common up (Quadrant 1)
ENSMUSG00000026938	Fcna	Common up (Quadrant 1)
ENSMUSG00000089665	Fcor	Common up (Quadrant 1)
ENSMUSG00000021273	Fdft1	Common up (Quadrant 1)
ENSMUSG00000024588	Fech	Common up (Quadrant 1)
ENSMUSG00000037712	Fermt2	Common up (Quadrant 1)
ENSMUSG00000054200	Ffar4	Common up (Quadrant 1)
ENSMUSG00000036585	Fgf1	Common up (Quadrant 1)
ENSMUSG00000021732	Fgf10	Common up (Quadrant 1)
ENSMUSG00000037225	Fgf2	Common up (Quadrant 1)
ENSMUSG00000021974	Fgf9	Common up (Quadrant 1)
ENSMUSG00000008090	Fgfrl1	Common up (Quadrant 1)
ENSMUSG00000026526	Fh1	Common up (Quadrant 1)
ENSMUSG00000075324	Fign	Common up (Quadrant 1)
ENSMUSG00000048486	Fitm2	Common up (Quadrant 1)
ENSMUSG00000032966	Fkbp1a	Common up (Quadrant 1)
ENSMUSG00000047528	Flacc1	Common up (Quadrant 1)
ENSMUSG00000047787	Flrt1	Common up (Quadrant 1)
ENSMUSG00000047414	Flrt2	Common up (Quadrant 1)
ENSMUSG00000040181	Fmo1	Common up (Quadrant 1)
ENSMUSG00000028088	Fmo5	Common up (Quadrant 1)
ENSMUSG00000025175	Fn3k	Common up (Quadrant 1)
ENSMUSG00000015994	Fnta	Common up (Quadrant 1)
ENSMUSG00000046714	Foxc2	Common up (Quadrant 1)
ENSMUSG00000039048	Foxred1	Common up (Quadrant 1)
ENSMUSG00000056602	Fry	Common up (Quadrant 1)
ENSMUSG00000024661	Fth1	Common up (Quadrant 1)
ENSMUSG00000050708	Ftl1	Common up (Quadrant 1)
ENSMUSG00000036570	Fxyd1	Common up (Quadrant 1)
ENSMUSG00000009633	G0s2	Common up (Quadrant 1)
ENSMUSG00000031400	G6pdx	Common up (Quadrant 1)
ENSMUSG00000031343	Gabra3	Common up (Quadrant 1)
ENSMUSG00000029212	Gabrb1	Common up (Quadrant 1)
ENSMUSG00000031344	Gabrq	Common up (Quadrant 1)
ENSMUSG00000035473	Galm	Common up (Quadrant 1)
ENSMUSG00000089704	Galnt2	Common up (Quadrant 1)
ENSMUSG00000062646	Ganc	Common up (Quadrant 1)
ENSMUSG00000052957	Gas1	Common up (Quadrant 1)
ENSMUSG00000015627	Gata5	Common up (Quadrant 1)
ENSMUSG00000005836	Gata6	Common up (Quadrant 1)
ENSMUSG00000097222	Gata6os	Common up (Quadrant 1)
ENSMUSG00000053329	Gatd3a	Common up (Quadrant 1)
ENSMUSG00000022707	Gbe1	Common up (Quadrant 1)
ENSMUSG00000034424	Gcsh	Common up (Quadrant 1)
ENSMUSG00000058624	Gda	Common up (Quadrant 1)
ENSMUSG00000033917	Gde1	Common up (Quadrant 1)
ENSMUSG00000027774	Gfm1	Common up (Quadrant 1)
ENSMUSG00000053460	Ggcx	Common up (Quadrant 1)
ENSMUSG00000041028	Ghitm	Common up (Quadrant 1)
ENSMUSG00000055737	Ghr	Common up (Quadrant 1)
ENSMUSG00000040006	Ginm1	Common up (Quadrant 1)
ENSMUSG00000050953	Gja1	Common up (Quadrant 1)
ENSMUSG00000057123	Gja5	Common up (Quadrant 1)
ENSMUSG00000042357	Gjb5	Common up (Quadrant 1)
ENSMUSG00000036395	Glb1l2	Common up (Quadrant 1)
ENSMUSG00000031068	Glrx3	Common up (Quadrant 1)
ENSMUSG00000021794	Glud1	Common up (Quadrant 1)
ENSMUSG00000067719	Gm10221	Common up (Quadrant 1)
ENSMUSG00000067736	Gm10222	Common up (Quadrant 1)
ENSMUSG00000068706	Gm10250	Common up (Quadrant 1)
ENSMUSG00000072769	Gm10419	Common up (Quadrant 1)
ENSMUSG00000097617	Gm10687	Common up (Quadrant 1)
ENSMUSG00000100862	Gm10925	Common up (Quadrant 1)
ENSMUSG00000083563	Gm13340	Common up (Quadrant 1)
ENSMUSG00000084897	Gm14226	Common up (Quadrant 1)
ENSMUSG00000094786	Gm14403	Common up (Quadrant 1)
ENSMUSG00000086679	Gm15551	Common up (Quadrant 1)
ENSMUSG00000107810	Gm18609	Common up (Quadrant 1)
ENSMUSG00000116903	Gm19522	Common up (Quadrant 1)
ENSMUSG00000106874	Gm20186	Common up (Quadrant 1)
ENSMUSG00000097730	Gm26588	Common up (Quadrant 1)
ENSMUSG00000100131	Gm28439	Common up (Quadrant 1)
ENSMUSG00000102070	Gm28661	Common up (Quadrant 1)
ENSMUSG00000106709	Gm30270	Common up (Quadrant 1)
ENSMUSG00000105245	Gm31305	Common up (Quadrant 1)
ENSMUSG00000114538	Gm31517	Common up (Quadrant 1)
ENSMUSG00000106871	Gm3289	Common up (Quadrant 1)
ENSMUSG00000111763	Gm34973	Common up (Quadrant 1)
ENSMUSG00000117263	Gm35290	Common up (Quadrant 1)
ENSMUSG00000113909	Gm36377	Common up (Quadrant 1)
ENSMUSG00000117664	Gm36860	Common up (Quadrant 1)
ENSMUSG00000105867	Gm42517	Common up (Quadrant 1)
ENSMUSG00000106073	Gm42892	Common up (Quadrant 1)
ENSMUSG00000107029	Gm43123	Common up (Quadrant 1)
ENSMUSG00000107881	Gm44250	Common up (Quadrant 1)
ENSMUSG00000107066	Gm4482	Common up (Quadrant 1)
ENSMUSG00000089783	Gm454	Common up (Quadrant 1)
ENSMUSG00000109674	Gm45470	Common up (Quadrant 1)
ENSMUSG00000110344	Gm45716	Common up (Quadrant 1)
ENSMUSG00000111840	Gm48832	Common up (Quadrant 1)
ENSMUSG00000111942	Gm5182	Common up (Quadrant 1)
ENSMUSG00000072624	Gm5460	Common up (Quadrant 1)
ENSMUSG00000042293	Gm5617	Common up (Quadrant 1)
ENSMUSG00000103922	Gm6123	Common up (Quadrant 1)
ENSMUSG00000097440	Gm6277	Common up (Quadrant 1)
ENSMUSG00000091561	Gm6665	Common up (Quadrant 1)
ENSMUSG00000057614	Gnai1	Common up (Quadrant 1)
ENSMUSG00000032192	Gnb5	Common up (Quadrant 1)
ENSMUSG00000031985	Gnpat	Common up (Quadrant 1)
ENSMUSG00000024978	Gpam	Common up (Quadrant 1)
ENSMUSG00000029314	Gpat3	Common up (Quadrant 1)
ENSMUSG00000031119	Gpc4	Common up (Quadrant 1)
ENSMUSG00000023019	Gpd1	Common up (Quadrant 1)
ENSMUSG00000026827	Gpd2	Common up (Quadrant 1)
ENSMUSG00000022579	Gpihbp1	Common up (Quadrant 1)
ENSMUSG00000031517	Gpm6a	Common up (Quadrant 1)
ENSMUSG00000044317	Gpr4	Common up (Quadrant 1)
ENSMUSG00000022546	Gpt	Common up (Quadrant 1)
ENSMUSG00000063856	Gpx1	Common up (Quadrant 1)
ENSMUSG00000075706	Gpx4	Common up (Quadrant 1)
ENSMUSG00000110841	Gpx4-ps2	Common up (Quadrant 1)
ENSMUSG00000020176	Grb10	Common up (Quadrant 1)
ENSMUSG00000042942	Greb1l	Common up (Quadrant 1)
ENSMUSG00000030209	Grin2b	Common up (Quadrant 1)
ENSMUSG00000022564	Grina	Common up (Quadrant 1)
ENSMUSG00000044221	Grsf1	Common up (Quadrant 1)
ENSMUSG00000026879	Gsn	Common up (Quadrant 1)
ENSMUSG00000025934	Gsta3	Common up (Quadrant 1)
ENSMUSG00000032348	Gsta4	Common up (Quadrant 1)
ENSMUSG00000029864	Gstk1	Common up (Quadrant 1)
ENSMUSG00000058135	Gstm1	Common up (Quadrant 1)
ENSMUSG00000040562	Gstm2	Common up (Quadrant 1)
ENSMUSG00000027890	Gstm4	Common up (Quadrant 1)
ENSMUSG00000004032	Gstm5	Common up (Quadrant 1)
ENSMUSG00000068762	Gstm6	Common up (Quadrant 1)
ENSMUSG00000021033	Gstz1	Common up (Quadrant 1)
ENSMUSG00000033416	Gucd1	Common up (Quadrant 1)
ENSMUSG00000033910	Gucy1a1	Common up (Quadrant 1)
ENSMUSG00000056870	Gulp1	Common up (Quadrant 1)
ENSMUSG00000019528	Gyg	Common up (Quadrant 1)
ENSMUSG00000003865	Gys1	Common up (Quadrant 1)
ENSMUSG00000027439	Gzf1	Common up (Quadrant 1)
ENSMUSG00000036181	H1f2	Common up (Quadrant 1)
ENSMUSG00000018102	H2bc4	Common up (Quadrant 1)
ENSMUSG00000047246	H2bc6	Common up (Quadrant 1)
ENSMUSG00000060981	H4c8	Common up (Quadrant 1)
ENSMUSG00000028980	H6pd	Common up (Quadrant 1)
ENSMUSG00000063275	Hacd1	Common up (Quadrant 1)
ENSMUSG00000035376	Hacd2	Common up (Quadrant 1)
ENSMUSG00000027984	Hadh	Common up (Quadrant 1)
ENSMUSG00000025745	Hadha	Common up (Quadrant 1)
ENSMUSG00000059447	Hadhb	Common up (Quadrant 1)
ENSMUSG00000063684	Hadhb-ps	Common up (Quadrant 1)
ENSMUSG00000069919	Hba-a1	Common up (Quadrant 1)
ENSMUSG00000069917	Hba-a2	Common up (Quadrant 1)
ENSMUSG00000052305	Hbb-bs	Common up (Quadrant 1)
ENSMUSG00000073940	Hbb-bt	Common up (Quadrant 1)
ENSMUSG00000049241	Hcar1	Common up (Quadrant 1)
ENSMUSG00000045502	Hcar2	Common up (Quadrant 1)
ENSMUSG00000034088	Hdlbp	Common up (Quadrant 1)
ENSMUSG00000042770	Hebp1	Common up (Quadrant 1)
ENSMUSG00000031209	Heph	Common up (Quadrant 1)
ENSMUSG00000006611	Hfe	Common up (Quadrant 1)
ENSMUSG00000037260	Hgsnat	Common up (Quadrant 1)
ENSMUSG00000029776	Hibadh	Common up (Quadrant 1)
ENSMUSG00000041426	Hibch	Common up (Quadrant 1)
ENSMUSG00000061436	Hipk2	Common up (Quadrant 1)
ENSMUSG00000032126	Hmbs	Common up (Quadrant 1)
ENSMUSG00000093930	Hmgcs1	Common up (Quadrant 1)
ENSMUSG00000026986	Hnmt	Common up (Quadrant 1)
ENSMUSG00000000938	Hoxa10	Common up (Quadrant 1)
ENSMUSG00000038203	Hoxa13	Common up (Quadrant 1)
ENSMUSG00000079560	Hoxa3	Common up (Quadrant 1)
ENSMUSG00000038253	Hoxa5	Common up (Quadrant 1)
ENSMUSG00000038236	Hoxa7	Common up (Quadrant 1)
ENSMUSG00000022485	Hoxc5	Common up (Quadrant 1)
ENSMUSG00000001661	Hoxc6	Common up (Quadrant 1)
ENSMUSG00000001657	Hoxc8	Common up (Quadrant 1)
ENSMUSG00000042499	Hoxd11	Common up (Quadrant 1)
ENSMUSG00000052371	Hoxd3os1	Common up (Quadrant 1)
ENSMUSG00000101174	Hoxd4	Common up (Quadrant 1)
ENSMUSG00000027102	Hoxd8	Common up (Quadrant 1)
ENSMUSG00000031722	Hp	Common up (Quadrant 1)
ENSMUSG00000071001	Hrct1	Common up (Quadrant 1)
ENSMUSG00000027195	Hsd17b12	Common up (Quadrant 1)
ENSMUSG00000024507	Hsd17b4	Common up (Quadrant 1)
ENSMUSG00000025092	Hspa12a	Common up (Quadrant 1)
ENSMUSG00000024359	Hspa9	Common up (Quadrant 1)
ENSMUSG00000004951	Hspb1	Common up (Quadrant 1)
ENSMUSG00000041548	Hspb8	Common up (Quadrant 1)
ENSMUSG00000025980	Hspd1	Common up (Quadrant 1)
ENSMUSG00000081189	Hspd1-ps4	Common up (Quadrant 1)
ENSMUSG00000029096	Htra3	Common up (Quadrant 1)
ENSMUSG00000035878	Hykk	Common up (Quadrant 1)
ENSMUSG00000062054	Iah1	Common up (Quadrant 1)
ENSMUSG00000026618	Iars2	Common up (Quadrant 1)
ENSMUSG00000042745	Id1	Common up (Quadrant 1)
ENSMUSG00000007872	Id3	Common up (Quadrant 1)
ENSMUSG00000025950	Idh1	Common up (Quadrant 1)
ENSMUSG00000032279	Idh3a	Common up (Quadrant 1)
ENSMUSG00000027406	Idh3b	Common up (Quadrant 1)
ENSMUSG00000002010	Idh3g	Common up (Quadrant 1)
ENSMUSG00000064215	Ifi27	Common up (Quadrant 1)
ENSMUSG00000001627	Ifrd1	Common up (Quadrant 1)
ENSMUSG00000020053	Igf1	Common up (Quadrant 1)
ENSMUSG00000046070	Igfals	Common up (Quadrant 1)
ENSMUSG00000023046	Igfbp6	Common up (Quadrant 1)
ENSMUSG00000037157	Il22ra1	Common up (Quadrant 1)
ENSMUSG00000050377	Il31ra	Common up (Quadrant 1)
ENSMUSG00000031750	Il34	Common up (Quadrant 1)
ENSMUSG00000040612	Ildr2	Common up (Quadrant 1)
ENSMUSG00000056899	Immp2l	Common up (Quadrant 1)
ENSMUSG00000052337	Immt	Common up (Quadrant 1)
ENSMUSG00000024423	Impact	Common up (Quadrant 1)
ENSMUSG00000025477	Inpp5a	Common up (Quadrant 1)
ENSMUSG00000045294	Insig1	Common up (Quadrant 1)
ENSMUSG00000041879	Ipo9	Common up (Quadrant 1)
ENSMUSG00000005611	Irag1	Common up (Quadrant 1)
ENSMUSG00000032251	Irak1bp1	Common up (Quadrant 1)
ENSMUSG00000047182	Irs3	Common up (Quadrant 1)
ENSMUSG00000044792	Isca1	Common up (Quadrant 1)
ENSMUSG00000025825	Iscu	Common up (Quadrant 1)
ENSMUSG00000024601	Isoc1	Common up (Quadrant 1)
ENSMUSG00000086784	Isoc2a	Common up (Quadrant 1)
ENSMUSG00000042284	Itga1	Common up (Quadrant 1)
ENSMUSG00000000555	Itga5	Common up (Quadrant 1)
ENSMUSG00000025348	Itga7	Common up (Quadrant 1)
ENSMUSG00000062352	Itgb1bp1	Common up (Quadrant 1)
ENSMUSG00000021922	Itih4	Common up (Quadrant 1)
ENSMUSG00000027332	Ivd	Common up (Quadrant 1)
ENSMUSG00000063568	Jazf1	Common up (Quadrant 1)
ENSMUSG00000033960	Jcad	Common up (Quadrant 1)
ENSMUSG00000025736	Jmjd8	Common up (Quadrant 1)
ENSMUSG00000032702	Kank1	Common up (Quadrant 1)
ENSMUSG00000027827	Kcnab1	Common up (Quadrant 1)
ENSMUSG00000050556	Kcnb1	Common up (Quadrant 1)
ENSMUSG00000040896	Kcnd3	Common up (Quadrant 1)
ENSMUSG00000062609	Kcnj15	Common up (Quadrant 1)
ENSMUSG00000049265	Kcnk3	Common up (Quadrant 1)
ENSMUSG00000043673	Kcns3	Common up (Quadrant 1)
ENSMUSG00000059022	Kcp	Common up (Quadrant 1)
ENSMUSG00000041633	Kctd12b	Common up (Quadrant 1)
ENSMUSG00000016940	Kctd2	Common up (Quadrant 1)
ENSMUSG00000044952	Kctd21	Common up (Quadrant 1)
ENSMUSG00000062960	Kdr	Common up (Quadrant 1)
ENSMUSG00000009905	Kdsr	Common up (Quadrant 1)
ENSMUSG00000063077	Kif1b	Common up (Quadrant 1)
ENSMUSG00000029195	Klb	Common up (Quadrant 1)
ENSMUSG00000078234	Klhdc7a	Common up (Quadrant 1)
ENSMUSG00000036782	Klhl13	Common up (Quadrant 1)
ENSMUSG00000031605	Klhl2	Common up (Quadrant 1)
ENSMUSG00000028986	Klhl7	Common up (Quadrant 1)
ENSMUSG00000049327	Kmt5a	Common up (Quadrant 1)
ENSMUSG00000060459	Kng2	Common up (Quadrant 1)
ENSMUSG00000003731	Kpna6	Common up (Quadrant 1)
ENSMUSG00000040213	Kyat3	Common up (Quadrant 1)
ENSMUSG00000025937	Lactb2	Common up (Quadrant 1)
ENSMUSG00000019846	Lama4	Common up (Quadrant 1)
ENSMUSG00000031447	Lamp1	Common up (Quadrant 1)
ENSMUSG00000030842	Lamtor1	Common up (Quadrant 1)
ENSMUSG00000020585	Laptm4a	Common up (Quadrant 1)
ENSMUSG00000022257	Laptm4b	Common up (Quadrant 1)
ENSMUSG00000025762	Larp1b	Common up (Quadrant 1)
ENSMUSG00000016024	Lbp	Common up (Quadrant 1)
ENSMUSG00000032401	Lctl	Common up (Quadrant 1)
ENSMUSG00000037669	Ldah	Common up (Quadrant 1)
ENSMUSG00000063229	Ldha	Common up (Quadrant 1)
ENSMUSG00000031958	Ldhd	Common up (Quadrant 1)
ENSMUSG00000005299	Letm1	Common up (Quadrant 1)
ENSMUSG00000037353	Letmd1	Common up (Quadrant 1)
ENSMUSG00000068220	Lgals1	Common up (Quadrant 1)
ENSMUSG00000024972	Lgals12	Common up (Quadrant 1)
ENSMUSG00000039252	Lgi2	Common up (Quadrant 1)
ENSMUSG00000030946	Lhpp	Common up (Quadrant 1)
ENSMUSG00000029199	Lias	Common up (Quadrant 1)
ENSMUSG00000024395	Lims2	Common up (Quadrant 1)
ENSMUSG00000003123	Lipe	Common up (Quadrant 1)
ENSMUSG00000021484	Lman2	Common up (Quadrant 1)
ENSMUSG00000001143	Lman2l	Common up (Quadrant 1)
ENSMUSG00000110613	Lncbate1	Common up (Quadrant 1)
ENSMUSG00000041168	Lonp1	Common up (Quadrant 1)
ENSMUSG00000047866	Lonp2	Common up (Quadrant 1)
ENSMUSG00000004270	Lpcat3	Common up (Quadrant 1)
ENSMUSG00000020593	Lpin1	Common up (Quadrant 1)
ENSMUSG00000015568	Lpl	Common up (Quadrant 1)
ENSMUSG00000063458	Lrmda	Common up (Quadrant 1)
ENSMUSG00000027070	Lrp2	Common up (Quadrant 1)
ENSMUSG00000029103	Lrpap1	Common up (Quadrant 1)
ENSMUSG00000015980	Lrrc27	Common up (Quadrant 1)
ENSMUSG00000034158	Lrrc58	Common up (Quadrant 1)
ENSMUSG00000021090	Lrrc9	Common up (Quadrant 1)
ENSMUSG00000043110	Lrrn4	Common up (Quadrant 1)
ENSMUSG00000033105	Lss	Common up (Quadrant 1)
ENSMUSG00000040488	Ltbp4	Common up (Quadrant 1)
ENSMUSG00000020377	Ltc4s	Common up (Quadrant 1)
ENSMUSG00000024481	Lvrn	Common up (Quadrant 1)
ENSMUSG00000039246	Lyplal1	Common up (Quadrant 1)
ENSMUSG00000025151	Maged1	Common up (Quadrant 1)
ENSMUSG00000038886	Man2a2	Common up (Quadrant 1)
ENSMUSG00000040147	Maob	Common up (Quadrant 1)
ENSMUSG00000025610	Map3k7cl	Common up (Quadrant 1)
ENSMUSG00000055407	Map6	Common up (Quadrant 1)
ENSMUSG00000024558	Mapk4	Common up (Quadrant 1)
ENSMUSG00000042688	Mapk6	Common up (Quadrant 1)
ENSMUSG00000079557	Marchf2	Common up (Quadrant 1)
ENSMUSG00000022324	Matn2	Common up (Quadrant 1)
ENSMUSG00000037523	Mavs	Common up (Quadrant 1)
ENSMUSG00000032135	Mcam	Common up (Quadrant 1)
ENSMUSG00000027709	Mccc1	Common up (Quadrant 1)
ENSMUSG00000021646	Mccc2	Common up (Quadrant 1)
ENSMUSG00000024150	Mcfd2	Common up (Quadrant 1)
ENSMUSG00000025732	Mcrip2	Common up (Quadrant 1)
ENSMUSG00000021371	Mcur1	Common up (Quadrant 1)
ENSMUSG00000090667	Mdfic2	Common up (Quadrant 1)
ENSMUSG00000020321	Mdh1	Common up (Quadrant 1)
ENSMUSG00000019179	Mdh2	Common up (Quadrant 1)
ENSMUSG00000032418	Me1	Common up (Quadrant 1)
ENSMUSG00000027684	Mecom	Common up (Quadrant 1)
ENSMUSG00000028910	Mecr	Common up (Quadrant 1)
ENSMUSG00000056476	Med12l	Common up (Quadrant 1)
ENSMUSG00000057751	Megf6	Common up (Quadrant 1)
ENSMUSG00000039270	Megf9	Common up (Quadrant 1)
ENSMUSG00000020160	Meis1	Common up (Quadrant 1)
ENSMUSG00000027210	Meis2	Common up (Quadrant 1)
ENSMUSG00000045555	Mettl24	Common up (Quadrant 1)
ENSMUSG00000054619	Mettl7a1	Common up (Quadrant 1)
ENSMUSG00000025347	Mettl7b	Common up (Quadrant 1)
ENSMUSG00000029020	Mfn2	Common up (Quadrant 1)
ENSMUSG00000018169	Mfng	Common up (Quadrant 1)
ENSMUSG00000025759	Mfsd8	Common up (Quadrant 1)
ENSMUSG00000040950	Mgl2	Common up (Quadrant 1)
ENSMUSG00000033174	Mgll	Common up (Quadrant 1)
ENSMUSG00000030218	Mgp	Common up (Quadrant 1)
ENSMUSG00000008540	Mgst1	Common up (Quadrant 1)
ENSMUSG00000074604	Mgst2	Common up (Quadrant 1)
ENSMUSG00000097767	Miat	Common up (Quadrant 1)
ENSMUSG00000051586	Mical3	Common up (Quadrant 1)
ENSMUSG00000008035	Mid1ip1	Common up (Quadrant 1)
ENSMUSG00000026858	Miga2	Common up (Quadrant 1)
ENSMUSG00000050875	Minar2	Common up (Quadrant 1)
ENSMUSG00000021993	Mipep	Common up (Quadrant 1)
ENSMUSG00000098882	Mir6392	Common up (Quadrant 1)
ENSMUSG00000027274	Mkks	Common up (Quadrant 1)
ENSMUSG00000020190	Mknk2	Common up (Quadrant 1)
ENSMUSG00000005373	Mlxipl	Common up (Quadrant 1)
ENSMUSG00000074064	Mlycd	Common up (Quadrant 1)
ENSMUSG00000029575	Mmab	Common up (Quadrant 1)
ENSMUSG00000028690	Mmachc	Common up (Quadrant 1)
ENSMUSG00000003948	Mmd	Common up (Quadrant 1)
ENSMUSG00000061273	Mmgt1	Common up (Quadrant 1)
ENSMUSG00000029436	Mmp17	Common up (Quadrant 1)
ENSMUSG00000025355	Mmp19	Common up (Quadrant 1)
ENSMUSG00000020682	Mmp28	Common up (Quadrant 1)
ENSMUSG00000023921	Mmut	Common up (Quadrant 1)
ENSMUSG00000015536	Mocs2	Common up (Quadrant 1)
ENSMUSG00000012187	Mogat1	Common up (Quadrant 1)
ENSMUSG00000052396	Mogat2	Common up (Quadrant 1)
ENSMUSG00000031434	Morc4	Common up (Quadrant 1)
ENSMUSG00000023074	Mospd1	Common up (Quadrant 1)
ENSMUSG00000023861	Mpc1	Common up (Quadrant 1)
ENSMUSG00000091498	Mpc1-ps	Common up (Quadrant 1)
ENSMUSG00000026568	Mpc2	Common up (Quadrant 1)
ENSMUSG00000028402	Mpdz	Common up (Quadrant 1)
ENSMUSG00000031402	Mpp1	Common up (Quadrant 1)
ENSMUSG00000107283	Mpv17	Common up (Quadrant 1)
ENSMUSG00000039956	Mrap	Common up (Quadrant 1)
ENSMUSG00000030879	Mrpl17	Common up (Quadrant 1)
ENSMUSG00000026087	Mrpl30	Common up (Quadrant 1)
ENSMUSG00000062981	Mrpl42	Common up (Quadrant 1)
ENSMUSG00000007338	Mrpl49	Common up (Quadrant 1)
ENSMUSG00000028861	Mrps15	Common up (Quadrant 1)
ENSMUSG00000035772	Mrps2	Common up (Quadrant 1)
ENSMUSG00000039680	Mrps6	Common up (Quadrant 1)
ENSMUSG00000046756	Mrps7	Common up (Quadrant 1)
ENSMUSG00000026887	Mrrf	Common up (Quadrant 1)
ENSMUSG00000031604	Msmo1	Common up (Quadrant 1)
ENSMUSG00000054733	Msra	Common up (Quadrant 1)
ENSMUSG00000075705	Msrb1	Common up (Quadrant 1)
ENSMUSG00000051236	Msrb3	Common up (Quadrant 1)
ENSMUSG00000032584	Mst1r	Common up (Quadrant 1)
ENSMUSG00000026621	Mtarc1	Common up (Quadrant 1)
ENSMUSG00000073481	Mtarc2	Common up (Quadrant 1)
ENSMUSG00000027282	Mtch2	Common up (Quadrant 1)
ENSMUSG00000064351	mt-Co1	Common up (Quadrant 1)
ENSMUSG00000064354	mt-Co2	Common up (Quadrant 1)
ENSMUSG00000064358	mt-Co3	Common up (Quadrant 1)
ENSMUSG00000064370	mt-Cytb	Common up (Quadrant 1)
ENSMUSG00000064341	mt-Nd1	Common up (Quadrant 1)
ENSMUSG00000064345	mt-Nd2	Common up (Quadrant 1)
ENSMUSG00000064360	mt-Nd3	Common up (Quadrant 1)
ENSMUSG00000064363	mt-Nd4	Common up (Quadrant 1)
ENSMUSG00000064367	mt-Nd5	Common up (Quadrant 1)
ENSMUSG00000064368	mt-Nd6	Common up (Quadrant 1)
ENSMUSG00000064372	mt-Tp	Common up (Quadrant 1)
ENSMUSG00000045636	Mtus1	Common up (Quadrant 1)
ENSMUSG00000109564	Muc16	Common up (Quadrant 1)
ENSMUSG00000066154	Mup3	Common up (Quadrant 1)
ENSMUSG00000068566	Myadm	Common up (Quadrant 1)
ENSMUSG00000022836	Mylk	Common up (Quadrant 1)
ENSMUSG00000035441	Myo1d	Common up (Quadrant 1)
ENSMUSG00000020542	Myocd	Common up (Quadrant 1)
ENSMUSG00000036098	Myrf	Common up (Quadrant 1)
ENSMUSG00000043943	Naalad2	Common up (Quadrant 1)
ENSMUSG00000026107	Nabp1	Common up (Quadrant 1)
ENSMUSG00000026932	Nacc2	Common up (Quadrant 1)
ENSMUSG00000029063	Nadk	Common up (Quadrant 1)
ENSMUSG00000020572	Nampt	Common up (Quadrant 1)
ENSMUSG00000006024	Napa	Common up (Quadrant 1)
ENSMUSG00000044968	Napepld	Common up (Quadrant 1)
ENSMUSG00000048142	Nat8l	Common up (Quadrant 1)
ENSMUSG00000041120	Nbl1	Common up (Quadrant 1)
ENSMUSG00000027002	Nckap1	Common up (Quadrant 1)
ENSMUSG00000056234	Ncoa4	Common up (Quadrant 1)
ENSMUSG00000021908	Ncoa4-ps	Common up (Quadrant 1)
ENSMUSG00000026260	Ndufa10	Common up (Quadrant 1)
ENSMUSG00000029632	Ndufa4	Common up (Quadrant 1)
ENSMUSG00000000399	Ndufa9	Common up (Quadrant 1)
ENSMUSG00000030869	Ndufab1	Common up (Quadrant 1)
ENSMUSG00000091989	Ndufab1-ps	Common up (Quadrant 1)
ENSMUSG00000027305	Ndufaf1	Common up (Quadrant 1)
ENSMUSG00000027673	Ndufb5	Common up (Quadrant 1)
ENSMUSG00000037152	Ndufc1	Common up (Quadrant 1)
ENSMUSG00000025968	Ndufs1	Common up (Quadrant 1)
ENSMUSG00000013593	Ndufs2	Common up (Quadrant 1)
ENSMUSG00000005510	Ndufs3	Common up (Quadrant 1)
ENSMUSG00000020153	Ndufs7	Common up (Quadrant 1)
ENSMUSG00000059734	Ndufs8	Common up (Quadrant 1)
ENSMUSG00000024099	Ndufv2	Common up (Quadrant 1)
ENSMUSG00000032216	Nedd4	Common up (Quadrant 1)
ENSMUSG00000040037	Negr1	Common up (Quadrant 1)
ENSMUSG00000028565	Nfia	Common up (Quadrant 1)
ENSMUSG00000027618	Nfs1	Common up (Quadrant 1)
ENSMUSG00000021032	Ngb	Common up (Quadrant 1)
ENSMUSG00000032606	Nicn1	Common up (Quadrant 1)
ENSMUSG00000005397	Nid1	Common up (Quadrant 1)
ENSMUSG00000021806	Nid2	Common up (Quadrant 1)
ENSMUSG00000027574	Nkain4	Common up (Quadrant 1)
ENSMUSG00000031661	Nkd1	Common up (Quadrant 1)
ENSMUSG00000028430	Nol6	Common up (Quadrant 1)
ENSMUSG00000030835	Nomo1	Common up (Quadrant 1)
ENSMUSG00000020826	Nos2	Common up (Quadrant 1)
ENSMUSG00000028978	Nos3	Common up (Quadrant 1)
ENSMUSG00000015468	Notch4	Common up (Quadrant 1)
ENSMUSG00000021242	Npc2	Common up (Quadrant 1)
ENSMUSG00000028469	Npr2	Common up (Quadrant 1)
ENSMUSG00000022206	Npr3	Common up (Quadrant 1)
ENSMUSG00000002108	Nr1h3	Common up (Quadrant 1)
ENSMUSG00000032311	Nrg4	Common up (Quadrant 1)
ENSMUSG00000048490	Nrip1	Common up (Quadrant 1)
ENSMUSG00000039114	Nrn1	Common up (Quadrant 1)
ENSMUSG00000025810	Nrp1	Common up (Quadrant 1)
ENSMUSG00000024109	Nrxn1	Common up (Quadrant 1)
ENSMUSG00000033768	Nrxn2	Common up (Quadrant 1)
ENSMUSG00000031349	Nsdhl	Common up (Quadrant 1)
ENSMUSG00000055254	Ntrk2	Common up (Quadrant 1)
ENSMUSG00000020591	Ntsr2	Common up (Quadrant 1)
ENSMUSG00000024228	Nudt12	Common up (Quadrant 1)
ENSMUSG00000045211	Nudt18	Common up (Quadrant 1)
ENSMUSG00000034875	Nudt19	Common up (Quadrant 1)
ENSMUSG00000020029	Nudt4	Common up (Quadrant 1)
ENSMUSG00000031767	Nudt7	Common up (Quadrant 1)
ENSMUSG00000034829	Nxnl1	Common up (Quadrant 1)
ENSMUSG00000006784	Odad4	Common up (Quadrant 1)
ENSMUSG00000006010	Odr4	Common up (Quadrant 1)
ENSMUSG00000047094	Ofcc1	Common up (Quadrant 1)
ENSMUSG00000020456	Ogdh	Common up (Quadrant 1)
ENSMUSG00000021390	Ogn	Common up (Quadrant 1)
ENSMUSG00000045392	Olfr1033	Common up (Quadrant 1)
ENSMUSG00000046160	Olig1	Common up (Quadrant 1)
ENSMUSG00000038084	Opa1	Common up (Quadrant 1)
ENSMUSG00000031214	Ophn1	Common up (Quadrant 1)
ENSMUSG00000026525	Opn3	Common up (Quadrant 1)
ENSMUSG00000039196	Orm1	Common up (Quadrant 1)
ENSMUSG00000061540	Orm2	Common up (Quadrant 1)
ENSMUSG00000028359	Orm3	Common up (Quadrant 1)
ENSMUSG00000022807	Osbpl11	Common up (Quadrant 1)
ENSMUSG00000044252	Osbpl1a	Common up (Quadrant 1)
ENSMUSG00000042616	Oscp1	Common up (Quadrant 1)
ENSMUSG00000022186	Oxct1	Common up (Quadrant 1)
ENSMUSG00000021906	Oxnad1	Common up (Quadrant 1)
ENSMUSG00000022758	P2rx6	Common up (Quadrant 1)
ENSMUSG00000031284	Pak3	Common up (Quadrant 1)
ENSMUSG00000033377	Palmd	Common up (Quadrant 1)
ENSMUSG00000018846	Pank3	Common up (Quadrant 1)
ENSMUSG00000023909	Paqr4	Common up (Quadrant 1)
ENSMUSG00000064225	Paqr9	Common up (Quadrant 1)
ENSMUSG00000034981	Parm1	Common up (Quadrant 1)
ENSMUSG00000032392	Parp16	Common up (Quadrant 1)
ENSMUSG00000023249	Parp3	Common up (Quadrant 1)
ENSMUSG00000041650	Pcca	Common up (Quadrant 1)
ENSMUSG00000032527	Pccb	Common up (Quadrant 1)
ENSMUSG00000029108	Pcdh7	Common up (Quadrant 1)
ENSMUSG00000061601	Pclo	Common up (Quadrant 1)
ENSMUSG00000060212	Pcnx2	Common up (Quadrant 1)
ENSMUSG00000024713	Pcsk5	Common up (Quadrant 1)
ENSMUSG00000030513	Pcsk6	Common up (Quadrant 1)
ENSMUSG00000024892	Pcx	Common up (Quadrant 1)
ENSMUSG00000029998	Pcyox1	Common up (Quadrant 1)
ENSMUSG00000025137	Pcyt2	Common up (Quadrant 1)
ENSMUSG00000059173	Pde1a	Common up (Quadrant 1)
ENSMUSG00000030671	Pde3b	Common up (Quadrant 1)
ENSMUSG00000053965	Pde5a	Common up (Quadrant 1)
ENSMUSG00000032006	Pdgfd	Common up (Quadrant 1)
ENSMUSG00000031299	Pdha1	Common up (Quadrant 1)
ENSMUSG00000021748	Pdhb	Common up (Quadrant 1)
ENSMUSG00000010914	Pdhx	Common up (Quadrant 1)
ENSMUSG00000006494	Pdk1	Common up (Quadrant 1)
ENSMUSG00000038967	Pdk2	Common up (Quadrant 1)
ENSMUSG00000019577	Pdk4	Common up (Quadrant 1)
ENSMUSG00000048371	Pdp2	Common up (Quadrant 1)
ENSMUSG00000033624	Pdpr	Common up (Quadrant 1)
ENSMUSG00000022197	Pdzd2	Common up (Quadrant 1)
ENSMUSG00000026189	Pecr	Common up (Quadrant 1)
ENSMUSG00000028779	Pef1	Common up (Quadrant 1)
ENSMUSG00000092035	Peg10	Common up (Quadrant 1)
ENSMUSG00000000301	Pemt	Common up (Quadrant 1)
ENSMUSG00000063931	Pepd	Common up (Quadrant 1)
ENSMUSG00000030545	Pex11a	Common up (Quadrant 1)
ENSMUSG00000020283	Pex13	Common up (Quadrant 1)
ENSMUSG00000027222	Pex16	Common up (Quadrant 1)
ENSMUSG00000003464	Pex19	Common up (Quadrant 1)
ENSMUSG00000019809	Pex3	Common up (Quadrant 1)
ENSMUSG00000002763	Pex6	Common up (Quadrant 1)
ENSMUSG00000029373	Pf4	Common up (Quadrant 1)
ENSMUSG00000025271	Pfkfb1	Common up (Quadrant 1)
ENSMUSG00000026773	Pfkfb3	Common up (Quadrant 1)
ENSMUSG00000020277	Pfkl	Common up (Quadrant 1)
ENSMUSG00000011752	Pgam1	Common up (Quadrant 1)
ENSMUSG00000028961	Pgd	Common up (Quadrant 1)
ENSMUSG00000025791	Pgm1	Common up (Quadrant 1)
ENSMUSG00000006373	Pgrmc1	Common up (Quadrant 1)
ENSMUSG00000049940	Pgrmc2	Common up (Quadrant 1)
ENSMUSG00000038845	Phb	Common up (Quadrant 1)
ENSMUSG00000031295	Phka2	Common up (Quadrant 1)
ENSMUSG00000041801	Phlda3	Common up (Quadrant 1)
ENSMUSG00000003469	Phyhip	Common up (Quadrant 1)
ENSMUSG00000045658	Pid1	Common up (Quadrant 1)
ENSMUSG00000025728	Pigq	Common up (Quadrant 1)
ENSMUSG00000032462	Pik3cb	Common up (Quadrant 1)
ENSMUSG00000035828	Pim3	Common up (Quadrant 1)
ENSMUSG00000038725	Pkhd1l1	Common up (Quadrant 1)
ENSMUSG00000041957	Pkp2	Common up (Quadrant 1)
ENSMUSG00000027999	Pla2g12a	Common up (Quadrant 1)
ENSMUSG00000031903	Pla2g15	Common up (Quadrant 1)
ENSMUSG00000042632	Pla2g6	Common up (Quadrant 1)
ENSMUSG00000054580	Pla2r1	Common up (Quadrant 1)
ENSMUSG00000060675	Plaat3	Common up (Quadrant 1)
ENSMUSG00000095304	Plac9a	Common up (Quadrant 1)
ENSMUSG00000019817	Plagl1	Common up (Quadrant 1)
ENSMUSG00000021822	Plau	Common up (Quadrant 1)
ENSMUSG00000051177	Plcb1	Common up (Quadrant 1)
ENSMUSG00000039943	Plcb4	Common up (Quadrant 1)
ENSMUSG00000030546	Plin1	Common up (Quadrant 1)
ENSMUSG00000028494	Plin2	Common up (Quadrant 1)
ENSMUSG00000002831	Plin4	Common up (Quadrant 1)
ENSMUSG00000011305	Plin5	Common up (Quadrant 1)
ENSMUSG00000004846	Plod3	Common up (Quadrant 1)
ENSMUSG00000026640	Plxna2	Common up (Quadrant 1)
ENSMUSG00000029765	Plxna4	Common up (Quadrant 1)
ENSMUSG00000022474	Pmm1	Common up (Quadrant 1)
ENSMUSG00000018217	Pmp22	Common up (Quadrant 1)
ENSMUSG00000029017	Pmpcb	Common up (Quadrant 1)
ENSMUSG00000115338	Pnp	Common up (Quadrant 1)
ENSMUSG00000025509	Pnpla2	Common up (Quadrant 1)
ENSMUSG00000041653	Pnpla3	Common up (Quadrant 1)
ENSMUSG00000036257	Pnpla8	Common up (Quadrant 1)
ENSMUSG00000028600	Podn	Common up (Quadrant 1)
ENSMUSG00000001100	Poldip2	Common up (Quadrant 1)
ENSMUSG00000039254	Pomt1	Common up (Quadrant 1)
ENSMUSG00000002588	Pon1	Common up (Quadrant 1)
ENSMUSG00000029759	Pon3	Common up (Quadrant 1)
ENSMUSG00000005514	Por	Common up (Quadrant 1)
ENSMUSG00000020089	Ppa1	Common up (Quadrant 1)
ENSMUSG00000000440	Pparg	Common up (Quadrant 1)
ENSMUSG00000016487	Ppfibp1	Common up (Quadrant 1)
ENSMUSG00000033526	Ppip5k1	Common up (Quadrant 1)
ENSMUSG00000021096	Ppm1a	Common up (Quadrant 1)
ENSMUSG00000027784	Ppm1l	Common up (Quadrant 1)
ENSMUSG00000020253	Ppm1m	Common up (Quadrant 1)
ENSMUSG00000073557	Ppp1r12b	Common up (Quadrant 1)
ENSMUSG00000032827	Ppp1r9a	Common up (Quadrant 1)
ENSMUSG00000032058	Ppp2r1b	Common up (Quadrant 1)
ENSMUSG00000026626	Ppp2r5a	Common up (Quadrant 1)
ENSMUSG00000024777	Ppp2r5b	Common up (Quadrant 1)
ENSMUSG00000028691	Prdx1	Common up (Quadrant 1)
ENSMUSG00000024997	Prdx3	Common up (Quadrant 1)
ENSMUSG00000026701	Prdx6	Common up (Quadrant 1)
ENSMUSG00000048960	Prex2	Common up (Quadrant 1)
ENSMUSG00000006014	Prg4	Common up (Quadrant 1)
ENSMUSG00000005469	Prkaca	Common up (Quadrant 1)
ENSMUSG00000028944	Prkag2	Common up (Quadrant 1)
ENSMUSG00000032601	Prkar2a	Common up (Quadrant 1)
ENSMUSG00000002997	Prkar2b	Common up (Quadrant 1)
ENSMUSG00000045038	Prkce	Common up (Quadrant 1)
ENSMUSG00000002688	Prkd1	Common up (Quadrant 1)
ENSMUSG00000079037	Prnp	Common up (Quadrant 1)
ENSMUSG00000044122	Proca1	Common up (Quadrant 1)
ENSMUSG00000073565	Prr16	Common up (Quadrant 1)
ENSMUSG00000033361	Prrg3	Common up (Quadrant 1)
ENSMUSG00000039405	Prss23	Common up (Quadrant 1)
ENSMUSG00000039126	Prune2	Common up (Quadrant 1)
ENSMUSG00000021792	Prxl2a	Common up (Quadrant 1)
ENSMUSG00000024640	Psat1	Common up (Quadrant 1)
ENSMUSG00000026229	Psmd1	Common up (Quadrant 1)
ENSMUSG00000029446	Psph	Common up (Quadrant 1)
ENSMUSG00000040016	Ptger3	Common up (Quadrant 1)
ENSMUSG00000050737	Ptges	Common up (Quadrant 1)
ENSMUSG00000028036	Ptgfr	Common up (Quadrant 1)
ENSMUSG00000017969	Ptgis	Common up (Quadrant 1)
ENSMUSG00000032492	Pth1r	Common up (Quadrant 1)
ENSMUSG00000117310	Ptp4a1	Common up (Quadrant 1)
ENSMUSG00000034573	Ptpn13	Common up (Quadrant 1)
ENSMUSG00000020154	Ptprb	Common up (Quadrant 1)
ENSMUSG00000028399	Ptprd	Common up (Quadrant 1)
ENSMUSG00000033278	Ptprm	Common up (Quadrant 1)
ENSMUSG00000035916	Ptprq	Common up (Quadrant 1)
ENSMUSG00000020674	Pxdn	Common up (Quadrant 1)
ENSMUSG00000029499	Pxmp2	Common up (Quadrant 1)
ENSMUSG00000000876	Pxmp4	Common up (Quadrant 1)
ENSMUSG00000033059	Pygb	Common up (Quadrant 1)
ENSMUSG00000021069	Pygl	Common up (Quadrant 1)
ENSMUSG00000043162	Pyurf	Common up (Quadrant 1)
ENSMUSG00000015806	Qdpr	Common up (Quadrant 1)
ENSMUSG00000062078	Qk	Common up (Quadrant 1)
ENSMUSG00000024870	Rab1b	Common up (Quadrant 1)
ENSMUSG00000002059	Rab34	Common up (Quadrant 1)
ENSMUSG00000032549	Rab6b	Common up (Quadrant 1)
ENSMUSG00000037110	Ralgapa2	Common up (Quadrant 1)
ENSMUSG00000049892	Rasd1	Common up (Quadrant 1)
ENSMUSG00000025795	Rassf3	Common up (Quadrant 1)
ENSMUSG00000035275	Raver2	Common up (Quadrant 1)
ENSMUSG00000040043	Rbms2	Common up (Quadrant 1)
ENSMUSG00000024990	Rbp4	Common up (Quadrant 1)
ENSMUSG00000028996	Rbp7	Common up (Quadrant 1)
ENSMUSG00000032387	Rbpms2	Common up (Quadrant 1)
ENSMUSG00000022106	Rcbtb2	Common up (Quadrant 1)
ENSMUSG00000024889	Rce1	Common up (Quadrant 1)
ENSMUSG00000005873	Reep5	Common up (Quadrant 1)
ENSMUSG00000035504	Reep6	Common up (Quadrant 1)
ENSMUSG00000012705	Retn	Common up (Quadrant 1)
ENSMUSG00000061100	Retnla	Common up (Quadrant 1)
ENSMUSG00000056666	Retsat	Common up (Quadrant 1)
ENSMUSG00000022018	Rgcc	Common up (Quadrant 1)
ENSMUSG00000026527	Rgs7	Common up (Quadrant 1)
ENSMUSG00000054364	Rhob	Common up (Quadrant 1)
ENSMUSG00000019944	Rhobtb1	Common up (Quadrant 1)
ENSMUSG00000024143	Rhoq	Common up (Quadrant 1)
ENSMUSG00000035226	Rims4	Common up (Quadrant 1)
ENSMUSG00000070730	Rmdn3	Common up (Quadrant 1)
ENSMUSG00000028557	Rnf11	Common up (Quadrant 1)
ENSMUSG00000010086	Rnf112	Common up (Quadrant 1)
ENSMUSG00000033107	Rnf125	Common up (Quadrant 1)
ENSMUSG00000030788	Rnf141	Common up (Quadrant 1)
ENSMUSG00000038068	Rnf144b	Common up (Quadrant 1)
ENSMUSG00000048911	Rnf24	Common up (Quadrant 1)
ENSMUSG00000032125	Robo4	Common up (Quadrant 1)
ENSMUSG00000026005	Rpe	Common up (Quadrant 1)
ENSMUSG00000062309	Rpp25	Common up (Quadrant 1)
ENSMUSG00000028646	Rragc	Common up (Quadrant 1)
ENSMUSG00000038387	Rras	Common up (Quadrant 1)
ENSMUSG00000028871	Rspo1	Common up (Quadrant 1)
ENSMUSG00000019880	Rspo3	Common up (Quadrant 1)
ENSMUSG00000067924	Rtl8b	Common up (Quadrant 1)
ENSMUSG00000024758	Rtn3	Common up (Quadrant 1)
ENSMUSG00000019864	Rtn4ip1	Common up (Quadrant 1)
ENSMUSG00000044080	S100a1	Common up (Quadrant 1)
ENSMUSG00000058656	Samd12	Common up (Quadrant 1)
ENSMUSG00000009614	Sardh	Common up (Quadrant 1)
ENSMUSG00000046056	Sbsn	Common up (Quadrant 1)
ENSMUSG00000032018	Sc5d	Common up (Quadrant 1)
ENSMUSG00000038936	Sccpdh	Common up (Quadrant 1)
ENSMUSG00000037071	Scd1	Common up (Quadrant 1)
ENSMUSG00000025202	Scd3	Common up (Quadrant 1)
ENSMUSG00000063253	Scoc	Common up (Quadrant 1)
ENSMUSG00000028603	Scp2	Common up (Quadrant 1)
ENSMUSG00000058492	Scp2-ps2	Common up (Quadrant 1)
ENSMUSG00000019124	Scrn1	Common up (Quadrant 1)
ENSMUSG00000008226	Scrn3	Common up (Quadrant 1)
ENSMUSG00000022261	Sdc2	Common up (Quadrant 1)
ENSMUSG00000021577	Sdha	Common up (Quadrant 1)
ENSMUSG00000009863	Sdhb	Common up (Quadrant 1)
ENSMUSG00000058076	Sdhc	Common up (Quadrant 1)
ENSMUSG00000000171	Sdhd	Common up (Quadrant 1)
ENSMUSG00000068874	Selenbp1	Common up (Quadrant 1)
ENSMUSG00000028780	Sema3c	Common up (Quadrant 1)
ENSMUSG00000022231	Sema5a	Common up (Quadrant 1)
ENSMUSG00000049091	Sephs2	Common up (Quadrant 1)
ENSMUSG00000019917	Septin10	Common up (Quadrant 1)
ENSMUSG00000020486	Septin4	Common up (Quadrant 1)
ENSMUSG00000019877	Serinc1	Common up (Quadrant 1)
ENSMUSG00000066364	Serpina3b	Common up (Quadrant 1)
ENSMUSG00000066361	Serpina3c	Common up (Quadrant 1)
ENSMUSG00000079013	Serpina3j	Common up (Quadrant 1)
ENSMUSG00000058207	Serpina3k	Common up (Quadrant 1)
ENSMUSG00000037411	Serpine1	Common up (Quadrant 1)
ENSMUSG00000000632	Sez6	Common up (Quadrant 1)
ENSMUSG00000021474	Sfxn1	Common up (Quadrant 1)
ENSMUSG00000020354	Sgcd	Common up (Quadrant 1)
ENSMUSG00000004631	Sgce	Common up (Quadrant 1)
ENSMUSG00000004937	Sgta	Common up (Quadrant 1)
ENSMUSG00000005057	Sh2b2	Common up (Quadrant 1)
ENSMUSG00000037062	Sh3glb1	Common up (Quadrant 1)
ENSMUSG00000026860	Sh3glb2	Common up (Quadrant 1)
ENSMUSG00000053617	Sh3pxd2a	Common up (Quadrant 1)
ENSMUSG00000036553	Sh3tc1	Common up (Quadrant 1)
ENSMUSG00000053930	Shisa6	Common up (Quadrant 1)
ENSMUSG00000036078	Sigmar1	Common up (Quadrant 1)
ENSMUSG00000037112	Sik2	Common up (Quadrant 1)
ENSMUSG00000036309	Skp1	Common up (Quadrant 1)
ENSMUSG00000032902	Slc16a1	Common up (Quadrant 1)
ENSMUSG00000019838	Slc16a10	Common up (Quadrant 1)
ENSMUSG00000037455	Slc18b1	Common up (Quadrant 1)
ENSMUSG00000005360	Slc1a3	Common up (Quadrant 1)
ENSMUSG00000001918	Slc1a5	Common up (Quadrant 1)
ENSMUSG00000070280	Slc22a14	Common up (Quadrant 1)
ENSMUSG00000023828	Slc22a3	Common up (Quadrant 1)
ENSMUSG00000020334	Slc22a4	Common up (Quadrant 1)
ENSMUSG00000018900	Slc22a5	Common up (Quadrant 1)
ENSMUSG00000029847	Slc23a4	Common up (Quadrant 1)
ENSMUSG00000063873	Slc24a3	Common up (Quadrant 1)
ENSMUSG00000003528	Slc25a1	Common up (Quadrant 1)
ENSMUSG00000025792	Slc25a10	Common up (Quadrant 1)
ENSMUSG00000071253	Slc25a16	Common up (Quadrant 1)
ENSMUSG00000020744	Slc25a19	Common up (Quadrant 1)
ENSMUSG00000019082	Slc25a22	Common up (Quadrant 1)
ENSMUSG00000046329	Slc25a23	Common up (Quadrant 1)
ENSMUSG00000026819	Slc25a25	Common up (Quadrant 1)
ENSMUSG00000061904	Slc25a3	Common up (Quadrant 1)
ENSMUSG00000018677	Slc25a39	Common up (Quadrant 1)
ENSMUSG00000002346	Slc25a42	Common up (Quadrant 1)
ENSMUSG00000050144	Slc25a44	Common up (Quadrant 1)
ENSMUSG00000031808	Slc27a1	Common up (Quadrant 1)
ENSMUSG00000036298	Slc2a13	Common up (Quadrant 1)
ENSMUSG00000018566	Slc2a4	Common up (Quadrant 1)
ENSMUSG00000018999	Slc35b4	Common up (Quadrant 1)
ENSMUSG00000020264	Slc36a2	Common up (Quadrant 1)
ENSMUSG00000061171	Slc38a11	Common up (Quadrant 1)
ENSMUSG00000053897	Slc39a8	Common up (Quadrant 1)
ENSMUSG00000027075	Slc43a1	Common up (Quadrant 1)
ENSMUSG00000027074	Slc43a3	Common up (Quadrant 1)
ENSMUSG00000081534	Slc48a1	Common up (Quadrant 1)
ENSMUSG00000060961	Slc4a4	Common up (Quadrant 1)
ENSMUSG00000089774	Slc5a3	Common up (Quadrant 1)
ENSMUSG00000030108	Slc6a13	Common up (Quadrant 1)
ENSMUSG00000027894	Slc6a17	Common up (Quadrant 1)
ENSMUSG00000055368	Slc6a2	Common up (Quadrant 1)
ENSMUSG00000030495	Slc7a10	Common up (Quadrant 1)
ENSMUSG00000060681	Slc9a6	Common up (Quadrant 1)
ENSMUSG00000025369	Smarcc2	Common up (Quadrant 1)
ENSMUSG00000072704	Smim10l1	Common up (Quadrant 1)
ENSMUSG00000031534	Smim19	Common up (Quadrant 1)
ENSMUSG00000021136	Smoc1	Common up (Quadrant 1)
ENSMUSG00000023886	Smoc2	Common up (Quadrant 1)
ENSMUSG00000037049	Smpd1	Common up (Quadrant 1)
ENSMUSG00000031906	Smpd3	Common up (Quadrant 1)
ENSMUSG00000044349	Snhg11	Common up (Quadrant 1)
ENSMUSG00000038145	Snrk	Common up (Quadrant 1)
ENSMUSG00000102252	Snrpn	Common up (Quadrant 1)
ENSMUSG00000060429	Sntb1	Common up (Quadrant 1)
ENSMUSG00000022982	Sod1	Common up (Quadrant 1)
ENSMUSG00000006818	Sod2	Common up (Quadrant 1)
ENSMUSG00000072941	Sod3	Common up (Quadrant 1)
ENSMUSG00000025006	Sorbs1	Common up (Quadrant 1)
ENSMUSG00000027227	Sord	Common up (Quadrant 1)
ENSMUSG00000068747	Sort1	Common up (Quadrant 1)
ENSMUSG00000098188	Sowahc	Common up (Quadrant 1)
ENSMUSG00000051910	Sox6	Common up (Quadrant 1)
ENSMUSG00000028475	Spaar	Common up (Quadrant 1)
ENSMUSG00000064202	Spata6l	Common up (Quadrant 1)
ENSMUSG00000032388	Spg21	Common up (Quadrant 1)
ENSMUSG00000058297	Spock2	Common up (Quadrant 1)
ENSMUSG00000038156	Spon1	Common up (Quadrant 1)
ENSMUSG00000024427	Spry4	Common up (Quadrant 1)
ENSMUSG00000020315	Sptbn1	Common up (Quadrant 1)
ENSMUSG00000005803	Sqor	Common up (Quadrant 1)
ENSMUSG00000020538	Srebf1	Common up (Quadrant 1)
ENSMUSG00000037014	Sstr4	Common up (Quadrant 1)
ENSMUSG00000022403	St13	Common up (Quadrant 1)
ENSMUSG00000028538	St3gal3	Common up (Quadrant 1)
ENSMUSG00000022747	St3gal6	Common up (Quadrant 1)
ENSMUSG00000016128	Stard13	Common up (Quadrant 1)
ENSMUSG00000012428	Steap4	Common up (Quadrant 1)
ENSMUSG00000006423	Steep1	Common up (Quadrant 1)
ENSMUSG00000026880	Stom	Common up (Quadrant 1)
ENSMUSG00000026027	Stradb	Common up (Quadrant 1)
ENSMUSG00000032437	Stt3b	Common up (Quadrant 1)
ENSMUSG00000030806	Stx1b	Common up (Quadrant 1)
ENSMUSG00000022110	Sucla2	Common up (Quadrant 1)
ENSMUSG00000052738	Suclg1	Common up (Quadrant 1)
ENSMUSG00000061838	Suclg2	Common up (Quadrant 1)
ENSMUSG00000027762	Sucnr1	Common up (Quadrant 1)
ENSMUSG00000055137	Sugct	Common up (Quadrant 1)
ENSMUSG00000030711	Sult1a1	Common up (Quadrant 1)
ENSMUSG00000014867	Surf4	Common up (Quadrant 1)
ENSMUSG00000074093	Svip	Common up (Quadrant 1)
ENSMUSG00000031357	Syap1	Common up (Quadrant 1)
ENSMUSG00000096054	Syne1	Common up (Quadrant 1)
ENSMUSG00000025503	Taldo1	Common up (Quadrant 1)
ENSMUSG00000022364	Tbc1d31	Common up (Quadrant 1)
ENSMUSG00000045680	Tcf21	Common up (Quadrant 1)
ENSMUSG00000006642	Tcf23	Common up (Quadrant 1)
ENSMUSG00000020432	Tcn2	Common up (Quadrant 1)
ENSMUSG00000050052	Tdrp	Common up (Quadrant 1)
ENSMUSG00000031708	Tecr	Common up (Quadrant 1)
ENSMUSG00000048078	Tenm4	Common up (Quadrant 1)
ENSMUSG00000040548	Tex2	Common up (Quadrant 1)
ENSMUSG00000056429	Tgoln1	Common up (Quadrant 1)
ENSMUSG00000074743	Thbd	Common up (Quadrant 1)
ENSMUSG00000021779	Thrb	Common up (Quadrant 1)
ENSMUSG00000035686	Thrsp	Common up (Quadrant 1)
ENSMUSG00000033191	Tie1	Common up (Quadrant 1)
ENSMUSG00000003438	Timm50	Common up (Quadrant 1)
ENSMUSG00000030317	Timp4	Common up (Quadrant 1)
ENSMUSG00000034640	Tiparp	Common up (Quadrant 1)
ENSMUSG00000019437	Tlcd1	Common up (Quadrant 1)
ENSMUSG00000038217	Tlcd2	Common up (Quadrant 1)
ENSMUSG00000058966	Tlcd3b	Common up (Quadrant 1)
ENSMUSG00000052698	Tln2	Common up (Quadrant 1)
ENSMUSG00000024799	Tm7sf2	Common up (Quadrant 1)
ENSMUSG00000020023	Tmcc3	Common up (Quadrant 1)
ENSMUSG00000052428	Tmco1	Common up (Quadrant 1)
ENSMUSG00000069763	Tmem100	Common up (Quadrant 1)
ENSMUSG00000034659	Tmem109	Common up (Quadrant 1)
ENSMUSG00000054675	Tmem119	Common up (Quadrant 1)
ENSMUSG00000039886	Tmem120a	Common up (Quadrant 1)
ENSMUSG00000054434	Tmem120b	Common up (Quadrant 1)
ENSMUSG00000024845	Tmem134	Common up (Quadrant 1)
ENSMUSG00000039428	Tmem135	Common up (Quadrant 1)
ENSMUSG00000002781	Tmem143	Common up (Quadrant 1)
ENSMUSG00000006315	Tmem147	Common up (Quadrant 1)
ENSMUSG00000021361	Tmem14c	Common up (Quadrant 1)
ENSMUSG00000061451	Tmem151a	Common up (Quadrant 1)
ENSMUSG00000054013	Tmem179	Common up (Quadrant 1)
ENSMUSG00000079588	Tmem182	Common up (Quadrant 1)
ENSMUSG00000009035	Tmem184b	Common up (Quadrant 1)
ENSMUSG00000040883	Tmem205	Common up (Quadrant 1)
ENSMUSG00000004945	Tmem242	Common up (Quadrant 1)
ENSMUSG00000055296	Tmem245	Common up (Quadrant 1)
ENSMUSG00000036502	Tmem255a	Common up (Quadrant 1)
ENSMUSG00000030095	Tmem43	Common up (Quadrant 1)
ENSMUSG00000022964	Tmem50b	Common up (Quadrant 1)
ENSMUSG00000048772	Tmem53	Common up (Quadrant 1)
ENSMUSG00000025940	Tmem70	Common up (Quadrant 1)
ENSMUSG00000073680	Tmem88b	Common up (Quadrant 1)
ENSMUSG00000035413	Tmem98	Common up (Quadrant 1)
ENSMUSG00000030306	Tmtc1	Common up (Quadrant 1)
ENSMUSG00000050043	Tmx2	Common up (Quadrant 1)
ENSMUSG00000063727	Tnfrsf11b	Common up (Quadrant 1)
ENSMUSG00000060548	Tnfrsf19	Common up (Quadrant 1)
ENSMUSG00000055322	Tns1	Common up (Quadrant 1)
ENSMUSG00000021376	Tpmt	Common up (Quadrant 1)
ENSMUSG00000021573	Tppp	Common up (Quadrant 1)
ENSMUSG00000005981	Trap1	Common up (Quadrant 1)
ENSMUSG00000020993	Trappc6b	Common up (Quadrant 1)
ENSMUSG00000046275	Trarg1	Common up (Quadrant 1)
ENSMUSG00000032554	Trf	Common up (Quadrant 1)
ENSMUSG00000050663	Trhde	Common up (Quadrant 1)
ENSMUSG00000027716	Trpc3	Common up (Quadrant 1)
ENSMUSG00000039826	Trub2	Common up (Quadrant 1)
ENSMUSG00000002496	Tsc2	Common up (Quadrant 1)
ENSMUSG00000020963	Tshr	Common up (Quadrant 1)
ENSMUSG00000029669	Tspan12	Common up (Quadrant 1)
ENSMUSG00000027217	Tspan18	Common up (Quadrant 1)
ENSMUSG00000058254	Tspan7	Common up (Quadrant 1)
ENSMUSG00000041736	Tspo	Common up (Quadrant 1)
ENSMUSG00000033530	Ttc7b	Common up (Quadrant 1)
ENSMUSG00000034714	Ttyh2	Common up (Quadrant 1)
ENSMUSG00000073838	Tufm	Common up (Quadrant 1)
ENSMUSG00000024098	Twsg1	Common up (Quadrant 1)
ENSMUSG00000038344	Txlng	Common up (Quadrant 1)
ENSMUSG00000005354	Txn2	Common up (Quadrant 1)
ENSMUSG00000021497	Txndc15	Common up (Quadrant 1)
ENSMUSG00000075704	Txnrd2	Common up (Quadrant 1)
ENSMUSG00000020087	Tysnd1	Common up (Quadrant 1)
ENSMUSG00000008348	Ubc	Common up (Quadrant 1)
ENSMUSG00000005312	Ubqln1	Common up (Quadrant 1)
ENSMUSG00000044308	Ubr3	Common up (Quadrant 1)
ENSMUSG00000029223	Uchl1	Common up (Quadrant 1)
ENSMUSG00000002550	Uck1	Common up (Quadrant 1)
ENSMUSG00000032942	Ucp3	Common up (Quadrant 1)
ENSMUSG00000001891	Ugp2	Common up (Quadrant 1)
ENSMUSG00000090145	Ugt1a6b	Common up (Quadrant 1)
ENSMUSG00000090124	Ugt1a7c	Common up (Quadrant 1)
ENSMUSG00000002058	Unc119	Common up (Quadrant 1)
ENSMUSG00000025876	Unc5a	Common up (Quadrant 1)
ENSMUSG00000049436	Upk1b	Common up (Quadrant 1)
ENSMUSG00000059534	Uqcr10	Common up (Quadrant 1)
ENSMUSG00000025651	Uqcrc1	Common up (Quadrant 1)
ENSMUSG00000030884	Uqcrc2	Common up (Quadrant 1)
ENSMUSG00000038462	Uqcrfs1	Common up (Quadrant 1)
ENSMUSG00000044894	Uqcrq	Common up (Quadrant 1)
ENSMUSG00000034911	Ushbp1	Common up (Quadrant 1)
ENSMUSG00000019820	Utrn	Common up (Quadrant 1)
ENSMUSG00000010936	Vac14	Common up (Quadrant 1)
ENSMUSG00000054455	Vapb	Common up (Quadrant 1)
ENSMUSG00000024962	Vegfb	Common up (Quadrant 1)
ENSMUSG00000031380	Vegfd	Common up (Quadrant 1)
ENSMUSG00000024076	Vit	Common up (Quadrant 1)
ENSMUSG00000066735	Vkorc1l1	Common up (Quadrant 1)
ENSMUSG00000020010	Vnn3	Common up (Quadrant 1)
ENSMUSG00000035284	Vps13c	Common up (Quadrant 1)
ENSMUSG00000044206	Vsig4	Common up (Quadrant 1)
ENSMUSG00000030889	Vwa3a	Common up (Quadrant 1)
ENSMUSG00000058997	Vwa8	Common up (Quadrant 1)
ENSMUSG00000019831	Wasf1	Common up (Quadrant 1)
ENSMUSG00000034341	Wbp2	Common up (Quadrant 1)
ENSMUSG00000039375	Wdr17	Common up (Quadrant 1)
ENSMUSG00000023336	Wfdc1	Common up (Quadrant 1)
ENSMUSG00000028173	Wls	Common up (Quadrant 1)
ENSMUSG00000027840	Wnt2b	Common up (Quadrant 1)
ENSMUSG00000074987	Wt1os	Common up (Quadrant 1)
ENSMUSG00000027803	Wwtr1	Common up (Quadrant 1)
ENSMUSG00000022401	Xpnpep3	Common up (Quadrant 1)
ENSMUSG00000022634	Yaf2	Common up (Quadrant 1)
ENSMUSG00000039770	Ypel5	Common up (Quadrant 1)
ENSMUSG00000018326	Ywhab	Common up (Quadrant 1)
ENSMUSG00000051391	Ywhag	Common up (Quadrant 1)
ENSMUSG00000049090	Zadh2	Common up (Quadrant 1)
ENSMUSG00000044477	Zfand3	Common up (Quadrant 1)
ENSMUSG00000031351	Zfp185	Common up (Quadrant 1)
ENSMUSG00000045333	Zfp423	Common up (Quadrant 1)
ENSMUSG00000078866	Zfp970	Common up (Quadrant 1)
ENSMUSG00000022306	Zfpm2	Common up (Quadrant 1)
ENSMUSG00000021286	Zfyve21	Common up (Quadrant 1)
ENSMUSG00000019923	Zwint	Common up (Quadrant 1)
ENSMUSG00000041828	Abca8a	AV_up CV_down (Quadrant 2)
ENSMUSG00000047497	Adamts12	AV_up CV_down (Quadrant 2)
ENSMUSG00000004105	Angptl2	AV_up CV_down (Quadrant 2)
ENSMUSG00000041444	Arhgap32	AV_up CV_down (Quadrant 2)
ENSMUSG00000019467	Arhgef25	AV_up CV_down (Quadrant 2)
ENSMUSG00000040118	Cacna2d1	AV_up CV_down (Quadrant 2)
ENSMUSG00000041598	Cdc42ep4	AV_up CV_down (Quadrant 2)
ENSMUSG00000015970	Chdh	AV_up CV_down (Quadrant 2)
ENSMUSG00000001435	Col18a1	AV_up CV_down (Quadrant 2)
ENSMUSG00000026043	Col3a1	AV_up CV_down (Quadrant 2)
ENSMUSG00000031078	Cttn	AV_up CV_down (Quadrant 2)
ENSMUSG00000052572	Dlg2	AV_up CV_down (Quadrant 2)
ENSMUSG00000026574	Dpt	AV_up CV_down (Quadrant 2)
ENSMUSG00000028601	Echdc2	AV_up CV_down (Quadrant 2)
ENSMUSG00000022995	Enah	AV_up CV_down (Quadrant 2)
ENSMUSG00000001036	Epn2	AV_up CV_down (Quadrant 2)
ENSMUSG00000028773	Fabp3	AV_up CV_down (Quadrant 2)
ENSMUSG00000024665	Fads2	AV_up CV_down (Quadrant 2)
ENSMUSG00000051000	Fam160a1	AV_up CV_down (Quadrant 2)
ENSMUSG00000027495	Fam210b	AV_up CV_down (Quadrant 2)
ENSMUSG00000025555	Farp1	AV_up CV_down (Quadrant 2)
ENSMUSG00000022358	Fbxo32	AV_up CV_down (Quadrant 2)
ENSMUSG00000029001	Fbxo44	AV_up CV_down (Quadrant 2)
ENSMUSG00000085396	Firre	AV_up CV_down (Quadrant 2)
ENSMUSG00000037016	Frem2	AV_up CV_down (Quadrant 2)
ENSMUSG00000007989	Fzd3	AV_up CV_down (Quadrant 2)
ENSMUSG00000028085	Gatb	AV_up CV_down (Quadrant 2)
ENSMUSG00000026473	Glul	AV_up CV_down (Quadrant 2)
ENSMUSG00000042804	Gpr153	AV_up CV_down (Quadrant 2)
ENSMUSG00000021379	Id4	AV_up CV_down (Quadrant 2)
ENSMUSG00000003477	Inmt	AV_up CV_down (Quadrant 2)
ENSMUSG00000032737	Inppl1	AV_up CV_down (Quadrant 2)
ENSMUSG00000027276	Jag1	AV_up CV_down (Quadrant 2)
ENSMUSG00000000794	Kcnn3	AV_up CV_down (Quadrant 2)
ENSMUSG00000026840	Lamc3	AV_up CV_down (Quadrant 2)
ENSMUSG00000028063	Lmna	AV_up CV_down (Quadrant 2)
ENSMUSG00000020607	Lratd1	AV_up CV_down (Quadrant 2)
ENSMUSG00000024913	Lrp5	AV_up CV_down (Quadrant 2)
ENSMUSG00000036446	Lum	AV_up CV_down (Quadrant 2)
ENSMUSG00000035342	Lzts2	AV_up CV_down (Quadrant 2)
ENSMUSG00000020695	Mrc2	AV_up CV_down (Quadrant 2)
ENSMUSG00000030739	Myh14	AV_up CV_down (Quadrant 2)
ENSMUSG00000018417	Myo1b	AV_up CV_down (Quadrant 2)
ENSMUSG00000055053	Nfic	AV_up CV_down (Quadrant 2)
ENSMUSG00000001911	Nfix	AV_up CV_down (Quadrant 2)
ENSMUSG00000042834	Nrep	AV_up CV_down (Quadrant 2)
ENSMUSG00000030717	Nupr1	AV_up CV_down (Quadrant 2)
ENSMUSG00000026211	Obsl1	AV_up CV_down (Quadrant 2)
ENSMUSG00000062257	Opcml	AV_up CV_down (Quadrant 2)
ENSMUSG00000018906	P4ha2	AV_up CV_down (Quadrant 2)
ENSMUSG00000027257	Pacsin3	AV_up CV_down (Quadrant 2)
ENSMUSG00000027188	Pamr1	AV_up CV_down (Quadrant 2)
ENSMUSG00000037892	Pcdh18	AV_up CV_down (Quadrant 2)
ENSMUSG00000031636	Pdlim3	AV_up CV_down (Quadrant 2)
ENSMUSG00000031538	Plat	AV_up CV_down (Quadrant 2)
ENSMUSG00000035172	Plekhh3	AV_up CV_down (Quadrant 2)
ENSMUSG00000038400	Pmepa1	AV_up CV_down (Quadrant 2)
ENSMUSG00000027750	Postn	AV_up CV_down (Quadrant 2)
ENSMUSG00000040653	Ppp1r14c	AV_up CV_down (Quadrant 2)
ENSMUSG00000052920	Prkg1	AV_up CV_down (Quadrant 2)
ENSMUSG00000033684	Qsox1	AV_up CV_down (Quadrant 2)
ENSMUSG00000039960	Rhou	AV_up CV_down (Quadrant 2)
ENSMUSG00000026249	Serpine2	AV_up CV_down (Quadrant 2)
ENSMUSG00000027996	Sfrp2	AV_up CV_down (Quadrant 2)
ENSMUSG00000001508	Sgca	AV_up CV_down (Quadrant 2)
ENSMUSG00000028082	Sh3d19	AV_up CV_down (Quadrant 2)
ENSMUSG00000020312	Shc2	AV_up CV_down (Quadrant 2)
ENSMUSG00000006641	Slc5a6	AV_up CV_down (Quadrant 2)
ENSMUSG00000080316	Spaca6	AV_up CV_down (Quadrant 2)
ENSMUSG00000035279	Ssc5d	AV_up CV_down (Quadrant 2)
ENSMUSG00000018604	Tbx3	AV_up CV_down (Quadrant 2)
ENSMUSG00000001604	Tcea3	AV_up CV_down (Quadrant 2)
ENSMUSG00000022389	Tef	AV_up CV_down (Quadrant 2)
ENSMUSG00000000296	Tpd52l1	AV_up CV_down (Quadrant 2)
ENSMUSG00000019487	Trip10	AV_up CV_down (Quadrant 2)
ENSMUSG00000053110	Yap1	AV_up CV_down (Quadrant 2)
ENSMUSG00000039199	Zdhhc1	AV_up CV_down (Quadrant 2)
ENSMUSG00000060206	Zfp462	AV_up CV_down (Quadrant 2)
ENSMUSG00000072694	1500011B03Rik	Common down (Quadrant 3)
ENSMUSG00000045411	2410002F23Rik	Common down (Quadrant 3)
ENSMUSG00000028536	2610528J11Rik	Common down (Quadrant 3)
ENSMUSG00000085421	4732490B19Rik	Common down (Quadrant 3)
ENSMUSG00000112627	4933412E12Rik	Common down (Quadrant 3)
ENSMUSG00000036046	5031439G07Rik	Common down (Quadrant 3)
ENSMUSG00000059939	9430015G10Rik	Common down (Quadrant 3)
ENSMUSG00000113599	9530014B07Rik	Common down (Quadrant 3)
ENSMUSG00000020865	Abcc3	Common down (Quadrant 3)
ENSMUSG00000024030	Abcg1	Common down (Quadrant 3)
ENSMUSG00000039202	Abhd2	Common down (Quadrant 3)
ENSMUSG00000032724	Abtb2	Common down (Quadrant 3)
ENSMUSG00000023328	Ache	Common down (Quadrant 3)
ENSMUSG00000022185	Acin1	Common down (Quadrant 3)
ENSMUSG00000032561	Acpp	Common down (Quadrant 3)
ENSMUSG00000032281	Acsbg1	Common down (Quadrant 3)
ENSMUSG00000027452	Acss1	Common down (Quadrant 3)
ENSMUSG00000015143	Actn1	Common down (Quadrant 3)
ENSMUSG00000054693	Adam10	Common down (Quadrant 3)
ENSMUSG00000022057	Adamdec1	Common down (Quadrant 3)
ENSMUSG00000027951	Adar	Common down (Quadrant 3)
ENSMUSG00000055301	Adh7	Common down (Quadrant 3)
ENSMUSG00000033717	Adra2a	Common down (Quadrant 3)
ENSMUSG00000042410	Agps	Common down (Quadrant 3)
ENSMUSG00000093738	AI606473	Common down (Quadrant 3)
ENSMUSG00000024045	Akap8	Common down (Quadrant 3)
ENSMUSG00000021214	Akr1c18	Common down (Quadrant 3)
ENSMUSG00000025955	Akr1cl	Common down (Quadrant 3)
ENSMUSG00000025007	Aldh18a1	Common down (Quadrant 3)
ENSMUSG00000024885	Aldh3b1	Common down (Quadrant 3)
ENSMUSG00000017390	Aldoc	Common down (Quadrant 3)
ENSMUSG00000079036	Alkbh1	Common down (Quadrant 3)
ENSMUSG00000028766	Alpl	Common down (Quadrant 3)
ENSMUSG00000031508	Ankrd10	Common down (Quadrant 3)
ENSMUSG00000022237	Ankrd33b	Common down (Quadrant 3)
ENSMUSG00000029811	Aoc1	Common down (Quadrant 3)
ENSMUSG00000003309	Ap1m2	Common down (Quadrant 3)
ENSMUSG00000054702	Ap1s3	Common down (Quadrant 3)
ENSMUSG00000009585	Apobec3	Common down (Quadrant 3)
ENSMUSG00000047631	Apof	Common down (Quadrant 3)
ENSMUSG00000028435	Aqp3	Common down (Quadrant 3)
ENSMUSG00000044217	Aqp5	Common down (Quadrant 3)
ENSMUSG00000032812	Arap1	Common down (Quadrant 3)
ENSMUSG00000044147	Arf6	Common down (Quadrant 3)
ENSMUSG00000019852	Arfgef3	Common down (Quadrant 3)
ENSMUSG00000021125	Arg2	Common down (Quadrant 3)
ENSMUSG00000034255	Arhgap27	Common down (Quadrant 3)
ENSMUSG00000074625	Arhgap40	Common down (Quadrant 3)
ENSMUSG00000028059	Arhgef2	Common down (Quadrant 3)
ENSMUSG00000021895	Arhgef3	Common down (Quadrant 3)
ENSMUSG00000040969	Arhgef38	Common down (Quadrant 3)
ENSMUSG00000007880	Arid1a	Common down (Quadrant 3)
ENSMUSG00000037447	Arid5a	Common down (Quadrant 3)
ENSMUSG00000049866	Arl4c	Common down (Quadrant 3)
ENSMUSG00000049804	Armcx4	Common down (Quadrant 3)
ENSMUSG00000026972	Arrdc1	Common down (Quadrant 3)
ENSMUSG00000042548	Asxl1	Common down (Quadrant 3)
ENSMUSG00000055415	Atp10b	Common down (Quadrant 3)
ENSMUSG00000033161	Atp1a1	Common down (Quadrant 3)
ENSMUSG00000019943	Atp2b1	Common down (Quadrant 3)
ENSMUSG00000034112	Atp2c2	Common down (Quadrant 3)
ENSMUSG00000006269	Atp6v1b1	Common down (Quadrant 3)
ENSMUSG00000060671	Atp8b2	Common down (Quadrant 3)
ENSMUSG00000078349	AW011738	Common down (Quadrant 3)
ENSMUSG00000075010	AW112010	Common down (Quadrant 3)
ENSMUSG00000024182	Axin1	Common down (Quadrant 3)
ENSMUSG00000006731	B4galnt1	Common down (Quadrant 3)
ENSMUSG00000055629	B4galnt4	Common down (Quadrant 3)
ENSMUSG00000045763	Basp1	Common down (Quadrant 3)
ENSMUSG00000040054	Baz2a	Common down (Quadrant 3)
ENSMUSG00000041660	Bbox1	Common down (Quadrant 3)
ENSMUSG00000041674	BC006965	Common down (Quadrant 3)
ENSMUSG00000087150	BC064078	Common down (Quadrant 3)
ENSMUSG00000030268	Bcat1	Common down (Quadrant 3)
ENSMUSG00000000861	Bcl11a	Common down (Quadrant 3)
ENSMUSG00000027381	Bcl2l11	Common down (Quadrant 3)
ENSMUSG00000030200	Bcl2l14	Common down (Quadrant 3)
ENSMUSG00000053175	Bcl3	Common down (Quadrant 3)
ENSMUSG00000029438	Bcl7a	Common down (Quadrant 3)
ENSMUSG00000040363	Bcor	Common down (Quadrant 3)
ENSMUSG00000046598	Bdh1	Common down (Quadrant 3)
ENSMUSG00000028545	Bend5	Common down (Quadrant 3)
ENSMUSG00000074489	Bglap3	Common down (Quadrant 3)
ENSMUSG00000031375	Bgn	Common down (Quadrant 3)
ENSMUSG00000052271	Bhlha15	Common down (Quadrant 3)
ENSMUSG00000030256	Bhlhe41	Common down (Quadrant 3)
ENSMUSG00000043782	Bicdl2	Common down (Quadrant 3)
ENSMUSG00000037905	Bri3bp	Common down (Quadrant 3)
ENSMUSG00000063663	Brwd3	Common down (Quadrant 3)
ENSMUSG00000028392	Bspry	Common down (Quadrant 3)
ENSMUSG00000020042	Btbd11	Common down (Quadrant 3)
ENSMUSG00000000706	Btn1a1	Common down (Quadrant 3)
ENSMUSG00000053216	Btn2a2	Common down (Quadrant 3)
ENSMUSG00000052951	C130021I20Rik	Common down (Quadrant 3)
ENSMUSG00000042460	C1galt1	Common down (Quadrant 3)
ENSMUSG00000015968	Cacna1d	Common down (Quadrant 3)
ENSMUSG00000003352	Cacnb3	Common down (Quadrant 3)
ENSMUSG00000013629	Cad	Common down (Quadrant 3)
ENSMUSG00000038128	Camk4	Common down (Quadrant 3)
ENSMUSG00000056737	Capg	Common down (Quadrant 3)
ENSMUSG00000024942	Capn1	Common down (Quadrant 3)
ENSMUSG00000038599	Capn8	Common down (Quadrant 3)
ENSMUSG00000039676	Capsl	Common down (Quadrant 3)
ENSMUSG00000021338	Carmil1	Common down (Quadrant 3)
ENSMUSG00000029863	Casp2	Common down (Quadrant 3)
ENSMUSG00000031885	Cbfb	Common down (Quadrant 3)
ENSMUSG00000040525	Cblc	Common down (Quadrant 3)
ENSMUSG00000053411	Cbx7	Common down (Quadrant 3)
ENSMUSG00000031150	Ccdc120	Common down (Quadrant 3)
ENSMUSG00000056531	Ccdc18	Common down (Quadrant 3)
ENSMUSG00000037979	Ccdc92	Common down (Quadrant 3)
ENSMUSG00000032532	Cck	Common down (Quadrant 3)
ENSMUSG00000094686	Ccl21a	Common down (Quadrant 3)
ENSMUSG00000009185	Ccl8	Common down (Quadrant 3)
ENSMUSG00000070348	Ccnd1	Common down (Quadrant 3)
ENSMUSG00000047139	Cd24a	Common down (Quadrant 3)
ENSMUSG00000042502	Cd2bp2	Common down (Quadrant 3)
ENSMUSG00000027215	Cd82	Common down (Quadrant 3)
ENSMUSG00000030342	Cd9	Common down (Quadrant 3)
ENSMUSG00000033502	Cdc14a	Common down (Quadrant 3)
ENSMUSG00000046722	Cdc42se1	Common down (Quadrant 3)
ENSMUSG00000047832	Cdca4	Common down (Quadrant 3)
ENSMUSG00000055612	Cdca7	Common down (Quadrant 3)
ENSMUSG00000035498	Cdcp1	Common down (Quadrant 3)
ENSMUSG00000006204	Cdcp3	Common down (Quadrant 3)
ENSMUSG00000000303	Cdh1	Common down (Quadrant 3)
ENSMUSG00000021803	Cdhr1	Common down (Quadrant 3)
ENSMUSG00000020015	Cdk17	Common down (Quadrant 3)
ENSMUSG00000038481	Cdk19	Common down (Quadrant 3)
ENSMUSG00000006728	Cdk4	Common down (Quadrant 3)
ENSMUSG00000039298	Cdk5rap2	Common down (Quadrant 3)
ENSMUSG00000003031	Cdkn1b	Common down (Quadrant 3)
ENSMUSG00000074272	Ceacam1	Common down (Quadrant 3)
ENSMUSG00000016028	Celsr1	Common down (Quadrant 3)
ENSMUSG00000024754	Cemip2	Common down (Quadrant 3)
ENSMUSG00000043987	Cep164	Common down (Quadrant 3)
ENSMUSG00000101970	Chaserr	Common down (Quadrant 3)
ENSMUSG00000064246	Chil1	Common down (Quadrant 3)
ENSMUSG00000024843	Chka	Common down (Quadrant 3)
ENSMUSG00000027536	Chmp4c	Common down (Quadrant 3)
ENSMUSG00000045613	Chrm2	Common down (Quadrant 3)
ENSMUSG00000035200	Chrnb4	Common down (Quadrant 3)
ENSMUSG00000032578	Cish	Common down (Quadrant 3)
ENSMUSG00000070803	Cited4	Common down (Quadrant 3)
ENSMUSG00000046841	Ckap4	Common down (Quadrant 3)
ENSMUSG00000000308	Ckmt1	Common down (Quadrant 3)
ENSMUSG00000056025	Clca3a1	Common down (Quadrant 3)
ENSMUSG00000028262	Clca3a2	Common down (Quadrant 3)
ENSMUSG00000070473	Cldn3	Common down (Quadrant 3)
ENSMUSG00000047501	Cldn4	Common down (Quadrant 3)
ENSMUSG00000018569	Cldn7	Common down (Quadrant 3)
ENSMUSG00000050520	Cldn8	Common down (Quadrant 3)
ENSMUSG00000007041	Clic1	Common down (Quadrant 3)
ENSMUSG00000022949	Clic6	Common down (Quadrant 3)
ENSMUSG00000006169	Clint1	Common down (Quadrant 3)
ENSMUSG00000022225	Cma1	Common down (Quadrant 3)
ENSMUSG00000020362	Cnot6	Common down (Quadrant 3)
ENSMUSG00000006782	Cnp	Common down (Quadrant 3)
ENSMUSG00000057110	Cntrl	Common down (Quadrant 3)
ENSMUSG00000025064	Col17a1	Common down (Quadrant 3)
ENSMUSG00000045672	Col27a1	Common down (Quadrant 3)
ENSMUSG00000032572	Col6a4	Common down (Quadrant 3)
ENSMUSG00000026147	Col9a1	Common down (Quadrant 3)
ENSMUSG00000028626	Col9a2	Common down (Quadrant 3)
ENSMUSG00000028337	Coro2a	Common down (Quadrant 3)
ENSMUSG00000031827	Cotl1	Common down (Quadrant 3)
ENSMUSG00000001865	Cpa3	Common down (Quadrant 3)
ENSMUSG00000055531	Cpsf6	Common down (Quadrant 3)
ENSMUSG00000027408	Cpxm1	Common down (Quadrant 3)
ENSMUSG00000019866	Crybg1	Common down (Quadrant 3)
ENSMUSG00000071714	Csf2rb2	Common down (Quadrant 3)
ENSMUSG00000060924	Csmd1	Common down (Quadrant 3)
ENSMUSG00000001622	Csn3	Common down (Quadrant 3)
ENSMUSG00000032384	Csnk1g1	Common down (Quadrant 3)
ENSMUSG00000004552	Ctse	Common down (Quadrant 3)
ENSMUSG00000038642	Ctss	Common down (Quadrant 3)
ENSMUSG00000031778	Cx3cl1	Common down (Quadrant 3)
ENSMUSG00000052336	Cx3cr1	Common down (Quadrant 3)
ENSMUSG00000021508	Cxcl14	Common down (Quadrant 3)
ENSMUSG00000029375	Cxcl15	Common down (Quadrant 3)
ENSMUSG00000019590	Cyb561	Common down (Quadrant 3)
ENSMUSG00000032323	Cyp11a1	Common down (Quadrant 3)
ENSMUSG00000024087	Cyp1b1	Common down (Quadrant 3)
ENSMUSG00000070419	Cyp3a57	Common down (Quadrant 3)
ENSMUSG00000026832	Cytip	Common down (Quadrant 3)
ENSMUSG00000115902	D730005E14Rik	Common down (Quadrant 3)
ENSMUSG00000030994	D7Ertd443e	Common down (Quadrant 3)
ENSMUSG00000028159	Dapp1	Common down (Quadrant 3)
ENSMUSG00000049354	Dcaf7	Common down (Quadrant 3)
ENSMUSG00000027797	Dclk1	Common down (Quadrant 3)
ENSMUSG00000035842	Ddx11	Common down (Quadrant 3)
ENSMUSG00000029599	Ddx54	Common down (Quadrant 3)
ENSMUSG00000032097	Ddx6	Common down (Quadrant 3)
ENSMUSG00000054499	Dedd2	Common down (Quadrant 3)
ENSMUSG00000002257	Def6	Common down (Quadrant 3)
ENSMUSG00000025357	Dgka	Common down (Quadrant 3)
ENSMUSG00000040479	Dgkz	Common down (Quadrant 3)
ENSMUSG00000030792	Dkkl1	Common down (Quadrant 3)
ENSMUSG00000047517	Dmbt1	Common down (Quadrant 3)
ENSMUSG00000061322	Dnai1	Common down (Quadrant 3)
ENSMUSG00000025279	Dnase1l3	Common down (Quadrant 3)
ENSMUSG00000003812	Dnase2a	Common down (Quadrant 3)
ENSMUSG00000004099	Dnmt1	Common down (Quadrant 3)
ENSMUSG00000068335	Dok1	Common down (Quadrant 3)
ENSMUSG00000024331	Dsc2	Common down (Quadrant 3)
ENSMUSG00000059898	Dsc3	Common down (Quadrant 3)
ENSMUSG00000044393	Dsg2	Common down (Quadrant 3)
ENSMUSG00000054889	Dsp	Common down (Quadrant 3)
ENSMUSG00000071454	Dtnb	Common down (Quadrant 3)
ENSMUSG00000029603	Dtx1	Common down (Quadrant 3)
ENSMUSG00000053716	Dusp7	Common down (Quadrant 3)
ENSMUSG00000045071	E130308A19Rik	Common down (Quadrant 3)
ENSMUSG00000095105	Edaradd	Common down (Quadrant 3)
ENSMUSG00000025967	Eef1b2	Common down (Quadrant 3)
ENSMUSG00000040659	Efhd2	Common down (Quadrant 3)
ENSMUSG00000033730	Egr3	Common down (Quadrant 3)
ENSMUSG00000012350	Ehf	Common down (Quadrant 3)
ENSMUSG00000031029	Eif3f	Common down (Quadrant 3)
ENSMUSG00000040412	Elapor1	Common down (Quadrant 3)
ENSMUSG00000036461	Elf1	Common down (Quadrant 3)
ENSMUSG00000003051	Elf3	Common down (Quadrant 3)
ENSMUSG00000027186	Elf5	Common down (Quadrant 3)
ENSMUSG00000021696	Elovl7	Common down (Quadrant 3)
ENSMUSG00000034164	Emid1	Common down (Quadrant 3)
ENSMUSG00000037370	Enpp1	Common down (Quadrant 3)
ENSMUSG00000041608	Entpd3	Common down (Quadrant 3)
ENSMUSG00000028434	Epb41l4b	Common down (Quadrant 3)
ENSMUSG00000045394	Epcam	Common down (Quadrant 3)
ENSMUSG00000010080	Epn3	Common down (Quadrant 3)
ENSMUSG00000043439	Epop	Common down (Quadrant 3)
ENSMUSG00000018166	Erbb3	Common down (Quadrant 3)
ENSMUSG00000021709	Erbin	Common down (Quadrant 3)
ENSMUSG00000020715	Ern1	Common down (Quadrant 3)
ENSMUSG00000040728	Esrp1	Common down (Quadrant 3)
ENSMUSG00000084128	Esrp2	Common down (Quadrant 3)
ENSMUSG00000030199	Etv6	Common down (Quadrant 3)
ENSMUSG00000028838	Extl1	Common down (Quadrant 3)
ENSMUSG00000052397	Ezr	Common down (Quadrant 3)
ENSMUSG00000021678	F2rl1	Common down (Quadrant 3)
ENSMUSG00000039157	Fam102a	Common down (Quadrant 3)
ENSMUSG00000035095	Fam167a	Common down (Quadrant 3)
ENSMUSG00000078670	Fam174b	Common down (Quadrant 3)
ENSMUSG00000030207	Fam234b	Common down (Quadrant 3)
ENSMUSG00000029672	Fam3c	Common down (Quadrant 3)
ENSMUSG00000046546	Fam43a	Common down (Quadrant 3)
ENSMUSG00000032358	Fam83b	Common down (Quadrant 3)
ENSMUSG00000022408	Fam83f	Common down (Quadrant 3)
ENSMUSG00000042377	Fam83g	Common down (Quadrant 3)
ENSMUSG00000030759	Far1	Common down (Quadrant 3)
ENSMUSG00000055333	Fat2	Common down (Quadrant 3)
ENSMUSG00000038274	Fau	Common down (Quadrant 3)
ENSMUSG00000047730	Fcgbp	Common down (Quadrant 3)
ENSMUSG00000032244	Fem1b	Common down (Quadrant 3)
ENSMUSG00000013338	Fer1l4	Common down (Quadrant 3)
ENSMUSG00000027356	Fermt1	Common down (Quadrant 3)
ENSMUSG00000033831	Fgb	Common down (Quadrant 3)
ENSMUSG00000030849	Fgfr2	Common down (Quadrant 3)
ENSMUSG00000033860	Fgg	Common down (Quadrant 3)
ENSMUSG00000041842	Fhdc1	Common down (Quadrant 3)
ENSMUSG00000003355	Fkbp11	Common down (Quadrant 3)
ENSMUSG00000051379	Flrt3	Common down (Quadrant 3)
ENSMUSG00000044042	Fmn1	Common down (Quadrant 3)
ENSMUSG00000035451	Foxa1	Common down (Quadrant 3)
ENSMUSG00000047861	Foxi1	Common down (Quadrant 3)
ENSMUSG00000034227	Foxj1	Common down (Quadrant 3)
ENSMUSG00000056493	Foxk1	Common down (Quadrant 3)
ENSMUSG00000048756	Foxo3	Common down (Quadrant 3)
ENSMUSG00000030067	Foxp1	Common down (Quadrant 3)
ENSMUSG00000023991	Foxp4	Common down (Quadrant 3)
ENSMUSG00000026657	Frmd4a	Common down (Quadrant 3)
ENSMUSG00000028034	Fubp1	Common down (Quadrant 3)
ENSMUSG00000055373	Fut9	Common down (Quadrant 3)
ENSMUSG00000059412	Fxyd2	Common down (Quadrant 3)
ENSMUSG00000057092	Fxyd3	Common down (Quadrant 3)
ENSMUSG00000081683	Fzd10	Common down (Quadrant 3)
ENSMUSG00000035293	G2e3	Common down (Quadrant 3)
ENSMUSG00000027361	Gabpb1	Common down (Quadrant 3)
ENSMUSG00000020159	Gabrp	Common down (Quadrant 3)
ENSMUSG00000015312	Gadd45b	Common down (Quadrant 3)
ENSMUSG00000026994	Galnt3	Common down (Quadrant 3)
ENSMUSG00000028010	Gar1	Common down (Quadrant 3)
ENSMUSG00000053332	Gas5	Common down (Quadrant 3)
ENSMUSG00000015619	Gata3	Common down (Quadrant 3)
ENSMUSG00000091387	Gcnt4	Common down (Quadrant 3)
ENSMUSG00000022103	Gfra2	Common down (Quadrant 3)
ENSMUSG00000006345	Ggt1	Common down (Quadrant 3)
ENSMUSG00000039131	Gipc2	Common down (Quadrant 3)
ENSMUSG00000069682	Gm10275	Common down (Quadrant 3)
ENSMUSG00000071532	Gm10335	Common down (Quadrant 3)
ENSMUSG00000075555	Gm10863	Common down (Quadrant 3)
ENSMUSG00000087265	Gm12349	Common down (Quadrant 3)
ENSMUSG00000083494	Gm12873	Common down (Quadrant 3)
ENSMUSG00000086549	Gm13648	Common down (Quadrant 3)
ENSMUSG00000081051	Gm15427	Common down (Quadrant 3)
ENSMUSG00000078193	Gm2000	Common down (Quadrant 3)
ENSMUSG00000093587	Gm20554	Common down (Quadrant 3)
ENSMUSG00000085442	Gm3362	Common down (Quadrant 3)
ENSMUSG00000110462	Gm35572	Common down (Quadrant 3)
ENSMUSG00000110631	Gm42047	Common down (Quadrant 3)
ENSMUSG00000106641	Gm43534	Common down (Quadrant 3)
ENSMUSG00000114277	Gm48583	Common down (Quadrant 3)
ENSMUSG00000113184	Gm49654	Common down (Quadrant 3)
ENSMUSG00000069014	Gm5641	Common down (Quadrant 3)
ENSMUSG00000057036	Gm7536	Common down (Quadrant 3)
ENSMUSG00000102752	Gm7694	Common down (Quadrant 3)
ENSMUSG00000114003	Gm9616	Common down (Quadrant 3)
ENSMUSG00000107176	Gm9794	Common down (Quadrant 3)
ENSMUSG00000095332	Gm9821	Common down (Quadrant 3)
ENSMUSG00000020611	Gna13	Common down (Quadrant 3)
ENSMUSG00000024697	Gna14	Common down (Quadrant 3)
ENSMUSG00000049092	Gpr137c	Common down (Quadrant 3)
ENSMUSG00000040133	Gpr176	Common down (Quadrant 3)
ENSMUSG00000022286	Grhl2	Common down (Quadrant 3)
ENSMUSG00000001985	Grik3	Common down (Quadrant 3)
ENSMUSG00000024858	Grk2	Common down (Quadrant 3)
ENSMUSG00000031822	Gse1	Common down (Quadrant 3)
ENSMUSG00000056895	H2bu2	Common down (Quadrant 3)
ENSMUSG00000016283	H2-M2	Common down (Quadrant 3)
ENSMUSG00000091705	H2-Q2	Common down (Quadrant 3)
ENSMUSG00000016559	H3f3b	Common down (Quadrant 3)
ENSMUSG00000006930	Hap1	Common down (Quadrant 3)
ENSMUSG00000026874	Hc	Common down (Quadrant 3)
ENSMUSG00000028800	Hdac1	Common down (Quadrant 3)
ENSMUSG00000027360	Hdc	Common down (Quadrant 3)
ENSMUSG00000053461	Hhipl2	Common down (Quadrant 3)
ENSMUSG00000034586	Hid1	Common down (Quadrant 3)
ENSMUSG00000000915	Hip1r	Common down (Quadrant 3)
ENSMUSG00000028634	Hivep3	Common down (Quadrant 3)
ENSMUSG00000037012	Hk1	Common down (Quadrant 3)
ENSMUSG00000046711	Hmga1	Common down (Quadrant 3)
ENSMUSG00000054717	Hmgb2	Common down (Quadrant 3)
ENSMUSG00000046434	Hnrnpa1	Common down (Quadrant 3)
ENSMUSG00000028572	Hook1	Common down (Quadrant 3)
ENSMUSG00000074852	Hpse2	Common down (Quadrant 3)
ENSMUSG00000047759	Hs3st3a1	Common down (Quadrant 3)
ENSMUSG00000070407	Hs3st3b1	Common down (Quadrant 3)
ENSMUSG00000020644	Id2	Common down (Quadrant 3)
ENSMUSG00000031551	Ido1	Common down (Quadrant 3)
ENSMUSG00000053560	Ier2	Common down (Quadrant 3)
ENSMUSG00000056708	Ier5	Common down (Quadrant 3)
ENSMUSG00000025491	Ifitm1	Common down (Quadrant 3)
ENSMUSG00000062157	Ifnlr1	Common down (Quadrant 3)
ENSMUSG00000036334	Igsf10	Common down (Quadrant 3)
ENSMUSG00000037995	Igsf9	Common down (Quadrant 3)
ENSMUSG00000002578	Ikzf4	Common down (Quadrant 3)
ENSMUSG00000017057	Il13ra1	Common down (Quadrant 3)
ENSMUSG00000026070	Il18r1	Common down (Quadrant 3)
ENSMUSG00000026073	Il1r2	Common down (Quadrant 3)
ENSMUSG00000022514	Il1rap	Common down (Quadrant 3)
ENSMUSG00000022900	Ildr1	Common down (Quadrant 3)
ENSMUSG00000041605	Inava	Common down (Quadrant 3)
ENSMUSG00000026638	Irf6	Common down (Quadrant 3)
ENSMUSG00000060969	Irx1	Common down (Quadrant 3)
ENSMUSG00000001504	Irx2	Common down (Quadrant 3)
ENSMUSG00000021604	Irx4	Common down (Quadrant 3)
ENSMUSG00000031737	Irx5	Common down (Quadrant 3)
ENSMUSG00000015533	Itga2	Common down (Quadrant 3)
ENSMUSG00000034664	Itga2b	Common down (Quadrant 3)
ENSMUSG00000030789	Itgax	Common down (Quadrant 3)
ENSMUSG00000020689	Itgb3	Common down (Quadrant 3)
ENSMUSG00000026223	Itm2c	Common down (Quadrant 3)
ENSMUSG00000030287	Itpr2	Common down (Quadrant 3)
ENSMUSG00000042644	Itpr3	Common down (Quadrant 3)
ENSMUSG00000037973	Itprid1	Common down (Quadrant 3)
ENSMUSG00000024789	Jak2	Common down (Quadrant 3)
ENSMUSG00000052837	Junb	Common down (Quadrant 3)
ENSMUSG00000040606	Kazn	Common down (Quadrant 3)
ENSMUSG00000058248	Kcnh1	Common down (Quadrant 3)
ENSMUSG00000044708	Kcnj10	Common down (Quadrant 3)
ENSMUSG00000033998	Kcnk1	Common down (Quadrant 3)
ENSMUSG00000023243	Kcnk5	Common down (Quadrant 3)
ENSMUSG00000054342	Kcnn4	Common down (Quadrant 3)
ENSMUSG00000028033	Kcnq5	Common down (Quadrant 3)
ENSMUSG00000040164	Kcns1	Common down (Quadrant 3)
ENSMUSG00000036225	Kctd1	Common down (Quadrant 3)
ENSMUSG00000051727	Kctd14	Common down (Quadrant 3)
ENSMUSG00000046523	Kctd4	Common down (Quadrant 3)
ENSMUSG00000037600	Kdf1	Common down (Quadrant 3)
ENSMUSG00000054611	Kdm2a	Common down (Quadrant 3)
ENSMUSG00000047153	Khnyn	Common down (Quadrant 3)
ENSMUSG00000014602	Kif1a	Common down (Quadrant 3)
ENSMUSG00000005672	Kit	Common down (Quadrant 3)
ENSMUSG00000040714	Klc3	Common down (Quadrant 3)
ENSMUSG00000002028	Kmt2a	Common down (Quadrant 3)
ENSMUSG00000048154	Kmt2d	Common down (Quadrant 3)
ENSMUSG00000045545	Krt14	Common down (Quadrant 3)
ENSMUSG00000035557	Krt17	Common down (Quadrant 3)
ENSMUSG00000023043	Krt18	Common down (Quadrant 3)
ENSMUSG00000020911	Krt19	Common down (Quadrant 3)
ENSMUSG00000061527	Krt5	Common down (Quadrant 3)
ENSMUSG00000049382	Krt8	Common down (Quadrant 3)
ENSMUSG00000021843	Ktn1	Common down (Quadrant 3)
ENSMUSG00000041782	Lad1	Common down (Quadrant 3)
ENSMUSG00000026639	Lamb3	Common down (Quadrant 3)
ENSMUSG00000026479	Lamc2	Common down (Quadrant 3)
ENSMUSG00000040434	Large2	Common down (Quadrant 3)
ENSMUSG00000026822	Lcn2	Common down (Quadrant 3)
ENSMUSG00000025223	Ldb1	Common down (Quadrant 3)
ENSMUSG00000020140	Lgr5	Common down (Quadrant 3)
ENSMUSG00000096225	Lhx8	Common down (Quadrant 3)
ENSMUSG00000054263	Lifr	Common down (Quadrant 3)
ENSMUSG00000056394	Lig1	Common down (Quadrant 3)
ENSMUSG00000040699	Limd2	Common down (Quadrant 3)
ENSMUSG00000049556	Lingo1	Common down (Quadrant 3)
ENSMUSG00000032207	Lipc	Common down (Quadrant 3)
ENSMUSG00000044626	Liph	Common down (Quadrant 3)
ENSMUSG00000022999	Lmbr1l	Common down (Quadrant 3)
ENSMUSG00000025500	Lmntd2	Common down (Quadrant 3)
ENSMUSG00000038765	Lmx1b	Common down (Quadrant 3)
ENSMUSG00000021608	Lpcat1	Common down (Quadrant 3)
ENSMUSG00000033192	Lpcat2	Common down (Quadrant 3)
ENSMUSG00000027134	Lpcat4	Common down (Quadrant 3)
ENSMUSG00000024052	Lpin2	Common down (Quadrant 3)
ENSMUSG00000068015	Lrch1	Common down (Quadrant 3)
ENSMUSG00000026961	Lrrc26	Common down (Quadrant 3)
ENSMUSG00000046807	Lrrc75b	Common down (Quadrant 3)
ENSMUSG00000026305	Lrrfip1	Common down (Quadrant 3)
ENSMUSG00000032496	Ltf	Common down (Quadrant 3)
ENSMUSG00000027297	Ltk	Common down (Quadrant 3)
ENSMUSG00000034634	Ly6d	Common down (Quadrant 3)
ENSMUSG00000041886	Macc1	Common down (Quadrant 3)
ENSMUSG00000040687	Madd	Common down (Quadrant 3)
ENSMUSG00000028164	Manba	Common down (Quadrant 3)
ENSMUSG00000015222	Map2	Common down (Quadrant 3)
ENSMUSG00000021754	Map3k1	Common down (Quadrant 3)
ENSMUSG00000031853	Map3k21	Common down (Quadrant 3)
ENSMUSG00000042724	Map3k9	Common down (Quadrant 3)
ENSMUSG00000019996	Map7	Common down (Quadrant 3)
ENSMUSG00000004864	Mapk13	Common down (Quadrant 3)
ENSMUSG00000047945	Marcksl1	Common down (Quadrant 3)
ENSMUSG00000021636	Marveld2	Common down (Quadrant 3)
ENSMUSG00000001672	Marveld3	Common down (Quadrant 3)
ENSMUSG00000031833	Mast3	Common down (Quadrant 3)
ENSMUSG00000038732	Mboat1	Common down (Quadrant 3)
ENSMUSG00000026355	Mcm6	Common down (Quadrant 3)
ENSMUSG00000061068	Mcpt4	Common down (Quadrant 3)
ENSMUSG00000074480	Mex3a	Common down (Quadrant 3)
ENSMUSG00000030605	Mfge8	Common down (Quadrant 3)
ENSMUSG00000028655	Mfsd2a	Common down (Quadrant 3)
ENSMUSG00000041439	Mfsd6	Common down (Quadrant 3)
ENSMUSG00000035621	Midn	Common down (Quadrant 3)
ENSMUSG00000054942	Miga1	Common down (Quadrant 3)
ENSMUSG00000038437	Mllt6	Common down (Quadrant 3)
ENSMUSG00000026303	Mlph	Common down (Quadrant 3)
ENSMUSG00000038342	Mlxip	Common down (Quadrant 3)
ENSMUSG00000048497	Mmgt2	Common down (Quadrant 3)
ENSMUSG00000043613	Mmp3	Common down (Quadrant 3)
ENSMUSG00000054641	Mmrn1	Common down (Quadrant 3)
ENSMUSG00000030036	Mogs	Common down (Quadrant 3)
ENSMUSG00000070305	Mpzl3	Common down (Quadrant 3)
ENSMUSG00000070547	Mrgprb1	Common down (Quadrant 3)
ENSMUSG00000042292	Mrtfa	Common down (Quadrant 3)
ENSMUSG00000021469	Msx2	Common down (Quadrant 3)
ENSMUSG00000071646	Mta2	Common down (Quadrant 3)
ENSMUSG00000029267	Mtf2	Common down (Quadrant 3)
ENSMUSG00000039431	Mtmr7	Common down (Quadrant 3)
ENSMUSG00000050808	Muc15	Common down (Quadrant 3)
ENSMUSG00000019982	Myb	Common down (Quadrant 3)
ENSMUSG00000022346	Myc	Common down (Quadrant 3)
ENSMUSG00000022443	Myh9	Common down (Quadrant 3)
ENSMUSG00000032220	Myo1e	Common down (Quadrant 3)
ENSMUSG00000037795	N4bp2	Common down (Quadrant 3)
ENSMUSG00000028334	Nans	Common down (Quadrant 3)
ENSMUSG00000028693	Nasp	Common down (Quadrant 3)
ENSMUSG00000068299	Nat8f4	Common down (Quadrant 3)
ENSMUSG00000026234	Ncl	Common down (Quadrant 3)
ENSMUSG00000043924	Ncmap	Common down (Quadrant 3)
ENSMUSG00000049001	Ndnf	Common down (Quadrant 3)
ENSMUSG00000006411	Nectin4	Common down (Quadrant 3)
ENSMUSG00000028163	Nfkb1	Common down (Quadrant 3)
ENSMUSG00000025225	Nfkb2	Common down (Quadrant 3)
ENSMUSG00000021025	Nfkbia	Common down (Quadrant 3)
ENSMUSG00000023947	Nfkbie	Common down (Quadrant 3)
ENSMUSG00000038879	Nipal2	Common down (Quadrant 3)
ENSMUSG00000028803	Nipal3	Common down (Quadrant 3)
ENSMUSG00000031311	Nono	Common down (Quadrant 3)
ENSMUSG00000030562	Nox4	Common down (Quadrant 3)
ENSMUSG00000057113	Npm1	Common down (Quadrant 3)
ENSMUSG00000066392	Nrxn3	Common down (Quadrant 3)
ENSMUSG00000060739	Nsa2	Common down (Quadrant 3)
ENSMUSG00000054823	Nsd3	Common down (Quadrant 3)
ENSMUSG00000032420	Nt5e	Common down (Quadrant 3)
ENSMUSG00000074121	Ntf5	Common down (Quadrant 3)
ENSMUSG00000009772	Nuak2	Common down (Quadrant 3)
ENSMUSG00000031754	Nudt21	Common down (Quadrant 3)
ENSMUSG00000030091	Nup210	Common down (Quadrant 3)
ENSMUSG00000031410	Nxf7	Common down (Quadrant 3)
ENSMUSG00000021638	Ocln	Common down (Quadrant 3)
ENSMUSG00000026158	Ogfrl1	Common down (Quadrant 3)
ENSMUSG00000022026	Olfm4	Common down (Quadrant 3)
ENSMUSG00000029822	Osbpl3	Common down (Quadrant 3)
ENSMUSG00000038534	Osbpl7	Common down (Quadrant 3)
ENSMUSG00000051596	Otop1	Common down (Quadrant 3)
ENSMUSG00000037279	Ovol2	Common down (Quadrant 3)
ENSMUSG00000024855	Pacs1	Common down (Quadrant 3)
ENSMUSG00000028927	Padi2	Common down (Quadrant 3)
ENSMUSG00000005447	Pafah1b3	Common down (Quadrant 3)
ENSMUSG00000030774	Pak1	Common down (Quadrant 3)
ENSMUSG00000029647	Pan3	Common down (Quadrant 3)
ENSMUSG00000021725	Parp8	Common down (Quadrant 3)
ENSMUSG00000061859	Patj	Common down (Quadrant 3)
ENSMUSG00000020453	Patz1	Common down (Quadrant 3)
ENSMUSG00000044250	Pced1b	Common down (Quadrant 3)
ENSMUSG00000025050	Pcgf6	Common down (Quadrant 3)
ENSMUSG00000028525	Pde4b	Common down (Quadrant 3)
ENSMUSG00000022090	Pdlim2	Common down (Quadrant 3)
ENSMUSG00000037652	Phc3	Common down (Quadrant 3)
ENSMUSG00000036062	Phf24	Common down (Quadrant 3)
ENSMUSG00000074277	Phldb3	Common down (Quadrant 3)
ENSMUSG00000026447	Pik3c2b	Common down (Quadrant 3)
ENSMUSG00000034614	Pik3ip1	Common down (Quadrant 3)
ENSMUSG00000034902	Pip5k1c	Common down (Quadrant 3)
ENSMUSG00000035268	Pkig	Common down (Quadrant 3)
ENSMUSG00000026413	Pkp1	Common down (Quadrant 3)
ENSMUSG00000054065	Pkp3	Common down (Quadrant 3)
ENSMUSG00000051413	Plagl2	Common down (Quadrant 3)
ENSMUSG00000029134	Plb1	Common down (Quadrant 3)
ENSMUSG00000034330	Plcg2	Common down (Quadrant 3)
ENSMUSG00000029055	Plch2	Common down (Quadrant 3)
ENSMUSG00000022565	Plec	Common down (Quadrant 3)
ENSMUSG00000037552	Plekhg2	Common down (Quadrant 3)
ENSMUSG00000060716	Plekhh1	Common down (Quadrant 3)
ENSMUSG00000078485	Plekhn1	Common down (Quadrant 3)
ENSMUSG00000035818	Plekhs1	Common down (Quadrant 3)
ENSMUSG00000032068	Plet1	Common down (Quadrant 3)
ENSMUSG00000049493	Pls1	Common down (Quadrant 3)
ENSMUSG00000032369	Plscr1	Common down (Quadrant 3)
ENSMUSG00000036606	Plxnb2	Common down (Quadrant 3)
ENSMUSG00000034607	Pof1b	Common down (Quadrant 3)
ENSMUSG00000030726	Pold3	Common down (Quadrant 3)
ENSMUSG00000039621	Prex1	Common down (Quadrant 3)
ENSMUSG00000021948	Prkcd	Common down (Quadrant 3)
ENSMUSG00000027376	Prom2	Common down (Quadrant 3)
ENSMUSG00000010175	Prox1	Common down (Quadrant 3)
ENSMUSG00000047040	Prr15l	Common down (Quadrant 3)
ENSMUSG00000034686	Prr7	Common down (Quadrant 3)
ENSMUSG00000027171	Prrg4	Common down (Quadrant 3)
ENSMUSG00000006179	Prss16	Common down (Quadrant 3)
ENSMUSG00000030800	Prss8	Common down (Quadrant 3)
ENSMUSG00000024338	Psmb8	Common down (Quadrant 3)
ENSMUSG00000026238	Ptma	Common down (Quadrant 3)
ENSMUSG00000029838	Ptn	Common down (Quadrant 3)
ENSMUSG00000027540	Ptpn1	Common down (Quadrant 3)
ENSMUSG00000026126	Ptpn18	Common down (Quadrant 3)
ENSMUSG00000041836	Ptpre	Common down (Quadrant 3)
ENSMUSG00000025314	Ptprj	Common down (Quadrant 3)
ENSMUSG00000053141	Ptprt	Common down (Quadrant 3)
ENSMUSG00000027832	Ptx3	Common down (Quadrant 3)
ENSMUSG00000021411	Pxdc1	Common down (Quadrant 3)
ENSMUSG00000043587	Pxylp1	Common down (Quadrant 3)
ENSMUSG00000030674	Qprt	Common down (Quadrant 3)
ENSMUSG00000078949	R3hdml	Common down (Quadrant 3)
ENSMUSG00000031488	Rab11fip1	Common down (Quadrant 3)
ENSMUSG00000017639	Rab11fip4	Common down (Quadrant 3)
ENSMUSG00000026304	Rab17	Common down (Quadrant 3)
ENSMUSG00000029923	Rab19	Common down (Quadrant 3)
ENSMUSG00000031504	Rab20	Common down (Quadrant 3)
ENSMUSG00000008601	Rab25	Common down (Quadrant 3)
ENSMUSG00000024511	Rab27b	Common down (Quadrant 3)
ENSMUSG00000020372	Rack1	Common down (Quadrant 3)
ENSMUSG00000022246	Rai14	Common down (Quadrant 3)
ENSMUSG00000037992	Rara	Common down (Quadrant 3)
ENSMUSG00000029602	Rasal1	Common down (Quadrant 3)
ENSMUSG00000043003	Rasef	Common down (Quadrant 3)
ENSMUSG00000020374	Rasgef1c	Common down (Quadrant 3)
ENSMUSG00000038980	Rbbp8nl	Common down (Quadrant 3)
ENSMUSG00000031167	Rbm3	Common down (Quadrant 3)
ENSMUSG00000040945	Rcc2	Common down (Quadrant 3)
ENSMUSG00000037896	Rcor1	Common down (Quadrant 3)
ENSMUSG00000042453	Reln	Common down (Quadrant 3)
ENSMUSG00000022270	Retreg1	Common down (Quadrant 3)
ENSMUSG00000019841	Rev3l	Common down (Quadrant 3)
ENSMUSG00000024186	Rgs11	Common down (Quadrant 3)
ENSMUSG00000020599	Rgs9	Common down (Quadrant 3)
ENSMUSG00000020806	Rhbdf2	Common down (Quadrant 3)
ENSMUSG00000034226	Rhov	Common down (Quadrant 3)
ENSMUSG00000005251	Ripk4	Common down (Quadrant 3)
ENSMUSG00000034177	Rnf43	Common down (Quadrant 3)
ENSMUSG00000022883	Robo1	Common down (Quadrant 3)
ENSMUSG00000052516	Robo2	Common down (Quadrant 3)
ENSMUSG00000008682	Rpl10	Common down (Quadrant 3)
[truncated: 355 more rows]

## Sheet: OV vs CV & AV vs CV common DEGs
gene_id	gene_name	type	Corresponding to figure S7A
ENSMUSG00000042041	2010003K11Rik	Common up (Quadrant 1)
ENSMUSG00000038007	Acer2	Common up (Quadrant 1)
ENSMUSG00000042429	Adora1	Common up (Quadrant 1)
ENSMUSG00000024747	Aldh1a7	Common up (Quadrant 1)
ENSMUSG00000057315	Arhgap24	Common up (Quadrant 1)
ENSMUSG00000032911	Cspg4	Common up (Quadrant 1)
ENSMUSG00000031924	Cyb5b	Common up (Quadrant 1)
ENSMUSG00000059824	Dbp	Common up (Quadrant 1)
ENSMUSG00000030747	Dgat2	Common up (Quadrant 1)
ENSMUSG00000082691	Dynlt1-ps1	Common up (Quadrant 1)
ENSMUSG00000027533	Fabp5	Common up (Quadrant 1)
ENSMUSG00000026473	Glul	Common up (Quadrant 1)
ENSMUSG00000100862	Gm10925	Common up (Quadrant 1)
ENSMUSG00000101111	Gm28437	Common up (Quadrant 1)
ENSMUSG00000102070	Gm28661	Common up (Quadrant 1)
ENSMUSG00000023019	Gpd1	Common up (Quadrant 1)
ENSMUSG00000042249	Grk3	Common up (Quadrant 1)
ENSMUSG00000035376	Hacd2	Common up (Quadrant 1)
ENSMUSG00000003949	Hlf	Common up (Quadrant 1)
ENSMUSG00000032279	Idh3a	Common up (Quadrant 1)
ENSMUSG00000030087	Klf15	Common up (Quadrant 1)
ENSMUSG00000049327	Kmt5a	Common up (Quadrant 1)
ENSMUSG00000030246	Ldhb	Common up (Quadrant 1)
ENSMUSG00000020593	Lpin1	Common up (Quadrant 1)
ENSMUSG00000045776	Lrtm1	Common up (Quadrant 1)
ENSMUSG00000031442	Mcf2l	Common up (Quadrant 1)
ENSMUSG00000018169	Mfng	Common up (Quadrant 1)
ENSMUSG00000020190	Mknk2	Common up (Quadrant 1)
ENSMUSG00000039956	Mrap	Common up (Quadrant 1)
ENSMUSG00000064354	mt-Co2	Common up (Quadrant 1)
ENSMUSG00000064358	mt-Co3	Common up (Quadrant 1)
ENSMUSG00000020889	Nr1d1	Common up (Quadrant 1)
ENSMUSG00000021775	Nr1d2	Common up (Quadrant 1)
ENSMUSG00000026672	Optn	Common up (Quadrant 1)
ENSMUSG00000055866	Per2	Common up (Quadrant 1)
ENSMUSG00000028957	Per3	Common up (Quadrant 1)
ENSMUSG00000018217	Pmp22	Common up (Quadrant 1)
ENSMUSG00000045102	Poln	Common up (Quadrant 1)
ENSMUSG00000041696	Rasl12	Common up (Quadrant 1)
ENSMUSG00000009378	Slc16a12	Common up (Quadrant 1)
ENSMUSG00000098188	Sowahc	Common up (Quadrant 1)
ENSMUSG00000022389	Tef	Common up (Quadrant 1)
ENSMUSG00000038217	Tlcd2	Common up (Quadrant 1)
ENSMUSG00000002058	Unc119	Common up (Quadrant 1)
ENSMUSG00000066687	Zbtb16	Common up (Quadrant 1)
ENSMUSG00000035877	Zhx3	Common up (Quadrant 1)
ENSMUSG00000027656	Ccn5	AV_up OV_down (Quadrant 2)
ENSMUSG00000025934	Gsta3	AV_up OV_down (Quadrant 2)
ENSMUSG00000033416	Gucd1	AV_up OV_down (Quadrant 2)
ENSMUSG00000003477	Inmt	AV_up OV_down (Quadrant 2)
ENSMUSG00000022893	Adamts1	Common down (Quadrant 3)
ENSMUSG00000022840	Adcy5	Common down (Quadrant 3)
ENSMUSG00000004730	Adgre1	Common down (Quadrant 3)
ENSMUSG00000020473	Aebp1	Common down (Quadrant 3)
ENSMUSG00000037138	Aff3	Common down (Quadrant 3)
ENSMUSG00000025955	Akr1cl	Common down (Quadrant 3)
ENSMUSG00000057346	Apol9a	Common down (Quadrant 3)
ENSMUSG00000068246	Apol9b	Common down (Quadrant 3)
ENSMUSG00000044217	Aqp5	Common down (Quadrant 3)
ENSMUSG00000073418	C4b	Common down (Quadrant 3)
ENSMUSG00000035042	Ccl5	Common down (Quadrant 3)
ENSMUSG00000051906	Cd209f	Common down (Quadrant 3)
ENSMUSG00000024610	Cd74	Common down (Quadrant 3)
ENSMUSG00000001128	Cfp	Common down (Quadrant 3)
ENSMUSG00000036596	Cpz	Common down (Quadrant 3)
ENSMUSG00000035403	Crb2	Common down (Quadrant 3)
ENSMUSG00000032359	Ctsh	Common down (Quadrant 3)
ENSMUSG00000038642	Ctss	Common down (Quadrant 3)
ENSMUSG00000018920	Cxcl16	Common down (Quadrant 3)
ENSMUSG00000018008	Cyth4	Common down (Quadrant 3)
ENSMUSG00000037868	Egr2	Common down (Quadrant 3)
ENSMUSG00000052397	Ezr	Common down (Quadrant 3)
ENSMUSG00000037816	Fbxw17	Common down (Quadrant 3)
ENSMUSG00000047787	Flrt1	Common down (Quadrant 3)
ENSMUSG00000047414	Flrt2	Common down (Quadrant 3)
ENSMUSG00000031451	Gas6	Common down (Quadrant 3)
ENSMUSG00000105096	Gbp10	Common down (Quadrant 3)
ENSMUSG00000040264	Gbp2b	Common down (Quadrant 3)
ENSMUSG00000086962	Gm12248	Common down (Quadrant 3)
ENSMUSG00000082292	Gm12250	Common down (Quadrant 3)
ENSMUSG00000018339	Gpx3	Common down (Quadrant 3)
ENSMUSG00000056870	Gulp1	Common down (Quadrant 3)
ENSMUSG00000036594	H2-Aa	Common down (Quadrant 3)
ENSMUSG00000073421	H2-Ab1	Common down (Quadrant 3)
ENSMUSG00000060586	H2-Eb1	Common down (Quadrant 3)
ENSMUSG00000067212	H2-T23	Common down (Quadrant 3)
ENSMUSG00000039628	Hs3st6	Common down (Quadrant 3)
ENSMUSG00000006205	Htra1	Common down (Quadrant 3)
ENSMUSG00000073489	Ifi204	Common down (Quadrant 3)
ENSMUSG00000054203	Ifi205	Common down (Quadrant 3)
ENSMUSG00000026536	Ifi211	Common down (Quadrant 3)
ENSMUSG00000073491	Ifi213	Common down (Quadrant 3)
ENSMUSG00000078920	Ifi47	Common down (Quadrant 3)
ENSMUSG00000062488	Ifit3b	Common down (Quadrant 3)
ENSMUSG00000023046	Igfbp6	Common down (Quadrant 3)
ENSMUSG00000054072	Iigp1	Common down (Quadrant 3)
ENSMUSG00000002897	Il17ra	Common down (Quadrant 3)
ENSMUSG00000030748	Il4ra	Common down (Quadrant 3)
ENSMUSG00000021356	Irf4	Common down (Quadrant 3)
ENSMUSG00000069874	Irgm2	Common down (Quadrant 3)
ENSMUSG00000055980	Irs1	Common down (Quadrant 3)
ENSMUSG00000035692	Isg15	Common down (Quadrant 3)
ENSMUSG00000034271	Jdp2	Common down (Quadrant 3)
ENSMUSG00000020911	Krt19	Common down (Quadrant 3)
ENSMUSG00000049382	Krt8	Common down (Quadrant 3)
ENSMUSG00000035202	Lars2	Common down (Quadrant 3)
ENSMUSG00000040249	Lrp1	Common down (Quadrant 3)
ENSMUSG00000054619	Mettl7a1	Common down (Quadrant 3)
ENSMUSG00000039533	Mmd2	Common down (Quadrant 3)
ENSMUSG00000046805	Mpeg1	Common down (Quadrant 3)
ENSMUSG00000033763	Mtss2	Common down (Quadrant 3)
ENSMUSG00000022346	Myc	Common down (Quadrant 3)
ENSMUSG00000025885	Myo5b	Common down (Quadrant 3)
ENSMUSG00000036098	Myrf	Common down (Quadrant 3)
ENSMUSG00000027574	Nkain4	Common down (Quadrant 3)
ENSMUSG00000026077	Npas2	Common down (Quadrant 3)
ENSMUSG00000055254	Ntrk2	Common down (Quadrant 3)
ENSMUSG00000021396	Nxnl2	Common down (Quadrant 3)
ENSMUSG00000032661	Oas3	Common down (Quadrant 3)
ENSMUSG00000021390	Ogn	Common down (Quadrant 3)
ENSMUSG00000024713	Pcsk5	Common down (Quadrant 3)
ENSMUSG00000003469	Phyhip	Common down (Quadrant 3)
ENSMUSG00000041202	Pla2g2d	Common down (Quadrant 3)
ENSMUSG00000095304	Plac9a	Common down (Quadrant 3)
ENSMUSG00000032374	Plod2	Common down (Quadrant 3)
ENSMUSG00000035835	Plppr3	Common down (Quadrant 3)
ENSMUSG00000057729	Prtn3	Common down (Quadrant 3)
ENSMUSG00000027593	Raly	Common down (Quadrant 3)
ENSMUSG00000019235	Rps6kl1	Common down (Quadrant 3)
ENSMUSG00000028871	Rspo1	Common down (Quadrant 3)
ENSMUSG00000042842	Serpinb6b	Common down (Quadrant 3)
ENSMUSG00000027322	Siglec1	Common down (Quadrant 3)
ENSMUSG00000089774	Slc5a3	Common down (Quadrant 3)
ENSMUSG00000020733	Slc9a3r1	Common down (Quadrant 3)
ENSMUSG00000047793	Sned1	Common down (Quadrant 3)
ENSMUSG00000020027	Socs2	Common down (Quadrant 3)
ENSMUSG00000029093	Sorcs2	Common down (Quadrant 3)
ENSMUSG00000070034	Sp110	Common down (Quadrant 3)
ENSMUSG00000038156	Spon1	Common down (Quadrant 3)
ENSMUSG00000037379	Spon2	Common down (Quadrant 3)
ENSMUSG00000025789	St8sia2	Common down (Quadrant 3)
ENSMUSG00000037321	Tap1	Common down (Quadrant 3)
ENSMUSG00000045680	Tcf21	Common down (Quadrant 3)
ENSMUSG00000037820	Tgm2	Common down (Quadrant 3)
ENSMUSG00000040152	Thbs1	Common down (Quadrant 3)
ENSMUSG00000061451	Tmem151a	Common down (Quadrant 3)
ENSMUSG00000074345	Tnfaip8l3	Common down (Quadrant 3)
ENSMUSG00000023992	Trem2	Common down (Quadrant 3)
ENSMUSG00000042985	Upk3b	Common down (Quadrant 3)
ENSMUSG00000036856	Wnt4	Common down (Quadrant 3)
ENSMUSG00000027514	Zbp1	Common down (Quadrant 3)
ENSMUSG00000048485	Zbtb8b	Common down (Quadrant 3)
ENSMUSG00000040829	Zmynd15	Common down (Quadrant 3)
ENSMUSG00000032401	Lctl	OV_up AV_down (Quadrant 4)

## Sheet: OS vs CS & AS vs CS common DEGs
gene_id	gene_name	type	Corresponding to figure S7C
ENSMUSG00000042041	2010003K11Rik	Common up (Quadrant 1)
ENSMUSG00000044906	4930503L19Rik	Common up (Quadrant 1)
ENSMUSG00000103149	AA914427	Common up (Quadrant 1)
ENSMUSG00000025085	Ablim1	Common up (Quadrant 1)
ENSMUSG00000020532	Acaca	Common up (Quadrant 1)
ENSMUSG00000042010	Acacb	Common up (Quadrant 1)
ENSMUSG00000001588	Acap1	Common up (Quadrant 1)
ENSMUSG00000023832	Acat2	Common up (Quadrant 1)
ENSMUSG00000030935	Acsm3	Common up (Quadrant 1)
ENSMUSG00000027605	Acss2	Common up (Quadrant 1)
ENSMUSG00000026567	Adcy10	Common up (Quadrant 1)
ENSMUSG00000026922	Agpat2	Common up (Quadrant 1)
ENSMUSG00000021057	Akap5	Common up (Quadrant 1)
ENSMUSG00000037999	Arap2	Common up (Quadrant 1)
ENSMUSG00000036452	Arhgap26	Common up (Quadrant 1)
ENSMUSG00000037686	Aspg	Common up (Quadrant 1)
ENSMUSG00000032412	Atp1b3	Common up (Quadrant 1)
ENSMUSG00000037685	Atp8a1	Common up (Quadrant 1)
ENSMUSG00000037458	Azin1	Common up (Quadrant 1)
ENSMUSG00000022686	B3gnt5	Common up (Quadrant 1)
ENSMUSG00000084957	Bbip1	Common up (Quadrant 1)
ENSMUSG00000059588	Calcrl	Common up (Quadrant 1)
ENSMUSG00000001175	Calm1	Common up (Quadrant 1)
ENSMUSG00000029084	Cd38	Common up (Quadrant 1)
ENSMUSG00000053977	Cd8a	Common up (Quadrant 1)
ENSMUSG00000024526	Cidea	Common up (Quadrant 1)
ENSMUSG00000033082	Clec1a	Common up (Quadrant 1)
ENSMUSG00000020589	Cyria	Common up (Quadrant 1)
ENSMUSG00000030313	Dennd5b	Common up (Quadrant 1)
ENSMUSG00000070738	Dgkd	Common up (Quadrant 1)
ENSMUSG00000030104	Edem1	Common up (Quadrant 1)
ENSMUSG00000041220	Elovl6	Common up (Quadrant 1)
ENSMUSG00000063524	Eno1	Common up (Quadrant 1)
ENSMUSG00000021236	Entpd5	Common up (Quadrant 1)
ENSMUSG00000032035	Ets1	Common up (Quadrant 1)
ENSMUSG00000027533	Fabp5	Common up (Quadrant 1)
ENSMUSG00000025153	Fasn	Common up (Quadrant 1)
ENSMUSG00000022707	Gbe1	Common up (Quadrant 1)
ENSMUSG00000058624	Gda	Common up (Quadrant 1)
ENSMUSG00000021218	Gdi2	Common up (Quadrant 1)
ENSMUSG00000039264	Gimap3	Common up (Quadrant 1)
ENSMUSG00000054435	Gimap4	Common up (Quadrant 1)
ENSMUSG00000047867	Gimap6	Common up (Quadrant 1)
ENSMUSG00000102329	Gm10851	Common up (Quadrant 1)
ENSMUSG00000111942	Gm5182	Common up (Quadrant 1)
ENSMUSG00000035311	Gnptab	Common up (Quadrant 1)
ENSMUSG00000027346	Gpcpd1	Common up (Quadrant 1)
ENSMUSG00000040111	Gramd1b	Common up (Quadrant 1)
ENSMUSG00000020962	Gtf2a1	Common up (Quadrant 1)
ENSMUSG00000067235	H2-Q10	Common up (Quadrant 1)
ENSMUSG00000079555	Haus3	Common up (Quadrant 1)
ENSMUSG00000031770	Herpud1	Common up (Quadrant 1)
ENSMUSG00000034987	Hrh2	Common up (Quadrant 1)
ENSMUSG00000001029	Icam2	Common up (Quadrant 1)
ENSMUSG00000058258	Idi1	Common up (Quadrant 1)
ENSMUSG00000095079	Igha	Common up (Quadrant 1)
ENSMUSG00000104213	Ighd	Common up (Quadrant 1)
ENSMUSG00000076613	Ighg2b	Common up (Quadrant 1)
ENSMUSG00000076615	Ighg3	Common up (Quadrant 1)
ENSMUSG00000094694	Ighv1-9	Common up (Quadrant 1)
ENSMUSG00000076609	Igkc	Common up (Quadrant 1)
ENSMUSG00000094420	Igkv10-96	Common up (Quadrant 1)
ENSMUSG00000037940	Inpp4b	Common up (Quadrant 1)
ENSMUSG00000045294	Insig1	Common up (Quadrant 1)
ENSMUSG00000067149	Jchain	Common up (Quadrant 1)
ENSMUSG00000040724	Kcna2	Common up (Quadrant 1)
ENSMUSG00000062609	Kcnj15	Common up (Quadrant 1)
ENSMUSG00000025597	Klhl4	Common up (Quadrant 1)
ENSMUSG00000054720	Lrrc8c	Common up (Quadrant 1)
ENSMUSG00000032418	Me1	Common up (Quadrant 1)
ENSMUSG00000074604	Mgst2	Common up (Quadrant 1)
ENSMUSG00000042444	Mindy2	Common up (Quadrant 1)
ENSMUSG00000023861	Mpc1	Common up (Quadrant 1)
ENSMUSG00000050276	Mrgprg	Common up (Quadrant 1)
ENSMUSG00000056290	Ms4a4b	Common up (Quadrant 1)
ENSMUSG00000031604	Msmo1	Common up (Quadrant 1)
ENSMUSG00000064354	mt-Co2	Common up (Quadrant 1)
ENSMUSG00000064360	mt-Nd3	Common up (Quadrant 1)
ENSMUSG00000064361	mt-Tr	Common up (Quadrant 1)
ENSMUSG00000001156	Mxd1	Common up (Quadrant 1)
ENSMUSG00000002341	Ncan	Common up (Quadrant 1)
ENSMUSG00000056234	Ncoa4	Common up (Quadrant 1)
ENSMUSG00000028261	Ndufaf4	Common up (Quadrant 1)
ENSMUSG00000006784	Odad4	Common up (Quadrant 1)
ENSMUSG00000020189	Osbpl8	Common up (Quadrant 1)
ENSMUSG00000034981	Parm1	Common up (Quadrant 1)
ENSMUSG00000027835	Pdcd10	Common up (Quadrant 1)
ENSMUSG00000006494	Pdk1	Common up (Quadrant 1)
ENSMUSG00000030214	Plbd1	Common up (Quadrant 1)
ENSMUSG00000049969	Plekhf2	Common up (Quadrant 1)
ENSMUSG00000035834	Polr3g	Common up (Quadrant 1)
ENSMUSG00000028636	Ppcs	Common up (Quadrant 1)
ENSMUSG00000046794	Ppp1r3b	Common up (Quadrant 1)
ENSMUSG00000021650	Ptcd2	Common up (Quadrant 1)
ENSMUSG00000028149	Rap1gds1	Common up (Quadrant 1)
ENSMUSG00000032946	Rasgrp2	Common up (Quadrant 1)
ENSMUSG00000071042	Rasgrp3	Common up (Quadrant 1)
ENSMUSG00000029449	Rhof	Common up (Quadrant 1)
ENSMUSG00000035367	Rmi1	Common up (Quadrant 1)
ENSMUSG00000019763	Rmnd1	Common up (Quadrant 1)
ENSMUSG00000021180	Rps6ka5	Common up (Quadrant 1)
ENSMUSG00000064373	Selenop	Common up (Quadrant 1)
ENSMUSG00000027808	Serp1	Common up (Quadrant 1)
ENSMUSG00000025915	Sgk3	Common up (Quadrant 1)
ENSMUSG00000005057	Sh2b2	Common up (Quadrant 1)
ENSMUSG00000040990	Sh3kbp1	Common up (Quadrant 1)
ENSMUSG00000017756	Slc12a7	Common up (Quadrant 1)
ENSMUSG00000003528	Slc25a1	Common up (Quadrant 1)
ENSMUSG00000027219	Slc28a2	Common up (Quadrant 1)
ENSMUSG00000031906	Smpd3	Common up (Quadrant 1)
ENSMUSG00000029093	Sorcs2	Common up (Quadrant 1)
ENSMUSG00000049313	Sorl1	Common up (Quadrant 1)
ENSMUSG00000020077	Srgn	Common up (Quadrant 1)
ENSMUSG00000040710	St8sia4	Common up (Quadrant 1)
ENSMUSG00000009097	Tbx1	Common up (Quadrant 1)
ENSMUSG00000022797	Tfrc	Common up (Quadrant 1)
ENSMUSG00000079659	Tmem243	Common up (Quadrant 1)
ENSMUSG00000026723	Trdmt1	Common up (Quadrant 1)
ENSMUSG00000020601	Trib2	Common up (Quadrant 1)
ENSMUSG00000067369	Trmt2b	Common up (Quadrant 1)
ENSMUSG00000026667	Uhmk1	Common up (Quadrant 1)
ENSMUSG00000046844	Vat1l	Common up (Quadrant 1)
ENSMUSG00000083327	Vcp-rs	Common up (Quadrant 1)
ENSMUSG00000046230	Vps13a	Common up (Quadrant 1)
ENSMUSG00000007950	Abhd8	AS_up OS_down (Quadrant 2)
ENSMUSG00000032724	Abtb2	AS_up OS_down (Quadrant 2)
ENSMUSG00000037138	Aff3	AS_up OS_down (Quadrant 2)
ENSMUSG00000018924	Alox15	AS_up OS_down (Quadrant 2)
ENSMUSG00000026786	Apbb1ip	AS_up OS_down (Quadrant 2)
ENSMUSG00000040613	Apobec1	AS_up OS_down (Quadrant 2)
ENSMUSG00000037447	Arid5a	AS_up OS_down (Quadrant 2)
ENSMUSG00000049866	Arl4c	AS_up OS_down (Quadrant 2)
ENSMUSG00000006731	B4galnt1	AS_up OS_down (Quadrant 2)
ENSMUSG00000017929	B4galt5	AS_up OS_down (Quadrant 2)
ENSMUSG00000028545	Bend5	AS_up OS_down (Quadrant 2)
ENSMUSG00000003352	Cacnb3	AS_up OS_down (Quadrant 2)
ENSMUSG00000036526	Card11	AS_up OS_down (Quadrant 2)
ENSMUSG00000009185	Ccl8	AS_up OS_down (Quadrant 2)
ENSMUSG00000044811	Cd300c2	AS_up OS_down (Quadrant 2)
ENSMUSG00000018774	Cd68	AS_up OS_down (Quadrant 2)
ENSMUSG00000024610	Cd74	AS_up OS_down (Quadrant 2)
ENSMUSG00000046722	Cdc42se1	AS_up OS_down (Quadrant 2)
ENSMUSG00000037443	Cep85	AS_up OS_down (Quadrant 2)
ENSMUSG00000001128	Cfp	AS_up OS_down (Quadrant 2)
ENSMUSG00000007041	Clic1	AS_up OS_down (Quadrant 2)
ENSMUSG00000022037	Clu	AS_up OS_down (Quadrant 2)
ENSMUSG00000004665	Cnn2	AS_up OS_down (Quadrant 2)
ENSMUSG00000032572	Col6a4	AS_up OS_down (Quadrant 2)
ENSMUSG00000031827	Cotl1	AS_up OS_down (Quadrant 2)
ENSMUSG00000004552	Ctse	AS_up OS_down (Quadrant 2)
ENSMUSG00000032359	Ctsh	AS_up OS_down (Quadrant 2)
ENSMUSG00000038642	Ctss	AS_up OS_down (Quadrant 2)
ENSMUSG00000052336	Cx3cr1	AS_up OS_down (Quadrant 2)
ENSMUSG00000006519	Cyba	AS_up OS_down (Quadrant 2)
ENSMUSG00000018008	Cyth4	AS_up OS_down (Quadrant 2)
ENSMUSG00000026832	Cytip	AS_up OS_down (Quadrant 2)
ENSMUSG00000024456	Diaph1	AS_up OS_down (Quadrant 2)
ENSMUSG00000025279	Dnase1l3	AS_up OS_down (Quadrant 2)
ENSMUSG00000004099	Dnmt1	AS_up OS_down (Quadrant 2)
ENSMUSG00000033730	Egr3	AS_up OS_down (Quadrant 2)
ENSMUSG00000043439	Epop	AS_up OS_down (Quadrant 2)
ENSMUSG00000041559	Fmod	AS_up OS_down (Quadrant 2)
ENSMUSG00000069682	Gm10275	AS_up OS_down (Quadrant 2)
ENSMUSG00000110631	Gm42047	AS_up OS_down (Quadrant 2)
ENSMUSG00000034792	Gna15	AS_up OS_down (Quadrant 2)
ENSMUSG00000034786	Gpsm3	AS_up OS_down (Quadrant 2)
ENSMUSG00000073421	H2-Ab1	AS_up OS_down (Quadrant 2)
ENSMUSG00000060586	H2-Eb1	AS_up OS_down (Quadrant 2)
ENSMUSG00000016283	H2-M2	AS_up OS_down (Quadrant 2)
ENSMUSG00000003283	Hck	AS_up OS_down (Quadrant 2)
ENSMUSG00000046711	Hmga1	AS_up OS_down (Quadrant 2)
ENSMUSG00000054717	Hmgb2	AS_up OS_down (Quadrant 2)
ENSMUSG00000037405	Icam1	AS_up OS_down (Quadrant 2)
ENSMUSG00000073491	Ifi213	AS_up OS_down (Quadrant 2)
ENSMUSG00000002897	Il17ra	AS_up OS_down (Quadrant 2)
ENSMUSG00000041515	Irf8	AS_up OS_down (Quadrant 2)
ENSMUSG00000042644	Itpr3	AS_up OS_down (Quadrant 2)
ENSMUSG00000021998	Lcp1	AS_up OS_down (Quadrant 2)
ENSMUSG00000040699	Limd2	AS_up OS_down (Quadrant 2)
ENSMUSG00000018819	Lsp1	AS_up OS_down (Quadrant 2)
ENSMUSG00000042724	Map3k9	AS_up OS_down (Quadrant 2)
ENSMUSG00000047945	Marcksl1	AS_up OS_down (Quadrant 2)
ENSMUSG00000026355	Mcm6	AS_up OS_down (Quadrant 2)
ENSMUSG00000058006	Mdn1	AS_up OS_down (Quadrant 2)
ENSMUSG00000046805	Mpeg1	AS_up OS_down (Quadrant 2)
ENSMUSG00000039395	Mreg	AS_up OS_down (Quadrant 2)
ENSMUSG00000042292	Mrtfa	AS_up OS_down (Quadrant 2)
ENSMUSG00000024675	Ms4a4c	AS_up OS_down (Quadrant 2)
ENSMUSG00000079419	Ms4a6c	AS_up OS_down (Quadrant 2)
ENSMUSG00000032220	Myo1e	AS_up OS_down (Quadrant 2)
ENSMUSG00000024300	Myo1f	AS_up OS_down (Quadrant 2)
ENSMUSG00000004677	Myo9b	AS_up OS_down (Quadrant 2)
ENSMUSG00000025225	Nfkb2	AS_up OS_down (Quadrant 2)
ENSMUSG00000028803	Nipal3	AS_up OS_down (Quadrant 2)
ENSMUSG00000009772	Nuak2	AS_up OS_down (Quadrant 2)
ENSMUSG00000030091	Nup210	AS_up OS_down (Quadrant 2)
ENSMUSG00000036381	P2ry14	AS_up OS_down (Quadrant 2)
ENSMUSG00000025017	Pik3ap1	AS_up OS_down (Quadrant 2)
ENSMUSG00000058818	Pirb	AS_up OS_down (Quadrant 2)
ENSMUSG00000041202	Pla2g2d	AS_up OS_down (Quadrant 2)
ENSMUSG00000029322	Plac8	AS_up OS_down (Quadrant 2)
ENSMUSG00000051413	Plagl2	AS_up OS_down (Quadrant 2)
ENSMUSG00000034330	Plcg2	AS_up OS_down (Quadrant 2)
ENSMUSG00000050721	Plekho2	AS_up OS_down (Quadrant 2)
ENSMUSG00000036986	Pml	AS_up OS_down (Quadrant 2)
ENSMUSG00000039621	Prex1	AS_up OS_down (Quadrant 2)
ENSMUSG00000021948	Prkcd	AS_up OS_down (Quadrant 2)
ENSMUSG00000027540	Ptpn1	AS_up OS_down (Quadrant 2)
ENSMUSG00000034573	Ptpn13	AS_up OS_down (Quadrant 2)
ENSMUSG00000004266	Ptpn6	AS_up OS_down (Quadrant 2)
ENSMUSG00000017639	Rab11fip4	AS_up OS_down (Quadrant 2)
ENSMUSG00000020372	Rack1	AS_up OS_down (Quadrant 2)
ENSMUSG00000026594	Ralgps2	AS_up OS_down (Quadrant 2)
ENSMUSG00000029602	Rasal1	AS_up OS_down (Quadrant 2)
ENSMUSG00000045128	Rpl18a	AS_up OS_down (Quadrant 2)
ENSMUSG00000032399	Rpl4	AS_up OS_down (Quadrant 2)
ENSMUSG00000067274	Rplp0	AS_up OS_down (Quadrant 2)
ENSMUSG00000090862	Rps13	AS_up OS_down (Quadrant 2)
ENSMUSG00000028234	Rps20	AS_up OS_down (Quadrant 2)
ENSMUSG00000030744	Rps3	AS_up OS_down (Quadrant 2)
ENSMUSG00000003644	Rps6ka1	AS_up OS_down (Quadrant 2)
ENSMUSG00000027639	Samhd1	AS_up OS_down (Quadrant 2)
ENSMUSG00000044770	Scml4	AS_up OS_down (Quadrant 2)
ENSMUSG00000025743	Sdc3	AS_up OS_down (Quadrant 2)
ENSMUSG00000022769	Sdf2l1	AS_up OS_down (Quadrant 2)
ENSMUSG00000021451	Sema4d	AS_up OS_down (Quadrant 2)
ENSMUSG00000000627	Sema4f	AS_up OS_down (Quadrant 2)
ENSMUSG00000028843	Sh3bgrl3	AS_up OS_down (Quadrant 2)
ENSMUSG00000054520	Sh3bp2	AS_up OS_down (Quadrant 2)
ENSMUSG00000022696	Sidt1	AS_up OS_down (Quadrant 2)
ENSMUSG00000027322	Siglec1	AS_up OS_down (Quadrant 2)
ENSMUSG00000055717	Slain1	AS_up OS_down (Quadrant 2)
ENSMUSG00000045775	Slc16a5	AS_up OS_down (Quadrant 2)
ENSMUSG00000003153	Slc2a3	AS_up OS_down (Quadrant 2)
ENSMUSG00000023169	Slc38a1	AS_up OS_down (Quadrant 2)
ENSMUSG00000040010	Slc7a5	AS_up OS_down (Quadrant 2)
ENSMUSG00000078763	Slfn1	AS_up OS_down (Quadrant 2)
ENSMUSG00000072620	Slfn2	AS_up OS_down (Quadrant 2)
ENSMUSG00000000204	Slfn4	AS_up OS_down (Quadrant 2)
ENSMUSG00000017002	Slpi	AS_up OS_down (Quadrant 2)
ENSMUSG00000026600	Soat1	AS_up OS_down (Quadrant 2)
ENSMUSG00000038037	Socs1	AS_up OS_down (Quadrant 2)
ENSMUSG00000070034	Sp110	AS_up OS_down (Quadrant 2)
ENSMUSG00000002111	Spi1	AS_up OS_down (Quadrant 2)
ENSMUSG00000048277	Syngr2	AS_up OS_down (Quadrant 2)
ENSMUSG00000061288	Taok3	AS_up OS_down (Quadrant 2)
ENSMUSG00000037321	Tap1	AS_up OS_down (Quadrant 2)
ENSMUSG00000029217	Tec	AS_up OS_down (Quadrant 2)
ENSMUSG00000002489	Tiam1	AS_up OS_down (Quadrant 2)
ENSMUSG00000021277	Traf3	AS_up OS_down (Quadrant 2)
ENSMUSG00000064043	Trerf1	AS_up OS_down (Quadrant 2)
ENSMUSG00000040350	Trim7	AS_up OS_down (Quadrant 2)
ENSMUSG00000030579	Tyrobp	AS_up OS_down (Quadrant 2)
ENSMUSG00000007029	Vars	AS_up OS_down (Quadrant 2)
ENSMUSG00000030403	Vasp	AS_up OS_down (Quadrant 2)
ENSMUSG00000034116	Vav1	AS_up OS_down (Quadrant 2)
ENSMUSG00000040829	Zmynd15	AS_up OS_down (Quadrant 2)
ENSMUSG00000092203	1110038B12Rik	Common down (Quadrant 3)
ENSMUSG00000086390	1810019D21Rik	Common down (Quadrant 3)
ENSMUSG00000028536	2610528J11Rik	Common down (Quadrant 3)
ENSMUSG00000025783	4930412O13Rik	Common down (Quadrant 3)
ENSMUSG00000100627	A830008E24Rik	Common down (Quadrant 3)
ENSMUSG00000057880	Abat	Common down (Quadrant 3)
ENSMUSG00000020865	Abcc3	Common down (Quadrant 3)
ENSMUSG00000085042	Abhd11os	Common down (Quadrant 3)
ENSMUSG00000020681	Ace	Common down (Quadrant 3)
ENSMUSG00000072949	Acot1	Common down (Quadrant 3)
ENSMUSG00000035783	Acta2	Common down (Quadrant 3)
ENSMUSG00000059430	Actg2	Common down (Quadrant 3)
ENSMUSG00000059901	Adamts14	Common down (Quadrant 3)
ENSMUSG00000033453	Adamts15	Common down (Quadrant 3)
ENSMUSG00000053399	Adamts18	Common down (Quadrant 3)
ENSMUSG00000053441	Adamts19	Common down (Quadrant 3)
ENSMUSG00000036545	Adamts2	Common down (Quadrant 3)
ENSMUSG00000043635	Adamts3	Common down (Quadrant 3)
ENSMUSG00000006403	Adamts4	Common down (Quadrant 3)
ENSMUSG00000031994	Adamts8	Common down (Quadrant 3)
ENSMUSG00000066113	Adamtsl1	Common down (Quadrant 3)
ENSMUSG00000022550	Adck5	Common down (Quadrant 3)
ENSMUSG00000005580	Adcy9	Common down (Quadrant 3)
ENSMUSG00000031486	Adgra2	Common down (Quadrant 3)
ENSMUSG00000044017	Adgrd1	Common down (Quadrant 3)
ENSMUSG00000020473	Aebp1	Common down (Quadrant 3)
ENSMUSG00000025083	Afap1l2	Common down (Quadrant 3)
ENSMUSG00000055013	Agap1	Common down (Quadrant 3)
ENSMUSG00000042410	Agps	Common down (Quadrant 3)
ENSMUSG00000041936	Agrn	Common down (Quadrant 3)
ENSMUSG00000031980	Agt	Common down (Quadrant 3)
ENSMUSG00000049115	Agtr1a	Common down (Quadrant 3)
ENSMUSG00000037692	Ahdc1	Common down (Quadrant 3)
ENSMUSG00000118667	Ahnak2	Common down (Quadrant 3)
ENSMUSG00000034382	AI661453	Common down (Quadrant 3)
ENSMUSG00000028527	Ak4	Common down (Quadrant 3)
ENSMUSG00000025955	Akr1cl	Common down (Quadrant 3)
ENSMUSG00000015134	Aldh1a3	Common down (Quadrant 3)
ENSMUSG00000010025	Aldh3a2	Common down (Quadrant 3)
ENSMUSG00000053644	Aldh7a1	Common down (Quadrant 3)
ENSMUSG00000040310	Alx4	Common down (Quadrant 3)
ENSMUSG00000069601	Ank3	Common down (Quadrant 3)
ENSMUSG00000037907	Ankrd13b	Common down (Quadrant 3)
ENSMUSG00000031075	Ano1	Common down (Quadrant 3)
ENSMUSG00000033420	Antxr1	Common down (Quadrant 3)
ENSMUSG00000003309	Ap1m2	Common down (Quadrant 3)
ENSMUSG00000022548	Apod	Common down (Quadrant 3)
ENSMUSG00000057346	Apol9a	Common down (Quadrant 3)
ENSMUSG00000068246	Apol9b	Common down (Quadrant 3)
ENSMUSG00000022892	App	Common down (Quadrant 3)
ENSMUSG00000044217	Aqp5	Common down (Quadrant 3)
ENSMUSG00000021125	Arg2	Common down (Quadrant 3)
ENSMUSG00000074625	Arhgap40	Common down (Quadrant 3)
ENSMUSG00000050730	Arhgap42	Common down (Quadrant 3)
ENSMUSG00000033389	Arhgap44	Common down (Quadrant 3)
ENSMUSG00000078954	Arhgap8	Common down (Quadrant 3)
ENSMUSG00000040964	Arhgef10l	Common down (Quadrant 3)
ENSMUSG00000029032	Arhgef16	Common down (Quadrant 3)
ENSMUSG00000032875	Arhgef17	Common down (Quadrant 3)
ENSMUSG00000028919	Arhgef19	Common down (Quadrant 3)
ENSMUSG00000019467	Arhgef25	Common down (Quadrant 3)
ENSMUSG00000040969	Arhgef38	Common down (Quadrant 3)
ENSMUSG00000033542	Arhgef5	Common down (Quadrant 3)
ENSMUSG00000033436	Armcx2	Common down (Quadrant 3)
ENSMUSG00000039043	Arpin	Common down (Quadrant 3)
ENSMUSG00000018909	Arrb1	Common down (Quadrant 3)
ENSMUSG00000118669	Arvcf	Common down (Quadrant 3)
ENSMUSG00000038204	Asb10	Common down (Quadrant 3)
ENSMUSG00000026628	Atf3	Common down (Quadrant 3)
ENSMUSG00000022533	Atp13a3	Common down (Quadrant 3)
ENSMUSG00000006567	Atp7b	Common down (Quadrant 3)
ENSMUSG00000038112	AW551984	Common down (Quadrant 3)
ENSMUSG00000118642	AY036118	Common down (Quadrant 3)
ENSMUSG00000028541	B4galt2	Common down (Quadrant 3)
ENSMUSG00000038859	Baiap2l1	Common down (Quadrant 3)
ENSMUSG00000033722	BC034090	Common down (Quadrant 3)
ENSMUSG00000002980	Bcam	Common down (Quadrant 3)
ENSMUSG00000030814	Bcl7c	Common down (Quadrant 3)
ENSMUSG00000063382	Bcl9l	Common down (Quadrant 3)
ENSMUSG00000048482	Bdnf	Common down (Quadrant 3)
ENSMUSG00000040867	Begain	Common down (Quadrant 3)
ENSMUSG00000046432	Bex3	Common down (Quadrant 3)
ENSMUSG00000030256	Bhlhe41	Common down (Quadrant 3)
ENSMUSG00000014329	Bicc1	Common down (Quadrant 3)
ENSMUSG00000043782	Bicdl2	Common down (Quadrant 3)
ENSMUSG00000016758	Bik	Common down (Quadrant 3)
ENSMUSG00000022098	Bmp1	Common down (Quadrant 3)
ENSMUSG00000008999	Bmp7	Common down (Quadrant 3)
ENSMUSG00000031963	Bmper	Common down (Quadrant 3)
ENSMUSG00000028115	Bnipl	Common down (Quadrant 3)
ENSMUSG00000022687	Boc	Common down (Quadrant 3)
ENSMUSG00000035131	Brinp3	Common down (Quadrant 3)
ENSMUSG00000028392	Bspry	Common down (Quadrant 3)
ENSMUSG00000052951	C130021I20Rik	Common down (Quadrant 3)
ENSMUSG00000055172	C1ra	Common down (Quadrant 3)
ENSMUSG00000050390	C77080	Common down (Quadrant 3)
ENSMUSG00000020866	Cacna1g	Common down (Quadrant 3)
ENSMUSG00000030669	Calca	Common down (Quadrant 3)
ENSMUSG00000046447	Camk2n1	Common down (Quadrant 3)
ENSMUSG00000044433	Camsap3	Common down (Quadrant 3)
ENSMUSG00000035547	Capn5	Common down (Quadrant 3)
ENSMUSG00000067276	Capn6	Common down (Quadrant 3)
ENSMUSG00000039676	Capsl	Common down (Quadrant 3)
ENSMUSG00000028977	Casz1	Common down (Quadrant 3)
ENSMUSG00000035640	Cbarp	Common down (Quadrant 3)
ENSMUSG00000040525	Cblc	Common down (Quadrant 3)
ENSMUSG00000089715	Cbx6	Common down (Quadrant 3)
ENSMUSG00000063605	Ccdc102a	Common down (Quadrant 3)
ENSMUSG00000031150	Ccdc120	Common down (Quadrant 3)
ENSMUSG00000029769	Ccdc136	Common down (Quadrant 3)
ENSMUSG00000044033	Ccdc141	Common down (Quadrant 3)
ENSMUSG00000075225	Ccdc162	Common down (Quadrant 3)
ENSMUSG00000041117	Ccdc8	Common down (Quadrant 3)
ENSMUSG00000084883	Ccdc85c	Common down (Quadrant 3)
ENSMUSG00000019997	Ccn2	Common down (Quadrant 3)
ENSMUSG00000005124	Ccn4	Common down (Quadrant 3)
ENSMUSG00000019818	Cd164	Common down (Quadrant 3)
ENSMUSG00000028865	Cd164l2	Common down (Quadrant 3)
ENSMUSG00000022661	Cd200	Common down (Quadrant 3)
ENSMUSG00000051906	Cd209f	Common down (Quadrant 3)
ENSMUSG00000056481	Cd248	Common down (Quadrant 3)
ENSMUSG00000035914	Cd276	Common down (Quadrant 3)
ENSMUSG00000030342	Cd9	Common down (Quadrant 3)
ENSMUSG00000024769	Cdc42bpg	Common down (Quadrant 3)
ENSMUSG00000041598	Cdc42ep4	Common down (Quadrant 3)
ENSMUSG00000035498	Cdcp1	Common down (Quadrant 3)
ENSMUSG00000006204	Cdcp3	Common down (Quadrant 3)
ENSMUSG00000000303	Cdh1	Common down (Quadrant 3)
ENSMUSG00000031673	Cdh11	Common down (Quadrant 3)
ENSMUSG00000061048	Cdh3	Common down (Quadrant 3)
ENSMUSG00000026437	Cdk18	Common down (Quadrant 3)
ENSMUSG00000038481	Cdk19	Common down (Quadrant 3)
ENSMUSG00000038119	Cdon	Common down (Quadrant 3)
ENSMUSG00000050910	Cdr2l	Common down (Quadrant 3)
ENSMUSG00000024754	Cemip2	Common down (Quadrant 3)
ENSMUSG00000072825	Cep170b	Common down (Quadrant 3)
ENSMUSG00000068876	Cgn	Common down (Quadrant 3)
ENSMUSG00000063765	Chadl	Common down (Quadrant 3)
ENSMUSG00000027536	Chmp4c	Common down (Quadrant 3)
ENSMUSG00000045613	Chrm2	Common down (Quadrant 3)
ENSMUSG00000032578	Cish	Common down (Quadrant 3)
ENSMUSG00000047501	Cldn4	Common down (Quadrant 3)
ENSMUSG00000023906	Cldn6	Common down (Quadrant 3)
ENSMUSG00000018569	Cldn7	Common down (Quadrant 3)
ENSMUSG00000050520	Cldn8	Common down (Quadrant 3)
ENSMUSG00000025784	Clec3b	Common down (Quadrant 3)
ENSMUSG00000024059	Clip4	Common down (Quadrant 3)
ENSMUSG00000039953	Clstn1	Common down (Quadrant 3)
ENSMUSG00000031875	Cmtm3	Common down (Quadrant 3)
ENSMUSG00000028841	Cnksr1	Common down (Quadrant 3)
ENSMUSG00000001349	Cnn1	Common down (Quadrant 3)
ENSMUSG00000053931	Cnn3	Common down (Quadrant 3)
ENSMUSG00000028444	Cntfr	Common down (Quadrant 3)
ENSMUSG00000053024	Cntn2	Common down (Quadrant 3)
ENSMUSG00000020173	Cobl	Common down (Quadrant 3)
ENSMUSG00000058806	Col13a1	Common down (Quadrant 3)
ENSMUSG00000040690	Col16a1	Common down (Quadrant 3)
ENSMUSG00000001435	Col18a1	Common down (Quadrant 3)
ENSMUSG00000001506	Col1a1	Common down (Quadrant 3)
ENSMUSG00000029661	Col1a2	Common down (Quadrant 3)
ENSMUSG00000031274	Col4a5	Common down (Quadrant 3)
ENSMUSG00000031273	Col4a6	Common down (Quadrant 3)
ENSMUSG00000026837	Col5a1	Common down (Quadrant 3)
ENSMUSG00000026042	Col5a2	Common down (Quadrant 3)
ENSMUSG00000001119	Col6a1	Common down (Quadrant 3)
ENSMUSG00000025650	Col7a1	Common down (Quadrant 3)
ENSMUSG00000056174	Col8a2	Common down (Quadrant 3)
ENSMUSG00000028626	Col9a2	Common down (Quadrant 3)
ENSMUSG00000027570	Col9a3	Common down (Quadrant 3)
ENSMUSG00000027408	Cpxm1	Common down (Quadrant 3)
ENSMUSG00000036596	Cpz	Common down (Quadrant 3)
ENSMUSG00000026090	Cracdl	Common down (Quadrant 3)
ENSMUSG00000048200	Cracr2b	Common down (Quadrant 3)
ENSMUSG00000044279	Crb3	Common down (Quadrant 3)
ENSMUSG00000027230	Creb3l1	Common down (Quadrant 3)
ENSMUSG00000038648	Creb3l2	Common down (Quadrant 3)
ENSMUSG00000025776	Crispld1	Common down (Quadrant 3)
ENSMUSG00000042109	Csdc2	Common down (Quadrant 3)
ENSMUSG00000014599	Csf1	Common down (Quadrant 3)
ENSMUSG00000026421	Csrp1	Common down (Quadrant 3)
ENSMUSG00000020186	Csrp2	Common down (Quadrant 3)
ENSMUSG00000054196	Cthrc1	Common down (Quadrant 3)
ENSMUSG00000022240	Ctnnd2	Common down (Quadrant 3)
ENSMUSG00000005609	Ctr9	Common down (Quadrant 3)
ENSMUSG00000055298	Ctsj	Common down (Quadrant 3)
ENSMUSG00000028111	Ctsk	Common down (Quadrant 3)
ENSMUSG00000055679	Ctsr	Common down (Quadrant 3)
ENSMUSG00000031078	Cttn	Common down (Quadrant 3)
ENSMUSG00000048644	Ctxn1	Common down (Quadrant 3)
ENSMUSG00000018378	Cuedc1	Common down (Quadrant 3)
ENSMUSG00000026870	Cutal	Common down (Quadrant 3)
ENSMUSG00000031778	Cx3cl1	Common down (Quadrant 3)
ENSMUSG00000022865	Cxadr	Common down (Quadrant 3)
ENSMUSG00000021508	Cxcl14	Common down (Quadrant 3)
ENSMUSG00000029375	Cxcl15	Common down (Quadrant 3)
ENSMUSG00000046668	Cxxc5	Common down (Quadrant 3)
ENSMUSG00000019590	Cyb561	Common down (Quadrant 3)
ENSMUSG00000023963	Cyp39a1	Common down (Quadrant 3)
ENSMUSG00000070419	Cyp3a57	Common down (Quadrant 3)
ENSMUSG00000073424	Cyp4f15	Common down (Quadrant 3)
ENSMUSG00000046727	Cystm1	Common down (Quadrant 3)
ENSMUSG00000052117	D630039A03Rik	Common down (Quadrant 3)
ENSMUSG00000063455	D630045J12Rik	Common down (Quadrant 3)
ENSMUSG00000021559	Dapk1	Common down (Quadrant 3)
ENSMUSG00000034675	Dbn1	Common down (Quadrant 3)
ENSMUSG00000102692	Dchs2	Common down (Quadrant 3)
ENSMUSG00000019929	Dcn	Common down (Quadrant 3)
ENSMUSG00000007039	Ddah2	Common down (Quadrant 3)
ENSMUSG00000003534	Ddr1	Common down (Quadrant 3)
ENSMUSG00000038665	Dgki	Common down (Quadrant 3)
ENSMUSG00000047992	Dipk1c	Common down (Quadrant 3)
ENSMUSG00000030772	Dkk3	Common down (Quadrant 3)
ENSMUSG00000030792	Dkkl1	Common down (Quadrant 3)
ENSMUSG00000000881	Dlg3	Common down (Quadrant 3)
ENSMUSG00000020886	Dlg4	Common down (Quadrant 3)
ENSMUSG00000021782	Dlg5	Common down (Quadrant 3)
ENSMUSG00000047517	Dmbt1	Common down (Quadrant 3)
ENSMUSG00000036764	Dnajc12	Common down (Quadrant 3)
ENSMUSG00000026825	Dnm1	Common down (Quadrant 3)
ENSMUSG00000020848	Doc2b	Common down (Quadrant 3)
ENSMUSG00000024501	Dpysl3	Common down (Quadrant 3)
ENSMUSG00000054889	Dsp	Common down (Quadrant 3)
ENSMUSG00000024302	Dtna	Common down (Quadrant 3)
ENSMUSG00000039982	Dtx4	Common down (Quadrant 3)
ENSMUSG00000030203	Dusp16	Common down (Quadrant 3)
ENSMUSG00000031530	Dusp4	Common down (Quadrant 3)
ENSMUSG00000028108	Ecm1	Common down (Quadrant 3)
ENSMUSG00000026051	Ecrg4	Common down (Quadrant 3)
ENSMUSG00000003227	Edar	Common down (Quadrant 3)
ENSMUSG00000024909	Efemp2	Common down (Quadrant 3)
ENSMUSG00000028040	Efna4	Common down (Quadrant 3)
ENSMUSG00000022203	Efs	Common down (Quadrant 3)
ENSMUSG00000020122	Egfr	Common down (Quadrant 3)
ENSMUSG00000012350	Ehf	Common down (Quadrant 3)
ENSMUSG00000040412	Elapor1	Common down (Quadrant 3)
ENSMUSG00000003051	Elf3	Common down (Quadrant 3)
ENSMUSG00000021696	Elovl7	Common down (Quadrant 3)
ENSMUSG00000024053	Emilin2	Common down (Quadrant 3)
ENSMUSG00000058070	Eml1	Common down (Quadrant 3)
ENSMUSG00000040811	Eml2	Common down (Quadrant 3)
ENSMUSG00000022505	Emp2	Common down (Quadrant 3)
ENSMUSG00000022995	Enah	Common down (Quadrant 3)
ENSMUSG00000028445	Enho	Common down (Quadrant 3)
ENSMUSG00000041608	Entpd3	Common down (Quadrant 3)
ENSMUSG00000028434	Epb41l4b	Common down (Quadrant 3)
ENSMUSG00000045394	Epcam	Common down (Quadrant 3)
ENSMUSG00000029859	Epha1	Common down (Quadrant 3)
ENSMUSG00000026235	Epha4	Common down (Quadrant 3)
ENSMUSG00000028289	Epha7	Common down (Quadrant 3)
ENSMUSG00000005958	Ephb3	Common down (Quadrant 3)
ENSMUSG00000029869	Ephb6	Common down (Quadrant 3)
ENSMUSG00000010080	Epn3	Common down (Quadrant 3)
ENSMUSG00000118671	Eppk1	Common down (Quadrant 3)
ENSMUSG00000019936	Epyc	Common down (Quadrant 3)
ENSMUSG00000062312	Erbb2	Common down (Quadrant 3)
ENSMUSG00000018166	Erbb3	Common down (Quadrant 3)
ENSMUSG00000040857	Erf	Common down (Quadrant 3)
ENSMUSG00000020715	Ern1	Common down (Quadrant 3)
ENSMUSG00000040728	Esrp1	Common down (Quadrant 3)
ENSMUSG00000084128	Esrp2	Common down (Quadrant 3)
ENSMUSG00000021255	Esrrb	Common down (Quadrant 3)
ENSMUSG00000037681	Esyt3	Common down (Quadrant 3)
ENSMUSG00000022895	Ets2	Common down (Quadrant 3)
ENSMUSG00000017724	Etv4	Common down (Quadrant 3)
ENSMUSG00000029122	Evc	Common down (Quadrant 3)
ENSMUSG00000050248	Evc2	Common down (Quadrant 3)
ENSMUSG00000034282	Evpl	Common down (Quadrant 3)
ENSMUSG00000017897	Eya2	Common down (Quadrant 3)
ENSMUSG00000010461	Eya4	Common down (Quadrant 3)
ENSMUSG00000090942	F830016B08Rik	Common down (Quadrant 3)
ENSMUSG00000028773	Fabp3	Common down (Quadrant 3)
ENSMUSG00000044788	Fads6	Common down (Quadrant 3)
ENSMUSG00000023011	Faim2	Common down (Quadrant 3)
ENSMUSG00000027459	Fam110a	Common down (Quadrant 3)
ENSMUSG00000049119	Fam110b	Common down (Quadrant 3)
ENSMUSG00000051000	Fam160a1	Common down (Quadrant 3)
ENSMUSG00000034685	Fam171a2	Common down (Quadrant 3)
ENSMUSG00000020614	Fam20a	Common down (Quadrant 3)
ENSMUSG00000020083	Fam241b	Common down (Quadrant 3)
ENSMUSG00000032358	Fam83b	Common down (Quadrant 3)
ENSMUSG00000054161	Fam83e	Common down (Quadrant 3)
ENSMUSG00000046761	Fam83h	Common down (Quadrant 3)
ENSMUSG00000070047	Fat1	Common down (Quadrant 3)
ENSMUSG00000055333	Fat2	Common down (Quadrant 3)
ENSMUSG00000020776	Fbf1	Common down (Quadrant 3)
ENSMUSG00000064080	Fbln2	Common down (Quadrant 3)
ENSMUSG00000027386	Fbln7	Common down (Quadrant 3)
ENSMUSG00000030811	Fbxl19	Common down (Quadrant 3)
ENSMUSG00000052934	Fbxo31	Common down (Quadrant 3)
ENSMUSG00000022358	Fbxo32	Common down (Quadrant 3)
ENSMUSG00000037816	Fbxw17	Common down (Quadrant 3)
ENSMUSG00000013338	Fer1l4	Common down (Quadrant 3)
ENSMUSG00000027356	Fermt1	Common down (Quadrant 3)
ENSMUSG00000025265	Fgd1	Common down (Quadrant 3)
ENSMUSG00000030849	Fgfr2	Common down (Quadrant 3)
ENSMUSG00000041842	Fhdc1	Common down (Quadrant 3)
ENSMUSG00000034295	Fhod3	Common down (Quadrant 3)
ENSMUSG00000074971	Fibin	Common down (Quadrant 3)
ENSMUSG00000075012	Fjx1	Common down (Quadrant 3)
ENSMUSG00000001555	Fkbp10	Common down (Quadrant 3)
ENSMUSG00000068699	Flnc	Common down (Quadrant 3)
ENSMUSG00000023911	Flywch2	Common down (Quadrant 3)
ENSMUSG00000026193	Fn1	Common down (Quadrant 3)
ENSMUSG00000021250	Fos	Common down (Quadrant 3)
ENSMUSG00000029135	Fosl2	Common down (Quadrant 3)
ENSMUSG00000035451	Foxa1	Common down (Quadrant 3)
ENSMUSG00000034227	Foxj1	Common down (Quadrant 3)
ENSMUSG00000034687	Fras1	Common down (Quadrant 3)
ENSMUSG00000059049	Frem1	Common down (Quadrant 3)
ENSMUSG00000037016	Frem2	Common down (Quadrant 3)
ENSMUSG00000048285	Frmd6	Common down (Quadrant 3)
ENSMUSG00000035615	Frmpd1	Common down (Quadrant 3)
ENSMUSG00000059412	Fxyd2	Common down (Quadrant 3)
ENSMUSG00000066705	Fxyd6	Common down (Quadrant 3)
ENSMUSG00000044674	Fzd1	Common down (Quadrant 3)
ENSMUSG00000072591	Fzd10os	Common down (Quadrant 3)
ENSMUSG00000050288	Fzd2	Common down (Quadrant 3)
ENSMUSG00000041075	Fzd7	Common down (Quadrant 3)
ENSMUSG00000021453	Gadd45g	Common down (Quadrant 3)
ENSMUSG00000034040	Galnt17	Common down (Quadrant 3)
ENSMUSG00000026994	Galnt3	Common down (Quadrant 3)
ENSMUSG00000052957	Gas1	Common down (Quadrant 3)
ENSMUSG00000034201	Gas2l1	Common down (Quadrant 3)
ENSMUSG00000031451	Gas6	Common down (Quadrant 3)
ENSMUSG00000040220	Gas8	Common down (Quadrant 3)
ENSMUSG00000015619	Gata3	Common down (Quadrant 3)
ENSMUSG00000028085	Gatb	Common down (Quadrant 3)
ENSMUSG00000021943	Gdf10	Common down (Quadrant 3)
ENSMUSG00000051279	Gdf6	Common down (Quadrant 3)
ENSMUSG00000061666	Gdpd1	Common down (Quadrant 3)
ENSMUSG00000013150	Gfod2	Common down (Quadrant 3)
ENSMUSG00000025089	Gfra1	Common down (Quadrant 3)
ENSMUSG00000006345	Ggt1	Common down (Quadrant 3)
ENSMUSG00000006344	Ggt5	Common down (Quadrant 3)
ENSMUSG00000019433	Gipc1	Common down (Quadrant 3)
ENSMUSG00000039131	Gipc2	Common down (Quadrant 3)
ENSMUSG00000046623	Gjb4	Common down (Quadrant 3)
ENSMUSG00000021318	Gli3	Common down (Quadrant 3)
ENSMUSG00000014303	Glis2	Common down (Quadrant 3)
ENSMUSG00000031286	Glt28d2	Common down (Quadrant 3)
ENSMUSG00000086962	Gm12248	Common down (Quadrant 3)
ENSMUSG00000087265	Gm12349	Common down (Quadrant 3)
ENSMUSG00000081559	Gm12411	Common down (Quadrant 3)
ENSMUSG00000083494	Gm12873	Common down (Quadrant 3)
ENSMUSG00000083443	Gm15519	Common down (Quadrant 3)
ENSMUSG00000089812	Gm15867	Common down (Quadrant 3)
ENSMUSG00000078117	Gm16485	Common down (Quadrant 3)
ENSMUSG00000093587	Gm20554	Common down (Quadrant 3)
ENSMUSG00000096878	Gm21083	Common down (Quadrant 3)
ENSMUSG00000010529	Gm266	Common down (Quadrant 3)
ENSMUSG00000100502	Gm28286	Common down (Quadrant 3)
ENSMUSG00000117980	Gm30571	Common down (Quadrant 3)
ENSMUSG00000111602	Gm32014	Common down (Quadrant 3)
ENSMUSG00000111147	Gm33699	Common down (Quadrant 3)
ENSMUSG00000106957	Gm43085	Common down (Quadrant 3)
ENSMUSG00000108126	Gm43909	Common down (Quadrant 3)
ENSMUSG00000111977	Gm47163	Common down (Quadrant 3)
ENSMUSG00000073555	Gm4951	Common down (Quadrant 3)
ENSMUSG00000024697	Gna14	Common down (Quadrant 3)
ENSMUSG00000060227	Golm2	Common down (Quadrant 3)
ENSMUSG00000034220	Gpc1	Common down (Quadrant 3)
ENSMUSG00000055653	Gpc3	Common down (Quadrant 3)
ENSMUSG00000042804	Gpr153	Common down (Quadrant 3)
ENSMUSG00000051043	Gprc5c	Common down (Quadrant 3)
ENSMUSG00000026930	Gpsm1	Common down (Quadrant 3)
ENSMUSG00000027883	Gpsm2	Common down (Quadrant 3)
ENSMUSG00000018339	Gpx3	Common down (Quadrant 3)
ENSMUSG00000019312	Grb7	Common down (Quadrant 3)
ENSMUSG00000036523	Greb1	Common down (Quadrant 3)
ENSMUSG00000050069	Grem2	Common down (Quadrant 3)
ENSMUSG00000020656	Grhl1	Common down (Quadrant 3)
ENSMUSG00000022286	Grhl2	Common down (Quadrant 3)
ENSMUSG00000020524	Gria1	Common down (Quadrant 3)
ENSMUSG00000026874	Hc	Common down (Quadrant 3)
ENSMUSG00000034245	Hdac11	Common down (Quadrant 3)
ENSMUSG00000053461	Hhipl2	Common down (Quadrant 3)
ENSMUSG00000043099	Hic1	Common down (Quadrant 3)
ENSMUSG00000066842	Hmcn1	Common down (Quadrant 3)
ENSMUSG00000025813	Homer2	Common down (Quadrant 3)
ENSMUSG00000052566	Hook2	Common down (Quadrant 3)
ENSMUSG00000001656	Hoxc11	Common down (Quadrant 3)
ENSMUSG00000028785	Hpca	Common down (Quadrant 3)
ENSMUSG00000001249	Hpn	Common down (Quadrant 3)
ENSMUSG00000074852	Hpse2	Common down (Quadrant 3)
ENSMUSG00000039628	Hs3st6	Common down (Quadrant 3)
ENSMUSG00000091971	Hspa1a	Common down (Quadrant 3)
ENSMUSG00000090877	Hspa1b	Common down (Quadrant 3)
ENSMUSG00000070687	Htr1d	Common down (Quadrant 3)
ENSMUSG00000006205	Htra1	Common down (Quadrant 3)
ENSMUSG00000053414	Hunk	Common down (Quadrant 3)
ENSMUSG00000021379	Id4	Common down (Quadrant 3)
ENSMUSG00000031551	Ido1	Common down (Quadrant 3)
ENSMUSG00000025492	Ifitm3	Common down (Quadrant 3)
ENSMUSG00000062157	Ifnlr1	Common down (Quadrant 3)
ENSMUSG00000032816	Igdcc4	Common down (Quadrant 3)
ENSMUSG00000023046	Igfbp6	Common down (Quadrant 3)
ENSMUSG00000013367	Iglon5	Common down (Quadrant 3)
ENSMUSG00000036334	Igsf10	Common down (Quadrant 3)
ENSMUSG00000042035	Igsf3	Common down (Quadrant 3)
ENSMUSG00000037995	Igsf9	Common down (Quadrant 3)
ENSMUSG00000054072	Iigp1	Common down (Quadrant 3)
ENSMUSG00000024578	Il17b	Common down (Quadrant 3)
ENSMUSG00000043088	Il17re	Common down (Quadrant 3)
ENSMUSG00000022900	Ildr1	Common down (Quadrant 3)
ENSMUSG00000041605	Inava	Common down (Quadrant 3)
ENSMUSG00000032737	Inppl1	Common down (Quadrant 3)
ENSMUSG00000066607	Insyn1	Common down (Quadrant 3)
ENSMUSG00000026638	Irf6	Common down (Quadrant 3)
ENSMUSG00000055980	Irs1	Common down (Quadrant 3)
ENSMUSG00000031734	Irx3	Common down (Quadrant 3)
ENSMUSG00000021604	Irx4	Common down (Quadrant 3)
ENSMUSG00000031737	Irx5	Common down (Quadrant 3)
ENSMUSG00000035692	Isg15	Common down (Quadrant 3)
ENSMUSG00000037206	Islr	Common down (Quadrant 3)
ENSMUSG00000074766	Ism1	Common down (Quadrant 3)
ENSMUSG00000001507	Itga3	Common down (Quadrant 3)
ENSMUSG00000027087	Itgav	Common down (Quadrant 3)
ENSMUSG00000020758	Itgb4	Common down (Quadrant 3)
ENSMUSG00000031239	Itm2a	Common down (Quadrant 3)
ENSMUSG00000095115	Itpripl2	Common down (Quadrant 3)
ENSMUSG00000017817	Jph2	Common down (Quadrant 3)
ENSMUSG00000052684	Jun	Common down (Quadrant 3)
ENSMUSG00000035407	Kank4	Common down (Quadrant 3)
ENSMUSG00000079056	Kcnip3	Common down (Quadrant 3)
ENSMUSG00000033998	Kcnk1	Common down (Quadrant 3)
ENSMUSG00000023243	Kcnk5	Common down (Quadrant 3)
ENSMUSG00000000794	Kcnn3	Common down (Quadrant 3)
ENSMUSG00000037600	Kdf1	Common down (Quadrant 3)
ENSMUSG00000019932	Kera	Common down (Quadrant 3)
ENSMUSG00000026764	Kif5c	Common down (Quadrant 3)
ENSMUSG00000040714	Klc3	Common down (Quadrant 3)
ENSMUSG00000073700	Klhl21	Common down (Quadrant 3)
ENSMUSG00000020393	Kremen1	Common down (Quadrant 3)
ENSMUSG00000045545	Krt14	Common down (Quadrant 3)
ENSMUSG00000035557	Krt17	Common down (Quadrant 3)
ENSMUSG00000023043	Krt18	Common down (Quadrant 3)
ENSMUSG00000020911	Krt19	Common down (Quadrant 3)
ENSMUSG00000006777	Krt23	Common down (Quadrant 3)
ENSMUSG00000061527	Krt5	Common down (Quadrant 3)
ENSMUSG00000023039	Krt7	Common down (Quadrant 3)
ENSMUSG00000049382	Krt8	Common down (Quadrant 3)
ENSMUSG00000021843	Ktn1	Common down (Quadrant 3)
ENSMUSG00000041782	Lad1	Common down (Quadrant 3)
ENSMUSG00000019899	Lama2	Common down (Quadrant 3)
ENSMUSG00000024421	Lama3	Common down (Quadrant 3)
ENSMUSG00000015647	Lama5	Common down (Quadrant 3)
ENSMUSG00000026639	Lamb3	Common down (Quadrant 3)
ENSMUSG00000026479	Lamc2	Common down (Quadrant 3)
ENSMUSG00000040434	Large2	Common down (Quadrant 3)
ENSMUSG00000038366	Lasp1	Common down (Quadrant 3)
ENSMUSG00000033880	Lgals3bp	Common down (Quadrant 3)
ENSMUSG00000053522	Lgals7	Common down (Quadrant 3)
ENSMUSG00000020140	Lgr5	Common down (Quadrant 3)
ENSMUSG00000048332	Lhfp	Common down (Quadrant 3)
ENSMUSG00000023022	Lima1	Common down (Quadrant 3)
ENSMUSG00000049556	Lingo1	Common down (Quadrant 3)
ENSMUSG00000049288	Lix1l	Common down (Quadrant 3)
ENSMUSG00000028063	Lmna	Common down (Quadrant 3)
ENSMUSG00000062044	Lmtk3	Common down (Quadrant 3)
ENSMUSG00000038765	Lmx1b	Common down (Quadrant 3)
ENSMUSG00000032334	Loxl1	Common down (Quadrant 3)
ENSMUSG00000000693	Loxl3	Common down (Quadrant 3)
ENSMUSG00000020607	Lratd1	Common down (Quadrant 3)
ENSMUSG00000040249	Lrp1	Common down (Quadrant 3)
ENSMUSG00000027253	Lrp4	Common down (Quadrant 3)
ENSMUSG00000024913	Lrp5	Common down (Quadrant 3)
ENSMUSG00000052316	Lrrc15	Common down (Quadrant 3)
ENSMUSG00000039883	Lrrc17	Common down (Quadrant 3)
ENSMUSG00000046807	Lrrc75b	Common down (Quadrant 3)
ENSMUSG00000046589	Lrrc8e	Common down (Quadrant 3)
ENSMUSG00000026443	Lrrn2	Common down (Quadrant 3)
ENSMUSG00000001247	Lsr	Common down (Quadrant 3)
ENSMUSG00000001870	Ltbp1	Common down (Quadrant 3)
ENSMUSG00000036446	Lum	Common down (Quadrant 3)
ENSMUSG00000075602	Ly6a	Common down (Quadrant 3)
ENSMUSG00000057454	Lypd3	Common down (Quadrant 3)
ENSMUSG00000032184	Lysmd2	Common down (Quadrant 3)
ENSMUSG00000035342	Lzts2	Common down (Quadrant 3)
ENSMUSG00000041886	Macc1	Common down (Quadrant 3)
ENSMUSG00000031179	Magea9	Common down (Quadrant 3)
ENSMUSG00000061143	Maml3	Common down (Quadrant 3)
ENSMUSG00000027254	Map1a	Common down (Quadrant 3)
ENSMUSG00000052727	Map1b	Common down (Quadrant 3)
ENSMUSG00000015222	Map2	Common down (Quadrant 3)
ENSMUSG00000004864	Mapk13	Common down (Quadrant 3)
ENSMUSG00000033902	Mapkbp1	Common down (Quadrant 3)
ENSMUSG00000040502	Marchf9	Common down (Quadrant 3)
ENSMUSG00000001672	Marveld3	Common down (Quadrant 3)
ENSMUSG00000038732	Mboat1	Common down (Quadrant 3)
ENSMUSG00000020646	Mboat2	Common down (Quadrant 3)
ENSMUSG00000032717	Mdfi	Common down (Quadrant 3)
ENSMUSG00000027239	Mdk	Common down (Quadrant 3)
ENSMUSG00000017210	Med24	Common down (Quadrant 3)
ENSMUSG00000039208	Metrnl	Common down (Quadrant 3)
ENSMUSG00000074480	Mex3a	Common down (Quadrant 3)
ENSMUSG00000060572	Mfap2	Common down (Quadrant 3)
ENSMUSG00000042436	Mfap4	Common down (Quadrant 3)
ENSMUSG00000028655	Mfsd2a	Common down (Quadrant 3)
ENSMUSG00000042428	Mgat3	Common down (Quadrant 3)
ENSMUSG00000030218	Mgp	Common down (Quadrant 3)
ENSMUSG00000038244	Mical2	Common down (Quadrant 3)
ENSMUSG00000002580	Mien1	Common down (Quadrant 3)
ENSMUSG00000054005	Mill1	Common down (Quadrant 3)
ENSMUSG00000039313	Minar1	Common down (Quadrant 3)
ENSMUSG00000035852	Misp	Common down (Quadrant 3)
ENSMUSG00000026303	Mlph	Common down (Quadrant 3)
ENSMUSG00000039533	Mmd2	Common down (Quadrant 3)
ENSMUSG00000000957	Mmp14	Common down (Quadrant 3)
ENSMUSG00000031790	Mmp15	Common down (Quadrant 3)
ENSMUSG00000031740	Mmp2	Common down (Quadrant 3)
ENSMUSG00000020000	Moxd1	Common down (Quadrant 3)
ENSMUSG00000026566	Mpzl1	Common down (Quadrant 3)
ENSMUSG00000020695	Mrc2	Common down (Quadrant 3)
ENSMUSG00000054256	Msi1	Common down (Quadrant 3)
ENSMUSG00000021469	Msx2	Common down (Quadrant 3)
ENSMUSG00000052105	Mtcl1	Common down (Quadrant 3)
ENSMUSG00000029009	Mthfr	Common down (Quadrant 3)
ENSMUSG00000039431	Mtmr7	Common down (Quadrant 3)
ENSMUSG00000033763	Mtss2	Common down (Quadrant 3)
ENSMUSG00000029070	Mxra8	Common down (Quadrant 3)
ENSMUSG00000028654	Mycl	Common down (Quadrant 3)
ENSMUSG00000018830	Myh11	Common down (Quadrant 3)
ENSMUSG00000030739	Myh14	Common down (Quadrant 3)
ENSMUSG00000025885	Myo5b	Common down (Quadrant 3)
ENSMUSG00000026697	Myoc	Common down (Quadrant 3)
ENSMUSG00000048612	Myof	Common down (Quadrant 3)
ENSMUSG00000041120	Nbl1	Common down (Quadrant 3)
ENSMUSG00000066877	Nck2	Common down (Quadrant 3)
ENSMUSG00000062661	Ncs1	Common down (Quadrant 3)
ENSMUSG00000040138	Ndp	Common down (Quadrant 3)
ENSMUSG00000032012	Nectin1	Common down (Quadrant 3)
ENSMUSG00000006411	Nectin4	Common down (Quadrant 3)
ENSMUSG00000046449	Nexmif	Common down (Quadrant 3)
ENSMUSG00000023411	Nfatc4	Common down (Quadrant 3)
ENSMUSG00000029832	Nfe2l3	Common down (Quadrant 3)
ENSMUSG00000001911	Nfix	Common down (Quadrant 3)
ENSMUSG00000026259	Ngef	Common down (Quadrant 3)
ENSMUSG00000039835	Nhsl1	Common down (Quadrant 3)
ENSMUSG00000026796	Niban2	Common down (Quadrant 3)
ENSMUSG00000038879	Nipal2	Common down (Quadrant 3)
ENSMUSG00000031661	Nkd1	Common down (Quadrant 3)
ENSMUSG00000051790	Nlgn2	Common down (Quadrant 3)
ENSMUSG00000061411	Nol4l	Common down (Quadrant 3)
ENSMUSG00000029361	Nos1	Common down (Quadrant 3)
ENSMUSG00000002393	Nr2f6	Common down (Quadrant 3)
ENSMUSG00000032491	Nradd	Common down (Quadrant 3)
ENSMUSG00000006476	Nsmf	Common down (Quadrant 3)
ENSMUSG00000059857	Ntng1	Common down (Quadrant 3)
ENSMUSG00000063160	Numbl	Common down (Quadrant 3)
ENSMUSG00000030717	Nupr1	Common down (Quadrant 3)
ENSMUSG00000020844	Nxn	Common down (Quadrant 3)
ENSMUSG00000046719	Nxph3	Common down (Quadrant 3)
ENSMUSG00000045348	Nyap1	Common down (Quadrant 3)
ENSMUSG00000075592	Nynrin	Common down (Quadrant 3)
ENSMUSG00000066861	Oas1g	Common down (Quadrant 3)
ENSMUSG00000029561	Oasl2	Common down (Quadrant 3)
ENSMUSG00000026211	Obsl1	Common down (Quadrant 3)
ENSMUSG00000021638	Ocln	Common down (Quadrant 3)
ENSMUSG00000046618	Olfml2a	Common down (Quadrant 3)
ENSMUSG00000027848	Olfml3	Common down (Quadrant 3)
ENSMUSG00000048387	Osr1	Common down (Quadrant 3)
ENSMUSG00000023191	P3h3	Common down (Quadrant 3)
ENSMUSG00000006931	P3h4	Common down (Quadrant 3)
ENSMUSG00000051048	P4ha3	Common down (Quadrant 3)
ENSMUSG00000027257	Pacsin3	Common down (Quadrant 3)
ENSMUSG00000030602	Pak4	Common down (Quadrant 3)
ENSMUSG00000074923	Pak6	Common down (Quadrant 3)
ENSMUSG00000058056	Palld	Common down (Quadrant 3)
ENSMUSG00000027188	Pamr1	Common down (Quadrant 3)
ENSMUSG00000021223	Papln	Common down (Quadrant 3)
ENSMUSG00000028370	Pappa	Common down (Quadrant 3)
ENSMUSG00000028032	Papss1	Common down (Quadrant 3)
ENSMUSG00000025812	Pard3	Common down (Quadrant 3)
ENSMUSG00000044641	Pard6b	Common down (Quadrant 3)
ENSMUSG00000061859	Patj	Common down (Quadrant 3)
ENSMUSG00000052534	Pbx1	Common down (Quadrant 3)
ENSMUSG00000023495	Pcbp4	Common down (Quadrant 3)
ENSMUSG00000018537	Pcgf2	Common down (Quadrant 3)
ENSMUSG00000038370	Pcp4l1	Common down (Quadrant 3)
ENSMUSG00000029231	Pdgfra	Common down (Quadrant 3)
ENSMUSG00000031636	Pdlim3	Common down (Quadrant 3)
ENSMUSG00000020388	Pdlim4	Common down (Quadrant 3)
ENSMUSG00000021493	Pdlim7	Common down (Quadrant 3)
ENSMUSG00000028583	Pdpn	Common down (Quadrant 3)
ENSMUSG00000032959	Pebp1	Common down (Quadrant 3)
ENSMUSG00000045573	Penk	Common down (Quadrant 3)
ENSMUSG00000019851	Perp	Common down (Quadrant 3)
ENSMUSG00000067825	Pex26	Common down (Quadrant 3)
ENSMUSG00000031870	Pgr	Common down (Quadrant 3)
ENSMUSG00000054728	Phactr1	Common down (Quadrant 3)
ENSMUSG00000020205	Phlda1	Common down (Quadrant 3)
ENSMUSG00000041482	Piezo2	Common down (Quadrant 3)
ENSMUSG00000031834	Pik3r2	Common down (Quadrant 3)
ENSMUSG00000026413	Pkp1	Common down (Quadrant 3)
ENSMUSG00000002847	Pla1a	Common down (Quadrant 3)
ENSMUSG00000031538	Plat	Common down (Quadrant 3)
ENSMUSG00000020937	Plcd3	Common down (Quadrant 3)
ENSMUSG00000029055	Plch2	Common down (Quadrant 3)
ENSMUSG00000040428	Plekha4	Common down (Quadrant 3)
ENSMUSG00000041757	Plekha6	Common down (Quadrant 3)
ENSMUSG00000045659	Plekha7	Common down (Quadrant 3)
ENSMUSG00000030701	Plekhb1	Common down (Quadrant 3)
ENSMUSG00000074170	Plekhf1	Common down (Quadrant 3)
ENSMUSG00000052609	Plekhg3	Common down (Quadrant 3)
ENSMUSG00000038167	Plekhg6	Common down (Quadrant 3)
ENSMUSG00000060716	Plekhh1	Common down (Quadrant 3)
ENSMUSG00000040852	Plekhh2	Common down (Quadrant 3)
ENSMUSG00000021701	Plk2	Common down (Quadrant 3)
ENSMUSG00000032374	Plod2	Common down (Quadrant 3)
ENSMUSG00000052151	Plpp2	Common down (Quadrant 3)
ENSMUSG00000035835	Plppr3	Common down (Quadrant 3)
ENSMUSG00000017754	Pltp	Common down (Quadrant 3)
ENSMUSG00000031398	Plxna3	Common down (Quadrant 3)
ENSMUSG00000053646	Plxnb1	Common down (Quadrant 3)
ENSMUSG00000025608	Podxl	Common down (Quadrant 3)
ENSMUSG00000027750	Postn	Common down (Quadrant 3)
ENSMUSG00000036528	Ppfibp2	Common down (Quadrant 3)
ENSMUSG00000039457	Ppl	Common down (Quadrant 3)
ENSMUSG00000035829	Ppp1r26	Common down (Quadrant 3)
ENSMUSG00000050271	Prag1	Common down (Quadrant 3)
ENSMUSG00000005268	Prlr	Common down (Quadrant 3)
ENSMUSG00000024386	Proc	Common down (Quadrant 3)
ENSMUSG00000029086	Prom1	Common down (Quadrant 3)
ENSMUSG00000027376	Prom2	Common down (Quadrant 3)
ENSMUSG00000047040	Prr15l	Common down (Quadrant 3)
ENSMUSG00000039476	Prrx2	Common down (Quadrant 3)
ENSMUSG00000027978	Prss12	Common down (Quadrant 3)
ENSMUSG00000030800	Prss8	Common down (Quadrant 3)
ENSMUSG00000027864	Ptgfrn	Common down (Quadrant 3)
ENSMUSG00000017969	Ptgis	Common down (Quadrant 3)
ENSMUSG00000023972	Ptk7	Common down (Quadrant 3)
ENSMUSG00000029838	Ptn	Common down (Quadrant 3)
ENSMUSG00000034573	Ptpn13	Common down (Quadrant 3)
ENSMUSG00000038764	Ptpn3	Common down (Quadrant 3)
ENSMUSG00000033295	Ptprf	Common down (Quadrant 3)
ENSMUSG00000019889	Ptprk	Common down (Quadrant 3)
ENSMUSG00000013236	Ptprs	Common down (Quadrant 3)
ENSMUSG00000053141	Ptprt	Common down (Quadrant 3)
ENSMUSG00000043587	Pxylp1	Common down (Quadrant 3)
ENSMUSG00000060224	Pyroxd2	Common down (Quadrant 3)
ENSMUSG00000033684	Qsox1	Common down (Quadrant 3)
ENSMUSG00000078949	R3hdml	Common down (Quadrant 3)
ENSMUSG00000051343	Rab11fip5	Common down (Quadrant 3)
ENSMUSG00000021062	Rab15	Common down (Quadrant 3)
ENSMUSG00000026304	Rab17	Common down (Quadrant 3)
ENSMUSG00000008601	Rab25	Common down (Quadrant 3)
ENSMUSG00000052688	Rab7b	Common down (Quadrant 3)
ENSMUSG00000038020	Rapgefl1	Common down (Quadrant 3)
ENSMUSG00000001288	Rarg	Common down (Quadrant 3)
ENSMUSG00000043003	Rasef	Common down (Quadrant 3)
ENSMUSG00000032356	Rasgrf1	Common down (Quadrant 3)
ENSMUSG00000043639	Rbm20	Common down (Quadrant 3)
ENSMUSG00000046402	Rbp1	Common down (Quadrant 3)
ENSMUSG00000005973	Rcn1	Common down (Quadrant 3)
ENSMUSG00000019539	Rcn3	Common down (Quadrant 3)
ENSMUSG00000040855	Reps2	Common down (Quadrant 3)
ENSMUSG00000030222	Rerg	Common down (Quadrant 3)
ENSMUSG00000043333	Rhbdl2	Common down (Quadrant 3)
ENSMUSG00000017692	Rhbdl3	Common down (Quadrant 3)
ENSMUSG00000002233	Rhoc	Common down (Quadrant 3)
ENSMUSG00000039960	Rhou	Common down (Quadrant 3)
ENSMUSG00000034226	Rhov	Common down (Quadrant 3)
ENSMUSG00000037386	Rims2	Common down (Quadrant 3)
ENSMUSG00000001768	Rin2	Common down (Quadrant 3)
ENSMUSG00000005251	Ripk4	Common down (Quadrant 3)
ENSMUSG00000021876	Rnase4	Common down (Quadrant 3)
ENSMUSG00000058498	Rnf207	Common down (Quadrant 3)
ENSMUSG00000044628	Rnf208	Common down (Quadrant 3)
ENSMUSG00000035305	Ror1	Common down (Quadrant 3)
ENSMUSG00000021464	Ror2	Common down (Quadrant 3)
ENSMUSG00000039209	Rpl39l	Common down (Quadrant 3)
ENSMUSG00000027422	Rrbp1	Common down (Quadrant 3)
ENSMUSG00000028871	Rspo1	Common down (Quadrant 3)
ENSMUSG00000034930	Rtkn	Common down (Quadrant 3)
ENSMUSG00000047686	Rtl3	Common down (Quadrant 3)
ENSMUSG00000033355	Rtp4	Common down (Quadrant 3)
ENSMUSG00000006575	Rundc3a	Common down (Quadrant 3)
ENSMUSG00000034009	Rxfp1	Common down (Quadrant 3)
ENSMUSG00000042306	S100a14	Common down (Quadrant 3)
ENSMUSG00000001025	S100a6	Common down (Quadrant 3)
ENSMUSG00000047181	Samd14	Common down (Quadrant 3)
ENSMUSG00000060487	Samd5	Common down (Quadrant 3)
ENSMUSG00000024128	Sbp	Common down (Quadrant 3)
ENSMUSG00000046056	Sbsn	Common down (Quadrant 3)
ENSMUSG00000012017	Scarf2	Common down (Quadrant 3)
ENSMUSG00000032181	Scg3	Common down (Quadrant 3)
ENSMUSG00000002565	Scin	Common down (Quadrant 3)
ENSMUSG00000030340	Scnn1a	Common down (Quadrant 3)
ENSMUSG00000016763	Scube1	Common down (Quadrant 3)
ENSMUSG00000038677	Scube3	Common down (Quadrant 3)
ENSMUSG00000020592	Sdc1	Common down (Quadrant 3)
ENSMUSG00000017009	Sdc4	Common down (Quadrant 3)
ENSMUSG00000039683	Sdk1	Common down (Quadrant 3)
ENSMUSG00000003585	Sec14l2	Common down (Quadrant 3)
ENSMUSG00000019368	Sec14l4	Common down (Quadrant 3)
ENSMUSG00000034684	Sema3f	Common down (Quadrant 3)
ENSMUSG00000026121	Sema4c	Common down (Quadrant 3)
ENSMUSG00000038777	Sema6c	Common down (Quadrant 3)
ENSMUSG00000023232	Serinc2	Common down (Quadrant 3)
ENSMUSG00000067006	Serpinb5	Common down (Quadrant 3)
ENSMUSG00000000753	Serpinf1	Common down (Quadrant 3)
ENSMUSG00000016262	Sertad4	Common down (Quadrant 3)
ENSMUSG00000058153	Sez6l	Common down (Quadrant 3)
ENSMUSG00000047281	Sfn	Common down (Quadrant 3)
ENSMUSG00000031548	Sfrp1	Common down (Quadrant 3)
ENSMUSG00000027996	Sfrp2	Common down (Quadrant 3)
ENSMUSG00000050931	Sgms2	Common down (Quadrant 3)
ENSMUSG00000038351	Sgsm2	Common down (Quadrant 3)
ENSMUSG00000042303	Sgsm3	Common down (Quadrant 3)
ENSMUSG00000028082	Sh3d19	Common down (Quadrant 3)
ENSMUSG00000040711	Sh3pxd2b	Common down (Quadrant 3)
ENSMUSG00000020669	Sh3yl1	Common down (Quadrant 3)
ENSMUSG00000020312	Shc2	Common down (Quadrant 3)
ENSMUSG00000044461	Shisa2	Common down (Quadrant 3)
ENSMUSG00000041889	Shisa4	Common down (Quadrant 3)
ENSMUSG00000029381	Shroom3	Common down (Quadrant 3)
ENSMUSG00000024042	Sik1	Common down (Quadrant 3)
ENSMUSG00000030583	Sipa1l3	Common down (Quadrant 3)
ENSMUSG00000024597	Slc12a2	Common down (Quadrant 3)
ENSMUSG00000057060	Slc35f3	Common down (Quadrant 3)
ENSMUSG00000022464	Slc38a4	Common down (Quadrant 3)
ENSMUSG00000007034	Slc44a4	Common down (Quadrant 3)
ENSMUSG00000026435	Slc45a3	Common down (Quadrant 3)
ENSMUSG00000000792	Slc5a5	Common down (Quadrant 3)
ENSMUSG00000020062	Slc5a8	Common down (Quadrant 3)
ENSMUSG00000019558	Slc6a8	Common down (Quadrant 3)
ENSMUSG00000031596	Slc7a2	Common down (Quadrant 3)
ENSMUSG00000022180	Slc7a8	Common down (Quadrant 3)
ENSMUSG00000063975	Slco1a5	Common down (Quadrant 3)
ENSMUSG00000032548	Slco2a1	Common down (Quadrant 3)
ENSMUSG00000056427	Slit3	Common down (Quadrant 3)
ENSMUSG00000075478	Slitrk1	Common down (Quadrant 3)
ENSMUSG00000096215	Smim22	Common down (Quadrant 3)
ENSMUSG00000038059	Smim3	Common down (Quadrant 3)
ENSMUSG00000001761	Smo	Common down (Quadrant 3)
ENSMUSG00000023064	Sncg	Common down (Quadrant 3)
ENSMUSG00000047793	Sned1	Common down (Quadrant 3)
ENSMUSG00000027488	Snta1	Common down (Quadrant 3)
ENSMUSG00000041308	Sntb2	Common down (Quadrant 3)
ENSMUSG00000022091	Sorbs3	Common down (Quadrant 3)
ENSMUSG00000036169	Sostdc1	Common down (Quadrant 3)
ENSMUSG00000051817	Sox12	Common down (Quadrant 3)
ENSMUSG00000076431	Sox4	Common down (Quadrant 3)
ENSMUSG00000038305	Spats2l	Common down (Quadrant 3)
ENSMUSG00000061878	Sphk1	Common down (Quadrant 3)
ENSMUSG00000027315	Spint1	Common down (Quadrant 3)
ENSMUSG00000074227	Spint2	Common down (Quadrant 3)
ENSMUSG00000037379	Spon2	Common down (Quadrant 3)
ENSMUSG00000037239	Spred3	Common down (Quadrant 3)
ENSMUSG00000021061	Sptb	Common down (Quadrant 3)
ENSMUSG00000067889	Sptbn2	Common down (Quadrant 3)
ENSMUSG00000011751	Sptbn4	Common down (Quadrant 3)
ENSMUSG00000039092	Sptlc3	Common down (Quadrant 3)
ENSMUSG00000027646	Src	Common down (Quadrant 3)
ENSMUSG00000090084	Srpx	Common down (Quadrant 3)
ENSMUSG00000035279	Ssc5d	Common down (Quadrant 3)
ENSMUSG00000034616	Ssh3	Common down (Quadrant 3)
ENSMUSG00000036825	Ssx2ip	Common down (Quadrant 3)
ENSMUSG00000031995	St14	Common down (Quadrant 3)
ENSMUSG00000030688	Stard10	Common down (Quadrant 3)
ENSMUSG00000004043	Stat5a	Common down (Quadrant 3)
ENSMUSG00000020303	Stc2	Common down (Quadrant 3)
ENSMUSG00000033855	Ston1	Common down (Quadrant 3)
ENSMUSG00000020961	Ston2	Common down (Quadrant 3)
ENSMUSG00000024236	Svil	Common down (Quadrant 3)
ENSMUSG00000009394	Syn2	Common down (Quadrant 3)
ENSMUSG00000019737	Syne4	Common down (Quadrant 3)
ENSMUSG00000067629	Syngap1	Common down (Quadrant 3)
ENSMUSG00000043079	Synpo	Common down (Quadrant 3)
ENSMUSG00000058420	Syt17	Common down (Quadrant 3)
ENSMUSG00000028860	Sytl1	Common down (Quadrant 3)
ENSMUSG00000051397	Tacstd2	Common down (Quadrant 3)
ENSMUSG00000046985	Tapt1	Common down (Quadrant 3)
ENSMUSG00000018604	Tbx3	Common down (Quadrant 3)
ENSMUSG00000001604	Tcea3	Common down (Quadrant 3)
ENSMUSG00000044550	Tceal3	Common down (Quadrant 3)
ENSMUSG00000042712	Tceal9	Common down (Quadrant 3)
ENSMUSG00000030796	Tead2	Common down (Quadrant 3)
ENSMUSG00000002249	Tead3	Common down (Quadrant 3)
ENSMUSG00000049336	Tenm2	Common down (Quadrant 3)
ENSMUSG00000046694	Tent5b	Common down (Quadrant 3)
ENSMUSG00000025927	Tfap2b	Common down (Quadrant 3)
ENSMUSG00000026380	Tfcp2l1	Common down (Quadrant 3)
ENSMUSG00000040152	Thbs1	Common down (Quadrant 3)
ENSMUSG00000028047	Thbs3	Common down (Quadrant 3)
ENSMUSG00000032289	Thsd4	Common down (Quadrant 3)
ENSMUSG00000017466	Timp2	Common down (Quadrant 3)
ENSMUSG00000110218	Tincr	Common down (Quadrant 3)
ENSMUSG00000024812	Tjp2	Common down (Quadrant 3)
ENSMUSG00000034917	Tjp3	Common down (Quadrant 3)
ENSMUSG00000028132	Tlcd4	Common down (Quadrant 3)
ENSMUSG00000019734	Tmc4	Common down (Quadrant 3)
ENSMUSG00000032353	Tmed3	Common down (Quadrant 3)
ENSMUSG00000054675	Tmem119	Common down (Quadrant 3)
ENSMUSG00000050854	Tmem125	Common down (Quadrant 3)
ENSMUSG00000024736	Tmem132a	Common down (Quadrant 3)
ENSMUSG00000034324	Tmem132c	Common down (Quadrant 3)
ENSMUSG00000036687	Tmem184a	Common down (Quadrant 3)
ENSMUSG00000049420	Tmem200a	Common down (Quadrant 3)
ENSMUSG00000095407	Tmem200c	Common down (Quadrant 3)
ENSMUSG00000034435	Tmem30b	Common down (Quadrant 3)
ENSMUSG00000059900	Tmem40	Common down (Quadrant 3)
ENSMUSG00000028786	Tmem54	Common down (Quadrant 3)
ENSMUSG00000037129	Tmprss13	Common down (Quadrant 3)
ENSMUSG00000000385	Tmprss2	Common down (Quadrant 3)
ENSMUSG00000032091	Tmprss4	Common down (Quadrant 3)
ENSMUSG00000023905	Tnfrsf12a	Common down (Quadrant 3)
ENSMUSG00000023915	Tnfrsf21	Common down (Quadrant 3)
ENSMUSG00000039477	Tnrc18	Common down (Quadrant 3)
ENSMUSG00000017607	Tns4	Common down (Quadrant 3)
ENSMUSG00000033327	Tnxb	Common down (Quadrant 3)
ENSMUSG00000074607	Tox2	Common down (Quadrant 3)
ENSMUSG00000035274	Tpbg	Common down (Quadrant 3)
ENSMUSG00000040046	Tph1	Common down (Quadrant 3)
ENSMUSG00000014846	Tppp3	Common down (Quadrant 3)
ENSMUSG00000032013	Trim29	Common down (Quadrant 3)
ENSMUSG00000021071	Trim9	Common down (Quadrant 3)
ENSMUSG00000026510	Trp53bp2	Common down (Quadrant 3)
ENSMUSG00000031997	Trpc6	Common down (Quadrant 3)
ENSMUSG00000038260	Trpm4	Common down (Quadrant 3)
ENSMUSG00000038679	Trps1	Common down (Quadrant 3)
ENSMUSG00000028699	Tspan1	Common down (Quadrant 3)
ENSMUSG00000030352	Tspan9	Common down (Quadrant 3)
ENSMUSG00000058672	Tubb2a	Common down (Quadrant 3)
ENSMUSG00000001473	Tubb6	Common down (Quadrant 3)
ENSMUSG00000005968	Tuft1	Common down (Quadrant 3)
ENSMUSG00000027298	Tyro3	Common down (Quadrant 3)
ENSMUSG00000044949	Ubtd2	Common down (Quadrant 3)
ENSMUSG00000028456	Unc13b	Common down (Quadrant 3)
ENSMUSG00000041523	Upk2	Common down (Quadrant 3)
ENSMUSG00000025481	Urah	Common down (Quadrant 3)
ENSMUSG00000034993	Vat1	Common down (Quadrant 3)
ENSMUSG00000038775	Vill	Common down (Quadrant 3)
ENSMUSG00000066894	Vsig10	Common down (Quadrant 3)
ENSMUSG00000051076	Vtcn1	Common down (Quadrant 3)
ENSMUSG00000042116	Vwa1	Common down (Quadrant 3)
ENSMUSG00000017723	Wfdc2	Common down (Quadrant 3)
ENSMUSG00000029671	Wnt16	Common down (Quadrant 3)
ENSMUSG00000036856	Wnt4	Common down (Quadrant 3)
ENSMUSG00000022382	Wnt7b	Common down (Quadrant 3)
ENSMUSG00000040483	Xaf1	Common down (Quadrant 3)
ENSMUSG00000053110	Yap1	Common down (Quadrant 3)
ENSMUSG00000044646	Zbtb7c	Common down (Quadrant 3)
ENSMUSG00000028807	Zbtb8a	Common down (Quadrant 3)
ENSMUSG00000048485	Zbtb8b	Common down (Quadrant 3)
ENSMUSG00000074682	Zcchc3	Common down (Quadrant 3)
ENSMUSG00000046658	Zfp316	Common down (Quadrant 3)
ENSMUSG00000043903	Zfp469	Common down (Quadrant 3)
ENSMUSG00000028358	Zfp618	Common down (Quadrant 3)
ENSMUSG00000045639	Zfp629	Common down (Quadrant 3)
ENSMUSG00000054893	Zfp667	Common down (Quadrant 3)
ENSMUSG00000040209	Zfp704	Common down (Quadrant 3)
ENSMUSG00000039238	Zfp750	Common down (Quadrant 3)
ENSMUSG00000093910	Zfp853	Common down (Quadrant 3)
ENSMUSG00000055782	Abcd2	OS_up AS_down (Quadrant 4)
ENSMUSG00000032735	Ablim3	OS_up AS_down (Quadrant 4)
ENSMUSG00000030861	Acadsb	OS_up AS_down (Quadrant 4)
ENSMUSG00000026834	Acvr1c	OS_up AS_down (Quadrant 4)
ENSMUSG00000030022	Adamts9	OS_up AS_down (Quadrant 4)
ENSMUSG00000056492	Adgrf5	OS_up AS_down (Quadrant 4)
ENSMUSG00000025911	Adhfe1	OS_up AS_down (Quadrant 4)
ENSMUSG00000022878	Adipoq	OS_up AS_down (Quadrant 4)
ENSMUSG00000031489	Adrb3	OS_up AS_down (Quadrant 4)
ENSMUSG00000050103	Agmo	OS_up AS_down (Quadrant 4)
ENSMUSG00000074264	Amy1	OS_up AS_down (Quadrant 4)
ENSMUSG00000074771	Ankef1	OS_up AS_down (Quadrant 4)
ENSMUSG00000019326	Aoc3	OS_up AS_down (Quadrant 4)
ENSMUSG00000063558	Aox1	OS_up AS_down (Quadrant 4)
ENSMUSG00000037010	Apln	OS_up AS_down (Quadrant 4)
ENSMUSG00000028427	Aqp7	OS_up AS_down (Quadrant 4)
ENSMUSG00000039031	Arhgap18	OS_up AS_down (Quadrant 4)
ENSMUSG00000039831	Arhgap29	OS_up AS_down (Quadrant 4)
ENSMUSG00000052921	Arhgef15	OS_up AS_down (Quadrant 4)
ENSMUSG00000021662	Arhgef28	OS_up AS_down (Quadrant 4)
ENSMUSG00000021388	Aspn	OS_up AS_down (Quadrant 4)
ENSMUSG00000007097	Atp1a2	OS_up AS_down (Quadrant 4)
ENSMUSG00000026463	Atp2b4	OS_up AS_down (Quadrant 4)
ENSMUSG00000033849	B3galt2	OS_up AS_down (Quadrant 4)
ENSMUSG00000000317	Bcl6b	OS_up AS_down (Quadrant 4)
ENSMUSG00000067787	Blcap	OS_up AS_down (Quadrant 4)
ENSMUSG00000078566	Bnip3	OS_up AS_down (Quadrant 4)
ENSMUSG00000028300	C9orf72	OS_up AS_down (Quadrant 4)
ENSMUSG00000027559	Car3	OS_up AS_down (Quadrant 4)
ENSMUSG00000000805	Car4	OS_up AS_down (Quadrant 4)
ENSMUSG00000007655	Cav1	OS_up AS_down (Quadrant 4)
ENSMUSG00000000058	Cav2	OS_up AS_down (Quadrant 4)
ENSMUSG00000045954	Cavin2	OS_up AS_down (Quadrant 4)
ENSMUSG00000026676	Ccdc3	OS_up AS_down (Quadrant 4)
ENSMUSG00000028076	Cd1d1	OS_up AS_down (Quadrant 4)
ENSMUSG00000002944	Cd36	OS_up AS_down (Quadrant 4)
ENSMUSG00000027435	Cd93	OS_up AS_down (Quadrant 4)
ENSMUSG00000056973	Ces1d	OS_up AS_down (Quadrant 4)
ENSMUSG00000031725	Ces1f	OS_up AS_down (Quadrant 4)
ENSMUSG00000027221	Chst1	OS_up AS_down (Quadrant 4)
ENSMUSG00000030278	Cidec	OS_up AS_down (Quadrant 4)
ENSMUSG00000023959	Clic5	OS_up AS_down (Quadrant 4)
ENSMUSG00000032452	Clstn2	OS_up AS_down (Quadrant 4)
ENSMUSG00000022235	Cmbl	OS_up AS_down (Quadrant 4)
ENSMUSG00000047409	Ctdspl	OS_up AS_down (Quadrant 4)
ENSMUSG00000025479	Cyp2e1	OS_up AS_down (Quadrant 4)
ENSMUSG00000025815	Dhtkd1	OS_up AS_down (Quadrant 4)
ENSMUSG00000007682	Dio2	OS_up AS_down (Quadrant 4)
ENSMUSG00000031523	Dlc1	OS_up AS_down (Quadrant 4)
ENSMUSG00000033788	Dysf	OS_up AS_down (Quadrant 4)
ENSMUSG00000053898	Ech1	OS_up AS_down (Quadrant 4)
ENSMUSG00000074364	Ehd2	OS_up AS_down (Quadrant 4)
ENSMUSG00000027624	Epb41l1	OS_up AS_down (Quadrant 4)
ENSMUSG00000022040	Ephx2	OS_up AS_down (Quadrant 4)
ENSMUSG00000001946	Esam	OS_up AS_down (Quadrant 4)
ENSMUSG00000019768	Esr1	OS_up AS_down (Quadrant 4)
ENSMUSG00000032314	Etfa	OS_up AS_down (Quadrant 4)
ENSMUSG00000062515	Fabp4	OS_up AS_down (Quadrant 4)
ENSMUSG00000037712	Fermt2	OS_up AS_down (Quadrant 4)
ENSMUSG00000008090	Fgfrl1	OS_up AS_down (Quadrant 4)
ENSMUSG00000027955	Gask1b	OS_up AS_down (Quadrant 4)
ENSMUSG00000055737	Ghr	OS_up AS_down (Quadrant 4)
ENSMUSG00000101939	Gm28438	OS_up AS_down (Quadrant 4)
ENSMUSG00000089783	Gm454	OS_up AS_down (Quadrant 4)
ENSMUSG00000109674	Gm45470	OS_up AS_down (Quadrant 4)
ENSMUSG00000111840	Gm48832	OS_up AS_down (Quadrant 4)
ENSMUSG00000057614	Gnai1	OS_up AS_down (Quadrant 4)
ENSMUSG00000029314	Gpat3	OS_up AS_down (Quadrant 4)
ENSMUSG00000031119	Gpc4	OS_up AS_down (Quadrant 4)
ENSMUSG00000020176	Grb10	OS_up AS_down (Quadrant 4)
ENSMUSG00000049241	Hcar1	OS_up AS_down (Quadrant 4)
ENSMUSG00000032744	Heyl	OS_up AS_down (Quadrant 4)
ENSMUSG00000028383	Hsdl2	OS_up AS_down (Quadrant 4)
ENSMUSG00000025092	Hspa12a	OS_up AS_down (Quadrant 4)
ENSMUSG00000074793	Hspa12b	OS_up AS_down (Quadrant 4)
ENSMUSG00000064215	Ifi27	OS_up AS_down (Quadrant 4)
ENSMUSG00000027111	Itga6	OS_up AS_down (Quadrant 4)
ENSMUSG00000027276	Jag1	OS_up AS_down (Quadrant 4)
ENSMUSG00000053062	Jam2	OS_up AS_down (Quadrant 4)
ENSMUSG00000033960	Jcad	OS_up AS_down (Quadrant 4)
ENSMUSG00000042099	Kank3	OS_up AS_down (Quadrant 4)
ENSMUSG00000043673	Kcns3	OS_up AS_down (Quadrant 4)
ENSMUSG00000041633	Kctd12b	OS_up AS_down (Quadrant 4)
ENSMUSG00000063077	Kif1b	OS_up AS_down (Quadrant 4)
ENSMUSG00000021294	Kif26a	OS_up AS_down (Quadrant 4)
ENSMUSG00000024972	Lgals12	OS_up AS_down (Quadrant 4)
ENSMUSG00000024395	Lims2	OS_up AS_down (Quadrant 4)
ENSMUSG00000003123	Lipe	OS_up AS_down (Quadrant 4)
ENSMUSG00000015568	Lpl	OS_up AS_down (Quadrant 4)
ENSMUSG00000034158	Lrrc58	OS_up AS_down (Quadrant 4)
ENSMUSG00000039246	Lyplal1	OS_up AS_down (Quadrant 4)
ENSMUSG00000033174	Mgll	OS_up AS_down (Quadrant 4)
ENSMUSG00000008540	Mgst1	OS_up AS_down (Quadrant 4)
ENSMUSG00000068566	Myadm	OS_up AS_down (Quadrant 4)
ENSMUSG00000027002	Nckap1	OS_up AS_down (Quadrant 4)
ENSMUSG00000028565	Nfia	OS_up AS_down (Quadrant 4)
ENSMUSG00000032271	Nnmt	OS_up AS_down (Quadrant 4)
ENSMUSG00000028469	Npr2	OS_up AS_down (Quadrant 4)
ENSMUSG00000022206	Npr3	OS_up AS_down (Quadrant 4)
ENSMUSG00000025810	Nrp1	OS_up AS_down (Quadrant 4)
ENSMUSG00000026525	Opn3	OS_up AS_down (Quadrant 4)
ENSMUSG00000033377	Palmd	OS_up AS_down (Quadrant 4)
ENSMUSG00000030513	Pcsk6	OS_up AS_down (Quadrant 4)
ENSMUSG00000022197	Pdzd2	OS_up AS_down (Quadrant 4)
ENSMUSG00000021846	Peli2	OS_up AS_down (Quadrant 4)
ENSMUSG00000060675	Plaat3	OS_up AS_down (Quadrant 4)
ENSMUSG00000030546	Plin1	OS_up AS_down (Quadrant 4)
ENSMUSG00000028600	Podn	OS_up AS_down (Quadrant 4)
ENSMUSG00000005514	Por	OS_up AS_down (Quadrant 4)
ENSMUSG00000020154	Ptprb	OS_up AS_down (Quadrant 4)
ENSMUSG00000028399	Ptprd	OS_up AS_down (Quadrant 4)
ENSMUSG00000028996	Rbp7	OS_up AS_down (Quadrant 4)
ENSMUSG00000066361	Serpina3c	OS_up AS_down (Quadrant 4)
ENSMUSG00000005360	Slc1a3	OS_up AS_down (Quadrant 4)
ENSMUSG00000036298	Slc2a13	OS_up AS_down (Quadrant 4)
ENSMUSG00000060961	Slc4a4	OS_up AS_down (Quadrant 4)
ENSMUSG00000030495	Slc7a10	OS_up AS_down (Quadrant 4)
ENSMUSG00000072941	Sod3	OS_up AS_down (Quadrant 4)
ENSMUSG00000068747	Sort1	OS_up AS_down (Quadrant 4)
ENSMUSG00000025902	Sox17	OS_up AS_down (Quadrant 4)
ENSMUSG00000051910	Sox6	OS_up AS_down (Quadrant 4)
ENSMUSG00000063060	Sox7	OS_up AS_down (Quadrant 4)
ENSMUSG00000012428	Steap4	OS_up AS_down (Quadrant 4)
ENSMUSG00000028369	Svep1	OS_up AS_down (Quadrant 4)
ENSMUSG00000050052	Tdrp	OS_up AS_down (Quadrant 4)
ENSMUSG00000033191	Tie1	OS_up AS_down (Quadrant 4)
ENSMUSG00000020044	Timp3	OS_up AS_down (Quadrant 4)
ENSMUSG00000079588	Tmem182	OS_up AS_down (Quadrant 4)
ENSMUSG00000030095	Tmem43	OS_up AS_down (Quadrant 4)
ENSMUSG00000037003	Tns2	OS_up AS_down (Quadrant 4)
ENSMUSG00000021573	Tppp	OS_up AS_down (Quadrant 4)
ENSMUSG00000029669	Tspan12	OS_up AS_down (Quadrant 4)
ENSMUSG00000034911	Ushbp1	OS_up AS_down (Quadrant 4)
ENSMUSG00000023951	Vegfa	OS_up AS_down (Quadrant 4)
ENSMUSG00000024924	Vldlr	OS_up AS_down (Quadrant 4)
