# Supplementary material for: Mechanic Insight into the Distinct and Common Roles of Ovariectomy Versus Adrenalectomy on Adipose Tissue Remodeling in Female Mice
Source: Int J Mol Sci. 2023 Jan 24;24(3):2308. doi: 10.3390/ijms24032308 (PMC9916485; doi:10.3390/ijms24032308)
Supplement: Supplementary file 1 [file ijms-24-02308-s001.zip › Table S5 SAT selectivily expressed DEGs under ADX treatment.xlsx]

## Sheet: Gene list
gene_id	gene_name	AV1	AV2	AS1	AS2	AV	AS	log2FoldChange	pvalue	padj	Corresponding to figure S6A
ENSMUSG00000026657	Frmd4a	324.909	308.516	558.355	640.728	316.713	599.541	-0.920567	0.0018591	0.00817262
ENSMUSG00000041238	Rbbp8	178.359	150.725	382.608	273.726	164.542	328.167	-0.995922	0.00588339	0.0218241
ENSMUSG00000029053	Prkcz	72.7069	68.2974	134.543	157.785	70.5022	146.164	-1.05156	0.0147453	0.0466152
ENSMUSG00000040929	Rfx3	144.278	143.66	376.722	226.652	143.969	301.687	-1.06755	0.00636757	0.0233634
ENSMUSG00000005267	Zfp287	78.3871	83.6055	206.861	134.248	80.9963	170.554	-1.07474	0.0141476	0.0451555
ENSMUSG00000059708	Akap17b	71.5709	56.522	156.407	126.402	64.0464	141.404	-1.14229	0.0111956	0.0372444
ENSMUSG00000046169	Adamts6	98.836	87.1381	251.428	160.4	92.987	205.914	-1.14701	0.00662436	0.0240623
ENSMUSG00000040606	Kazn	90.8836	120.109	190.043	286.802	105.496	238.422	-1.17654	0.00423213	0.0165342
ENSMUSG00000031433	Rbm41	89.7476	80.0729	233.769	164.759	84.9102	199.264	-1.23069	0.00304697	0.01246
ENSMUSG00000072774	Zfp951	54.5302	51.8119	144.634	107.224	53.171	125.929	-1.24404	0.00856742	0.0297056
ENSMUSG00000023066	Rttn	120.421	113.044	353.176	203.115	116.732	278.146	-1.25282	0.00228643	0.00977594
ENSMUSG00000022514	Il1rap	86.3395	64.7648	187.52	175.219	75.5521	181.37	-1.26281	0.00245785	0.0104153
ENSMUSG00000037580	Gch1	57.9383	60.0546	159.77	125.53	58.9965	142.65	-1.27408	0.00460479	0.0177566
ENSMUSG00000078606	Gvin2	112.469	87.1381	241.337	245.83	99.8033	243.584	-1.28673	0.00070167	0.00353158
ENSMUSG00000030276	Ttll3	49.986	35.3263	119.407	88.9173	42.6561	104.162	-1.2874	0.0133946	0.0432979
ENSMUSG00000029798	Herc6	128.373	128.352	348.131	280.7	128.363	314.415	-1.29258	0.00025675	0.0014691
ENSMUSG00000039328	Rnf122	102.244	83.6055	285.064	171.732	92.9248	228.398	-1.29735	0.00241754	0.0102673
ENSMUSG00000028341	Nr4a3	60.2104	55.3445	167.338	118.556	57.7774	142.947	-1.30699	0.00459824	0.0177426
ENSMUSG00000032578	Cish	89.7476	78.8953	195.929	225.78	84.3215	210.855	-1.32188	0.000780151	0.00386932
ENSMUSG00000050555	Hyls1	59.0744	63.5873	196.77	109.839	61.3308	153.304	-1.32226	0.00619281	0.0228262
ENSMUSG00000073437	D330041H03Rik	40.8976	35.3263	112.68	78.4564	38.112	95.5683	-1.32623	0.0131087	0.0425205
ENSMUSG00000046111	Cep295	230.617	223.733	721.489	424.536	227.175	573.013	-1.3349	0.000205467	0.00120634
ENSMUSG00000055994	Nod2	49.986	43.5691	111.839	127.274	46.7775	119.556	-1.35332	0.00461707	0.0177774
ENSMUSG00000030055	Rab43	54.5302	32.9712	89.135	137.735	43.7507	113.435	-1.37302	0.0104135	0.0351286
ENSMUSG00000086370	Ftx	124.965	144.838	469.22	243.215	134.901	356.218	-1.40129	0.00073425	0.00367037
ENSMUSG00000032344	Cgas	48.85	30.6161	110.998	99.3781	39.733	105.188	-1.40345	0.00737906	0.0262999
ENSMUSG00000117964	Gm36043	31.8093	43.5691	106.794	93.276	37.6892	100.035	-1.40928	0.00697661	0.0250748
ENSMUSG00000031391	L1cam	87.4755	90.6707	244.701	229.267	89.0731	236.984	-1.41186	0.000179868	0.00107813
ENSMUSG00000027959	Sass6	44.3058	40.0364	123.612	101.122	42.1711	112.367	-1.41379	0.00425452	0.0166007
ENSMUSG00000079505	Gm11131	43.1697	31.7936	110.157	89.789	37.4817	99.9732	-1.4147	0.00710811	0.0254949
ENSMUSG00000078700	D030028A08Rik	53.3941	55.3445	157.248	139.478	54.3693	148.363	-1.44847	0.00109379	0.00518993
ENSMUSG00000033717	Adra2a	38.6255	58.8771	128.657	142.093	48.7513	135.375	-1.47444	0.00209421	0.00905774
ENSMUSG00000033949	Trim36	40.8976	34.1487	125.294	85.4303	37.5232	105.362	-1.48933	0.00476682	0.0182484
ENSMUSG00000070605	Zfp992	38.6255	42.3915	153.884	75.8412	40.5085	114.863	-1.50431	0.0065725	0.0239395
ENSMUSG00000033502	Cdc14a	115.877	96.5585	337.199	267.624	106.218	302.412	-1.50926	4.46721e-05	0.000317947
ENSMUSG00000021338	Carmil1	111.332	103.624	304.405	310.339	107.478	307.372	-1.51577	1.66924e-05	0.000132206
ENSMUSG00000043587	Pxylp1	46.5779	76.5402	179.952	172.604	61.5591	176.278	-1.51898	0.00072659	0.00363817
ENSMUSG00000063506	Arhgap22	20.4488	23.5508	58.8627	67.9956	21.9998	63.4292	-1.52797	0.0146954	0.0464926
ENSMUSG00000032750	Gab3	36.3535	25.9059	101.748	78.4564	31.1297	90.1024	-1.53252	0.00604184	0.0223367
ENSMUSG00000028037	Ifi44	52.2581	64.7648	139.589	202.243	58.5115	170.916	-1.54675	0.000629555	0.00322641
ENSMUSG00000041658	Rragb	22.7209	20.0182	71.4762	54.0478	21.3696	62.762	-1.5542	0.0147375	0.0465975
ENSMUSG00000028634	Hivep3	189.72	141.305	478.47	496.891	165.512	487.68	-1.5585	2.556e-06	2.43776e-05
ENSMUSG00000017718	Afmid	24.993	18.8407	76.5216	53.176	21.9168	64.8488	-1.56451	0.0145889	0.0462604
ENSMUSG00000025161	Slc16a3	43.1697	44.7466	94.1804	166.502	43.9582	130.341	-1.56778	0.00231744	0.00988836
ENSMUSG00000061894	Zscan20	46.5779	78.8953	198.452	174.348	62.7366	186.4	-1.57229	0.000475915	0.00253526
ENSMUSG00000061859	Patj	110.196	96.5585	285.064	330.389	103.377	307.726	-1.57335	1.26996e-05	0.000103159
ENSMUSG00000050022	Amz1	47.7139	32.9712	112.68	129.889	40.3425	121.285	-1.58687	0.00148726	0.00675365
ENSMUSG00000021707	Dhfr	73.843	50.6343	255.633	120.3	62.2386	187.966	-1.59427	0.00168583	0.0075282
ENSMUSG00000031669	Gins3	36.3535	36.5038	138.748	81.9434	36.4286	110.346	-1.5993	0.00297002	0.0122122
ENSMUSG00000079355	Ackr4	38.6255	35.3263	128.657	95.8912	36.9759	112.274	-1.60236	0.00170384	0.00760026
ENSMUSG00000002228	Ppm1j	14.7686	24.7284	58.8627	61.0217	19.7485	59.9422	-1.60344	0.0155415	0.0486907
ENSMUSG00000038085	Cnbd2	52.2581	28.261	159.77	85.4303	40.2596	122.6	-1.6056	0.0045857	0.0177013
ENSMUSG00000045868	Gvin1	77.2511	96.5585	290.95	238.856	86.9048	264.903	-1.60858	2.95234e-05	0.000220006
ENSMUSG00000097589	Dleu2	114.741	156.613	547.424	283.315	135.677	415.369	-1.61482	0.000111099	0.000709844
ENSMUSG00000027635	Dsn1	44.3058	43.5691	177.429	92.4042	43.9374	134.917	-1.61893	0.00198755	0.00866086
ENSMUSG00000051498	Tlr6	47.7139	41.214	141.271	133.376	44.4639	137.323	-1.62649	0.000464278	0.00248148
ENSMUSG00000071454	Dtnb	74.979	100.091	273.291	269.367	87.535	271.329	-1.63278	1.77826e-05	0.000139749
ENSMUSG00000040254	Sema3d	98.836	55.3445	287.587	196.141	77.0902	241.864	-1.6487	0.000242643	0.00139563
ENSMUSG00000033669	Zfp7	48.85	58.8771	179.952	159.528	53.8635	169.74	-1.65656	0.00014427	0.000890518
ENSMUSG00000070305	Mpzl3	56.8023	82.4279	237.974	202.243	69.6151	220.108	-1.66173	6.7763e-05	0.000458881
ENSMUSG00000054942	Miga1	126.101	101.269	436.425	285.058	113.685	360.742	-1.66574	1.4682e-05	0.000117484
ENSMUSG00000055235	Wdr86	26.129	40.0364	89.135	121.172	33.0827	105.153	-1.66932	0.00214498	0.00924675
ENSMUSG00000098905	Zfp953	53.3941	56.522	245.542	106.352	54.9581	175.947	-1.67926	0.0012357	0.00575754
ENSMUSG00000074220	Zfp382	24.993	18.8407	92.4986	47.9456	21.9168	70.2221	-1.67958	0.010878	0.0363927
ENSMUSG00000027778	Ift80	154.502	151.903	633.195	352.182	153.203	492.689	-1.6854	1.09988e-05	9.07892e-05
ENSMUSG00000035842	Ddx11	62.4825	69.475	208.542	216.191	65.9787	212.367	-1.68674	2.51673e-05	0.000190599
ENSMUSG00000029591	Ung	48.85	36.5038	172.384	102.865	42.6769	137.624	-1.68882	0.000967407	0.00468154
ENSMUSG00000023328	Ache	19.3128	44.7466	83.2487	123.787	32.0297	103.518	-1.69414	0.00456167	0.0176373
ENSMUSG00000029999	Tgfa	76.1151	44.7466	203.497	188.295	60.4308	195.896	-1.69554	0.000143894	0.000888502
ENSMUSG00000068299	Nat8f4	28.4011	27.0835	98.3849	81.9434	27.7423	90.1641	-1.70048	0.00209567	0.00906029
ENSMUSG00000097534	Gm16675	45.4418	29.4386	143.793	100.25	37.4402	122.022	-1.70356	0.00114801	0.00541525
ENSMUSG00000033906	Zdhhc15	30.6732	42.3915	152.202	88.9173	36.5324	120.56	-1.72375	0.00139438	0.00638457
ENSMUSG00000002835	Chaf1a	62.4825	58.8771	220.315	181.322	60.6798	200.818	-1.72658	3.19119e-05	0.000235043
ENSMUSG00000031756	Cenpn	31.8093	20.0182	105.112	67.1238	25.9137	86.1179	-1.73159	0.00406408	0.0159851
ENSMUSG00000019996	Map7	84.0674	69.475	269.928	243.215	76.7712	256.571	-1.74031	6.06854e-06	5.32652e-05
ENSMUSG00000027360	Hdc	67.0267	30.6161	141.271	185.68	48.8214	163.475	-1.74165	0.000682747	0.00345251
ENSMUSG00000078439	Smim24	14.7686	14.1305	49.6129	47.9456	14.4495	48.7792	-1.75511	0.0142417	0.0453865
ENSMUSG00000086533	Mypopos	22.7209	37.6813	120.248	84.5586	30.2011	102.403	-1.76333	0.00174915	0.00776926
ENSMUSG00000024112	Cacna1h	82.9313	131.885	314.495	420.178	107.408	367.337	-1.77469	5.73239e-06	5.06119e-05
ENSMUSG00000063354	Slc39a4	35.2174	23.5508	91.6577	115.069	29.3841	103.364	-1.81316	0.000913413	0.00445009
ENSMUSG00000044348	Slc25a53	81.7953	52.9894	291.791	182.193	67.3923	236.992	-1.81351	5.51747e-05	0.000384203
ENSMUSG00000021932	Rnaseh2b	67.0267	70.6525	280.019	206.602	68.8396	243.31	-1.82181	6.58324e-06	5.72307e-05
ENSMUSG00000030187	Klra2	22.7209	8.24279	49.6129	61.8934	15.4819	55.7531	-1.84527	0.0136265	0.0438534
ENSMUSG00000015981	Stk32c	17.0407	11.7754	56.3401	47.9456	14.4081	52.1428	-1.85439	0.00946796	0.0323615
ENSMUSG00000073678	Pgap1	211.304	201.36	980.485	513.454	206.332	746.969	-1.85617	8.0653e-07	8.56682e-06
ENSMUSG00000022369	Mtbp	43.1697	51.8119	213.588	132.504	47.4908	173.046	-1.86623	8.36579e-05	0.000554495
ENSMUSG00000036856	Wnt4	18.1767	45.9241	121.93	112.454	32.0504	117.192	-1.87284	0.00115125	0.00542566
ENSMUSG00000018381	Abi3	39.7616	50.6343	149.68	181.322	45.198	165.501	-1.87309	3.7894e-05	0.000274086
ENSMUSG00000054115	Skp2	57.9383	43.5691	229.565	144.709	50.7537	187.137	-1.88206	5.60297e-05	0.00038938
ENSMUSG00000036304	Zdhhc23	36.3535	54.1669	195.088	139.478	45.2602	167.283	-1.88729	7.3671e-05	0.000493775
ENSMUSG00000075028	Prdm11	53.3941	52.9894	231.247	164.759	53.1918	198.003	-1.89645	1.37241e-05	0.00011058
ENSMUSG00000038151	Prdm1	67.0267	77.7178	304.405	235.369	72.3722	269.887	-1.89938	1.30765e-06	1.33094e-05
ENSMUSG00000046245	Pilra	35.2174	37.6813	135.384	137.735	36.4494	136.559	-1.90578	6.2624e-05	0.000428374
ENSMUSG00000032122	Slc37a2	95.4278	76.5402	348.972	297.263	85.984	323.117	-1.90947	2.4624e-07	2.89634e-06
ENSMUSG00000020990	Cdkl1	15.9046	12.953	59.7036	48.8173	14.4288	54.2605	-1.91036	0.00654737	0.0238745
ENSMUSG00000026708	Cenpl	31.8093	32.9712	158.089	85.4303	32.3902	121.759	-1.91093	0.000488016	0.00258787
ENSMUSG00000021815	Mss51	10.2244	21.1958	73.9989	44.4586	15.7101	59.2288	-1.91736	0.0085219	0.0295821
ENSMUSG00000028078	Dclk2	82.9313	84.783	355.699	281.571	83.8572	318.635	-1.92609	2.00881e-07	2.39867e-06
ENSMUSG00000047507	Baiap3	46.5779	44.7466	176.588	171.732	45.6622	174.16	-1.93124	9.63772e-06	8.05388e-05
ENSMUSG00000041836	Ptpre	136.325	140.128	519.674	539.606	138.226	529.64	-1.93802	7.92621e-10	1.41515e-08
ENSMUSG00000072919	Noxred1	15.9046	8.24279	52.9765	40.1	12.0737	46.5382	-1.94443	0.012547	0.0409653
ENSMUSG00000026458	Ppfia4	55.6662	43.5691	171.543	213.576	49.6176	192.559	-1.9555	7.92979e-06	6.75064e-05
ENSMUSG00000091345	Col6a5	110.196	104.801	401.108	437.613	107.499	419.36	-1.9637	5.05454e-09	8.04306e-08
ENSMUSG00000035439	Haus8	55.6662	50.6343	202.656	213.576	53.1503	208.116	-1.96891	1.87191e-06	1.85025e-05
ENSMUSG00000027173	Depdc7	17.0407	8.24279	42.0448	58.4065	12.6417	50.2256	-1.98736	0.00950032	0.0324562
ENSMUSG00000030528	Blm	64.7546	44.7466	264.882	169.989	54.7506	217.436	-1.98896	1.23612e-05	0.000100723
ENSMUSG00000048442	Smim5	19.3128	12.953	68.1126	60.1499	16.1329	64.1313	-1.98963	0.00277773	0.0115555
ENSMUSG00000070547	Mrgprb1	35.2174	40.0364	139.589	159.528	37.6269	149.558	-1.9912	2.11856e-05	0.000163342
ENSMUSG00000028212	Ccne2	32.9453	32.9712	182.475	81.0716	32.9583	131.773	-1.99981	0.000436157	0.00234979
ENSMUSG00000028528	Dnajc6	29.5372	43.5691	165.657	127.274	36.5531	146.465	-2.00389	4.92836e-05	0.000345944
ENSMUSG00000058794	Nfe2	23.857	20.0182	65.5899	110.711	21.9376	88.1503	-2.00555	0.000960188	0.00464977
ENSMUSG00000032420	Nt5e	88.6116	115.399	497.811	324.287	102.005	411.049	-2.01135	1.68498e-07	2.04277e-06
ENSMUSG00000032815	Fanca	63.6186	37.6813	204.338	204.858	50.6499	204.598	-2.01273	6.78408e-06	5.87084e-05
ENSMUSG00000038775	Vill	45.4418	60.0546	142.111	284.187	52.7482	213.149	-2.01497	3.85832e-05	0.000278686
ENSMUSG00000025140	Pycr1	7.95232	27.0835	71.4762	70.6108	17.5179	71.0435	-2.02331	0.00471479	0.0180922
ENSMUSG00000097194	9330175E14Rik	56.8023	45.9241	228.724	193.526	51.3632	211.125	-2.03876	1.41524e-06	1.43063e-05
ENSMUSG00000036109	Mbnl3	70.4348	44.7466	293.473	180.45	57.5907	236.961	-2.03993	8.93856e-06	7.51464e-05
ENSMUSG00000015342	Xk	51.1221	38.8589	254.792	119.428	44.9905	187.11	-2.05591	7.04693e-05	0.000474291
ENSMUSG00000078942	Naip6	65.8906	58.8771	287.587	232.754	62.3839	260.17	-2.06002	1.99098e-07	2.382e-06
ENSMUSG00000082088	Gm15753	11.3605	14.1305	58.8627	47.9456	12.7455	53.4042	-2.06806	0.00409985	0.0160956
ENSMUSG00000030674	Qprt	7.95232	32.9712	86.6123	85.4303	20.4617	86.0213	-2.07522	0.00314956	0.0128244
ENSMUSG00000022070	Bora	46.5779	50.6343	258.996	150.811	48.6061	204.903	-2.07626	8.19144e-06	6.95359e-05
ENSMUSG00000084984	Far1os	7.95232	12.953	47.9311	40.9717	10.4526	44.4514	-2.0905	0.00819608	0.028665
ENSMUSG00000059323	Tonsl	29.5372	41.214	140.43	161.272	35.3756	150.851	-2.09331	1.34372e-05	0.000108603
ENSMUSG00000079038	D130040H23Rik	36.3535	30.6161	177.429	108.967	33.4848	143.198	-2.09622	4.48694e-05	0.000319026
ENSMUSG00000031488	Rab11fip1	97.6999	81.2504	345.608	422.793	89.4752	384.201	-2.10174	4.99278e-09	7.96295e-08
ENSMUSG00000084797	Gm14321	10.2244	8.24279	44.5675	35.7413	9.2336	40.1544	-2.11989	0.00989701	0.0336576
ENSMUSG00000030031	Kbtbd8	49.986	37.6813	270.769	110.711	43.8337	190.74	-2.12124	8.70089e-05	0.00057416
ENSMUSG00000097418	Mir155hg	5.68023	16.4856	58.8627	37.4847	11.0829	48.1737	-2.12384	0.0100323	0.0340402
ENSMUSG00000002578	Ikzf4	29.5372	20.0182	116.044	101.122	24.7777	108.583	-2.13037	9.92946e-05	0.000645662
ENSMUSG00000039431	Mtmr7	42.0337	31.7936	211.065	113.326	36.9137	162.195	-2.13507	3.8245e-05	0.000276339
ENSMUSG00000001166	Oas1c	23.857	31.7936	129.498	115.069	27.8253	122.284	-2.13691	3.62587e-05	0.000263442
ENSMUSG00000017550	Atad5	78.3871	65.9424	411.198	225.78	72.1648	318.489	-2.14175	6.66619e-07	7.21251e-06
ENSMUSG00000026479	Lamc2	63.6186	60.0546	188.361	365.258	61.8366	276.81	-2.16195	1.81263e-06	1.79589e-05
ENSMUSG00000040724	Kcna2	115.877	114.222	708.035	324.287	115.049	516.161	-2.16574	3.42158e-07	3.92095e-06
ENSMUSG00000020926	Adam11	48.85	51.8119	253.951	200.5	50.3309	227.225	-2.17495	1.93031e-07	2.3166e-06
ENSMUSG00000025574	Tk1	70.4348	69.475	357.381	274.598	69.9549	315.989	-2.17549	1.14128e-08	1.7107e-07
ENSMUSG00000041827	Oasl1	36.3535	30.6161	102.589	200.5	33.4848	151.545	-2.17727	4.53486e-05	0.000321777
ENSMUSG00000023968	Crip3	6.81627	9.42034	39.5221	33.9978	8.11831	36.76	-2.18046	0.0113509	0.0376919
ENSMUSG00000028602	Tnfrsf8	20.4488	20.0182	123.612	61.0217	20.2335	92.3167	-2.19026	0.000500253	0.00264271
ENSMUSG00000092060	Bend4	68.1627	50.6343	317.018	225.78	59.3985	271.399	-2.19129	1.50528e-07	1.84484e-06
ENSMUSG00000022838	Eaf2	59.0744	51.8119	326.268	181.322	55.4431	253.795	-2.19453	1.20146e-06	1.23299e-05
ENSMUSG00000015112	Slc25a13	22.7209	16.4856	95.8622	84.5586	19.6033	90.2104	-2.20104	0.000181636	0.00108654
ENSMUSG00000015966	Il17rb	35.2174	21.1958	158.929	101.122	28.2066	130.026	-2.20336	5.97665e-05	0.000412211
ENSMUSG00000069793	Slfn9	32.9453	61.2322	251.428	184.808	47.0888	218.118	-2.21346	2.51533e-06	2.40335e-05
ENSMUSG00000044303	Cdkn2a	10.2244	7.06525	37.8403	42.7152	8.64483	40.2778	-2.21833	0.00763375	0.026987
ENSMUSG00000024340	Btnl2	11.3605	18.8407	90.8168	50.5608	15.1006	70.6888	-2.22919	0.00133266	0.00614767
ENSMUSG00000002489	Tiam1	126.101	127.175	678.603	509.967	126.638	594.285	-2.23057	1.92756e-11	4.33235e-10
ENSMUSG00000031861	Lpar2	52.2581	32.9712	229.565	171.732	42.6146	200.649	-2.23404	1.41369e-06	1.42975e-05
ENSMUSG00000081683	Fzd10	2.27209	22.3733	54.6583	61.8934	12.3227	58.2758	-2.24625	0.0116083	0.0383916
ENSMUSG00000033350	Chst2	95.4278	71.8301	430.539	366.13	83.6289	398.334	-2.25126	5.87098e-10	1.06826e-08
ENSMUSG00000030325	Klrb1c	18.1767	10.5979	71.4762	66.2521	14.3873	68.8641	-2.25684	0.000766931	0.00380917
ENSMUSG00000026639	Lamb3	45.4418	40.0364	175.747	235.369	42.7391	205.558	-2.26531	2.84161e-07	3.30521e-06
ENSMUSG00000056418	BC043934	18.1767	17.6631	90.8168	81.9434	17.9199	86.3801	-2.26911	0.000136403	0.00084771
ENSMUSG00000091144	Phf11c	39.7616	36.5038	192.565	178.706	38.1327	185.636	-2.28312	2.46955e-07	2.9031e-06
ENSMUSG00000029822	Osbpl3	96.5639	105.979	491.924	495.147	101.271	493.536	-2.28517	3.64297e-12	8.9366e-11
ENSMUSG00000036225	Kctd1	34.0814	49.4568	179.111	229.267	41.7691	204.189	-2.29045	3.95351e-07	4.49116e-06
ENSMUSG00000056735	A930024E05Rik	7.95232	15.308	62.2263	51.4325	11.6302	56.8294	-2.29161	0.00192143	0.00841657
ENSMUSG00000022468	Endou	20.4488	27.0835	135.384	97.6347	23.7661	116.509	-2.29479	2.77595e-05	0.000208196
ENSMUSG00000074802	Gas2l3	21.5849	41.214	165.657	142.093	31.3994	153.875	-2.29515	7.72978e-06	6.60186e-05
ENSMUSG00000004709	Cd244a	30.6732	27.0835	142.111	142.093	28.8783	142.102	-2.29838	2.56812e-06	2.44597e-05
ENSMUSG00000003355	Fkbp11	15.9046	24.7284	100.908	99.3781	20.3165	100.143	-2.3031	6.08028e-05	0.000418382
ENSMUSG00000075122	Cd80	32.9453	31.7936	203.497	116.813	32.3695	160.155	-2.30699	6.41128e-06	5.58286e-05
ENSMUSG00000021725	Parp8	106.788	120.109	705.512	434.997	113.449	570.255	-2.32994	2.63225e-10	5.07181e-09
ENSMUSG00000050107	Haspin	27.2651	35.3263	190.043	126.402	31.2957	158.222	-2.33909	3.0507e-06	2.85875e-05
ENSMUSG00000062082	Cd200r4	12.4965	8.24279	58.0219	47.0739	10.3696	52.5479	-2.33962	0.00194115	0.00848342
ENSMUSG00000078485	Plekhn1	51.1221	58.8771	273.291	286.802	54.9996	280.047	-2.34861	1.54136e-09	2.65239e-08
ENSMUSG00000003418	St8sia6	82.9313	91.8483	586.946	303.365	87.3898	445.155	-2.34917	1.68413e-08	2.44217e-07
ENSMUSG00000040829	Zmynd15	48.85	54.1669	280.019	251.932	51.5084	265.975	-2.36883	2.30678e-09	3.83394e-08
ENSMUSG00000036875	Dna2	47.7139	41.214	255.633	203.987	44.4639	229.81	-2.36937	2.3499e-08	3.32916e-07
ENSMUSG00000039452	Snx22	12.4965	10.5979	64.749	54.9195	11.5472	59.8343	-2.37283	0.000796929	0.00394039
ENSMUSG00000036381	P2ry14	34.0814	41.214	218.633	171.732	37.6477	195.183	-2.37504	1.34854e-07	1.66479e-06
ENSMUSG00000107017	Gm43196	6.81627	7.06525	36.9994	35.7413	6.94076	36.3704	-2.38981	0.00667	0.0242056
ENSMUSG00000097804	Gm16685	22.7209	4.71017	89.135	55.7912	13.7155	72.4631	-2.39739	0.00219125	0.00942179
ENSMUSG00000020042	Btbd11	54.5302	43.5691	234.61	292.032	49.0496	263.321	-2.42364	3.81084e-09	6.17773e-08
ENSMUSG00000032204	Aqp9	20.4488	7.06525	69.7944	78.4564	13.757	74.1254	-2.42588	0.000587131	0.00303501
ENSMUSG00000041046	Ramp3	10.2244	7.06525	47.0902	46.2021	8.64483	46.6462	-2.43013	0.00230033	0.00982536
ENSMUSG00000074480	Mex3a	17.0407	22.3733	117.725	95.0195	19.707	106.372	-2.43367	1.70345e-05	0.000134763
ENSMUSG00000033777	Tlr13	45.4418	56.522	271.61	279.828	50.9819	275.719	-2.43587	8.15906e-10	1.45483e-08
ENSMUSG00000029283	Cdc7	43.1697	50.6343	317.018	191.782	46.902	254.4	-2.44011	4.75126e-08	6.37308e-07
ENSMUSG00000052949	Rnf157	69.2988	87.1381	526.401	324.287	78.2184	425.344	-2.44376	7.22835e-10	1.2972e-08
ENSMUSG00000025395	Prim1	52.2581	43.5691	339.722	182.193	47.9136	260.958	-2.44509	1.32579e-07	1.6396e-06
ENSMUSG00000074277	Phldb3	20.4488	17.6631	75.6807	132.504	19.056	104.092	-2.44858	4.53896e-05	0.000321849
ENSMUSG00000097354	2310001H17Rik	54.5302	63.5873	366.631	279.828	59.0587	323.229	-2.45296	3.27525e-10	6.22849e-09
ENSMUSG00000019734	Tmc4	28.4011	34.1487	119.407	223.165	31.2749	171.286	-2.45359	2.3483e-06	2.26235e-05
ENSMUSG00000039676	Capsl	13.6325	2.35508	47.0902	40.9717	7.99382	44.0309	-2.45606	0.0075663	0.0268256
ENSMUSG00000037868	Egr2	40.8976	27.0835	236.292	141.222	33.9906	188.757	-2.47228	8.0907e-07	8.58944e-06
ENSMUSG00000011267	Zfp296	20.4488	8.24279	84.0896	75.8412	14.3458	79.9654	-2.47533	0.00024221	0.00139352
ENSMUSG00000082154	Gm16464	3.40814	7.06525	31.9541	26.1521	5.23669	29.0531	-2.47559	0.014057	0.0449073
ENSMUSG00000043924	Ncmap	4.54418	12.953	38.6812	58.4065	8.74857	48.5438	-2.47599	0.00327099	0.0132544
ENSMUSG00000064147	Rab44	39.7616	28.261	132.862	246.702	34.0113	189.782	-2.47888	1.24018e-06	1.26961e-05
ENSMUSG00000015533	Itga2	24.993	41.214	194.247	176.091	33.1035	185.169	-2.48565	1.61834e-07	1.97226e-06
ENSMUSG00000023032	Slc4a8	104.516	140.128	893.873	477.712	122.322	685.793	-2.48768	2.89704e-10	5.55269e-09
ENSMUSG00000032724	Abtb2	49.986	78.8953	401.948	321.671	64.4407	361.81	-2.49053	3.90987e-10	7.35076e-09
ENSMUSG00000021123	Rdh12	19.3128	31.7936	190.883	97.6347	25.5532	144.259	-2.49908	1.18773e-05	9.75019e-05
ENSMUSG00000062157	Ifnlr1	24.993	20.0182	98.3849	156.913	22.5056	127.649	-2.50263	5.90052e-06	5.19429e-05
ENSMUSG00000108393	Gm32633	10.2244	8.24279	62.2263	42.7152	9.2336	52.4708	-2.50587	0.00118545	0.00556052
ENSMUSG00000029359	Tesc	13.6325	17.6631	113.521	64.5086	15.6478	89.0148	-2.50957	9.41935e-05	0.000615937
ENSMUSG00000052125	F730043M19Rik	21.5849	34.1487	195.929	122.915	27.8668	159.422	-2.51812	1.64528e-06	1.64175e-05
ENSMUSG00000075555	Gm10863	3.40814	10.5979	34.4768	46.2021	7.00301	40.3394	-2.5306	0.00537237	0.0202225
ENSMUSG00000028572	Hook1	85.2034	60.0546	512.106	329.517	72.629	420.811	-2.53387	2.61118e-10	5.04049e-09
ENSMUSG00000055069	Rab39	13.6325	17.6631	101.748	80.1999	15.6478	90.9742	-2.54086	3.09215e-05	0.000228457
ENSMUSG00000079685	Ulbp1	47.7139	41.214	358.222	159.528	44.4639	258.875	-2.54148	3.31253e-07	3.80849e-06
ENSMUSG00000035095	Fam167a	14.7686	41.214	184.156	142.965	27.9913	163.561	-2.54989	5.60728e-06	4.9654e-05
ENSMUSG00000117442	1810073O08Rik	6.81627	10.5979	53.8174	48.8173	8.70708	51.3174	-2.56141	0.00101417	0.0048696
ENSMUSG00000027692	Tnik	51.1221	85.9606	439.789	368.745	68.5413	404.267	-2.56169	7.70795e-11	1.58893e-09
ENSMUSG00000028989	Angptl7	6.81627	10.5979	63.0672	40.1	8.70708	51.5836	-2.5691	0.00125448	0.00583462
ENSMUSG00000022456	Septin3	24.993	34.1487	179.111	171.732	29.5709	175.422	-2.56987	5.03857e-08	6.7197e-07
ENSMUSG00000068101	Cenpm	10.2244	8.24279	65.5899	44.4586	9.2336	55.0243	-2.57441	0.000755208	0.00375808
ENSMUSG00000034664	Itga2b	60.2104	54.1669	266.564	418.434	57.1887	342.499	-2.58179	2.89775e-10	5.55269e-09
ENSMUSG00000004661	Arid3b	113.605	103.624	838.374	463.765	108.614	651.069	-2.58358	1.57345e-11	3.5983e-10
ENSMUSG00000030154	Klrb1f	15.9046	10.5979	106.794	52.3043	13.2513	79.5491	-2.58455	0.000214978	0.00125689
ENSMUSG00000052302	Tbc1d30	20.4488	24.7284	165.657	108.096	22.5886	136.876	-2.60027	1.37958e-06	1.39931e-05
ENSMUSG00000074476	Spc24	13.6325	24.7284	140.43	93.276	19.1805	116.853	-2.6096	9.349e-06	7.83452e-05
ENSMUSG00000032776	Mctp2	62.4825	30.6161	346.449	224.037	46.5493	285.243	-2.61368	3.426e-08	4.6825e-07
ENSMUSG00000028434	Epb41l4b	45.4418	32.9712	139.589	341.721	39.2065	240.655	-2.61666	7.77229e-07	8.28503e-06
ENSMUSG00000039934	Gsap	71.5709	62.4097	498.652	328.645	66.9903	413.648	-2.62617	1.43944e-11	3.30628e-10
ENSMUSG00000028100	Nudt17	23.857	16.4856	137.066	115.941	20.1713	126.504	-2.64731	1.07318e-06	1.1106e-05
ENSMUSG00000027797	Dclk1	96.5639	193.117	1012.44	806.358	144.84	909.399	-2.65144	3.07802e-12	7.59249e-11
ENSMUSG00000012126	Ubxn11	17.0407	15.308	116.044	88.0456	16.1744	102.045	-2.65714	6.39497e-06	5.57561e-05
ENSMUSG00000004933	Matk	14.7686	27.0835	148.839	115.941	20.926	132.39	-2.66404	1.5684e-06	1.57253e-05
ENSMUSG00000027171	Prrg4	6.81627	10.5979	58.8627	51.4325	8.70708	55.1476	-2.66536	0.000495421	0.00262248
ENSMUSG00000087150	BC064078	26.129	8.24279	110.998	108.096	17.1859	109.547	-2.66825	2.84368e-05	0.000212438
ENSMUSG00000039193	Nlrc4	40.8976	27.0835	265.723	171.732	33.9906	218.728	-2.68473	1.93638e-08	2.77715e-07
ENSMUSG00000007080	Pole	57.9383	42.3915	394.38	251.061	50.1649	322.72	-2.68479	3.34657e-10	6.34878e-09
ENSMUSG00000078616	Trim30c	4.54418	12.953	52.1356	60.1499	8.74857	56.1428	-2.6864	0.000751865	0.00374323
ENSMUSG00000018166	Erbb3	64.7546	75.3627	306.927	610.217	70.0586	458.572	-2.71065	2.31119e-10	4.49458e-09
ENSMUSG00000050914	Ankrd37	6.81627	12.953	86.6123	42.7152	9.88462	64.6637	-2.71298	0.00044586	0.00239344
ENSMUSG00000026126	Ptpn18	62.4825	30.6161	294.314	319.056	46.5493	306.685	-2.71779	7.3767e-10	1.32155e-08
ENSMUSG00000031934	Panx1	61.3465	69.475	523.878	340.85	65.4107	432.364	-2.72517	2.41609e-12	6.02583e-11
ENSMUSG00000021384	Susd3	39.7616	36.5038	268.246	237.985	38.1327	253.115	-2.73042	5.35525e-11	1.1342e-09
ENSMUSG00000029923	Rab19	20.4488	21.1958	163.975	114.198	20.8223	139.086	-2.74019	2.81989e-07	3.28543e-06
ENSMUSG00000027832	Ptx3	6.81627	14.1305	39.5221	101.122	10.4734	70.3219	-2.74957	0.000473958	0.00252612
ENSMUSG00000030427	Lilra6	10.2244	11.7754	73.9989	74.0977	10.9999	74.0483	-2.7517	4.10978e-05	0.000295117
ENSMUSG00000000791	Il12rb1	13.6325	12.953	95.0213	84.5586	13.2928	89.7899	-2.75575	8.47821e-06	7.16505e-05
ENSMUSG00000021696	Elovl7	15.9046	11.7754	92.4986	95.0195	13.84	93.759	-2.7586	6.38208e-06	5.57356e-05
ENSMUSG00000004864	Mapk13	13.6325	21.1958	51.2947	184.808	17.4142	118.052	-2.76196	0.000101863	0.000660514
ENSMUSG00000083161	Gm11427	14.7686	20.0182	147.998	89.789	17.3934	118.893	-2.77472	2.35091e-06	2.26382e-05
ENSMUSG00000029915	Clec5a	18.1767	24.7284	148.839	144.709	21.4526	146.774	-2.77581	6.22074e-08	8.17131e-07
ENSMUSG00000082419	Gm11425	6.81627	2.35508	34.4768	28.7674	4.58568	31.6221	-2.78074	0.00648416	0.0237039
ENSMUSG00000022360	Atad2	144.278	147.193	1341.23	666.88	145.735	1004.05	-2.78455	4.1596e-13	1.1202e-11
ENSMUSG00000032400	Zwilch	15.9046	24.7284	171.543	108.967	20.3165	140.255	-2.78945	5.47663e-07	6.04768e-06
ENSMUSG00000031561	Tenm3	30.6732	41.214	250.587	247.574	35.9436	249.08	-2.79402	5.38415e-11	1.13917e-09
ENSMUSG00000075297	H60b	6.81627	7.06525	59.7036	36.613	6.94076	48.1583	-2.79523	0.000831626	0.00408684
ENSMUSG00000074607	Tox2	43.1697	17.6631	274.973	148.195	30.4164	211.584	-2.79604	4.23562e-07	4.7702e-06
ENSMUSG00000100280	Gm28417	11.3605	4.71017	61.3854	50.5608	8.03531	55.9731	-2.7963	0.000442639	0.0023792
ENSMUSG00000026873	Phf19	40.8976	16.4856	229.565	170.861	28.6916	200.213	-2.80005	1.07054e-07	1.35089e-06
ENSMUSG00000045775	Slc16a5	28.4011	12.953	171.543	119.428	20.6771	145.485	-2.81199	7.27945e-07	7.83149e-06
ENSMUSG00000037572	Wdhd1	46.5779	48.2792	446.516	226.652	47.4285	336.584	-2.82749	4.68778e-10	8.69703e-09
ENSMUSG00000106891	Gm43460	4.54418	12.953	81.567	43.5869	8.74857	62.5769	-2.84337	0.00043088	0.00232555
ENSMUSG00000051969	Tlr11	15.9046	23.5508	153.884	129.889	19.7277	141.887	-2.84838	8.31907e-08	1.0673e-06
ENSMUSG00000048895	Cdk5r1	17.0407	16.4856	151.361	90.6608	16.7631	121.011	-2.85197	1.07493e-06	1.11131e-05
ENSMUSG00000030217	Art4	11.3605	17.6631	115.203	94.1477	14.5118	104.675	-2.85292	2.08192e-06	2.03002e-05
ENSMUSG00000076757	Trgc4	9.08836	3.53263	62.2263	29.6391	6.3105	45.9327	-2.85993	0.00173401	0.00771098
ENSMUSG00000017499	Cdc6	19.3128	20.0182	174.906	111.582	19.6655	143.244	-2.8652	1.39127e-07	1.71249e-06
ENSMUSG00000022237	Ankrd33b	45.4418	63.5873	459.97	345.208	54.5145	402.589	-2.88582	1.74954e-13	4.89849e-12
ENSMUSG00000089809	Rasgef1b	64.7546	35.3263	434.743	306.852	50.0404	370.798	-2.88784	2.22028e-11	4.92675e-10
ENSMUSG00000039013	Siglecf	7.95232	7.06525	53.8174	57.5347	7.50879	55.676	-2.88968	0.000188772	0.00112154
ENSMUSG00000051682	Treml4	9.08836	4.71017	48.772	54.0478	6.89927	51.4099	-2.89399	0.000405663	0.00220767
ENSMUSG00000030322	Mbd4	53.3941	61.2322	598.718	254.548	57.3132	426.633	-2.89659	5.81795e-10	1.06231e-08
ENSMUSG00000093979	Gm2237	2.27209	10.5979	53.8174	41.8434	6.43499	47.8304	-2.90049	0.00134103	0.00617812
ENSMUSG00000058290	Espl1	43.1697	41.214	355.699	274.598	42.1919	315.148	-2.90095	6.54872e-13	1.71935e-11
ENSMUSG00000073492	Gm10521	11.3605	15.308	135.384	63.6369	13.3343	99.5106	-2.90149	1.35328e-05	0.000109333
ENSMUSG00000037628	Cdkn3	10.2244	7.06525	85.7714	43.5869	8.64483	64.6792	-2.90207	0.000173178	0.00104371
ENSMUSG00000043439	Epop	18.1767	9.42034	110.998	95.8912	13.7985	103.445	-2.90327	2.53621e-06	2.42219e-05
ENSMUSG00000005824	Tnfsf14	13.6325	11.7754	98.3849	92.4042	12.704	95.3946	-2.9079	2.17641e-06	2.11525e-05
ENSMUSG00000026068	Il18rap	47.7139	36.5038	348.131	285.93	42.1089	317.031	-2.91149	6.53603e-13	1.71817e-11
ENSMUSG00000022952	Runx1	107.924	158.968	952.736	1062.65	133.446	1007.69	-2.91749	1.53134e-19	7.45191e-18
ENSMUSG00000110148	5830408C22Rik	14.7686	9.42034	116.044	67.1238	12.0945	91.5838	-2.919	1.21271e-05	9.91247e-05
ENSMUSG00000052477	C130026I21Rik	11.3605	10.5979	103.43	62.7651	10.9792	83.0977	-2.92006	1.65741e-05	0.000131369
ENSMUSG00000009772	Nuak2	53.3941	49.4568	429.698	349.567	51.4255	389.633	-2.92138	7.88878e-15	2.55927e-13
ENSMUSG00000027833	Shox2	12.4965	17.6631	96.7031	131.632	15.0798	114.168	-2.92193	6.76618e-07	7.31313e-06
ENSMUSG00000021636	Marveld2	23.857	22.3733	154.725	197.013	23.1151	175.869	-2.92712	2.22194e-09	3.71062e-08
ENSMUSG00000051590	Map3k19	29.5372	8.24279	185.838	103.737	18.89	144.787	-2.93458	5.34773e-06	4.75771e-05
ENSMUSG00000100199	Gm20324	10.2244	8.24279	78.2034	64.5086	9.2336	71.356	-2.94905	2.77326e-05	0.000208069
ENSMUSG00000107761	2010008C14Rik	3.40814	8.24279	49.6129	40.1	5.82547	44.8564	-2.94962	0.000889004	0.00434737
ENSMUSG00000110575	6330537M06Rik	2.27209	8.24279	43.7266	37.4847	5.25744	40.6057	-2.95549	0.00181999	0.00803107
ENSMUSG00000111229	Gm39323	3.40814	17.6631	105.953	57.5347	10.5356	81.7438	-2.96165	0.000185043	0.00110228
ENSMUSG00000042724	Map3k9	20.4488	20.0182	181.634	135.119	20.2335	158.377	-2.96864	8.1508e-09	1.25041e-07
ENSMUSG00000046006	Gapt	19.3128	12.953	142.111	111.582	16.1329	126.847	-2.97323	1.46873e-07	1.80465e-06
ENSMUSG00000041219	Arhgap11a	63.6186	60.0546	607.968	366.13	61.8366	487.049	-2.97754	5.22404e-14	1.53962e-12
ENSMUSG00000113184	Gm49654	14.7686	3.53263	89.135	55.7912	9.15061	72.4631	-2.98	0.0001599	0.000976339
ENSMUSG00000025936	Gm4956	4.54418	14.1305	96.7031	50.5608	9.33734	73.6319	-2.98439	0.000130093	0.000813079
ENSMUSG00000029177	Cenpa	48.85	48.2792	489.402	283.315	48.5646	386.358	-2.99213	1.47435e-12	3.75315e-11
ENSMUSG00000067591	Klra3	2.27209	7.06525	50.4538	23.5369	4.66867	36.9954	-2.99223	0.00332415	0.0134489
ENSMUSG00000020974	Pole2	13.6325	16.4856	155.566	84.5586	15.0591	120.062	-2.99634	8.68506e-07	9.16002e-06
ENSMUSG00000044703	Phf11a	10.2244	7.06525	51.2947	87.1738	8.64483	69.2342	-2.99924	5.6653e-05	0.000393319
ENSMUSG00000110682	A530010L16Rik	6.81627	4.71017	40.363	52.3043	5.76322	46.3337	-3.00477	0.000497161	0.0026297
ENSMUSG00000049307	Fut4	28.4011	17.6631	190.043	181.322	23.0321	185.682	-3.00896	8.73839e-10	1.55274e-08
ENSMUSG00000022479	Vdr	32.9453	16.4856	105.953	295.519	24.7155	200.736	-3.01946	7.04638e-07	7.6042e-06
ENSMUSG00000003779	Kif20a	22.7209	28.261	248.064	165.63	25.491	206.847	-3.02169	4.91133e-10	9.08081e-09
ENSMUSG00000050370	Ch25h	13.6325	5.88771	92.4986	67.1238	9.76013	79.8112	-3.02777	2.05774e-05	0.00015918
ENSMUSG00000034028	Cd226	49.986	29.4386	437.266	217.063	39.7123	327.164	-3.04106	4.67339e-10	8.68479e-09
ENSMUSG00000043015	Nemp2	74.979	82.4279	820.715	475.097	78.7035	647.906	-3.04166	2.12764e-15	7.25095e-14
ENSMUSG00000047462	Gpr141b	23.857	20.0182	228.724	135.991	21.9376	182.357	-3.05481	4.53074e-09	7.27595e-08
ENSMUSG00000026669	Mcm10	26.129	14.1305	197.611	137.735	20.1298	167.673	-3.05578	1.3804e-08	2.03414e-07
ENSMUSG00000023919	Cenpq	19.3128	22.3733	223.678	125.53	20.843	174.604	-3.06741	1.06004e-08	1.59694e-07
ENSMUSG00000109799	Gm45515	12.4965	18.8407	166.497	96.7629	15.6686	131.63	-3.07279	2.17935e-07	2.58814e-06
ENSMUSG00000028965	Tnfrsf9	18.1767	10.5979	158.089	85.4303	14.3873	121.759	-3.07909	8.16257e-07	8.65696e-06
ENSMUSG00000045551	Fpr1	6.81627	8.24279	48.772	78.4564	7.52953	63.6142	-3.0794	6.26701e-05	0.000428413
ENSMUSG00000026271	Gpr35	27.2651	18.8407	219.474	172.604	23.0529	196.039	-3.08654	2.46041e-10	4.76705e-09
ENSMUSG00000067610	Klri1	3.40814	4.71017	37.8403	31.3826	4.05915	34.6115	-3.09414	0.00181135	0.0079997
ENSMUSG00000069893	9930111J21Rik1	45.4418	58.8771	506.22	391.41	52.1595	448.815	-3.10616	2.44506e-16	9.11996e-15
ENSMUSG00000118433	Gm50471	4.54418	1.17754	27.7496	21.7935	2.86086	24.7715	-3.10734	0.00928719	0.0318112
ENSMUSG00000051517	Arhgef39	4.54418	8.24279	66.4308	43.5869	6.39349	55.0089	-3.10863	0.000171234	0.00103408
ENSMUSG00000040658	Dnph1	2.27209	3.53263	28.5905	21.7935	2.90236	25.192	-3.12064	0.00699402	0.0251331
ENSMUSG00000034171	Faah	57.9383	41.214	528.083	339.106	49.5761	433.595	-3.12768	2.62928e-14	8.03177e-13
ENSMUSG00000023393	Slc17a9	43.1697	38.8589	403.63	319.928	41.0143	361.779	-3.14059	1.57605e-15	5.42414e-14
ENSMUSG00000043243	Niban3	24.993	21.1958	214.429	194.398	23.0944	204.413	-3.14511	1.80682e-11	4.08733e-10
ENSMUSG00000031196	F8	73.843	74.1852	798.852	512.582	74.0141	655.717	-3.14734	8.68036e-18	3.62548e-16
ENSMUSG00000108732	2310043P16Rik	26.129	9.42034	208.542	108.967	17.7747	158.755	-3.15549	3.28729e-07	3.78572e-06
ENSMUSG00000108980	Gm45155	2.27209	3.53263	32.795	19.1782	2.90236	25.9866	-3.16565	0.0063948	0.0234304
ENSMUSG00000043811	Rtn4r	4.54418	12.953	53.8174	102.865	8.74857	78.3412	-3.16705	3.75134e-05	0.000271709
ENSMUSG00000033730	Egr3	59.0744	31.7936	491.084	329.517	45.434	410.3	-3.17305	3.0035e-13	8.16212e-12
ENSMUSG00000006411	Nectin4	15.9046	21.1958	93.3395	242.343	18.5502	167.841	-3.17831	1.84693e-07	2.22493e-06
ENSMUSG00000032561	Acpp	20.4488	11.7754	181.634	112.454	16.1121	147.044	-3.18772	3.24309e-08	4.45579e-07
ENSMUSG00000034164	Emid1	15.9046	22.3733	195.929	153.426	19.139	174.677	-3.19199	4.4728e-10	8.3491e-09
ENSMUSG00000052435	Cebpe	5.68023	5.88771	39.5221	66.2521	5.78397	52.8871	-3.19257	0.000161868	0.000985477
ENSMUSG00000038943	Prc1	29.5372	34.1487	384.29	197.885	31.843	291.087	-3.1932	3.04369e-11	6.64121e-10
ENSMUSG00000016028	Celsr1	60.2104	77.7178	650.013	614.575	68.9641	632.294	-3.19758	3.24254e-21	1.77618e-19
ENSMUSG00000039985	Sinhcaf	53.3941	30.6161	490.243	286.802	42.0051	388.522	-3.2078	1.36568e-12	3.48923e-11
ENSMUSG00000062510	Nsl1	12.4965	10.5979	121.089	92.4042	11.5472	106.747	-3.20785	1.93078e-07	2.3166e-06
ENSMUSG00000033192	Lpcat2	39.7616	31.7936	314.495	347.824	35.7776	331.159	-3.20934	1.43323e-15	4.9489e-14
ENSMUSG00000029553	Tfec	14.7686	8.24279	121.089	92.4042	11.5057	106.747	-3.21086	3.50913e-07	4.0103e-06
ENSMUSG00000047798	Cd300lf	31.8093	17.6631	236.292	224.908	24.7362	230.6	-3.21805	1.04769e-11	2.44403e-10
ENSMUSG00000028927	Padi2	40.8976	35.3263	400.267	309.467	38.112	354.867	-3.21846	1.23008e-15	4.29708e-14
ENSMUSG00000037313	Tacc3	30.6732	37.6813	380.926	255.419	34.1773	318.173	-3.21973	1.08083e-13	3.0939e-12
ENSMUSG00000097636	Mirt1	32.9453	20.0182	285.064	209.217	26.4818	247.141	-3.22025	8.55293e-12	2.01316e-10
ENSMUSG00000102593	Gm38384	1.13605	5.88771	39.5221	26.1521	3.51188	32.8371	-3.23333	0.00312714	0.0127532
ENSMUSG00000032028	Nxpe2	19.3128	32.9712	304.405	186.552	26.142	245.478	-3.23354	7.12399e-11	1.48328e-09
ENSMUSG00000033998	Kcnk1	2.27209	11.7754	45.4084	87.1738	7.02376	66.2911	-3.24485	0.000161385	0.000983112
ENSMUSG00000026638	Irf6	21.5849	22.3733	153.043	264.137	21.9791	208.59	-3.24635	1.94104e-10	3.81274e-09
ENSMUSG00000025473	Adam8	47.7139	42.3915	394.38	462.021	45.0527	428.201	-3.24803	3.39662e-18	1.46243e-16
ENSMUSG00000024697	Gna14	5.68023	11.7754	56.3401	110.711	8.72782	83.5254	-3.26178	1.11223e-05	9.16637e-05
ENSMUSG00000038572	Bpifb5	4.54418	5.88771	51.2947	48.8173	5.21595	50.056	-3.26422	0.000132987	0.000829438
ENSMUSG00000036295	Lrrn3	12.4965	3.53263	79.8852	76.713	8.01456	78.2991	-3.28217	1.22195e-05	9.98024e-05
ENSMUSG00000015709	Arnt2	11.3605	14.1305	132.862	115.069	12.7455	123.966	-3.28325	1.47433e-08	2.15888e-07
ENSMUSG00000002297	Dbf4	28.4011	35.3263	396.062	224.037	31.8637	310.049	-3.2836	1.36367e-12	3.48837e-11
ENSMUSG00000032221	Mns1	12.4965	12.953	160.611	88.9173	12.7247	124.764	-3.29405	8.78462e-08	1.1229e-06
ENSMUSG00000061972	Olfr99	5.68023	3.53263	58.8627	33.126	4.60643	45.9944	-3.31733	0.000333478	0.00184991
ENSMUSG00000026435	Slc45a3	9.08836	35.3263	146.316	295.519	22.2073	220.918	-3.31803	8.3335e-08	1.0685e-06
ENSMUSG00000056895	H2bu2	4.54418	1.17754	26.0678	31.3826	2.86086	28.7252	-3.32015	0.00376417	0.0149659
ENSMUSG00000031971	Ccsap	2.27209	10.5979	73.158	55.7912	6.43499	64.4746	-3.33213	6.78011e-05	0.00045899
ENSMUSG00000104876	Trdc	18.1767	9.42034	174.906	106.352	13.7985	140.629	-3.34637	2.67363e-08	3.74972e-07
ENSMUSG00000037370	Enpp1	38.6255	69.475	644.968	459.406	54.0503	552.187	-3.35467	1.12508e-16	4.36776e-15
ENSMUSG00000070354	Evi2	6.81627	5.88771	66.4308	63.6369	6.35199	65.0339	-3.35501	1.23358e-05	0.000100595
ENSMUSG00000001763	Tspan33	20.4488	11.7754	182.475	148.195	16.1121	165.335	-3.35642	4.68829e-10	8.69703e-09
ENSMUSG00000031662	Snx20	90.8836	60.0546	823.238	724.414	75.4691	773.826	-3.35683	2.17929e-22	1.32563e-20
ENSMUSG00000010175	Prox1	9.08836	31.7936	232.928	184.808	20.441	208.868	-3.35766	3.27302e-09	5.34227e-08
ENSMUSG00000087141	Plcxd2	27.2651	28.261	377.562	191.782	27.7631	284.672	-3.35847	7.44867e-12	1.76117e-10
ENSMUSG00000021678	F2rl1	21.5849	21.1958	233.769	205.73	21.3903	219.75	-3.36081	5.52107e-13	1.4661e-11
ENSMUSG00000074342	I830077J02Rik	22.7209	11.7754	161.452	195.269	17.2482	178.361	-3.36687	2.29497e-10	4.46719e-09
ENSMUSG00000055629	B4galnt4	10.2244	10.5979	114.362	101.122	10.4111	107.742	-3.37169	4.92621e-08	6.58095e-07
ENSMUSG00000027399	Il1a	5.68023	4.71017	75.6807	32.2543	5.1952	53.9675	-3.37633	0.00016065	0.000980346
ENSMUSG00000060044	Tmem26	10.2244	25.9059	214.429	161.272	18.0652	187.85	-3.38254	8.74133e-10	1.55274e-08
ENSMUSG00000027776	Il12a	6.81627	0	43.7266	28.7674	3.40814	36.247	-3.4001	0.00309825	0.012645
ENSMUSG00000074419	Pira13	4.54418	4.71017	64.749	33.126	4.62718	48.9375	-3.40348	0.00019507	0.00115502
ENSMUSG00000008318	Relt	39.7616	40.0364	489.402	362.643	39.899	426.022	-3.41666	2.44302e-18	1.0717e-16
ENSMUSG00000009292	Trpm2	38.6255	35.3263	426.334	365.258	36.9759	395.796	-3.41976	1.02899e-18	4.67065e-17
ENSMUSG00000052087	Rgs14	54.5302	51.8119	669.354	468.995	53.171	569.174	-3.42009	2.96884e-20	1.5339e-18
ENSMUSG00000021569	Trip13	12.4965	4.71017	117.725	67.9956	8.60333	92.8605	-3.42746	2.27694e-06	2.20166e-05
ENSMUSG00000022408	Fam83f	2.27209	11.7754	79.8852	70.6108	7.02376	75.248	-3.429	1.74001e-05	0.000137136
ENSMUSG00000031362	Xlr4c	4.54418	5.88771	78.2034	33.9978	5.21595	56.1006	-3.42913	0.000107033	0.00068828
ENSMUSG00000060131	Atp8b4	51.1221	47.1017	535.651	529.145	49.1119	532.398	-3.43801	1.2008e-22	7.48359e-21
ENSMUSG00000042262	Ccr8	5.68023	1.17754	52.1356	22.6652	3.42889	37.4004	-3.43998	0.00159143	0.00716142
ENSMUSG00000074677	Sirpb1c	10.2244	7.06525	78.2034	110.711	8.64483	94.4571	-3.44726	3.56148e-07	4.06568e-06
ENSMUSG00000031886	Ces2e	10.2244	2.35508	79.8852	59.2782	6.28975	69.5817	-3.46056	2.30168e-05	0.000176033
ENSMUSG00000042097	Zfp239	9.08836	5.88771	87.4532	79.3282	7.48804	83.3907	-3.47456	8.3255e-07	8.81189e-06
ENSMUSG00000030789	Itgax	24.993	40.0364	359.063	365.258	32.5147	362.161	-3.47962	3.89757e-17	1.5594e-15
ENSMUSG00000040350	Trim7	23.857	100.091	886.305	513.454	61.974	699.879	-3.49945	7.517e-11	1.55275e-09
ENSMUSG00000024036	Slc37a1	30.6732	22.3733	362.426	238.856	26.5233	300.641	-3.50144	1.94138e-14	6.02721e-13
ENSMUSG00000019737	Syne4	3.40814	8.24279	44.5675	88.0456	5.82547	66.3065	-3.51323	2.78835e-05	0.000208976
ENSMUSG00000073405	H2-T-ps	12.4965	8.24279	144.634	93.276	10.3696	118.955	-3.51785	2.65856e-08	3.73359e-07
ENSMUSG00000044966	Fbxo48	3.40814	4.71017	57.181	36.613	4.05915	46.897	-3.53277	0.000146625	0.000903453
ENSMUSG00000068696	Gpr88	5.68023	9.42034	97.544	77.5847	7.55028	87.5643	-3.5391	4.83159e-07	5.39206e-06
ENSMUSG00000045751	Mms22l	23.857	16.4856	283.382	186.552	20.1713	234.967	-3.54044	1.02371e-12	2.64785e-11
ENSMUSG00000025058	Tasl	13.6325	16.4856	231.247	122.915	15.0591	177.081	-3.55701	3.86668e-10	7.27611e-09
ENSMUSG00000017861	Mybl2	12.4965	16.4856	206.02	135.119	14.491	170.57	-3.55893	1.06474e-10	2.16097e-09
ENSMUSG00000060509	Xcr1	18.1767	11.7754	202.656	151.682	14.9761	177.169	-3.56213	3.20094e-11	6.96255e-10
ENSMUSG00000033508	Asprv1	10.2244	7.06525	72.3171	132.504	8.64483	102.411	-3.56383	2.421e-07	2.85245e-06
ENSMUSG00000020808	Pimreg	2.27209	7.06525	58.0219	52.3043	4.66867	55.1631	-3.56947	5.05752e-05	0.000354535
ENSMUSG00000039747	Orai2	86.3395	67.1199	1064.57	767.13	76.7297	915.852	-3.57657	2.65409e-25	1.96939e-23
ENSMUSG00000022945	Chaf1b	21.5849	3.53263	181.634	119.428	12.5587	150.531	-3.5771	1.6844e-07	2.04277e-06
ENSMUSG00000019942	Cdk1	37.4895	9.42034	347.29	214.448	23.4549	280.869	-3.57786	4.0151e-10	7.52943e-09
ENSMUSG00000022372	Sla	126.101	101.269	1635.54	1101.01	113.685	1368.27	-3.58882	4.15059e-27	3.44647e-25
ENSMUSG00000033031	Cip2a	24.993	29.4386	475.947	180.45	27.2158	328.199	-3.59289	1.64021e-11	3.73059e-10
ENSMUSG00000056025	Clca3a1	54.5302	40.0364	599.559	546.58	47.2833	573.069	-3.59803	1.86711e-23	1.25222e-21
ENSMUSG00000066677	Ifi208	53.3941	65.9424	742.512	706.98	59.6682	724.746	-3.6033	3.98914e-27	3.32561e-25
ENSMUSG00000040061	Plcb2	64.7546	62.4097	862.76	696.519	63.5822	779.639	-3.61604	2.55739e-27	2.17534e-25
ENSMUSG00000055612	Cdca7	29.5372	40.0364	538.174	314.697	34.7868	426.436	-3.6171	1.3771e-16	5.26796e-15
ENSMUSG00000073538	E330020D12Rik	5.68023	9.42034	119.407	66.2521	7.55028	92.8297	-3.62341	5.47687e-07	6.04768e-06
ENSMUSG00000030142	Clec4e	12.4965	4.71017	112.68	101.122	8.60333	106.901	-3.62971	6.59954e-08	8.62556e-07
ENSMUSG00000024521	Pmaip1	29.5372	15.308	318.7	237.985	22.4226	278.342	-3.63084	3.84066e-14	1.14972e-12
ENSMUSG00000050010	Shisa3	32.9453	20.0182	375.881	283.315	26.4818	329.598	-3.63539	3.54821e-16	1.30029e-14
ENSMUSG00000053318	Slamf8	17.0407	5.88771	147.998	138.606	11.4642	143.302	-3.63831	2.47219e-09	4.08615e-08
ENSMUSG00000017652	Cd40	34.0814	45.9241	596.196	406.23	40.0028	501.213	-3.64861	8.34649e-20	4.12885e-18
ENSMUSG00000092415	Gm20513	1.13605	2.35508	22.7042	20.9217	1.74556	21.813	-3.64863	0.00633669	0.0232664
ENSMUSG00000038304	Cd160	11.3605	2.35508	122.771	51.4325	6.85777	87.1017	-3.66035	1.00319e-05	8.3512e-05
ENSMUSG00000069910	Spdl1	6.81627	11.7754	138.748	95.8912	9.29585	117.32	-3.66129	1.35285e-08	1.99777e-07
ENSMUSG00000026070	Il18r1	48.85	35.3263	628.15	441.971	42.0881	535.06	-3.66702	9.16567e-21	4.86781e-19
ENSMUSG00000028838	Extl1	18.1767	29.4386	332.995	276.341	23.8076	304.668	-3.68032	2.50063e-16	9.31062e-15
ENSMUSG00000073705	Cenps	4.54418	3.53263	73.158	30.5108	4.0384	51.8344	-3.68101	0.000104576	0.000674764
ENSMUSG00000030677	Kif22	24.993	11.7754	270.769	202.243	18.3842	236.506	-3.68173	6.3836e-13	1.68021e-11
ENSMUSG00000087107	AI662270	35.2174	32.9712	548.264	330.389	34.0943	439.327	-3.68759	4.60365e-18	1.96194e-16
ENSMUSG00000027331	Knstrn	13.6325	12.953	190.883	153.426	13.2928	172.155	-3.69482	6.08558e-12	1.45699e-10
ENSMUSG00000045362	Tnfrsf26	22.7209	9.42034	280.859	137.735	16.0706	209.297	-3.69951	3.75227e-10	7.07992e-09
ENSMUSG00000037946	Fgd3	62.4825	78.8953	1042.71	795.025	70.6889	918.868	-3.70116	6.34171e-28	5.57564e-26
ENSMUSG00000100658	F730311O21Rik	21.5849	24.7284	387.653	216.191	23.1566	301.922	-3.70556	1.81906e-14	5.68117e-13
ENSMUSG00000047415	Gpr68	30.6732	29.4386	447.357	337.363	30.0559	392.36	-3.70638	1.44517e-19	7.04899e-18
ENSMUSG00000115902	D730005E14Rik	15.9046	20.0182	246.383	223.165	17.9614	234.774	-3.70973	6.24286e-15	2.04752e-13
ENSMUSG00000085363	Gm15478	6.81627	8.24279	129.498	68.8673	7.52953	99.1827	-3.72105	1.72803e-07	2.09011e-06
ENSMUSG00000017390	Aldoc	15.9046	22.3733	75.6807	429.767	19.139	252.724	-3.72367	1.29936e-07	1.60883e-06
ENSMUSG00000006930	Hap1	12.4965	21.1958	248.064	197.013	16.8461	222.539	-3.72667	1.49816e-13	4.23063e-12
ENSMUSG00000027699	Ect2	14.7686	18.8407	296.836	149.067	16.8046	222.952	-3.73132	9.36917e-12	2.19787e-10
ENSMUSG00000030149	Klrk1	30.6732	21.1958	380.085	314.697	25.9345	347.391	-3.74178	2.25314e-18	9.9048e-17
ENSMUSG00000022496	Tnfrsf17	7.95232	3.53263	72.3171	82.8151	5.74247	77.5661	-3.7503	1.03227e-06	1.07411e-05
ENSMUSG00000051220	Ercc6l	15.9046	11.7754	240.496	132.504	13.84	186.5	-3.7509	3.97092e-11	8.53095e-10
ENSMUSG00000034438	Gbp8	38.6255	37.6813	627.309	406.23	38.1534	516.769	-3.75968	6.58889e-21	3.53519e-19
ENSMUSG00000030800	Prss8	4.54418	8.24279	37.8403	135.119	6.39349	86.4799	-3.76028	9.44455e-06	7.90825e-05
ENSMUSG00000009097	Tbx1	5.68023	16.4856	103.43	196.141	11.0829	149.786	-3.76139	8.60577e-09	1.31346e-07
ENSMUSG00000046598	Bdh1	10.2244	15.308	207.701	139.478	12.7662	173.59	-3.76791	2.03206e-11	4.54768e-10
ENSMUSG00000029075	Tnfrsf4	13.6325	14.1305	238.815	140.35	13.8815	189.582	-3.77207	9.60324e-12	2.25026e-10
ENSMUSG00000020310	Madcam1	10.2244	2.35508	114.362	58.4065	6.28975	86.3842	-3.77267	3.0104e-06	2.82478e-05
ENSMUSG00000000244	Tspan32	51.1221	57.6996	909.009	582.321	54.4108	745.665	-3.77711	4.79574e-24	3.34503e-22
ENSMUSG00000112824	Gm47917	1.13605	2.35508	26.0678	21.7935	1.74556	23.9306	-3.78255	0.00383287	0.0151957
ENSMUSG00000054293	P2ry10b	21.5849	9.42034	248.905	179.578	15.5026	214.242	-3.78451	2.39326e-12	5.99031e-11
ENSMUSG00000095788	Sirpb1a	0	10.5979	58.8627	86.3021	5.29894	72.5824	-3.78647	5.63082e-05	0.000391185
ENSMUSG00000005233	Spc25	3.40814	14.1305	153.884	87.1738	8.76932	120.529	-3.78787	1.14422e-07	1.43284e-06
ENSMUSG00000024737	Slc15a3	31.8093	36.5038	520.515	422.793	34.1565	471.654	-3.78827	9.62386e-23	6.06564e-21
ENSMUSG00000027306	Nusap1	34.0814	27.0835	590.309	258.906	30.5824	424.608	-3.79472	8.32937e-15	2.69802e-13
ENSMUSG00000053101	Gpr141	4.54418	12.953	124.453	117.685	8.74857	121.069	-3.79682	6.89801e-09	1.07477e-07
ENSMUSG00000072082	Ccnf	22.7209	11.7754	300.2	180.45	17.2482	240.325	-3.79741	8.63001e-13	2.24327e-11
ENSMUSG00000040270	Bach2	106.788	74.1852	1644.79	875.225	90.4867	1260.01	-3.79891	1.45207e-22	8.93665e-21
ENSMUSG00000027834	Serpini1	12.4965	5.88771	143.793	113.326	9.19211	128.56	-3.80142	1.79258e-09	3.05206e-08
ENSMUSG00000031506	Ptpn7	81.7953	62.4097	1214.25	810.716	72.1025	1012.49	-3.81097	6.47496e-27	5.31328e-25
ENSMUSG00000069609	Cd300ld4	5.68023	10.5979	136.225	92.4042	8.13905	114.315	-3.81622	1.1053e-08	1.66033e-07
ENSMUSG00000027398	Il1b	4.54418	8.24279	82.4078	97.6347	6.39349	90.0213	-3.81951	1.19313e-07	1.48774e-06
ENSMUSG00000026980	Ly75	63.6186	49.4568	1054.48	545.708	56.5377	800.096	-3.82228	1.24364e-20	6.53847e-19
ENSMUSG00000096638	Ighv2-9	3.40814	3.53263	54.6583	43.5869	3.47038	49.1226	-3.82368	4.53833e-05	0.000321849
ENSMUSG00000034266	Batf	12.4965	11.7754	190.043	154.298	12.136	172.17	-3.82622	2.41587e-12	6.02583e-11
ENSMUSG00000073491	Ifi213	69.2988	73.0076	900.6	1127.16	71.1532	1013.88	-3.83294	1.42142e-32	1.70938e-30
ENSMUSG00000001444	Tbx21	9.08836	5.88771	90.8168	125.53	7.48804	108.174	-3.84947	1.16672e-08	1.74384e-07
ENSMUSG00000079553	Kifc1	20.4488	3.53263	181.634	166.502	11.9907	174.068	-3.85248	1.70944e-09	2.91524e-08
ENSMUSG00000054342	Kcnn4	40.8976	45.9241	633.195	621.549	43.4109	627.372	-3.85376	2.72813e-28	2.5148e-26
ENSMUSG00000118590	Gm15433	4.54418	1.17754	44.5675	39.2282	2.86086	41.8979	-3.86385	0.00019796	0.00116981
ENSMUSG00000043931	Gimap7	17.0407	21.1958	332.995	224.908	19.1182	278.952	-3.86841	6.3675e-16	2.2776e-14
ENSMUSG00000044867	Gimap1os	2.27209	8.24279	89.9759	63.6369	5.25744	76.8064	-3.87674	1.85535e-06	1.83475e-05
ENSMUSG00000023015	Racgap1	49.986	34.1487	765.216	478.584	42.0674	621.9	-3.88458	9.05308e-22	5.2915e-20
ENSMUSG00000092517	Art2a	6.81627	7.06525	149.68	55.7912	6.94076	102.735	-3.8884	3.48877e-07	3.98921e-06
ENSMUSG00000023903	Mmp25	24.993	16.4856	313.654	303.365	20.7393	308.51	-3.89248	2.94383e-18	1.278e-16
ENSMUSG00000008496	Pou2f2	89.7476	74.1852	1519.5	940.605	81.9664	1230.05	-3.90711	2.90726e-28	2.65652e-26
ENSMUSG00000052749	Trim30b	18.1767	21.1958	305.245	285.93	19.6862	295.588	-3.90931	1.91828e-18	8.50426e-17
ENSMUSG00000089844	A530032D15Rik	3.40814	3.53263	53.8174	50.5608	3.47038	52.1891	-3.91091	2.15944e-05	0.000166248
ENSMUSG00000089683	4930570N18Rik	3.40814	0	34.4768	17.4348	1.70407	25.9558	-3.91534	0.00432631	0.0168456
ENSMUSG00000040675	Mthfd1l	31.8093	34.1487	624.786	372.232	32.979	498.509	-3.91848	1.84375e-20	9.62107e-19
ENSMUSG00000052336	Cx3cr1	21.5849	20.0182	308.609	322.543	20.8015	315.576	-3.92274	2.04374e-19	9.85373e-18
ENSMUSG00000032591	Mst1	9.08836	0	79.8852	59.2782	4.54418	69.5817	-3.9248	2.90386e-05	0.00021678
ENSMUSG00000001403	Ube2c	24.993	24.7284	486.879	271.111	24.8607	378.995	-3.93039	2.26096e-17	9.2766e-16
ENSMUSG00000061852	Gm53056	2.27209	1.17754	35.3176	17.4348	1.72482	26.3762	-3.93046	0.00258733	0.0108736
ENSMUSG00000026080	Chst10	19.3128	14.1305	322.904	191.782	16.7216	257.343	-3.94241	1.65676e-14	5.21319e-13
ENSMUSG00000029275	Gfi1	2.27209	7.06525	48.772	94.1477	4.66867	71.4599	-3.94259	4.9357e-06	4.425e-05
ENSMUSG00000022602	Arc	11.3605	12.953	227.042	154.298	12.1567	190.67	-3.97232	5.1676e-13	1.381e-11
ENSMUSG00000100529	Gm19261	0	2.35508	22.7042	13.9478	1.17754	18.326	-3.97569	0.0125331	0.0409261
ENSMUSG00000049744	Arhgap15	54.5302	52.9894	1111.67	589.295	53.7598	850.48	-3.98371	2.4679e-23	1.6342e-21
ENSMUSG00000112063	Gm32220	2.27209	0	27.7496	8.71738	1.13605	18.2335	-3.9907	0.0153174	0.0480896
ENSMUSG00000036931	Nfkbid	26.129	11.7754	350.654	258.034	18.9522	304.344	-4.0013	4.58783e-16	1.66091e-14
ENSMUSG00000087624	9230111E07Rik	0	2.35508	16.8179	20.9217	1.17754	18.8698	-4.01761	0.0105394	0.0354389
ENSMUSG00000022218	Tgm1	12.4965	27.0835	292.632	349.567	19.79	321.099	-4.0242	2.45383e-17	9.97018e-16
ENSMUSG00000001517	Foxm1	14.7686	20.0182	360.745	208.345	17.3934	284.545	-4.03395	1.68396e-15	5.76707e-14
ENSMUSG00000027843	Ptpn22	72.7069	43.5691	1178.94	732.26	58.138	955.598	-4.03739	6.38769e-25	4.64105e-23
ENSMUSG00000032254	Kif23	30.6732	17.6631	511.265	286.802	24.1682	399.033	-4.043	2.75612e-17	1.11336e-15
ENSMUSG00000026358	Rgs1	22.7209	12.953	430.539	159.528	17.8369	295.034	-4.04583	3.41709e-12	8.41207e-11
ENSMUSG00000030365	Clec2i	39.7616	37.6813	847.624	431.51	38.7215	639.567	-4.04584	5.17048e-21	2.78846e-19
ENSMUSG00000026073	Il1r2	11.3605	5.88771	151.361	136.863	8.62408	144.112	-4.05827	3.82499e-11	8.2259e-10
ENSMUSG00000020399	Havcr2	13.6325	9.42034	197.611	190.039	11.5264	193.825	-4.06922	3.74424e-14	1.12894e-12
ENSMUSG00000058755	Osm	6.81627	1.17754	75.6807	60.1499	3.99691	67.9153	-4.07675	4.02849e-06	3.68764e-05
ENSMUSG00000048621	Gm6377	4.54418	10.5979	175.747	79.3282	7.57103	127.538	-4.07964	1.229e-08	1.82907e-07
ENSMUSG00000079845	Xlr4a	4.54418	8.24279	146.316	70.6108	6.39349	108.463	-4.08874	3.48018e-08	4.75345e-07
ENSMUSG00000014543	Klra17	2.27209	1.17754	27.7496	31.3826	1.72482	29.5661	-4.09416	0.00100178	0.00481889
ENSMUSG00000029299	Abcg3	40.8976	34.1487	822.397	461.149	37.5232	641.773	-4.09562	9.07031e-23	5.7514e-21
ENSMUSG00000090164	BC035044	22.7209	8.24279	365.79	165.63	15.4819	265.71	-4.09703	4.51869e-12	1.09691e-10
ENSMUSG00000072437	Nanos1	6.81627	3.53263	119.407	58.4065	5.17445	88.9069	-4.09883	3.01284e-07	3.49466e-06
ENSMUSG00000027323	Rad51	4.54418	15.308	188.361	150.811	9.92611	169.586	-4.10169	2.5388e-11	5.58029e-10
ENSMUSG00000078783	Gm9733	2.27209	2.35508	41.2039	38.3565	2.31359	39.7802	-4.1042	0.000142385	0.000881221
ENSMUSG00000011008	Mcoln2	15.9046	37.6813	464.175	455.047	26.793	459.611	-4.10448	1.37889e-20	7.21329e-19
ENSMUSG00000041754	Trem3	0	3.53263	23.5451	36.613	1.76631	30.0791	-4.10478	0.00166122	0.00742759
ENSMUSG00000037341	Slc9a7	18.1767	22.3733	431.38	266.752	20.275	349.066	-4.10706	2.11858e-18	9.33288e-17
ENSMUSG00000031389	Arhgap4	88.6116	88.3157	1709.54	1359.91	88.4636	1534.73	-4.11679	2.1016e-41	5.05472e-39
ENSMUSG00000051354	Samd3	11.3605	1.17754	120.248	100.25	6.269	110.249	-4.12605	6.51481e-08	8.52015e-07
ENSMUSG00000019992	Mtfr2	1.13605	5.88771	78.2034	43.5869	3.51188	60.8951	-4.12621	1.42271e-05	0.000114353
ENSMUSG00000034959	Rubcnl	39.7616	24.7284	715.603	427.152	32.245	571.377	-4.14541	8.35472e-22	4.89699e-20
ENSMUSG00000036067	Slc2a6	15.9046	11.7754	279.178	215.319	13.84	247.248	-4.1572	1.72737e-16	6.53621e-15
ENSMUSG00000074785	Plxnc1	93.1557	85.9606	2031.61	1168.13	89.5582	1599.87	-4.15885	1.80971e-31	2.10379e-29
ENSMUSG00000022385	Gtse1	7.95232	9.42034	175.747	137.735	8.68633	156.741	-4.17489	3.03301e-12	7.49299e-11
ENSMUSG00000067768	Xlr4b	7.95232	8.24279	201.815	91.5325	8.09756	146.674	-4.17959	5.16939e-10	9.52196e-09
ENSMUSG00000022582	Ly6g	3.40814	2.35508	34.4768	70.6108	2.88161	52.5438	-4.18525	2.83511e-05	0.000211949
ENSMUSG00000093906	Igkv9-129	0	2.35508	27.7496	14.8195	1.17754	21.2846	-4.19238	0.00656954	0.0239395
ENSMUSG00000101279	Gm18342	1.13605	2.35508	42.8857	20.9217	1.74556	31.9037	-4.19812	0.000800974	0.00395759
ENSMUSG00000072621	Slfn10-ps	5.68023	9.42034	196.77	80.1999	7.55028	138.485	-4.20058	3.20174e-09	5.23409e-08
ENSMUSG00000032528	Vipr1	18.1767	16.4856	313.654	326.03	17.3312	319.842	-4.20525	8.14235e-21	4.34639e-19
ENSMUSG00000032281	Acsbg1	12.4965	3.53263	131.18	166.502	8.01456	148.841	-4.20727	1.01843e-10	2.07705e-09
ENSMUSG00000020953	Coch	1.13605	30.6161	403.63	183.937	15.8761	293.784	-4.21103	0.0147979	0.0467515
ENSMUSG00000114585	Gm32401	6.81627	0	85.7714	41.8434	3.40814	63.8074	-4.21372	2.96546e-05	0.000220905
ENSMUSG00000034177	Rnf43	12.4965	4.71017	150.52	173.476	8.60333	161.998	-4.22848	5.72289e-12	1.37172e-10
ENSMUSG00000006345	Ggt1	3.40814	4.71017	79.0443	73.226	4.05915	76.1351	-4.23195	2.34215e-07	2.76577e-06
ENSMUSG00000037466	Tedc1	7.95232	12.953	222.838	170.861	10.4526	196.849	-4.23867	3.76757e-14	1.13041e-12
ENSMUSG00000085786	Gm15987	14.7686	11.7754	301.041	202.243	13.272	251.642	-4.24363	2.78232e-16	1.03045e-14
ENSMUSG00000061414	Cracr2a	13.6325	20.0182	363.267	273.726	16.8254	318.497	-4.24511	2.40057e-19	1.15476e-17
ENSMUSG00000005251	Ripk4	4.54418	8.24279	63.0672	179.578	6.39349	121.323	-4.24931	3.38006e-08	4.62575e-07
ENSMUSG00000076461	Trbv1	3.40814	1.17754	53.8174	33.9978	2.29284	43.9076	-4.25179	8.71935e-05	0.000575197
ENSMUSG00000028874	Fgr	43.1697	41.214	801.374	811.588	42.1919	806.481	-4.25636	3.57979e-36	5.76208e-34
ENSMUSG00000026415	Fcamr	10.2244	4.71017	187.52	99.3781	7.46729	143.449	-4.25915	3.5498e-10	6.70999e-09
ENSMUSG00000048534	Jaml	23.857	10.5979	342.245	319.928	17.2274	331.086	-4.25976	4.43889e-19	2.09198e-17
ENSMUSG00000076536	Igkv4-86	3.40814	1.17754	37.8403	50.5608	2.29284	44.2006	-4.2607	7.18273e-05	0.000482499
ENSMUSG00000071178	Serpina1b	9.08836	4.71017	153.884	111.582	6.89927	132.733	-4.26145	1.34046e-10	2.68155e-09
ENSMUSG00000057948	Unc13d	36.3535	40.0364	761.011	704.364	38.1949	732.688	-4.26229	3.82076e-34	5.12496e-32
ENSMUSG00000097705	Gm26740	15.9046	20.0182	450.72	237.985	17.9614	344.352	-4.26239	2.14216e-17	8.82376e-16
ENSMUSG00000075033	Nxpe3	44.3058	34.1487	946.849	561.399	39.2272	754.124	-4.26392	3.13795e-26	2.50617e-24
ENSMUSG00000048922	Cdca2	5.68023	14.1305	251.428	128.146	9.90537	189.787	-4.26555	1.34101e-11	3.09378e-10
ENSMUSG00000028337	Coro2a	60.2104	64.7648	1026.73	1390.42	62.4876	1208.58	-4.27382	5.97576e-38	1.03341e-35
ENSMUSG00000041272	Tox	18.1767	12.953	395.221	209.217	15.5648	302.219	-4.27755	3.29029e-16	1.21214e-14
ENSMUSG00000027636	Sla2	5.68023	10.5979	189.202	126.402	8.13905	157.802	-4.28166	9.33589e-12	2.19252e-10
ENSMUSG00000035455	Fignl1	11.3605	12.953	320.382	153.426	12.1567	236.904	-4.28555	9.60405e-14	2.75672e-12
ENSMUSG00000030336	Cd27	22.7209	30.6161	620.582	423.665	26.6685	522.123	-4.29289	9.98478e-25	7.15519e-23
ENSMUSG00000069873	4930438A08Rik	3.40814	0	35.3176	32.2543	1.70407	33.786	-4.29346	0.000632756	0.00323648
ENSMUSG00000026979	Psd4	94.2918	85.9606	2068.61	1474.11	90.1262	1771.36	-4.29653	1.5089e-41	3.67136e-39
ENSMUSG00000024795	Kif20b	10.2244	23.5508	482.675	183.065	16.8876	332.87	-4.30468	2.27682e-13	6.29359e-12
ENSMUSG00000102051	Ly6a2	6.81627	7.06525	120.248	156.913	6.94076	138.581	-4.31958	2.03466e-11	4.54864e-10
ENSMUSG00000036006	Ripor2	148.822	148.37	3572.13	2380.72	148.596	2976.42	-4.32414	3.64047e-44	1.07291e-41
ENSMUSG00000024910	Ctsw	24.993	14.1305	422.971	362.643	19.5618	392.807	-4.32435	2.54384e-22	1.53844e-20
ENSMUSG00000026594	Ralgps2	111.332	122.464	3061.7	1653.69	116.898	2357.7	-4.33428	6.13752e-34	8.07721e-32
ENSMUSG00000095028	Sirpb1b	1.13605	3.53263	42.8857	51.4325	2.33434	47.1591	-4.34488	3.77863e-05	0.000273497
ENSMUSG00000089929	Bcl2a1b	0	3.53263	33.6359	37.4847	1.76631	35.5603	-4.34765	0.00045597	0.0024427
ENSMUSG00000020493	Prr11	4.54418	11.7754	239.655	93.276	8.1598	166.466	-4.35624	5.6167e-10	1.03012e-08
ENSMUSG00000005364	Il5ra	7.95232	4.71017	165.657	95.0195	6.33124	130.338	-4.36018	3.76899e-10	7.10505e-09
ENSMUSG00000037202	Prf1	12.4965	7.06525	209.383	194.398	9.78088	201.89	-4.3634	4.99421e-15	1.65354e-13
ENSMUSG00000073145	Gm12000	2.27209	2.35508	66.4308	28.7674	2.31359	47.5991	-4.36359	5.66795e-05	0.000393373
ENSMUSG00000004110	Cacna1e	26.129	32.9712	735.784	490.789	29.5501	613.286	-4.37664	3.92654e-27	3.28652e-25
ENSMUSG00000116380	Gm39556	5.68023	2.35508	92.4986	75.8412	4.01766	84.1699	-4.38233	7.6923e-08	9.94817e-07
ENSMUSG00000038179	Slamf7	51.1221	40.0364	1224.35	679.084	45.5792	951.715	-4.38329	5.24818e-28	4.69308e-26
ENSMUSG00000031258	Xkrx	12.4965	2.35508	187.52	126.402	7.42579	156.961	-4.39276	1.19471e-10	2.40378e-09
ENSMUSG00000109675	Nxpe1-ps	3.40814	5.88771	119.407	76.713	4.64792	98.0601	-4.40352	1.29388e-08	1.91609e-07
ENSMUSG00000046807	Lrrc75b	5.68023	7.06525	68.9535	201.372	6.37274	135.163	-4.40762	5.12488e-09	8.13643e-08
ENSMUSG00000097352	C920009B18Rik	12.4965	8.24279	282.541	158.656	10.3696	220.599	-4.40851	2.96047e-14	8.99098e-13
ENSMUSG00000017400	Stac2	18.1767	21.1958	412.039	426.28	19.6862	419.16	-4.41325	1.09595e-25	8.36961e-24
ENSMUSG00000023505	Cdca3	13.6325	8.24279	295.155	173.476	10.9377	234.315	-4.41803	5.80017e-15	1.90831e-13
ENSMUSG00000061132	Blnk	62.4825	55.3445	1575	960.655	58.9135	1267.83	-4.42727	3.37134e-34	4.58086e-32
ENSMUSG00000039153	Runx2	14.7686	14.1305	301.041	321.671	14.4495	311.356	-4.42912	3.19312e-21	1.7537e-19
ENSMUSG00000026981	Il1rn	4.54418	4.71017	88.2941	112.454	4.62718	100.374	-4.43923	3.75408e-09	6.09893e-08
ENSMUSG00000048721	Fndc9	5.68023	0	71.4762	53.176	2.84011	62.3261	-4.44062	8.90183e-06	7.48977e-05
ENSMUSG00000096001	2610528A11Rik	2.27209	2.35508	64.749	35.7413	2.31359	50.2451	-4.44152	2.38649e-05	0.000181921
ENSMUSG00000117872	A530088E08Rik	1.13605	5.88771	86.6123	65.3804	3.51188	75.9963	-4.44668	4.96953e-07	5.53125e-06
ENSMUSG00000026835	Fcnb	4.54418	1.17754	41.2039	84.5586	2.86086	62.8813	-4.4484	6.13496e-06	5.37805e-05
ENSMUSG00000009092	Derl3	26.129	11.7754	444.834	389.667	18.9522	417.251	-4.45593	1.60398e-22	9.81382e-21
ENSMUSG00000049608	Gpr55	2.27209	9.42034	138.748	117.685	5.84621	128.216	-4.46437	3.1653e-10	6.03223e-09
ENSMUSG00000031551	Ido1	1.13605	9.42034	151.361	80.1999	5.27819	115.781	-4.46634	2.45756e-08	3.47228e-07
ENSMUSG00000034917	Tjp3	12.4965	10.5979	172.384	341.721	11.5472	257.053	-4.47513	2.8922e-15	9.77696e-14
ENSMUSG00000090103	Gm16094	3.40814	0	47.0902	29.6391	1.70407	38.3646	-4.47666	0.000281157	0.00159049
ENSMUSG00000045273	Cenph	0	4.71017	67.2717	36.613	2.35508	51.9424	-4.47911	4.83362e-05	0.000340372
ENSMUSG00000004359	Spic	12.4965	15.308	336.359	283.315	13.9023	309.837	-4.47965	7.66762e-21	4.10345e-19
ENSMUSG00000094796	BC147527	4.54418	12.953	200.974	188.295	8.74857	194.635	-4.48271	4.10668e-14	1.22761e-12
ENSMUSG00000026875	Traf1	57.9383	57.6996	1534.64	1058.29	57.8189	1296.46	-4.48695	2.54075e-39	5.01558e-37
ENSMUSG00000025912	Mybl1	28.4011	24.7284	951.054	244.958	26.5648	598.006	-4.4923	4.01723e-15	1.34068e-13
ENSMUSG00000066363	Serpina3f	12.4965	5.88771	209.383	207.474	9.19211	208.428	-4.4976	2.01572e-15	6.88074e-14
ENSMUSG00000036587	Fut7	5.68023	8.24279	163.134	152.554	6.96151	157.844	-4.50597	5.09108e-13	1.36229e-11
ENSMUSG00000067599	Klra7	2.27209	3.53263	89.135	44.4586	2.90236	66.7968	-4.52851	2.01066e-06	1.9734e-05
ENSMUSG00000042817	Flt3	18.1767	22.3733	603.764	348.695	20.275	476.229	-4.55523	5.14177e-23	3.31051e-21
ENSMUSG00000042345	Ubash3a	15.9046	14.1305	465.016	249.317	15.0176	357.166	-4.57136	3.32038e-19	1.57906e-17
ENSMUSG00000058470	Gm8369	22.7209	15.308	594.514	312.954	19.0145	453.734	-4.57472	5.846e-21	3.14467e-19
ENSMUSG00000020798	Spns3	15.9046	1.17754	145.475	265.008	8.54109	205.242	-4.57682	1.0645e-10	2.16097e-09
ENSMUSG00000017716	Birc5	9.08836	10.5979	282.541	188.295	9.84312	235.418	-4.58131	1.80685e-16	6.82462e-15
ENSMUSG00000074417	Pira12	2.27209	1.17754	42.0448	40.9717	1.72482	41.5083	-4.58324	7.45459e-05	0.000499
ENSMUSG00000030165	Klrd1	18.1767	3.53263	331.313	194.398	10.8547	262.855	-4.59014	8.78944e-14	2.52636e-12
ENSMUSG00000039981	Zc3h12d	23.857	45.9241	1091.48	600.628	34.8905	846.056	-4.60244	1.08609e-25	8.32473e-24
ENSMUSG00000026285	Pdcd1	5.68023	3.53263	159.77	64.5086	4.60643	112.139	-4.60246	1.14841e-08	1.71768e-07
ENSMUSG00000079597	Cstdc4	3.40814	0	38.6812	45.3304	1.70407	42.0058	-4.60634	0.000115086	0.000730639
ENSMUSG00000050592	Fam78a	54.5302	48.2792	1469.89	1036.5	51.4047	1253.19	-4.60711	1.37784e-40	3.03486e-38
ENSMUSG00000041449	Serpina3h	1.13605	1.17754	27.7496	28.7674	1.15679	28.2585	-4.61077	0.000931759	0.00452578
ENSMUSG00000032661	Oas3	20.4488	11.7754	249.746	545.708	16.1121	397.727	-4.62245	4.55366e-18	1.9446e-16
ENSMUSG00000079339	Ifit1bl1	11.3605	14.1305	323.745	305.108	12.7455	314.427	-4.62634	8.13442e-22	4.78126e-20
ENSMUSG00000021485	Mxd3	1.13605	3.53263	63.9081	51.4325	2.33434	57.6703	-4.63595	4.69353e-06	4.22663e-05
ENSMUSG00000086706	Gm15848	4.54418	2.35508	101.748	71.4825	3.44963	86.6155	-4.64494	3.87638e-08	5.26026e-07
ENSMUSG00000024791	Cdca5	2.27209	7.06525	133.703	99.3781	4.66867	116.54	-4.65031	6.38523e-10	1.15481e-08
ENSMUSG00000026196	Bard1	10.2244	2.35508	217.792	101.993	6.28975	159.893	-4.65965	1.47374e-10	2.92581e-09
ENSMUSG00000104835	Gm5547	5.68023	3.53263	147.998	86.3021	4.60643	117.15	-4.66509	7.64202e-10	1.36792e-08
ENSMUSG00000044103	Il36g	3.40814	2.35508	65.5899	81.9434	2.88161	73.7667	-4.67462	2.23517e-07	2.64992e-06
ENSMUSG00000008601	Rab25	1.13605	4.71017	42.0448	108.096	2.92311	75.0702	-4.69187	1.55522e-06	1.56007e-05
ENSMUSG00000061577	Adgrg5	13.6325	8.24279	325.427	241.471	10.9377	283.449	-4.6922	4.01311e-19	1.89558e-17
ENSMUSG00000062939	Stat4	13.6325	9.42034	422.971	176.091	11.5264	299.531	-4.69774	1.35629e-15	4.69872e-14
ENSMUSG00000000673	Haao	29.5372	11.7754	594.514	485.558	20.6563	540.036	-4.70348	1.54384e-25	1.15374e-23
ENSMUSG00000024056	Ndc80	3.40814	9.42034	231.247	103.737	6.41424	167.492	-4.71365	3.30432e-11	7.15765e-10
ENSMUSG00000057135	Scimp	1.13605	8.24279	142.111	101.993	4.68942	122.052	-4.71415	1.0336e-09	1.81901e-08
ENSMUSG00000034317	Trim59	32.9453	25.9059	1105.78	448.073	29.4256	776.926	-4.72183	6.33501e-23	4.04147e-21
ENSMUSG00000112907	Gm47015	4.54418	3.53263	150.52	63.6369	4.0384	107.079	-4.7272	1.14218e-08	1.71082e-07
ENSMUSG00000036768	Kif15	7.95232	16.4856	428.857	218.806	12.219	323.832	-4.73265	2.40141e-17	9.79521e-16
ENSMUSG00000000157	Itgb2l	9.08836	0	91.6577	150.811	4.54418	121.234	-4.7341	0.0132993	0.0430386
ENSMUSG00000107715	Gm44135	1.13605	0	16.8179	13.9478	0.568023	15.3829	-4.73672	0.014331	0.0456215
ENSMUSG00000030091	Nup210	95.4278	131.885	3518.31	2600.39	113.656	3059.35	-4.75131	9.72289e-52	5.49869e-49
ENSMUSG00000015437	Gzmb	5.68023	2.35508	100.908	116.813	4.01766	108.86	-4.75271	8.16232e-10	1.45483e-08
ENSMUSG00000055717	Slain1	6.81627	15.308	349.813	245.83	11.0622	297.822	-4.75641	7.846e-19	3.59251e-17
ENSMUSG00000040247	Tbc1d10c	23.857	11.7754	588.627	379.206	17.8162	483.917	-4.75955	8.0385e-24	5.51493e-22
ENSMUSG00000076555	Igkv4-57-1	4.54418	3.53263	110.157	110.711	4.0384	110.434	-4.77103	3.64091e-10	6.87599e-09
ENSMUSG00000057058	Skap1	23.857	18.8407	742.512	432.382	21.3488	587.447	-4.78103	1.04482e-26	8.47401e-25
ENSMUSG00000028873	Cdca8	13.6325	7.06525	354.017	218.806	10.3489	286.412	-4.7862	5.39165e-18	2.28381e-16
ENSMUSG00000026955	Sapcd2	1.13605	4.71017	92.4986	67.9956	2.92311	80.2471	-4.78982	1.2901e-07	1.59831e-06
ENSMUSG00000039521	Foxp3	7.95232	5.88771	237.974	146.452	6.92001	192.213	-4.79367	2.83942e-14	8.66106e-13
ENSMUSG00000054065	Pkp3	15.9046	15.308	401.108	468.995	15.6063	435.051	-4.80063	2.06829e-27	1.76649e-25
ENSMUSG00000068129	Cst7	12.4965	7.06525	314.495	237.113	9.78088	275.804	-4.81339	4.84746e-19	2.2692e-17
ENSMUSG00000027715	Ccna2	20.4488	17.6631	724.853	352.182	19.056	538.517	-4.82004	3.27209e-23	2.15989e-21
ENSMUSG00000098322	5830468F06Rik	0	2.35508	37.8403	27.8956	1.17754	32.868	-4.82146	0.000505425	0.00266734
ENSMUSG00000029602	Rasal1	15.9046	4.71017	289.268	306.852	10.3074	298.06	-4.84585	4.57603e-19	2.14694e-17
ENSMUSG00000044678	Ly6k	0	1.17754	16.8179	16.563	0.588771	16.6905	-4.84715	0.0107882	0.036142
ENSMUSG00000042489	Clspn	4.54418	11.7754	307.768	162.143	8.1598	234.956	-4.8543	8.98496e-15	2.89247e-13
ENSMUSG00000025001	Hells	23.857	11.7754	760.17	276.341	17.8162	518.256	-4.85944	3.1249e-18	1.3538e-16
ENSMUSG00000050075	Gpr171	7.95232	15.308	453.243	224.037	11.6302	338.64	-4.86811	4.31178e-18	1.84507e-16
ENSMUSG00000026180	Cxcr2	27.2651	10.5979	586.946	529.145	18.9315	558.045	-4.87607	1.39815e-27	1.20396e-25
ENSMUSG00000058728	Cd300c	2.27209	0	34.4768	33.126	1.13605	33.8014	-4.87654	0.000391456	0.00213703
ENSMUSG00000028071	Sh2d2a	21.5849	20.0182	725.694	505.608	20.8015	615.651	-4.88698	2.50864e-31	2.86848e-29
ENSMUSG00000059657	Stfa2l1	2.27209	0	43.7266	24.4087	1.13605	34.0676	-4.88854	0.000448818	0.00240685
ENSMUSG00000062007	Hsh2d	3.40814	10.5979	200.974	212.704	7.00301	206.839	-4.8928	1.6339e-15	5.60483e-14
ENSMUSG00000093955	Ighv1-34	3.40814	2.35508	88.2941	83.6869	2.88161	85.9905	-4.8959	2.13128e-08	3.04209e-07
ENSMUSG00000027469	Tpx2	11.3605	17.6631	573.491	290.289	14.5118	431.89	-4.89823	2.88742e-21	1.58998e-19
ENSMUSG00000056145	AI504432	29.5372	25.9059	1155.39	499.506	27.7216	827.449	-4.89915	7.9632e-26	6.14871e-24
ENSMUSG00000037280	Galnt6	29.5372	15.308	784.556	557.041	22.4226	670.799	-4.89923	3.63568e-30	3.7849e-28
ENSMUSG00000076668	Ighv7-4	1.13605	0	8.40896	26.1521	0.568023	17.2806	-4.90362	0.0114234	0.0378998
ENSMUSG00000042195	Slc35f2	1.13605	2.35508	59.7036	44.4586	1.74556	52.0811	-4.90576	1.07003e-05	8.84643e-05
ENSMUSG00000037922	Bank1	86.3395	57.6996	2888.48	1439.24	72.0195	2163.86	-4.90814	4.45771e-35	6.38888e-33
ENSMUSG00000027315	Spint1	6.81627	4.71017	84.0896	264.137	5.76322	174.113	-4.91408	7.29091e-11	1.51502e-09
ENSMUSG00000027347	Rasgrp1	53.3941	48.2792	2029.92	1036.5	50.8367	1533.21	-4.91427	1.53291e-35	2.34132e-33
ENSMUSG00000044313	Mab21l3	4.54418	0	79.8852	59.2782	2.27209	69.5817	-4.91929	1.20418e-06	1.23517e-05
ENSMUSG00000072601	Ear1	2.27209	2.35508	64.749	75.8412	2.31359	70.2951	-4.92543	3.38558e-07	3.88416e-06
ENSMUSG00000057606	Colq	2.27209	18.8407	364.108	273.726	10.5564	318.917	-4.92689	3.33404e-16	1.22609e-14
ENSMUSG00000070691	Runx3	23.857	22.3733	729.057	692.16	23.1151	710.609	-4.94172	2.08476e-38	3.86049e-36
ENSMUSG00000041857	Oosp1	2.27209	1.17754	58.0219	48.8173	1.72482	53.4196	-4.947	7.68838e-06	6.57456e-05
ENSMUSG00000037544	Dlgap5	6.81627	8.24279	323.745	140.35	7.52953	232.047	-4.94738	1.92437e-14	5.98327e-13
ENSMUSG00000019876	Pkib	5.68023	12.953	360.745	212.704	9.3166	286.724	-4.94964	9.20876e-18	3.83851e-16
ENSMUSG00000022586	Ly6i	1.13605	3.53263	56.3401	87.1738	2.33434	71.7569	-4.95112	4.79196e-07	5.35926e-06
ENSMUSG00000020897	Aurkb	2.27209	14.1305	322.063	182.193	8.2013	252.128	-4.95217	2.23751e-14	6.88527e-13
ENSMUSG00000035448	Ccr3	2.27209	4.71017	100.908	115.069	3.49113	107.989	-4.95733	6.69987e-10	1.20754e-08
ENSMUSG00000003882	Il7r	54.5302	44.7466	2141.76	957.168	49.6384	1549.47	-4.96363	6.51698e-32	7.7044e-30
ENSMUSG00000062585	Cnr2	30.6732	34.1487	1293.3	747.08	32.411	1020.19	-4.97683	3.31246e-35	4.88122e-33
ENSMUSG00000086652	Gm14029	0	2.35508	43.7266	29.6391	1.17754	36.6829	-4.98038	0.000251255	0.00143923
ENSMUSG00000095519	Ighv1-66	3.40814	4.71017	121.93	134.248	4.05915	128.089	-4.98268	2.0423e-11	4.55599e-10
ENSMUSG00000030867	Plk1	9.08836	4.71017	264.882	173.476	6.89927	219.179	-4.98457	7.30669e-16	2.60464e-14
ENSMUSG00000022439	Parvg	36.3535	36.5038	1430.36	877.84	36.4286	1154.1	-4.98566	7.1138e-39	1.35324e-36
ENSMUSG00000070000	Fcho1	26.129	31.7936	1038.51	798.512	28.9613	918.51	-4.98833	8.45872e-41	1.90321e-38
ENSMUSG00000079563	Pglyrp2	18.1767	10.5979	584.423	335.619	14.3873	460.021	-4.99555	1.33265e-23	9.05379e-22
ENSMUSG00000030178	Klra13-ps	4.54418	4.71017	203.497	93.276	4.62718	148.386	-5.00374	3.32945e-11	7.19719e-10
ENSMUSG00000072109	A530040E14Rik	6.81627	9.42034	295.996	224.908	8.11831	260.452	-5.00651	5.96344e-19	2.77918e-17
ENSMUSG00000028718	Stil	7.95232	1.17754	203.497	93.276	4.56493	148.386	-5.01156	2.22276e-10	4.3347e-09
ENSMUSG00000022534	Mefv	6.81627	3.53263	179.952	156.913	5.17445	168.432	-5.01908	6.63426e-14	1.93615e-12
ENSMUSG00000022659	Gcsam	12.4965	11.7754	631.513	158.656	12.136	395.085	-5.02472	6.36835e-15	2.08541e-13
ENSMUSG00000035459	Stab2	27.2651	11.7754	681.967	601.499	19.5203	641.733	-5.03386	2.27392e-31	2.61438e-29
ENSMUSG00000012443	Kif11	20.4488	23.5508	1002.35	441.971	21.9998	722.16	-5.0376	1.05372e-25	8.10627e-24
ENSMUSG00000027220	Syt13	1.13605	7.06525	158.929	108.967	4.10065	133.948	-5.04233	8.80734e-11	1.80857e-09
ENSMUSG00000085603	Gm11346	7.95232	5.88771	292.632	165.63	6.92001	229.131	-5.04711	6.32068e-16	2.26473e-14
ENSMUSG00000037849	Ifi206	18.1767	28.261	787.92	756.669	23.2189	772.294	-5.0587	6.10214e-39	1.17144e-36
ENSMUSG00000060621	Nkpd1	1.13605	2.35508	49.6129	66.2521	1.74556	57.9325	-5.05908	3.75343e-06	3.45841e-05
ENSMUSG00000030156	Cd69	14.7686	10.5979	596.196	251.061	12.6832	423.628	-5.06	8.71972e-20	4.30331e-18
ENSMUSG00000006398	Cdc20	9.08836	8.24279	341.404	237.113	8.66558	289.258	-5.06029	4.70139e-20	2.37052e-18
ENSMUSG00000052142	Rasal3	55.6662	57.6996	2156.9	1636.25	56.6829	1896.58	-5.06454	7.24094e-56	5.05055e-53
ENSMUSG00000017639	Rab11fip4	11.3605	16.4856	501.174	430.639	13.923	465.906	-5.0674	6.73784e-29	6.4674e-27
ENSMUSG00000078780	Gm5150	1.13605	1.17754	23.5451	54.0478	1.15679	38.7964	-5.06747	0.000178652	0.00107207
ENSMUSG00000025279	Dnase1l3	27.2651	45.9241	1475.77	1012.09	36.5946	1243.93	-5.08962	2.65783e-40	5.67501e-38
ENSMUSG00000015619	Gata3	14.7686	10.5979	341.404	524.786	12.6832	433.095	-5.09113	4.04227e-25	2.9575e-23
ENSMUSG00000095633	Igkv4-58	4.54418	0	95.8622	61.0217	2.27209	78.4419	-5.09197	3.44557e-07	3.94412e-06
ENSMUSG00000026622	Nek2	2.27209	9.42034	256.473	140.35	5.84621	198.412	-5.09475	1.83256e-13	5.11285e-12
ENSMUSG00000027326	Knl1	7.95232	14.1305	564.241	190.039	11.0414	377.14	-5.09758	1.38195e-16	5.2769e-15
ENSMUSG00000037913	Tmem156	6.81627	4.71017	260.678	135.119	5.76322	197.899	-5.09906	4.58083e-14	1.35963e-12
ENSMUSG00000064246	Chil1	21.5849	5.88771	104.271	840.356	13.7363	472.313	-5.1025	0.000580211	0.00300592
ENSMUSG00000031428	Zcchc18	6.81627	3.53263	211.065	147.324	5.17445	179.194	-5.10862	4.15912e-14	1.2415e-12
ENSMUSG00000086245	Gm16170	1.13605	8.24279	194.247	133.376	4.68942	163.812	-5.13953	2.62912e-12	6.54153e-11
ENSMUSG00000037725	Ckap2	1.13605	5.88771	171.543	74.9695	3.51188	123.256	-5.14494	2.02541e-09	3.40415e-08
ENSMUSG00000029414	Kntc1	7.95232	3.53263	253.951	154.298	5.74247	204.124	-5.14542	7.88132e-15	2.55927e-13
ENSMUSG00000100150	Gm19585	0	5.88771	144.634	61.8934	2.94386	103.264	-5.14933	5.7299e-08	7.58849e-07
ENSMUSG00000026117	Zap70	14.7686	24.7284	777.829	620.678	19.7485	699.253	-5.1495	3.05539e-35	4.53433e-33
ENSMUSG00000002055	Spag5	9.08836	2.35508	250.587	159.528	5.72172	205.058	-5.15394	1.47912e-14	4.67532e-13
ENSMUSG00000038352	Arl5c	7.95232	15.308	473.425	354.797	11.6302	414.111	-5.15906	3.04179e-25	2.2491e-23
ENSMUSG00000063903	Klk1	0	2.35508	54.6583	28.7674	1.17754	41.7128	-5.1662	0.00012108	0.0007629
ENSMUSG00000050357	Carmil2	32.9453	10.5979	934.236	636.369	21.7716	785.302	-5.16742	1.75396e-28	1.63846e-26
ENSMUSG00000020732	Rab37	7.95232	5.88771	291.791	208.345	6.92001	250.068	-5.17301	2.84572e-18	1.24315e-16
ENSMUSG00000049871	Nlrc3	15.9046	23.5508	842.578	584.065	19.7277	713.321	-5.1789	3.69801e-34	4.99232e-32
ENSMUSG00000020396	Nefh	2.27209	4.71017	169.02	83.6869	3.49113	126.354	-5.18413	3.34633e-10	6.34878e-09
ENSMUSG00000001228	Uhrf1	6.81627	29.4386	761.852	551.81	18.1274	656.831	-5.18612	6.49693e-25	4.70409e-23
ENSMUSG00000040204	Pclaf	19.3128	23.5508	1083.07	476.841	21.4318	779.958	-5.18671	3.87481e-27	3.25624e-25
ENSMUSG00000048327	Ckap2l	5.68023	7.06525	310.291	156.913	6.37274	233.602	-5.19802	1.12977e-15	3.95987e-14
ENSMUSG00000030200	Bcl2l14	1.13605	3.53263	91.6577	79.3282	2.33434	85.4929	-5.20474	3.25655e-08	4.47135e-07
ENSMUSG00000099757	BE692007	43.1697	32.9712	1932.38	883.071	38.0705	1407.73	-5.20762	1.54421e-33	1.95833e-31
ENSMUSG00000020395	Itk	21.5849	40.0364	1398.41	877.84	30.8106	1138.13	-5.21009	7.74171e-37	1.28568e-34
ENSMUSG00000071552	Tigit	6.81627	0	179.952	73.226	3.40814	126.589	-5.21022	0.00480939	0.0183912
ENSMUSG00000086564	Cd101	2.27209	3.53263	105.112	109.839	2.90236	107.476	-5.21479	6.10614e-10	1.10722e-08
ENSMUSG00000109684	Gm45745	1.13605	1.17754	65.5899	20.9217	1.15679	43.2558	-5.22569	0.000118825	0.000750955
ENSMUSG00000031995	St14	7.95232	23.5508	307.768	867.379	15.7516	587.574	-5.22578	3.75816e-19	1.77917e-17
ENSMUSG00000043740	B430306N03Rik	7.95232	5.88771	239.655	280.7	6.92001	260.178	-5.22984	1.60215e-19	7.77843e-18
ENSMUSG00000085651	Gm11695	1.13605	0	26.9087	16.563	0.568023	21.7359	-5.23517	0.00411404	0.0161452
ENSMUSG00000028613	Lrp8	10.2244	3.53263	293.473	233.626	6.87852	263.549	-5.25163	1.25488e-18	5.65914e-17
ENSMUSG00000079033	Mef2b	6.81627	3.53263	232.087	164.759	5.17445	198.423	-5.25554	2.7324e-15	9.25168e-14
ENSMUSG00000030167	Klrc1	2.27209	3.53263	128.657	93.276	2.90236	110.967	-5.26112	5.5223e-10	1.01631e-08
ENSMUSG00000054892	Txk	9.08836	7.06525	368.313	254.548	8.07681	311.43	-5.26703	3.53536e-21	1.92649e-19
ENSMUSG00000032093	Cd3e	19.3128	22.3733	1029.26	577.962	20.843	803.61	-5.26985	6.16304e-33	7.63086e-31
ENSMUSG00000079794	-	0	1.17754	37.8403	6.97391	0.588771	22.4071	-5.27291	0.00559313	0.020933
ENSMUSG00000030346	Rad51ap1	2.27209	3.53263	147.157	76.713	2.90236	111.935	-5.27365	1.55748e-09	2.67793e-08
ENSMUSG00000096225	Lhx8	2.27209	0	37.8403	51.4325	1.13605	44.6364	-5.27633	5.78575e-05	0.000400485
ENSMUSG00000035683	Melk	4.54418	2.35508	177.429	91.5325	3.44963	134.481	-5.27947	8.67693e-11	1.78354e-09
ENSMUSG00000100880	Gm6610	0	1.17754	29.4314	15.6913	0.588771	22.5613	-5.28313	0.00368574	0.0146987
ENSMUSG00000100392	Gm28935	1.13605	0	30.2723	14.8195	0.568023	22.5459	-5.28812	0.00376221	0.0149609
ENSMUSG00000022033	Pbk	2.27209	3.53263	147.998	78.4564	2.90236	113.227	-5.29022	1.21502e-09	2.11959e-08
ENSMUSG00000028459	Cd72	14.7686	30.6161	1042.71	736.619	22.6923	889.665	-5.29722	6.0175e-36	9.61192e-34
ENSMUSG00000108132	Gm44175	4.54418	2.35508	175.747	96.7629	3.44963	136.255	-5.29829	4.78135e-11	1.01884e-09
ENSMUSG00000045328	Cenpe	11.3605	11.7754	621.422	291.161	11.5679	456.291	-5.30219	1.20167e-22	7.48359e-21
ENSMUSG00000060969	Irx1	18.1767	2.35508	65.5899	747.08	10.2659	406.335	-5.30528	0.00297161	0.0122139
ENSMUSG00000054702	Ap1s3	6.81627	15.308	607.968	272.854	11.0622	440.411	-5.32035	1.06432e-20	5.63819e-19
ENSMUSG00000085887	Arhgap27os3	10.2244	5.88771	409.517	237.985	8.05606	323.751	-5.32456	3.50561e-20	1.78914e-18
ENSMUSG00000001588	Acap1	47.7139	36.5038	2025.72	1366.01	42.1089	1695.87	-5.33055	4.00436e-50	1.99503e-47
ENSMUSG00000002033	Cd3g	18.1767	18.8407	893.873	595.397	18.5087	744.635	-5.33061	9.13505e-36	1.43722e-33
ENSMUSG00000030792	Dkkl1	3.40814	0	58.0219	81.9434	1.70407	69.9826	-5.3405	8.91147e-07	9.37047e-06
ENSMUSG00000076470	Trbv13-3	1.13605	0	30.2723	16.563	0.568023	23.4176	-5.34268	0.00312926	0.0127532
ENSMUSG00000053338	Tarm1	1.13605	1.17754	37.8403	56.663	1.15679	47.2517	-5.3522	3.10209e-05	0.000228964
ENSMUSG00000037318	Traf3ip3	17.0407	35.3263	1346.28	811.588	26.1835	1078.93	-5.36847	2.20152e-35	3.33818e-33
ENSMUSG00000102037	Bcl2a1a	1.13605	2.35508	94.1804	49.6891	1.74556	71.9347	-5.37213	6.48484e-07	7.03814e-06
ENSMUSG00000024989	Cep55	6.81627	3.53263	301.882	129.017	5.17445	215.45	-5.37496	5.40754e-14	1.59146e-12
ENSMUSG00000034311	Kif4	6.81627	2.35508	253.951	129.017	4.58568	191.484	-5.37592	1.75105e-13	4.89849e-12
ENSMUSG00000026683	Nuf2	5.68023	3.53263	248.905	138.606	4.60643	193.756	-5.39059	2.98796e-14	9.06131e-13
ENSMUSG00000028435	Aqp3	1.13605	2.35508	86.6123	60.1499	1.74556	73.3811	-5.40087	3.30989e-07	3.80755e-06
ENSMUSG00000004552	Ctse	13.6325	2.35508	396.903	284.187	7.99382	340.545	-5.40195	5.42905e-20	2.73084e-18
ENSMUSG00000076533	Igkv4-90	0	1.17754	32.795	16.563	0.588771	24.679	-5.41278	0.00259359	0.0108934
ENSMUSG00000026832	Cytip	81.7953	37.6813	3117.2	1981.46	59.7383	2549.33	-5.41317	1.36055e-42	3.69734e-40
ENSMUSG00000087538	Gm16341	0	2.35508	79.0443	20.9217	1.17754	49.983	-5.42685	7.41879e-05	0.00049708
ENSMUSG00000000627	Sema4f	3.40814	4.71017	215.269	134.248	4.05915	174.759	-5.43127	1.19379e-13	3.39402e-12
ENSMUSG00000045545	Krt14	3.40814	7.06525	116.044	334.747	5.23669	225.396	-5.43274	2.17446e-13	6.01861e-12
ENSMUSG00000064065	Ipcef1	18.1767	15.308	949.372	498.634	16.7424	724.003	-5.43346	1.01561e-30	1.10685e-28
ENSMUSG00000032094	Cd3d	13.6325	15.308	768.579	482.943	14.4703	625.761	-5.43541	9.02228e-32	1.0547e-29
ENSMUSG00000111839	Gm39383	0	1.17754	28.5905	21.7935	0.588771	25.192	-5.44236	0.00216178	0.0093134
ENSMUSG00000076463	Trbv3	1.13605	1.17754	59.7036	40.9717	1.15679	50.3377	-5.44408	1.86584e-05	0.000145899
ENSMUSG00000076469	Trbv13-2	2.27209	1.17754	100.067	53.176	1.72482	76.6213	-5.4674	3.23325e-07	3.72554e-06
ENSMUSG00000029254	Stap1	22.7209	16.4856	1234.44	509.095	19.6033	871.766	-5.47325	2.87489e-28	2.63847e-26
ENSMUSG00000034833	Tespa1	10.2244	5.88771	456.607	264.137	8.05606	360.372	-5.47909	1.05556e-21	6.13544e-20
ENSMUSG00000020649	Rrm2	18.1767	8.24279	718.126	468.123	13.2098	593.124	-5.48335	1.47454e-29	1.46166e-27
ENSMUSG00000062545	Tlr12	4.54418	2.35508	170.702	141.222	3.44963	155.962	-5.49254	5.40422e-13	1.43872e-11
ENSMUSG00000037625	Cldn11	1.13605	1.17754	58.8627	45.3304	1.15679	52.0966	-5.49355	1.32752e-05	0.000107543
ENSMUSG00000044770	Scml4	3.40814	22.3733	665.99	506.48	12.8907	586.235	-5.51653	1.1136e-24	7.9259e-23
ENSMUSG00000028555	Ttc39a	1.13605	4.71017	135.384	130.761	2.92311	133.073	-5.52069	2.28948e-11	5.05885e-10
ENSMUSG00000019982	Myb	7.95232	9.42034	533.128	264.137	8.68633	398.632	-5.52168	6.02229e-22	3.56987e-20
ENSMUSG00000106494	Igkv2-107	0	0	13.4543	6.10217	0	9.77825	-5.52289	0.0151782	0.0477457
ENSMUSG00000026605	Cenpf	7.95232	9.42034	523.878	274.598	8.68633	399.238	-5.52388	1.5624e-22	9.58746e-21
ENSMUSG00000014453	Blk	31.8093	10.5979	1163.8	799.384	21.2036	981.592	-5.52722	4.16807e-34	5.55522e-32
ENSMUSG00000076562	Igkv4-50	3.40814	0	91.6577	68.8673	1.70407	80.2625	-5.53806	1.74467e-07	2.10902e-06
ENSMUSG00000076575	Igkv7-33	0	0	5.88627	13.9478	0	9.91704	-5.54207	0.0146135	0.0463033
ENSMUSG00000030468	Siglecg	30.6732	23.5508	1628.82	901.377	27.112	1265.1	-5.54286	1.91006e-40	4.12042e-38
ENSMUSG00000043003	Rasef	1.13605	4.71017	137.907	132.504	2.92311	135.206	-5.54366	1.70826e-11	3.86854e-10
ENSMUSG00000096719	Mrgpra2b	0	1.17754	20.1815	33.9978	0.588771	27.0897	-5.5466	0.0016657	0.007446
ENSMUSG00000026012	Cd28	20.4488	17.6631	1250.41	533.504	19.056	891.958	-5.54799	7.4099e-30	7.45443e-28
ENSMUSG00000103939	Ighv3-4	2.27209	0	96.7031	11.3326	1.13605	54.0178	-5.55476	0.00012683	0.000796014
ENSMUSG00000048031	Fcrl5	2.27209	3.53263	150.52	123.787	2.90236	137.154	-5.56689	9.8386e-12	2.30025e-10
ENSMUSG00000098291	Mir6973a	0	0	11.7725	8.71738	0	10.245	-5.58983	0.0119626	0.0393456
ENSMUSG00000036526	Card11	24.993	22.3733	1287.41	1014.7	23.6832	1151.06	-5.60225	2.43403e-50	1.30595e-47
ENSMUSG00000046179	E2f8	0	8.24279	251.428	148.195	4.1214	199.812	-5.60335	0.00282439	0.0117216
ENSMUSG00000043168	4930426D05Rik	2.27209	1.17754	115.203	56.663	1.72482	85.9329	-5.63282	1.09673e-07	1.38081e-06
ENSMUSG00000076755	Trgv1	0	0	14.2952	6.97391	0	10.6346	-5.64396	0.010924	0.0364977
ENSMUSG00000030742	Lat	20.4488	18.8407	1267.23	698.262	19.6447	982.747	-5.6442	1.90589e-37	3.24233e-35
ENSMUSG00000042351	Grap2	32.9453	41.214	2180.44	1529.03	37.0796	1854.74	-5.64568	5.37688e-57	4.50045e-54
ENSMUSG00000025014	Dntt	0	3.53263	93.3395	81.0716	1.76631	87.2056	-5.64617	5.439e-08	7.21694e-07
ENSMUSG00000024401	Tnf	3.40814	0	88.2941	85.4303	1.70407	86.8622	-5.65146	5.63091e-08	7.46684e-07
ENSMUSG00000048251	Bcl11b	20.4488	20.0182	1242	792.41	20.2335	1017.21	-5.65167	4.7889e-42	1.26845e-39
ENSMUSG00000022686	B3gnt5	20.4488	18.8407	1332.82	660.778	19.6447	996.799	-5.66471	3.79527e-35	5.51501e-33
ENSMUSG00000014686	Ceacam16	0	1.17754	30.2723	28.7674	0.588771	29.5198	-5.67128	0.00104939	0.00501563
ENSMUSG00000015316	Slamf1	6.81627	4.71017	417.085	182.193	5.76322	299.639	-5.69743	1.32925e-17	5.50785e-16
ENSMUSG00000053541	Gvin-ps6	10.2244	18.8407	1002.35	502.121	14.5325	752.235	-5.69779	4.16778e-30	4.31736e-28
ENSMUSG00000112230	Ifngas1	1.13605	1.17754	73.9989	46.2021	1.15679	60.1005	-5.69988	4.82919e-06	4.33694e-05
ENSMUSG00000056290	Ms4a4b	47.7139	37.6813	2966.68	1500.26	42.6976	2233.47	-5.70813	3.28064e-46	1.27125e-43
ENSMUSG00000091491	Vmn2r97	11.3605	9.42034	788.761	309.467	10.3904	549.114	-5.72269	1.54143e-23	1.04047e-21
ENSMUSG00000017146	Brca1	6.81627	1.17754	274.132	155.169	3.99691	214.651	-5.73436	1.10513e-14	3.53053e-13
ENSMUSG00000076489	Trbj1-7	0	0	17.6588	5.23043	0	11.4446	-5.75012	0.00921195	0.0316052
ENSMUSG00000100744	Gm17764	0	0	15.977	6.97391	0	11.4755	-5.75382	0.00826611	0.0288665
ENSMUSG00000095836	Gm21960	0	0	15.977	6.97391	0	11.4755	-5.75382	0.00826611	0.0288665
ENSMUSG00000047959	Kcna3	7.95232	2.35508	315.336	247.574	5.1537	281.455	-5.76105	1.71437e-19	8.30399e-18
ENSMUSG00000018168	Ikzf3	64.7546	42.3915	3680.6	2197.65	53.5731	2939.13	-5.77625	5.3958e-55	3.64216e-52
ENSMUSG00000035498	Cdcp1	2.27209	4.71017	134.543	248.445	3.49113	191.494	-5.78385	8.09275e-14	2.33574e-12
ENSMUSG00000030283	St8sia1	7.95232	3.53263	412.039	224.037	5.74247	318.038	-5.78487	1.74375e-19	8.42679e-18
ENSMUSG00000026866	Kynu	6.81627	1.17754	294.314	153.426	3.99691	223.87	-5.79517	9.26981e-15	2.97958e-13
ENSMUSG00000038128	Camk4	4.54418	1.17754	207.701	113.326	2.86086	160.514	-5.79904	4.82516e-12	1.16455e-10
ENSMUSG00000029603	Dtx1	11.3605	22.3733	989.735	890.045	16.8669	939.89	-5.80524	1.75524e-44	5.40123e-42
ENSMUSG00000100170	Gm28942	0	0	14.2952	9.58912	0	11.9422	-5.81106	0.00649511	0.0237273
ENSMUSG00000034607	Pof1b	2.27209	0	59.7036	70.6108	1.13605	65.1572	-5.82071	2.43001e-06	2.32927e-05
ENSMUSG00000000903	Vpreb3	0	8.24279	315.336	150.811	4.1214	233.073	-5.82529	0.00256142	0.0107842
ENSMUSG00000016498	Pdcd1lg2	2.27209	1.17754	116.044	81.9434	1.72482	98.9935	-5.83643	9.4672e-09	1.43656e-07
ENSMUSG00000050600	Zfp831	18.1767	8.24279	933.395	590.167	13.2098	761.781	-5.84427	3.1685e-34	4.33339e-32
ENSMUSG00000030651	Art2b	9.08836	0	383.449	140.35	4.54418	261.899	-5.84578	0.00430923	0.0167916
ENSMUSG00000026011	Ctla4	5.68023	3.53263	350.654	183.065	4.60643	266.859	-5.85227	2.74922e-17	1.11272e-15
ENSMUSG00000023274	Cd4	23.857	30.6161	1761.68	1382.58	27.2365	1572.13	-5.8527	7.6907e-59	7.66323e-56
ENSMUSG00000076688	Ighv15-2	0	0	15.1361	9.58912	0	12.3626	-5.86101	0.00564729	0.0211037
ENSMUSG00000074071	Fam169b	10.2244	7.06525	623.104	391.41	8.64483	507.257	-5.87176	3.03924e-28	2.76505e-26
ENSMUSG00000109713	Pvrig	1.13605	0	28.5905	39.2282	0.568023	33.9093	-5.87548	0.000566614	0.00294638
ENSMUSG00000026390	Marco	22.7209	21.1958	939.281	1644.1	21.9583	1291.69	-5.87784	2.49159e-44	7.55601e-42
ENSMUSG00000051998	Lax1	20.4488	20.0182	1472.41	907.479	20.2335	1189.94	-5.87794	3.93745e-45	1.24835e-42
ENSMUSG00000086481	Gm11707	0	1.17754	42.8857	25.2804	0.588771	34.0831	-5.87917	0.00058954	0.00304596
ENSMUSG00000070501	Ifi214	3.40814	3.53263	219.474	189.167	3.47038	204.321	-5.88005	9.76804e-16	3.43523e-14
ENSMUSG00000000792	Slc5a5	0	4.71017	182.475	91.5325	2.35508	137.004	-5.88205	3.25313e-10	6.19398e-09
ENSMUSG00000031004	Mki67	77.2511	48.2792	5089.11	2321.44	62.7652	3705.27	-5.8823	8.56266e-46	3.03684e-43
ENSMUSG00000052271	Bhlha15	1.13605	4.71017	193.406	149.939	2.92311	171.673	-5.88862	2.58137e-13	7.09791e-12
ENSMUSG00000087362	Gm13710	1.13605	0	51.2947	18.3065	0.568023	34.8006	-5.914	0.00067157	0.00340092
ENSMUSG00000113138	Gm47177	0	0	10.9317	14.8195	0	12.8756	-5.9191	0.00463946	0.0178457
ENSMUSG00000029204	Rhoh	13.6325	20.0182	1337.03	701.749	16.8254	1019.39	-5.92347	3.41284e-37	5.75917e-35
ENSMUSG00000000409	Lck	42.0337	15.308	2029.92	1482.83	28.6709	1756.38	-5.93223	7.63351e-46	2.75398e-43
ENSMUSG00000116504	I730030J21Rik	1.13605	1.17754	83.2487	58.4065	1.15679	70.8276	-5.93674	1.06057e-06	1.09972e-05
ENSMUSG00000032572	Col6a4	1.13605	5.88771	216.11	211.832	3.51188	213.971	-5.9428	7.35141e-16	2.61613e-14
ENSMUSG00000027985	Lef1	7.95232	16.4856	922.463	577.091	12.219	749.777	-5.94472	2.46335e-34	3.39116e-32
ENSMUSG00000076676	Ighv12-3	0	0	20.1815	6.10217	0	13.1418	-5.9496	0.00523207	0.0197847
ENSMUSG00000050921	P2ry10	21.5849	12.953	1514.45	639.856	17.2689	1077.16	-5.96018	9.69007e-33	1.18576e-30
ENSMUSG00000076467	Trbv13-1	1.13605	0	52.1356	20.05	0.568023	36.0928	-5.96649	0.000545934	0.00285592
ENSMUSG00000022657	Cd96	7.95232	4.71017	543.219	251.932	6.33124	397.576	-5.9685	2.52061e-21	1.40276e-19
ENSMUSG00000048215	A630023P12Rik	3.40814	1.17754	203.497	86.3021	2.29284	144.9	-5.97267	1.41611e-10	2.81407e-09
ENSMUSG00000024353	Mzb1	1.13605	3.53263	182.475	110.711	2.33434	146.593	-5.98346	2.27824e-11	5.03935e-10
ENSMUSG00000104417	Gm37068	0	0	14.2952	13.0761	0	13.6857	-6.00742	0.00346585	0.0139306
ENSMUSG00000024669	Cd5	12.4965	8.24279	840.056	533.504	10.3696	686.78	-6.04613	4.89133e-34	6.47792e-32
ENSMUSG00000091705	H2-Q2	2.27209	0	87.4532	66.2521	1.13605	76.8527	-6.05876	5.85499e-07	6.43119e-06
ENSMUSG00000025163	Cd7	3.40814	4.71017	301.882	240.6	4.05915	271.241	-6.06563	4.48508e-19	2.10899e-17
ENSMUSG00000113035	5830428M24Rik	2.27209	4.71017	308.609	156.913	3.49113	232.761	-6.06603	2.38891e-15	8.1281e-14
ENSMUSG00000027368	Dusp2	10.2244	12.953	874.532	699.134	11.5887	786.833	-6.08739	4.8548e-41	1.12874e-38
ENSMUSG00000071716	Apol7e	1.13605	3.53263	181.634	135.991	2.33434	158.812	-6.09919	2.8412e-12	7.05244e-11
ENSMUSG00000044217	Aqp5	1.13605	4.71017	96.7031	301.621	2.92311	199.162	-6.10105	4.66446e-12	1.12967e-10
ENSMUSG00000033952	Aspm	6.81627	3.53263	484.356	237.113	5.17445	360.735	-6.11791	2.3962e-20	1.24418e-18
ENSMUSG00000076580	Igkv8-27	4.54418	4.71017	374.199	271.982	4.62718	323.091	-6.12616	2.3303e-21	1.30728e-19
ENSMUSG00000021125	Arg2	2.27209	0	100.908	60.1499	1.13605	80.5288	-6.12643	4.97275e-07	5.53189e-06
ENSMUSG00000070473	Cldn3	4.54418	2.35508	87.4532	407.973	3.44963	247.713	-6.16063	1.63536e-12	4.14284e-11
ENSMUSG00000032556	Bfsp2	2.27209	0	113.521	51.4325	1.13605	82.4768	-6.16137	6.25193e-07	6.80299e-06
ENSMUSG00000076543	Igkv4-74	2.27209	4.71017	137.066	362.643	3.49113	249.855	-6.16738	9.81416e-15	3.14008e-13
ENSMUSG00000096767	Ighv1-62-3	0	0	15.1361	15.6913	0	15.4137	-6.17888	0.00196831	0.00858239
ENSMUSG00000115681	Gm2682	9.08836	3.53263	655.899	277.213	6.3105	466.556	-6.20114	4.1786e-22	2.49821e-20
ENSMUSG00000105231	Iglj3	0	0	22.7042	8.71738	0	15.7108	-6.20708	0.00217562	0.00936531
ENSMUSG00000032218	Ccnb2	4.54418	3.53263	364.108	238.856	4.0384	301.482	-6.21981	1.37377e-19	6.71639e-18
ENSMUSG00000102364	Ighv8-5	0	0	10.0908	21.7935	0	15.9421	-6.227	0.00190592	0.00835385
ENSMUSG00000096499	Ighv1-5	2.27209	0	137.066	35.7413	1.13605	86.4037	-6.22951	1.25725e-06	1.28519e-05
ENSMUSG00000024670	Cd6	13.6325	5.88771	799.692	672.982	9.76013	736.337	-6.23028	4.30193e-38	7.56454e-36
ENSMUSG00000073008	Gpr174	12.4965	8.24279	1026.73	548.323	10.3696	787.529	-6.24378	9.4624e-34	1.22223e-31
ENSMUSG00000050350	Gpr18	9.08836	3.53263	608.809	367.873	6.3105	488.341	-6.26613	3.49357e-26	2.76942e-24
ENSMUSG00000104554	Gm4610	1.13605	0	66.4308	22.6652	0.568023	44.548	-6.26997	0.000218123	0.00127198
ENSMUSG00000057337	Chst3	34.0814	16.4856	2589.12	1352.94	25.2835	1971.03	-6.28113	6.97413e-46	2.56024e-43
ENSMUSG00000020914	Top2a	31.8093	21.1958	2774.12	1363.4	26.5025	2068.76	-6.28452	9.15447e-48	3.83114e-45
ENSMUSG00000038421	Fcrla	17.0407	8.24279	1202.48	781.077	12.6417	991.78	-6.28839	4.33663e-41	1.0196e-38
ENSMUSG00000095574	Trbv12-1	0	0	20.1815	13.0761	0	16.6288	-6.2887	0.0014123	0.00644826
ENSMUSG00000003309	Ap1m2	0	2.35508	69.7944	112.454	1.17754	91.1243	-6.29565	1.48461e-07	1.82309e-06
ENSMUSG00000105646	Gm30211	2.27209	4.71017	354.858	191.782	3.49113	273.32	-6.29793	4.01789e-17	1.60447e-15
ENSMUSG00000022015	Tnfsf11	4.54418	0	263.201	99.3781	2.27209	181.289	-6.29926	2.0701e-11	4.61309e-10
ENSMUSG00000047880	Cxcr5	17.0407	16.4856	1644.79	1000.76	16.7631	1322.77	-6.30197	3.15782e-48	1.34852e-45
ENSMUSG00000021697	Depdc1b	2.27209	0	93.3395	88.9173	1.13605	91.1284	-6.30384	1.03214e-07	1.30419e-06
ENSMUSG00000026989	Dapl1	1.13605	1.17754	107.635	76.713	1.15679	92.1738	-6.31677	9.27752e-08	1.18013e-06
ENSMUSG00000076484	Trbj1-2	0	0	25.2269	9.58912	0	17.408	-6.35507	0.00133477	0.00615333
ENSMUSG00000041064	Pif1	2.27209	0	109.317	80.1999	1.13605	94.7582	-6.3604	8.30894e-08	1.06665e-06
ENSMUSG00000114761	Gm47242	0	0	12.6134	22.6652	0	17.6393	-6.37307	0.00109097	0.00517887
ENSMUSG00000017723	Wfdc2	0	3.53263	135.384	156.041	1.76631	145.713	-6.38817	6.02262e-11	1.26402e-09
ENSMUSG00000020279	Il9r	6.81627	7.06525	701.308	465.508	6.94076	583.408	-6.39372	4.73082e-31	5.23769e-29
ENSMUSG00000096596	Gm10591	0	0	14.2952	21.7935	0	18.0443	-6.40593	0.000929095	0.00451598
ENSMUSG00000070419	Cyp3a57	0	1.17754	65.5899	33.126	0.588771	49.358	-6.41397	0.000102538	0.000664069
ENSMUSG00000050440	Hamp	0	0	26.0678	10.4609	0	18.2643	-6.42432	0.00102789	0.00492864
ENSMUSG00000095174	Gm20069	0	0	21.0224	15.6913	0	18.3568	-6.43123	0.000827457	0.00406922
ENSMUSG00000076570	Igkv12-38	1.13605	0	64.749	36.613	0.568023	50.681	-6.45549	8.39238e-05	0.000555554
ENSMUSG00000028175	Depdc1a	2.27209	0	153.884	49.6891	1.13605	101.787	-6.46504	1.98579e-07	2.37715e-06
ENSMUSG00000033765	Calm4	0	0	18.4997	19.1782	0	18.839	-6.46839	0.000704035	0.00353983
ENSMUSG00000106567	2010309G21Rik	0	0	19.3406	19.1782	0	19.2594	-6.50026	0.00062503	0.00320636
ENSMUSG00000118495	Gm21011	1.13605	0	66.4308	40.1	0.568023	53.2654	-6.52713	6.2644e-05	0.000428374
ENSMUSG00000094902	Igkv10-95	0	0	21.0224	18.3065	0	19.6645	-6.53039	0.000561595	0.00292687
ENSMUSG00000040276	Pacsin1	1.13605	4.71017	296.836	247.574	2.92311	272.205	-6.55437	1.09589e-17	4.55895e-16
ENSMUSG00000113599	9530014B07Rik	0	0	26.9087	13.9478	0	20.4282	-6.58572	0.000517428	0.00272176
ENSMUSG00000061947	Serpina10	4.54418	0	265.723	179.578	2.27209	222.651	-6.59354	2.11267e-14	6.5203e-13
ENSMUSG00000030745	Il21r	12.4965	21.1958	2054.31	1194.28	16.8461	1624.3	-6.5949	3.5112e-50	1.792e-47
ENSMUSG00000111118	Gm6545	3.40814	1.17754	195.088	254.548	2.29284	224.818	-6.60472	5.37688e-15	1.77183e-13
ENSMUSG00000076589	Igkv8-18	0	0	27.7496	13.9478	0	20.8487	-6.61513	0.000469276	0.00250527
ENSMUSG00000024402	Lta	1.13605	1.17754	140.43	88.9173	1.15679	114.673	-6.63193	1.30584e-08	1.93244e-07
ENSMUSG00000041538	H2-Ob	37.4895	35.3263	4879.72	2358.05	36.4079	3618.89	-6.63493	4.69517e-60	5.45814e-57
ENSMUSG00000015314	Slamf6	13.6325	10.5979	1700.29	771.488	12.1152	1235.89	-6.67088	3.7777e-39	7.31929e-37
ENSMUSG00000086410	Gm16158	0	0	25.2269	18.3065	0	21.7667	-6.67706	0.000329146	0.00182926
ENSMUSG00000022900	Ildr1	2.27209	1.17754	182.475	175.219	1.72482	178.847	-6.68902	1.93996e-12	4.89081e-11
ENSMUSG00000085823	Gm13012	0	1.17754	75.6807	44.4586	0.588771	60.0697	-6.69755	3.35472e-05	0.000246048
ENSMUSG00000076476	Trbv20	0	0	27.7496	16.563	0	22.1563	-6.70278	0.000314984	0.00175527
ENSMUSG00000052951	C130021I20Rik	2.27209	0	84.9305	157.785	1.13605	121.358	-6.71667	1.20804e-08	1.80173e-07
ENSMUSG00000022876	Samsn1	20.4488	8.24279	2256.97	795.897	14.3458	1526.43	-6.72868	1.81744e-34	2.53532e-32
ENSMUSG00000028362	Tnfsf8	4.54418	3.53263	592.832	266.752	4.0384	429.792	-6.73149	2.43655e-21	1.35959e-19
ENSMUSG00000076497	Trbj2-7	0	0	25.2269	20.9217	0	23.0743	-6.76112	0.000230665	0.0013337
ENSMUSG00000052013	Btla	24.993	29.4386	4031.26	1982.33	27.2158	3006.79	-6.78853	1.14414e-58	1.08823e-55
ENSMUSG00000051397	Tacstd2	3.40814	0	99.2258	285.93	1.70407	192.578	-6.79951	3.65246e-11	7.87915e-10
ENSMUSG00000053044	Cd8b1	9.08836	5.88771	1000.67	677.341	7.48804	839.004	-6.80398	4.22087e-38	7.4849e-36
ENSMUSG00000076480	Trbv29	0	0	28.5905	19.1782	0	23.8844	-6.81105	0.000197928	0.00116981
ENSMUSG00000076539	Igkv4-81	0	0	21.8633	26.1521	0	24.0077	-6.81806	0.000183201	0.00109403
ENSMUSG00000076499	Trbv31	0	0	21.0224	27.0239	0	24.0231	-6.81893	0.000184724	0.00110092
ENSMUSG00000027376	Prom2	1.13605	2.35508	297.677	95.0195	1.74556	196.348	-6.82114	2.72211e-11	5.97066e-10
ENSMUSG00000047898	Ccr4	1.13605	3.53263	353.176	173.476	2.33434	263.326	-6.82883	4.09139e-15	1.36326e-13
ENSMUSG00000087452	Gm11998	0	0	28.5905	20.05	0	24.3202	-6.83711	0.000176019	0.00105839
ENSMUSG00000094027	Gm21762	0	0	27.7496	20.9217	0	24.3356	-6.83798	0.000172308	0.00103909
ENSMUSG00000079071	Slc28a2b	1.13605	3.53263	362.426	169.989	2.33434	266.208	-6.84447	4.75814e-15	1.57788e-13
ENSMUSG00000024673	Ms4a1	70.4348	20.0182	7588.25	2987.45	45.2265	5287.85	-6.86864	1.0608e-11	2.46909e-10
ENSMUSG00000113136	Gm19951	5.68023	2.35508	645.808	299.006	4.01766	472.407	-6.8697	2.28289e-22	1.38462e-20
ENSMUSG00000076552	Igkv4-61	1.13605	1.17754	173.225	97.6347	1.15679	135.43	-6.87197	3.09135e-09	5.06551e-08
ENSMUSG00000032446	Eomes	3.40814	3.53263	519.674	295.519	3.47038	407.597	-6.87645	1.3753e-21	7.92785e-20
ENSMUSG00000028072	Ntrk1	0	2.35508	129.498	143.837	1.17754	136.667	-6.88188	1.65507e-09	2.82714e-08
ENSMUSG00000047293	Gpr15	0	0	24.386	26.1521	0	25.2691	-6.89201	0.000134059	0.000834626
ENSMUSG00000028460	Sit1	1.13605	1.17754	154.725	121.172	1.15679	137.948	-6.89841	1.47423e-09	2.54104e-08
ENSMUSG00000024334	H2-Oa	10.2244	0	769.42	454.176	5.11221	611.798	-6.90005	0.000517402	0.00272176
ENSMUSG00000053977	Cd8a	11.3605	16.4856	2056.83	1268.38	13.923	1662.61	-6.90278	6.81392e-54	4.32064e-51
ENSMUSG00000061356	Nuggc	0	3.53263	285.064	131.632	1.76631	208.348	-6.90403	3.02386e-12	7.47922e-11
ENSMUSG00000024675	Ms4a4c	4.54418	8.24279	895.555	630.267	6.39349	762.911	-6.90458	1.2272e-35	1.91635e-33
ENSMUSG00000101905	4930439D14Rik	0	0	27.7496	23.5369	0	25.6433	-6.9134	0.000123935	0.000779432
ENSMUSG00000030775	Trat1	1.13605	4.71017	528.924	175.219	2.92311	352.072	-6.92423	1.7177e-16	6.51576e-15
ENSMUSG00000076472	Trbv15	0	0	39.5221	12.2043	0	25.8632	-6.92627	0.000188451	0.00112027
ENSMUSG00000022696	Sidt1	5.68023	5.88771	843.419	568.373	5.78397	705.896	-6.93171	1.88186e-33	2.37217e-31
ENSMUSG00000020330	Hmmr	3.40814	1.17754	403.63	161.272	2.29284	282.451	-6.93497	5.84021e-15	1.91847e-13
ENSMUSG00000108289	Gm44174	0	0	23.5451	28.7674	0	26.1562	-6.9417	0.00011077	0.00070818
ENSMUSG00000031780	Ccl17	0	0	32.795	20.05	0	26.4225	-6.95681	0.000113304	0.000720854
ENSMUSG00000026009	Icos	5.68023	12.953	1708.7	628.523	9.3166	1168.61	-6.97648	4.12737e-33	5.17157e-31
ENSMUSG00000076479	Trbv26	0	0	33.6359	20.05	0	26.8429	-6.9796	0.000104251	0.000673287
ENSMUSG00000028678	Kif2c	2.27209	0	179.952	112.454	1.13605	146.203	-6.9854	1.33549e-09	2.31718e-08
ENSMUSG00000026258	Snorc	0	0	22.7042	31.3826	0	27.0434	-6.98973	9.32224e-05	0.000611306
ENSMUSG00000083494	Gm12873	0	0	36.9994	17.4348	0	27.2171	-6.99971	0.000107909	0.00069349
ENSMUSG00000076487	Trbj1-5	0	0	33.6359	21.7935	0	27.7147	-7.02566	8.33332e-05	0.000552518
ENSMUSG00000076709	Ighv1-47	0	3.53263	202.656	254.548	1.76631	228.602	-7.03873	8.28863e-14	2.38898e-12
ENSMUSG00000047222	Rnase2a	0	0	36.1585	20.05	0	28.1043	-7.04589	8.1936e-05	0.000544191
ENSMUSG00000076473	Trbv16	1.13605	0	89.135	65.3804	0.568023	77.2577	-7.0631	7.42688e-06	6.36655e-05
ENSMUSG00000030724	Cd19	29.5372	11.7754	3525.04	2045.97	20.6563	2785.5	-7.07012	5.35846e-58	4.87504e-55
ENSMUSG00000076633	Ighv5-2	0	0	23.5451	33.9978	0	28.7714	-7.07906	6.49093e-05	0.000441755
ENSMUSG00000026581	Sell	46.5779	30.6161	6902.08	3703.14	38.597	5302.61	-7.10029	4.12936e-73	8.64068e-70
ENSMUSG00000059994	Fcrl1	3.40814	8.24279	953.577	641.599	5.82547	797.588	-7.10552	6.25902e-35	8.87779e-33
ENSMUSG00000071068	Treml2	7.95232	7.06525	1253.78	818.562	7.50879	1036.17	-7.10742	6.44005e-42	1.66368e-39
ENSMUSG00000094993	Igkv4-51	0	0	36.1585	22.6652	0	29.4119	-7.11143	5.88872e-05	0.00040694
ENSMUSG00000024331	Dsc2	3.40814	0	320.382	160.4	1.70407	240.391	-7.11871	2.65972e-13	7.29419e-12
ENSMUSG00000029304	Spp1	2.27209	12.953	25.2269	2092.17	7.61253	1058.7	-7.12076	0.00161434	0.0072474
ENSMUSG00000000861	Bcl11a	9.08836	7.06525	1494.27	795.025	8.07681	1144.65	-7.14478	1.90898e-40	4.12042e-38
ENSMUSG00000049109	Themis	5.68023	2.35508	864.442	316.441	4.01766	590.441	-7.19174	4.8831e-23	3.16343e-21
ENSMUSG00000026994	Galnt3	0	1.17754	82.4078	95.8912	0.588771	89.1495	-7.26718	3.0809e-06	2.88447e-05
ENSMUSG00000028699	Tspan1	0	1.17754	79.0443	104.609	0.588771	91.8264	-7.30977	2.70215e-06	2.56212e-05
ENSMUSG00000040314	Ctsg	2.27209	0	124.453	252.804	1.13605	188.628	-7.35242	1.68183e-10	3.32316e-09
ENSMUSG00000116957	Gm34680	0	0	30.2723	40.1	0	35.1861	-7.3695	1.78702e-05	0.00014026
ENSMUSG00000068105	Tnfrsf13c	7.95232	4.71017	1338.71	849.945	6.33124	1094.33	-7.42837	8.06272e-41	1.83383e-38
ENSMUSG00000104927	Gm43388	1.13605	0	126.975	72.3543	0.568023	99.6648	-7.43053	1.98577e-06	1.95172e-05
ENSMUSG00000022416	Cacna1i	5.68023	3.53263	1008.23	610.217	4.60643	809.226	-7.45205	1.50072e-32	1.79443e-30
ENSMUSG00000037944	Ccr7	5.68023	11.7754	1867.63	1185.56	8.72782	1526.6	-7.45694	1.38802e-49	6.75448e-47
ENSMUSG00000096594	Igkv8-19	3.40814	0	199.292	414.076	1.70407	306.684	-7.46937	9.28605e-15	2.98022e-13
ENSMUSG00000105128	Gm42870	2.27209	0	290.95	120.3	1.13605	205.625	-7.47769	1.16871e-10	2.35877e-09
ENSMUSG00000076571	Igkv5-37	0	0	16.8179	59.2782	0	38.0481	-7.48187	2.18883e-05	0.00016814
ENSMUSG00000008193	Spib	18.1767	9.42034	3017.14	1994.54	13.7985	2505.84	-7.49955	9.13325e-66	1.4701e-62
ENSMUSG00000096649	Ighv1-31	0	0	62.2263	14.8195	0	38.5229	-7.50109	2.39952e-05	0.000182714
ENSMUSG00000036853	Mcoln3	1.13605	0	129.498	81.9434	0.568023	105.721	-7.51551	1.29874e-06	1.32309e-05
ENSMUSG00000026616	Cr2	13.6325	15.308	3460.29	1848.08	14.4703	2654.19	-7.51994	1.62364e-61	2.12341e-58
ENSMUSG00000016283	H2-M2	2.27209	2.35508	534.81	339.978	2.31359	437.394	-7.56321	3.32335e-20	1.70444e-18
ENSMUSG00000076474	Trbv17	0	0	43.7266	37.4847	0	40.6057	-7.57649	6.77725e-06	5.86735e-05
ENSMUSG00000051497	Kcnj16	1.13605	0	97.544	123.787	0.568023	110.665	-7.58094	8.74755e-07	9.21666e-06
ENSMUSG00000022435	Upk3a	0	0	63.9081	18.3065	0	41.1073	-7.59472	1.35547e-05	0.000109468
ENSMUSG00000027379	Bub1	2.27209	0	322.904	128.146	1.13605	225.525	-7.61092	5.11961e-11	1.08759e-09
ENSMUSG00000094525	Trbv12-2	0	0	52.1356	32.2543	0	42.1949	-7.6321	5.983e-06	5.26027e-05
ENSMUSG00000051079	Rgs13	0	1.17754	169.02	61.0217	0.588771	115.021	-7.63509	1.35609e-06	1.37749e-05
ENSMUSG00000041431	Ccnb1	0	3.53263	471.743	222.293	1.76631	347.018	-7.64076	1.59927e-15	5.49503e-14
ENSMUSG00000094951	Ighv5-6	3.40814	3.53263	347.29	1039.11	3.47038	693.201	-7.64224	1.39652e-23	9.45699e-22
ENSMUSG00000000182	Fgf23	0	0	59.7036	27.0239	0	43.3638	-7.67167	6.28706e-06	5.49933e-05
ENSMUSG00000076475	Trbv19	0	0	64.749	25.2804	0	45.0147	-7.72563	5.65772e-06	5.00583e-05
ENSMUSG00000039396	Neil3	1.13605	0	157.248	88.0456	0.568023	122.647	-7.72976	5.87669e-07	6.44157e-06
ENSMUSG00000113094	Gm47447	0	0	64.749	26.1521	0	45.4506	-7.73952	5.1504e-06	4.60171e-05
ENSMUSG00000076670	Ighv3-5	0	0	84.9305	6.10217	0	45.5164	-7.74113	0.0150259	0.047359
ENSMUSG00000116274	Gm18724	0	0	57.181	34.8695	0	46.0252	-7.75746	3.39503e-06	3.15563e-05
ENSMUSG00000100615	Gm5511	0	0	63.9081	28.7674	0	46.3377	-7.76737	4.11188e-06	3.75725e-05
ENSMUSG00000076462	Trbv2	0	0	62.2263	30.5108	0	46.3686	-7.76829	3.8008e-06	3.4959e-05
ENSMUSG00000037991	Rmi2	0	1.17754	165.657	88.9173	0.588771	127.287	-7.78148	4.91372e-07	5.47495e-06
ENSMUSG00000031289	Il13ra2	0	1.17754	179.952	76.713	0.588771	128.332	-7.79321	5.94267e-07	6.50709e-06
ENSMUSG00000054889	Dsp	1.13605	1.17754	176.588	337.363	1.15679	256.975	-7.79552	4.33965e-12	1.05713e-10
ENSMUSG00000027072	Prg3	0	0	33.6359	61.0217	0	47.3288	-7.79702	3.03073e-06	2.84131e-05
ENSMUSG00000051378	Kif18b	0	1.17754	161.452	95.8912	0.588771	128.672	-7.7971	4.20371e-07	4.74192e-06
ENSMUSG00000096078	Ighv1-62-2	0	1.17754	192.565	65.3804	0.588771	128.973	-7.80028	7.52193e-07	8.06333e-06
ENSMUSG00000030577	Cd22	23.857	12.953	5294.28	3007.5	18.405	4150.89	-7.81322	1.38308e-73	3.21566e-70
ENSMUSG00000009350	Mpo	3.40814	2.35508	344.768	971.116	2.88161	657.942	-7.83108	1.83874e-22	1.12174e-20
ENSMUSG00000020297	Nsg2	3.40814	2.35508	870.328	509.095	2.88161	689.711	-7.89906	4.82604e-26	3.79643e-24
ENSMUSG00000076596	Igkv3-10	3.40814	0	467.538	367.002	1.70407	417.27	-7.91262	5.13761e-18	2.18505e-16
ENSMUSG00000076471	Trbv14	0	0	68.9535	35.7413	0	52.3474	-7.94323	1.62196e-06	1.62002e-05
ENSMUSG00000076550	Igkv4-63	2.27209	0	206.02	369.617	1.13605	287.818	-7.96142	1.13248e-12	2.91837e-11
ENSMUSG00000026919	Lcn4	0	0	63.0672	48.8173	0	55.9423	-8.03882	7.90946e-07	8.41411e-06
ENSMUSG00000042474	Fcmr	12.4965	0	2147.65	1387.81	6.24825	1767.73	-8.14201	9.54294e-05	0.000622657
ENSMUSG00000062148	Ear6	0	0	59.7036	61.8934	0	60.7985	-8.15871	4.19195e-07	4.73376e-06
ENSMUSG00000014030	Pax5	15.9046	11.7754	5305.22	2738.13	13.84	4021.67	-8.1806	3.23099e-70	6.14623e-67
ENSMUSG00000045394	Epcam	4.54418	2.35508	542.378	1468.88	3.44963	1005.63	-8.18101	4.16151e-28	3.73732e-26
ENSMUSG00000000303	Cdh1	2.27209	2.35508	364.108	980.705	2.31359	672.407	-8.18329	1.82064e-21	1.03806e-19
ENSMUSG00000076604	Igkj1	0	0	72.3171	51.4325	0	61.8748	-8.18428	4.08783e-07	4.63118e-06
ENSMUSG00000094509	Ighv14-1	0	0	75.6807	48.8173	0	62.249	-8.19304	4.17231e-07	4.71667e-06
ENSMUSG00000094094	Igkv5-45	0	0	74.8398	50.5608	0	62.7003	-8.20343	3.84472e-07	4.3747e-06
ENSMUSG00000105826	Gm42141	0	0	84.9305	42.7152	0	63.8229	-8.22918	4.3557e-07	4.8949e-06
ENSMUSG00000028262	Clca3a2	2.27209	5.88771	290.109	2155.81	4.0799	1222.96	-8.23038	1.93147e-08	2.77202e-07
ENSMUSG00000021749	Fam3d	0	0	67.2717	64.5086	0	65.8902	-8.27479	2.37378e-07	2.79839e-06
ENSMUSG00000094787	Ighv1-54	1.13605	0	236.292	122.043	0.568023	179.168	-8.27641	6.32017e-08	8.28632e-07
ENSMUSG00000044453	Ffar1	2.27209	0	490.243	225.78	1.13605	358.011	-8.27684	1.90827e-13	5.31699e-12
ENSMUSG00000116433	Gm49553	0	0	97.544	35.7413	0	66.6426	-8.29164	4.66547e-07	5.22059e-06
ENSMUSG00000050520	Cldn8	0	0	43.7266	91.5325	0	67.6296	-8.31193	3.09741e-07	3.5769e-06
ENSMUSG00000035557	Krt17	0	0	36.1585	101.122	0	68.6401	-8.33324	3.96329e-07	4.49739e-06
ENSMUSG00000076578	Igkv6-29	0	0	106.794	33.9978	0	70.3958	-8.37071	3.88568e-07	4.4189e-06
ENSMUSG00000095429	Ighv5-12	0	0	123.612	17.4348	0	70.5233	-8.37284	0.00199516	0.0086886
ENSMUSG00000025433	Crisp3	0	0	106.794	34.8695	0	70.8317	-8.37961	3.60463e-07	4.10822e-06
ENSMUSG00000044393	Dsg2	0	3.53263	607.127	553.554	1.76631	580.34	-8.38416	1.06836e-20	5.64532e-19
ENSMUSG00000096498	Ighv2-5	0	0	74.8398	68.8673	0	71.8535	-8.39981	1.28556e-07	1.59362e-06
ENSMUSG00000032068	Plet1	0	1.17754	63.9081	338.234	0.588771	201.071	-8.44	1.24274e-07	1.54329e-06
ENSMUSG00000012350	Ehf	0	2.35508	262.36	564.886	1.17754	413.623	-8.47989	3.41109e-14	1.02997e-12
ENSMUSG00000095859	Ighv1-43	0	0	134.543	19.1782	0	76.8608	-8.49699	0.00164711	0.00737077
ENSMUSG00000001504	Irx2	2.27209	0	124.453	711.338	1.13605	417.895	-8.51119	6.69092e-06	5.79981e-05
ENSMUSG00000033860	Fgg	0	0	56.3401	101.993	0	79.1667	-8.53924	8.88463e-08	1.1336e-06
ENSMUSG00000024681	Ms4a3	0	0	66.4308	106.352	0	86.3914	-8.6653	4.23973e-08	5.73844e-07
ENSMUSG00000076548	Igkv4-69	1.13605	0	432.221	40.9717	0.568023	236.596	-8.681	0.000146191	0.000901308
ENSMUSG00000095682	Igkv3-1	1.13605	0	415.403	58.4065	0.568023	236.905	-8.68237	4.56281e-05	0.000323213
ENSMUSG00000039691	Tspan10	0	0	97.544	80.1999	0	88.8719	-8.70656	2.86019e-08	3.982e-07
ENSMUSG00000099696	2900052N01Rik	0	0	105.112	75.8412	0	90.4766	-8.73245	2.70308e-08	3.78594e-07
ENSMUSG00000067577	A430093F15Rik	0	0	110.157	71.4825	0	90.82	-8.73797	2.85687e-08	3.98002e-07
ENSMUSG00000040627	Aicda	0	1.17754	409.517	135.991	0.588771	272.754	-8.88098	8.22913e-09	1.26058e-07
ENSMUSG00000105160	A530030E21Rik	0	1.17754	402.789	147.324	0.588771	275.057	-8.89317	6.72141e-09	1.04881e-07
ENSMUSG00000076540	Igkv4-80	0	1.17754	343.086	207.474	0.588771	275.28	-8.89454	3.35821e-09	5.47279e-08
ENSMUSG00000040405	Havcr1	0	1.17754	365.79	188.295	0.588771	277.043	-8.90371	3.92439e-09	6.35095e-08
ENSMUSG00000072849	Serpina1e	1.13605	0	345.608	220.55	0.568023	283.079	-8.93598	2.65366e-09	4.36883e-08
ENSMUSG00000018569	Cldn7	0	0	63.0672	145.58	0	104.324	-8.93729	1.7134e-08	2.48288e-07
ENSMUSG00000043592	Unc5cl	0	0	109.317	106.352	0	107.834	-8.98546	6.62882e-09	1.03514e-07
ENSMUSG00000029375	Cxcl15	0	0	96.7031	125.53	0	111.117	-9.02854	5.77151e-09	9.11463e-08
ENSMUSG00000031132	Cd40lg	0	0	137.066	88.9173	0	112.992	-9.05309	5.85122e-09	9.23354e-08
ENSMUSG00000038765	Lmx1b	0	0	81.567	147.324	0	114.445	-9.07097	6.35991e-09	9.96862e-08
ENSMUSG00000094491	Igkv1-133	0	1.17754	371.676	265.008	0.588771	318.342	-9.10427	1.0762e-09	1.88921e-08
ENSMUSG00000003051	Elf3	0	0	52.1356	189.167	0	120.651	-9.14704	1.27559e-08	1.89168e-07
ENSMUSG00000027737	Slc7a11	1.13605	0	454.084	217.935	0.568023	336.009	-9.18338	1.21553e-09	2.11959e-08
ENSMUSG00000005540	Fcer2a	2.27209	5.88771	3112.16	1673.74	4.0799	2392.95	-9.20552	4.47808e-45	1.39856e-42
ENSMUSG00000076541	Igkv4-79	0	0	156.407	98.5064	0	127.457	-9.22689	2.49131e-09	4.11449e-08
ENSMUSG00000000983	Wfdc18	0	1.17754	121.089	580.578	0.588771	350.833	-9.24344	3.60372e-09	5.86831e-08
ENSMUSG00000096410	Ighv1-19	1.13605	0	416.244	287.674	0.568023	351.959	-9.25006	5.61706e-10	1.03012e-08
ENSMUSG00000031779	Ccl22	2.27209	2.35508	1859.22	987.679	2.31359	1423.45	-9.26552	3.16455e-30	3.34435e-28
ENSMUSG00000044309	Apol7c	3.40814	1.17754	1846.61	999.884	2.29284	1423.25	-9.26681	2.92698e-30	3.10898e-28
ENSMUSG00000052234	Epx	0	0	116.044	150.811	0	133.427	-9.29252	1.48635e-09	2.55983e-08
ENSMUSG00000067006	Serpinb5	0	0	64.749	210.961	0	137.855	-9.33938	4.19733e-09	6.7665e-08
ENSMUSG00000094134	Ighv5-15	0	1.17754	752.602	10.4609	0.588771	381.532	-9.35435	0.0013331	0.00614838
ENSMUSG00000068154	Insm1	0	0	161.452	130.761	0	146.106	-9.42377	7.28086e-10	1.3055e-08
ENSMUSG00000022057	Adamdec1	0	0	146.316	150.811	0	148.563	-9.44768	6.03677e-10	1.09748e-08
ENSMUSG00000005696	Sh2d1a	0	0	233.769	97.6347	0	165.702	-9.60555	6.56092e-10	1.18453e-08
ENSMUSG00000037973	Itprid1	0	0	56.3401	276.341	0	166.341	-9.61068	6.10202e-05	0.000419602
ENSMUSG00000095923	Ighv1-37	0	0	10.9317	333.004	0	171.968	-9.65862	0.00733211	0.0261756
ENSMUSG00000076512	Igkv9-123	0	0	346.449	7.84564	0	177.147	-9.70147	0.0103667	0.0350101
ENSMUSG00000025927	Tfap2b	0	0	138.748	276.341	0	207.544	-9.92977	9.14971e-11	1.8752e-09
ENSMUSG00000095704	Gm8221	0	0	268.246	149.067	0	208.657	-9.938	7.46295e-11	1.54463e-09
ENSMUSG00000041782	Lad1	0	0	203.497	239.728	0	221.612	-10.0246	2.96152e-11	6.47542e-10
ENSMUSG00000047501	Cldn4	0	0	135.384	339.978	0	237.681	-10.1254	5.05792e-11	1.07558e-09
ENSMUSG00000094117	Igkv3-12	3.40814	1.17754	1123.44	4105.89	2.29284	2614.66	-10.1491	1.44113e-15	4.968e-14
ENSMUSG00000095761	Ighv1-20	1.13605	0	1321.89	27.8956	0.568023	674.892	-10.1943	0.000258085	0.00147472
ENSMUSG00000040899	Ccr6	1.13605	0	898.918	515.197	0.568023	707.058	-10.2564	5.29548e-12	1.27219e-10
ENSMUSG00000031933	Izumo1r	0	0	369.154	202.243	0	285.698	-10.3913	6.99477e-12	1.66514e-10
ENSMUSG00000035451	Foxa1	0	0	305.245	294.647	0	299.946	-10.4613	2.66052e-12	6.6118e-11
ENSMUSG00000050808	Muc15	0	0	71.4762	530.889	0	301.182	-10.4672	0.000129368	0.000809519
ENSMUSG00000061527	Krt5	0	0	100.067	511.71	0	305.888	-10.4896	1.61755e-05	0.000128453
ENSMUSG00000000385	Tmprss2	0	0	322.063	340.85	0	331.456	-10.6054	1.21099e-12	3.11303e-11
ENSMUSG00000015880	Ncapg	0	0	504.538	167.374	0	335.956	-10.6249	4.52656e-08	6.09121e-07
ENSMUSG00000074934	Grem1	0	0	473.425	285.058	0	379.242	-10.7999	6.58792e-13	1.72531e-11
ENSMUSG00000006269	Atp6v1b1	0	0	110.157	925.786	0	517.972	-11.2494	6.83278e-05	0.000461808
ENSMUSG00000000706	Btn1a1	0	0	62.2263	1547.34	0	804.781	-11.8851	0.000654626	0.00332477
ENSMUSG00000059898	Dsc3	0	0	1191.55	877.84	0	1034.7	-12.2478	1.22993e-16	4.73964e-15
ENSMUSG00000067341	H2-Eb2	0	0	1498.48	682.571	0	1090.52	-12.3237	2.1965e-16	8.26651e-15
ENSMUSG00000001622	Csn3	0	0	265.723	3793.8	0	2029.76	-13.2197	3.0757e-05	0.000227417
ENSMUSG00000047730	Fcgbp	0	0	327.109	4497.3	0	2412.2	-13.4688	1.89313e-05	0.000147757
ENSMUSG00000022491	Glycam1	0	0	9061.5	5990.58	0	7526.04	-15.1104	1.28974e-24	9.14841e-23
ENSMUSG00000087642	Ighe	0	0	43191.8	37669.5	0	40430.7	-17.5359	5.83913e-33	7.27284e-31

## Sheet: Functional enrichment analysis
Category	Term	Count	%	PValue	Genes	List Total	Pop Hits	Pop Total	Fold Enrichment	Bonferroni	Benjamini	FDR	Corresponding to figure S6B and C
GOTERM_BP_FAT	GO:0006955~immune response	266	25.9512	3.30603e-64	IGHV3-5, IL1RN, IGHV3-4, PGLYRP2, GFI1, IGKV4-90, PRF1, SLA2, BACH2, VPREB3, ENDOU, MYB, TNFSF11, CD244A, IL12A, UBASH3A, SKP2, HERC6, IGKV4-86, GBP8, IGKV6-29, UNC13D, FCAMR, CH25H, CD226, SKAP1, IDO1, IGKV4-74, IGKV5-45, TXK, IGHV1-66, FPR1, GATA3, MEFV, SAMSN1, PRKCZ, CRACR2A, KLRK1, TESPA1, CD19, SLAMF8, SLAMF7, SLAMF6, WFDC18, IGKV4-69, KCNN4, SLAMF1, GM10591, H2-EB2, CARMIL2, XCR1, TNFSF14,…	838	2149	20051	2.96167	2.17966e-60	2.17933e-60	1.99221e-60
GOTERM_BP_FAT	GO:0045321~leukocyte activation	192	18.7317	1.39588e-59	RIPOR2, IGHV3-5, IGHV3-4, PGLYRP2, CD80, PRF1, PRDM1, SLA2, TNF, IKZF3, ZC3H12D, SPIB, RAB44, IL18RAP, KLRB1C, SIT1, MYB, TBC1D10C, ENPP1, TNFSF11, IL12A, CD244A, IL13RA2, TNFRSF4, IGHV7-4, EOMES, BTN1A1, THEMIS, RUNX3, LAX1, FOXP3, UNC13D, RUNX2, RUNX1, IGHV1-19, JAML, CD8A, CD226, ADAM8, CLEC4E, TOX, CARD11, IDO1, BLK, BLM, TXK, SH2D2A, IGHV1-66, DTX1, GATA3, RASAL3, PRKCZ, SAMSN1, RASGRP1, CRA…	838	1241	20051	3.70187	9.20306e-56	4.60083e-56	4.2058e-56
GOTERM_BP_FAT	GO:0046649~lymphocyte activation	172	16.7805	6.38854e-57	RIPOR2, IGHV3-5, IGHV3-4, PGLYRP2, CD80, PRF1, PRDM1, SLA2, IKZF3, ZC3H12D, SPIB, KLRB1C, SIT1, MYB, TBC1D10C, ENPP1, TNFSF11, IL12A, CD244A, TNFRSF4, IGHV7-4, EOMES, BTN1A1, THEMIS, RUNX3, LAX1, FOXP3, UNC13D, RUNX2, RUNX1, IGHV1-19, JAML, CD8A, ADAM8, CLEC4E, TOX, CARD11, IDO1, BLK, BLM, TXK, SH2D2A, IGHV1-66, DTX1, GATA3, RASAL3, PRKCZ, SAMSN1, RASGRP1, CRACR2A, FUT7, KLRK1, TESPA1, CD19, BTLA…	838	1044	20051	3.94203	4.21197e-53	1.40378e-53	1.28325e-53
GOTERM_BP_FAT	GO:0001775~cell activation	196	19.122	2.48998e-55	IGHV3-5, IGHV3-4, PGLYRP2, PRF1, SLA2, IKZF3, ZC3H12D, SPIB, MYB, TBC1D10C, TNFSF11, CD244A, IL12A, RUNX3, RUNX2, UNC13D, RUNX1, CD226, IDO1, TXK, SH2D2A, IGHV1-66, GATA3, SAMSN1, PRKCZ, CRACR2A, KLRK1, TESPA1, CD19, SLAMF8, SLAMF7, SLAMF6, ICOS, SLAMF1, H2-EB2, CARMIL2, EGR3, TNFSF14, BCL11B, BCL11A, PRG3, TREML2, CD28, CD27, TNFSF8, HAMP, GPR18, CD22, GAPT, ITK, CD40, IGHV5-2, IGHV1-43, CD3G, I…	838	1370	20051	3.42316	1.64164e-51	4.10348e-52	3.75115e-52
GOTERM_BP_FAT	GO:0002682~regulation of immune system process	226	22.0488	4.27781e-54	IGHV3-5, IGHV3-4, PGLYRP2, GFI1, SLA2, AQP3, IKZF3, ZC3H12D, VPREB3, MYB, GPR171, TBC1D10C, TNFSF11, CD244A, IL12A, UBASH3A, RUNX3, UNC13D, RUNX1, PADI2, CD226, SKAP1, CD101, IDO1, TXK, IGHV1-66, FPR1, GATA3, MEFV, SAMSN1, PRKCZ, KLRK1, TESPA1, CD19, SLAMF8, SLAMF7, SLAMF6, KCNN4, ICOS, SLAMF1, H2-EB2, CARMIL2, EGR3, TNFSF14, SH2D1A, IFNLR1, TREML4, CD28, CD27, HAMP, GPR18, CD22, ITK, CD40, IGHV5…	838	1806	20051	2.99421	2.82036e-50	5.63987e-51	5.15562e-51
GOTERM_BP_FAT	GO:0002694~regulation of leukocyte activation	141	13.7561	3.59109e-48	RIPOR2, IGHV3-5, IGHV3-4, PGLYRP2, CD80, PRDM1, TNF, IKZF3, ZC3H12D, SIT1, MYB, TBC1D10C, TNFSF11, IL12A, CD244A, IL13RA2, TNFRSF4, IGHV7-4, BTN1A1, RUNX3, LAX1, FOXP3, UNC13D, RUNX1, IGHV1-19, CD226, ADAM8, TOX, CARD11, IDO1, BLK, BLM, IGHV1-66, DTX1, GATA3, RASAL3, PRKCZ, SAMSN1, RASGRP1, KLRK1, TESPA1, CD19, BTLA, SLAMF8, SLAMF7, STAP1, IGHV8-5, TRDC, KLRC1, ICOS, CD300LF, SLAMF1, GM5150, H2-E…	838	823	20051	4.09932	2.36761e-44	3.94541e-45	3.60665e-45
GOTERM_BP_FAT	GO:0050865~regulation of cell activation	143	13.9512	3.57843e-46	RIPOR2, IGHV3-5, IGHV3-4, PGLYRP2, CD80, PRDM1, TNF, IKZF3, ZC3H12D, SIT1, MYB, TBC1D10C, TNFSF11, IL12A, CD244A, IL13RA2, TNFRSF4, IGHV7-4, BTN1A1, RUNX3, LAX1, FOXP3, UNC13D, RUNX1, IGHV1-19, CD226, ADAM8, TOX, CARD11, IDO1, BLK, BLM, TXK, IGHV1-66, DTX1, GATA3, RASAL3, PRKCZ, SAMSN1, RASGRP1, KLRK1, TESPA1, CD19, BTLA, SLAMF8, SLAMF7, STAP1, IGHV8-5, TRDC, KLRC1, ICOS, CD300LF, SLAMF1, GM5150,…	838	878	20051	3.89703	2.35926e-42	3.36986e-43	3.08052e-43
GOTERM_BP_FAT	GO:0002684~positive regulation of immune system process	177	17.2683	1.41177e-45	RIPOR2, IGHV3-5, IGHV3-4, GPR68, IFI213, CD80, ITGA2B, IFI214, SLA2, AQP3, TNF, FCNB, IL18RAP, KLRB1C, MYB, TNFSF11, IL12A, CD244A, UBASH3A, IL13RA2, TNFRSF4, IGHV7-4, BTN1A1, THEMIS, RUNX3, LAX1, FOXP3, UNC13D, RUNX1, IGHV1-19, CD8A, CD226, ADAM8, CLEC4E, TOX, SKAP1, CD101, CARD11, IDO1, BLK, BLM, H2-M2, TXK, IGHV1-66, FPR1, GATA3, MEFV, RASAL3, PRKCZ, RASGRP1, FUT4, FUT7, KLRK1, TESPA1, CD19, S…	838	1318	20051	3.21329	9.30783e-42	1.1633e-42	1.06342e-42
GOTERM_BP_FAT	GO:0051249~regulation of lymphocyte activation	125	12.1951	6.59787e-44	RIPOR2, IGHV3-5, IGHV3-4, PGLYRP2, CD80, PRDM1, IKZF3, ZC3H12D, SIT1, MYB, TBC1D10C, TNFSF11, IL12A, CD244A, TNFRSF4, IGHV7-4, BTN1A1, RUNX3, LAX1, FOXP3, RUNX1, IGHV1-19, ADAM8, TOX, CARD11, IDO1, BLK, BLM, IGHV1-66, DTX1, GATA3, RASAL3, PRKCZ, SAMSN1, RASGRP1, TESPA1, CD19, BTLA, SLAMF8, SLAMF7, IGHV8-5, TRDC, KLRC1, ICOS, SLAMF1, GM5150, H2-EB2, CARMIL2, EGR3, TNFSF14, CD160, TNFRSF9, FANCA, B…	838	708	20051	4.22444	4.34997e-40	4.83257e-41	4.41764e-41
GOTERM_BP_FAT	GO:0050776~regulation of immune response	149	14.5366	2.61056e-37	IGHV3-5, IGHV3-4, PGLYRP2, IFI213, GFI1, IFI214, EPX, SLA2, TNF, FCNB, IL18RAP, KLRB1C, KLRB1F, MYB, IL12A, UBASH3A, IL13RA2, IGHV7-4, CD96, BTN1A1, THEMIS, LAX1, FOXP3, UNC13D, IGHV1-19, CD8A, CD226, ADAM8, CLEC4E, GM6377, SKAP1, CARD11, IDO1, BLK, H2-M2, TXK, IGHV1-66, FPR1, GATA3, MEFV, PRKCZ, SAMSN1, RASGRP1, FUT7, KLRK1, TESPA1, CD19, BTLA, SLAMF8, STAP1, IGHV8-5, TRDC, SLAMF6, KLRC1, KCNN4,…	838	1123	20051	3.17467	1.72114e-33	1.72088e-34	1.57312e-34
GOTERM_BP_FAT	GO:0042110~T cell activation	106	10.3415	5.19087e-37	RIPOR2, CD80, PRDM1, SLA2, ZC3H12D, MYB, ENPP1, TNFSF11, IL12A, CD244A, TNFRSF4, EOMES, BTN1A1, THEMIS, RUNX3, LAX1, FOXP3, RUNX2, RUNX1, JAML, CD8A, ADAM8, CLEC4E, TOX, CARD11, IDO1, BLM, TXK, SH2D2A, DTX1, GATA3, RASAL3, PRKCZ, RASGRP1, CRACR2A, FUT7, TESPA1, BTLA, SLAMF7, SLAMF6, KLRC1, ICOS, SLAMF1, WNT4, GM5150, H2-EB2, CARMIL2, EGR3, BCL11B, TNFSF14, CD160, BCL11A, TNFRSF9, FANCA, BTNL2, TR…	838	601	20051	4.22011	3.42234e-33	3.11074e-34	2.84365e-34
GOTERM_BP_FAT	GO:0002250~adaptive immune response	121	11.8049	6.27157e-37	IGHV3-5, IGHV3-4, PRF1, PRDM1, SLA2, TNF, BACH2, IL18RAP, SIT1, ENPP1, IL12A, CD244A, IL13RA2, IGHV7-4, EOMES, TRGV1, THEMIS, LAX1, FOXP3, UNC13D, FCAMR, IGHV1-19, CD8A, CD226, SKAP1, H2-M2, TXK, IGHV1-66, GATA3, PRKCZ, SAMSN1, CRACR2A, FUT7, KLRK1, CD19, BTLA, IGKV9-129, SLAMF7, TNFRSF17, IGHV8-5, TRDC, SLAMF6, KLRC1, SLAMF1, H2-EB2, CD160, SH2D1A, POU2F2, AICDA, IGHV14-1, TREML4, TARM1, CD28, K…	838	775	20051	3.73573	4.13484e-33	3.44518e-34	3.14937e-34
GOTERM_BP_FAT	GO:0050778~positive regulation of immune response	128	12.4878	4.1693e-34	IGHV3-5, IGHV3-4, IFI213, IFI214, SLA2, TNF, FCNB, IL18RAP, KLRB1C, MYB, IL12A, UBASH3A, IGHV7-4, BTN1A1, THEMIS, LAX1, FOXP3, IGHV1-19, CD8A, CD226, ADAM8, CLEC4E, SKAP1, CARD11, IDO1, BLK, H2-M2, TXK, IGHV1-66, FPR1, GATA3, MEFV, PRKCZ, RASGRP1, KLRK1, TESPA1, CD19, STAP1, IGHV8-5, TRDC, SLAMF6, KLRC1, KCNN4, SLC15A3, CD300LF, SLAMF1, CARMIL2, CD160, SH2D1A, BTNL2, GCSAM, ITGB2L, IGHV14-1, NR4A…	838	916	20051	3.34354	2.74882e-30	2.11416e-31	1.93263e-31
GOTERM_BP_FAT	GO:0007159~leukocyte cell-cell adhesion	89	8.68293	6.44402e-34	SIRPB1B, SIRPB1A, RIPOR2, CD80, CGAS, PTPN22, PRDM1, TNFRSF13C, CD3E, TNF, ZC3H12D, SIT1, MYB, H2-OB, TNFSF11, CTLA4, IL12A, CD244A, MADCAM1, CCR7, CTSG, H2-OA, GM9733, HAVCR2, ARG2, BTN1A1, RHOH, PDCD1LG2, FOXP3, RUNX3, LAX1, RUNX1, IL1A, ZAP70, LCK, IL1B, ADAM8, TOX, SKAP1, CARD11, CHST2, IDO1, SIRPB1C, CX3CR1, BLM, LEF1, DTX1, GATA3, RASAL3, PRKCZ, RASGRP1, FUT4, TSPAN32, NT5E, FUT7, TESPA1, F…	838	463	20051	4.5994	4.24854e-30	3.03421e-31	2.77369e-31
GOTERM_BP_FAT	GO:0002696~positive regulation of leukocyte activation	100	9.7561	1.88659e-33	IGHV3-5, IGHV3-4, CD80, TNF, MYB, TNFSF11, IL12A, CD244A, TNFRSF4, IGHV7-4, RUNX3, FOXP3, RUNX1, IGHV1-19, CD226, ADAM8, TOX, CARD11, BLM, IGHV1-66, GATA3, RASAL3, PRKCZ, RASGRP1, KLRK1, TESPA1, STAP1, IGHV8-5, TRDC, KLRC1, ICOS, SLAMF1, GM5150, H2-EB2, CARMIL2, EGR3, TNFSF14, CD160, BTNL2, ITGB2L, IGHV14-1, NR4A3, CD28, CD27, IL7R, HAMP, NFKBID, ULBP1, IGHV1-5, SIRPB1B, SIRPB1A, CD40, IGHV5-2, I…	838	589	20051	4.06234	1.24383e-29	8.29095e-31	7.57908e-31
GOTERM_BP_FAT	GO:0050867~positive regulation of cell activation	101	9.85366	1.9733e-32	IGHV3-5, IGHV3-4, CD80, TNF, MYB, TNFSF11, IL12A, CD244A, TNFRSF4, IGHV7-4, RUNX3, FOXP3, RUNX1, IGHV1-19, CD226, ADAM8, TOX, CARD11, BLM, IGHV1-66, GATA3, RASAL3, PRKCZ, RASGRP1, KLRK1, TESPA1, STAP1, IGHV8-5, TRDC, KLRC1, ICOS, SLAMF1, GM5150, H2-EB2, CARMIL2, EGR3, TNFSF14, CD160, BTNL2, ITGB2L, IGHV14-1, NR4A3, CD28, CD27, IL7R, HAMP, NFKBID, ULBP1, IGHV1-5, SIRPB1B, SIRPB1A, CD40, IGHV5-2, I…	838	617	20051	3.91677	1.301e-28	8.13e-30	7.43194e-30
GOTERM_BP_FAT	GO:1903037~regulation of leukocyte cell-cell adhesion	83	8.09756	2.82319e-32	SIRPB1B, SIRPB1A, RIPOR2, CD80, CGAS, PTPN22, PRDM1, TNFRSF13C, CD3E, TNF, ZC3H12D, SIT1, MYB, H2-OB, TNFSF11, CTLA4, IL12A, CD244A, CCR7, CTSG, H2-OA, GM9733, HAVCR2, ARG2, BTN1A1, RHOH, PDCD1LG2, FOXP3, RUNX3, LAX1, RUNX1, IL1A, ZAP70, LCK, IL1B, ADAM8, TOX, SKAP1, CARD11, CHST2, IDO1, SIRPB1C, BLM, LEF1, DTX1, GATA3, RASAL3, PRKCZ, RASGRP1, FUT4, TSPAN32, FUT7, TESPA1, FCHO1, TBX21, BTLA, ICOS…	838	423	20051	4.69494	1.86133e-28	1.09473e-29	1.00074e-29
GOTERM_CC_FAT	GO:0009897~external side of plasma membrane	112	10.9268	1.46186e-31	FCMR, IGHV3-5, IGHV3-4, CD80, ITGA2B, LY75, IL5RA, TNF, FCNB, KLRB1C, CD244A, IL13RA2, TNFRSF4, IGHV7-4, TRGV1, BTN1A1, IGHV1-19, CD8A, CD226, CLEC4E, LY6G, RTN4R, H2-M2, IGHV1-66, KLRK1, CD19, BTLA, SLAMF7, IGHV8-5, TRDC, SLAMF6, KLRC1, TRGC4, ICOS, SLAMF1, H2-EB2, XCR1, TNFRSF9, ART2A, ART2B, BTNL2, L1CAM, PLET1, IGHV14-1, SELL, CD28, CD27, KLRD1, IL7R, ULBP1, CD22, IGHV1-5, CD40, IGHV5-2, FLT3…	743	726	16713	3.47014	9.99914e-29	9.99914e-29	9.47287e-29
GOTERM_CC_FAT	GO:0098552~side of membrane	129	12.5854	4.33961e-31	FCMR, IGHV3-5, IGHV3-4, CD80, ITGA2B, LY75, SLA, IL5RA, TNF, FCNB, KLRB1C, CDH1, RGS1, CD244A, IL13RA2, TNFRSF4, IGHV7-4, TRGV1, BTN1A1, IGHV1-19, TIAM1, CD8A, CD226, CLEC4E, LY6G, RTN4R, BLK, H2-M2, IGHV1-66, RASAL3, KLRK1, RACGAP1, CD19, BTLA, SLAMF7, IGHV8-5, TRDC, SLAMF6, KLRC1, TRGC4, ICOS, SLAMF1, H2-EB2, XCR1, TNFRSF9, ART2A, ART2B, BTNL2, L1CAM, PLET1, IGHV14-1, SELL, CD28, CD27, KLRD1, I…	743	945	16713	3.0706	2.96829e-28	1.48415e-28	1.40603e-28
GOTERM_BP_FAT	GO:0050863~regulation of T cell activation	77	7.5122	1.65362e-30	SIRPB1B, SIRPB1A, RIPOR2, CD80, CGAS, PTPN22, PRDM1, TNFRSF13C, CD3E, ZC3H12D, SIT1, MYB, H2-OB, TNFSF11, CTLA4, IL12A, CD244A, CCR7, CTSG, H2-OA, GM9733, HAVCR2, ARG2, BTN1A1, RHOH, PDCD1LG2, FOXP3, RUNX3, LAX1, RUNX1, IL1A, ZAP70, LCK, IL1B, ADAM8, TOX, CARD11, IDO1, SIRPB1C, BLM, LEF1, DTX1, GATA3, RASAL3, PRKCZ, RASGRP1, TSPAN32, TESPA1, FCHO1, TBX21, BTLA, ICOS, IL12RB1, TIGIT, SLAMF1, GM515…	838	385	20051	4.78544	1.09023e-26	6.05594e-28	5.53597e-28
GOTERM_BP_FAT	GO:0016337~single organismal cell-cell adhesion	101	9.85366	4.39429e-30	RIPOR2, IL1RN, CD80, ITGA2B, PRDM1, TNF, ZC3H12D, CDH1, SIT1, MYB, TNFSF11, IL12A, CD244A, BTN1A1, RUNX3, LAX1, FOXP3, RUNX1, ADAM8, TOX, SKAP1, CARD11, DSC2, IDO1, BLK, BLM, DTX1, GATA3, RASAL3, PRKCZ, RASGRP1, FUT4, FUT7, TESPA1, BTLA, ICOS, SLAMF1, GM5150, H2-EB2, CARMIL2, EGR3, TNFSF14, CD160, TNFRSF9, FANCA, BTNL2, L1CAM, ITGB2L, NR4A3, SELL, TARM1, CD28, CD27, IL7R, NFKBID, LAT, SIRPB1B, SI…	838	658	20051	3.67272	2.89715e-26	1.52459e-27	1.39368e-27
GOTERM_BP_FAT	GO:0051251~positive regulation of lymphocyte activation	89	8.68293	8.26375e-30	IGHV1-5, SIRPB1B, SIRPB1A, CD40, IGHV3-5, IGHV3-4, IGHV5-2, CD80, IGHV1-43, PTPN22, IGHV1-47, TNFRSF13C, CD3E, MYB, H2-OB, TNFSF11, IL12A, CD244A, CCR7, H2-OA, GM9733, TNFRSF4, HAVCR2, IGHV5-6, IGHV7-4, IGHV5-12, IGHV1-54, RHOH, IGHV5-15, PDCD1LG2, FOXP3, RUNX3, RUNX1, IGHV1-19, IL1A, ZAP70, LCK, IGHV15-2, IL1B, IGHE, ADAM8, TOX, CARD11, SIRPB1C, BLM, IGHV2-5, IGHV1-20, LEF1, IGHV1-66, NOD2, GATA…	838	523	20051	4.07174	5.44829e-26	2.72373e-27	2.48987e-27
GOTERM_BP_FAT	GO:0006952~defense response	193	18.8293	1.30363e-29	IGHV3-5, IL1RN, IGHV3-4, PGLYRP2, GFI1, PRF1, TNFSF11, CD244A, IL12A, SKP2, HERC6, GBP8, IL1R2, UNC13D, CH25H, CD226, IDO1, TXK, IGHV1-66, FPR1, GATA3, MEFV, PRKCZ, KLRK1, SLAMF8, SLAMF7, SLAMF6, WFDC18, SLAMF1, GM10591, SH2D1A, IL36G, IFNLR1, MARCO, TREML4, CD28, TNFSF8, HAMP, CD40, IGHV5-2, IGHV1-43, STAB2, IGHV1-47, SIGLECG, WFDC2, SERPINA1B, PBK, CTSG, CCR7, CCR6, CCR4, CCR3, IGHV5-6, HAVCR2,…	838	1999	20051	2.31013	8.59483e-26	4.09216e-27	3.7408e-27
GOTERM_BP_FAT	GO:0022407~regulation of cell-cell adhesion	90	8.78049	1.40513e-29	SIRPB1B, SIRPB1A, RIPOR2, IL1RN, CD80, CGAS, PTPN22, PRDM1, TNFRSF13C, CD3E, TNF, ZC3H12D, CDH1, SIT1, MYB, H2-OB, TNFSF11, CTLA4, IL12A, CD244A, CCR7, CTSG, H2-OA, GM9733, HAVCR2, ARG2, BTN1A1, FGG, RHOH, PDCD1LG2, FOXP3, RUNX3, LAX1, RUNX1, IL1A, ZAP70, LCK, IL1B, ADAM8, TOX, SKAP1, CARD11, CHST2, IDO1, SIRPB1C, BLK, BLM, LEF1, DTX1, GATA3, RASAL3, PRKCZ, RASGRP1, FUT4, TSPAN32, FUT7, TESPA1, F…	838	538	20051	4.00269	9.26402e-26	4.21028e-27	3.84878e-27
GOTERM_CC_FAT	GO:0009986~cell surface	155	15.122	1.59333e-29	LY6K, FCMR, IGHV3-5, IGHV3-4, CD80, ITGA2B, LY75, IL5RA, FZD10, TNF, FCNB, KLRB1C, CDH1, KLRB1F, CLEC5A, ENPP1, IL12A, CD244A, IL13RA2, TNFRSF4, IGHV7-4, TRGV1, BTN1A1, IGHV1-19, CD8A, CD226, ADAM8, KIF20A, CLEC4E, LY6G, RTN4R, H2-M2, IGHV1-66, TGFA, LPAR2, HMMR, FUT4, KLRK1, RACGAP1, CD19, BTLA, SLAMF7, IGHV8-5, TRDC, SLAMF6, KLRC1, ECT2, TRGC4, ICOS, RAB11FIP4, SLAMF1, WNT4, PROM2, H2-EB2, XCR1…	743	1336	16713	2.6097	1.08984e-26	3.6328e-27	3.4416e-27
GOTERM_BP_FAT	GO:0002253~activation of immune response	100	9.7561	2.88025e-29	IGHV3-5, IGHV3-4, IFI213, IFI214, SLA2, TNF, FCNB, UBASH3A, IGHV7-4, BTN1A1, THEMIS, LAX1, FOXP3, IGHV1-19, CD8A, CD226, CLEC4E, SKAP1, CARD11, BLK, TXK, IGHV1-66, FPR1, GATA3, MEFV, KLRK1, TESPA1, CD19, STAP1, IGHV8-5, TRDC, KLRC1, KCNN4, SLC15A3, CD300LF, CARMIL2, CD160, SH2D1A, BTNL2, GCSAM, IGHV14-1, NR4A3, TREML4, CD28, KLRD1, NFKBID, CD22, IGHV1-5, ITK, CD40, IGHV5-2, IGHV1-43, CGAS, PTPN22…	838	661	20051	3.61985	1.89895e-25	8.25505e-27	7.54626e-27
GOTERM_BP_FAT	GO:0002757~immune response-activating signal transduction	92	8.97561	3.72406e-29	IGHV1-5, ITK, CD40, IGHV3-5, IGHV3-4, IGHV5-2, IGHV1-43, PTPN22, IGHV1-47, CD3E, SLA2, TNF, FCNB, BLNK, CTLA4, CCR7, UBASH3A, KLRI1, OASL1, HAVCR2, IGHV5-6, IGHV7-4, TASL, FCRL5, IGHV5-12, PVRIG, BTN1A1, IGHV1-54, THEMIS, IGHV5-15, FOXP3, LAX1, IGHV1-19, ZAP70, LCK, IGHV15-2, CD8A, OAS3, TLR12, TLR11, IGHE, CD226, TLR6, CLEC4E, MS4A1, SKAP1, CARD11, TLR13, BLK, IGHV2-5, TXK, IGHV1-20, IGHV1-66, F…	838	568	20051	3.87553	2.45528e-25	1.02288e-26	9.3505e-27
GOTERM_BP_FAT	GO:0002764~immune response-regulating signaling pathway	93	9.07317	5.10237e-29	IGHV1-5, ITK, CD40, IGHV3-5, IGHV3-4, IGHV5-2, IGHV1-43, PTPN22, IGHV1-47, CD3E, SLA2, TNF, FCNB, BLNK, CTLA4, CCR7, UBASH3A, KLRI1, OASL1, HAVCR2, IGHV5-6, IGHV7-4, TASL, FCRL5, IGHV5-12, PVRIG, BTN1A1, IGHV1-54, THEMIS, IGHV5-15, FOXP3, LAX1, IGHV1-19, ZAP70, LCK, IGHV15-2, CD8A, OAS3, TLR12, TLR11, IGHE, CD226, TLR6, CLEC4E, MS4A1, SKAP1, CARD11, TLR13, BLK, IGHV2-5, TXK, IGHV1-20, IGHV1-66, F…	838	582	20051	3.82342	3.364e-25	1.34539e-26	1.22988e-26
GOTERM_BP_FAT	GO:0098602~single organism cell adhesion	106	10.3415	9.01635e-29	RIPOR2, IL1RN, CD80, ITGA2B, PRDM1, TNF, ZC3H12D, CDH1, SIT1, MYB, TNFSF11, IL12A, CD244A, BTN1A1, RUNX3, LAX1, FOXP3, UNC13D, RUNX1, ADAM8, TOX, SKAP1, CARD11, DSC2, IDO1, BLK, BLM, TACSTD2, DTX1, GATA3, RASAL3, PRKCZ, RASGRP1, FUT4, FUT7, TESPA1, BTLA, ICOS, SLAMF1, GM5150, CARMIL1, H2-EB2, CARMIL2, EGR3, TNFSF14, CD160, TNFRSF9, FANCA, BTNL2, L1CAM, ITGB2L, NR4A3, PARVG, SELL, TARM1, CD28, CD2…	838	745	20051	3.40441	5.94448e-25	2.28599e-26	2.08971e-26
GOTERM_BP_FAT	GO:0002440~production of molecular mediator of immune response	78	7.60976	4.08203e-28	IGKV4-51, CD40, IGKV4-50, IGKV4-57-1, IGKV8-18, IGKV4-90, IGKV8-19, CGAS, PTPN22, TREM3, EPX, TNF, SIGLECG, PANX1, VPREB3, IL18RAP, H2-OB, ENPP1, IL12A, CD244A, H2-OA, CCR6, IL13RA2, TNFRSF4, IGKV4-86, IGKV4-63, CD96, IGKV4-61, IGKV6-29, FOXP3, LAX1, IL1B, MZB1, IGHE, IGKV4-58, CD226, CARD11, IGKV1-133, IGKV4-74, IGKV5-45, NOD2, GATA3, PRKCZ, RASGRP1, NUGGC, UNG, IGKV10-95, TBX21, IGKV9-123, IGKV…	838	428	20051	4.36057	2.69128e-24	9.96619e-26	9.11048e-26
GOTERM_BP_FAT	GO:0002768~immune response-regulating cell surface receptor signaling pathway	76	7.41463	2.13027e-27	IGHV1-5, ITK, CD40, IGHV3-5, IGHV3-4, IGHV5-2, IGHV1-43, PTPN22, IGHV1-47, CD3E, SLA2, FCNB, BLNK, CTLA4, CCR7, UBASH3A, KLRI1, IGHV5-6, IGHV7-4, FCRL5, IGHV5-12, PVRIG, BTN1A1, IGHV1-54, THEMIS, IGHV5-15, FOXP3, LAX1, IGHV1-19, ZAP70, LCK, IGHV15-2, CD8A, IGHE, CD226, CLEC4E, MS4A1, SKAP1, CARD11, BLK, IGHV2-5, TXK, IGHV1-20, IGHV1-66, FPR1, GATA3, KLRK1, TESPA1, FCHO1, CD19, BTLA, STAP1, IGHV8-…	838	417	20051	4.36083	1.40449e-23	5.01526e-25	4.58464e-25
GOTERM_BP_FAT	GO:0002252~immune effector process	132	12.878	2.51767e-27	IGHV3-5, IGHV3-4, PGLYRP2, PRF1, EPX, MPO, TNF, VPREB3, FCNB, RAB44, IL18RAP, KLRB1C, KLRB1F, MYB, ENPP1, IL12A, CD244A, SKP2, IL13RA2, TNFRSF4, IGHV7-4, EOMES, CD96, IFIT1BL1, FOXP3, UNC13D, IGHV1-19, CD8A, CD226, CLEC4E, BLK, H2-M2, IGHV1-66, GATA3, PRKCZ, RASGRP1, CRACR2A, FUT7, KLRK1, CD19, SLAMF8, PMAIP1, IGHV8-5, TRDC, SLAMF6, KLRC1, SLAMF1, H2-EB2, CD160, SH2D1A, IFNLR1, POU2F2, AICDA, ITG…	838	1131	20051	2.79257	1.6599e-23	5.72293e-25	5.23155e-25
GOTERM_BP_FAT	GO:0002443~leukocyte mediated immunity	96	9.36585	2.30856e-26	IGHV1-5, CD40, IGHV3-5, IGHV3-4, IGHV5-2, IGHV1-43, PRF1, IGHV1-47, TREM3, TNF, RAB44, KLRB1C, IL18RAP, KLRB1F, H2-OB, ENPP1, IL12A, CTSG, H2-OA, CCR6, IL13RA2, KLRI1, HAVCR2, IGHV5-6, IGHV7-4, H60B, CD96, CR2, IGHV5-12, IGHV1-54, IGHV5-15, FOXP3, UNC13D, IGHV1-19, FGR, IGHV15-2, CD8A, IL1B, LTA, IGHE, CD226, FCER2A, DNASE1L3, IL9R, BLK, IGHV2-5, H2-M2, IGHV1-20, MRGPRB1, IGHV1-66, H2-Q2, NOD2, G…	838	668	20051	3.43864	1.52203e-22	5.07267e-24	4.63712e-24
GOTERM_BP_FAT	GO:0002429~immune response-activating cell surface receptor signaling pathway	73	7.12195	5.11783e-26	IGHV1-5, ITK, IGHV3-5, IGHV3-4, IGHV5-2, IGHV1-43, PTPN22, IGHV1-47, CD3E, SLA2, FCNB, BLNK, CTLA4, CCR7, UBASH3A, KLRI1, IGHV5-6, IGHV7-4, FCRL5, IGHV5-12, PVRIG, BTN1A1, IGHV1-54, THEMIS, IGHV5-15, FOXP3, LAX1, IGHV1-19, ZAP70, LCK, IGHV15-2, CD8A, IGHE, CD226, MS4A1, SKAP1, CARD11, BLK, IGHV2-5, TXK, IGHV1-20, IGHV1-66, FPR1, GATA3, KLRK1, TESPA1, FCHO1, CD19, STAP1, IGHV8-5, TRDC, KLRC1, KCNN…	838	405	20051	4.31281	3.37419e-22	1.08828e-23	9.9484e-24
GOTERM_BP_FAT	GO:0002449~lymphocyte mediated immunity	84	8.19512	5.17754e-25	IGHV1-5, CD40, IGHV3-5, IGHV3-4, IGHV5-2, IGHV1-43, PRF1, IGHV1-47, TNF, KLRB1C, IL18RAP, KLRB1F, H2-OB, ENPP1, IL12A, H2-OA, CCR6, IL13RA2, KLRI1, HAVCR2, IGHV5-6, IGHV7-4, H60B, CD96, CR2, IGHV5-12, IGHV1-54, IGHV5-15, FOXP3, UNC13D, IGHV1-19, IGHV15-2, CD8A, IL1B, LTA, IGHE, CD226, FCER2A, IL9R, IGHV2-5, H2-M2, IGHV1-20, IGHV1-66, H2-Q2, NOD2, GATA3, PRKCZ, RASGRP1, UNG, FUT7, KLRK1, TBX21, CD…	838	547	20051	3.67438	3.41355e-21	1.06657e-22	9.74995e-23
GOTERM_BP_FAT	GO:1903039~positive regulation of leukocyte cell-cell adhesion	59	5.7561	5.84268e-25	SIRPB1B, SIRPB1A, CD80, PTPN22, TNFRSF13C, CD3E, TNF, MYB, H2-OB, TNFSF11, IL12A, CD244A, CCR7, H2-OA, GM9733, HAVCR2, RHOH, PDCD1LG2, FOXP3, RUNX3, RUNX1, IL1A, ZAP70, LCK, IL1B, ADAM8, SKAP1, CARD11, CHST2, SIRPB1C, BLM, LEF1, GATA3, RASAL3, PRKCZ, RASGRP1, FUT4, FUT7, TESPA1, FCHO1, ICOS, IL12RB1, SLAMF1, GM5150, H2-EB2, CARMIL2, EGR3, TNFSF14, CD160, BTNL2, CD4, CD40LG, NR4A3, CD6, CD5, CD28,…	838	276	20051	5.11487	3.85208e-21	1.16712e-22	1.06691e-22
GOTERM_BP_FAT	GO:0098609~cell-cell adhesion	117	11.4146	2.36103e-24	RIPOR2, IL1RN, CD80, ITGA2B, IL1RAP, PRDM1, CELSR1, TNF, ZC3H12D, CDH1, SIT1, MYB, TNFSF11, IL12A, CD244A, BTN1A1, RUNX3, LAX1, FOXP3, RUNX1, CLDN4, CLDN3, JAML, CLDN8, CLDN7, ADAM8, PKP3, CSTDC4, TOX, SKAP1, CARD11, DSC2, IDO1, DSC3, BLK, BLM, DTX1, GATA3, RASAL3, PRKCZ, RASGRP1, FUT4, STFA2L1, FUT7, TESPA1, BTLA, ICOS, SLAMF1, GM5150, H2-EB2, CARMIL2, EGR3, TNFSF14, CD160, TNFRSF9, FANCA, BTNL2…	838	997	20051	2.80791	1.55663e-20	4.57762e-22	4.18458e-22
GOTERM_BP_FAT	GO:0022409~positive regulation of cell-cell adhesion	63	6.14634	2.66293e-24	SIRPB1B, SIRPB1A, CD80, PTPN22, TNFRSF13C, CD3E, TNF, CDH1, MYB, H2-OB, TNFSF11, IL12A, CD244A, CCR7, CTSG, H2-OA, GM9733, HAVCR2, FGG, RHOH, PDCD1LG2, FOXP3, RUNX3, RUNX1, IL1A, ZAP70, LCK, IL1B, ADAM8, SKAP1, CARD11, CHST2, SIRPB1C, BLM, LEF1, GATA3, RASAL3, PRKCZ, RASGRP1, FUT4, FUT7, TESPA1, FCHO1, ICOS, IL12RB1, SLAMF1, GM5150, H2-EB2, CARMIL2, EGR3, TNFSF14, CD160, BTNL2, L1CAM, CD4, CD40LG…	838	324	20051	4.65251	1.75567e-20	5.01543e-22	4.5848e-22
GOTERM_BP_FAT	GO:0050851~antigen receptor-mediated signaling pathway	66	6.43902	1.0793e-23	IGHV1-5, ITK, IGHV3-5, IGHV3-4, IGHV5-2, IGHV1-43, PTPN22, IGHV1-47, CD3E, SLA2, BLNK, CTLA4, CCR7, UBASH3A, IGHV5-6, IGHV7-4, FCRL5, IGHV5-12, PVRIG, BTN1A1, IGHV1-54, THEMIS, IGHV5-15, FOXP3, LAX1, IGHV1-19, ZAP70, LCK, IGHV15-2, CD8A, IGHE, CD226, MS4A1, SKAP1, CARD11, BLK, IGHV2-5, TXK, IGHV1-20, IGHV1-66, GATA3, TESPA1, FCHO1, CD19, STAP1, IGHV8-5, TRDC, KCNN4, IGHV2-9, IGHV1-62-2, CARMIL2, …	838	364	20051	4.33845	7.11582e-20	1.97632e-21	1.80663e-21
GOTERM_BP_FAT	GO:0002460~adaptive immune response based on somatic recombination of immune receptors built from immunoglobulin superfamily domains	82	8	2.05303e-23	IGHV1-5, CD40, IGHV3-5, IGHV3-4, IGHV5-2, IGHV1-43, PRF1, IGHV1-47, TNFRSF13C, TNF, BACH2, IL18RAP, H2-OB, ENPP1, IL12A, CCR7, H2-OA, CCR6, IL13RA2, HAVCR2, IGHV5-6, IGHV7-4, CR2, IGHV5-12, IGHV1-54, IGHV5-15, FOXP3, UNC13D, IGHV1-19, IGHV15-2, CD8A, IL1B, LTA, IGHE, CD226, FCER2A, IL9R, IGHV2-5, H2-M2, IGHV1-20, LEF1, IGHV1-66, H2-Q2, NOD2, GATA3, PRKCZ, UNG, CRACR2A, FUT7, TBX21, CD19, IL21R, I…	838	553	20051	3.54798	1.35356e-19	3.65773e-21	3.34367e-21
GOTERM_BP_FAT	GO:0045087~innate immune response	124	12.0976	2.50597e-23	IGHV3-5, IGHV3-4, IFI213, GFI1, IFI214, SLA, IL1RAP, PRDM1, TNF, RAB43, FCNB, IL18RAP, KLRB1C, KLRB1F, CLEC5A, IL12A, CD244A, SKP2, HERC6, IGHV7-4, CD96, GBP8, IFIT1BL1, UNC13D, IGHV1-19, CH25H, NAIP6, CD226, ADAM8, CLEC4E, GM6377, BLK, TXK, IGHV1-66, GATA3, MEFV, RASGRP1, KLRK1, SLAMF8, SLAMF7, IGHV8-5, TRDC, SLAMF6, WFDC18, KLRC1, SLC15A3, CD300LF, SLAMF1, GM10591, CD160, SH2D1A, IL36G, IFNLR1,…	838	1128	20051	2.6303	1.65219e-19	4.34721e-21	3.97395e-21
GOTERM_BP_FAT	GO:0030155~regulation of cell adhesion	105	10.2439	4.92063e-23	RIPOR2, IL1RN, CD80, PRDM1, TNF, ZC3H12D, CDH1, SIT1, MYB, TNFSF11, IL12A, CD244A, PLXNC1, BTN1A1, RUNX3, LAX1, FOXP3, UNC13D, RUNX1, CLDN7, ADAM8, TOX, SKAP1, CARD11, IDO1, BLK, BLM, TACSTD2, DTX1, GATA3, RASAL3, PRKCZ, RASGRP1, FUT4, FUT7, TESPA1, BTLA, ICOS, SLAMF1, WNT4, GM5150, CARMIL1, H2-EB2, CARMIL2, EGR3, TNFSF14, CD160, TNFRSF9, FANCA, BTNL2, L1CAM, PLET1, NR4A3, TARM1, CD28, CD27, SERP…	838	863	20051	2.91119	3.24417e-19	8.31713e-21	7.60301e-21
GOTERM_BP_FAT	GO:0002377~immunoglobulin production	56	5.46341	1.46154e-22	IGKV4-51, CD40, IGKV4-50, IGKV4-57-1, IGKV8-18, IGKV4-90, IGKV8-19, SIGLECG, VPREB3, H2-OB, ENPP1, H2-OA, CCR6, IL13RA2, TNFRSF4, IGKV4-86, IGKV4-63, IGKV4-61, IGKV6-29, FOXP3, LAX1, MZB1, IGHE, IGKV4-58, CARD11, IGKV1-133, IGKV4-74, IGKV5-45, NOD2, NUGGC, UNG, IGKV10-95, TBX21, IGKV9-123, IGKV4-69, IGKV3-12, IGKV12-38, IGKV3-10, IGKV7-33, H2-EB2, IGKV8-27, ATAD5, IGKV4-81, IGKV5-37, IGKV4-80, PO…	838	276	20051	4.8548	9.63591e-19	2.40861e-20	2.2018e-20
GOTERM_BP_FAT	GO:0050870~positive regulation of T cell activation	53	5.17073	2.76697e-22	SIRPB1B, SIRPB1A, CD80, PTPN22, TNFRSF13C, CD3E, MYB, H2-OB, TNFSF11, IL12A, CD244A, CCR7, H2-OA, GM9733, HAVCR2, RHOH, PDCD1LG2, FOXP3, RUNX3, RUNX1, IL1A, ZAP70, LCK, IL1B, ADAM8, CARD11, SIRPB1C, BLM, LEF1, GATA3, RASAL3, PRKCZ, RASGRP1, TESPA1, FCHO1, ICOS, IL12RB1, SLAMF1, GM5150, H2-EB2, CARMIL2, EGR3, TNFSF14, CD160, BTNL2, CD4, CD40LG, CD6, CD5, CD28, CD27, IL7R, NFKBID	838	250	20051	5.07257	1.82427e-18	4.44875e-20	4.06678e-20
GOTERM_BP_FAT	GO:0030098~lymphocyte differentiation	74	7.21951	4.69561e-22	ITK, PGLYRP2, FLT3, PTPN22, CD3G, PRDM1, CD3E, CD3D, IKZF3, SPIB, MYB, ENPP1, CTLA4, IL12A, CCR7, H2-OA, CCR6, EOMES, HELLS, CR2, THEMIS, RHOH, FOXP3, RUNX3, RUNX2, RUNX1, IL1A, ZAP70, LCK, CD8A, IL1B, IGHE, ADAM8, TOX, CLEC4E, MS4A1, CARD11, IL9R, BLM, TXK, LEF1, DTX1, GATA3, PRKCZ, RASGRP1, CRACR2A, FUT7, TESPA1, TBX21, CD19, SLAMF8, SLAMF6, KLRC1, WNT4, SLAMF1, NTRK1, CARMIL2, EGR3, BCL11B, CD…	838	482	20051	3.67347	3.09581e-18	7.36987e-20	6.73708e-20
GOTERM_BP_FAT	GO:0002521~leukocyte differentiation	90	8.78049	8.03762e-22	ITK, PGLYRP2, GPR68, FLT3, PTPN22, CD3G, PRDM1, CD3E, TNF, CD3D, IKZF3, SPIB, MYB, ENPP1, TNFSF11, CTLA4, IL12A, CCR7, H2-OA, CCR6, EOMES, HELLS, CR2, TESC, THEMIS, RHOH, GAB3, FOXP3, RUNX3, RUNX2, RUNX1, IL1A, ZAP70, LCK, CD8A, IL1B, IGHE, ADAM8, TOX, CLEC4E, MS4A1, CD101, CARD11, IL9R, BLK, BLM, CEBPE, TXK, LEF1, DTX1, GATA3, PRKCZ, RASGRP1, TRPM2, CRACR2A, FUT7, TESPA1, TBX21, CD19, SLAMF8, SL…	838	689	20051	3.12547	5.2992e-18	1.23219e-19	1.12639e-19
GOTERM_BP_FAT	GO:0007155~cell adhesion	147	14.3415	1.28382e-21	RIPOR2, IL1RN, CD80, ITGA2B, IL1RAP, PRDM1, CELSR1, TNF, ZC3H12D, CDH1, SIT1, MYB, TNFSF11, IL12A, CD244A, PLXNC1, CD96, BTN1A1, RUNX3, LAX1, FOXP3, UNC13D, RUNX1, TIAM1, CLDN4, CLDN3, JAML, CLDN8, CLDN7, CD226, ADAM8, PKP3, CSTDC4, TOX, SKAP1, CARD11, DSC2, IDO1, DSC3, BLK, BLM, TACSTD2, DTX1, GATA3, RASAL3, PRKCZ, RASGRP1, FUT4, STFA2L1, FUT7, TESPA1, BTLA, ICOS, SLAMF1, WNT4, GM5150, CARMIL1, …	838	1543	20051	2.27952	8.46425e-18	1.9234e-19	1.75825e-19
GOTERM_BP_FAT	GO:0030217~T cell differentiation	59	5.7561	2.57087e-21	ITK, FLT3, PTPN22, CD3G, PRDM1, CD3E, CD3D, MYB, ENPP1, CTLA4, IL12A, CCR7, CCR6, EOMES, THEMIS, RHOH, FOXP3, RUNX3, RUNX2, RUNX1, IL1A, ZAP70, LCK, CD8A, IL1B, ADAM8, TOX, CLEC4E, CARD11, BLM, TXK, LEF1, DTX1, GATA3, PRKCZ, RASGRP1, CRACR2A, FUT7, TESPA1, TBX21, SLAMF6, KLRC1, WNT4, CARMIL2, EGR3, BCL11B, CDKN2A, BCL11A, TNFRSF9, FANCA, BATF, CD4, CD28, CD27, TNFSF8, IL7R, NFKBID, IL18R1, GPR18	838	324	20051	4.35711	1.69497e-17	3.76603e-19	3.44268e-19
GOTERM_BP_FAT	GO:0022610~biological adhesion	147	14.3415	2.83239e-21	RIPOR2, IL1RN, CD80, ITGA2B, IL1RAP, PRDM1, CELSR1, TNF, ZC3H12D, CDH1, SIT1, MYB, TNFSF11, IL12A, CD244A, PLXNC1, CD96, BTN1A1, RUNX3, LAX1, FOXP3, UNC13D, RUNX1, TIAM1, CLDN4, CLDN3, JAML, CLDN8, CLDN7, CD226, ADAM8, PKP3, CSTDC4, TOX, SKAP1, CARD11, DSC2, IDO1, DSC3, BLK, BLM, TACSTD2, DTX1, GATA3, RASAL3, PRKCZ, RASGRP1, FUT4, STFA2L1, FUT7, TESPA1, BTLA, ICOS, SLAMF1, WNT4, GM5150, CARMIL1, …	838	1556	20051	2.26048	1.8674e-17	4.05894e-19	3.71044e-19
GOTERM_BP_FAT	GO:0048584~positive regulation of response to stimulus	211	20.5854	7.98519e-21	IGHV3-5, IL1RN, IGHV3-4, GFI1, FZD10, SLA2, GPR174, MYB, TNFSF11, IL12A, UBASH3A, SKP2, DDX11, RUNX3, TIAM1, ARC, CLDN4, DEPDC1B, CLDN3, RRAGB, CD226, SKAP1, IDO1, TXK, SHOX2, IGHV1-66, FPR1, LPAR2, TGFA, GATA3, P2RY10B, MEFV, PRKCZ, TRPM2, CRACR2A, KLRK1, TESPA1, CD19, SLAMF6, KCNN4, SLAMF1, GM10591, CARMIL2, TNFSF14, SH2D1A, L1CAM, MARCO, TREML4, CD28, CD27, GPR18, CD22, ITK, CD40, IGHV5-2, IGH…	838	2689	20051	1.87752	5.26463e-17	1.11996e-18	1.0238e-18
GOTERM_BP_FAT	GO:0042113~B cell activation	73	7.12195	2.44953e-20	IGHV1-5, CD40, IGHV3-5, IGHV3-4, IGHV5-2, FLT3, IGHV1-43, IGHV1-47, TNFRSF13C, SIGLECG, IKZF3, SPIB, MYB, BLNK, TBC1D10C, ENPP1, CTLA4, CCR6, TNFRSF4, IGHV5-6, IGHV7-4, FCRL1, CR2, IGHV5-12, IGHV1-54, IGHV5-15, FOXP3, LAX1, IGHV1-19, BANK1, IGHV15-2, MZB1, IGHE, MS4A1, CARD11, IL9R, BLK, IGHV2-5, IGHV1-20, LEF1, IGHV1-66, CXCR5, NOD2, SAMSN1, RASGRP1, UNG, TBX21, CD19, BTLA, SLAMF8, IGHV8-5, TRDC…	838	503	20051	3.47254	1.61498e-16	3.36403e-18	3.07519e-18
GOTERM_BP_FAT	GO:0070661~leukocyte proliferation	62	6.04878	3.36247e-19	RIPOR2, CD40, FLT3, CD80, PTPN22, TNFRSF13C, CD3E, SIGLECG, IKZF3, ZC3H12D, TNFSF11, CTLA4, IL12A, CD244A, CCR7, TNFRSF4, HAVCR2, HELLS, ARG2, CR2, BTN1A1, PDCD1LG2, FOXP3, GREM1, IL1A, ZAP70, IL1B, MZB1, CARD11, IL9R, IDO1, BLK, BLM, SH2D2A, LEF1, CRIP3, RASAL3, RASGRP1, TSPAN32, CD19, BTLA, STAT4, SLAMF6, IL12RB1, WNT4, SLAMF1, CARMIL2, ATAD5, CDKN2A, TNFRSF9, BTNL2, CD4, CD40LG, CD6, TARM1, CD…	838	392	20051	3.78441	2.21687e-15	4.52355e-17	4.13515e-17
GOTERM_BP_FAT	GO:0007166~cell surface receptor signaling pathway	214	20.878	4.15175e-19	IGHV3-5, IL1RN, VIPR1, IGHV3-4, GFI1, FZD10, SLA2, TNFSF11, IL12A, UBASH3A, IL1R2, IFT80, RUNX3, RUNX2, TIAM1, ARC, DEPDC1B, PADI2, CD226, SKAP1, TXK, SHOX2, IGHV1-66, FPR1, TGFA, GATA3, PRKCZ, KLRK1, TESPA1, CD19, KCNN4, CLCA3A2, SLAMF1, GM10591, CARMIL2, SH2D1A, IL36G, IFNLR1, BTBD11, L1CAM, CD28, CD27, CD22, ITK, CD40, IGHV5-2, IGHV1-43, CD3G, IGHV1-47, TNFRSF13C, BRCA1, CD3E, TRBV13-1, CD3D, …	838	2837	20051	1.80487	2.73725e-15	5.47367e-17	5.00369e-17
GOTERM_BP_FAT	GO:0022402~cell cycle process	120	11.7073	1.02415e-18	RIPOR2, ZWILCH, CCNF, MKI67, TNF, CDC14A, ZC3H12D, CDC20, MTBP, MYB, NUSAP1, PCLAF, RTTN, NEK2, KNTC1, SKP2, BORA, DDX11, KNL1, HASPIN, KNSTRN, CCNE2, DNA2, KIF20A, KIF20B, RNASEH2B, BLM, CDCA2, CDCA5, TGFA, CDCA8, NCAPG, NUGGC, RAD51AP1, CCNB2, DSN1, CCNB1, RACGAP1, FIGNL1, CLSPN, ECT2, RAB11FIP4, WNT4, BARD1, STIL, UBE2C, PLK1, FANCA, CDC7, CDC6, AICDA, NDC80, TPX2, KIF18B, SASS6, CD28, CDK1, T…	838	1218	20051	2.35736	6.75224e-15	1.32377e-16	1.21011e-16
GOTERM_BP_FAT	GO:0002683~negative regulation of immune system process	75	7.31707	2.01376e-18	RIPOR2, PGLYRP2, GPR68, FLT3, CD80, PTPN22, EPX, SLA2, TNF, SIGLECG, ZC3H12D, VPREB3, MYB, GPR171, H2-OB, TBC1D10C, CTLA4, CTSG, H2-OA, UBASH3A, IL13RA2, TNFRSF4, HAVCR2, CD96, ARG2, CR2, FCRL5, PVRIG, BTN1A1, PDCD1LG2, FOXP3, RUNX3, LAX1, RUNX1, GREM1, FGR, BANK1, OAS3, PADI2, TLR6, IDO1, BLK, DTX1, NLRC3, OAS1C, NOD2, CST7, SAMSN1, TSPAN32, CNR2, TBX21, CXCR2, BTLA, SLAMF8, STAP1, KLRC1, TIGIT,…	838	570	20051	3.14832	1.32767e-14	2.5234e-16	2.30674e-16
GOTERM_BP_FAT	GO:0032609~interferon-gamma production	36	3.5122	2.02883e-18	ITK, PGLYRP2, FLT3, TXK, PTPN22, NOD2, TNFRSF13C, GATA3, CD3E, RASGRP1, TNF, IL18RAP, KLRK1, ENPP1, SLAMF6, IL12A, CD244A, IL12RB1, SLAMF1, HAVCR2, EOMES, CD96, CARMIL2, CD160, PDCD1LG2, FOXP3, RUNX3, RUNX1, CD40LG, IL1B, LTA, F2RL1, CD27, CD226, ULBP1, IL18R1	838	137	20051	6.28744	1.3376e-14	2.5234e-16	2.30674e-16
GOTERM_BP_FAT	GO:0046651~lymphocyte proliferation	58	5.65854	2.24015e-18	RIPOR2, CD40, FLT3, CD80, PTPN22, TNFRSF13C, CD3E, SIGLECG, IKZF3, ZC3H12D, CTLA4, IL12A, CD244A, CCR7, TNFRSF4, HAVCR2, HELLS, ARG2, CR2, BTN1A1, PDCD1LG2, FOXP3, IL1A, ZAP70, IL1B, MZB1, CARD11, IL9R, IDO1, BLK, BLM, SH2D2A, LEF1, CRIP3, RASAL3, RASGRP1, TSPAN32, CD19, BTLA, SLAMF6, IL12RB1, WNT4, SLAMF1, CARMIL2, ATAD5, CDKN2A, TNFRSF9, BTNL2, CD4, CD40LG, CD6, TARM1, CD28, CD27, CLEC2I, IL7R,…	838	360	20051	3.85494	1.47693e-14	2.73464e-16	2.49984e-16
GOTERM_BP_FAT	GO:0032943~mononuclear cell proliferation	58	5.65854	3.31774e-18	RIPOR2, CD40, FLT3, CD80, PTPN22, TNFRSF13C, CD3E, SIGLECG, IKZF3, ZC3H12D, CTLA4, IL12A, CD244A, CCR7, TNFRSF4, HAVCR2, HELLS, ARG2, CR2, BTN1A1, PDCD1LG2, FOXP3, IL1A, ZAP70, IL1B, MZB1, CARD11, IL9R, IDO1, BLK, BLM, SH2D2A, LEF1, CRIP3, RASAL3, RASGRP1, TSPAN32, CD19, BTLA, SLAMF6, IL12RB1, WNT4, SLAMF1, CARMIL2, ATAD5, CDKN2A, TNFRSF9, BTNL2, CD4, CD40LG, CD6, TARM1, CD28, CD27, CLEC2I, IL7R,…	838	363	20051	3.82308	2.18739e-14	3.97646e-16	3.63504e-16
GOTERM_BP_FAT	GO:1903047~mitotic cell cycle process	88	8.58537	4.45244e-18	RIPOR2, ZWILCH, CCNF, BRCA1, KIF11, FOXM1, TNF, CDC14A, ZC3H12D, CDC20, MTBP, NUF2, MYB, PBK, NUSAP1, MYBL2, NEK2, KNTC1, SPDL1, SKP2, POLE, DLGAP5, CEP55, BORA, CKAP2, KIF23, KIF22, HASPIN, CCSAP, KNSTRN, KIF4, CCNA2, IL1A, DBF4, ESPL1, SAPCD2, CCNE2, KIFC1, IL1B, BIRC5, KIF2C, KIF20A, DNA2, KIF20B, RNASEH2B, BLM, CDCA5, TGFA, CDCA8, NCAPG, CENPA, NSL1, AURKB, CCNB2, CCNB1, DSN1, RACGAP1, RBBP8,…	838	757	20051	2.7815	2.93549e-14	5.24116e-16	4.79114e-16
GOTERM_BP_FAT	GO:0001819~positive regulation of cytokine production	71	6.92683	2.52996e-17	ITK, CD40, FLT3, CGAS, PTPN22, BRCA1, IL1RAP, TNFRSF13C, EPX, CD3E, TNF, PANX1, FCNB, CLEC5A, TNFRSF8, IL12A, CD244A, CCR7, OASL1, HAVCR2, FOXP3, ADRA2A, IL17RB, RUNX1, FGR, IL1A, IL1B, OAS3, LTA, CHIL1, CD226, ADAM8, TLR6, CLEC4E, CARD11, IDO1, TXK, NLRC4, OAS1C, NOD2, GATA3, MEFV, PRKCZ, RASGRP1, KLRK1, TBX21, SLAMF6, IL12RB1, TIGIT, SLAMF1, IFI206, CARMIL2, CD160, OSM, IL36G, PRG3, BTNL2, POU2…	838	543	20051	3.1286	1.668e-13	2.92588e-15	2.67466e-15
GOTERM_BP_FAT	GO:0045785~positive regulation of cell adhesion	69	6.73171	2.86465e-17	SIRPB1B, SIRPB1A, CD80, PTPN22, TNFRSF13C, CD3E, TNF, EPB41L4B, CDH1, MYB, H2-OB, TNFSF11, IL12A, CD244A, CCR7, CTSG, H2-OA, GM9733, HAVCR2, ITGA2, FGG, RHOH, PDCD1LG2, FOXP3, RUNX3, UNC13D, RUNX1, IL1A, ZAP70, LCK, IL1B, ADAM8, SKAP1, CARD11, CHST2, SIRPB1C, BLM, LEF1, GATA3, RASAL3, PRKCZ, RASGRP1, FUT4, FUT7, TESPA1, FCHO1, SPP1, ICOS, IL12RB1, WNT4, SLAMF1, GM5150, H2-EB2, CARMIL1, CARMIL2, E…	838	518	20051	3.18721	1.88866e-13	3.25417e-15	2.97476e-15
GOTERM_BP_FAT	GO:0051301~cell division	78	7.60976	2.91256e-17	TOP2A, ERCC6L, ZWILCH, CCNF, KIF11, CDC14A, CDC20, NUF2, MYB, NUSAP1, NEK2, KNTC1, SPDL1, CEP55, HELLS, BORA, CKAP2, KIF23, KNL1, PIMREG, CCSAP, KNSTRN, KIF4, CCNA2, ASPM, IL1A, SAPCD2, CCNE2, KIFC1, IL1B, BIRC5, KIF2C, KIF20A, KIF20B, BLM, CDCA2, CDCA3, RGS14, CDCA5, LEF1, MRGPRB1, CXCR5, TGFA, CDCA8, NCAPG, CENPA, NSL1, AURKB, CCNB2, CCNB1, DSN1, RACGAP1, HAUS8, RBBP8, EVI2, ECT2, BUB1, RAB11FI…	838	639	20051	2.92069	1.92025e-13	3.25417e-15	2.97476e-15
GOTERM_BP_FAT	GO:0001816~cytokine production	93	9.07317	3.24777e-17	ITK, CD40, PGLYRP2, FLT3, IL5RA, CGAS, PTPN22, BRCA1, IL1RAP, TREM3, TNFRSF13C, EPX, CD3E, TNF, PANX1, FCNB, IL18RAP, CLEC5A, ENPP1, TNFRSF8, IL12A, CD244A, CCR7, FFAR1, TNFRSF4, OASL1, HAVCR2, EOMES, CD96, ARG2, IL1R2, BTN1A1, PDCD1LG2, FOXP3, RUNX3, ADRA2A, IL17RB, RUNX1, FGR, IL1A, BANK1, IL1B, OAS3, LTA, CHIL1, CD226, ADAM8, TLR6, CLEC4E, CARD11, IDO1, CX3CR1, TXK, LEF1, NLRC3, NLRC4, OAS1C, …	838	855	20051	2.60261	2.14125e-13	3.56822e-15	3.26184e-15
GOTERM_BP_FAT	GO:0000278~mitotic cell cycle	96	9.36585	4.75786e-17	FOXA1, RIPOR2, ZWILCH, CCNF, BRCA1, KIF11, FOXM1, MKI67, TNF, CDC14A, ZC3H12D, CDC20, MTBP, NUF2, MYB, PBK, NUSAP1, MYBL2, NEK2, KNTC1, SPDL1, SKP2, POLE, MYBL1, DLGAP5, CEP55, WDHD1, BORA, CKAP2, KIF23, KIF22, HASPIN, CCSAP, KNSTRN, KIF4, CCNA2, IL1A, DBF4, ESPL1, SAPCD2, CCNE2, KIFC1, IL1B, BIRC5, KIF2C, KIF20A, DNA2, KIF20B, RNASEH2B, BLM, CDCA2, RGS14, CDCA5, TGFA, CDCA8, NCAPG, CENPA, NSL1, …	838	905	20051	2.53813	3.13686e-13	5.14161e-15	4.70014e-15
GOTERM_BP_FAT	GO:0007067~mitotic nuclear division	54	5.26829	6.19599e-17	RIPOR2, ZWILCH, KIF11, TNF, CDC14A, CDC20, MTBP, NUF2, NUSAP1, MYBL2, NEK2, KNTC1, SPDL1, DLGAP5, BORA, KIF23, KIF22, HASPIN, CCSAP, KNSTRN, KIF4, IL1A, ESPL1, KIFC1, IL1B, BIRC5, KIF2C, CDCA5, TGFA, CDCA8, NCAPG, NSL1, AURKB, CCNB1, DSN1, RACGAP1, BUB1, STIL, SPAG5, UBE2C, PLK1, CDC6, NDC80, TPX2, CENPE, KIF18B, CENPH, PRC1, CD28, SASS6, TACC3, TRIP13, SPC24, SPC25	838	339	20051	3.81141	7.3197e-13	6.56263e-15	5.99915e-15
GOTERM_BP_FAT	GO:0010564~regulation of cell cycle process	82	8	6.30599e-17	RIPOR2, ZWILCH, CCNF, BRCA1, KIF11, MKI67, TNF, CDC14A, ZC3H12D, CDC20, MTBP, NUF2, PBK, NUSAP1, NEK2, KNTC1, SPDL1, RMI2, BORA, CEP295, DDX11, KIF23, HASPIN, CCSAP, KNSTRN, IL1A, DBF4, KIFC1, IL1B, BIRC5, KIF20A, KIF20B, RNASEH2B, BLM, CDCA2, CDCA5, LEF1, MRGPRB1, CXCR5, TGFA, CDCA8, NCAPG, NUGGC, AURKB, RAD51AP1, CCNB1, RACGAP1, RBBP8, CLSPN, ECT2, BUB1, RAB11FIP4, WNT4, E2F8, BARD1, MBD4, STIL…	838	704	20051	2.78698	7.3197e-13	6.56263e-15	5.99915e-15
GOTERM_BP_FAT	GO:0002520~immune system development	114	11.122	6.37148e-17	PGLYRP2, GPR68, GFI1, PRDM1, TNF, IKZF3, CXCL15, SPIB, CLEC5A, MYB, GPR171, ENPP1, TNFSF11, IL12A, HERC6, EOMES, THEMIS, RUNX3, FOXP3, RUNX2, RUNX1, MELK, CD8A, ADAM8, CLEC4E, TOX, CD101, CARD11, IDO1, BLK, BLM, TXK, DTX1, GATA3, PRKCZ, RASGRP1, NUGGC, TRPM2, CCNB2, CRACR2A, FUT7, TESPA1, CD19, SLAMF8, STAP1, EVI2, SLAMF6, KLRC1, ICOS, CD300LF, SLAMF1, WNT4, CARMIL2, EGR3, BCL11B, BCL11A, TNFRSF9…	838	1189	20051	2.29411	7.3197e-13	6.56263e-15	5.99915e-15
GOTERM_BP_FAT	GO:0000280~nuclear division	69	6.73171	8.49574e-17	TOP2A, RIPOR2, ZWILCH, KIF11, MKI67, TNF, CDC14A, CDC20, MTBP, NUF2, NUSAP1, MYBL2, NEK2, KNTC1, SPDL1, MYBL1, DLGAP5, BORA, KIF23, KIF22, HASPIN, CCSAP, KNSTRN, KIF4, ASPM, IL1A, ESPL1, CCNE2, KIFC1, IL1B, BIRC5, KIF2C, KIF20B, CDCA2, CDCA5, TGFA, CDCA8, NCAPG, NSL1, AURKB, RAD51AP1, CCNB2, CCNB1, DSN1, RACGAP1, FIGNL1, BUB1, WNT4, STIL, SPAG5, UBE2C, PLK1, FANCA, OSM, CDC6, NDC80, TPX2, CENPE, …	838	529	20051	3.12094	7.3197e-13	8.61599e-15	7.8762e-15
GOTERM_BP_FAT	GO:0001817~regulation of cytokine production	89	8.68293	2.91922e-16	ITK, CD40, PGLYRP2, FLT3, IL5RA, CGAS, PTPN22, BRCA1, IL1RAP, TNFRSF13C, EPX, CD3E, TNF, PANX1, FCNB, CLEC5A, TNFRSF8, IL12A, CD244A, CCR7, UBASH3A, FFAR1, TNFRSF4, OASL1, ZFP287, HAVCR2, CD96, ARG2, IL1R2, BTN1A1, PDCD1LG2, FOXP3, ADRA2A, IL17RB, RUNX1, FGR, IL1A, BANK1, IL1B, OAS3, LTA, CHIL1, CD226, ADAM8, TLR6, CLEC4E, CARD11, IDO1, CX3CR1, TXK, LEF1, NLRC3, NLRC4, OAS1C, NOD2, GATA3, MEFV, P…	838	819	20051	2.60015	2.19591e-12	2.91569e-14	2.66534e-14
GOTERM_BP_FAT	GO:0050864~regulation of B cell activation	52	5.07317	5.55079e-16	IGHV1-5, CD40, IGHV3-5, IGHV3-4, IGHV5-2, FLT3, IGHV1-43, IGHV1-47, TNFRSF13C, SIGLECG, IKZF3, TBC1D10C, CTLA4, TNFRSF4, IGHV5-6, IGHV7-4, IGHV5-12, IGHV1-54, IGHV5-15, FOXP3, IGHV1-19, BANK1, IGHV15-2, MZB1, IGHE, CARD11, BLK, IGHV2-5, IGHV1-20, IGHV1-66, NOD2, SAMSN1, TBX21, CD19, BTLA, SLAMF8, IGHV8-5, TRDC, IGHV2-9, IGHV1-62-2, IGHV1-62-3, ATAD5, CDKN2A, IGHV1-31, IGHV1-34, IGHV1-37, IGHV14-1…	838	331	20051	3.75896	3.65985e-12	5.46131e-14	4.99239e-14
KEGG_PATHWAY	mmu04060:Cytokine-cytokine receptor interaction	47	4.58537	6.23361e-16	CX3CR1, CD40, IL1RN, CXCR5, IL5RA, TNFRSF13C, IL1RAP, TNF, CXCL15, IL18RAP, CXCR2, IL21R, CCR8, TNFRSF17, TNFRSF8, TNFSF11, IL12A, CCR7, CCR6, IL12RB1, IL13RA2, CCL17, TNFRSF4, RELT, CCR4, CCR3, GM10591, CCL22, XCR1, TNFSF14, IL1R2, TNFRSF9, OSM, IL36G, IFNLR1, IL17RB, IL1A, CD4, CD40LG, IL1B, LTA, ACKR4, CD27, TNFSF8, IL7R, IL9R, IL18R1	363	292	8998	3.98983	1.81855e-13	1.70801e-13	1.54594e-13
GOTERM_BP_FAT	GO:0002697~regulation of immune effector process	68	6.63415	7.10192e-16	CD40, PGLYRP2, CGAS, PTPN22, EPX, TNF, SIGLECG, PANX1, VPREB3, KLRB1C, IL18RAP, KLRB1F, MYB, IL12A, CD244A, CCR7, IL13RA2, TNFRSF4, KLRI1, OASL1, HAVCR2, CD96, CR2, IFIT1BL1, FOXP3, UNC13D, FGR, IL1B, MZB1, LTA, CD226, FCER2A, DNASE1L3, BLK, H2-M2, H2-Q2, NOD2, GATA3, PRKCZ, RASGRP1, TSPAN32, FUT7, KLRK1, TBX21, SLAMF8, SLAMF6, KLRC1, IL12RB1, SLAMF1, ATAD5, CD160, SH2D1A, IFNLR1, SCIMP, ITGB2L, …	838	534	20051	3.04691	4.39182e-12	6.88469e-14	6.29356e-14
GOTERM_BP_FAT	GO:0000070~mitotic sister chromatid segregation	40	3.90244	9.13827e-16	ZWILCH, CDCA5, CDCA8, NCAPG, KIF11, NSL1, AURKB, CDC20, MTBP, CCNB1, DSN1, RACGAP1, NUF2, NUSAP1, NEK2, KNTC1, SPDL1, BUB1, STIL, SPAG5, UBE2C, PLK1, KIF23, KIF22, CDC6, HASPIN, KNSTRN, NDC80, KIF4, CENPE, KIF18B, ESPL1, KIFC1, PRC1, TACC3, BIRC5, KIF2C, TRIP13, SPC24, SPC25	838	203	20051	4.71472	5.85576e-12	8.73036e-14	7.98076e-14
GOTERM_BP_FAT	GO:0016064~immunoglobulin mediated immune response	53	5.17073	9.63113e-16	IGHV1-5, CD40, IGHV3-5, IGHV3-4, IGHV5-2, IGHV1-43, IGHV1-47, TNF, H2-OB, ENPP1, H2-OA, CCR6, IL13RA2, IGHV5-6, IGHV7-4, CR2, IGHV5-12, IGHV1-54, IGHV5-15, FOXP3, IGHV1-19, IGHV15-2, LTA, IGHE, CD226, FCER2A, IL9R, IGHV2-5, IGHV1-20, IGHV1-66, NOD2, UNG, TBX21, CD19, IL21R, IGHV8-5, TRDC, IGHV2-9, IGHV1-62-2, H2-EB2, IGHV1-62-3, ATAD5, IGHV1-31, IGHV1-34, POU2F2, IGHV1-37, AICDA, BATF, IGHV14-1, …	838	347	20051	3.65459	6.58773e-12	9.06977e-14	8.29103e-14
GOTERM_BP_FAT	GO:0032649~regulation of interferon-gamma production	32	3.12195	1.01622e-15	PGLYRP2, FLT3, TXK, PTPN22, NOD2, TNFRSF13C, GATA3, CD3E, RASGRP1, TNF, KLRK1, SLAMF6, IL12A, CCR7, CD244A, IL12RB1, SLAMF1, HAVCR2, CD96, CARMIL2, CD160, PDCD1LG2, FOXP3, RUNX1, CD40LG, IL1B, LTA, F2RL1, CD27, CD226, ULBP1, IL18R1	838	128	20051	5.9818	6.58773e-12	9.43512e-14	8.625e-14
GOTERM_BP_FAT	GO:0019724~B cell mediated immunity	53	5.17073	1.79564e-15	IGHV1-5, CD40, IGHV3-5, IGHV3-4, IGHV5-2, IGHV1-43, IGHV1-47, TNF, H2-OB, ENPP1, H2-OA, CCR6, IL13RA2, IGHV5-6, IGHV7-4, CR2, IGHV5-12, IGHV1-54, IGHV5-15, FOXP3, IGHV1-19, IGHV15-2, LTA, IGHE, CD226, FCER2A, IL9R, IGHV2-5, IGHV1-20, IGHV1-66, NOD2, UNG, TBX21, CD19, IL21R, IGHV8-5, TRDC, IGHV2-9, IGHV1-62-2, H2-EB2, IGHV1-62-3, ATAD5, IGHV1-31, IGHV1-34, POU2F2, IGHV1-37, AICDA, BATF, IGHV14-1, …	838	352	20051	3.60268	1.17115e-11	1.64401e-13	1.50285e-13
KEGG_PATHWAY	mmu04640:Hematopoietic cell lineage	27	2.63415	1.95867e-15	FLT3, ITGA2B, IL5RA, CD3G, CD3E, CD3D, TNF, CD19, H2-OB, H2-OA, H2-EB2, CR2, ITGA2, IL1R2, CD8B1, DNTT, IL1A, CD4, CD5, CD8A, IL1B, CD7, FCER2A, IL7R, MS4A1, CD22, IL9R	363	94	8998	7.11992	5.45564e-13	2.68338e-13	2.42875e-13
GOTERM_BP_FAT	GO:0000819~sister chromatid segregation	42	4.09756	2.31549e-15	TOP2A, ZWILCH, CDCA5, CDCA8, NCAPG, KIF11, NSL1, AURKB, CDC20, MTBP, CCNB1, DSN1, RACGAP1, NUF2, NUSAP1, NEK2, KNTC1, SPDL1, BUB1, STIL, SPAG5, UBE2C, DDX11, PLK1, KIF23, KIF22, CDC6, HASPIN, KNSTRN, NDC80, KIF4, CENPE, KIF18B, ESPL1, KIFC1, PRC1, TACC3, BIRC5, KIF2C, TRIP13, SPC24, SPC25	838	229	20051	4.3884	1.53714e-11	2.09092e-13	1.91139e-13
GOTERM_BP_FAT	GO:0007059~chromosome segregation	55	5.36585	2.70002e-15	TOP2A, ZWILCH, BRCA1, KIF11, CDC20, MTBP, NUF2, NUSAP1, NEK2, KNTC1, SPDL1, DLGAP5, RMI2, DDX11, KIF23, KNL1, KIF22, HASPIN, KNSTRN, KIF4, ESPL1, CCNE2, KIFC1, BIRC5, KIF2C, CDCA2, RGS14, CDCA5, CDCA8, NCAPG, NSL1, AURKB, CCNB1, DSN1, RACGAP1, ECT2, BUB1, STIL, SPAG5, UBE2C, PLK1, CDC6, NDC80, CENPE, CENPF, KIF18B, CENPH, PRC1, TACC3, CENPN, TRIP13, CENPQ, SPC24, SPC25, CENPS	838	380	20051	3.46315	1.75673e-11	2.4052e-13	2.19869e-13
GOTERM_BP_FAT	GO:0051726~regulation of cell cycle	107	10.439	3.53287e-15	FOXA1, RIPOR2, ZWILCH, CCNF, MKI67, TNF, CDC14A, TGM1, ZC3H12D, CDC20, MTBP, NUSAP1, PCLAF, IL12A, NEK2, KNTC1, SKP2, BORA, DDX11, HASPIN, RUNX3, KNSTRN, CCNE2, DNA2, KIF20A, KIF20B, PRR11, RNASEH2B, BLM, CDCA2, CDCA5, TGFA, CDCA8, NCAPG, GATA3, PRDM11, NUGGC, RAD51AP1, CCNB2, CCNB1, RACGAP1, FIGNL1, EVI2, CLSPN, ECT2, RAB11FIP4, WNT4, BARD1, STIL, UBE2C, PLK1, CDC7, CDC6, AICDA, NDC80, TPX2, NR4…	838	1136	20051	2.25371	2.3423e-11	3.10516e-13	2.83854e-13
GOTERM_BP_FAT	GO:0048285~organelle fission	70	6.82927	3.73829e-15	TOP2A, RIPOR2, ZWILCH, KIF11, MKI67, TNF, CDC14A, CDC20, MTBP, NUF2, NUSAP1, MYBL2, NEK2, KNTC1, SPDL1, MYBL1, DLGAP5, BORA, KIF23, KIF22, HASPIN, CCSAP, KNSTRN, KIF4, ASPM, IL1A, ESPL1, CCNE2, KIFC1, IL1B, BIRC5, KIF2C, MTFR2, KIF20B, CDCA2, CDCA5, TGFA, CDCA8, NCAPG, NSL1, AURKB, RAD51AP1, CCNB2, CCNB1, DSN1, RACGAP1, FIGNL1, BUB1, WNT4, STIL, SPAG5, UBE2C, PLK1, FANCA, OSM, CDC6, NDC80, TPX2, …	838	580	20051	2.88777	2.4887e-11	3.24247e-13	2.96407e-13
GOTERM_BP_FAT	GO:0050670~regulation of lymphocyte proliferation	44	4.29268	6.75046e-15	BLK, RIPOR2, BLM, CD40, CD80, PTPN22, TNFRSF13C, CD3E, RASAL3, SIGLECG, IKZF3, TSPAN32, ZC3H12D, BTLA, CTLA4, IL12A, CCR7, CD244A, IL12RB1, TNFRSF4, SLAMF1, HAVCR2, CARMIL2, ARG2, ATAD5, CDKN2A, BTN1A1, TNFRSF9, PDCD1LG2, BTNL2, FOXP3, ZAP70, IL1A, CD4, CD40LG, CD6, IL1B, TARM1, CD28, MZB1, CLEC2I, CD22, CARD11, IDO1	838	258	20051	4.08061	4.46502e-11	5.76879e-13	5.27347e-13
GOTERM_BP_FAT	GO:0046631~alpha-beta T cell activation	38	3.70732	6.82593e-15	ITK, BLM, TXK, CD80, LEF1, PTPN22, PRDM1, GATA3, CD3E, RASAL3, PRKCZ, CRACR2A, FUT7, TBX21, MYB, BTLA, SLAMF6, IL12A, CCR7, CD244A, IL12RB1, EOMES, ARG2, BCL11B, CD160, FOXP3, RUNX3, BATF, RUNX1, ZAP70, TARM1, CD28, TNFSF8, TOX, NFKBID, GPR18, CARD11, IL18R1	838	194	20051	4.68677	4.46502e-11	5.76879e-13	5.27347e-13
GOTERM_BP_FAT	GO:0032944~regulation of mononuclear cell proliferation	44	4.29268	1.36367e-14	BLK, RIPOR2, BLM, CD40, CD80, PTPN22, TNFRSF13C, CD3E, RASAL3, SIGLECG, IKZF3, TSPAN32, ZC3H12D, BTLA, CTLA4, IL12A, CCR7, CD244A, IL12RB1, TNFRSF4, SLAMF1, HAVCR2, CARMIL2, ARG2, ATAD5, CDKN2A, BTN1A1, TNFRSF9, PDCD1LG2, BTNL2, FOXP3, ZAP70, IL1A, CD4, CD40LG, CD6, IL1B, TARM1, CD28, MZB1, CLEC2I, CD22, CARD11, IDO1	838	263	20051	4.00303	9.00323e-11	1.13789e-12	1.04019e-12
GOTERM_BP_FAT	GO:0007049~cell cycle	142	13.8537	2.30402e-14	FOXA1, RIPOR2, ERCC6L, ZWILCH, CCNF, MKI67, TNF, CDC14A, TGM1, XLR4A, ZC3H12D, CDC20, MTBP, XLR4C, MYB, XLR4B, NUSAP1, PCLAF, RTTN, NEK2, KNTC1, SKP2, WDHD1, BORA, DDX11, KNL1, PIMREG, HASPIN, RUNX3, KNSTRN, MELK, CCNE2, DNA2, KIF20A, KIF20B, RNASEH2B, BLM, CDCA2, CDCA3, CDCA5, TGFA, CDCA8, NCAPG, GATA3, NUGGC, RAD51AP1, CCNB2, DSN1, CCNB1, RACGAP1, FIGNL1, CLSPN, ECT2, RAB11FIP4, WNT4, BARD1, ST…	838	1765	20051	1.92502	1.5225e-10	1.89851e-12	1.73551e-12
GOTERM_BP_FAT	GO:0070663~regulation of leukocyte proliferation	45	4.39024	2.90909e-14	BLK, RIPOR2, BLM, CD40, CD80, PTPN22, TNFRSF13C, CD3E, RASAL3, SIGLECG, IKZF3, TSPAN32, ZC3H12D, BTLA, CTLA4, IL12A, CCR7, CD244A, IL12RB1, TNFRSF4, SLAMF1, HAVCR2, CARMIL2, ARG2, ATAD5, CDKN2A, BTN1A1, TNFRSF9, PDCD1LG2, BTNL2, FOXP3, GREM1, ZAP70, IL1A, CD4, CD40LG, CD6, IL1B, TARM1, CD28, MZB1, CLEC2I, CD22, CARD11, IDO1	838	280	20051	3.84544	1.91776e-10	2.3675e-12	2.16422e-12
GOTERM_BP_FAT	GO:0048534~hematopoietic or lymphoid organ development	104	10.1463	3.51706e-14	PGLYRP2, GPR68, GFI1, PRDM1, TNF, IKZF3, CXCL15, SPIB, CLEC5A, MYB, GPR171, ENPP1, TNFSF11, IL12A, HERC6, EOMES, THEMIS, RUNX3, FOXP3, RUNX2, RUNX1, MELK, CD8A, ADAM8, CLEC4E, TOX, CD101, CARD11, BLK, BLM, TXK, DTX1, GATA3, PRKCZ, RASGRP1, TRPM2, CCNB2, CRACR2A, FUT7, TESPA1, CD19, SLAMF8, STAP1, EVI2, SLAMF6, KLRC1, CD300LF, SLAMF1, WNT4, CARMIL2, EGR3, BCL11B, BCL11A, TNFRSF9, FANCA, POU2F2, CD…	838	1127	20051	2.20801	2.32035e-10	2.82737e-12	2.58461e-12
GOTERM_BP_FAT	GO:0031347~regulation of defense response	82	8	6.51639e-14	CD40, PGLYRP2, IFI213, GFI1, IFI214, CGAS, PTPN22, TREM3, TNF, FCNB, KLRB1C, IL18RAP, KLRB1F, PBK, TNFSF11, IL12A, CCR7, GGT1, KLRI1, OASL1, HAVCR2, CD96, TASL, ARG2, CR2, ITGA2, IL1R2, IFIT1BL1, FOXP3, IL17RB, FGR, IL1B, OAS3, TLR12, LTA, TLR11, CD226, ADAM8, TLR6, CLEC4E, GM6377, DNASE1L3, TLR13, IDO1, CX3CR1, TXK, NLRC3, NLRC4, OAS1C, NOD2, GATA3, MEFV, LRP8, RASGRP1, COCH, TSPAN32, NT5E, FUT7…	838	791	20051	2.48044	4.29666e-10	5.17542e-12	4.73105e-12
GOTERM_BP_FAT	GO:0042098~T cell proliferation	40	3.90244	7.00933e-14	RIPOR2, BLM, CD80, SH2D2A, PTPN22, CRIP3, TNFRSF13C, CD3E, RASAL3, RASGRP1, TSPAN32, ZC3H12D, BTLA, CTLA4, IL12A, CCR7, CD244A, IL12RB1, TNFRSF4, WNT4, SLAMF1, HAVCR2, CARMIL2, ARG2, CDKN2A, BTN1A1, TNFRSF9, PDCD1LG2, BTNL2, FOXP3, ZAP70, IL1A, CD4, CD40LG, CD6, IL1B, TARM1, CD28, CARD11, IDO1	838	230	20051	4.16125	4.61873e-10	5.50065e-12	5.02836e-12
GOTERM_BP_FAT	GO:0032729~positive regulation of interferon-gamma production	25	2.43902	7.98479e-14	FLT3, TXK, PTPN22, TNFRSF13C, CD3E, RASGRP1, TNF, KLRK1, SLAMF6, IL12A, CD244A, IL12RB1, SLAMF1, HAVCR2, CARMIL2, CD160, RUNX1, CD40LG, IL1B, LTA, F2RL1, CD27, CD226, ULBP1, IL18R1	838	87	20051	6.87563	5.26286e-10	6.14296e-12	5.61552e-12
GOTERM_BP_FAT	GO:0051983~regulation of chromosome segregation	33	3.21951	8.01418e-14	CDCA2, ZWILCH, CDCA5, CDCA8, NCAPG, MKI67, AURKB, CDC20, MTBP, CCNB1, RACGAP1, NUF2, NEK2, KNTC1, SPDL1, ECT2, BUB1, RMI2, STIL, SPAG5, UBE2C, DDX11, PLK1, CDC6, KNSTRN, NDC80, CENPE, TACC3, BIRC5, KIF2C, TRIP13, SPC24, SPC25	838	158	20051	4.99745	5.28482e-10	6.14296e-12	5.61552e-12
GOTERM_BP_FAT	GO:0030097~hemopoiesis	100	9.7561	8.27025e-14	PGLYRP2, GPR68, GFI1, PRDM1, TNF, IKZF3, CXCL15, SPIB, CLEC5A, MYB, GPR171, ENPP1, TNFSF11, IL12A, HERC6, EOMES, THEMIS, RUNX3, FOXP3, RUNX2, RUNX1, MELK, CD8A, ADAM8, CLEC4E, TOX, CD101, CARD11, BLK, BLM, TXK, DTX1, GATA3, PRKCZ, RASGRP1, TRPM2, CRACR2A, FUT7, TESPA1, CD19, SLAMF8, STAP1, EVI2, SLAMF6, KLRC1, CD300LF, SLAMF1, WNT4, CARMIL2, EGR3, BCL11B, BCL11A, TNFRSF9, FANCA, POU2F2, CD28, CD2…	838	1077	20051	2.22165	5.45318e-10	6.26637e-12	5.72833e-12
GOTERM_BP_FAT	GO:0098813~nuclear chromosome segregation	47	4.58537	1.05541e-13	TOP2A, ZWILCH, CDCA5, CDCA8, NCAPG, KIF11, NSL1, AURKB, CDC20, MTBP, CCNB1, DSN1, RACGAP1, NUF2, NUSAP1, NEK2, KNTC1, SPDL1, BUB1, STIL, SPAG5, UBE2C, DDX11, PLK1, KIF23, KIF22, CDC6, KNL1, HASPIN, KNSTRN, NDC80, KIF4, CENPE, CENPF, KIF18B, ESPL1, CCNE2, KIFC1, PRC1, TACC3, BIRC5, KIF2C, TRIP13, CENPQ, SPC24, SPC25, CENPS	838	314	20051	3.58146	6.96104e-10	7.90599e-12	7.22716e-12
GOTERM_BP_FAT	GO:0007088~regulation of mitotic nuclear division	39	3.80488	1.0824e-13	RIPOR2, CDCA2, ZWILCH, CDCA5, TGFA, CDCA8, KIF11, MKI67, TNF, AURKB, CDC14A, CDC20, MTBP, CCNB1, NUF2, NUSAP1, NEK2, KNTC1, SPDL1, BUB1, STIL, BORA, UBE2C, PLK1, CDC6, CCSAP, NDC80, CENPE, IL1A, TPX2, IL1B, CD28, SASS6, TACC3, BIRC5, TRIP13, KIF20B, SPC24, SPC25	838	222	20051	4.20343	7.13671e-10	8.01708e-12	7.32872e-12
GOTERM_BP_FAT	GO:0009607~response to biotic stimulus	132	12.878	1.75607e-13	IGHV3-5, IGHV3-4, PGLYRP2, CD80, GFI1, PRF1, EPX, MPO, TNF, IKZF3, CXCL15, RGS1, ENPP1, IL12A, GGT1, SKP2, HERC6, IGHV7-4, CD96, GBP8, GAS2L3, IFIT1BL1, FOXP3, UNC13D, IGHV1-19, NAIP6, CD8A, CD226, CLEC4E, IDO1, IGHV1-66, GATA3, NUGGC, SERPINA3F, KLRK1, SLAMF8, PMAIP1, STAP1, IGHV8-5, TRDC, WFDC18, CD160, IFI44, IL36G, IFNLR1, POU2F2, AICDA, DCLK1, IGHV14-1, TREML4, TNFSF8, IL7R, HAMP, ULBP1, IGH…	838	1633	20051	1.9341	1.15798e-09	1.28622e-11	1.17579e-11
GOTERM_BP_FAT	GO:0051783~regulation of nuclear division	42	4.09756	1.97349e-13	RIPOR2, CDCA2, ZWILCH, CDCA5, TGFA, CDCA8, KIF11, MKI67, TNF, AURKB, CDC14A, CDC20, RAD51AP1, MTBP, CCNB1, NUF2, NUSAP1, NEK2, KNTC1, SPDL1, BUB1, WNT4, STIL, BORA, UBE2C, PLK1, OSM, CDC6, CCSAP, NDC80, CENPE, IL1A, TPX2, IL1B, CD28, SASS6, TACC3, BIRC5, TRIP13, KIF20B, SPC24, SPC25	838	260	20051	3.86516	1.30144e-09	1.42958e-11	1.30684e-11
GOTERM_BP_FAT	GO:0051707~response to other organism	128	12.4878	2.34629e-13	IGHV3-5, IGHV3-4, PGLYRP2, CD80, GFI1, PRF1, EPX, MPO, TNF, IKZF3, CXCL15, RGS1, ENPP1, IL12A, GGT1, SKP2, HERC6, IGHV7-4, CD96, GBP8, GAS2L3, IFIT1BL1, FOXP3, UNC13D, IGHV1-19, NAIP6, CD8A, CLEC4E, IDO1, IGHV1-66, GATA3, NUGGC, SERPINA3F, KLRK1, SLAMF8, PMAIP1, STAP1, IGHV8-5, TRDC, WFDC18, CD160, IFI44, IL36G, IFNLR1, POU2F2, AICDA, DCLK1, IGHV14-1, TREML4, TNFSF8, IL7R, HAMP, IGHV1-5, CD40, IG…	838	1570	20051	1.95075	1.54665e-09	1.68117e-11	1.53682e-11
GOTERM_BP_FAT	GO:0045088~regulation of innate immune response	52	5.07317	2.43841e-13	CD40, IFI213, GFI1, IFI214, CGAS, PTPN22, TREM3, TNF, FCNB, KLRB1C, IL18RAP, KLRB1F, IL12A, KLRI1, OASL1, HAVCR2, CD96, TASL, FGR, OAS3, TLR12, TLR11, CD226, ADAM8, TLR6, CLEC4E, GM6377, TLR13, TXK, NLRC3, NLRC4, OAS1C, NOD2, MEFV, LRP8, RASGRP1, COCH, KLRK1, SLAMF8, SLAMF6, KLRC1, SLC15A3, CD300LF, IFI208, IFI206, CD160, SH2D1A, SCIMP, TREML4, F2RL1, KLRD1, ULBP1	838	384	20051	3.24014	1.60741e-09	1.72839e-11	1.57999e-11
GOTERM_BP_FAT	GO:0043207~response to external biotic stimulus	128	12.4878	2.66887e-13	IGHV3-5, IGHV3-4, PGLYRP2, CD80, GFI1, PRF1, EPX, MPO, TNF, IKZF3, CXCL15, RGS1, ENPP1, IL12A, GGT1, SKP2, HERC6, IGHV7-4, CD96, GBP8, GAS2L3, IFIT1BL1, FOXP3, UNC13D, IGHV1-19, NAIP6, CD8A, CLEC4E, IDO1, IGHV1-66, GATA3, NUGGC, SERPINA3F, KLRK1, SLAMF8, PMAIP1, STAP1, IGHV8-5, TRDC, WFDC18, CD160, IFI44, IL36G, IFNLR1, POU2F2, AICDA, DCLK1, IGHV14-1, TREML4, TNFSF8, IL7R, HAMP, IGHV1-5, CD40, IG…	838	1573	20051	1.94703	1.75966e-09	1.87162e-11	1.71092e-11
GOTERM_BP_FAT	GO:0007051~spindle organization	35	3.41463	4.96406e-13	RIPOR2, RGS14, CDCA8, KIF11, AURKB, CDC20, CCNB2, CCNB1, RACGAP1, HAUS8, NUF2, MYBL2, NEK2, DLGAP5, STIL, BORA, SPAG5, PLK1, KIF23, CCSAP, KNSTRN, NDC80, KIF4, CENPE, ASPM, TPX2, ESPL1, CENPH, KIFC1, PRC1, SASS6, TACC3, TRIM36, BIRC5, SPC25	838	189	20051	4.43096	3.27264e-09	3.44454e-11	3.14878e-11
GOTERM_BP_FAT	GO:0050900~leukocyte migration	52	5.07317	5.48269e-13	RIPOR2, ITGA2B, TREM3, EPX, TNF, CXCL15, ENPP1, TNFSF11, IL12A, MADCAM1, CCR7, CTSG, CCR6, CCR3, GPR35, ITGA2, MST1, RHOH, GREM1, IL1A, CH25H, JAML, IL1B, PADI2, ADAM8, CHST2, CX3CR1, CXCR5, NOD2, GATA3, FUT4, TRPM2, FUT7, CNR2, TBX21, CXCR2, SPP1, SLAMF8, STAP1, CCL17, SLAMF1, GM10591, GPR15, CCL22, TNFSF14, GCSAM, MCOLN2, ITGB2L, SELL, 2610528A11RIK, F2RL1, GPR18	838	392	20051	3.17402	3.61447e-09	3.76478e-11	3.44153e-11
GOTERM_BP_FAT	GO:0002699~positive regulation of immune effector process	47	4.58537	5.87033e-13	BLK, CD40, H2-M2, H2-Q2, PTPN22, NOD2, GATA3, PRKCZ, RASGRP1, TNF, PANX1, KLRB1C, IL18RAP, KLRK1, TBX21, MYB, SLAMF6, IL12A, CCR7, CD244A, KLRC1, IL13RA2, TNFRSF4, KLRI1, OASL1, SLAMF1, ATAD5, CD160, SH2D1A, SCIMP, FOXP3, UNC13D, FGR, ITGB2L, NR4A3, IL1B, CD28, LTA, MZB1, F2RL1, CD27, KLRD1, CD226, FCER2A, NFKBID, ULBP1, IL18R1	838	329	20051	3.41817	3.87066e-09	3.98941e-11	3.64687e-11
GOTERM_BP_FAT	GO:0042129~regulation of T cell proliferation	36	3.5122	6.08538e-13	RIPOR2, BLM, CD80, PTPN22, TNFRSF13C, CD3E, RASAL3, TSPAN32, ZC3H12D, BTLA, CTLA4, IL12A, CCR7, CD244A, IL12RB1, SLAMF1, HAVCR2, CARMIL2, ARG2, CDKN2A, BTN1A1, TNFRSF9, PDCD1LG2, BTNL2, FOXP3, ZAP70, IL1A, CD4, CD40LG, CD6, IL1B, TARM1, CD28, CLEC2I, CARD11, IDO1	838	201	20051	4.28547	4.01193e-09	4.09335e-11	3.74189e-11
GOTERM_BP_FAT	GO:0098542~defense response to other organism	86	8.39024	9.21837e-13	IGHV1-5, CD40, IGHV3-5, PGLYRP2, IGHV3-4, IGHV5-2, IGHV1-43, STAB2, PRF1, CGAS, PTPN22, IGHV1-47, TREM3, EPX, TNF, MPO, WFDC2, ITGAX, ENPP1, IL12A, CTSG, EAR1, SKP2, OASL1, HAVCR2, IGHV5-6, IGHV7-4, GBP8, ARG2, IGHV5-12, IGHV1-54, IGHV5-15, IFIT1BL1, FOXP3, UNC13D, IGHV1-19, FGR, RNASE2A, NAIP6, IGHV15-2, CD8A, IL1B, OAS3, TLR12, LTA, IGHE, CLEC4E, CX3CR1, IGHV2-5, CEBPE, IGHV1-20, IGHV1-66, NLRC…	838	894	20051	2.30172	6.07755e-09	6.13813e-11	5.6111e-11
GOTERM_BP_FAT	GO:0045619~regulation of lymphocyte differentiation	38	3.70732	1.40902e-12	BLM, PGLYRP2, FLT3, LEF1, DTX1, PRDM1, GATA3, PRKCZ, RASGRP1, IKZF3, TESPA1, TBX21, MYB, SLAMF8, CTLA4, IL12A, CCR7, H2-OA, CARMIL2, EGR3, CDKN2A, TNFRSF9, FANCA, RHOH, FOXP3, RUNX3, RUNX1, ZAP70, IL1A, LCK, IL1B, CD28, CD27, ADAM8, IL7R, TOX, NFKBID, CARD11	838	229	20051	3.97045	9.28943e-09	9.28825e-11	8.49075e-11
GOTERM_BP_FAT	GO:0045089~positive regulation of innate immune response	44	4.29268	1.44755e-12	CD40, TXK, IFI213, IFI214, CGAS, PTPN22, OAS1C, NOD2, NLRC4, TREM3, MEFV, RASGRP1, TNF, COCH, FCNB, KLRB1C, IL18RAP, KLRK1, SLAMF6, IL12A, KLRC1, SLC15A3, CD300LF, KLRI1, OASL1, HAVCR2, IFI208, TASL, IFI206, CD160, SH2D1A, SCIMP, TREML4, OAS3, TLR12, TLR11, F2RL1, KLRD1, CD226, ADAM8, TLR6, CLEC4E, ULBP1, TLR13	838	300	20051	3.50932	9.54343e-09	9.44775e-11	8.63656e-11
GOTERM_MF_FAT	GO:0004896~cytokine receptor activity	25	2.43902	1.60596e-12	CX3CR1, FLT3, CXCR5, IL5RA, IL1RAP, IL18RAP, CXCR2, IL21R, CCR8, CCR7, CCR6, IL12RB1, IL13RA2, CCR4, CCR3, XCR1, GPR35, IL1R2, IFNLR1, IL17RB, CD4, ACKR4, IL7R, IL9R, IL18R1	738	101	18102	6.0714	1.81632e-09	1.81634e-09	1.76816e-09
KEGG_PATHWAY	mmu05340:Primary immunodeficiency	16	1.56098	2.26608e-12	CD40, CD8B1, TNFRSF13C, CD3E, CD3D, AICDA, UNG, ZAP70, CD4, CD40LG, CD8A, LCK, CD19, BLNK, IL7R, ICOS	363	36	8998	11.0168	6.18639e-10	2.06969e-10	1.87329e-10
GOTERM_BP_FAT	GO:0050852~T cell receptor signaling pathway	29	2.82927	2.2892e-12	ITK, TXK, PTPN22, GATA3, CD3E, SLA2, TESPA1, FCHO1, CTLA4, CCR7, UBASH3A, KCNN4, CARMIL2, PVRIG, CD160, TRAT1, BTN1A1, SH2D1A, THEMIS, BTNL2, FOXP3, ZAP70, CD8A, CD28, CD226, CLEC2I, NFKBID, SKAP1, CARD11	838	137	20051	5.06488	1.50925e-08	1.47945e-10	1.35242e-10
GOTERM_BP_FAT	GO:0002703~regulation of leukocyte mediated immunity	44	4.29268	2.85094e-12	BLK, CD40, H2-M2, H2-Q2, NOD2, GATA3, PRKCZ, RASGRP1, TNF, FUT7, KLRB1C, IL18RAP, KLRK1, KLRB1F, TBX21, SLAMF6, IL12A, KLRC1, IL13RA2, KLRI1, SLAMF1, HAVCR2, CD96, CR2, ATAD5, CD160, SH2D1A, SCIMP, FOXP3, UNC13D, FGR, ITGB2L, CENPF, IL1B, CD28, LTA, F2RL1, KLRD1, CD226, FCER2A, IL7R, ULBP1, DNASE1L3, IL18R1	838	306	20051	3.44051	1.87963e-08	1.8246e-10	1.66794e-10
GOTERM_BP_FAT	GO:1902105~regulation of leukocyte differentiation	48	4.68293	5.38854e-12	BLM, PGLYRP2, GPR68, FLT3, LEF1, DTX1, PRDM1, GATA3, PRKCZ, RASGRP1, TNF, IKZF3, TESPA1, TBX21, MYB, SLAMF8, TNFSF11, CTLA4, EVI2, IL12A, CCR7, H2-OA, CARMIL2, EGR3, CDKN2A, TESC, TNFRSF9, GPR55, FANCA, RHOH, FOXP3, RUNX3, RUNX1, ZAP70, IL1A, CD4, CD40LG, LCK, IL1B, CD28, CD27, CLEC2I, ADAM8, IL7R, TOX, NFKBID, CD101, CARD11	838	363	20051	3.16393	3.55269e-08	3.38846e-10	3.09753e-10
GOTERM_BP_FAT	GO:0031349~positive regulation of defense response	55	5.36585	5.39728e-12	CD40, IFI213, IFI214, CGAS, PTPN22, TREM3, TNF, FCNB, KLRB1C, IL18RAP, TNFSF11, IL12A, CCR7, KLRI1, OASL1, HAVCR2, TASL, ITGA2, IL17RB, IL1B, OAS3, TLR12, LTA, TLR11, CD226, ADAM8, TLR6, CLEC4E, TLR13, IDO1, TXK, NLRC4, OAS1C, NOD2, MEFV, RASGRP1, COCH, KLRK1, SLAMF6, KLRC1, SLC15A3, CD300LF, IFI208, IFI206, CD160, SH2D1A, OSM, SCIMP, CD6, TREML4, TARM1, CD28, F2RL1, KLRD1, ULBP1	838	457	20051	2.87964	3.5584e-08	3.38846e-10	3.09753e-10
KEGG_PATHWAY	mmu04514:Cell adhesion molecules	32	3.12195	5.74408e-12	CD40, H2-M2, CD80, H2-Q2, CDH1, H2-OB, CTLA4, MADCAM1, H2-OA, TIGIT, ICOS, H2-EB2, GLYCAM1, CD8B1, PDCD1LG2, H2-T-PS, L1CAM, CLDN11, CLDN4, CD4, ITGB2L, CLDN3, CD40LG, CD6, SELL, CD8A, CLDN8, CLDN7, CD28, CD226, PDCD1, CD22	363	182	8998	4.35831	1.56813e-09	3.93469e-10	3.56133e-10
GOTERM_BP_FAT	GO:0042742~defense response to bacterium	64	6.2439	6.23005e-12	IGHV1-5, IGHV3-5, PGLYRP2, IGHV3-4, IGHV5-2, IGHV1-43, STAB2, IGHV1-47, TREM3, EPX, TNF, MPO, WFDC2, IL12A, CTSG, EAR1, HAVCR2, IGHV5-6, IGHV7-4, GBP8, ARG2, IGHV5-12, IGHV1-54, IGHV5-15, IGHV1-19, FGR, RNASE2A, NAIP6, IGHV15-2, IL1B, OAS3, LTA, IGHE, CLEC4E, IGHV2-5, CEBPE, IGHV1-20, IGHV1-66, NLRC4, OAS1C, NOD2, COCH, KLRK1, SLAMF8, IGHV8-5, TRDC, WFDC18, IGHV2-9, EAR6, IGHV1-62-2, IGHV1-62-3, …	838	587	20051	2.60876	4.10745e-08	3.87438e-10	3.54172e-10
GOTERM_BP_FAT	GO:0045580~regulation of T cell differentiation	34	3.31707	7.2744e-12	BLM, LEF1, DTX1, PRDM1, GATA3, PRKCZ, RASGRP1, TESPA1, TBX21, MYB, CTLA4, IL12A, CCR7, H2-OA, CARMIL2, EGR3, CDKN2A, TNFRSF9, FANCA, RHOH, FOXP3, RUNX3, RUNX1, ZAP70, IL1A, LCK, IL1B, CD28, CD27, ADAM8, IL7R, TOX, NFKBID, CARD11	838	196	20051	4.15064	4.79601e-08	4.48157e-10	4.09678e-10
GOTERM_BP_FAT	GO:0071174~mitotic spindle checkpoint	18	1.7561	8.14723e-12	STIL, ZWILCH, PLK1, CDCA8, AURKB, NDC80, CDC20, MTBP, CENPE, CCNB1, NUF2, BIRC5, KNTC1, SPDL1, TRIP13, BUB1, SPC24, SPC25	838	50	20051	8.61379	5.37149e-08	4.97283e-10	4.54585e-10
GOTERM_BP_FAT	GO:0050853~B cell receptor signaling pathway	37	3.60976	1.39313e-11	BLK, IGHV1-5, ITK, IGHV3-5, IGHV3-4, IGHV2-5, IGHV5-2, IGHV1-20, IGHV1-43, IGHV1-66, IGHV1-47, CD19, BLNK, STAP1, IGHV8-5, CTLA4, TRDC, IGHV7-4, IGHV2-9, IGHV5-6, IGHV1-62-2, IGHV1-62-3, FCRL5, IGHV5-12, IGHV1-31, IGHV1-54, IGHV1-34, IGHV5-15, IGHV1-37, IGHV1-19, IGHV14-1, IGHV12-3, IGHV15-2, LCK, IGHE, MS4A1, CD22	838	235	20051	3.76726	9.18491e-08	8.42524e-10	7.70184e-10
GOTERM_BP_FAT	GO:0031577~spindle checkpoint	18	1.7561	1.67839e-11	STIL, ZWILCH, PLK1, CDCA8, AURKB, NDC80, CDC20, MTBP, CENPE, CCNB1, NUF2, BIRC5, KNTC1, SPDL1, TRIP13, BUB1, SPC24, SPC25	838	52	20051	8.28249	1.10656e-07	9.9675e-10	9.11167e-10
GOTERM_BP_FAT	GO:0045841~negative regulation of mitotic metaphase/anaphase transition	18	1.7561	1.67839e-11	STIL, ZWILCH, PLK1, CDCA8, AURKB, NDC80, CDC20, MTBP, CENPE, CCNB1, NUF2, BIRC5, KNTC1, SPDL1, TRIP13, BUB1, SPC24, SPC25	838	52	20051	8.28249	1.10656e-07	9.9675e-10	9.11167e-10
GOTERM_BP_FAT	GO:0050854~regulation of antigen receptor-mediated signaling pathway	20	1.95122	1.84016e-11	BLK, FCRL5, PVRIG, CD160, TRAT1, SH2D1A, PTPN22, BTNL2, GCSAM, SLA2, TESPA1, LCK, CD19, STAP1, CD226, CCR7, UBASH3A, KCNN4, CD22, CARD11	838	67	20051	7.14245	1.21322e-07	1.08307e-09	9.90074e-10
GOTERM_MF_FAT	GO:0003823~antigen binding	42	4.09756	1.85843e-11	IGHV1-5, CD40, IGHV3-5, IGHV3-4, IGHV2-5, IGHV5-2, H2-M2, IGHV1-20, IGHV1-43, IGHV1-66, H2-Q2, IGHV1-47, FCNB, H2-OB, IGHV8-5, TRBV1, TRDC, KLRC1, H2-OA, IGHV7-4, IGHV2-9, IGHV5-6, TRBV29, IGHV1-62-2, H2-EB2, IGHV1-62-3, IGHV5-12, CD160, IGHV1-31, IGHV1-54, IGHV1-34, IGHV5-15, IGHV1-37, IGHV1-19, CD4, IGHV14-1, IGHV12-3, IGHV15-2, CD8A, LCK, IGHE, KLRD1	738	306	18102	3.36665	2.10188e-08	1.05094e-08	1.02306e-08
GOTERM_BP_FAT	GO:0033077~T cell differentiation in thymus	24	2.34146	2.04228e-11	BLM, EGR3, BCL11B, CDKN2A, TNFRSF9, CD3G, GATA3, CD3E, FOXP3, CD3D, RASGRP1, ZAP70, IL1A, TESPA1, IL1B, CD28, CCR7, ADAM8, CCR6, TOX, IL7R, NFKBID, CARD11, WNT4	838	101	20051	5.68567	1.34648e-07	1.19139e-09	1.0891e-09
GOTERM_BP_FAT	GO:0006954~inflammatory response	73	7.12195	2.27451e-11	CD40, IL1RN, IL5RA, IL1RAP, TNF, CXCL15, RAB44, SERPINA1B, IL18RAP, PBK, ENPP1, TNFSF11, CCR7, CCR6, TNFRSF4, CCR4, CCR3, HAVCR2, CD96, CR2, ITGA2, IL1R2, FOXP3, ADRA2A, UNC13D, IL17RB, IL1A, F8, ELF3, NAIP6, IL1B, TLR12, LTA, CHIL1, TLR11, ADAM8, TLR6, DNASE1L3, CHST2, TLR13, IDO1, CX3CR1, FPR1, NLRC3, NLRC4, NOD2, GATA3, MEFV, PRKCZ, RASGRP1, FUT4, NT5E, FUT7, CNR2, CXCR2, SLAMF8, CCL17, SLAMF1…	838	742	20051	2.35402	1.49959e-07	1.31523e-09	1.2023e-09
GOTERM_BP_FAT	GO:2000816~negative regulation of mitotic sister chromatid separation	18	1.7561	2.37573e-11	STIL, ZWILCH, PLK1, CDCA8, AURKB, NDC80, CDC20, MTBP, CENPE, CCNB1, NUF2, BIRC5, KNTC1, SPDL1, TRIP13, BUB1, SPC24, SPC25	838	53	20051	8.12622	1.56632e-07	1.36181e-09	1.24488e-09
GOTERM_BP_FAT	GO:0002695~negative regulation of leukocyte activation	34	3.31707	2.55485e-11	BLK, RIPOR2, PGLYRP2, FLT3, CD80, DTX1, PTPN22, CST7, SAMSN1, TSPAN32, ZC3H12D, CNR2, TBX21, TBC1D10C, BTLA, CTLA4, CTSG, TIGIT, CD300LF, IL13RA2, HAVCR2, ARG2, CDKN2A, BTN1A1, PDCD1LG2, FOXP3, RUNX3, LAX1, RUNX1, FGR, BANK1, TARM1, NFKBID, IDO1	838	205	20051	3.96841	1.68441e-07	1.45186e-09	1.3272e-09
GOTERM_BP_FAT	GO:0007052~mitotic spindle organization	25	2.43902	2.96743e-11	RIPOR2, CDCA8, KIF11, AURKB, CDC20, CCNB1, RACGAP1, NUF2, MYBL2, NEK2, DLGAP5, STIL, PLK1, KIF23, CCSAP, NDC80, KIF4, CENPE, TPX2, CENPH, KIFC1, PRC1, TACC3, BIRC5, SPC25	838	112	20051	5.34089	1.95642e-07	1.67191e-09	1.52835e-09
GOTERM_BP_FAT	GO:1902100~negative regulation of metaphase/anaphase transition of cell cycle	18	1.7561	3.33367e-11	STIL, ZWILCH, PLK1, CDCA8, AURKB, NDC80, CDC20, MTBP, CENPE, CCNB1, NUF2, BIRC5, KNTC1, SPDL1, TRIP13, BUB1, SPC24, SPC25	838	54	20051	7.97574	2.19789e-07	1.86234e-09	1.70243e-09
GOTERM_BP_FAT	GO:1902850~microtubule cytoskeleton organization involved in mitosis	25	2.43902	3.62114e-11	RIPOR2, CDCA8, KIF11, AURKB, CDC20, CCNB1, RACGAP1, NUF2, MYBL2, NEK2, DLGAP5, STIL, PLK1, KIF23, CCSAP, NDC80, KIF4, CENPE, TPX2, CENPH, KIFC1, PRC1, TACC3, BIRC5, SPC25	838	113	20051	5.29363	2.38742e-07	2.00593e-09	1.8337e-09
GOTERM_BP_FAT	GO:0009617~response to bacterium	100	9.7561	3.91454e-11	IGHV3-5, IGHV3-4, PGLYRP2, CD80, GFI1, EPX, MPO, TNF, IKZF3, CXCL15, RGS1, IL12A, GGT1, HERC6, IGHV7-4, CD96, GBP8, GAS2L3, FOXP3, IGHV1-19, NAIP6, CLEC4E, IDO1, IGHV1-66, NUGGC, SERPINA3F, KLRK1, SLAMF8, STAP1, IGHV8-5, TRDC, WFDC18, CD160, IFI44, IL36G, AICDA, IGHV14-1, TNFSF8, IL7R, HAMP, IGHV1-5, CD40, IGHV5-2, IGHV1-43, STAB2, PTPN22, TREM3, IGHV1-47, WFDC2, CCR7, CTSG, EAR1, HAVCR1, CCR4, H…	838	1195	20051	2.00228	2.58085e-07	2.15039e-09	1.96575e-09
GOTERM_BP_FAT	GO:1905819~negative regulation of chromosome separation	18	1.7561	4.63913e-11	STIL, ZWILCH, PLK1, CDCA8, AURKB, NDC80, CDC20, MTBP, CENPE, CCNB1, NUF2, BIRC5, KNTC1, SPDL1, TRIP13, BUB1, SPC24, SPC25	838	55	20051	7.83072	3.05858e-07	2.52737e-09	2.31036e-09
GOTERM_BP_FAT	GO:0009605~response to external stimulus	203	19.8049	5.19252e-11	IGHV3-5, IGHV3-4, PGLYRP2, GFI1, PRF1, AQP3, IKZF3, TNFSF11, IL12A, SKP2, HERC6, GBP8, IL1R2, BHLHA15, RUNX3, RUNX2, UNC13D, TIAM1, CH25H, CLDN3, RRAGB, PADI2, IDO1, TXK, IGHV1-66, FPR1, GATA3, MEFV, NUGGC, TRPM2, KLRK1, NUAK2, SLAMF8, WFDC18, SLAMF1, GM10591, EGR2, XCR1, EGR3, TNFSF14, BCL11B, IFI44, IL36G, IFNLR1, L1CAM, DCLK1, TREML4, CD28, TNFSF8, HAMP, GPR18, CD40, IGHV5-2, IGHV1-43, STAB2, …	838	3141	20051	1.54639	3.42343e-07	2.80566e-09	2.56477e-09
GOTERM_BP_FAT	GO:0060326~cell chemotaxis	43	4.19512	6.47244e-11	CX3CR1, RIPOR2, LEF1, CXCR5, NOD2, TREM3, CXCL15, TRPM2, CNR2, CXCR2, SPP1, SLAMF8, STAP1, CCR8, TNFSF11, IL12A, CCR7, CTSG, CCR6, CCL17, CCR4, CCR3, SLAMF1, GM10591, CCL22, EGR3, XCR1, TNFSF14, GPR35, MST1, GREM1, TIAM1, CH25H, ITGB2L, JAML, SELL, IL1B, 2610528A11RIK, ACKR4, PADI2, F2RL1, ADAM8, GPR18	838	323	20051	3.18536	4.26727e-07	3.46881e-09	3.17097e-09
GOTERM_BP_FAT	GO:0030595~leukocyte chemotaxis	36	3.5122	6.80058e-11	CX3CR1, RIPOR2, CXCR5, NOD2, TREM3, CXCL15, TRPM2, CNR2, CXCR2, SPP1, SLAMF8, STAP1, TNFSF11, IL12A, CCR7, CTSG, CCR6, CCL17, CCR3, SLAMF1, GM10591, CCL22, TNFSF14, GPR35, MST1, GREM1, CH25H, ITGB2L, JAML, SELL, IL1B, 2610528A11RIK, PADI2, F2RL1, ADAM8, GPR18	838	236	20051	3.64991	4.48362e-07	3.61527e-09	3.30486e-09
GOTERM_BP_FAT	GO:0002706~regulation of lymphocyte mediated immunity	36	3.5122	7.63898e-11	CD40, H2-M2, H2-Q2, NOD2, GATA3, PRKCZ, RASGRP1, TNF, FUT7, KLRB1C, IL18RAP, KLRK1, KLRB1F, TBX21, SLAMF6, IL12A, KLRC1, KLRI1, SLAMF1, HAVCR2, CD96, CR2, ATAD5, CD160, SH2D1A, FOXP3, CENPF, IL1B, CD28, LTA, KLRD1, CD226, FCER2A, IL7R, ULBP1, IL18R1	838	237	20051	3.63451	5.03638e-07	4.02849e-09	3.6826e-09
GOTERM_BP_FAT	GO:0050866~negative regulation of cell activation	35	3.41463	1.09482e-10	BLK, RIPOR2, PGLYRP2, FLT3, CD80, DTX1, PTPN22, CST7, SAMSN1, TSPAN32, ZC3H12D, CNR2, TBX21, TBC1D10C, BTLA, CTLA4, CTSG, TIGIT, CD300LF, IL13RA2, HAVCR2, ARG2, CDKN2A, BTN1A1, FGG, PDCD1LG2, FOXP3, RUNX3, LAX1, RUNX1, FGR, BANK1, TARM1, NFKBID, IDO1	838	228	20051	3.67304	7.21817e-07	5.72784e-09	5.23603e-09
GOTERM_BP_FAT	GO:0033048~negative regulation of mitotic sister chromatid segregation	18	1.7561	1.19353e-10	STIL, ZWILCH, PLK1, CDCA8, AURKB, NDC80, CDC20, MTBP, CENPE, CCNB1, NUF2, BIRC5, KNTC1, SPDL1, TRIP13, BUB1, SPC24, SPC25	838	58	20051	7.42569	7.86895e-07	6.19508e-09	5.66316e-09
GOTERM_BP_FAT	GO:0007091~metaphase/anaphase transition of mitotic cell cycle	19	1.85366	1.28108e-10	STIL, ZWILCH, PLK1, CDCA8, AURKB, NDC80, CDC20, MTBP, CENPE, CCNB1, NUF2, TACC3, BIRC5, KNTC1, SPDL1, TRIP13, BUB1, SPC24, SPC25	838	66	20051	6.88814	8.44616e-07	6.59757e-09	6.03109e-09
GOTERM_BP_FAT	GO:0002705~positive regulation of leukocyte mediated immunity	33	3.21951	1.3247e-10	CD40, H2-M2, H2-Q2, NOD2, GATA3, PRKCZ, RASGRP1, TNF, KLRB1C, IL18RAP, KLRK1, TBX21, SLAMF6, IL12A, KLRC1, KLRI1, SLAMF1, ATAD5, CD160, SH2D1A, SCIMP, FOXP3, FGR, ITGB2L, IL1B, CD28, LTA, F2RL1, KLRD1, CD226, FCER2A, ULBP1, IL18R1	838	206	20051	3.833	8.73377e-07	6.76934e-09	6.18812e-09
GOTERM_BP_FAT	GO:0080134~regulation of response to stress	125	12.1951	1.44771e-10	IL1RN, PGLYRP2, IFI213, GFI1, IFI214, FZD10, TNF, FCNB, IL18RAP, KLRB1C, KLRB1F, TNFSF11, IL12A, MAP3K9, GGT1, CD96, UNC5CL, IL1R2, DDX11, IFIT1BL1, FOXP3, TIAM1, CLDN4, CLDN3, NAIP6, CD226, ADAM8, TNIK, CLEC4E, GM6377, IDO1, RTN4R, BLK, RNASEH2B, BLM, TXK, GATA3, MEFV, RASGRP1, RAD51AP1, TRPM2, CRACR2A, FUT7, KLRK1, FIGNL1, SLAMF8, PMAIP1, SLAMF6, KLRC1, SLC15A3, CD300LF, SLAMF1, WNT4, BARD1, CD…	838	1670	20051	1.79096	9.54475e-07	7.34101e-09	6.7107e-09
GOTERM_CC_FAT	GO:0072686~mitotic spindle	32	3.12195	1.55601e-10	KIF11, AURKB, CDC14A, RACGAP1, HAUS8, CXCR2, NUSAP1, ECT2, SPAG5, CKAP2L, TRAT1, CEP295, PLK1, CKAP2, CDC7, KIF23, KIF22, CDC6, CCSAP, KNSTRN, IL17RB, CENPE, ASPM, TPX2, KIF18B, ESPL1, KIFC1, PRC1, TACC3, CDK1, PTPN7, KIF20B	743	185	16713	3.89084	1.06431e-07	2.66078e-08	2.52074e-08
GOTERM_BP_FAT	GO:0046634~regulation of alpha-beta T cell activation	25	2.43902	1.64168e-10	BLM, CD80, PTPN22, PRDM1, GATA3, CD3E, RASAL3, PRKCZ, TBX21, MYB, BTLA, IL12A, CCR7, CD244A, IL12RB1, ARG2, CD160, FOXP3, RUNX3, RUNX1, ZAP70, TARM1, CD28, NFKBID, CARD11	838	121	20051	4.94364	1.08236e-06	8.26104e-09	7.55173e-09
GOTERM_BP_FAT	GO:0002708~positive regulation of lymphocyte mediated immunity	29	2.82927	1.74783e-10	CD40, H2-M2, H2-Q2, NOD2, GATA3, PRKCZ, RASGRP1, TNF, KLRB1C, IL18RAP, KLRK1, TBX21, SLAMF6, IL12A, KLRC1, KLRI1, SLAMF1, ATAD5, CD160, SH2D1A, FOXP3, IL1B, CD28, LTA, KLRD1, CD226, FCER2A, ULBP1, IL18R1	838	163	20051	4.25699	1.15234e-06	8.67914e-09	7.93393e-09
GOTERM_BP_FAT	GO:0051250~negative regulation of lymphocyte activation	30	2.92683	1.7511e-10	BLK, RIPOR2, PGLYRP2, FLT3, CD80, DTX1, PTPN22, SAMSN1, TSPAN32, ZC3H12D, TBX21, TBC1D10C, BTLA, CTLA4, CTSG, TIGIT, HAVCR2, ARG2, CDKN2A, BTN1A1, PDCD1LG2, FOXP3, RUNX3, LAX1, RUNX1, FGR, BANK1, TARM1, NFKBID, IDO1	838	174	20051	4.12538	1.1545e-06	8.67914e-09	7.93393e-09
GOTERM_BP_FAT	GO:0042102~positive regulation of T cell proliferation	24	2.34146	1.89804e-10	CARMIL2, BLM, CD80, PTPN22, BTNL2, TNFRSF13C, PDCD1LG2, RASAL3, CD3E, FOXP3, ZAP70, IL1A, CD4, CD40LG, CD6, IL1B, CD28, CCR7, CD244A, IL12A, IL12RB1, CARD11, SLAMF1, HAVCR2	838	112	20051	5.12726	1.25138e-06	9.33724e-09	8.53553e-09
GOTERM_BP_FAT	GO:0033046~negative regulation of sister chromatid segregation	18	1.7561	2.16274e-10	STIL, ZWILCH, PLK1, CDCA8, AURKB, NDC80, CDC20, MTBP, CENPE, CCNB1, NUF2, BIRC5, KNTC1, SPDL1, TRIP13, BUB1, SPC24, SPC25	838	60	20051	7.17816	1.42589e-06	1.05606e-08	9.65382e-09
GOTERM_BP_FAT	GO:0002366~leukocyte activation involved in immune response	43	4.19512	2.46802e-10	BLK, CX3CR1, CD40, PGLYRP2, LEF1, MRGPRB1, GATA3, PRKCZ, RASGRP1, UNG, RAB44, CRACR2A, TBX21, CD19, MYB, ENPP1, SLAMF6, CCR7, CD244A, KLRC1, CCR6, IL13RA2, SLAMF1, HAVCR2, EOMES, ATAD5, CD160, FOXP3, AICDA, UNC13D, BATF, FGR, ITGB2L, NR4A3, CD40LG, CD28, F2RL1, CLEC4E, NFKBID, DNASE1L3, LAT, IL18R1, GAPT	838	337	20051	3.05303	1.62717e-06	1.19627e-08	1.09355e-08
GOTERM_BP_FAT	GO:0090068~positive regulation of cell cycle process	39	3.80488	3.47453e-10	CDCA5, LEF1, MRGPRB1, CXCR5, TGFA, CDCA8, NCAPG, TNF, AURKB, CDC14A, RAD51AP1, MTBP, CCNB1, RACGAP1, PBK, NUSAP1, ECT2, WNT4, E2F8, STIL, RRM2, ATAD5, SPAG5, UBE2C, DDX11, CEP295, CDC7, KIF23, CDC6, NDC80, CENPE, IL1A, DBF4, IL1B, CD28, SASS6, CDK1, BIRC5, KIF20B	838	288	20051	3.24014	2.29075e-06	1.67183e-08	1.52829e-08
GOTERM_BP_FAT	GO:0002263~cell activation involved in immune response	43	4.19512	3.60064e-10	BLK, CX3CR1, CD40, PGLYRP2, LEF1, MRGPRB1, GATA3, PRKCZ, RASGRP1, UNG, RAB44, CRACR2A, TBX21, CD19, MYB, ENPP1, SLAMF6, CCR7, CD244A, KLRC1, CCR6, IL13RA2, SLAMF1, HAVCR2, EOMES, ATAD5, CD160, FOXP3, AICDA, UNC13D, BATF, FGR, ITGB2L, NR4A3, CD40LG, CD28, F2RL1, CLEC4E, NFKBID, DNASE1L3, LAT, IL18R1, GAPT	838	341	20051	3.01721	2.3739e-06	1.71996e-08	1.57228e-08
GOTERM_BP_FAT	GO:0051240~positive regulation of multicellular organismal process	148	14.439	3.78801e-10	FOXA1, FAAH, GPR68, IL1RAP, EPX, NCMAP, TNF, CDC20, FCNB, CLEC5A, MYB, XLR4B, TNFRSF8, TNFSF11, IL12A, CD244A, PLXNC1, RFX3, RUNX3, FOXP3, RUNX2, RUNX1, TIAM1, SPINT1, CHIL1, CD226, ADAM8, TNIK, KIF20B, CLEC4E, TOX, CD101, CARD11, IDO1, BLM, TXK, SHOX2, RASAL1, GATA3, MEFV, PRKCZ, RASGRP1, CCNB1, KLRK1, TESPA1, EVI2, SLAMF6, ECT2, SLAMF1, WNT4, PACSIN1, EGR2, CARMIL2, EGR3, LRRN3, VDR, CD160, BCL…	838	2127	20051	1.66489	2.49743e-06	1.79644e-08	1.6422e-08
GOTERM_BP_FAT	GO:0045787~positive regulation of cell cycle	46	4.4878	3.93703e-10	FOXA1, CDCA5, LEF1, MRGPRB1, CXCR5, TGFA, CDCA8, NCAPG, BRCA1, TNF, AURKB, CDC14A, RAD51AP1, TGM1, MTBP, CCNB1, RACGAP1, PBK, NUSAP1, ECT2, WNT4, E2F8, BARD1, STIL, RRM2, ATAD5, SPAG5, UBE2C, DDX11, CEP295, CDC7, KIF23, CDC6, PROX1, NDC80, CENPE, IL1A, CENPF, NR4A3, DBF4, IL1B, CD28, SASS6, CDK1, BIRC5, KIF20B	838	383	20051	2.87376	2.59568e-06	1.85378e-08	1.69461e-08
GOTERM_BP_FAT	GO:0007346~regulation of mitotic cell cycle	59	5.7561	4.08646e-10	FOXA1, RIPOR2, ZWILCH, BRCA1, KIF11, MKI67, TNF, CDC14A, ZC3H12D, CDC20, MTBP, NUF2, PBK, NUSAP1, NEK2, KNTC1, SPDL1, DLGAP5, BORA, HASPIN, CCSAP, IL1A, DBF4, IL1B, BIRC5, KIF20B, RNASEH2B, BLM, CDCA2, CDCA5, TGFA, CDCA8, AURKB, CCNB1, RBBP8, CLSPN, BUB1, BARD1, MBD4, STIL, RRM2, ATAD5, UBE2C, CDKN2A, PLK1, CDC7, CDC6, NDC80, TPX2, CENPE, CENPF, CD28, SASS6, TACC3, CDK1, TRIP13, SPC24, TJP3, SPC25	838	572	20051	2.46802	2.6942e-06	1.91049e-08	1.74646e-08
GOTERM_BP_FAT	GO:0006909~phagocytosis	50	4.87805	4.8928e-10	IGHV1-5, SIRPB1B, SIRPB1A, IGHV3-5, IGHV3-4, IGHV5-2, IGHV1-43, IGHV1-47, TNF, FCNB, CCR7, GM9733, HAVCR1, IGHV5-6, IGHV7-4, IGHV5-12, ITGA2, IGHV1-54, RHOH, IGHV5-15, UNC13D, IGHV1-19, IGHV15-2, IL1B, IGHE, RAB39, SIRPB1C, IGHV2-5, CEBPE, IGHV1-20, IGHV1-66, NOD2, STAP1, IGHV8-5, TRDC, CD300LF, IGHV2-9, SLAMF1, GM5150, IGHV1-62-2, IGHV1-62-3, IGHV1-31, IGHV1-34, IGHV1-37, MARCO, IGHV14-1, IGHV12…	838	442	20051	2.7067	3.22582e-06	2.27136e-08	2.07634e-08
GOTERM_BP_FAT	GO:0051985~negative regulation of chromosome segregation	18	1.7561	5.02902e-10	STIL, ZWILCH, PLK1, CDCA8, AURKB, NDC80, CDC20, MTBP, CENPE, CCNB1, NUF2, BIRC5, KNTC1, SPDL1, TRIP13, BUB1, SPC24, SPC25	838	63	20051	6.83635	3.31563e-06	2.31827e-08	2.11922e-08
GOTERM_BP_FAT	GO:0071173~spindle assembly checkpoint	15	1.46341	5.39837e-10	ZWILCH, PLK1, CDCA8, AURKB, NDC80, CDC20, CENPE, NUF2, BIRC5, KNTC1, SPDL1, TRIP13, BUB1, SPC24, SPC25	838	41	20051	8.75386	3.55914e-06	2.45421e-08	2.24349e-08
GOTERM_BP_FAT	GO:0007094~mitotic spindle assembly checkpoint	15	1.46341	5.39837e-10	ZWILCH, PLK1, CDCA8, AURKB, NDC80, CDC20, CENPE, NUF2, BIRC5, KNTC1, SPDL1, TRIP13, BUB1, SPC24, SPC25	838	41	20051	8.75386	3.55914e-06	2.45421e-08	2.24349e-08
GOTERM_BP_FAT	GO:0000075~cell cycle checkpoint	31	3.02439	5.5984e-10	RNASEH2B, BLM, ZWILCH, CDCA8, BRCA1, AURKB, CDC20, MTBP, CCNB1, NUF2, PBK, RBBP8, KNTC1, CLSPN, SPDL1, BUB1, BARD1, MBD4, STIL, PLK1, CDC6, PROX1, NDC80, CENPE, RAD51, CDK1, BIRC5, TRIP13, DNA2, SPC24, SPC25	838	194	20051	3.82342	3.69102e-06	2.52772e-08	2.31068e-08
GOTERM_CC_FAT	GO:0000776~kinetochore	29	2.82927	5.78556e-10	ERCC6L, ZWILCH, CENPA, NSL1, AURKB, MTBP, CCNB1, DSN1, NUF2, NEK2, KNTC1, SPDL1, BUB1, SPAG5, PLK1, KNL1, KNSTRN, NDC80, CENPE, CENPF, CENPH, CENPM, BIRC5, KIF2C, CENPN, CENPQ, SPC24, SPC25, CENPS	743	162	16713	4.02669	3.95732e-07	7.62265e-08	7.22145e-08
GOTERM_CC_FAT	GO:0000775~chromosome, centromeric region	36	3.5122	6.68653e-10	TOP2A, ERCC6L, ZWILCH, CDCA8, NCAPG, MKI67, CENPA, NSL1, AURKB, MTBP, CCNB1, DSN1, NUF2, NEK2, KNTC1, SPDL1, BUB1, WDHD1, HELLS, SPAG5, PLK1, KNL1, KNSTRN, NDC80, CENPE, CENPF, CENPH, CENPL, CENPM, BIRC5, KIF2C, CENPN, CENPQ, SPC24, SPC25, CENPS	743	242	16713	3.34621	4.57359e-07	7.62265e-08	7.22145e-08
GOTERM_BP_FAT	GO:0050671~positive regulation of lymphocyte proliferation	27	2.63415	7.41312e-10	BLM, CD40, CD80, PTPN22, TNFRSF13C, CD3E, RASAL3, IL12A, CCR7, CD244A, IL12RB1, TNFRSF4, SLAMF1, HAVCR2, CARMIL2, ATAD5, PDCD1LG2, BTNL2, FOXP3, ZAP70, IL1A, CD4, CD40LG, CD6, IL1B, CD28, CARD11	838	151	20051	4.27837	4.88746e-06	3.32431e-08	3.03888e-08
GOTERM_BP_FAT	GO:0046632~alpha-beta T cell differentiation	25	2.43902	7.70443e-10	ITK, BLM, TXK, LEF1, PRDM1, GATA3, PRKCZ, CRACR2A, FUT7, TBX21, MYB, SLAMF6, CCR7, EOMES, BCL11B, FOXP3, RUNX3, BATF, RUNX1, ZAP70, TNFSF8, TOX, NFKBID, GPR18, IL18R1	838	130	20051	4.60139	5.07951e-06	3.43159e-08	3.13695e-08
GOTERM_BP_FAT	GO:0007093~mitotic cell cycle checkpoint	27	2.63415	8.5949e-10	BLM, ZWILCH, CDCA8, BRCA1, AURKB, CDC20, MTBP, CCNB1, NUF2, PBK, RBBP8, KNTC1, CLSPN, SPDL1, BUB1, BARD1, MBD4, STIL, PLK1, CDC6, NDC80, CENPE, CDK1, BIRC5, TRIP13, SPC24, SPC25	838	152	20051	4.25023	5.6666e-06	3.80252e-08	3.47603e-08
GOTERM_BP_FAT	GO:0008283~cell proliferation	149	14.5366	8.8156e-10	RIPOR2, EHF, CD80, PRDM1, MKI67, TNF, IKZF3, TGM1, ZC3H12D, CDC20, MTBP, IL18RAP, CDH1, ENPP1, TNFSF11, IL12A, CD244A, SKP2, TNFRSF4, RNF43, BTN1A1, IFT80, RUNX3, FOXP3, RUNX2, RUNX1, TIAM1, MELK, CLDN3, JAML, SPINT1, CLDN7, LMX1B, KIF20B, TOX, CARD11, IDO1, BLK, RNASEH2B, BLM, SH2D2A, SHOX2, TACSTD2, TGFA, GATA3, RASAL3, PRKCZ, RASGRP1, CCNB1, RACGAP1, FIGNL1, CD19, BTLA, MAP7, PMAIP1, SLAMF6, F…	838	2173	20051	1.64066	5.81211e-06	3.87416e-08	3.54152e-08
GOTERM_BP_FAT	GO:0032946~positive regulation of mononuclear cell proliferation	27	2.63415	1.15073e-09	BLM, CD40, CD80, PTPN22, TNFRSF13C, CD3E, RASAL3, IL12A, CCR7, CD244A, IL12RB1, TNFRSF4, SLAMF1, HAVCR2, CARMIL2, ATAD5, PDCD1LG2, BTNL2, FOXP3, ZAP70, IL1A, CD4, CD40LG, CD6, IL1B, CD28, CARD11	838	154	20051	4.19503	7.58676e-06	5.0236e-08	4.59227e-08
GOTERM_BP_FAT	GO:0002700~regulation of production of molecular mediator of immune response	32	3.12195	1.19102e-09	CD40, CGAS, PTPN22, NOD2, GATA3, EPX, PRKCZ, TNF, SIGLECG, VPREB3, PANX1, TBX21, CD244A, IL13RA2, TNFRSF4, SLAMF1, CD96, ATAD5, CD160, SCIMP, FOXP3, CENPF, NR4A3, CD40LG, IL1B, CD28, MZB1, F2RL1, CD27, CD226, CD22, IL18R1	838	212	20051	3.61165	7.85234e-06	5.16525e-08	4.72176e-08
GOTERM_BP_FAT	GO:0050871~positive regulation of B cell activation	37	3.60976	1.26148e-09	IGHV1-5, CD40, IGHV3-5, IGHV3-4, IGHV2-5, IGHV5-2, IGHV1-20, IGHV1-43, IGHV1-66, IGHV1-47, NOD2, TNFRSF13C, TBX21, IGHV8-5, TRDC, TNFRSF4, IGHV7-4, IGHV2-9, IGHV5-6, IGHV1-62-2, IGHV1-62-3, IGHV5-12, ATAD5, IGHV1-31, IGHV1-54, IGHV1-34, IGHV5-15, IGHV1-37, IGHV1-19, IGHV14-1, CD40LG, IGHV12-3, IGHV15-2, CD28, CD27, IGHE, CARD11	838	275	20051	3.2193	8.31688e-06	5.43507e-08	4.96841e-08
GOTERM_BP_FAT	GO:0051225~spindle assembly	24	2.34146	1.33604e-09	RIPOR2, STIL, SPAG5, PLK1, CDCA8, KIF23, KIF11, CCSAP, AURKB, NDC80, KIF4, CDC20, CENPE, TPX2, CCNB2, ASPM, RACGAP1, HAUS8, KIFC1, PRC1, SASS6, BIRC5, MYBL2, NEK2	838	123	20051	4.66872	8.80849e-06	5.71895e-08	5.22792e-08
GOTERM_CC_FAT	GO:0005819~spindle	50	4.87805	1.59278e-09	KIF11, CDC14A, KIF15, CDC20, NUSAP1, NEK2, KNTC1, SPDL1, DLGAP5, BORA, CKAP2L, CEP295, DDX11, CKAP2, KIF23, KIF22, HASPIN, CCSAP, KNSTRN, IL17RB, ASPM, ESPL1, KIFC1, BIRC5, KIF2C, KIF20A, KIF20B, RGS14, CDCA8, HMMR, AURKB, CCNB1, RACGAP1, HAUS8, CXCR2, ECT2, SPAG5, TRAT1, PLK1, CDC7, CDC6, TPX2, CENPE, CENPF, KIF18B, PRC1, TACC3, CDK1, PTPN7, KBTBD8	743	432	16713	2.60347	1.08946e-06	1.55637e-07	1.47446e-07
GOTERM_BP_FAT	GO:0045839~negative regulation of mitotic nuclear division	18	1.7561	1.834e-09	STIL, ZWILCH, PLK1, CDCA8, AURKB, NDC80, CDC20, MTBP, CENPE, CCNB1, NUF2, BIRC5, KNTC1, SPDL1, TRIP13, BUB1, SPC24, SPC25	838	68	20051	6.33367	1.20915e-05	7.79983e-08	7.13012e-08
GOTERM_BP_FAT	GO:0006935~chemotaxis	62	6.04878	1.86695e-09	RIPOR2, LAMC2, TREM3, CXCL15, TNFSF11, CCR8, IL12A, CCR7, CTSG, EAR1, CCR6, PLXNC1, CCR4, CCR3, GPR35, ITGA2, MST1, RHOH, RUNX3, GREM1, TIAM1, CH25H, JAML, RNASE2A, IL1B, PADI2, ADAM8, RTN4R, CX3CR1, SEMA3D, LEF1, FPR1, CXCR5, NOD2, GATA3, TRPM2, CNR2, CXCR2, SPP1, SLAMF8, STAP1, CCL17, SLAMF1, EAR6, NTRK1, GM10591, EGR2, XCR1, CCL22, EGR3, BCL11B, TNFSF14, SEMA4F, L1CAM, ITGB2L, NR4A3, SELL, 261…	838	642	20051	2.31073	1.23087e-05	7.88904e-08	7.21167e-08
GOTERM_BP_FAT	GO:0051304~chromosome separation	25	2.43902	1.99529e-09	TOP2A, ZWILCH, CDCA8, NCAPG, AURKB, CDC20, MTBP, CCNB1, NUF2, KNTC1, SPDL1, BUB1, STIL, UBE2C, PLK1, CDC6, NDC80, CENPE, ESPL1, TACC3, BIRC5, TRIP13, SPC24, SPC25, CENPS	838	136	20051	4.39838	1.31548e-05	8.37766e-08	7.65834e-08
GOTERM_BP_FAT	GO:0033045~regulation of sister chromatid segregation	24	2.34146	2.1837e-09	RMI2, STIL, UBE2C, ZWILCH, CDCA5, DDX11, PLK1, CDCA8, CDC6, AURKB, NDC80, CDC20, MTBP, CENPE, CCNB1, NUF2, TACC3, BIRC5, KNTC1, SPDL1, TRIP13, BUB1, SPC24, SPC25	838	126	20051	4.55756	1.4397e-05	9.11072e-08	8.32846e-08
GOTERM_BP_FAT	GO:0042330~taxis	62	6.04878	2.49659e-09	RIPOR2, LAMC2, TREM3, CXCL15, TNFSF11, CCR8, IL12A, CCR7, CTSG, EAR1, CCR6, PLXNC1, CCR4, CCR3, GPR35, ITGA2, MST1, RHOH, RUNX3, GREM1, TIAM1, CH25H, JAML, RNASE2A, IL1B, PADI2, ADAM8, RTN4R, CX3CR1, SEMA3D, LEF1, FPR1, CXCR5, NOD2, GATA3, TRPM2, CNR2, CXCR2, SPP1, SLAMF8, STAP1, CCL17, SLAMF1, EAR6, NTRK1, GM10591, EGR2, XCR1, CCL22, EGR3, BCL11B, TNFSF14, SEMA4F, L1CAM, ITGB2L, NR4A3, SELL, 261…	838	647	20051	2.29287	1.64599e-05	1.03506e-07	9.46193e-08
GOTERM_BP_FAT	GO:0010965~regulation of mitotic sister chromatid separation	21	2.04878	2.68838e-09	STIL, UBE2C, ZWILCH, PLK1, CDCA8, CDC6, AURKB, NDC80, CDC20, MTBP, CENPE, CCNB1, NUF2, TACC3, BIRC5, KNTC1, SPDL1, TRIP13, BUB1, SPC24, SPC25	838	97	20051	5.18012	1.77243e-05	1.10761e-07	1.01251e-07
GOTERM_BP_FAT	GO:0001909~leukocyte mediated cytotoxicity	28	2.73171	2.90192e-09	CX3CR1, H2-M2, PRF1, H2-Q2, TREM3, RASGRP1, KLRB1C, IL18RAP, KLRK1, KLRB1F, STAP1, SLAMF6, IL12A, CTSG, KLRC1, KLRI1, HAVCR2, H60B, CD160, SH2D1A, GZMB, UNC13D, F2RL1, KLRD1, CD226, IL7R, ULBP1, DNASE1L3	838	172	20051	3.89513	1.91322e-05	1.18817e-07	1.08615e-07
GOTERM_BP_FAT	GO:1902107~positive regulation of leukocyte differentiation	32	3.12195	3.33522e-09	BLM, GPR68, LEF1, GATA3, PRKCZ, RASGRP1, TNF, TESPA1, MYB, TNFSF11, EVI2, IL12A, CCR7, CARMIL2, EGR3, TESC, RHOH, FOXP3, RUNX3, RUNX1, ZAP70, IL1A, CD4, CD40LG, LCK, IL1B, CD27, ADAM8, IL7R, TOX, NFKBID, CD101	838	221	20051	3.46457	2.19889e-05	1.35715e-07	1.24062e-07
GOTERM_BP_FAT	GO:0046635~positive regulation of alpha-beta T cell activation	19	1.85366	3.83094e-09	BLM, CD160, CD80, PTPN22, RASAL3, CD3E, PRKCZ, RUNX3, FOXP3, RUNX1, ZAP70, MYB, CD28, CCR7, CD244A, IL12A, IL12RB1, NFKBID, CARD11	838	80	20051	5.68271	2.5257e-05	1.5493e-07	1.41627e-07
GOTERM_BP_FAT	GO:0044784~metaphase/anaphase transition of cell cycle	21	2.04878	3.9118e-09	STIL, UBE2C, ZWILCH, PLK1, CDCA8, CDC6, AURKB, NDC80, CDC20, MTBP, CENPE, CCNB1, NUF2, TACC3, BIRC5, KNTC1, SPDL1, TRIP13, BUB1, SPC24, SPC25	838	99	20051	5.07547	2.57902e-05	1.57235e-07	1.43735e-07
GOTERM_BP_FAT	GO:0051306~mitotic sister chromatid separation	21	2.04878	4.70069e-09	STIL, UBE2C, ZWILCH, PLK1, CDCA8, CDC6, AURKB, NDC80, CDC20, MTBP, CENPE, CCNB1, NUF2, TACC3, BIRC5, KNTC1, SPDL1, TRIP13, BUB1, SPC24, SPC25	838	100	20051	5.02471	3.09912e-05	1.878e-07	1.71675e-07
GOTERM_BP_FAT	GO:0051784~negative regulation of nuclear division	19	1.85366	4.73566e-09	STIL, ZWILCH, PLK1, OSM, CDCA8, AURKB, NDC80, CDC20, MTBP, CENPE, CCNB1, NUF2, BIRC5, KNTC1, SPDL1, TRIP13, BUB1, SPC24, SPC25	838	81	20051	5.61255	3.12217e-05	1.88057e-07	1.7191e-07
GOTERM_BP_FAT	GO:0070665~positive regulation of leukocyte proliferation	27	2.63415	5.23634e-09	BLM, CD40, CD80, PTPN22, TNFRSF13C, CD3E, RASAL3, IL12A, CCR7, CD244A, IL12RB1, TNFRSF4, SLAMF1, HAVCR2, CARMIL2, ATAD5, PDCD1LG2, BTNL2, FOXP3, ZAP70, IL1A, CD4, CD40LG, CD6, IL1B, CD28, CARD11	838	165	20051	3.91536	3.45226e-05	2.06694e-07	1.88947e-07
GOTERM_BP_FAT	GO:0099024~plasma membrane invagination	35	3.41463	5.52662e-09	IGHV1-5, IGHV3-5, IGHV3-4, IGHV2-5, IGHV5-2, IGHV1-20, IGHV1-43, IGHV1-66, IGHV1-47, AURKB, STAP1, IGHV8-5, TRDC, HAVCR1, IGHV7-4, IGHV2-9, IGHV5-6, IGHV1-62-2, IGHV1-62-3, IGHV5-12, IGHV1-31, ITGA2, IGHV1-54, IGHV1-34, RHOH, IGHV5-15, IGHV1-37, IGHV1-19, MARCO, IGHV14-1, IGHV12-3, IGHV15-2, TREML4, F2RL1, IGHE	838	264	20051	3.17217	3.64363e-05	2.16854e-07	1.98235e-07
GOTERM_BP_FAT	GO:0030071~regulation of mitotic metaphase/anaphase transition	20	1.95122	6.50766e-09	STIL, UBE2C, ZWILCH, PLK1, CDCA8, CDC6, AURKB, NDC80, CDC20, MTBP, CENPE, CCNB1, NUF2, BIRC5, KNTC1, SPDL1, TRIP13, BUB1, SPC24, SPC25	838	92	20051	5.20157	4.29041e-05	2.53837e-07	2.32043e-07
GOTERM_BP_FAT	GO:1905818~regulation of chromosome separation	22	2.14634	6.59101e-09	STIL, UBE2C, ZWILCH, PLK1, CDCA8, NCAPG, CDC6, AURKB, NDC80, CDC20, MTBP, CENPE, CCNB1, NUF2, TACC3, BIRC5, KNTC1, SPDL1, TRIP13, BUB1, SPC24, SPC25	838	112	20051	4.69999	4.34536e-05	2.55576e-07	2.33632e-07
GOTERM_BP_FAT	GO:0002274~myeloid leukocyte activation	35	3.41463	7.38706e-09	BLK, CX3CR1, MRGPRB1, CST7, RASGRP1, TNF, TSPAN32, RAB44, IL18RAP, KLRK1, CNR2, CXCR2, STAP1, CTSG, CD244A, HAVCR1, CD300LF, IL13RA2, SLAMF1, HAVCR2, RHOH, PRG3, UNC13D, BATF, FGR, ITGB2L, NR4A3, CAMK4, F2RL1, CD226, TLR6, ULBP1, HAMP, DNASE1L3, LAT	838	267	20051	3.13653	4.87017e-05	2.84769e-07	2.60318e-07
GOTERM_BP_FAT	GO:0045058~T cell selection	16	1.56098	7.69598e-09	BCL11B, THEMIS, CD3G, GATA3, CD3E, FOXP3, CD3D, BATF, ZAP70, CD4, TBX21, CD28, CCR7, SLAMF6, TOX, CARD11	838	57	20051	6.71641	5.07383e-05	2.94953e-07	2.69628e-07
GOTERM_MF_FAT	GO:0034987~immunoglobulin receptor binding	29	2.82927	8.10277e-09	IGHV1-5, IGHV3-5, IGHV3-4, IGHV2-5, IGHV5-2, IGHV1-20, IGHV1-43, IGHV1-66, IGHV1-47, IGHV8-5, TRDC, IGHV7-4, IGHV2-9, IGHV5-6, IGHV1-62-2, IGHV1-62-3, IGHV5-12, IGHV1-31, IGHV1-54, IGHV1-34, IGHV5-15, IGHV1-37, IGHV1-19, FGR, IGHV14-1, IGHV12-3, IGHV15-2, TARM1, IGHE	738	197	18102	3.61079	9.16419e-06	3.05474e-06	2.97372e-06
GOTERM_BP_FAT	GO:0006911~phagocytosis, engulfment	34	3.31707	8.19725e-09	IGHV1-5, IGHV3-5, IGHV3-4, IGHV2-5, IGHV5-2, IGHV1-20, IGHV1-43, IGHV1-66, IGHV1-47, STAP1, IGHV8-5, TRDC, HAVCR1, IGHV7-4, IGHV2-9, IGHV5-6, IGHV1-62-2, IGHV1-62-3, IGHV5-12, IGHV1-31, ITGA2, IGHV1-54, IGHV1-34, RHOH, IGHV5-15, IGHV1-37, IGHV1-19, MARCO, IGHV14-1, IGHV12-3, IGHV15-2, TREML4, F2RL1, IGHE	838	255	20051	3.19029	5.4043e-05	3.12348e-07	2.8553e-07
GOTERM_BP_FAT	GO:0035710~CD4-positive, alpha-beta T cell activation	23	2.2439	9.84078e-09	ARG2, CD160, LEF1, GATA3, CD3E, PRKCZ, RUNX3, FOXP3, BATF, RUNX1, CRACR2A, FUT7, TBX21, TARM1, MYB, CD28, CCR7, SLAMF6, IL12A, TOX, NFKBID, CARD11, IL18R1	838	125	20051	4.40261	6.48781e-05	3.72818e-07	3.40808e-07
GOTERM_BP_FAT	GO:0044772~mitotic cell cycle phase transition	48	4.68293	1.02674e-08	RNASEH2B, BLM, ZWILCH, CDCA5, CCNF, CDCA8, BRCA1, FOXM1, AURKB, CDC14A, ZC3H12D, CDC20, CCNB2, MTBP, CCNB1, MYB, NUF2, RBBP8, KNTC1, CLSPN, SPDL1, SKP2, BUB1, POLE, BARD1, MBD4, STIL, RRM2, UBE2C, CDKN2A, PLK1, CDC7, CDC6, HASPIN, NDC80, CCNA2, CENPE, CENPF, DBF4, CCNE2, SASS6, TACC3, CDK1, BIRC5, TRIP13, SPC24, TJP3, SPC25	838	454	20051	2.52975	6.76906e-05	3.86758e-07	3.5355e-07
GOTERM_BP_FAT	GO:0000226~microtubule cytoskeleton organization	60	5.85366	1.11709e-08	RIPOR2, PATJ, CCNF, BRCA1, KIF11, CDC14A, CDC20, NUF2, PCLAF, NUSAP1, MYBL2, RTTN, NEK2, SPDL1, NEFH, DLGAP5, GAS2L3, BORA, CEP295, CKAP2, KIF23, CCSAP, KNSTRN, KIF4, ASPM, ESPL1, SAPCD2, KIFC1, BIRC5, KIF2C, MNS1, KIF20A, RGS14, CDCA8, SLAIN1, CENPA, PRKCZ, AURKB, CCNB2, CCNB1, RACGAP1, HAUS8, FIGNL1, MAP7, STIL, SPAG5, PLK1, DCLK2, NDC80, TPX2, CENPE, KIF18B, CENPH, TTLL3, HOOK1, PRC1, SASS6, T…	838	641	20051	2.23968	7.36473e-05	4.18402e-07	3.82478e-07
GOTERM_BP_FAT	GO:1902099~regulation of metaphase/anaphase transition of cell cycle	20	1.95122	1.1386e-08	STIL, UBE2C, ZWILCH, PLK1, CDCA8, CDC6, AURKB, NDC80, CDC20, MTBP, CENPE, CCNB1, NUF2, BIRC5, KNTC1, SPDL1, TRIP13, BUB1, SPC24, SPC25	838	95	20051	5.03731	7.50654e-05	4.2405e-07	3.8764e-07
GOTERM_BP_FAT	GO:0010324~membrane invagination	35	3.41463	1.18686e-08	IGHV1-5, IGHV3-5, IGHV3-4, IGHV2-5, IGHV5-2, IGHV1-20, IGHV1-43, IGHV1-66, IGHV1-47, AURKB, STAP1, IGHV8-5, TRDC, HAVCR1, IGHV7-4, IGHV2-9, IGHV5-6, IGHV1-62-2, IGHV1-62-3, IGHV5-12, IGHV1-31, ITGA2, IGHV1-54, IGHV1-34, RHOH, IGHV5-15, IGHV1-37, IGHV1-19, MARCO, IGHV14-1, IGHV12-3, IGHV15-2, TREML4, F2RL1, IGHE	838	272	20051	3.07887	7.82465e-05	4.39537e-07	4.01798e-07
GOTERM_CC_FAT	GO:0001772~immunological synapse	15	1.46341	1.21091e-08	H2-EB2, CARMIL2, RHOH, CD3E, SCIMP, TRBV26, ZAP70, CRACR2A, CD6, LCK, CD28, SKAP1, CARD11, LAT, HAVCR2	743	48	16713	7.02936	8.28257e-06	1.03533e-06	9.80835e-07
GOTERM_BP_FAT	GO:0002819~regulation of adaptive immune response	33	3.21951	1.21619e-08	CD40, H2-M2, H2-Q2, NOD2, TNFRSF13C, GATA3, PRKCZ, SAMSN1, TNF, FUT7, TBX21, IL12A, CCR7, KLRC1, IL12RB1, SLAMF1, HAVCR2, CR2, ATAD5, CD160, FOXP3, CD4, CENPF, IL1B, CD28, LTA, KLRD1, CD226, FCER2A, IL7R, NFKBID, SKAP1, IL18R1	838	246	20051	3.20975	8.01803e-05	4.47885e-07	4.09428e-07
GOTERM_MF_FAT	GO:0016799~hydrolase activity, hydrolyzing N-glycosyl compounds	13	1.26829	1.37653e-08	MBD4, ART2A, ART2B, IL1RAP, DNPH1, UNG, NEIL3, IL18RAP, TLR12, TLR11, TLR6, IL18R1, TLR13	738	37	18102	8.61811	1.55684e-05	3.89214e-06	3.7889e-06
KEGG_PATHWAY	mmu05321:Inflammatory bowel disease	16	1.56098	1.45403e-08	H2-EB2, NOD2, GATA3, TNF, FOXP3, IL1A, IL18RAP, TBX21, IL1B, STAT4, IL21R, H2-OB, IL12A, H2-OA, IL12RB1, IL18R1	363	62	8998	6.39687	3.96949e-06	7.96807e-07	7.21198e-07
GOTERM_BP_FAT	GO:0046640~regulation of alpha-beta T cell proliferation	15	1.46341	1.76638e-08	ARG2, BLM, CD80, PTPN22, RASAL3, CD3E, FOXP3, ZAP70, TARM1, CD28, BTLA, CD244A, IL12A, IL12RB1, CARD11	838	52	20051	6.90208	0.000116451	6.46889e-07	5.91346e-07
KEGG_PATHWAY	mmu04660:T cell receptor signaling pathway	20	1.95122	2.12774e-08	ITK, CD8B1, CD3G, CD3E, TNF, CD3D, RASGRP1, MAPK13, ZAP70, CD4, CD40LG, CD8A, LCK, GRAP2, CD28, CTLA4, PDCD1, ICOS, CARD11, LAT	363	103	8998	4.81318	5.8087e-06	9.71666e-07	8.79464e-07
GOTERM_BP_FAT	GO:0002285~lymphocyte activation involved in immune response	31	3.02439	2.1784e-08	CD40, PGLYRP2, LEF1, GATA3, PRKCZ, UNG, CRACR2A, TBX21, CD19, MYB, ENPP1, SLAMF6, CCR7, CD244A, KLRC1, CCR6, HAVCR2, EOMES, ATAD5, CD160, FOXP3, AICDA, UNC13D, BATF, CD40LG, CD28, F2RL1, CLEC4E, NFKBID, IL18R1, GAPT	838	226	20051	3.28205	0.000143612	7.93372e-07	7.25252e-07
GOTERM_BP_FAT	GO:1901990~regulation of mitotic cell cycle phase transition	40	3.90244	2.20712e-08	RNASEH2B, BLM, ZWILCH, CDCA5, CDCA8, BRCA1, AURKB, CDC14A, ZC3H12D, CDC20, MTBP, CCNB1, NUF2, RBBP8, KNTC1, CLSPN, SPDL1, BUB1, BARD1, MBD4, STIL, RRM2, ATAD5, UBE2C, CDKN2A, PLK1, CDC7, CDC6, HASPIN, NDC80, CENPE, CENPF, DBF4, SASS6, CDK1, BIRC5, TRIP13, SPC24, TJP3, SPC25	838	348	20051	2.75025	0.000145505	7.99413e-07	7.30774e-07
GOTERM_BP_FAT	GO:0002228~natural killer cell mediated immunity	19	1.85366	2.29585e-08	CD96, H60B, CD160, SH2D1A, GZMB, RASGRP1, UNC13D, KLRB1C, IL18RAP, KLRK1, KLRB1F, CD226, KLRD1, SLAMF6, IL12A, KLRC1, ULBP1, KLRI1, HAVCR2	838	89	20051	5.10806	0.000151354	8.27007e-07	7.55999e-07
GOTERM_BP_FAT	GO:1901991~negative regulation of mitotic cell cycle phase transition	28	2.73171	2.30911e-08	BLM, ZWILCH, CDCA8, BRCA1, AURKB, ZC3H12D, CDC20, MTBP, CCNB1, NUF2, RBBP8, KNTC1, CLSPN, SPDL1, BUB1, BARD1, MBD4, STIL, PLK1, CDC6, HASPIN, NDC80, CENPE, CDK1, BIRC5, TRIP13, SPC24, SPC25	838	189	20051	3.54477	0.000152228	8.27262e-07	7.56232e-07
GOTERM_BP_FAT	GO:0051988~regulation of attachment of spindle microtubules to kinetochore	10	0.97561	2.33678e-08	CENPE, CCNB1, RACGAP1, SPAG5, CDCA8, BIRC5, NEK2, ECT2, KNSTRN, AURKB	838	19	20051	12.5933	0.000154052	8.32651e-07	7.61159e-07
GOTERM_BP_FAT	GO:2000106~regulation of leukocyte apoptotic process	22	2.14634	2.35908e-08	BLK, ARG2, FCMR, BLM, BCL11B, CDKN2A, CD3G, NOD2, SLC7A11, AURKB, HSH2D, NR4A3, CXCR2, CD27, CCR7, ADAM8, PDCD1, IL7R, BCL2A1A, NFKBID, TNFRSF4, IDO1	838	120	20051	4.38665	0.000155522	8.36078e-07	7.64291e-07
GOTERM_BP_FAT	GO:0010948~negative regulation of cell cycle process	33	3.21951	2.40035e-08	BLM, ZWILCH, CCNF, CDCA8, BRCA1, AURKB, ZC3H12D, CDC20, MTBP, CCNB1, NUF2, RBBP8, KNTC1, CLSPN, SPDL1, BUB1, E2F8, BARD1, MBD4, STIL, PLK1, OSM, CDC6, HASPIN, NDC80, CENPE, KIFC1, 2610528A11RIK, CDK1, BIRC5, TRIP13, SPC24, SPC25	838	253	20051	3.12094	0.000158243	8.46157e-07	7.73505e-07
GOTERM_BP_FAT	GO:0045954~positive regulation of natural killer cell mediated cytotoxicity	13	1.26829	2.57212e-08	CD160, SH2D1A, RASGRP1, KLRB1C, IL18RAP, KLRK1, CD226, KLRD1, SLAMF6, IL12A, KLRC1, ULBP1, KLRI1	838	38	20051	8.18562	0.000169566	9.01884e-07	8.24447e-07
GOTERM_BP_FAT	GO:0045582~positive regulation of T cell differentiation	23	2.2439	2.76395e-08	CARMIL2, BLM, EGR3, LEF1, RHOH, GATA3, PRKCZ, RUNX3, FOXP3, RASGRP1, RUNX1, ZAP70, IL1A, TESPA1, LCK, IL1B, MYB, CD27, CCR7, ADAM8, IL12A, IL7R, NFKBID	838	132	20051	4.16913	0.000182211	9.64019e-07	8.81247e-07
GOTERM_BP_FAT	GO:0002218~activation of innate immune response	31	3.02439	2.94439e-08	CD40, IFI213, IFI214, CGAS, PTPN22, OAS1C, NOD2, NLRC4, MEFV, TNF, FCNB, KLRK1, KLRC1, SLC15A3, CD300LF, KLRI1, OASL1, HAVCR2, IFI208, TASL, IFI206, SCIMP, TREML4, OAS3, TLR12, TLR11, F2RL1, KLRD1, TLR6, CLEC4E, TLR13	838	229	20051	3.23905	0.000194105	1.02155e-06	9.33836e-07
GOTERM_BP_FAT	GO:1901988~negative regulation of cell cycle phase transition	29	2.82927	3.43468e-08	BLM, ZWILCH, CDCA8, BRCA1, AURKB, ZC3H12D, CDC20, MTBP, CCNB1, NUF2, RBBP8, KNTC1, CLSPN, SPDL1, BUB1, BARD1, MBD4, STIL, PLK1, CDC6, HASPIN, NDC80, CENPE, 2610528A11RIK, CDK1, BIRC5, TRIP13, SPC24, SPC25	838	205	20051	3.38482	0.000226423	1.18541e-06	1.08363e-06
GOTERM_MF_FAT	GO:0001637~G-protein coupled chemoattractant receptor activity	11	1.07317	3.45973e-08	CX3CR1, XCR1, GPR35, CXCR2, CXCR5, ACKR4, CCR8, CCR7, CCR6, CCR4, CCR3	738	26	18102	10.3774	3.91288e-05	6.52159e-06	6.34861e-06
GOTERM_MF_FAT	GO:0004950~chemokine receptor activity	11	1.07317	3.45973e-08	CX3CR1, XCR1, GPR35, CXCR2, CXCR5, ACKR4, CCR8, CCR7, CCR6, CCR4, CCR3	738	26	18102	10.3774	3.91288e-05	6.52159e-06	6.34861e-06
GOTERM_BP_FAT	GO:0033047~regulation of mitotic sister chromatid segregation	21	2.04878	3.56605e-08	STIL, UBE2C, ZWILCH, PLK1, CDCA8, CDC6, AURKB, NDC80, CDC20, MTBP, CENPE, CCNB1, NUF2, TACC3, BIRC5, KNTC1, SPDL1, TRIP13, BUB1, SPC24, SPC25	838	112	20051	4.48635	0.000235082	1.22074e-06	1.11593e-06
GOTERM_BP_FAT	GO:0002455~humoral immune response mediated by circulating immunoglobulin	32	3.12195	3.57408e-08	IGHV1-5, IGHV3-5, IGHV3-4, IGHV2-5, IGHV5-2, IGHV1-20, IGHV1-43, IGHV1-66, IGHV1-47, NOD2, TNF, IGHV8-5, TRDC, IGHV7-4, IGHV2-9, IGHV5-6, IGHV1-62-2, CR2, IGHV1-62-3, IGHV5-12, IGHV1-31, IGHV1-54, IGHV1-34, IGHV5-15, IGHV1-37, IGHV1-19, IGHV14-1, IGHV12-3, IGHV15-2, LTA, IGHE, FCER2A	838	244	20051	3.13799	0.000235611	1.22074e-06	1.11593e-06
GOTERM_BP_FAT	GO:0034501~protein localization to kinetochore	10	0.97561	4.09128e-08	MTBP, ZWILCH, CDK1, KNTC1, SPDL1, KNL1, HASPIN, CENPQ, AURKB, NDC80	838	20	20051	11.9636	0.000269702	1.39019e-06	1.27083e-06
GOTERM_BP_FAT	GO:0044770~cell cycle phase transition	50	4.87805	4.4616e-08	ZWILCH, CCNF, BRCA1, FOXM1, CDC14A, ZC3H12D, CDC20, MTBP, NUF2, MYB, KNTC1, SPDL1, SKP2, POLE, HASPIN, CCNA2, DBF4, CCNE2, BIRC5, RNASEH2B, BLM, CDCA5, CDCA8, AURKB, CCNB2, CCNB1, RBBP8, CLSPN, BUB1, BARD1, MBD4, STIL, RRM2, ATAD5, UBE2C, CDKN2A, PLK1, CDC7, CDC6, NDC80, CENPE, CENPF, 2610528A11RIK, SASS6, TACC3, CDK1, TRIP13, SPC24, TJP3, SPC25	838	507	20051	2.35969	0.00029411	1.50825e-06	1.37875e-06
GOTERM_BP_FAT	GO:0045621~positive regulation of lymphocyte differentiation	24	2.34146	4.55552e-08	CARMIL2, BLM, EGR3, LEF1, RHOH, GATA3, PRKCZ, RUNX3, FOXP3, RASGRP1, RUNX1, ZAP70, IL1A, TESPA1, LCK, IL1B, MYB, CD27, CCR7, ADAM8, IL12A, TOX, IL7R, NFKBID	838	147	20051	3.90648	0.000300301	1.53214e-06	1.40059e-06
GOTERM_BP_FAT	GO:1903706~regulation of hemopoiesis	49	4.78049	4.58426e-08	PGLYRP2, GPR68, FLT3, PRDM1, TNF, IKZF3, MYB, GPR171, TNFSF11, CTLA4, IL12A, CCR7, H2-OA, TESC, RHOH, FOXP3, RUNX3, RUNX1, IL1A, ZAP70, LCK, IL1B, ADAM8, TOX, CD101, CARD11, BLM, LEF1, DTX1, GATA3, PRKCZ, RASGRP1, TESPA1, TBX21, SLAMF8, EVI2, CARMIL2, EGR3, CDKN2A, TNFRSF9, GPR55, FANCA, CD4, CD40LG, CD28, CD27, CLEC2I, IL7R, NFKBID	838	492	20051	2.38299	0.000302195	1.53398e-06	1.40227e-06
GOTERM_MF_FAT	GO:0005102~receptor binding	129	12.5854	4.90124e-08	IL1RN, IGHV3-5, IGHV3-4, LY6I, ITGA2B, SLA, IL1RAP, TNF, CXCL15, FCNB, ENPP1, TNFSF11, IL12A, CD244A, IGHV7-4, RNF43, BTN1A1, KLRA17, IGHV1-19, TIAM1, JAML, PADI2, CD226, ADAM8, RTN4R, BLK, H2-M2, IGHV1-66, FPR1, DTX1, TGFA, GATA3, CCNB1, KLRK1, TESPA1, MAP7, STAP1, IGHV8-5, TRDC, CD300LF, FGF23, WNT4, GM10591, H2-EB2, ITPRID1, TNFSF14, VDR, CD160, IL36G, BTNL2, PILRA, L1CAM, MARCO, ITGB2L, IGHV1…	738	1973	18102	1.60374	5.54315e-05	7.919e-06	7.70895e-06
GOTERM_BP_FAT	GO:0002717~positive regulation of natural killer cell mediated immunity	13	1.26829	4.91392e-08	CD160, SH2D1A, RASGRP1, KLRB1C, IL18RAP, KLRK1, CD226, KLRD1, SLAMF6, IL12A, KLRC1, ULBP1, KLRI1	838	40	20051	7.77634	0.000323922	1.62777e-06	1.488e-06
GOTERM_BP_FAT	GO:0033081~regulation of T cell differentiation in thymus	13	1.26829	4.91392e-08	BLM, EGR3, CDKN2A, TNFRSF9, FOXP3, RASGRP1, IL1A, TESPA1, IL1B, ADAM8, TOX, IL7R, NFKBID	838	40	20051	7.77634	0.000323922	1.62777e-06	1.488e-06
GOTERM_BP_FAT	GO:0032814~regulation of natural killer cell activation	15	1.46341	4.96189e-08	PGLYRP2, CD160, PTPN22, PRDM1, RASGRP1, FGR, SLAMF7, KLRD1, CD244A, IL12A, KLRC1, IL12RB1, TOX, ULBP1, HAVCR2	838	56	20051	6.40907	0.000327084	1.63544e-06	1.49502e-06
GOTERM_BP_FAT	GO:0050868~negative regulation of T cell activation	23	2.2439	5.52207e-08	RIPOR2, ARG2, CDKN2A, CD80, BTN1A1, DTX1, PTPN22, PDCD1LG2, RUNX3, LAX1, FOXP3, TSPAN32, RUNX1, ZC3H12D, TBX21, TARM1, BTLA, CTLA4, CTSG, TIGIT, NFKBID, HAVCR2, IDO1	838	137	20051	4.01698	0.000364003	1.81102e-06	1.65552e-06
GOTERM_BP_FAT	GO:0031341~regulation of cell killing	24	2.34146	5.89347e-08	CX3CR1, CD160, H2-M2, SH2D1A, PRF1, H2-Q2, RASGRP1, KLRB1C, IL18RAP, KLRK1, KLRB1F, F2RL1, STAP1, CD226, KLRD1, SLAMF6, FCER2A, IL12A, KLRC1, IL7R, DNASE1L3, ULBP1, KLRI1, HAVCR2	838	149	20051	3.85405	0.000388481	1.92325e-06	1.75812e-06
GOTERM_BP_FAT	GO:0046633~alpha-beta T cell proliferation	15	1.46341	6.32682e-08	ARG2, BLM, CD80, PTPN22, RASAL3, CD3E, FOXP3, ZAP70, TARM1, CD28, BTLA, CD244A, IL12A, IL12RB1, CARD11	838	57	20051	6.29663	0.000417041	2.0545e-06	1.8781e-06
GOTERM_BP_FAT	GO:0050856~regulation of T cell receptor signaling pathway	14	1.36585	6.9359e-08	PVRIG, CD160, TRAT1, SH2D1A, PTPN22, BTNL2, SLA2, TESPA1, LCK, CD226, CCR7, UBASH3A, KCNN4, CARD11	838	49	20051	6.83635	0.000457179	2.24125e-06	2.04881e-06
GOTERM_BP_FAT	GO:1903038~negative regulation of leukocyte cell-cell adhesion	24	2.34146	7.58743e-08	RIPOR2, ARG2, CDKN2A, CD80, BTN1A1, DTX1, PTPN22, PDCD1LG2, RUNX3, LAX1, FOXP3, TSPAN32, RUNX1, ZC3H12D, TBX21, TARM1, BTLA, CTLA4, CTSG, ADAM8, TIGIT, NFKBID, HAVCR2, IDO1	838	151	20051	3.803	0.000500114	2.43982e-06	2.23033e-06
GOTERM_BP_FAT	GO:0022408~negative regulation of cell-cell adhesion	29	2.82927	7.88045e-08	RIPOR2, IL1RN, CD80, LEF1, DTX1, PTPN22, TSPAN32, ZC3H12D, CDH1, EPCAM, TBX21, BTLA, CTLA4, CTSG, TIGIT, HAVCR2, ARG2, CDKN2A, BTN1A1, FGG, PDCD1LG2, FOXP3, RUNX3, LAX1, RUNX1, TARM1, ADAM8, NFKBID, IDO1	838	213	20051	3.25769	0.000519423	2.52174e-06	2.30522e-06
GOTERM_BP_FAT	GO:0001910~regulation of leukocyte mediated cytotoxicity	22	2.14634	8.66648e-08	CX3CR1, CD160, H2-M2, SH2D1A, H2-Q2, RASGRP1, KLRB1C, IL18RAP, KLRK1, KLRB1F, F2RL1, STAP1, CD226, KLRD1, SLAMF6, IL12A, KLRC1, IL7R, DNASE1L3, ULBP1, KLRI1, HAVCR2	838	129	20051	4.08061	0.000571218	2.75988e-06	2.52291e-06
GOTERM_BP_FAT	GO:0019221~cytokine-mediated signaling pathway	45	4.39024	8.85128e-08	LILRA6, CX3CR1, IL1RN, FLT3, TXK, GFI1, IL5RA, OAS1C, TNFRSF13C, IL1RAP, TNF, TRBV13-2, CXCL15, IL18RAP, CXCR2, IL21R, STAT4, STAP1, TNFRSF17, TNFSF11, CD300LF, IL12RB1, IL13RA2, CCL17, OASL1, GM10591, CCL22, PIRA13, GPR35, IL1R2, PIRA12, OSM, IL36G, IFNLR1, TRAF1, IL1A, CD4, NAIP6, OAS3, IL1B, PADI2, F2RL1, IL7R, IL9R, IL18R1	838	441	20051	2.44155	0.000583394	2.80517e-06	2.56432e-06
GOTERM_BP_FAT	GO:0071459~protein localization to chromosome, centromeric region	11	1.07317	1.00767e-07	MTBP, ZWILCH, CDK1, KNTC1, SPDL1, KNL1, HASPIN, CENPQ, CENPA, AURKB, NDC80	838	28	20051	9.39997	0.000664133	3.1645e-06	2.89279e-06
GOTERM_BP_FAT	GO:0002715~regulation of natural killer cell mediated immunity	16	1.56098	1.00811e-07	CD96, CD160, SH2D1A, RASGRP1, KLRB1C, IL18RAP, KLRK1, KLRB1F, CD226, KLRD1, SLAMF6, IL12A, KLRC1, ULBP1, KLRI1, HAVCR2	838	68	20051	5.62993	0.000664424	3.1645e-06	2.89279e-06
GOTERM_BP_FAT	GO:0030101~natural killer cell activation	21	2.04878	1.01856e-07	PGLYRP2, CD160, PTPN22, PRDM1, GATA3, RASGRP1, UNC13D, FGR, ITGB2L, KLRB1C, KLRK1, SLAMF6, CD244A, IL12A, KLRC1, IL12RB1, TOX, ULBP1, IL18R1, SLAMF1, HAVCR2	838	119	20051	4.22245	0.000671308	3.18214e-06	2.90892e-06
GOTERM_CC_FAT	GO:0042571~immunoglobulin complex, circulating	28	2.73171	1.0883e-07	IGHV1-5, IGHV3-5, IGHV3-4, IGHV2-5, IGHV5-2, IGHV1-20, IGHV1-43, IGHV1-66, IGHV1-47, IGHV8-5, TRDC, IGKV3-10, IGHV7-4, IGHV2-9, IGHV5-6, IGHV1-62-2, IGHV1-62-3, IGHV5-12, IGHV1-31, IGHV1-54, IGHV1-34, IGHV5-15, IGHV1-37, IGHV1-19, IGHV14-1, IGHV12-3, IGHV15-2, IGHE	743	192	16713	3.28037	7.44368e-05	8.27106e-06	7.83574e-06
GOTERM_BP_FAT	GO:0045786~negative regulation of cell cycle	42	4.09756	1.09772e-07	RNASEH2B, BLM, ZWILCH, CCNF, CDCA8, BRCA1, GATA3, TNF, AURKB, ZC3H12D, CDC20, MTBP, CCNB1, NUF2, PBK, RBBP8, KNTC1, CLSPN, SPDL1, BUB1, E2F8, BARD1, MBD4, STIL, CDKN2A, PLK1, OSM, CDC6, PROX1, HASPIN, RUNX3, NDC80, CENPE, RAD51, KIFC1, 2610528A11RIK, CDK1, BIRC5, TRIP13, DNA2, SPC24, SPC25	838	399	20051	2.51865	0.000723464	3.41328e-06	3.12021e-06
GOTERM_BP_FAT	GO:0002822~regulation of adaptive immune response based on somatic recombination of immune receptors built from immunoglobulin superfamily domains	30	2.92683	1.15978e-07	CD40, H2-M2, H2-Q2, NOD2, TNFRSF13C, GATA3, PRKCZ, TNF, FUT7, TBX21, IL12A, CCR7, KLRC1, IL12RB1, SLAMF1, HAVCR2, CR2, ATAD5, FOXP3, CD4, CENPF, IL1B, CD28, LTA, KLRD1, CD226, FCER2A, IL7R, NFKBID, IL18R1	838	230	20051	3.12094	0.000764348	3.58932e-06	3.28113e-06
GOTERM_CC_FAT	GO:0098687~chromosomal region	41	4	1.22847e-07	TOP2A, PIF1, ERCC6L, BLM, ZWILCH, CDCA8, NCAPG, MKI67, CENPA, NSL1, AURKB, RAD51AP1, MTBP, CCNB1, DSN1, NUF2, NEK2, KNTC1, SPDL1, BUB1, WDHD1, HELLS, SPAG5, PLK1, KNL1, KNSTRN, NDC80, CENPE, CENPF, RAD51, CENPH, CENPL, CENPM, BIRC5, KIF2C, CENPN, DNA2, CENPQ, SPC24, SPC25, CENPS	743	364	16713	2.53366	8.4024e-05	8.40275e-06	7.9605e-06
GOTERM_BP_FAT	GO:1901987~regulation of cell cycle phase transition	41	4	1.34262e-07	RNASEH2B, BLM, ZWILCH, CDCA5, CDCA8, BRCA1, AURKB, CDC14A, ZC3H12D, CDC20, MTBP, CCNB1, NUF2, RBBP8, KNTC1, CLSPN, SPDL1, BUB1, BARD1, MBD4, STIL, RRM2, ATAD5, UBE2C, CDKN2A, PLK1, CDC7, CDC6, HASPIN, NDC80, CENPE, CENPF, DBF4, SASS6, 2610528A11RIK, CDK1, BIRC5, TRIP13, SPC24, TJP3, SPC25	838	387	20051	2.53492	0.0008848	4.13578e-06	3.78068e-06
GOTERM_BP_FAT	GO:0002381~immunoglobulin production involved in immunoglobulin mediated immune response	17	1.65854	1.35087e-07	H2-EB2, CD40, ATAD5, NOD2, POU2F2, FOXP3, AICDA, BATF, UNG, CD40LG, TBX21, CD28, H2-OB, ENPP1, CCR6, H2-OA, GAPT	838	79	20051	5.14889	0.000890231	4.14183e-06	3.7862e-06
GOTERM_BP_FAT	GO:0097529~myeloid leukocyte migration	31	3.02439	1.36095e-07	CX3CR1, RIPOR2, NOD2, TREM3, EPX, FUT4, CXCL15, FUT7, CXCR2, SPP1, SLAMF8, STAP1, ENPP1, TNFSF11, CCR7, CTSG, CCL17, CCR3, SLAMF1, GM10591, CCL22, GPR35, MST1, MCOLN2, GREM1, IL1A, ITGB2L, JAML, SELL, IL1B, ADAM8	838	245	20051	3.02752	0.000896875	4.15343e-06	3.79681e-06
KEGG_PATHWAY	mmu05332:Graft-versus-host disease	15	1.46341	1.40699e-07	H2-EB2, CD80, H2-M2, PRF1, GZMB, H2-Q2, H2-T-PS, TNF, IL1A, IL1B, CD28, H2-OB, KLRD1, KLRC1, H2-OA	363	63	8998	5.90188	3.841e-05	5.50735e-06	4.98476e-06
GOTERM_BP_FAT	GO:0051231~spindle elongation	8	0.780488	1.42015e-07	RACGAP1, PRC1, CDCA8, BIRC5, KIF23, KIF11, AURKB, KIF4	838	12	20051	15.9515	0.000935864	4.30901e-06	3.93903e-06
GOTERM_BP_FAT	GO:0006910~phagocytosis, recognition	28	2.73171	1.42501e-07	IGHV1-5, IGHV3-5, IGHV3-4, IGHV2-5, IGHV5-2, IGHV1-20, IGHV1-43, IGHV1-66, IGHV1-47, FCNB, IGHV8-5, TRDC, IGHV7-4, IGHV2-9, IGHV5-6, IGHV1-62-2, IGHV1-62-3, IGHV5-12, IGHV1-31, IGHV1-54, IGHV1-34, IGHV5-15, IGHV1-37, IGHV1-19, IGHV14-1, IGHV12-3, IGHV15-2, IGHE	838	206	20051	3.25224	0.000939065	4.30901e-06	3.93903e-06
KEGG_PATHWAY	mmu04659:Th17 cell differentiation	19	1.85366	1.62461e-07	H2-EB2, CD3G, IL1RAP, GATA3, CD3E, FOXP3, CD3D, RUNX1, MAPK13, ZAP70, CD4, LCK, TBX21, IL1B, IL21R, H2-OB, H2-OA, IL12RB1, LAT	363	105	8998	4.48543	4.43509e-05	5.56429e-06	5.03629e-06
KEGG_PATHWAY	mmu04061:Viral protein interaction with cytokine and cytokine receptor	18	1.7561	1.89149e-07	GM10591, CX3CR1, CCL22, XCR1, TNFSF14, CXCR5, TNF, IL18RAP, CXCR2, LTA, ACKR4, CCR8, CCR7, CCR6, CCR4, CCL17, CCR3, IL18R1	363	95	8998	4.69665	5.16363e-05	5.75853e-06	5.2121e-06
GOTERM_BP_FAT	GO:2001251~negative regulation of chromosome organization	25	2.43902	1.93595e-07	TOP2A, PIF1, ZWILCH, CDCA8, BRCA1, AURKB, CDC20, MTBP, CCNB1, NUF2, KNTC1, SPDL1, BUB1, STIL, PLK1, ATAD2, PAX5, FOXP3, AICDA, NDC80, CENPE, BIRC5, TRIP13, SPC24, SPC25	838	171	20051	3.49813	0.00127556	5.8273e-06	5.32696e-06
GOTERM_BP_FAT	GO:0042267~natural killer cell mediated cytotoxicity	17	1.65854	1.94617e-07	H60B, CD160, SH2D1A, GZMB, RASGRP1, UNC13D, KLRB1C, IL18RAP, KLRK1, CD226, KLRD1, SLAMF6, IL12A, KLRC1, ULBP1, KLRI1, HAVCR2	838	81	20051	5.02176	0.00128229	5.83144e-06	5.33074e-06
GOTERM_CC_FAT	GO:0000779~condensed chromosome, centromeric region	13	1.26829	2.31296e-07	PLK1, NCAPG, CENPA, NSL1, AURKB, NDC80, CENPE, CENPF, DSN1, CCNB1, SPDL1, CENPQ, BUB1	743	43	16713	6.80049	0.000158194	1.43824e-05	1.36255e-05
GOTERM_BP_FAT	GO:0002685~regulation of leukocyte migration	30	2.92683	2.65495e-07	CX3CR1, RIPOR2, ITGA2B, PTPN22, NOD2, FUT4, FUT7, CXCR2, SLAMF8, STAP1, IL12A, MADCAM1, CCR7, CCR6, SLAMF1, TNFSF14, ITGA2, MST1, RHOH, GCSAM, GREM1, IL1A, SELL, IL1B, 2610528A11RIK, PADI2, F2RL1, ADAM8, GPR18, CHST2	838	239	20051	3.00342	0.00174888	7.91921e-06	7.23925e-06
GOTERM_CC_FAT	GO:0044421~extracellular region part	162	15.8049	2.68863e-07	FCGBP, IL1RN, IGHV3-5, IGHV3-4, IGKV4-90, ITGA2B, PRF1, CSN3, EPX, MPO, TNF, CXCL15, VPREB3, FCNB, ENPP1, TNFSF11, IL12A, FAM3D, PRSS8, GGT1, IGHV7-4, IGKV4-86, DDX11, IGKV6-29, KCTD1, RUNX1, IGHV1-19, ARC, CHIL1, KIF20A, KIF20B, CSTDC4, EMID1, IGKV4-74, IGKV5-45, KLK1, H2-M2, IGHV1-66, TACSTD2, TGFA, CDCA8, APOL7E, STFA2L1, APOL7C, SERPINA3F, IGKV9-123, IGKV9-129, IGHV8-5, IGKV4-69, TRDC, WFDC18…	743	2491	16713	1.46287	0.000183885	1.53252e-05	1.45186e-05
GOTERM_BP_FAT	GO:1903708~positive regulation of hemopoiesis	32	3.12195	2.7957e-07	BLM, GPR68, LEF1, GATA3, PRKCZ, RASGRP1, TNF, TESPA1, MYB, TNFSF11, EVI2, IL12A, CCR7, CARMIL2, EGR3, TESC, RHOH, FOXP3, RUNX3, RUNX1, ZAP70, IL1A, CD4, CD40LG, LCK, IL1B, CD27, ADAM8, IL7R, TOX, NFKBID, CD101	838	267	20051	2.86768	0.00184151	8.30148e-06	7.5887e-06
GOTERM_BP_FAT	GO:0046641~positive regulation of alpha-beta T cell proliferation	11	1.07317	3.03853e-07	ZAP70, BLM, CD80, CD28, CD244A, PTPN22, IL12A, RASAL3, IL12RB1, CD3E, CARD11	838	31	20051	8.4903	0.0020013	8.98206e-06	8.21084e-06
GOTERM_MF_FAT	GO:0016493~C-C chemokine receptor activity	10	0.97561	3.32555e-07	CX3CR1, XCR1, CXCR2, CXCR5, ACKR4, CCR8, CCR7, CCR6, CCR4, CCR3	738	25	18102	9.81138	0.000376048	4.1791e-05	4.06825e-05
GOTERM_MF_FAT	GO:0019957~C-C chemokine binding	10	0.97561	3.32555e-07	CX3CR1, XCR1, CXCR2, CXCR5, ACKR4, CCR8, CCR7, CCR6, CCR4, CCR3	738	25	18102	9.81138	0.000376048	4.1791e-05	4.06825e-05
GOTERM_BP_FAT	GO:0008037~cell recognition	37	3.60976	3.39516e-07	IGHV1-5, LY6K, IGHV3-5, IGHV3-4, IGHV2-5, IGHV5-2, IGHV1-20, IGHV1-43, PRF1, IGHV1-66, IGHV1-47, FCNB, IGHV8-5, TRDC, CCR7, IGHV7-4, HAVCR2, IGHV2-9, IGHV5-6, IGHV1-62-2, IGHV1-62-3, IGHV5-12, IGHV1-31, IGHV1-54, IGHV1-34, IGHV5-15, IZUMO1R, L1CAM, IGHV1-37, IGHV1-19, IGHV14-1, IGHV12-3, CD6, IGHV15-2, IGHE, CLEC2I, CDK5R1	838	341	20051	2.59621	0.00223593	9.99148e-06	9.1336e-06
KEGG_PATHWAY	mmu04658:Th1 and Th2 cell differentiation	17	1.65854	3.47002e-07	H2-EB2, CD3G, GATA3, CD3E, RUNX3, CD3D, MAPK13, ZAP70, CD4, LCK, TBX21, STAT4, H2-OB, IL12A, H2-OA, IL12RB1, LAT	363	88	8998	4.78857	9.47271e-05	9.50785e-06	8.60565e-06
GOTERM_BP_FAT	GO:0042269~regulation of natural killer cell mediated cytotoxicity	15	1.46341	3.67653e-07	CD160, SH2D1A, RASGRP1, KLRB1C, IL18RAP, KLRK1, KLRB1F, CD226, KLRD1, SLAMF6, IL12A, KLRC1, ULBP1, KLRI1, HAVCR2	838	65	20051	5.52166	0.002421	1.07714e-05	9.84657e-06
GOTERM_BP_FAT	GO:0031343~positive regulation of cell killing	19	1.85366	3.75179e-07	CD160, H2-M2, SH2D1A, PRF1, H2-Q2, RASGRP1, KLRB1C, IL18RAP, KLRK1, F2RL1, STAP1, CD226, KLRD1, SLAMF6, FCER2A, IL12A, KLRC1, ULBP1, KLRI1	838	106	20051	4.28884	0.0024705	1.09433e-05	1.00037e-05
GOTERM_BP_FAT	GO:0051256~mitotic spindle midzone assembly	7	0.682927	3.91955e-07	RACGAP1, PRC1, CDCA8, BIRC5, KIF23, AURKB, KIF4	838	9	20051	18.6101	0.00258082	1.13822e-05	1.04049e-05
GOTERM_BP_FAT	GO:0031295~T cell costimulation	11	1.07317	4.25492e-07	TNFSF14, CD160, CD5, CD80, CD28, CCR7, TNFRSF13C, PDCD1LG2, CD3E, ICOS, CARD11	838	32	20051	8.22498	0.00280134	1.23019e-05	1.12457e-05
GOTERM_BP_FAT	GO:0051383~kinetochore organization	9	0.878049	4.47326e-07	CENPE, CENPH, NUF2, KNTC1, CENPN, CENPA, DLGAP5, NDC80, CENPS	838	19	20051	11.3339	0.00294487	1.28207e-05	1.17199e-05
GOTERM_BP_FAT	GO:0033089~positive regulation of T cell differentiation in thymus	9	0.878049	4.47326e-07	IL1A, BLM, EGR3, TESPA1, IL1B, ADAM8, IL7R, FOXP3, RASGRP1	838	19	20051	11.3339	0.00294487	1.28207e-05	1.17199e-05
GOTERM_CC_FAT	GO:0000777~condensed chromosome kinetochore	10	0.97561	4.57694e-07	CENPE, CENPF, DSN1, CCNB1, PLK1, SPDL1, CENPQ, CENPA, NSL1, NDC80	743	24	16713	9.37248	0.000313014	2.40818e-05	2.28143e-05
GOTERM_BP_FAT	GO:0042127~regulation of cell proliferation	123	12	5.2308e-07	RIPOR2, CD80, PRDM1, TNF, IKZF3, TGM1, ZC3H12D, CDC20, MTBP, CDH1, IL12A, CD244A, SKP2, TNFRSF4, BTN1A1, IFT80, RUNX3, FOXP3, RUNX2, RUNX1, TIAM1, CLDN3, JAML, SPINT1, CLDN7, KIF20B, TOX, CARD11, IDO1, BLK, RNASEH2B, BLM, SHOX2, CDCA7, TACSTD2, TGFA, GATA3, RASAL3, PRKCZ, CCNB1, BTLA, PMAIP1, FGF23, SLAMF1, NFE2, TFAP2B, CARMIL2, EGR3, BCL11B, VDR, ST8SIA1, TNFRSF9, FANCA, EAF2, CDC7, CDC6, BTNL2…	838	1881	20051	1.56462	0.00344273	1.4927e-05	1.36454e-05
KEGG_PATHWAY	mmu04940:Type I diabetes mellitus	15	1.46341	5.6267e-07	H2-EB2, CD80, H2-M2, PRF1, GZMB, H2-Q2, H2-T-PS, TNF, IL1A, IL1B, LTA, CD28, H2-OB, IL12A, H2-OA	363	70	8998	5.31169	0.000153597	1.40156e-05	1.26857e-05
GOTERM_MF_FAT	GO:0003953~NAD+ nucleosidase activity	9	0.878049	5.92513e-07	IL18RAP, TLR12, ART2A, ART2B, TLR11, IL1RAP, TLR6, IL18R1, TLR13	738	20	18102	11.0378	0.000669908	6.70132e-05	6.52357e-05
GOTERM_BP_FAT	GO:0032633~interleukin-4 production	12	1.17073	6.28965e-07	ITK, CD40LG, TXK, LEF1, CD28, IL1RAP, GATA3, CD3E, EPX, FOXP3, PRKCZ, HAVCR2	838	41	20051	7.00309	0.00413818	1.78713e-05	1.63368e-05
GOTERM_BP_FAT	GO:0002821~positive regulation of adaptive immune response	24	2.34146	6.72812e-07	CD40, ATAD5, H2-M2, H2-Q2, NOD2, TNFRSF13C, GATA3, TNF, PRKCZ, FOXP3, CD4, TBX21, IL1B, LTA, CD28, CD226, CCR7, FCER2A, IL12A, IL12RB1, NFKBID, SKAP1, IL18R1, SLAMF1	838	170	20051	3.37796	0.00442603	1.90351e-05	1.74007e-05
GOTERM_BP_FAT	GO:0072376~protein activation cascade	32	3.12195	6.81538e-07	IGHV1-5, IGHV3-5, IGHV3-4, IGHV2-5, IGHV5-2, IGHV1-20, IGHV1-43, IGHV1-66, IGHV1-47, FCNB, IGHV8-5, TRDC, IGHV7-4, IGHV2-9, IGHV5-6, IGHV1-62-2, CR2, IGHV1-62-3, IGHV5-12, IGHV1-31, IGHV1-54, FGG, IGHV1-34, IGHV5-15, IGHV1-37, IGHV1-19, F8, IGHV14-1, IGHV12-3, IGHV15-2, IL1B, IGHE	838	278	20051	2.75421	0.0044833	1.91996e-05	1.7551e-05
KEGG_PATHWAY	mmu04672:Intestinal immune network for IgA production	12	1.17073	6.92993e-07	H2-EB2, CD40, CD40LG, CD80, CD28, H2-OB, TNFRSF17, MADCAM1, TNFRSF13C, H2-OA, ICOS, AICDA	363	43	8998	6.91755	0.000189169	1.58233e-05	1.43219e-05
GOTERM_BP_FAT	GO:0019722~calcium-mediated signaling	27	2.63415	7.41185e-07	CX3CR1, CXCR5, CD3E, SLA2, TNF, SIGLECG, TRPM2, ERBB3, CXCR2, TBC1D10C, CCR8, TNFSF11, CCR7, CCR6, CCR4, CCR3, XCR1, TRAT1, BHLHA15, L1CAM, ZAP70, CD4, CD8A, ACKR4, HAP1, CD22, LAT	838	210	20051	3.07636	0.00487471	2.0791e-05	1.90059e-05
GOTERM_BP_FAT	GO:0006956~complement activation	30	2.92683	7.45701e-07	IGHV1-5, IGHV3-5, IGHV3-4, IGHV2-5, IGHV5-2, IGHV1-20, IGHV1-43, IGHV1-66, IGHV1-47, FCNB, IGHV8-5, TRDC, IGHV7-4, IGHV2-9, IGHV5-6, IGHV1-62-2, CR2, IGHV1-62-3, IGHV5-12, IGHV1-31, IGHV1-54, IGHV1-34, IGHV5-15, IGHV1-37, IGHV1-19, IGHV14-1, IGHV12-3, IGHV15-2, IL1B, IGHE	838	251	20051	2.85983	0.00490434	2.08291e-05	1.90407e-05
GOTERM_BP_FAT	GO:0051092~positive regulation of NF-kappaB transcription factor activity	23	2.2439	7.95126e-07	NTRK1, CX3CR1, CD40, TRIM30B, TRIM30C, RIPK4, NOD2, NLRC4, TRAF1, IL1RAP, TNF, PRKCZ, GREM1, ITGB2L, IL18RAP, CD40LG, IL1B, TNFRSF8, TNFSF11, ADAM8, TLR6, CARD11, IL18R1	838	159	20051	3.46117	0.00522855	2.21159e-05	2.0217e-05
GOTERM_CC_FAT	GO:0000922~spindle pole	25	2.43902	8.74894e-07	RGS14, KIF11, AURKB, CDC14A, CDC20, CCNB1, HAUS8, NEK2, KNTC1, SPDL1, DLGAP5, SPAG5, CKAP2L, DDX11, PLK1, CKAP2, CDC6, KNSTRN, ASPM, TPX2, CENPF, KIFC1, PRC1, TACC3, KIF20B	743	175	16713	3.21342	0.000598249	4.27448e-05	4.04951e-05
GOTERM_BP_FAT	GO:0000022~mitotic spindle elongation	7	0.682927	9.45143e-07	RACGAP1, PRC1, CDCA8, BIRC5, KIF23, AURKB, KIF4	838	10	20051	16.749	0.00621196	2.61781e-05	2.39304e-05
GOTERM_MF_FAT	GO:0008017~microtubule binding	31	3.02439	9.51669e-07	RGS14, KIF11, KIF15, RACGAP1, HAUS8, NUSAP1, GTSE1, DLGAP5, GAS2L3, SPAG5, CEP295, PLK1, DCLK2, KIF23, KIF22, CCSAP, KNSTRN, KIF4, CENPE, TIAM1, TPX2, CENPF, KIF18B, HOOK1, KIFC1, PRC1, BIRC5, KIF2C, KIF20A, KIF20B, SPC24	738	275	18102	2.76503	0.00107576	9.78489e-05	9.52534e-05
GOTERM_BP_FAT	GO:0000281~mitotic cytokinesis	15	1.46341	9.59659e-07	PLK1, CKAP2, CDCA8, KIF23, CENPA, AURKB, KIF4, RACGAP1, NUSAP1, TRIM36, BIRC5, KIF20A, KIF20B, ECT2, CEP55	838	70	20051	5.12726	0.00630706	2.64689e-05	2.41963e-05
KEGG_PATHWAY	mmu05330:Allograft rejection	14	1.36585	9.83285e-07	H2-EB2, CD40, CD80, H2-M2, PRF1, GZMB, H2-Q2, H2-T-PS, TNF, CD40LG, CD28, H2-OB, IL12A, H2-OA	363	63	8998	5.50842	0.000268401	2.07246e-05	1.8758e-05
GOTERM_BP_FAT	GO:0031294~lymphocyte costimulation	11	1.07317	1.08046e-06	TNFSF14, CD160, CD5, CD80, CD28, CCR7, TNFRSF13C, PDCD1LG2, CD3E, ICOS, CARD11	838	35	20051	7.51998	0.00709814	2.96765e-05	2.71284e-05
GOTERM_BP_FAT	GO:0006958~complement activation, classical pathway	28	2.73171	1.10356e-06	IGHV1-5, IGHV3-5, IGHV3-4, IGHV2-5, IGHV5-2, IGHV1-20, IGHV1-43, IGHV1-66, IGHV1-47, IGHV8-5, TRDC, IGHV7-4, IGHV2-9, IGHV5-6, IGHV1-62-2, CR2, IGHV1-62-3, IGHV5-12, IGHV1-31, IGHV1-54, IGHV1-34, IGHV5-15, IGHV1-37, IGHV1-19, IGHV14-1, IGHV12-3, IGHV15-2, IGHE	838	228	20051	2.93843	0.00724934	3.01852e-05	2.75935e-05
GOTERM_BP_FAT	GO:0090307~mitotic spindle assembly	13	1.26829	1.14409e-06	CDCA8, KIF23, KIF11, AURKB, KIF4, CDC20, TPX2, RACGAP1, KIFC1, PRC1, BIRC5, MYBL2, NEK2	838	52	20051	5.9818	0.00751461	3.11646e-05	2.84888e-05
GOTERM_BP_FAT	GO:0002367~cytokine production involved in immune response	22	2.14634	1.15893e-06	CD96, CD160, NOD2, TREM3, GATA3, EPX, TNF, PRKCZ, SCIMP, FOXP3, RASGRP1, PANX1, CENPF, NR4A3, IL18RAP, TBX21, IL1B, F2RL1, CD226, IL12A, IL18R1, SLAMF1	838	150	20051	3.50932	0.00761172	3.1439e-05	2.87396e-05
GOTERM_BP_FAT	GO:0007017~microtubule-based process	68	6.63415	1.21226e-06	RIPOR2, PATJ, CCNF, BRCA1, KIF11, CDC14A, KIF15, CDC20, NUF2, PCLAF, NUSAP1, MYBL2, RTTN, NEK2, SPDL1, NEFH, DLGAP5, GAS2L3, BORA, CEP295, CKAP2, RFX3, KIF23, IFT80, KIF22, CCSAP, KNSTRN, KIF4, ASPM, ESPL1, SAPCD2, KIFC1, BIRC5, KIF2C, HAP1, MNS1, KIF20A, KIF20B, RGS14, CDCA8, SLAIN1, CENPA, PRKCZ, RASGRP1, AURKB, CCNB2, CCNB1, RACGAP1, HAUS8, FIGNL1, MAP7, STIL, SPAG5, PLK1, DCLK2, NDC80, TPX2, …	838	875	20051	1.85949	0.00796059	3.2657e-05	2.9853e-05
GOTERM_BP_FAT	GO:0045930~negative regulation of mitotic cell cycle	30	2.92683	1.21374e-06	BLM, ZWILCH, CDCA8, BRCA1, TNF, AURKB, ZC3H12D, CDC20, MTBP, CCNB1, NUF2, PBK, RBBP8, KNTC1, CLSPN, SPDL1, BUB1, BARD1, MBD4, STIL, PLK1, CDC6, HASPIN, NDC80, CENPE, CDK1, BIRC5, TRIP13, SPC24, SPC25	838	257	20051	2.79306	0.00797025	3.2657e-05	2.9853e-05
GOTERM_BP_FAT	GO:0002824~positive regulation of adaptive immune response based on somatic recombination of immune receptors built from immunoglobulin superfamily domains	23	2.2439	1.22003e-06	CD40, ATAD5, H2-M2, H2-Q2, NOD2, TNFRSF13C, GATA3, TNF, PRKCZ, FOXP3, CD4, TBX21, IL1B, LTA, CD28, CD226, CCR7, FCER2A, IL12A, IL12RB1, NFKBID, IL18R1, SLAMF1	838	163	20051	3.37623	0.00801143	3.26929e-05	2.98859e-05
GOTERM_CC_FAT	GO:0031617~NMS complex	7	0.682927	1.35244e-06	DSN1, NUF2, KNL1, NSL1, SPC24, NDC80, SPC25	743	10	16713	15.7458	0.00092464	6.16711e-05	5.84253e-05
GOTERM_BP_FAT	GO:0008608~attachment of spindle microtubules to kinetochore	11	1.07317	1.44032e-06	CENPE, CCNB1, NUF2, CDCA8, BIRC5, KIF2C, KNL1, SPC24, AURKB, NDC80, SPC25	838	36	20051	7.31109	0.00945108	3.84396e-05	3.51391e-05
GOTERM_BP_FAT	GO:0001912~positive regulation of leukocyte mediated cytotoxicity	17	1.65854	1.60127e-06	CD160, H2-M2, SH2D1A, H2-Q2, RASGRP1, KLRB1C, IL18RAP, KLRK1, F2RL1, STAP1, CD226, KLRD1, SLAMF6, IL12A, KLRC1, ULBP1, KLRI1	838	94	20051	4.32726	0.0105017	4.25628e-05	3.89083e-05
GOTERM_BP_FAT	GO:0007162~negative regulation of cell adhesion	34	3.31707	1.6388e-06	RIPOR2, IL1RN, CD80, LEF1, TACSTD2, DTX1, PTPN22, TSPAN32, ZC3H12D, ERBB3, CDH1, EPCAM, TBX21, BTLA, CTLA4, CTSG, PLXNC1, TIGIT, HAVCR2, ARG2, CDKN2A, BTN1A1, FGG, PDCD1LG2, PLET1, FOXP3, RUNX3, LAX1, RUNX1, TARM1, CLDN7, ADAM8, NFKBID, IDO1	838	319	20051	2.55024	0.0107465	4.33855e-05	3.96604e-05
GOTERM_BP_FAT	GO:0097530~granulocyte migration	23	2.2439	1.66526e-06	GM10591, RIPOR2, CCL22, NOD2, TREM3, EPX, MCOLN2, FUT4, CXCL15, IL1A, ITGB2L, FUT7, JAML, SELL, IL1B, CXCR2, SPP1, SLAMF8, CCR7, ADAM8, CCL17, CCR3, SLAMF1	838	166	20051	3.31522	0.010919	4.39096e-05	4.01394e-05
GOTERM_BP_FAT	GO:0006260~DNA replication	29	2.82927	1.68637e-06	PIF1, BLM, PRIM1, TONSL, MCM10, NUGGC, CHAF1B, CHAF1A, PCLAF, POLE, E2F8, WDHD1, RMI2, RRM2, ATAD5, DDX11, GINS3, CDC7, CDC6, ADRA2A, AICDA, MMS22L, DBF4, RAD51, CCNE2, POLE2, CDK1, DNA2, CENPS	838	247	20051	2.80927	0.0110567	4.42891e-05	4.04864e-05
GOTERM_BP_FAT	GO:0000910~cytokinesis	22	2.14634	1.79098e-06	PLK1, MRGPRB1, CXCR5, CKAP2, CDCA8, KIF23, SEPTIN3, CDC6, CENPA, AURKB, CDC14A, KIF4, RACGAP1, PRC1, NUSAP1, TRIM36, BIRC5, KIF20A, KIF20B, ECT2, CEP55, E2F8	838	154	20051	3.41817	0.0117385	4.64808e-05	4.24899e-05
GOTERM_BP_FAT	GO:0071887~leukocyte apoptotic process	22	2.14634	1.79098e-06	BLK, ARG2, FCMR, BLM, BCL11B, CDKN2A, CD3G, NOD2, SLC7A11, AURKB, HSH2D, NR4A3, CXCR2, CD27, CCR7, ADAM8, PDCD1, IL7R, BCL2A1A, NFKBID, TNFRSF4, IDO1	838	154	20051	3.41817	0.0117385	4.64808e-05	4.24899e-05
GOTERM_BP_FAT	GO:0044839~cell cycle G2/M phase transition	22	2.14634	1.79098e-06	BARD1, MBD4, RNASEH2B, BLM, ATAD5, CDKN2A, PLK1, CDC7, CDC6, BRCA1, FOXM1, AURKB, NDC80, CCNA2, CCNB2, CENPF, CCNB1, CDK1, RBBP8, BIRC5, CLSPN, SKP2	838	154	20051	3.41817	0.0117385	4.64808e-05	4.24899e-05
GOTERM_BP_FAT	GO:0002758~innate immune response-activating signal transduction	25	2.43902	1.81291e-06	CD40, PTPN22, OAS1C, NOD2, MEFV, TNF, FCNB, KLRK1, KLRC1, SLC15A3, CD300LF, KLRI1, OASL1, HAVCR2, TASL, SCIMP, TREML4, OAS3, TLR12, TLR11, F2RL1, KLRD1, TLR6, CLEC4E, TLR13	838	193	20051	3.09938	0.0118814	4.68656e-05	4.28417e-05
GOTERM_BP_FAT	GO:0001906~cell killing	32	3.12195	1.95211e-06	CX3CR1, H2-M2, PRF1, H2-Q2, TREM3, RASGRP1, KLRB1C, IL18RAP, KLRK1, KLRB1F, STAP1, SLAMF6, IL12A, CTSG, KLRC1, CCL17, KLRI1, HAVCR2, H60B, CCL22, CD160, SH2D1A, GZMB, UNC13D, F2RL1, KLRD1, CD226, FCER2A, IL7R, ULBP1, HAMP, DNASE1L3	838	292	20051	2.62216	0.0127878	5.02667e-05	4.59508e-05
GOTERM_BP_FAT	GO:0070228~regulation of lymphocyte apoptotic process	16	1.56098	2.10961e-06	BLK, ARG2, FCMR, BLM, BCL11B, CD3G, AURKB, HSH2D, CD27, ADAM8, PDCD1, IL7R, BCL2A1A, NFKBID, TNFRSF4, IDO1	838	85	20051	4.50394	0.0138124	5.4111e-05	4.94649e-05
GOTERM_MF_FAT	GO:0019955~cytokine binding	21	2.04878	2.20022e-06	CX3CR1, IL1RN, XCR1, IL1R2, TNFRSF9, CXCR5, IL5RA, GREM1, CD4, CXCR2, ACKR4, CCR8, CCR7, IL12A, CCR6, IL12RB1, IL13RA2, CCR4, CCR3, IL9R, IL18R1	738	147	18102	3.50407	0.00248536	0.000207371	0.000201871
GOTERM_BP_FAT	GO:0051310~metaphase plate congression	14	1.36585	2.338e-06	CDCA5, CDCA8, KIF22, AURKB, NDC80, CENPE, CENPF, CCNB1, KIFC1, NUF2, BIRC5, KIF2C, SPDL1, CENPQ	838	65	20051	5.15355	0.0152962	5.97367e-05	5.46076e-05
GOTERM_BP_FAT	GO:0002702~positive regulation of production of molecular mediator of immune response	21	2.04878	2.62231e-06	CD40, ATAD5, CD160, PTPN22, NOD2, GATA3, PRKCZ, SCIMP, PANX1, NR4A3, TBX21, IL1B, CD28, MZB1, F2RL1, CD27, CD226, CD244A, TNFRSF4, IL18R1, SLAMF1	838	145	20051	3.46532	0.0171403	6.67424e-05	6.10118e-05
GOTERM_BP_FAT	GO:0008284~positive regulation of cell proliferation	80	7.80488	2.73917e-06	CD40, CD80, LAMC2, PTPN22, TNFRSF13C, FOXM1, CD3E, TNF, TGM1, CDC20, ITGAX, IL12A, CD244A, CCR7, SKP2, TNFRSF4, CCR3, HAVCR2, ITGA2, MST1, CIP2A, PROX1, PDCD1LG2, FOXP3, RUNX2, CCNA2, GREM1, ASPM, IL1A, TIAM1, ZAP70, SAPCD2, JAML, IL1B, CLDN7, MZB1, LTA, SINHCAF, KIF20B, TOX, CARD11, CX3CR1, RNASEH2B, BLM, LEF1, SHOX2, TGFA, NOD2, RASAL3, PRKCZ, CCNB1, ERBB3, RAB25, EPCAM, CXCR2, IL12RB1, FGF23, …	838	1115	20051	1.71675	0.0178973	6.94486e-05	6.34856e-05
GOTERM_BP_FAT	GO:0002507~tolerance induction	10	0.97561	3.24493e-06	BLK, CCR7, PDCD1, CD3E, ICOS, FOXP3, CCR4, HAVCR2, RUNX1, IDO1	838	31	20051	7.71845	0.0211666	8.19562e-05	7.49193e-05
GOTERM_BP_FAT	GO:0072676~lymphocyte migration	18	1.7561	3.45574e-06	GM10591, RIPOR2, CCL22, GPR15, TNFSF14, GCSAM, GATA3, FUT4, CH25H, FUT7, TBX21, 2610528A11RIK, PADI2, MADCAM1, CCR7, ADAM8, CCR6, CCL17	838	111	20051	3.88009	0.0225262	8.69476e-05	7.94821e-05
GOTERM_BP_FAT	GO:0046330~positive regulation of JNK cascade	21	2.04878	3.61472e-06	UNC5CL, IL1RN, NOD2, FZD10, TRAF1, TNF, RASGRP1, IL1A, TIAM1, CRACR2A, CD40LG, NAIP6, IL1B, F2RL1, CD27, TNFSF11, CCR7, MAP3K9, TLR6, TNIK, SLAMF1	838	148	20051	3.39508	0.0235501	9.06015e-05	8.28223e-05
GOTERM_BP_FAT	GO:1990266~neutrophil migration	20	1.95122	3.82785e-06	GM10591, RIPOR2, CCL22, NOD2, TREM3, MCOLN2, FUT4, CXCL15, IL1A, ITGB2L, FUT7, JAML, SELL, IL1B, CXCR2, SPP1, SLAMF8, CCR7, ADAM8, CCL17	838	136	20051	3.51871	0.0249213	9.55803e-05	8.73736e-05
GOTERM_BP_FAT	GO:0001818~negative regulation of cytokine production	32	3.12195	3.93643e-06	CX3CR1, PGLYRP2, FLT3, LEF1, PTPN22, NLRC3, OAS1C, NOD2, GATA3, MEFV, EPX, TNF, TBX21, IL12A, CCR7, FFAR1, TIGIT, TNFRSF4, SLAMF1, HAVCR2, CD96, ARG2, BTN1A1, IL1R2, PDCD1LG2, FOXP3, BANK1, OAS3, F2RL1, TLR6, GPR18, IDO1	838	302	20051	2.53533	0.0256191	9.79206e-05	8.9513e-05
GOTERM_BP_FAT	GO:0006261~DNA-dependent DNA replication	21	2.04878	4.01441e-06	WDHD1, BLM, ATAD5, PRIM1, GINS3, DDX11, TONSL, CDC7, MCM10, CDC6, NUGGC, AICDA, MMS22L, RAD51, DBF4, CCNE2, POLE2, DNA2, POLE, E2F8, CENPS	838	149	20051	3.37229	0.0261199	9.94849e-05	9.0943e-05
KEGG_PATHWAY	mmu04064:NF-kappa B signaling pathway	17	1.65854	4.016e-06	GM10591, CD40, TNFSF14, TRAF1, TNFRSF13C, TNF, ZAP70, CD40LG, LCK, IL1B, LTA, BLNK, TNFSF11, BCL2A1A, BCL2A1B, CARD11, LAT	363	105	8998	4.01328	0.00109577	7.85989e-05	7.11406e-05
GOTERM_BP_FAT	GO:0043368~positive T cell selection	11	1.07317	4.12736e-06	ZAP70, BCL11B, TBX21, THEMIS, CD3G, SLAMF6, CD3E, TOX, FOXP3, CD3D, BATF	838	40	20051	6.57998	0.0268449	0.000101901	9.31516e-05
GOTERM_BP_FAT	GO:0016477~cell migration	103	10.0488	4.18328e-06	RIPOR2, IL1RN, ITGA2B, EPX, CELSR1, TNF, CXCL15, CDH1, ENPP1, TNFSF11, IL12A, NANOS1, EOMES, KNSTRN, TIAM1, CH25H, ARC, CLDN4, DEPDC1B, CLDN3, JAML, PADI2, ADAM8, LMX1B, KIF20B, TACSTD2, GATA3, PRKCZ, FUT4, TRPM2, FUT7, SLAMF8, STAP1, SLAMF1, WNT4, GM10591, CARMIL1, CARMIL2, ST14, XCR1, GPR15, EGR3, BCL11B, TNFSF14, ARHGEF39, GCSAM, L1CAM, PLET1, DCLK1, ITGB2L, NR4A3, SELL, GPR18, CD40, PTPN22, L…	838	1566	20051	1.57376	0.0272035	0.000102896	9.40613e-05
GOTERM_BP_FAT	GO:2000514~regulation of CD4-positive, alpha-beta T cell activation	15	1.46341	4.36094e-06	ARG2, CD160, GATA3, CD3E, PRKCZ, RUNX3, FOXP3, RUNX1, TBX21, TARM1, MYB, CD28, CCR7, NFKBID, CARD11	838	79	20051	4.54314	0.0283423	0.000106867	9.76915e-05
GOTERM_BP_FAT	GO:0045931~positive regulation of mitotic cell cycle	24	2.34146	4.68405e-06	FOXA1, STIL, RRM2, UBE2C, CDCA5, TGFA, CDCA8, CDC7, TNF, AURKB, NDC80, MTBP, IL1A, CENPE, CCNB1, DBF4, IL1B, PBK, CD28, SASS6, NUSAP1, CDK1, BIRC5, KIF20B	838	190	20051	3.02238	0.03041	0.00011436	0.000104541
GOTERM_BP_FAT	GO:0032663~regulation of interleukin-2 production	14	1.36585	4.71685e-06	CARMIL2, NOD2, BTNL2, GATA3, CD3E, FOXP3, RUNX1, IL1A, TBX21, IL1B, CD28, CLEC2I, CARD11, HAVCR2	838	69	20051	4.8548	0.0306197	0.000114736	0.000104885
GOTERM_BP_FAT	GO:2000107~negative regulation of leukocyte apoptotic process	15	1.46341	5.08546e-06	ARG2, FCMR, BLM, BCL11B, NOD2, AURKB, HSH2D, CXCR2, CD27, CCR7, PDCD1, IL7R, BCL2A1A, TNFRSF4, IDO1	838	80	20051	4.48635	0.0329727	0.000123248	0.000112665
GOTERM_CC_FAT	GO:0005615~extracellular space	139	13.561	5.09293e-06	FCGBP, IL1RN, IGHV3-5, IGHV3-4, IGKV4-90, PRF1, CSN3, EPX, MPO, TNF, CXCL15, VPREB3, FCNB, ENPP1, TNFSF11, IL12A, FAM3D, PRSS8, GGT1, IGHV7-4, IGKV4-86, IGKV6-29, IGHV1-19, CHIL1, CSTDC4, IGKV4-74, IGKV5-45, KLK1, H2-M2, IGHV1-66, TACSTD2, TGFA, APOL7E, STFA2L1, APOL7C, SERPINA3F, IGKV9-123, IGKV9-129, IGHV8-5, IGKV4-69, TRDC, WFDC18, IGKV3-12, IGKV3-10, FGF23, WNT4, GM10591, IGKV8-27, ST14, LRRN…	743	2164	16713	1.44485	0.00347751	0.000217723	0.000206264
GOTERM_BP_FAT	GO:0032101~regulation of response to external stimulus	68	6.63415	5.28671e-06	RIPOR2, PGLYRP2, CGAS, PTPN22, TNF, PBK, TNFSF11, IL12A, CCR7, CTSG, CCR6, GGT1, CCR4, OASL1, HAVCR2, ARG2, CR2, ITGA2, IL1R2, MST1, FGG, IFIT1BL1, FOXP3, IL17RB, GREM1, TIAM1, CLDN3, IL1B, LTA, PADI2, ADAM8, TLR6, DNASE1L3, IDO1, RTN4R, BLK, CX3CR1, SEMA3D, TXK, NLRC3, NOD2, GATA3, MEFV, TSPAN32, NT5E, FUT7, CNR2, CXCR2, SLAMF8, STAP1, IL12RB1, WNT4, SLAMF1, TNFSF14, VDR, FANCA, OSM, SEMA4F, IFN…	838	913	20051	1.78209	0.0342549	0.000127656	0.000116695
GOTERM_BP_FAT	GO:0002456~T cell mediated immunity	21	2.04878	6.04514e-06	H2-M2, PRF1, GZMB, H2-Q2, NOD2, GATA3, PRKCZ, FOXP3, CENPF, FUT7, IL18RAP, TREML4, CD8A, TBX21, IL1B, KLRD1, IL12A, KLRC1, IL7R, IL18R1, SLAMF1	838	153	20051	3.28413	0.0390719	0.000145436	0.000132949
GOTERM_MF_FAT	GO:0019956~chemokine binding	10	0.97561	6.14071e-06	CX3CR1, XCR1, CXCR2, CXCR5, ACKR4, CCR8, CCR7, CCR6, CCR4, CCR3	738	34	18102	7.21425	0.0069211	0.000534242	0.000520071
GOTERM_BP_FAT	GO:0006468~protein phosphorylation	124	12.0976	6.42848e-06	IL1RN, CD80, CCNF, FZD10, TNF, GRAP2, TBC1D10C, ENPP1, TNFSF11, IL12A, NEK2, MAP3K9, TNFRSF4, STK32C, UNC5CL, BORA, MATK, HASPIN, RUNX3, LAX1, TIAM1, MELK, CLDN3, CCNE2, NAIP6, CHIL1, ADAM8, TNIK, CDKL1, BLK, BLM, TXK, TGFA, CDCA8, LPAR2, PRDM11, PRKCZ, SAMSN1, RASGRP1, CCNB2, CRACR2A, CCNB1, NUAK2, STAP1, CLSPN, ECT2, FGF23, SLAMF1, PROM2, GM10591, STIL, LRRN3, PLK1, DCLK2, CDC7, CDC6, L1CAM, DC…	838	1999	20051	1.48423	0.0414975	0.000154097	0.000140866
GOTERM_CC_FAT	GO:0019814~immunoglobulin complex	30	2.92683	6.67924e-06	IGHV1-5, IGHV3-5, IGHV3-4, IGHV2-5, IGHV5-2, IGHV1-20, IGHV1-43, IGHV1-66, IGHV1-47, IGKV9-129, IGHV8-5, TRDC, IGKV3-10, IGKV7-33, IGHV7-4, IGHV2-9, IGHV5-6, IGHV1-62-2, IGHV1-62-3, IGHV5-12, IGHV1-31, IGHV1-54, IGHV1-34, IGHV5-15, IGHV1-37, IGHV1-19, IGHV14-1, IGHV12-3, IGHV15-2, IGHE	743	264	16713	2.55613	0.00455819	0.000268741	0.000254597
GOTERM_BP_FAT	GO:0043367~CD4-positive, alpha-beta T cell differentiation	16	1.56098	6.7172e-06	LEF1, GATA3, PRKCZ, RUNX3, FOXP3, BATF, RUNX1, CRACR2A, FUT7, TBX21, MYB, CCR7, SLAMF6, TOX, NFKBID, IL18R1	838	93	20051	4.11651	0.0433203	0.000160434	0.000146659
GOTERM_BP_FAT	GO:0051255~spindle midzone assembly	7	0.682927	6.93158e-06	RACGAP1, PRC1, CDCA8, BIRC5, KIF23, AURKB, KIF4	838	13	20051	12.8839	0.0446716	0.000164957	0.000150793
GOTERM_BP_FAT	GO:0048870~cell motility	115	11.2195	7.03254e-06	RIPOR2, LY6K, IL1RN, ITGA2B, EPX, CELSR1, TNF, CXCL15, CDH1, ENPP1, TNFSF11, IL12A, PLXNC1, NANOS1, EOMES, RFX3, KNSTRN, TIAM1, CH25H, ARC, CLDN4, DEPDC1B, CLDN3, JAML, CLDN7, PADI2, ADAM8, LMX1B, KIF20B, TACSTD2, GATA3, CACNA1E, PRKCZ, FUT4, TRPM2, CACNA1I, FUT7, SLAMF8, STAP1, FGF23, SLAMF1, WNT4, GM10591, CARMIL1, CARMIL2, ST14, XCR1, GPR15, EGR3, BCL11B, TNFSF14, ARHGEF39, GCSAM, L1CAM, PLET1…	838	1822	20051	1.51022	0.0453072	0.000166159	0.000151893
GOTERM_BP_FAT	GO:0051674~localization of cell	115	11.2195	7.03254e-06	RIPOR2, LY6K, IL1RN, ITGA2B, EPX, CELSR1, TNF, CXCL15, CDH1, ENPP1, TNFSF11, IL12A, PLXNC1, NANOS1, EOMES, RFX3, KNSTRN, TIAM1, CH25H, ARC, CLDN4, DEPDC1B, CLDN3, JAML, CLDN7, PADI2, ADAM8, LMX1B, KIF20B, TACSTD2, GATA3, CACNA1E, PRKCZ, FUT4, TRPM2, CACNA1I, FUT7, SLAMF8, STAP1, FGF23, SLAMF1, WNT4, GM10591, CARMIL1, CARMIL2, ST14, XCR1, GPR15, EGR3, BCL11B, TNFSF14, ARHGEF39, GCSAM, L1CAM, PLET1…	838	1822	20051	1.51022	0.0453072	0.000166159	0.000151893
GOTERM_BP_FAT	GO:0032673~regulation of interleukin-4 production	10	0.97561	7.54278e-06	CD40LG, LEF1, CD28, IL1RAP, GATA3, CD3E, EPX, FOXP3, PRKCZ, HAVCR2	838	34	20051	7.03741	0.0485135	0.000177579	0.000162331
GOTERM_BP_FAT	GO:0006897~endocytosis	66	6.43902	8.18874e-06	IGHV1-5, SIRPB1B, ACHE, SIRPB1A, IGHV3-5, IGHV3-4, IGHV5-2, IGHV1-43, LY75, STAB2, IGHV1-47, TNF, FCNB, CCR7, GM9733, HAVCR1, IGHV5-6, IGHV7-4, IGHV5-12, ITGA2, IGHV1-54, RHOH, IGHV5-15, UNC13D, GREM1, IGHV1-19, FGR, ARC, IGHV15-2, DNAJC6, IL1B, IGHE, RAB39, SIRPB1C, IGHV2-5, RAMP3, CEBPE, IGHV1-20, IGHV1-66, HMMR, NOD2, LRP8, FCHO1, CXCR2, STAP1, IGHV8-5, TRDC, CD300LF, PACSIN1, IGHV2-9, SLAMF1,…	838	889	20051	1.77637	0.0525571	0.0001921	0.000175606
GOTERM_BP_FAT	GO:0006959~humoral immune response	44	4.29268	8.61284e-06	IGHV1-5, IGHV3-5, IGHV3-4, IGHV2-5, IGHV5-2, IGHV1-20, IGHV1-43, IGHV1-66, IGHV1-47, NOD2, GATA3, TNF, CXCL15, WFDC2, FCNB, IGHV8-5, WFDC18, TRDC, CCR7, CTSG, CCL17, IGHV7-4, IGHV2-9, IGHV5-6, IGHV1-62-2, CR2, CCL22, IGHV1-62-3, IGHV5-12, IGHV1-31, IGHV1-54, SH2D1A, IGHV1-34, IGHV5-15, IGHV1-37, IGHV1-19, IGHV14-1, IGHV12-3, IGHV15-2, IL1B, LTA, IGHE, FCER2A, HAMP	838	506	20051	2.08063	0.0552025	0.000201333	0.000184046
GOTERM_BP_FAT	GO:0030888~regulation of B cell proliferation	14	1.36585	9.0255e-06	BLK, CD40, ATAD5, CDKN2A, TNFRSF13C, SIGLECG, IKZF3, CD40LG, MZB1, BTLA, CTLA4, TNFRSF4, CD22, CARD11	838	73	20051	4.58878	0.0577695	0.000209493	0.000191506
GOTERM_BP_FAT	GO:0032623~interleukin-2 production	14	1.36585	9.0255e-06	CARMIL2, NOD2, BTNL2, IL1RAP, GATA3, CD3E, FOXP3, RUNX1, IL1A, TBX21, IL1B, CD28, CARD11, HAVCR2	838	73	20051	4.58878	0.0577695	0.000209493	0.000191506
GOTERM_BP_FAT	GO:0006928~movement of cell or subcellular component	137	13.3659	9.12206e-06	RIPOR2, LY6K, IL1RN, ITGA2B, EPX, CELSR1, TNF, CXCL15, CDH1, ENPP1, TNFSF11, IL12A, PLXNC1, NANOS1, EOMES, RFX3, IFT80, RUNX3, KNSTRN, TIAM1, CH25H, ARC, CLDN4, DEPDC1B, CLDN3, JAML, CLDN7, PADI2, ADAM8, LMX1B, KIF20A, KIF20B, DSC2, RTN4R, TACSTD2, GATA3, CACNA1E, PRKCZ, RASGRP1, FUT4, TRPM2, CACNA1I, FUT7, SLAMF8, STAP1, FGF23, SLAMF1, WNT4, GM10591, CARMIL1, EGR2, CARMIL2, ST14, XCR1, GPR15, EG…	838	2277	20051	1.43963	0.0583692	0.000210992	0.000192876
GOTERM_BP_FAT	GO:0032753~positive regulation of interleukin-4 production	9	0.878049	9.75668e-06	CD40LG, CD28, IL1RAP, GATA3, CD3E, EPX, FOXP3, PRKCZ, HAVCR2	838	27	20051	7.97574	0.0623008	0.000224881	0.000205573
GOTERM_BP_FAT	GO:0061640~cytoskeleton-dependent cytokinesis	16	1.56098	1.00136e-05	PLK1, CKAP2, CDCA8, KIF23, SEPTIN3, CENPA, AURKB, KIF4, RACGAP1, NUSAP1, TRIM36, BIRC5, KIF20A, KIF20B, ECT2, CEP55	838	96	20051	3.98787	0.0638877	0.000229998	0.00021025
GOTERM_BP_FAT	GO:0002437~inflammatory response to antigenic stimulus	15	1.46341	1.05606e-05	IL1RN, IL5RA, IL36G, NOD2, GATA3, TNF, RASGRP1, RAB44, FUT7, CD6, CXCR2, LTA, CD28, ENPP1, CCR7	838	85	20051	4.22245	0.067258	0.000241721	0.000220967
GOTERM_CC_FAT	GO:0005576~extracellular region	184	17.9512	1.07393e-05	FCGBP, LY6K, IL1RN, IGHV3-5, ADAMDEC1, IGHV3-4, PGLYRP2, IGKV4-90, ITGA2B, PRF1, CSN3, IL1RAP, EPX, MPO, TNF, CXCL15, VPREB3, FCNB, ENDOU, ENPP1, TNFSF11, IL12A, FAM3D, PRSS8, GGT1, IL13RA2, IGHV7-4, IGKV4-86, IL1R2, DDX11, IGKV6-29, RFX3, KCTD1, RUNX1, IGHV1-19, ARC, SNORC, SPINT1, CHIL1, KIF20A, KIF20B, CSTDC4, EMID1, DSC3, IGKV4-74, IGKV5-45, KLK1, H2-M2, IGHV1-66, TACSTD2, TGFA, CDCA8, APOL7E…	743	3087	16713	1.34075	0.00731881	0.000408093	0.000386615
GOTERM_BP_FAT	GO:0007080~mitotic metaphase plate congression	12	1.17073	1.16045e-05	CENPE, CCNB1, KIFC1, CDCA5, NUF2, CDCA8, BIRC5, KIF2C, SPDL1, KIF22, AURKB, NDC80	838	54	20051	5.31716	0.0736554	0.000264695	0.000241968
GOTERM_BP_FAT	GO:0051382~kinetochore assembly	7	0.682927	1.17015e-05	CENPE, CENPH, KNTC1, CENPN, CENPA, DLGAP5, CENPS	838	14	20051	11.9636	0.0742473	0.000265986	0.000243148
GOTERM_BP_FAT	GO:0001932~regulation of protein phosphorylation	100	9.7561	1.17578e-05	IL1RN, CD80, CCNF, FZD10, TNF, GRAP2, TBC1D10C, ENPP1, TNFSF11, IL12A, MAP3K9, TNFRSF4, UNC5CL, BORA, LAX1, TIAM1, CLDN3, CCNE2, NAIP6, CHIL1, ADAM8, TNIK, BLM, TGFA, CDCA8, LPAR2, PRDM11, PRKCZ, SAMSN1, RASGRP1, CCNB2, CRACR2A, CCNB1, STAP1, CLSPN, ECT2, FGF23, SLAMF1, PROM2, GM10591, STIL, LRRN3, PLK1, CDC6, L1CAM, MARCO, PKIB, TPX2, ITGB2L, CD27, LAT, CD40, FLT3, PTPN22, FOXM1, CD3E, PBK, CCR7…	838	1546	20051	1.54768	0.0745913	0.000266349	0.00024348
GOTERM_CC_FAT	GO:0043235~receptor complex	42	4.09756	1.19837e-05	VIPR1, CD40, RAMP3, TRBV19, FLT3, ITGA2B, IL5RA, CD3G, CD3E, LRP8, CD3D, TSPAN32, IL18RAP, ERBB3, ITGAX, IL12A, KLRC1, PLXNC1, IL12RB1, IL13RA2, NTRK1, ARNT2, TRGV1, CR2, FCRL5, VDR, TRAT1, ITGA2, CD8B1, IFNLR1, TRAF1, SCIMP, ADRA2A, ZAP70, ITGB2L, CD6, CD8A, KLRD1, TLR6, KCNK1, SKAP1, IL18R1	743	452	16713	2.09015	0.0081634	0.000431413	0.000408707
GOTERM_BP_FAT	GO:1902622~regulation of neutrophil migration	12	1.17073	1.39638e-05	RIPOR2, IL1A, FUT7, SELL, IL1B, CXCR2, SLAMF8, RHOH, CCR7, ADAM8, NOD2, FUT4	838	55	20051	5.22048	0.087953	0.000315237	0.00028817
GOTERM_BP_FAT	GO:0042100~B cell proliferation	18	1.7561	1.41449e-05	BLK, CR2, CD40, ATAD5, CDKN2A, LEF1, TNFRSF13C, RASGRP1, CD40LG, CD19, BTLA, CD27, CTLA4, IL7R, TNFRSF4, IL9R, CARD11, GAPT	838	123	20051	3.50154	0.0890416	0.000318236	0.000290912
GOTERM_BP_FAT	GO:0032674~regulation of interleukin-5 production	8	0.780488	1.49836e-05	LEF1, IL5RA, IL1RAP, GATA3, EPX, FOXP3, PRKCZ, IL17RB	838	21	20051	9.11513	0.0940649	0.000335959	0.000307113
GOTERM_BP_FAT	GO:0050790~regulation of catalytic activity	122	11.9024	1.587e-05	RIPOR2, FCMR, IL1RN, GFI1, CCNF, FZD10, TNF, CDC20, CDH1, RGS1, TBC1D30, TBC1D10C, TNFSF11, NEK2, PLXNC1, MAP3K9, TNFRSF4, BORA, DDX11, LAX1, TIAM1, CLDN4, CLDN3, CCNE2, SPINT1, NAIP6, CHIL1, ADAM8, TNIK, CSTDC4, RTN4R, PIF1, BLM, TXK, TGFA, RASAL1, ARHGAP15, MEFV, RASAL3, PRKCZ, RASGRP1, STFA2L1, ARHGAP22, CCNB2, CCNB1, SERPINA3F, CD19, SLAMF8, PMAIP1, STAP1, WFDC18, CLSPN, ECT2, FGF23, SLAMF1, …	838	1996	20051	1.46248	0.099344	0.000354581	0.000324136
GOTERM_BP_FAT	GO:0002637~regulation of immunoglobulin production	15	1.46341	1.59217e-05	CD40, ATAD5, CGAS, TNF, FOXP3, SIGLECG, VPREB3, CD40LG, TBX21, CD28, MZB1, CD27, IL13RA2, TNFRSF4, CD22	838	88	20051	4.0785	0.0996509	0.000354581	0.000324136
GOTERM_BP_FAT	GO:0034097~response to cytokine	81	7.90244	1.72765e-05	RIPOR2, CD40, IL1RN, FLT3, IFI213, GFI1, IFI214, IL5RA, BRCA1, IL1RAP, TNFRSF13C, TNF, TRBV13-2, CXCL15, RAB43, SERPINA1B, IL18RAP, KYNU, MYB, TNFSF11, MYBL2, CCR7, GGT1, IL13RA2, NEFH, OASL1, 9930111J21RIK1, HELLS, GBP8, PIRA13, GPR35, IL1R2, PIRA12, FGG, TRAF1, SERPINA1E, IFIT1BL1, IL1A, CH25H, NAIP6, IL1B, OAS3, CHIL1, PADI2, IL9R, LILRA6, CX3CR1, TXK, LEF1, ILDR1, DTX1, OAS1C, GATA3, MEFV, SE…	838	1192	20051	1.62593	0.107657	0.000383456	0.000350532
GOTERM_BP_FAT	GO:0051302~regulation of cell division	24	2.34146	1.79141e-05	BLM, PLK1, MRGPRB1, CXCR5, TGFA, CDCA8, KIF23, CDC6, AURKB, CDC14A, IL1A, ASPM, KIF18B, RACGAP1, PRC1, IL1B, 2610528A11RIK, BIRC5, EVI2, KIF20A, KIF20B, ECT2, RAB11FIP4, E2F8	838	206	20051	2.78764	0.1114	0.000396274	0.000362249
GOTERM_BP_FAT	GO:0007010~cytoskeleton organization	97	9.46341	1.93497e-05	RIPOR2, PATJ, CCNF, FZD10, CELSR1, TNF, CDC14A, CDC20, POF1B, CDH1, NUSAP1, PCLAF, RTTN, NEK2, GAS2L3, BORA, KRT5, KNSTRN, ARC, CLDN3, TNIK, KIF20A, TACSTD2, CDCA8, SLAIN1, PRKCZ, TRPM2, CCNB2, CCNB1, NUAK2, RACGAP1, FIGNL1, MAP7, STAP1, VILL, ECT2, WNT4, PACSIN1, CARMIL1, CARMIL2, STIL, PLK1, DCLK2, NDC80, TPX2, BFSP2, KIF18B, PARVG, HOOK1, SASS6, BRCA1, KIF11, EPB41L4B, NUF2, MYBL2, CCR7, SPDL1…	838	1505	20051	1.54215	0.119772	0.0004266	0.000389972
GOTERM_BP_FAT	GO:0034113~heterotypic cell-cell adhesion	12	1.17073	1.99545e-05	DSP, IL1RN, ITGB2L, LCK, IL1B, FGG, ITGAX, MADCAM1, DSG2, TNF, DSC2, SKAP1	838	57	20051	5.03731	0.123275	0.000438467	0.00040082
GOTERM_BP_FAT	GO:1902533~positive regulation of intracellular signal transduction	78	7.60976	2.09224e-05	CD40, IL1RN, TRIM30B, TRIM30C, CGAS, PTPN22, FZD10, CD3E, TNF, GPR174, TNFSF11, IL12A, CCR7, MAP3K9, OASL1, HAVCR2, UNC5CL, GPR35, FGG, TRAF1, ADRA2A, GREM1, FGR, IL1A, TIAM1, ZAP70, NAIP6, RRAGB, LCK, BANK1, CD8A, IL1B, CHIL1, ADAM8, HAP1, TLR6, TNIK, CARD11, RTN4R, CX3CR1, RAMP3, TGFA, LPAR2, P2RY10B, NOD2, GATA3, PRKCZ, RASGRP1, CRACR2A, ERBB3, PMAIP1, IL12RB1, SLC15A3, FGF23, CCL17, BUB1, SLA…	838	1141	20051	1.63569	0.128851	0.000458207	0.000418865
GOTERM_BP_FAT	GO:0002292~T cell differentiation involved in immune response	14	1.36585	2.19219e-05	EOMES, LEF1, GATA3, PRKCZ, FOXP3, BATF, CRACR2A, TBX21, MYB, CCR7, SLAMF6, CLEC4E, NFKBID, IL18R1	838	79	20051	4.24026	0.134573	0.000478507	0.000437421
GOTERM_CC_FAT	GO:0098802~plasma membrane receptor complex	25	2.43902	2.31191e-05	CD40, RAMP3, TRBV19, ITGA2B, CD3G, CD3E, CD3D, TSPAN32, IL18RAP, ERBB3, ITGAX, IL12A, IL12RB1, TRGV1, TRAT1, ITGA2, IFNLR1, TRAF1, ZAP70, ITGB2L, CD6, TLR6, KCNK1, SKAP1, IL18R1	743	211	16713	2.66516	0.0156893	0.000790673	0.000749059
GOTERM_BP_FAT	GO:0070229~negative regulation of lymphocyte apoptotic process	12	1.17073	2.37057e-05	FCMR, BLM, HSH2D, ARG2, BCL11B, CD27, PDCD1, IL7R, BCL2A1A, TNFRSF4, AURKB, IDO1	838	58	20051	4.95046	0.144692	0.000515735	0.000471453
GOTERM_MF_FAT	GO:0023023~MHC protein complex binding	8	0.780488	2.49488e-05	H2-EB2, CD4, CD160, CD8A, H2-OB, KLRD1, KLRC1, H2-OA	738	23	18102	8.53164	0.0278231	0.00201551	0.00196205
GOTERM_BP_FAT	GO:0032874~positive regulation of stress-activated MAPK cascade	22	2.14634	2.50152e-05	UNC5CL, IL1RN, NOD2, FZD10, TRAF1, TNF, SCIMP, RASGRP1, IL1A, TIAM1, CRACR2A, CD40LG, NAIP6, IL1B, F2RL1, CD27, TNFSF11, CCR7, MAP3K9, TLR6, TNIK, SLAMF1	838	182	20051	2.8923	0.152045	0.000542435	0.000495861
GOTERM_BP_FAT	GO:0033044~regulation of chromosome organization	41	4	2.77133e-05	TOP2A, PIF1, ZWILCH, CDCA5, GFI1, CDCA8, NCAPG, BRCA1, GATA3, MKI67, AURKB, CDC20, MTBP, CCNB1, MYB, NUF2, NEK2, KNTC1, SPDL1, BUB1, WDHD1, RMI2, STIL, UBE2C, DDX11, PLK1, ATAD2, PAX5, CDC6, FOXP3, AICDA, NDC80, PKIB, CENPE, TACC3, BIRC5, PADI2, TRIP13, SPC24, SPC25, PHF19	838	480	20051	2.04378	0.166996	0.000598971	0.000547543
GOTERM_BP_FAT	GO:0002701~negative regulation of production of molecular mediator of immune response	11	1.07317	2.8469e-05	VPREB3, CD96, TBX21, NOD2, EPX, IL13RA2, FOXP3, SIGLECG, TNF, CD22, SLAMF1	838	49	20051	5.37141	0.171136	0.000613292	0.000560634
GOTERM_BP_FAT	GO:0002688~regulation of leukocyte chemotaxis	18	1.7561	2.94592e-05	CX3CR1, RIPOR2, TNFSF14, MST1, NOD2, GREM1, SELL, IL1B, CXCR2, SLAMF8, PADI2, F2RL1, STAP1, CCR7, IL12A, CCR6, GPR18, SLAMF1	838	130	20051	3.313	0.17653	0.000631193	0.000576997
GOTERM_BP_FAT	GO:0070304~positive regulation of stress-activated protein kinase signaling cascade	22	2.14634	2.94914e-05	UNC5CL, IL1RN, NOD2, FZD10, TRAF1, TNF, SCIMP, RASGRP1, IL1A, TIAM1, CRACR2A, CD40LG, NAIP6, IL1B, F2RL1, CD27, TNFSF11, CCR7, MAP3K9, TLR6, TNIK, SLAMF1	838	184	20051	2.86086	0.176704	0.000631193	0.000576997
GOTERM_BP_FAT	GO:0070664~negative regulation of leukocyte proliferation	16	1.56098	3.00671e-05	BLK, RIPOR2, ARG2, CDKN2A, CD80, BTN1A1, PDCD1LG2, FOXP3, TSPAN32, ZC3H12D, GREM1, TARM1, BTLA, CTLA4, HAVCR2, IDO1	838	105	20051	3.64605	0.179823	0.000641432	0.000586358
GOTERM_BP_FAT	GO:0001934~positive regulation of protein phosphorylation	74	7.21951	3.08335e-05	CD40, IL1RN, FLT3, CD80, PTPN22, FZD10, CD3E, TNF, TNFSF11, IL12A, CCR7, MAP3K9, HAVCR2, UNC5CL, BORA, FGG, TRAF1, PROX1, ADRA2A, GREM1, IL1A, TIAM1, CLDN3, NAIP6, LCK, BANK1, IL1B, CHIL1, BIRC5, ADAM8, TLR6, TNIK, CX3CR1, RAMP3, TGFA, CDCA8, LPAR2, NOD2, PRKCZ, LRP8, RASGRP1, AURKB, CCNB1, CRACR2A, ERBB3, STAP1, CLSPN, ECT2, FGF23, CCL17, SLAMF1, PROM2, TBX1, NTRK1, GM10591, STIL, CCL22, LRRN3, …	838	1078	20051	1.6425	0.183957	0.000655659	0.000599363
GOTERM_BP_FAT	GO:0002718~regulation of cytokine production involved in immune response	18	1.7561	3.25602e-05	CD96, CD160, NOD2, GATA3, EPX, TNF, PRKCZ, SCIMP, FOXP3, PANX1, CENPF, NR4A3, TBX21, IL1B, F2RL1, CD226, IL18R1, SLAMF1	838	131	20051	3.28771	0.193195	0.00069015	0.000630893
GOTERM_BP_FAT	GO:0042130~negative regulation of T cell proliferation	14	1.36585	3.30203e-05	RIPOR2, ARG2, CDKN2A, CD80, BTN1A1, PDCD1LG2, FOXP3, TSPAN32, ZC3H12D, TARM1, BTLA, CTLA4, HAVCR2, IDO1	838	82	20051	4.08513	0.195639	0.000697661	0.000637758
GOTERM_BP_FAT	GO:0002293~alpha-beta T cell differentiation involved in immune response	13	1.26829	3.4271e-05	EOMES, LEF1, GATA3, PRKCZ, FOXP3, BATF, CRACR2A, TBX21, MYB, CCR7, SLAMF6, NFKBID, IL18R1	838	71	20051	4.38104	0.202244	0.000721772	0.0006598
GOTERM_BP_FAT	GO:0051303~establishment of chromosome localization	14	1.36585	3.76778e-05	CDCA5, CDCA8, KIF22, AURKB, NDC80, CENPE, CENPF, CCNB1, KIFC1, NUF2, BIRC5, KIF2C, SPDL1, CENPQ	838	83	20051	4.03591	0.219964	0.000788956	0.000721215
GOTERM_BP_FAT	GO:0032465~regulation of cytokinesis	16	1.56098	3.77004e-05	PLK1, MRGPRB1, CXCR5, CDCA8, KIF23, CDC6, AURKB, CDC14A, RACGAP1, PRC1, BIRC5, KIF20A, KIF20B, ECT2, RAB11FIP4, E2F8	838	107	20051	3.5779	0.22008	0.000788956	0.000721215
GOTERM_BP_FAT	GO:0002287~alpha-beta T cell activation involved in immune response	13	1.26829	3.95834e-05	EOMES, LEF1, GATA3, PRKCZ, FOXP3, BATF, CRACR2A, TBX21, MYB, CCR7, SLAMF6, NFKBID, IL18R1	838	72	20051	4.32019	0.229702	0.000825739	0.00075484
GOTERM_BP_FAT	GO:0042325~regulation of phosphorylation	105	10.2439	4.04225e-05	IL1RN, CD80, CCNF, FZD10, TNF, GRAP2, TBC1D10C, ENPP1, TNFSF11, IL12A, MAP3K9, TNFRSF4, UNC5CL, BORA, LAX1, TIAM1, CLDN3, CCNE2, NAIP6, CHIL1, ADAM8, TNIK, BLM, TGFA, CDCA8, LPAR2, PRDM11, PRKCZ, SAMSN1, RASGRP1, CCNB2, CRACR2A, CCNB1, CD19, SLAMF8, STAP1, CLSPN, ECT2, FGF23, SLAMF1, PROM2, GM10591, BARD1, STIL, LRRN3, PLK1, CDC6, L1CAM, MARCO, PKIB, TPX2, ITGB2L, CDK1, CD27, LAT, CD40, FLT3, PTP…	838	1693	20051	1.48397	0.233952	0.000840584	0.00076841
GOTERM_BP_FAT	GO:1901976~regulation of cell cycle checkpoint	11	1.07317	4.1047e-05	BARD1, RNASEH2B, CCNB1, RAD51, PBK, CDCA8, BIRC5, PROX1, BRCA1, AURKB, NDC80	838	51	20051	5.16077	0.2371	0.00084699	0.000774266
GOTERM_BP_FAT	GO:0042088~T-helper 1 type immune response	11	1.07317	4.1047e-05	CRACR2A, IL18RAP, IL1B, TBX21, LEF1, CCR7, IL12A, IL12RB1, IL18R1, SLAMF1, HAVCR2	838	51	20051	5.16077	0.2371	0.00084699	0.000774266
GOTERM_BP_FAT	GO:0050777~negative regulation of immune response	24	2.34146	4.1116e-05	CD96, CR2, ARG2, IFI206, PGLYRP2, CD160, NLRC3, NOD2, OAS1C, EPX, TNF, FOXP3, SAMSN1, OAS3, TBX21, SLAMF8, CTLA4, KLRD1, KLRC1, PDCD1, IL13RA2, IL7R, SLAMF1, HAVCR2	838	217	20051	2.64633	0.237447	0.00084699	0.000774266
GOTERM_BP_FAT	GO:0035744~T-helper 1 cell cytokine production	6	0.585366	4.6894e-05	IL18RAP, IL1B, TBX21, IL12A, IL18R1, SLAMF1	838	11	20051	13.0512	0.265951	0.000963008	0.000880322
GOTERM_BP_FAT	GO:0050000~chromosome localization	14	1.36585	4.87365e-05	CDCA5, CDCA8, KIF22, AURKB, NDC80, CENPE, CENPF, CCNB1, KIFC1, NUF2, BIRC5, KIF2C, SPDL1, CENPQ	838	85	20051	3.94095	0.274814	0.000996907	0.000911311
GOTERM_BP_FAT	GO:0050858~negative regulation of antigen receptor-mediated signaling pathway	9	0.878049	4.88472e-05	FCRL5, PVRIG, CD160, SH2D1A, PTPN22, UBASH3A, BTNL2, SLA2, CD22	838	33	20051	6.5256	0.275344	0.000996907	0.000911311
GOTERM_BP_FAT	GO:0040011~locomotion	123	12	5.22311e-05	RIPOR2, LY6K, IL1RN, ITGA2B, EPX, CELSR1, TNF, CXCL15, CDH1, ENPP1, TNFSF11, IL12A, PLXNC1, NANOS1, EOMES, RFX3, RUNX3, KNSTRN, TIAM1, CH25H, ARC, CLDN4, DEPDC1B, CLDN3, JAML, CLDN7, PADI2, ADAM8, LMX1B, KIF20B, RTN4R, TACSTD2, FPR1, GATA3, CACNA1E, PRKCZ, FUT4, TRPM2, CACNA1I, FUT7, SLAMF8, STAP1, FGF23, SLAMF1, WNT4, GM10591, CARMIL1, EGR2, CARMIL2, ST14, XCR1, GPR15, EGR3, BCL11B, TNFSF14, ARH…	838	2071	20051	1.42108	0.291332	0.00106268	0.000971434
GOTERM_BP_FAT	GO:0032615~interleukin-12 production	12	1.17073	5.30176e-05	CD40, CD40LG, FLT3, CCR7, NLRC3, NOD2, TLR6, MEFV, TIGIT, SCIMP, SLAMF1, IDO1	838	63	20051	4.55756	0.294998	0.00107536	0.000983028
GOTERM_MF_FAT	GO:0050135~NAD(P)+ nucleosidase activity	7	0.682927	5.44134e-05	IL18RAP, TLR12, TLR11, IL1RAP, TLR6, IL18R1, TLR13	738	18	18102	9.53884	0.0596877	0.00365859	0.00356154
GOTERM_MF_FAT	GO:0061809~NAD+ nucleotidase, cyclic ADP-ribose generating	7	0.682927	5.44134e-05	IL18RAP, TLR12, TLR11, IL1RAP, TLR6, IL18R1, TLR13	738	18	18102	9.53884	0.0596877	0.00365859	0.00356154
GOTERM_BP_FAT	GO:0050672~negative regulation of lymphocyte proliferation	15	1.46341	5.49215e-05	BLK, RIPOR2, ARG2, CDKN2A, CD80, BTN1A1, PDCD1LG2, FOXP3, TSPAN32, ZC3H12D, TARM1, BTLA, CTLA4, HAVCR2, IDO1	838	98	20051	3.66233	0.303792	0.00111056	0.00101521
GOTERM_MF_FAT	GO:0042802~identical protein binding	137	13.3659	5.4992e-05	RIPOR2, FAAH, IFI213, ITGA2B, RASEF, IFI214, PRF1, AQP5, AQP3, TNF, IKZF3, GIMAP7, TGM1, KLRB1C, CDH1, ENPP1, TNFSF11, SKP2, MIGA1, KCTD1, BHLHA15, FOXP3, KNSTRN, RUNX1, CLDN4, CLDN3, JAML, CD8A, CLDN8, CLDN7, PADI2, KIF20B, ABCG3, BLM, H2-M2, ILDR1, GATA3, MEFV, RASAL3, RASGRP1, KLRK1, SLAMF8, SLAMF7, ECT2, CD300LF, RAB11FIP4, SLAMF1, PACSIN1, BARD1, NFE2, TFAP2B, STIL, TNFSF14, BCL11A, PLK1, PY…	738	2431	18102	1.38231	0.0603029	0.00365859	0.00356154
GOTERM_BP_FAT	GO:0042327~positive regulation of phosphorylation	77	7.5122	5.57431e-05	CD40, IL1RN, FLT3, CD80, PTPN22, FZD10, CD3E, TNF, TNFSF11, IL12A, CCR7, MAP3K9, HAVCR2, UNC5CL, BORA, FGG, TRAF1, PROX1, ADRA2A, GREM1, FGR, IL1A, TIAM1, CLDN3, NAIP6, LCK, BANK1, IL1B, CHIL1, BIRC5, ADAM8, TLR6, TNIK, CX3CR1, RAMP3, TGFA, CDCA8, LPAR2, NOD2, PRKCZ, LRP8, RASGRP1, AURKB, CCNB1, CRACR2A, ERBB3, CD19, STAP1, CLSPN, ECT2, FGF23, CCL17, SLAMF1, PROM2, TBX1, NTRK1, GM10591, STIL, CCL…	838	1155	20051	1.59515	0.307554	0.00112373	0.00102724
GOTERM_BP_FAT	GO:0032945~negative regulation of mononuclear cell proliferation	15	1.46341	6.15504e-05	BLK, RIPOR2, ARG2, CDKN2A, CD80, BTN1A1, PDCD1LG2, FOXP3, TSPAN32, ZC3H12D, TARM1, BTLA, CTLA4, HAVCR2, IDO1	838	99	20051	3.62533	0.333566	0.00123498	0.00112894
GOTERM_BP_FAT	GO:0032655~regulation of interleukin-12 production	12	1.17073	6.16364e-05	CD40, CD40LG, FLT3, CCR7, NLRC3, NOD2, TLR6, MEFV, TIGIT, SCIMP, SLAMF1, IDO1	838	64	20051	4.48635	0.333944	0.00123498	0.00112894
GOTERM_BP_FAT	GO:0002260~lymphocyte homeostasis	14	1.36585	6.25165e-05	TNFRSF13C, FOXP3, GPR174, CCNB2, SIT1, ENPP1, TNFRSF17, PMAIP1, IL7R, BCL2A1A, TNFRSF4, LAT, GAPT, CHST3	838	87	20051	3.85036	0.337798	0.00124881	0.00114159
KEGG_PATHWAY	mmu05320:Autoimmune thyroid disease	13	1.26829	6.715e-05	H2-EB2, CD40, CD80, H2-M2, PRF1, GZMB, H2-Q2, H2-T-PS, CD40LG, CD28, H2-OB, CTLA4, H2-OA	363	79	8998	4.07902	0.0181656	0.00122661	0.00111021
GOTERM_BP_FAT	GO:0045061~thymic T cell selection	8	0.780488	7.06038e-05	ZAP70, CD28, CD3G, CCR7, GATA3, CD3E, CD3D, CARD11	838	26	20051	7.36222	0.372183	0.00140187	0.0012815
GOTERM_BP_FAT	GO:0035743~CD4-positive, alpha-beta T cell cytokine production	8	0.780488	7.06038e-05	IL18RAP, IL1B, TBX21, IL12A, GATA3, PRKCZ, IL18R1, SLAMF1	838	26	20051	7.36222	0.372183	0.00140187	0.0012815
GOTERM_CC_FAT	GO:0042101~T cell receptor complex	9	0.878049	7.50917e-05	ZAP70, TRGV1, TRBV19, CD6, TRAT1, CD3G, CD3E, CD3D, SKAP1	743	33	16713	6.13471	0.0500678	0.00244584	0.00231712
GOTERM_BP_FAT	GO:0035025~positive regulation of Rho protein signal transduction	9	0.878049	7.68975e-05	RTN4R, GPR174, P2RY10, GPR35, GPR55, LPAR2, F2RL1, P2RY10B, GPR18	838	35	20051	6.15271	0.397703	0.00152225	0.00139154
GOTERM_BP_FAT	GO:0002221~pattern recognition receptor signaling pathway	21	2.04878	7.74369e-05	TASL, CD40, PTPN22, NOD2, OAS1C, MEFV, TNF, SCIMP, FCNB, TREML4, OAS3, TLR12, TLR11, F2RL1, TLR6, SLC15A3, CLEC4E, CD300LF, OASL1, TLR13, HAVCR2	838	182	20051	2.76083	0.399841	0.00152834	0.00139711
GOTERM_BP_FAT	GO:0033079~immature T cell proliferation	7	0.682927	8.83486e-05	IL1A, BLM, CDKN2A, IL1B, TNFRSF9, FOXP3, WNT4	838	19	20051	8.81529	0.441504	0.00173849	0.00158922
GOTERM_BP_FAT	GO:0043410~positive regulation of MAPK cascade	44	4.29268	9.08734e-05	CD40, IL1RN, RAMP3, LPAR2, TGFA, PTPN22, FZD10, NOD2, PRKCZ, RASGRP1, TNF, CRACR2A, TNFSF11, CCR7, MAP3K9, CCL17, FGF23, SLAMF1, HAVCR2, TBX1, GM10591, NTRK1, UNC5CL, CCL22, FGG, GPR55, OSM, TRAF1, SCIMP, ADRA2A, MARCO, TIAM1, IL1A, CD4, CD40LG, BANK1, NAIP6, IL1B, CHIL1, F2RL1, CD27, ADAM8, TLR6, TNIK	838	559	20051	1.88336	0.450725	0.00178285	0.00162977
GOTERM_BP_FAT	GO:0046328~regulation of JNK cascade	22	2.14634	9.31928e-05	UNC5CL, IL1RN, PTPN22, NOD2, FZD10, TRAF1, TNF, RASGRP1, IL1A, TIAM1, CRACR2A, CD40LG, NAIP6, IL1B, F2RL1, CD27, TNFSF11, CCR7, MAP3K9, TLR6, TNIK, SLAMF1	838	199	20051	2.64522	0.459061	0.00182293	0.00166641
GOTERM_BP_FAT	GO:0002709~regulation of T cell mediated immunity	16	1.56098	9.71958e-05	H2-M2, H2-Q2, NOD2, GATA3, PRKCZ, FOXP3, CENPF, FUT7, TBX21, IL1B, KLRD1, IL12A, KLRC1, IL7R, IL18R1, SLAMF1	838	116	20051	3.3003	0.473152	0.00189561	0.00173285
GOTERM_BP_FAT	GO:0035556~intracellular signal transduction	151	14.7317	9.93016e-05	RIPOR2, IL1RN, FZD10, CELSR1, SLA2, TNF, GPR174, GRAP2, TBC1D10C, TNFSF11, IL12A, MAP3K9, STK32C, UNC5CL, CISH, BHLHA15, HASPIN, LAX1, TIAM1, DEPDC1B, DEPDC1A, MELK, NAIP6, RRAGB, CD8A, CHIL1, ADAM8, TNIK, RAB39, CARD11, RTN4R, TGFA, LPAR2, RASAL1, GATA3, P2RY10B, PRDM11, RASAL3, PRKCZ, RASGRP1, TRPM2, CRACR2A, NUAK2, RACGAP1, FIGNL1, PMAIP1, ECT2, SLC15A3, FGF23, SLAMF1, GM10591, XCR1, TNFSF14, …	838	2689	20051	1.34363	0.480417	0.00193096	0.00176517
GOTERM_BP_FAT	GO:0051276~chromosome organization	83	8.09756	0.000104216	FOXA1, TOP2A, ZWILCH, GFI1, BRCA1, KIF11, PRDM1, MKI67, CDC20, MTBP, CHAF1B, CHAF1A, NUF2, MYB, NUSAP1, NEK2, KNTC1, SPDL1, DLGAP5, EOMES, WDHD1, HELLS, RMI2, DDX11, MST1, KIF23, PAX5, KIF22, HASPIN, FOXP3, KNSTRN, KIF4, CCNA2, ESPL1, CCNE2, KIFC1, BIRC5, PADI2, KIF2C, DNA2, TOX, PIF1, BLM, UHRF1, CDCA5, LEF1, CDCA8, NCAPG, FTX, GATA3, CENPA, NSL1, AURKB, CCNB1, DSN1, RACGAP1, BUB1, BARD1, STIL, …	838	1296	20051	1.53238	0.496982	0.00202056	0.00184707
GOTERM_BP_FAT	GO:0071345~cellular response to cytokine stimulus	71	6.92683	0.000106354	RIPOR2, CD40, IL1RN, FLT3, IFI213, GFI1, IFI214, IL5RA, BRCA1, IL1RAP, TNFRSF13C, TNF, TRBV13-2, CXCL15, RAB43, IL18RAP, MYB, TNFSF11, MYBL2, CCR7, IL13RA2, NEFH, OASL1, 9930111J21RIK1, HELLS, GBP8, PIRA13, GPR35, IL1R2, PIRA12, FGG, TRAF1, IFIT1BL1, IL1A, NAIP6, IL1B, OAS3, CHIL1, PADI2, IL9R, LILRA6, CX3CR1, TXK, LEF1, ILDR1, DTX1, OAS1C, GATA3, CXCR2, SPP1, IL21R, STAT4, TNFRSF17, STAP1, IL12R…	838	1063	20051	1.59815	0.504024	0.00205597	0.00187944
GOTERM_BP_FAT	GO:1902749~regulation of cell cycle G2/M phase transition	16	1.56098	0.000107267	BARD1, MBD4, RNASEH2B, BLM, ATAD5, CDKN2A, PLK1, CDC7, CDC6, BRCA1, AURKB, CENPF, CCNB1, CDK1, RBBP8, CLSPN	838	117	20051	3.2721	0.507001	0.00206755	0.00189003
GOTERM_BP_FAT	GO:0045859~regulation of protein kinase activity	51	4.97561	0.000107688	CD40, IL1RN, CCNF, PTPN22, FZD10, TNF, TNFSF11, CCR7, MAP3K9, TNFRSF4, DUSP2, BORA, MST1, PROX1, LAX1, ADRA2A, CCNA2, GREM1, FGR, TIAM1, CCNE2, IL1B, CHIL1, ADAM8, TLR6, TNIK, BLM, RGS14, TGFA, NOD2, PRKCZ, LRP8, RASGRP1, CCNB2, CCNB1, ERBB3, STAP1, CLSPN, ECT2, STIL, CDKN2A, PLK1, CDC6, TPX2, PKIB, CENPE, CD4, CD40LG, ABI3, LAT, CDK5R1	838	689	20051	1.7711	0.508369	0.00206962	0.00189192
GOTERM_BP_FAT	GO:0065009~regulation of molecular function	153	14.9268	0.000110122	FOXA1, RIPOR2, FCMR, IL1RN, GFI1, CCNF, IL1RAP, FZD10, TNF, CDC20, IL18RAP, CDH1, RGS1, TBC1D30, TBC1D10C, ENPP1, TNFRSF8, TNFSF11, NEK2, PLXNC1, MAP3K9, TNFRSF4, EOMES, BORA, DDX11, LAX1, FOXP3, TIAM1, ARC, CLDN4, CLDN3, CCNE2, SPINT1, NAIP6, CHIL1, ADAM8, TNIK, CSTDC4, CARD11, RTN4R, BLK, PIF1, BLM, CDCA5, TXK, TGFA, RASAL1, GATA3, ARHGAP15, MEFV, RASAL3, PRKCZ, RASGRP1, STFA2L1, ARHGAP22, CCNB…	838	2737	20051	1.33755	0.516197	0.00211025	0.00192906
GOTERM_BP_FAT	GO:0032467~positive regulation of cytokinesis	11	1.07317	0.000110644	RACGAP1, CXCR5, MRGPRB1, CDCA8, BIRC5, KIF23, CDC6, KIF20B, ECT2, CDC14A, AURKB	838	57	20051	4.61753	0.517859	0.00211411	0.00193259
GOTERM_BP_FAT	GO:0051315~attachment of mitotic spindle microtubules to kinetochore	7	0.682927	0.000121772	CENPE, NUF2, CDCA8, BIRC5, KIF2C, AURKB, NDC80	838	20	20051	8.37452	0.551967	0.00232	0.0021208
GOTERM_BP_FAT	GO:0042093~T-helper cell differentiation	12	1.17073	0.000125062	CRACR2A, TBX21, MYB, LEF1, CCR7, SLAMF6, GATA3, FOXP3, NFKBID, PRKCZ, IL18R1, BATF	838	69	20051	4.16125	0.561583	0.00237582	0.00217183
GOTERM_BP_FAT	GO:0051785~positive regulation of nuclear division	14	1.36585	0.000126003	UBE2C, CDCA5, TGFA, CDCA8, TNF, AURKB, RAD51AP1, IL1A, CENPE, IL1B, CD28, NUSAP1, BIRC5, WNT4	838	93	20051	3.60195	0.564295	0.00237997	0.00217563
GOTERM_BP_FAT	GO:0050766~positive regulation of phagocytosis	14	1.36585	0.000126003	GM5150, SIRPB1B, SIRPB1A, ITGA2, NOD2, TNF, IL1B, F2RL1, STAP1, CCR7, PTX3, GM9733, CD300LF, SIRPB1C	838	93	20051	3.60195	0.564295	0.00237997	0.00217563
GOTERM_BP_FAT	GO:0010389~regulation of G2/M transition of mitotic cell cycle	15	1.46341	0.000130789	BARD1, MBD4, RNASEH2B, BLM, CDKN2A, PLK1, CDC7, CDC6, BRCA1, AURKB, CENPF, CCNB1, CDK1, RBBP8, CLSPN	838	106	20051	3.38593	0.577831	0.00246332	0.00225181
GOTERM_BP_FAT	GO:0032768~regulation of monooxygenase activity	10	0.97561	0.000142821	DHFR, IL1A, ARG2, GCH1, CNR2, VDR, IL1B, GFI1, FCER2A, TNF	838	48	20051	4.98483	0.610029	0.00267069	0.00244138
GOTERM_BP_FAT	GO:0002294~CD4-positive, alpha-beta T cell differentiation involved in immune response	12	1.17073	0.000142862	CRACR2A, TBX21, MYB, LEF1, CCR7, SLAMF6, GATA3, FOXP3, NFKBID, PRKCZ, IL18R1, BATF	838	70	20051	4.10181	0.610136	0.00267069	0.00244138
GOTERM_BP_FAT	GO:0050869~negative regulation of B cell activation	9	0.878049	0.000143015	BLK, CDKN2A, BANK1, FLT3, TBC1D10C, BTLA, CTLA4, FOXP3, SAMSN1	838	38	20051	5.66697	0.610528	0.00267069	0.00244138
GOTERM_BP_FAT	GO:0031401~positive regulation of protein modification process	86	8.39024	0.000143616	CD40, IL1RN, FLT3, CD80, PTPN22, BRCA1, FZD10, CD3E, TNF, CDC20, MYB, TNFSF11, IL12A, CCR7, MAP3K9, SKP2, HAVCR2, UNC5CL, BORA, CEP295, FGG, TRAF1, PROX1, FOXP3, ADRA2A, GREM1, IL1A, TIAM1, CLDN3, NAIP6, LCK, BANK1, IL1B, CHIL1, BIRC5, ADAM8, TLR6, TNIK, CX3CR1, RAMP3, CDCA2, TGFA, CDCA8, LPAR2, NOD2, GATA3, PRKCZ, LRP8, RASGRP1, AURKB, CCNB1, CRACR2A, ERBB3, STAP1, CLSPN, ECT2, FGF23, CCL17, SLA…	838	1368	20051	1.5042	0.61207	0.00267435	0.00244472
GOTERM_MF_FAT	GO:0030246~carbohydrate binding	28	2.73171	0.000143728	LY75, SIGLECG, SIGLECF, ENDOU, FCNB, KLRB1C, KLRK1, KLRB1F, CLEC5A, ENPP1, KLRI1, GALNT6, H2-EB2, CD72, KLRA7, GALNT3, KLRA17, KLRA2, KLRA3, PRG3, SELL, KLRD1, PTX3, CLEC2I, FCER2A, CD69, CLEC4E, CD22	738	306	18102	2.24443	0.150041	0.00903089	0.00879134
GOTERM_BP_FAT	GO:0006259~DNA metabolic process	71	6.92683	0.000144207	TOP2A, CD40, TONSL, CGAS, MCM10, BRCA1, FOXM1, TNF, CHAF1B, CHAF1A, PCLAF, NEK2, CCR6, TK1, POLE, EOMES, WDHD1, HELLS, RMI2, DDX11, DNTT, KIF22, FOXP3, ADRA2A, CCNA2, GREM1, MMS22L, NEIL3, DBF4, CCNE2, DNA2, TOX, DNASE1L3, PIF1, RNASEH2B, BLM, UHRF1, PRIM1, CDCA5, LEF1, FTX, GATA3, NUGGC, AURKB, UNG, RAD51AP1, TBX21, FIGNL1, RBBP8, CLSPN, E2F8, BARD1, MBD4, RRM2, ATAD5, BCL11B, CDKN2A, GINS3, FAN…	838	1073	20051	1.58325	0.613577	0.00267777	0.00244786
GOTERM_BP_FAT	GO:0002831~regulation of response to biotic stimulus	21	2.04878	0.000150804	ARG2, CD160, CGAS, IFNLR1, PTPN22, NOD2, IFIT1BL1, SCIMP, FOXP3, TSPAN32, CD40LG, KLRK1, TREML4, IL1B, F2RL1, CD226, IL12A, IL12RB1, ULBP1, OASL1, HAVCR2	838	191	20051	2.63074	0.630028	0.00278827	0.00254887
GOTERM_BP_FAT	GO:0051094~positive regulation of developmental process	104	10.1463	0.000151003	FOXA1, RIPOR2, GPR68, GFI1, IL1RAP, NCMAP, TNF, CDC20, MYB, XLR4B, TNFSF11, IL12A, PLXNC1, RFX3, RUNX3, FOXP3, UNC13D, RUNX2, RUNX1, TIAM1, SPINT1, CHIL1, ADAM8, TNIK, KIF20B, TOX, CD101, IDO1, BLM, SHOX2, TACSTD2, RASAL1, GATA3, PRKCZ, RASGRP1, CCNB1, TESPA1, EVI2, ECT2, WNT4, PACSIN1, CARMIL1, EGR2, CARMIL2, EGR3, LRRN3, TNFSF14, VDR, BCL11A, L1CAM, ITGB2L, CD28, CDK1, CD27, SERPINI1, IL7R, HAM…	838	1732	20051	1.43674	0.630513	0.00278827	0.00254887
GOTERM_BP_FAT	GO:0032872~regulation of stress-activated MAPK cascade	25	2.43902	0.000153701	IL1RN, PTPN22, FZD10, NOD2, FOXM1, RASGRP1, TNF, CRACR2A, PBK, TNFSF11, CCR7, MAP3K9, SLAMF1, UNC5CL, TRAF1, SCIMP, TIAM1, IL1A, CD40LG, NAIP6, IL1B, F2RL1, CD27, TLR6, TNIK	838	252	20051	2.37373	0.637029	0.00283017	0.00258716
GOTERM_CC_FAT	GO:0005813~centrosome	53	5.17073	0.000162266	TOP2A, PATJ, CCNF, BRCA1, CDC14A, GPR174, CDC20, PCLAF, RTTN, NEK2, DLGAP5, CEP55, CKAP2L, CEP295, DDX11, CKAP2, KCTD1, KIF23, IFT80, HASPIN, CCSAP, KNSTRN, IL17RB, ASPM, TIAM1, ESPL1, CCNE2, KIFC1, LCK, BIRC5, KIF2C, HAP1, KIF20B, TEDC1, RGS14, NLRC3, HMMR, AURKB, CCNB2, CCNB1, HAUS8, STIL, SPAG5, TRAT1, PLK1, TTC39A, NDC80, CENPF, HOOK1, SASS6, TACC3, CDK1, HYLS1	743	695	16713	1.71537	0.10506	0.005045	0.00477947
GOTERM_BP_FAT	GO:0002200~somatic diversification of immune receptors	13	1.26829	0.00016402	CD40, BCL11B, ATAD5, LEF1, FOXP3, NUGGC, AICDA, BATF, UNG, CD40LG, TBX21, CD28, CCR6	838	83	20051	3.74763	0.660905	0.00301176	0.00275317
GOTERM_BP_FAT	GO:0032634~interleukin-5 production	7	0.682927	0.000164487	LEF1, IL1RAP, GATA3, EPX, FOXP3, PRKCZ, IL17RB	838	21	20051	7.97574	0.661946	0.00301194	0.00275333
GOTERM_BP_FAT	GO:0070232~regulation of T cell apoptotic process	10	0.97561	0.00016855	BLM, ARG2, BCL11B, CD27, ADAM8, PDCD1, IL7R, TNFRSF4, NFKBID, IDO1	838	49	20051	4.8831	0.670883	0.00307778	0.00281352
GOTERM_BP_FAT	GO:0010562~positive regulation of phosphorus metabolic process	80	7.80488	0.00016991	CD40, IL1RN, FLT3, CD80, PTPN22, FZD10, CD3E, TNF, TNFSF11, IL12A, CD244A, CCR7, MAP3K9, HAVCR2, UNC5CL, BORA, ITGA2, FGG, TRAF1, PROX1, ADRA2A, GREM1, FGR, IL1A, TIAM1, CLDN3, NAIP6, LCK, BANK1, IL1B, CHIL1, BIRC5, ADAM8, TLR6, TNIK, CX3CR1, RAMP3, CDCA2, TGFA, CDCA8, LPAR2, NOD2, PRKCZ, LRP8, RASGRP1, AURKB, CCNB1, CRACR2A, ERBB3, CD19, STAP1, CLSPN, ECT2, FGF23, CCL17, SLAMF1, PROM2, TBX1, NTR…	838	1256	20051	1.52403	0.673821	0.00308552	0.00282059
GOTERM_BP_FAT	GO:0045937~positive regulation of phosphate metabolic process	80	7.80488	0.00016991	CD40, IL1RN, FLT3, CD80, PTPN22, FZD10, CD3E, TNF, TNFSF11, IL12A, CD244A, CCR7, MAP3K9, HAVCR2, UNC5CL, BORA, ITGA2, FGG, TRAF1, PROX1, ADRA2A, GREM1, FGR, IL1A, TIAM1, CLDN3, NAIP6, LCK, BANK1, IL1B, CHIL1, BIRC5, ADAM8, TLR6, TNIK, CX3CR1, RAMP3, CDCA2, TGFA, CDCA8, LPAR2, NOD2, PRKCZ, LRP8, RASGRP1, AURKB, CCNB1, CRACR2A, ERBB3, CD19, STAP1, CLSPN, ECT2, FGF23, CCL17, SLAMF1, PROM2, TBX1, NTR…	838	1256	20051	1.52403	0.673821	0.00308552	0.00282059
KEGG_PATHWAY	mmu05166:Human T-cell leukemia virus 1 infection	24	2.34146	0.000177281	H2-EB2, CD40, EGR2, CDKN2A, H2-M2, IL1R2, H2-Q2, CD3G, TNFRSF13C, H2-T-PS, CD3E, TNF, CD3D, CCNA2, CDC20, CCNB2, CD4, ITGB2L, CCNE2, ESPL1, LCK, LTA, H2-OB, H2-OA	363	250	8998	2.37964	0.0472492	0.00303593	0.00274785
GOTERM_BP_FAT	GO:0070302~regulation of stress-activated protein kinase signaling cascade	25	2.43902	0.000183397	IL1RN, PTPN22, FZD10, NOD2, FOXM1, RASGRP1, TNF, CRACR2A, PBK, TNFSF11, CCR7, MAP3K9, SLAMF1, UNC5CL, TRAF1, SCIMP, TIAM1, IL1A, CD40LG, NAIP6, IL1B, F2RL1, CD27, TLR6, TNIK	838	255	20051	2.3458	0.701578	0.0033213	0.00303613
GOTERM_BP_FAT	GO:0045840~positive regulation of mitotic nuclear division	12	1.17073	0.000184985	CENPE, IL1A, UBE2C, IL1B, CDCA5, CD28, NUSAP1, CDCA8, BIRC5, TGFA, TNF, AURKB	838	72	20051	3.98787	0.704686	0.00334087	0.00305402
GOTERM_BP_FAT	GO:0007254~JNK cascade	22	2.14634	0.00018625	UNC5CL, IL1RN, PTPN22, NOD2, FZD10, TRAF1, TNF, RASGRP1, IL1A, TIAM1, CRACR2A, CD40LG, NAIP6, IL1B, F2RL1, CD27, TNFSF11, CCR7, MAP3K9, TLR6, TNIK, SLAMF1	838	209	20051	2.51865	0.707141	0.00335454	0.00306652
GOTERM_BP_FAT	GO:0034508~centromere complex assembly	8	0.780488	0.000188865	HELLS, CENPE, CENPH, KNTC1, CENPN, CENPA, DLGAP5, CENPS	838	30	20051	6.38059	0.712147	0.00339237	0.00310109
GOTERM_BP_FAT	GO:0051090~regulation of sequence-specific DNA binding transcription factor activity	36	3.5122	0.00019085	FOXA1, CX3CR1, TRIM30B, CD40, TRIM30C, GFI1, NLRC3, NOD2, NLRC4, IL1RAP, PRKCZ, LRP8, TNF, IL18RAP, ENPP1, TNFRSF8, TNFSF11, TNFRSF4, HAVCR2, NTRK1, EOMES, CDKN2A, RIPK4, FANCA, TRAF1, PROX1, FOXP3, GREM1, ITGB2L, CD40LG, IL1B, ADAM8, TLR6, NFKBID, CARD11, IL18R1	838	438	20051	1.96662	0.715891	0.00341871	0.00312518
GOTERM_BP_FAT	GO:0070227~lymphocyte apoptotic process	15	1.46341	0.000194908	BLK, ARG2, FCMR, BLM, BCL11B, AURKB, HSH2D, CD27, ADAM8, PDCD1, IL7R, BCL2A1A, NFKBID, TNFRSF4, IDO1	838	110	20051	3.2628	0.723393	0.00348194	0.00318298
KEGG_PATHWAY	mmu04650:Natural killer cell mediated cytotoxicity	15	1.46341	0.000200239	KLRA7, SH2D1A, KLRA3, PRF1, GZMB, TNF, ZAP70, ITGB2L, KLRK1, LCK, KLRD1, CD244A, KLRC1, ULBP1, LAT	363	115	8998	3.2332	0.0532032	0.00322738	0.00292114
GOTERM_MF_FAT	GO:1990939~ATP-dependent microtubule motor activity	11	1.07317	0.000213094	CENPE, KIF18B, KIFC1, KIF23, KIF2C, KIF22, KIF20A, KIF11, KIF20B, KIF15, KIF4	738	63	18102	4.28275	0.214185	0.0126847	0.0123482
GOTERM_BP_FAT	GO:0045576~mast cell activation	14	1.36585	0.00021544	BLK, MRGPRB1, RHOH, RASGRP1, UNC13D, FGR, RAB44, NR4A3, CNR2, CD226, IL13RA2, HAVCR1, CD300LF, LAT	838	98	20051	3.41817	0.758419	0.00383833	0.00350876
GOTERM_CC_FAT	GO:0051233~spindle midzone	9	0.878049	0.000217318	CENPE, KIF18B, RACGAP1, PRC1, PLK1, CDCA8, CDC6, KIF20B, AURKB	743	38	16713	5.32751	0.13814	0.00646286	0.00612271
GOTERM_BP_FAT	GO:0002643~regulation of tolerance induction	7	0.682927	0.000218225	CCR7, PDCD1, CD3E, FOXP3, HAVCR2, RUNX1, IDO1	838	22	20051	7.6132	0.762814	0.00387746	0.00354453
GOTERM_BP_FAT	GO:0002562~somatic diversification of immune receptors via germline recombination within a single locus	12	1.17073	0.000237186	CD40, CD40LG, BCL11B, ATAD5, TBX21, LEF1, CD28, CCR6, FOXP3, AICDA, UNG, BATF	838	74	20051	3.88009	0.790693	0.00419178	0.00383186
GOTERM_BP_FAT	GO:0016444~somatic cell DNA recombination	12	1.17073	0.000237186	CD40, CD40LG, BCL11B, ATAD5, TBX21, LEF1, CD28, CCR6, FOXP3, AICDA, UNG, BATF	838	74	20051	3.88009	0.790693	0.00419178	0.00383186
GOTERM_CC_FAT	GO:0000940~condensed chromosome outer kinetochore	6	0.585366	0.000243699	CENPE, CENPF, CCNB1, PLK1, SPDL1, NDC80	743	14	16713	9.64026	0.153555	0.00694542	0.00657988
GOTERM_BP_FAT	GO:0019932~second-messenger-mediated signaling	29	2.82927	0.000261899	CX3CR1, CXCR5, CGAS, CD3E, SLA2, TNF, SIGLECG, RNF157, TRPM2, ERBB3, CXCR2, TBC1D10C, CCR8, TNFSF11, CCR7, CCR6, CCR4, CCR3, XCR1, TRAT1, BHLHA15, L1CAM, ZAP70, CD4, CD8A, ACKR4, HAP1, CD22, LAT	838	326	20051	2.12849	0.82217	0.00460999	0.00421417
GOTERM_BP_FAT	GO:0043085~positive regulation of catalytic activity	77	7.5122	0.000262249	ARHGAP11A, ITK, CD40, IL1RN, FLT3, FZD10, TNF, CDC20, RASGEF1B, RGS1, TBC1D30, TBC1D10C, TNFSF11, NEK2, CCR7, MAP3K9, RALGPS2, BORA, ITGA2, DDX11, PROX1, ADRA2A, GREM1, FGR, TIAM1, CLDN4, CLDN3, LCK, IL1B, CHIL1, FCER2A, ADAM8, TLR6, TNIK, RTN4R, RGS14, TXK, TGFA, NLRC4, NOD2, MEFV, PRKCZ, LRP8, RASGRP1, AURKB, ARHGAP22, ERBB3, CD19, PMAIP1, STAP1, CLSPN, ECT2, FGF23, CCL17, WNT4, NTRK1, GM10591,…	838	1214	20051	1.51762	0.82258	0.00460999	0.00421417
GOTERM_BP_FAT	GO:0043549~regulation of kinase activity	55	5.36585	0.000263674	CD40, IL1RN, FLT3, CCNF, PTPN22, FZD10, TNF, TNFSF11, CCR7, MAP3K9, TNFRSF4, DUSP2, BORA, MST1, PROX1, LAX1, ADRA2A, CCNA2, GREM1, FGR, TIAM1, CCNE2, IL1B, CHIL1, ADAM8, TLR6, TNIK, BLM, RGS14, TGFA, NOD2, PRKCZ, LRP8, RASGRP1, CCNB2, CCNB1, ERBB3, CD19, SLAMF8, STAP1, CLSPN, ECT2, NTRK1, STIL, CDKN2A, PLK1, CDC6, TPX2, PKIB, CENPE, CD4, CD40LG, ABI3, LAT, CDK5R1	838	790	20051	1.66582	0.824239	0.00462271	0.00422579
GOTERM_BP_FAT	GO:0033080~immature T cell proliferation in thymus	6	0.585366	0.000265065	IL1A, BLM, CDKN2A, IL1B, FOXP3, WNT4	838	15	20051	9.57088	0.825845	0.00463478	0.00423683
GOTERM_BP_FAT	GO:0032612~interleukin-1 production	16	1.56098	0.00026954	CX3CR1, ARG2, IFI206, IL1R2, NLRC3, NOD2, NLRC4, MEFV, TNF, PANX1, IL1B, F2RL1, CCR7, TLR6, FFAR1, HAVCR2	838	127	20051	3.01445	0.830909	0.00470055	0.00429695
GOTERM_BP_FAT	GO:0033043~regulation of organelle organization	90	8.78049	0.000279766	TOP2A, RIPOR2, PATJ, ZWILCH, GFI1, CCNF, BRCA1, KIF11, FZD10, MKI67, CELSR1, TNF, CDC14A, CDC20, MTBP, NUF2, TBC1D30, MYB, NUSAP1, NEK2, KNTC1, SPDL1, WDHD1, RMI2, BORA, CEP295, DDX11, CKAP2, RHOH, PROX1, PAX5, FOXP3, CCSAP, FGR, IL1A, KIFC1, IL1B, BIRC5, PADI2, HAP1, MNS1, KIF20B, CDKL1, PIF1, CDCA2, CDCA5, TACSTD2, TGFA, CDCA8, NCAPG, SLAIN1, GATA3, AURKB, RAD51AP1, TRPM2, CCNB1, PMAIP1, STAP1,…	838	1478	20051	1.457	0.841936	0.00486602	0.00444821
GOTERM_BP_FAT	GO:0051347~positive regulation of transferase activity	45	4.39024	0.000283225	CD40, IL1RN, FLT3, TGFA, FZD10, NOD2, PRKCZ, LRP8, RASGRP1, TNF, AURKB, CDC20, ERBB3, CD19, STAP1, TNFSF11, NEK2, CCR7, MAP3K9, CLSPN, ECT2, NTRK1, STIL, BORA, GINS3, PLK1, CDC6, PROX1, ADRA2A, GREM1, FGR, PKIB, CENPE, TIAM1, TPX2, CD4, CD40LG, ABI3, IL1B, CHIL1, ADAM8, TLR6, TNIK, LAT, CDK5R1	838	607	20051	1.77385	0.845501	0.00491321	0.00449136
GOTERM_BP_FAT	GO:0002720~positive regulation of cytokine production involved in immune response	13	1.26829	0.00028754	CD160, NOD2, GATA3, PRKCZ, SCIMP, PANX1, NR4A3, TBX21, IL1B, F2RL1, CD226, IL18R1, SLAMF1	838	88	20051	3.5347	0.849836	0.00497497	0.00454781
GOTERM_BP_FAT	GO:0051091~positive regulation of sequence-specific DNA binding transcription factor activity	26	2.53659	0.000290328	FOXA1, CX3CR1, TRIM30B, CD40, TRIM30C, NOD2, NLRC4, IL1RAP, PRKCZ, LRP8, TNF, IL18RAP, TNFRSF8, TNFSF11, NTRK1, CDKN2A, RIPK4, TRAF1, GREM1, ITGB2L, CD40LG, IL1B, ADAM8, TLR6, CARD11, IL18R1	838	279	20051	2.22978	0.852572	0.00499729	0.00456822
GOTERM_BP_FAT	GO:0002418~immune response to tumor cell	8	0.780488	0.000290346	CD40LG, KLRK1, CD160, PRF1, CD226, IL12A, ULBP1, HAVCR2	838	32	20051	5.9818	0.852589	0.00499729	0.00456822
GOTERM_BP_FAT	GO:0044093~positive regulation of molecular function	97	9.46341	0.000296647	FOXA1, RIPOR2, IL1RN, IL1RAP, FZD10, TNF, CDC20, IL18RAP, RGS1, TBC1D30, TBC1D10C, TNFRSF8, TNFSF11, NEK2, MAP3K9, BORA, DDX11, TIAM1, ARC, CLDN4, CLDN3, CHIL1, ADAM8, TNIK, CARD11, RTN4R, BLK, TXK, TGFA, GATA3, MEFV, PRKCZ, RASGRP1, ARHGAP22, CRACR2A, CD19, PMAIP1, STAP1, CLSPN, ECT2, FGF23, WNT4, GM10591, STIL, VDR, PLK1, CDC6, DHFR, PKIB, TPX2, ITGB2L, LAT, ARHGAP11A, ITK, CD40, TRIM30B, TRIM3…	838	1620	20051	1.43268	0.858589	0.00507325	0.00463766
GOTERM_BP_FAT	GO:0032635~interleukin-6 production	19	1.85366	0.000297069	FLT3, IL36G, PTPN22, NLRC3, NOD2, IL1RAP, POU2F2, TNF, SCIMP, FOXP3, MAPK13, IL1A, IL18RAP, BANK1, IL1B, F2RL1, TLR6, SLAMF1, HAVCR2	838	171	20051	2.65858	0.858982	0.00507325	0.00463766
GOTERM_BP_FAT	GO:0002687~positive regulation of leukocyte migration	19	1.85366	0.000297069	CX3CR1, RIPOR2, TNFSF14, ITGA2, ITGA2B, FUT4, IL1A, FUT7, SELL, IL1B, CXCR2, F2RL1, MADCAM1, CCR7, ADAM8, IL12A, CCR6, CHST2, SLAMF1	838	171	20051	2.65858	0.858982	0.00507325	0.00463766
GOTERM_BP_FAT	GO:0002820~negative regulation of adaptive immune response	11	1.07317	0.000298306	CR2, CD160, TBX21, KLRD1, KLRC1, NOD2, IL7R, FOXP3, SAMSN1, SLAMF1, HAVCR2	838	64	20051	4.11249	0.860128	0.00508123	0.00464495
GOTERM_MF_FAT	GO:0015631~tubulin binding	32	3.12195	0.000299438	RGS14, KIF11, KIF15, RACGAP1, HAUS8, NUSAP1, GTSE1, DLGAP5, GAS2L3, SPAG5, CEP295, PLK1, DCLK2, KIF23, KIF22, CCSAP, KNSTRN, KIF4, CENPE, TIAM1, TPX2, CENPF, KIF18B, HOOK1, KIFC1, PRC1, TRIM36, BIRC5, KIF2C, KIF20A, KIF20B, SPC24	738	389	18102	2.01776	0.287314	0.0169332	0.016484
GOTERM_BP_FAT	GO:0051403~stress-activated MAPK cascade	26	2.53659	0.000306548	IL1RN, PTPN22, FZD10, NOD2, FOXM1, RASGRP1, TNF, CRACR2A, PBK, TNFSF11, CCR7, MAP3K9, SLAMF1, UNC5CL, TRAF1, SCIMP, MAPK13, TIAM1, IL1A, CD40LG, NAIP6, IL1B, F2RL1, CD27, TLR6, TNIK	838	280	20051	2.22181	0.867527	0.00520815	0.00476097
GOTERM_MF_FAT	GO:0003777~microtubule motor activity	11	1.07317	0.000315226	CENPE, KIF18B, KIFC1, KIF23, KIF2C, KIF22, KIF20A, KIF11, KIF20B, KIF15, KIF4	738	66	18102	4.08808	0.299932	0.0169772	0.0165269
GOTERM_BP_FAT	GO:0001776~leukocyte homeostasis	16	1.56098	0.000319881	FLT3, TNFRSF13C, FOXP3, GPR174, CCNB2, SIT1, CXCR2, ENPP1, TNFRSF17, PMAIP1, IL7R, BCL2A1A, TNFRSF4, LAT, GAPT, CHST3	838	129	20051	2.96772	0.878679	0.00542071	0.00495528
GOTERM_CC_FAT	GO:0031262~Ndc80 complex	4	0.390244	0.000337116	NUF2, SPC24, NDC80, SPC25	743	4	16713	22.4939	0.205964	0.00922349	0.00873804
GOTERM_BP_FAT	GO:1902624~positive regulation of neutrophil migration	9	0.878049	0.000352674	RIPOR2, IL1A, FUT7, SELL, IL1B, CXCR2, CCR7, ADAM8, FUT4	838	43	20051	5.00802	0.902274	0.0059611	0.00544927
GOTERM_BP_FAT	GO:0046629~gamma-delta T cell activation	7	0.682927	0.000366522	ITK, EGR3, JAML, LCK, LEF1, KLRC1, GPR18	838	24	20051	6.97877	0.910804	0.00617931	0.00564875
GOTERM_BP_FAT	GO:0033084~regulation of immature T cell proliferation in thymus	6	0.585366	0.00037235	IL1A, BLM, CDKN2A, IL1B, TNFRSF9, FOXP3	838	16	20051	8.9727	0.914168	0.00624563	0.00570937
GOTERM_BP_FAT	GO:1901978~positive regulation of cell cycle checkpoint	6	0.585366	0.00037235	PBK, CDCA8, BIRC5, PROX1, AURKB, NDC80	838	16	20051	8.9727	0.914168	0.00624563	0.00570937
GOTERM_BP_FAT	GO:0043408~regulation of MAPK cascade	54	5.26829	0.000375852	CD40, IL1RN, PTPN22, FZD10, FOXM1, TNF, GRAP2, PBK, TBC1D10C, TNFSF11, CCR7, MAP3K9, HAVCR2, UNC5CL, DUSP2, FGG, TRAF1, LAX1, ADRA2A, IL1A, TIAM1, NAIP6, BANK1, IL1B, CHIL1, ADAM8, TLR6, TNIK, TLR13, RAMP3, RGS14, TGFA, LPAR2, NOD2, PRDM11, PRKCZ, RASGRP1, CRACR2A, FGF23, CCL17, SLAMF1, TBX1, NTRK1, GM10591, CCL22, GPR55, OSM, L1CAM, SCIMP, MARCO, CD4, CD40LG, CD27, F2RL1	838	782	20051	1.65226	0.916128	0.00628837	0.00574844
KEGG_PATHWAY	mmu05310:Asthma	7	0.682927	0.000375912	H2-EB2, CD40, CD40LG, H2-OB, H2-OA, EPX, TNF	363	25	8998	6.94061	0.097551	0.00572221	0.00517923
GOTERM_BP_FAT	GO:0031399~regulation of protein modification process	115	11.2195	0.000400015	IL1RN, CD80, GFI1, CCNF, FZD10, TNF, CDC20, MTBP, GRAP2, MYB, TBC1D10C, ENPP1, TNFSF11, IL12A, MAP3K9, SKP2, TNFRSF4, UNC5CL, BORA, LAX1, FOXP3, TIAM1, CLDN3, CCNE2, NAIP6, CHIL1, ADAM8, TNIK, BLM, CDCA2, TGFA, CDCA8, LPAR2, GATA3, PRDM11, PRKCZ, SAMSN1, RASGRP1, CCNB2, CRACR2A, CCNB1, STAP1, CLSPN, ECT2, FGF23, SLAMF1, PROM2, GM10591, NFE2, STIL, LRRN3, PLK1, CDC6, L1CAM, MARCO, PKIB, TPX2, ITGB…	838	2008	20051	1.37033	0.928484	0.0066757	0.00610251
GOTERM_BP_FAT	GO:0051128~regulation of cellular component organization	162	15.8049	0.000402837	RIPOR2, PATJ, ZWILCH, GFI1, CCNF, IL1RAP, FZD10, CELSR1, MKI67, TNF, CDC14A, ZC3H12D, CDC20, MTBP, CDH1, TBC1D30, MYB, XLR4B, NUSAP1, ENPP1, NEK2, KNTC1, DLEU2, PLXNC1, NANOS1, WDHD1, BORA, DDX11, FOXP3, UNC13D, TIAM1, CH25H, ARC, CLDN4, CLDN3, CLDN7, PADI2, TNIK, KIF20B, TOX, SKAP1, CDKL1, RTN4R, PIF1, CDCA2, CDCA5, SHOX2, TACSTD2, TGFA, CDCA8, NCAPG, RASAL1, GATA3, SLAIN1, ARHGAP15, MEFV, PRDM1…	838	3007	20051	1.28906	0.929802	0.00670581	0.00613004
GOTERM_MF_FAT	GO:0004715~non-membrane spanning protein tyrosine kinase activity	9	0.878049	0.000411528	BLK, FGR, ITK, ZAP70, MELK, LCK, TXK, MATK, SLA	738	45	18102	4.90569	0.3722	0.0211563	0.0205951
GOTERM_BP_FAT	GO:2000516~positive regulation of CD4-positive, alpha-beta T cell activation	9	0.878049	0.000415469	CD160, MYB, CD28, CCR7, CD3E, FOXP3, NFKBID, PRKCZ, CARD11	838	44	20051	4.8942	0.935414	0.00685832	0.00626945
GOTERM_BP_FAT	GO:0090224~regulation of spindle organization	9	0.878049	0.000415469	TPX2, RIPOR2, STIL, BORA, SPAG5, PLK1, TACC3, SASS6, CCSAP	838	44	20051	4.8942	0.935414	0.00685832	0.00626945
GOTERM_BP_FAT	GO:0002208~somatic diversification of immunoglobulins involved in immune response	10	0.97561	0.000417201	CD40, CD40LG, ATAD5, TBX21, CD28, CCR6, FOXP3, AICDA, UNG, BATF	838	55	20051	4.3504	0.936147	0.00685832	0.00626945
GOTERM_BP_FAT	GO:0045190~isotype switching	10	0.97561	0.000417201	CD40, CD40LG, ATAD5, TBX21, CD28, CCR6, FOXP3, AICDA, UNG, BATF	838	55	20051	4.3504	0.936147	0.00685832	0.00626945
GOTERM_BP_FAT	GO:0002204~somatic recombination of immunoglobulin genes involved in immune response	10	0.97561	0.000417201	CD40, CD40LG, ATAD5, TBX21, CD28, CCR6, FOXP3, AICDA, UNG, BATF	838	55	20051	4.3504	0.936147	0.00685832	0.00626945
GOTERM_BP_FAT	GO:0051781~positive regulation of cell division	14	1.36585	0.000428384	MRGPRB1, CXCR5, TGFA, CDCA8, KIF23, CDC6, AURKB, CDC14A, IL1A, RACGAP1, IL1B, BIRC5, KIF20B, ECT2	838	105	20051	3.19029	0.940688	0.00702465	0.0064215
GOTERM_MF_FAT	GO:0032403~protein complex binding	53	5.17073	0.000435158	ACHE, ITGA2B, CCNF, PANX1, CDC20, POF1B, H2-OB, ITGAX, ENPP1, MADCAM1, H2-OA, SPDL1, GAS2L3, ITGA2, ADRA2A, FCAMR, FGR, NEIL3, JAML, LCK, CD8A, IL1B, COL6A4, CD226, FCER2A, ADAM8, MS4A1, PLCB2, H2-M2, H2-Q2, COCH, GNA14, FCHO1, SPP1, KLRC1, CLSPN, VILL, H2-EB2, CD160, PLK1, CORO2A, L1CAM, CENPE, ITGB2L, CD4, CENPF, CD40LG, CENPH, ABI3, KRT14, F2RL1, KLRD1, CDK5R1	738	789	18102	1.64767	0.388763	0.0213984	0.0208308
GOTERM_BP_FAT	GO:0002312~B cell activation involved in immune response	13	1.26829	0.000436357	CD40, ATAD5, FOXP3, AICDA, BATF, UNG, CD40LG, TBX21, CD19, CD28, ENPP1, CCR6, GAPT	838	92	20051	3.38102	0.943726	0.00713763	0.00652478
GOTERM_BP_FAT	GO:0051129~negative regulation of cellular component organization	59	5.7561	0.000444602	TOP2A, ZWILCH, GFI1, CCNF, BRCA1, TNF, ARHGAP4, CDC20, MTBP, CDH1, NUF2, TBC1D30, NEK2, KNTC1, DLEU2, SPDL1, CKAP2, PAX5, FOXP3, CH25H, KIFC1, IL1B, CLDN7, BIRC5, RTN4R, PIF1, SEMA3D, TACSTD2, CDCA8, NLRC3, MEFV, PRKCZ, AURKB, CCNB1, STAP1, VILL, CD300LF, BUB1, PACSIN1, PROM2, NFE2, CARMIL1, CARMIL2, STIL, BCL11A, PLK1, ATAD2, OSM, IL36G, SEMA4F, AICDA, NDC80, TPX2, CENPE, ABI3, TRIP13, SPC24, SP…	838	884	20051	1.59695	0.946705	0.00724622	0.00662405
GOTERM_BP_FAT	GO:0002286~T cell activation involved in immune response	16	1.56098	0.000445194	EOMES, LEF1, GATA3, PRKCZ, FOXP3, BATF, CRACR2A, TBX21, MYB, F2RL1, CCR7, SLAMF6, CLEC4E, NFKBID, IL18R1, HAVCR2	838	133	20051	2.87846	0.946913	0.00724622	0.00662405
GOTERM_BP_FAT	GO:0007126~meiotic nuclear division	21	2.04878	0.000466434	TOP2A, PLK1, FANCA, OSM, HASPIN, NDC80, RAD51AP1, CENPE, CCNB2, ASPM, RAD51, CCNE2, ESPL1, FIGNL1, NUF2, BIRC5, TRIP13, MYBL1, BUB1, CENPS, WNT4	838	208	20051	2.41573	0.953853	0.00757324	0.00692299
KEGG_PATHWAY	mmu04110:Cell cycle	15	1.46341	0.000478946	CDKN2A, PLK1, CDC7, CDC6, CDC14A, CCNA2, CDC20, CCNB2, CCNB1, DBF4, CCNE2, ESPL1, CDK1, SKP2, BUB1	363	125	8998	2.97455	0.122592	0.00690691	0.00625151
GOTERM_BP_FAT	GO:0050920~regulation of chemotaxis	23	2.2439	0.000481365	CX3CR1, RIPOR2, TNFSF14, SEMA3D, ITGA2, MST1, SEMA4F, NOD2, GREM1, TIAM1, SELL, IL1B, CXCR2, SLAMF8, PADI2, F2RL1, STAP1, CCR7, IL12A, CCR6, CCR4, GPR18, SLAMF1	838	240	20051	2.29302	0.958181	0.00779399	0.00712478
GOTERM_BP_FAT	GO:0000086~G2/M transition of mitotic cell cycle	16	1.56098	0.000482395	BARD1, MBD4, BLM, PLK1, CDC7, CDC6, BRCA1, FOXM1, AURKB, CCNA2, CCNB1, CDK1, RBBP8, BIRC5, CLSPN, SKP2	838	134	20051	2.85698	0.958464	0.00779399	0.00712478
GOTERM_BP_FAT	GO:0002369~T cell cytokine production	9	0.878049	0.000487049	IL18RAP, IL1B, TBX21, IL12A, GATA3, FOXP3, PRKCZ, IL18R1, SLAMF1	838	45	20051	4.78544	0.95972	0.00784995	0.00717594
GOTERM_BP_FAT	GO:0019220~regulation of phosphate metabolic process	108	10.5366	0.000490264	IL1RN, CD80, CCNF, FZD10, TNF, GRAP2, TBC1D10C, ENPP1, TNFSF11, IL12A, CD244A, MAP3K9, TNFRSF4, UNC5CL, BORA, LAX1, TIAM1, CLDN3, CCNE2, NAIP6, CHIL1, ADAM8, TNIK, BLM, CDCA2, TGFA, CDCA8, LPAR2, PRDM11, PRKCZ, SAMSN1, RASGRP1, CCNB2, CRACR2A, CCNB1, CD19, SLAMF8, STAP1, CLSPN, ECT2, FGF23, SLAMF1, PROM2, GM10591, BARD1, STIL, LRRN3, PLK1, CDC6, L1CAM, MARCO, PKIB, TPX2, ITGB2L, CDK1, CD27, LAT, …	838	1872	20051	1.38042	0.960565	0.00788249	0.00720568
GOTERM_BP_FAT	GO:0033083~regulation of immature T cell proliferation	6	0.585366	0.000509456	IL1A, BLM, CDKN2A, IL1B, TNFRSF9, FOXP3	838	17	20051	8.4449	0.965254	0.00817015	0.00746865
GOTERM_BP_FAT	GO:0006310~DNA recombination	28	2.73171	0.000510634	TOP2A, PIF1, BLM, CD40, LEF1, TONSL, CGAS, BRCA1, UNG, RAD51AP1, TBX21, FIGNL1, RBBP8, CCR6, BARD1, RMI2, BCL11B, ATAD5, CDC7, FOXP3, AICDA, BATF, MMS22L, RAD51, CD40LG, CD28, TRIP13, CENPS	838	323	20051	2.07419	0.965523	0.00817015	0.00746865
GOTERM_BP_FAT	GO:0071900~regulation of protein serine/threonine kinase activity	35	3.41463	0.000519896	BLM, CD40, IL1RN, RGS14, CCNF, TGFA, PTPN22, FZD10, NOD2, RASGRP1, TNF, CCNB2, CCNB1, TNFSF11, CCR7, MAP3K9, DUSP2, STIL, CDKN2A, PLK1, MST1, CDC6, PROX1, LAX1, ADRA2A, CCNA2, PKIB, TIAM1, CD40LG, CCNE2, IL1B, CHIL1, ADAM8, TLR6, TNIK	838	444	20051	1.88615	0.967566	0.00828296	0.00757177
GOTERM_BP_FAT	GO:0036037~CD8-positive, alpha-beta T cell activation	8	0.780488	0.000520198	EOMES, CD244A, PTPN22, TNFSF8, TOX, RUNX3, GPR18, RUNX1	838	35	20051	5.46908	0.967631	0.00828296	0.00757177
GOTERM_BP_FAT	GO:0071621~granulocyte chemotaxis	16	1.56098	0.000522222	GM10591, RIPOR2, CCL22, NOD2, TREM3, CXCL15, ITGB2L, JAML, SELL, IL1B, CXCR2, SPP1, CCR7, CCL17, CCR3, SLAMF1	838	135	20051	2.83582	0.96806	0.00829514	0.00758291
GOTERM_BP_FAT	GO:0045123~cellular extravasation	12	1.17073	0.000528115	CX3CR1, RIPOR2, ITGB2L, FUT7, SELL, JAML, MADCAM1, ADAM8, TREM3, TNF, CHST2, FUT4	838	81	20051	3.54477	0.969278	0.00836859	0.00765005
GOTERM_BP_FAT	GO:0032103~positive regulation of response to external stimulus	31	3.02439	0.000535321	CX3CR1, RIPOR2, NOD2, MEFV, TNF, CXCR2, TNFSF11, IL12A, CCR7, CCR6, CCR4, OASL1, SLAMF1, HAVCR2, TNFSF14, VDR, ITGA2, OSM, SCIMP, IL17RB, TIAM1, CD6, SELL, IL1B, TARM1, CD28, LTA, F2RL1, ADAM8, TLR6, IDO1	838	375	20051	1.97798	0.970704	0.00846243	0.00773583
GOTERM_BP_FAT	GO:0051174~regulation of phosphorus metabolic process	108	10.5366	0.000536827	IL1RN, CD80, CCNF, FZD10, TNF, GRAP2, TBC1D10C, ENPP1, TNFSF11, IL12A, CD244A, MAP3K9, TNFRSF4, UNC5CL, BORA, LAX1, TIAM1, CLDN3, CCNE2, NAIP6, CHIL1, ADAM8, TNIK, BLM, CDCA2, TGFA, CDCA8, LPAR2, PRDM11, PRKCZ, SAMSN1, RASGRP1, CCNB2, CRACR2A, CCNB1, CD19, SLAMF8, STAP1, CLSPN, ECT2, FGF23, SLAMF1, PROM2, GM10591, BARD1, STIL, LRRN3, PLK1, CDC6, L1CAM, MARCO, PKIB, TPX2, ITGB2L, CDK1, CD27, LAT, …	838	1877	20051	1.37674	0.970994	0.00846595	0.00773905
GOTERM_BP_FAT	GO:0051338~regulation of transferase activity	60	5.85366	0.000551077	CD40, IL1RN, FLT3, CCNF, PTPN22, FZD10, TNF, CDC20, TNFSF11, NEK2, CCR7, MAP3K9, TNFRSF4, DUSP2, BORA, MST1, PROX1, LAX1, ADRA2A, CCNA2, GREM1, FGR, TIAM1, CCNE2, IL1B, CHIL1, ADAM8, TLR6, TNIK, PIF1, BLM, RGS14, TGFA, NOD2, PRKCZ, LRP8, RASGRP1, AURKB, CCNB2, CCNB1, ERBB3, CD19, SLAMF8, STAP1, CLSPN, ECT2, NTRK1, STIL, CDKN2A, GINS3, PLK1, CDC6, TPX2, PKIB, CENPE, CD4, CD40LG, ABI3, LAT, CDK5R1	838	911	20051	1.57589	0.973596	0.00866993	0.00792552
GOTERM_BP_FAT	GO:0009966~regulation of signal transduction	165	16.0976	0.000556569	FOXA1, RIPOR2, FCMR, IL1RN, GFI1, SLA, FZD10, SLA2, TNF, GPR174, CDH1, RGS1, GRAP2, TBC1D10C, ENPP1, TNFSF11, IL12A, UBASH3A, MAP3K9, SKP2, TNFRSF4, RNF43, UNC5CL, CISH, IL1R2, SHISA3, IFT80, RUNX3, LAX1, RUNX2, RUNX1, TIAM1, ARC, DEPDC1B, NAIP6, RRAGB, CD8A, CHIL1, PADI2, CD226, ADAM8, TNIK, GM6377, CARD11, RTN4R, BLK, TEDC1, TXK, SHOX2, DTX1, TGFA, LPAR2, RASAL1, GATA3, P2RY10B, PRDM11, RASAL3,…	838	3096	20051	1.27519	0.974536	0.00873549	0.00798544
GOTERM_BP_FAT	GO:0045860~positive regulation of protein kinase activity	35	3.41463	0.000563756	CD40, IL1RN, TGFA, FZD10, NOD2, PRKCZ, LRP8, RASGRP1, TNF, ERBB3, STAP1, TNFSF11, CCR7, MAP3K9, CLSPN, ECT2, STIL, BORA, CDC6, PROX1, ADRA2A, GREM1, CENPE, TIAM1, TPX2, CD4, CD40LG, ABI3, IL1B, CHIL1, ADAM8, TLR6, TNIK, LAT, CDK5R1	838	446	20051	1.8777	0.975715	0.00882727	0.00806934
GOTERM_BP_FAT	GO:0002347~response to tumor cell	9	0.878049	0.000568304	CD40LG, KLRK1, ABI3, CD160, PRF1, CD226, IL12A, ULBP1, HAVCR2	838	46	20051	4.68141	0.976433	0.00887739	0.00811516
GOTERM_BP_FAT	GO:0002224~toll-like receptor signaling pathway	15	1.46341	0.000572578	TASL, CD40, PTPN22, NOD2, OAS1C, TNF, SCIMP, TREML4, TLR12, TLR11, F2RL1, TLR6, CD300LF, TLR13, HAVCR2	838	122	20051	2.94187	0.977088	0.00890197	0.00813763
GOTERM_BP_FAT	GO:0032652~regulation of interleukin-1 production	15	1.46341	0.000572578	CX3CR1, ARG2, IFI206, IL1R2, NLRC3, NOD2, NLRC4, MEFV, TNF, PANX1, F2RL1, CCR7, TLR6, FFAR1, HAVCR2	838	122	20051	2.94187	0.977088	0.00890197	0.00813763
GOTERM_BP_FAT	GO:0033674~positive regulation of kinase activity	39	3.80488	0.000578035	CD40, IL1RN, FLT3, TGFA, FZD10, NOD2, PRKCZ, LRP8, RASGRP1, TNF, ERBB3, CD19, STAP1, TNFSF11, CCR7, MAP3K9, CLSPN, ECT2, NTRK1, STIL, BORA, CDC6, PROX1, ADRA2A, GREM1, FGR, CENPE, TIAM1, TPX2, CD4, CD40LG, ABI3, IL1B, CHIL1, ADAM8, TLR6, TNIK, LAT, CDK5R1	838	518	20051	1.80147	0.977898	0.00896567	0.00819586
GOTERM_BP_FAT	GO:0050857~positive regulation of antigen receptor-mediated signaling pathway	7	0.682927	0.000583795	TESPA1, TRAT1, STAP1, CD226, CCR7, KCNN4, CARD11	838	26	20051	6.44194	0.978722	0.0090126	0.00823876
GOTERM_BP_FAT	GO:0050860~negative regulation of T cell receptor signaling pathway	7	0.682927	0.000583795	PVRIG, CD160, SH2D1A, PTPN22, UBASH3A, BTNL2, SLA2	838	26	20051	6.44194	0.978722	0.0090126	0.00823876
GOTERM_BP_FAT	GO:0016310~phosphorylation	132	12.878	0.000588059	IL1RN, CD80, CCNF, FZD10, SLA2, TNF, GRAP2, TBC1D10C, ENPP1, TNFSF11, IL12A, NEK2, MAP3K9, TNFRSF4, STK32C, UNC5CL, BORA, CISH, MATK, HASPIN, RUNX3, LAX1, TIAM1, MELK, CLDN3, CCNE2, NAIP6, CHIL1, ADAM8, TNIK, CDKL1, BLK, BLM, TXK, TGFA, CDCA8, LPAR2, PRDM11, PRKCZ, SAMSN1, RASGRP1, CCNB2, CRACR2A, CCNB1, NUAK2, CD19, SLAMF8, STAP1, CLSPN, ECT2, FGF23, SLAMF1, PROM2, GM10591, STIL, LRRN3, PLK1, DC…	838	2389	20051	1.32206	0.979312	0.00905721	0.00827954
KEGG_PATHWAY	mmu04380:Osteoclast differentiation	15	1.46341	0.000609721	LILRA6, SIRPB1B, SIRPB1A, PIRA13, PIRA12, TNF, MAPK13, IL1A, LCK, CAMK4, IL1B, BLNK, TNFSF11, GM9733, SIRPB1C	363	128	8998	2.90483	0.153381	0.00835318	0.00756054
GOTERM_BP_FAT	GO:0009967~positive regulation of signal transduction	99	9.65854	0.00062044	FOXA1, IL1RN, GFI1, FZD10, TNF, GPR174, TNFSF11, IL12A, MAP3K9, SKP2, UNC5CL, RUNX3, TIAM1, ARC, DEPDC1B, NAIP6, RRAGB, CD8A, CHIL1, CD226, ADAM8, TNIK, CARD11, RTN4R, TEDC1, TXK, SHOX2, TGFA, LPAR2, GATA3, P2RY10B, PRKCZ, RASGRP1, CRACR2A, TESPA1, PMAIP1, STAP1, KCNN4, SLC15A3, CD300LF, FGF23, BCL2L14, SLAMF1, GM10591, TNFSF14, VDR, L1CAM, MARCO, TREML4, CD28, CD27, IL7R, GPR18, CD40, TRIM30B, T…	838	1699	20051	1.39423	0.983291	0.00953366	0.00871508
GOTERM_BP_FAT	GO:0002534~cytokine production involved in inflammatory response	10	0.97561	0.000625012	CD96, CD6, IL1R2, TARM1, NLRC3, NOD2, TLR6, MEFV, TNF, IDO1	838	58	20051	4.12538	0.983788	0.00958158	0.00875889
GOTERM_CC_FAT	GO:0015630~microtubule cytoskeleton	88	8.58537	0.000652306	TOP2A, PATJ, CCNF, BRCA1, KIF11, CDC14A, ARHGAP4, KIF15, GPR174, CDC20, TBC1D30, PCLAF, NUSAP1, RTTN, NEK2, KNTC1, SPDL1, GTSE1, DLGAP5, CEP55, GAS2L3, BORA, CKAP2L, CEP295, DDX11, CKAP2, KCTD1, KIF23, IFT80, KIF22, HASPIN, CCSAP, KNSTRN, IL17RB, KIF4, ASPM, TIAM1, ESPL1, CCNE2, KIFC1, LCK, BIRC5, KIF2C, HAP1, KIF20A, KIF20B, TEDC1, RGS14, CDCA8, NLRC3, HMMR, SLAIN1, MEFV, PRKCZ, LRP8, AURKB, CCN…	743	1391	16713	1.42305	0.360023	0.0171607	0.0162575
GOTERM_BP_FAT	GO:0031098~stress-activated protein kinase signaling cascade	26	2.53659	0.000664377	IL1RN, PTPN22, FZD10, NOD2, FOXM1, RASGRP1, TNF, CRACR2A, PBK, TNFSF11, CCR7, MAP3K9, SLAMF1, UNC5CL, TRAF1, SCIMP, MAPK13, TIAM1, IL1A, CD40LG, NAIP6, IL1B, F2RL1, CD27, TLR6, TNIK	838	295	20051	2.10884	0.987496	0.0101614	0.00928894
GOTERM_BP_FAT	GO:0002275~myeloid cell activation involved in immune response	15	1.46341	0.000674664	BLK, CX3CR1, MRGPRB1, RASGRP1, UNC13D, FGR, RAB44, ITGB2L, NR4A3, F2RL1, IL13RA2, DNASE1L3, LAT, SLAMF1, HAVCR2	838	124	20051	2.89442	0.988316	0.0102949	0.00941093
GOTERM_BP_FAT	GO:0050862~positive regulation of T cell receptor signaling pathway	6	0.585366	0.000681302	TESPA1, TRAT1, CD226, CCR7, KCNN4, CARD11	838	18	20051	7.97574	0.988817	0.0103507	0.00946193
GOTERM_BP_FAT	GO:0002698~negative regulation of immune effector process	18	1.7561	0.00068146	CD96, CR2, PGLYRP2, NOD2, EPX, TNF, FOXP3, SIGLECG, VPREB3, TBX21, SLAMF8, KLRD1, KLRC1, IL13RA2, IL7R, CD22, SLAMF1, HAVCR2	838	168	20051	2.56363	0.988829	0.0103507	0.00946193
GOTERM_BP_FAT	GO:0055074~calcium ion homeostasis	40	3.90244	0.000684727	CX3CR1, CD40, RAMP3, FPR1, CXCR5, P2RY10B, CACNA1E, GPR174, CACNA1I, TRPM2, NT5E, CD19, CXCR2, SPP1, CCR8, ENPP1, TNFSF11, CCR7, CCR6, FFAR1, FGF23, CCR4, CCR3, TFAP2B, P2RY10, XCR1, FCRL5, VDR, GPR35, GPR55, CD4, XK, LCK, IL1B, ACKR4, F2RL1, HAP1, MS4A1, GPR18, ATP6V1B1	838	541	20051	1.76911	0.989067	0.0103764	0.00948543
KEGG_PATHWAY	mmu05202:Transcriptional misregulation in cancer	21	2.04878	0.000690226	NTRK1, ARNT2, CD40, SLC45A3, BCL11B, CEBPE, FLT3, IL1R2, TMPRSS2, GZMB, PAX5, TRAF1, MPO, RUNX2, BAIAP3, RUNX1, CCNA2, NR4A3, SPINT1, BCL2A1A, BCL2A1B	363	224	8998	2.32386	0.171797	0.00859827	0.00778238
KEGG_PATHWAY	mmu05323:Rheumatoid arthritis	12	1.17073	0.000690372	H2-EB2, IL1A, ITGB2L, IL1B, CD80, CD28, H2-OB, TNFSF11, CTLA4, H2-OA, TNF, ATP6V1B1	363	87	8998	3.41902	0.17183	0.00859827	0.00778238
GOTERM_BP_FAT	GO:0007204~positive regulation of cytosolic calcium ion concentration	30	2.92683	0.000701728	CX3CR1, RAMP3, FPR1, CXCR5, P2RY10B, CACNA1E, GPR174, CACNA1I, TRPM2, CD19, CXCR2, CCR8, CCR7, CCR6, FFAR1, CCR4, CCR3, P2RY10, XCR1, FCRL5, GPR35, GPR55, CD4, LCK, IL1B, ACKR4, F2RL1, HAP1, MS4A1, GPR18	838	364	20051	1.97202	0.990227	0.0106096	0.00969866
GOTERM_BP_FAT	GO:0032816~positive regulation of natural killer cell activation	8	0.780488	0.000740741	CD160, CD244A, IL12A, KLRC1, IL12RB1, TOX, ULBP1, RASGRP1	838	37	20051	5.17345	0.992445	0.0111434	0.0101866
GOTERM_BP_FAT	GO:0050999~regulation of nitric-oxide synthase activity	8	0.780488	0.000740741	DHFR, IL1A, ARG2, GCH1, CNR2, IL1B, FCER2A, TNF	838	37	20051	5.17345	0.992445	0.0111434	0.0101866
GOTERM_BP_FAT	GO:0012501~programmed cell death	120	11.7073	0.000742104	FOXA1, FCMR, IL1RN, PRF1, TNF, IKZF3, CDH1, CLEC5A, ENPP1, TNFRSF8, IL12A, MAP3K9, SKP2, TNFRSF4, RUNX3, TIAM1, MELK, NAIP6, CLDN7, CHIL1, ADAM8, RNF122, CARD11, IDO1, BLK, BLM, CDCA7, TGFA, GATA3, MEFV, PRDM11, PRKCZ, NUGGC, KLRK1, NUAK2, FIGNL1, PMAIP1, EVI2, ECT2, CLCA3A2, BCL2L14, WNT4, BARD1, TFAP2B, STIL, EGR3, BCL11B, VDR, CD160, TNFRSF9, PLK1, EAF2, TPX2, NR4A3, SELL, CD28, CDK1, CD27, IL…	838	2147	20051	1.33734	0.992512	0.0111434	0.0101866
GOTERM_BP_FAT	GO:0006915~apoptotic process	114	11.122	0.0007444	FOXA1, FCMR, IL1RN, PRF1, TNF, CDH1, CLEC5A, ENPP1, TNFRSF8, IL12A, MAP3K9, TNFRSF4, RUNX3, TIAM1, MELK, NAIP6, CLDN7, CHIL1, ADAM8, RNF122, IDO1, BLK, BLM, CDCA7, TGFA, GATA3, PRDM11, PRKCZ, NUGGC, KLRK1, NUAK2, FIGNL1, PMAIP1, EVI2, ECT2, CLCA3A2, BCL2L14, WNT4, BARD1, TFAP2B, STIL, EGR3, BCL11B, VDR, CD160, TNFRSF9, PLK1, EAF2, TPX2, NR4A3, CD28, CDK1, CD27, IL7R, NFKBID, TOP2A, CD40, CD3G, BR…	838	2021	20051	1.34968	0.992625	0.0111525	0.0101949
KEGG_PATHWAY	mmu05235:PD-L1 expression and PD-1 checkpoint pathway in cancer	12	1.17073	0.000761218	ZAP70, CD4, LCK, CD28, CD3G, PDCD1, CD3E, CD3D, RASGRP1, LAT, BATF, MAPK13	363	88	8998	3.38017	0.187705	0.00869057	0.00786592
KEGG_PATHWAY	mmu05416:Viral myocarditis	12	1.17073	0.000761218	H2-EB2, CD40, ITGB2L, CD40LG, CD80, H2-M2, PRF1, CD28, H2-OB, H2-Q2, H2-OA, H2-T-PS	363	88	8998	3.38017	0.187705	0.00869057	0.00786592
GOTERM_CC_FAT	GO:0005874~microtubule	37	3.60976	0.000764206	RGS14, SLAIN1, KIF11, MEFV, AURKB, ARHGAP4, KIF15, HAUS8, MAP7, NUSAP1, NEK2, KNTC1, GTSE1, GAS2L3, SPAG5, CEP295, PLK1, CKAP2, KIF23, KIF22, CCSAP, KNSTRN, KIF4, CENPE, TIAM1, ASPM, TPX2, KIF18B, TTLL3, HOOK1, KIFC1, PRC1, CDK1, BIRC5, KIF2C, KIF20A, KIF20B	743	461	16713	1.80537	0.407211	0.0193599	0.018341
GOTERM_BP_FAT	GO:0010639~negative regulation of organelle organization	36	3.5122	0.000770538	TOP2A, PIF1, ZWILCH, CCNF, TACSTD2, CDCA8, BRCA1, AURKB, CDC20, MTBP, CCNB1, TBC1D30, NUF2, NEK2, KNTC1, VILL, SPDL1, BUB1, CARMIL1, CARMIL2, STIL, PLK1, ATAD2, CKAP2, OSM, PAX5, FOXP3, AICDA, NDC80, CENPE, TPX2, KIFC1, BIRC5, TRIP13, SPC24, SPC25	838	472	20051	1.82496	0.993793	0.0115179	0.0105289
GOTERM_BP_FAT	GO:0032675~regulation of interleukin-6 production	18	1.7561	0.00077924	FLT3, IL36G, PTPN22, NLRC3, NOD2, IL1RAP, POU2F2, TNF, SCIMP, FOXP3, MAPK13, IL1A, BANK1, IL1B, F2RL1, TLR6, SLAMF1, HAVCR2	838	170	20051	2.53347	0.99414	0.0116216	0.0106238
GOTERM_BP_FAT	GO:0016445~somatic diversification of immunoglobulins	11	1.07317	0.000782434	CD40, CD40LG, ATAD5, TBX21, CD28, CCR6, FOXP3, NUGGC, AICDA, UNG, BATF	838	72	20051	3.65555	0.994262	0.0116429	0.0106432
GOTERM_BP_FAT	GO:0002676~regulation of chronic inflammatory response	5	0.487805	0.000786232	CX3CR1, LTA, FOXP3, TNF, IDO1	838	11	20051	10.876	0.994404	0.0116468	0.0106468
GOTERM_BP_FAT	GO:0002855~regulation of natural killer cell mediated immune response to tumor cell	5	0.487805	0.000786232	KLRK1, CD160, CD226, IL12A, HAVCR2	838	11	20051	10.876	0.994404	0.0116468	0.0106468
GOTERM_BP_FAT	GO:1902531~regulation of intracellular signal transduction	106	10.3415	0.000805916	RIPOR2, IL1RN, FZD10, SLA2, TNF, GPR174, GRAP2, TBC1D10C, TNFSF11, IL12A, MAP3K9, UNC5CL, LAX1, TIAM1, NAIP6, RRAGB, CD8A, CHIL1, ADAM8, TNIK, CARD11, RTN4R, TGFA, LPAR2, RASAL1, GATA3, P2RY10B, PRDM11, RASAL3, PRKCZ, RASGRP1, CRACR2A, FIGNL1, PMAIP1, SLC15A3, FGF23, SLAMF1, GM10591, TNFSF14, L1CAM, MARCO, CD28, CD27, IL7R, NFKBID, GPR18, CD22, CD40, TRIM30B, TRIM30C, CGAS, PTPN22, FOXM1, CD3E, S…	838	1858	20051	1.36506	0.995085	0.0119117	0.0108889
GOTERM_CC_FAT	GO:0005923~bicellular tight junction	17	1.65854	0.00083467	PATJ, ILDR1, FRMD4A, PRKCZ, CLDN11, EPB41L4B, CLDN4, CLDN3, JAML, SAPCD2, MARVELD2, POF1B, EPCAM, CLDN8, CLDN7, ECT2, TJP3	743	147	16713	2.60134	0.435126	0.0200834	0.0190264
GOTERM_CC_FAT	GO:0044427~chromosomal part	77	7.5122	0.00085149	TOP2A, ERCC6L, ZWILCH, TONSL, CGAS, MCM10, BRCA1, MKI67, XLR4A, MTBP, CHAF1B, CHAF1A, XLR4C, NUF2, XLR4B, MYBL2, NEK2, KNTC1, SPDL1, POLE, EOMES, WDHD1, HELLS, RMI2, DDX11, RFX3, DNTT, KNL1, KIF22, KNSTRN, RUNX3, RUNX2, RUNX1, MMS22L, BIRC5, PADI2, KIF2C, DNA2, SINHCAF, PIF1, BLM, UHRF1, PRIM1, CDCA5, CDCA8, NCAPG, GATA3, SLFN9, CENPA, NSL1, AURKB, RAD51AP1, CCNB1, DSN1, RBBP8, BUB1, MBD4, ATAD5,…	743	1192	16713	1.45305	0.441593	0.0200834	0.0190264
GOTERM_BP_FAT	GO:0002833~positive regulation of response to biotic stimulus	11	1.07317	0.000873341	CD40LG, KLRK1, CD160, F2RL1, CD226, IL12A, NOD2, SCIMP, ULBP1, OASL1, HAVCR2	838	73	20051	3.60547	0.99685	0.0127935	0.011695
GOTERM_BP_FAT	GO:0046637~regulation of alpha-beta T cell differentiation	11	1.07317	0.000873341	ZAP70, TBX21, MYB, CCR7, GATA3, PRDM1, FOXP3, NFKBID, PRKCZ, RUNX3, RUNX1	838	73	20051	3.60547	0.99685	0.0127935	0.011695
GOTERM_BP_FAT	GO:0000079~regulation of cyclin-dependent protein serine/threonine kinase activity	11	1.07317	0.000873341	CCNA2, CCNB2, BLM, STIL, CCNB1, CCNE2, CDKN2A, CCNF, PLK1, PROX1, CDC6	838	73	20051	3.60547	0.99685	0.0127935	0.011695
GOTERM_BP_FAT	GO:0046579~positive regulation of Ras protein signal transduction	11	1.07317	0.000873341	NTRK1, RTN4R, GPR174, P2RY10, GPR35, GPR55, LPAR2, F2RL1, P2RY10B, RASGRP1, GPR18	838	73	20051	3.60547	0.99685	0.0127935	0.011695
GOTERM_BP_FAT	GO:0002710~negative regulation of T cell mediated immunity	7	0.682927	0.000889662	TBX21, KLRD1, KLRC1, NOD2, IL7R, FOXP3, SLAMF1	838	28	20051	5.9818	0.997172	0.0129672	0.0118538
GOTERM_BP_FAT	GO:0002407~dendritic cell chemotaxis	6	0.585366	0.000893071	TRPM2, SLAMF8, CCR7, IL12A, CCR6, SLAMF1	838	19	20051	7.55596	0.997235	0.0129672	0.0118538
GOTERM_BP_FAT	GO:0032695~negative regulation of interleukin-12 production	6	0.585366	0.000893071	CCR7, NLRC3, NOD2, MEFV, TIGIT, SLAMF1	838	19	20051	7.55596	0.997235	0.0129672	0.0118538
GOTERM_BP_FAT	GO:0050855~regulation of B cell receptor signaling pathway	6	0.585366	0.000893071	BLK, FCRL5, CD19, STAP1, GCSAM, CD22	838	19	20051	7.55596	0.997235	0.0129672	0.0118538
GOTERM_BP_FAT	GO:0045620~negative regulation of lymphocyte differentiation	10	0.97561	0.00091062	PGLYRP2, CDKN2A, FLT3, TBX21, DTX1, CTLA4, FOXP3, NFKBID, RUNX3, RUNX1	838	61	20051	3.92249	0.997537	0.0131641	0.0120338
GOTERM_BP_FAT	GO:0033003~regulation of mast cell activation	10	0.97561	0.00091062	BLK, FGR, PTPRE, NR4A3, CNR2, CD226, HAVCR1, IL13RA2, CD300LF, UNC13D	838	61	20051	3.92249	0.997537	0.0131641	0.0120338
KEGG_PATHWAY	mmu04612:Antigen processing and presentation	12	1.17073	0.000921088	H2-EB2, CD4, CD8A, H2-M2, H2-OB, CD8B1, KLRD1, H2-Q2, KLRC1, H2-OA, H2-T-PS, TNF	363	90	8998	3.30505	0.222423	0.0100951	0.00913719
GOTERM_BP_FAT	GO:0050764~regulation of phagocytosis	15	1.46341	0.000925551	GM5150, SIRPB1B, SIRPB1A, ITGA2, NOD2, TNF, FGR, IL1B, F2RL1, STAP1, CCR7, PTX3, GM9733, CD300LF, SIRPB1C	838	128	20051	2.80397	0.997768	0.0133506	0.0122043
GOTERM_BP_FAT	GO:0051341~regulation of oxidoreductase activity	13	1.26829	0.000932675	ARG2, GCH1, VDR, GFI1, NOD2, TNF, DHFR, IL1A, CNR2, IL1B, SLAMF8, FCER2A, FGF23	838	100	20051	3.11054	0.997871	0.0133656	0.012218
GOTERM_BP_FAT	GO:0032611~interleukin-1 beta production	13	1.26829	0.000932675	CX3CR1, IFI206, NLRC3, NOD2, NLRC4, MEFV, TNF, PANX1, IL1B, F2RL1, CCR7, TLR6, FFAR1	838	100	20051	3.11054	0.997871	0.0133656	0.012218
GOTERM_BP_FAT	GO:0032651~regulation of interleukin-1 beta production	13	1.26829	0.000932675	CX3CR1, ARG2, IFI206, NLRC3, NOD2, NLRC4, MEFV, TNF, PANX1, F2RL1, CCR7, TLR6, FFAR1	838	100	20051	3.11054	0.997871	0.0133656	0.012218
GOTERM_MF_FAT	GO:0015026~coreceptor activity	7	0.682927	0.000949658	FCRL1, CD4, GPR15, RAMP3, CD80, CD8B1, CD22	738	29	18102	5.92066	0.658557	0.0447526	0.0435656
GOTERM_CC_FAT	GO:0005911~cell-cell junction	37	3.60976	0.000951018	ITK, PATJ, KCNA2, ILDR1, CD3E, PRKCZ, AQP3, PANX1, EPB41L4B, MARVELD2, POF1B, CDH1, EPCAM, ECT2, DSP, CARMIL2, THEMIS, KAZN, FRMD4A, CLDN11, TIAM1, ZAP70, CLDN4, CLDN3, JAML, SAPCD2, LCK, CLDN8, CLDN7, DSG2, PKP3, HAMP, DSC2, SKAP1, LAT, TJP3, DSC3	743	467	16713	1.78218	0.478375	0.0216832	0.020542
GOTERM_BP_FAT	GO:0070374~positive regulation of ERK1 and ERK2 cascade	22	2.14634	0.000985233	NTRK1, GM10591, CCL22, RAMP3, FGG, GPR55, PTPN22, NOD2, PRKCZ, SCIMP, RASGRP1, MARCO, IL1A, CD4, IL1B, CHIL1, F2RL1, TNFSF11, CCL17, FGF23, SLAMF1, HAVCR2	838	237	20051	2.22109	0.998495	0.0140882	0.0128786
KEGG_PATHWAY	mmu05169:Epstein-Barr virus infection	21	2.04878	0.00100889	H2-EB2, CR2, CD40, H2-M2, H2-Q2, CD3G, H2-T-PS, CD3E, TNF, RUNX3, CD3D, MAPK13, CCNA2, CCNE2, OAS3, CD19, BLNK, H2-OB, FCER2A, H2-OA, SKP2	363	231	8998	2.25344	0.240858	0.0106322	0.00962328
GOTERM_BP_FAT	GO:0007200~phospholipase C-activating G-protein coupled receptor signaling pathway	13	1.26829	0.0010191	CX3CR1, P2RY10, GPR35, GPR55, FPR1, P2RY10B, ADRA2A, GPR174, GNA14, CXCR2, F2RL1, PLCB2, GPR18	838	101	20051	3.07974	0.998796	0.0145409	0.0132924
GOTERM_BP_FAT	GO:0002573~myeloid leukocyte differentiation	23	2.2439	0.00102489	IFI206, GPR68, CEBPE, TESC, LEF1, GPR55, GAB3, GATA3, TNF, BATF, RUNX1, SPIB, CD4, CAMK4, ENPP1, F2RL1, TNFSF11, CCR7, CLEC2I, ADAM8, EVI2, CD300LF, CD101	838	254	20051	2.16664	0.998841	0.0145919	0.0133391
GOTERM_BP_FAT	GO:0002724~regulation of T cell cytokine production	8	0.780488	0.00102934	CENPF, IL1B, TBX21, GATA3, FOXP3, PRKCZ, IL18R1, SLAMF1	838	39	20051	4.90815	0.998875	0.0146237	0.0133681
GOTERM_BP_FAT	GO:0045597~positive regulation of cell differentiation	75	7.31707	0.00108218	FOXA1, ACHE, RIPOR2, TENM3, GPR68, GFI1, TNF, RNF157, MYB, XLR4B, TNFSF11, IL12A, CCR7, PLXNC1, TESC, RFX3, RHOH, CIP2A, PROX1, FOXP3, RUNX3, UNC13D, RUNX2, ZDHHC15, RUNX1, GREM1, ASPM, IL1A, TIAM1, ZAP70, SPINT1, LCK, IL1B, LTA, ADAM8, HAP1, TNIK, KIF20B, TOX, CD101, CX3CR1, BLM, RGS14, LEF1, SHOX2, TACSTD2, RASAL1, GATA3, PRKCZ, LRP8, RASGRP1, TESPA1, EVI2, ECT2, WNT4, PACSIN1, TBX1, NTRK1, CAR…	838	1235	20051	1.45307	0.999206	0.015314	0.0139991
GOTERM_BP_FAT	GO:0002837~regulation of immune response to tumor cell	7	0.682927	0.00108257	CD40LG, KLRK1, CD160, CD226, IL12A, ULBP1, HAVCR2	838	29	20051	5.77553	0.999208	0.015314	0.0139991
GOTERM_MF_FAT	GO:0050839~cell adhesion molecule binding	24	2.34146	0.00110432	DSP, TENM3, GLYCAM1, ITGA2, ITGA2B, FGG, L1CAM, ITGB2L, CD40LG, JAML, SELL, CDH1, EPCAM, IL1B, CLDN7, SPP1, ITGAX, CD226, MADCAM1, DSG2, ADAM8, PKP3, TJP3, CDK5R1	738	279	18102	2.10997	0.713401	0.0499592	0.0486341
GOTERM_BP_FAT	GO:1903046~meiotic cell cycle process	21	2.04878	0.00111656	TOP2A, PLK1, FANCA, OSM, HASPIN, NDC80, RAD51AP1, CENPE, CCNB2, ASPM, RAD51, CCNE2, ESPL1, FIGNL1, NUF2, BIRC5, TRIP13, MYBL1, BUB1, CENPS, WNT4	838	223	20051	2.25323	0.999367	0.015761	0.0144077
GOTERM_BP_FAT	GO:2000508~regulation of dendritic cell chemotaxis	5	0.487805	0.00114054	SLAMF8, CCR7, IL12A, CCR6, SLAMF1	838	12	20051	9.96967	0.99946	0.0159288	0.0145612
GOTERM_BP_FAT	GO:0034154~toll-like receptor 7 signaling pathway	5	0.487805	0.00114054	TASL, TREML4, PTPN22, SCIMP, HAVCR2	838	12	20051	9.96967	0.99946	0.0159288	0.0145612
GOTERM_BP_FAT	GO:0001660~fever generation	5	0.487805	0.00114054	IL1A, IL1RN, IL1B, TNFSF11, TNF	838	12	20051	9.96967	0.99946	0.0159288	0.0145612
GOTERM_BP_FAT	GO:0051987~positive regulation of attachment of spindle microtubules to kinetochore	5	0.487805	0.00114054	CENPE, CCNB1, CDCA8, BIRC5, AURKB	838	12	20051	9.96967	0.99946	0.0159288	0.0145612
GOTERM_BP_FAT	GO:0002423~natural killer cell mediated immune response to tumor cell	5	0.487805	0.00114054	KLRK1, CD160, CD226, IL12A, HAVCR2	838	12	20051	9.96967	0.99946	0.0159288	0.0145612
GOTERM_BP_FAT	GO:0043374~CD8-positive, alpha-beta T cell differentiation	6	0.585366	0.00115017	EOMES, TNFSF8, TOX, RUNX3, GPR18, RUNX1	838	20	20051	7.17816	0.999493	0.0159956	0.0146222
GOTERM_BP_FAT	GO:0042359~vitamin D metabolic process	6	0.585366	0.00115017	VDR, IL1B, GFI1, ENPP1, TNF, FGF23	838	20	20051	7.17816	0.999493	0.0159956	0.0146222
GOTERM_BP_FAT	GO:0050830~defense response to Gram-positive bacterium	19	1.85366	0.00117556	EAR6, GBP8, PGLYRP2, STAB2, NOD2, TNF, FGR, KLRK1, RNASE2A, IL1B, LTA, 2610528A11RIK, CTSG, TNFSF8, IL12A, EAR1, IL7R, HAMP, HAVCR2	838	192	20051	2.3678	0.999571	0.0163142	0.0149135
GOTERM_CC_FAT	GO:0005694~chromosome	86	8.39024	0.00118761	TOP2A, ERCC6L, ZWILCH, TONSL, CGAS, MCM10, BRCA1, MKI67, XLR4A, MTBP, CHAF1B, CHAF1A, XLR4C, NUF2, XLR4B, NUSAP1, MYBL2, NEK2, KNTC1, SPDL1, POLE, EOMES, WDHD1, HELLS, RMI2, DDX11, RFX3, DNTT, KNL1, KIF22, HASPIN, KNSTRN, RUNX3, RUNX2, KIF4, RUNX1, MMS22L, NEIL3, BIRC5, PADI2, KIF2C, DNA2, SINHCAF, PIF1, BLM, CDCA2, UHRF1, PRIM1, CDCA5, CDCA8, NCAPG, GATA3, SLFN9, CENPA, NSL1, AURKB, RAD51AP1, CC…	743	1379	16713	1.40281	0.556388	0.0261244	0.0247495
GOTERM_BP_FAT	GO:0051270~regulation of cellular component movement	71	6.92683	0.00118828	RIPOR2, CD40, IL1RN, ITGA2B, LAMC2, PTPN22, TNF, ARHGAP4, EPB41L4B, CDH1, ITGAX, IL12A, MADCAM1, CCR7, CCR6, PLXNC1, NEFH, DSP, ITGA2, MST1, RHOH, PROX1, CCSAP, ADRA2A, GREM1, FGR, IL1A, TIAM1, CLDN4, CLDN3, IL1B, CLDN7, PADI2, DSG2, ADAM8, HAP1, SINHCAF, KIF20B, DSC2, CHST2, CHST3, CX3CR1, SEMA3D, LEF1, TACSTD2, NOD2, GATA3, FUT4, FUT7, RAB25, EPCAM, CXCR2, SLAMF8, STAP1, FGF23, WNT4, SLAMF1, CA…	838	1160	20051	1.46451	0.999606	0.0164561	0.0150432
GOTERM_BP_FAT	GO:0060236~regulation of mitotic spindle organization	8	0.780488	0.00120337	TPX2, RIPOR2, STIL, BORA, PLK1, TACC3, SASS6, CCSAP	838	40	20051	4.78544	0.999643	0.0166303	0.0152024
GOTERM_BP_FAT	GO:0034502~protein localization to chromosome	13	1.26829	0.00121197	ZWILCH, CDCA5, PLK1, KNL1, HASPIN, CENPA, AURKB, NDC80, MTBP, CDK1, KNTC1, SPDL1, CENPQ	838	103	20051	3.01994	0.999663	0.016714	0.0152789
GOTERM_CC_FAT	GO:0030057~desmosome	7	0.682927	0.0012222	DSP, POF1B, KAZN, DSG2, PKP3, DSC2, DSC3	743	28	16713	5.62349	0.566773	0.0261244	0.0247495
GOTERM_BP_FAT	GO:0072507~divalent inorganic cation homeostasis	41	4	0.0012452	CX3CR1, CD40, RAMP3, FPR1, CXCR5, P2RY10B, CACNA1E, GPR174, CACNA1I, TRPM2, NT5E, CD19, CXCR2, SPP1, CCR8, ENPP1, TNFSF11, CCR7, CCR6, FFAR1, FGF23, CCR4, SLC39A4, CCR3, TFAP2B, P2RY10, XCR1, FCRL5, VDR, GPR35, GPR55, CD4, XK, LCK, IL1B, ACKR4, F2RL1, HAP1, MS4A1, GPR18, ATP6V1B1	838	577	20051	1.7002	0.999729	0.0171364	0.015665
GOTERM_CC_FAT	GO:0005815~microtubule organizing center	58	5.65854	0.00126179	TOP2A, PATJ, CCNF, BRCA1, CDC14A, GPR174, CDC20, TBC1D30, PCLAF, RTTN, NEK2, SPDL1, DLGAP5, CEP55, CKAP2L, CEP295, DDX11, CKAP2, KCTD1, KIF23, IFT80, HASPIN, CCSAP, KNSTRN, IL17RB, ASPM, TIAM1, ESPL1, CCNE2, KIFC1, LCK, BIRC5, KIF2C, HAP1, KIF20B, TEDC1, RGS14, NLRC3, HMMR, PRKCZ, AURKB, CCNB2, CCNB1, CRACR2A, HAUS8, STIL, SPAG5, TRAT1, PLK1, TTC39A, NDC80, CENPF, RAD51, HOOK1, SASS6, TACC3, CDK1…	743	852	16713	1.53128	0.578362	0.0261534	0.0247769
GOTERM_BP_FAT	GO:0009615~response to virus	30	2.92683	0.00126289	CD40, FLT3, PRF1, CGAS, PTPN22, OAS1C, GATA3, TNF, SLFN9, TBX21, ITGAX, PMAIP1, IL12A, SKP2, IL12RB1, OASL1, IFI206, IFNLR1, IFIT1BL1, POU2F2, FOXP3, AICDA, UNC13D, DCLK1, TREML4, CD8A, OAS3, IL1B, F2RL1, TLR13	838	378	20051	1.89898	0.999759	0.0173437	0.0158545
GOTERM_MF_FAT	GO:0019900~kinase binding	56	5.46341	0.00127222	TOP2A, TRIM30B, TRIM30C, PTPN22, KIF11, FOXM1, CDH1, SIT1, ITGAX, BLNK, NEFH, DSP, DUSP2, BORA, MST1, RHOH, LAX1, ADRA2A, CCNA2, FGR, TIAM1, CCNE2, LCK, BANK1, CD8A, CD226, KIF20A, SKAP1, RGS14, NOD2, PRKCZ, AURKB, CCNB1, FAM83F, KLRK1, RACGAP1, STAP1, BCL2L14, NTRK1, GCH1, CDKN2A, CD160, BCL11A, PLK1, CDC6, GCSAM, TPX2, CENPE, ITGB2L, CD4, NR4A3, CD6, PRC1, CD28, LAT, CDK5R1	738	888	18102	1.54684	0.763024	0.0540426	0.0526091
GOTERM_BP_FAT	GO:0050792~regulation of viral process	26	2.53659	0.00128352	TOP2A, TRIM30B, TRIM30C, LEF1, TMPRSS2, CGAS, PTPN22, OAS1C, TNF, TSPAN32, FCNB, IL12RB1, OASL1, IFI206, IFNLR1, PROX1, IFIT1BL1, FOXP3, AICDA, CH25H, CD4, TREML4, OAS3, IL1B, TRIM59, PTX3	838	309	20051	2.01329	0.99979	0.0175904	0.01608
GOTERM_MF_FAT	GO:0008528~G-protein coupled peptide receptor activity	16	1.56098	0.00129014	CX3CR1, VIPR1, XCR1, RAMP3, GPR35, CXCR5, FPR1, GPR171, CXCR2, ACKR4, CCR8, F2RL1, CCR7, CCR6, CCR4, CCR3	738	151	18102	2.59904	0.767785	0.0540426	0.0526091
GOTERM_BP_FAT	GO:0032613~interleukin-10 production	10	0.97561	0.00129405	CD40LG, CD28, F2RL1, NOD2, PDCD1LG2, TIGIT, EPX, FOXP3, PRKCZ, IDO1	838	64	20051	3.73863	0.999804	0.0176247	0.0161114
GOTERM_BP_FAT	GO:0016447~somatic recombination of immunoglobulin gene segments	10	0.97561	0.00129405	CD40, CD40LG, ATAD5, TBX21, CD28, CCR6, FOXP3, AICDA, UNG, BATF	838	64	20051	3.73863	0.999804	0.0176247	0.0161114
GOTERM_BP_FAT	GO:0032653~regulation of interleukin-10 production	10	0.97561	0.00129405	CD40LG, CD28, F2RL1, NOD2, PDCD1LG2, TIGIT, EPX, FOXP3, PRKCZ, IDO1	838	64	20051	3.73863	0.999804	0.0176247	0.0161114
GOTERM_BP_FAT	GO:0034354~'de novo' NAD biosynthetic process from tryptophan	4	0.390244	0.00131855	KYNU, HAAO, AFMID, IDO1	838	6	20051	15.9515	0.999833	0.0178845	0.0163489
GOTERM_BP_FAT	GO:0071608~macrophage inflammatory protein-1 alpha production	4	0.390244	0.00131855	ARG2, NOD2, MEFV, MCOLN2	838	6	20051	15.9515	0.999833	0.0178845	0.0163489
GOTERM_BP_FAT	GO:1904029~regulation of cyclin-dependent protein kinase activity	11	1.07317	0.00132787	CCNA2, CCNB2, BLM, STIL, CCNB1, CCNE2, CDKN2A, CCNF, PLK1, PROX1, CDC6	838	77	20051	3.41817	0.999843	0.017974	0.0164307
GOTERM_BP_FAT	GO:0043903~regulation of symbiosis, encompassing mutualism through parasitism	27	2.63415	0.00133211	TOP2A, TRIM30B, TRIM30C, LEF1, TMPRSS2, CGAS, PTPN22, OAS1C, TNF, TSPAN32, FCNB, IL12RB1, OASL1, IFI206, IFNLR1, PROX1, IFIT1BL1, FOXP3, AICDA, CH25H, CD4, TREML4, OAS3, IL1B, F2RL1, TRIM59, PTX3	838	327	20051	1.97564	0.999848	0.0179943	0.0164493
GOTERM_BP_FAT	GO:0006796~phosphate-containing compound metabolic process	168	16.3902	0.00137249	IL1RN, PGAP1, CD80, CCNF, FZD10, SLA2, TNF, GIMAP7, CDC14A, GRAP2, TBC1D10C, ENPP1, TNFSF11, IL12A, NUDT17, NEK2, CD244A, MAP3K9, TNFRSF4, STK32C, UNC5CL, BORA, CISH, MATK, HASPIN, RUNX3, LAX1, TIAM1, MELK, CLDN3, CCNE2, NAIP6, CHIL1, ADAM8, TNIK, IDO1, CDKL1, BLK, RNASEH2B, BLM, CDCA2, TXK, TGFA, CDCA8, LPAR2, PRDM11, PRKCZ, SAMSN1, RASGRP1, MTMR7, CCNB2, CRACR2A, CCNB1, NUAK2, FIGNL1, CD19, AFM…	838	3224	20051	1.24683	0.999883	0.0185019	0.0169133
GOTERM_BP_FAT	GO:0032743~positive regulation of interleukin-2 production	8	0.780488	0.00139963	IL1A, CARMIL2, IL1B, CD28, BTNL2, CD3E, CARD11, RUNX1	838	41	20051	4.66872	0.999902	0.0188292	0.0172125
GOTERM_CC_FAT	GO:0044450~microtubule organizing center part	25	2.43902	0.00141358	TOP2A, TEDC1, PATJ, CCNF, NLRC3, GPR174, RTTN, DLGAP5, CEP55, STIL, SPAG5, TRAT1, CEP295, PLK1, KCTD1, CCSAP, KNSTRN, IL17RB, TIAM1, LCK, SASS6, TACC3, BIRC5, HYLS1, HAP1	743	277	16713	2.03014	0.619996	0.0284379	0.0269412
GOTERM_BP_FAT	GO:0030593~neutrophil chemotaxis	13	1.26829	0.00143413	GM10591, RIPOR2, CCL22, TREM3, CXCL15, ITGB2L, JAML, SELL, IL1B, CXCR2, SPP1, CCR7, CCL17	838	105	20051	2.96242	0.999922	0.0192541	0.0176009
GOTERM_BP_FAT	GO:0032656~regulation of interleukin-13 production	6	0.585366	0.0014582	ARG2, LEF1, IL1RAP, GATA3, PRKCZ, IL17RB	838	21	20051	6.83635	0.999934	0.0194584	0.0177876
GOTERM_BP_FAT	GO:0002839~positive regulation of immune response to tumor cell	6	0.585366	0.0014582	CD40LG, KLRK1, CD160, CD226, IL12A, ULBP1	838	21	20051	6.83635	0.999934	0.0194584	0.0177876
GOTERM_BP_FAT	GO:0002836~positive regulation of response to tumor cell	6	0.585366	0.0014582	CD40LG, KLRK1, CD160, CD226, IL12A, ULBP1	838	21	20051	6.83635	0.999934	0.0194584	0.0177876
GOTERM_BP_FAT	GO:0043299~leukocyte degranulation	13	1.26829	0.00155721	BLK, CD160, MRGPRB1, RASGRP1, UNC13D, FGR, RAB44, ITGB2L, NR4A3, F2RL1, KLRC1, IL13RA2, LAT	838	106	20051	2.93447	0.999966	0.0207308	0.0189508
GOTERM_BP_FAT	GO:0070233~negative regulation of T cell apoptotic process	7	0.682927	0.00156298	BLM, ARG2, BCL11B, CD27, IL7R, TNFRSF4, IDO1	838	31	20051	5.40292	0.999967	0.0207308	0.0189508
GOTERM_BP_FAT	GO:0048535~lymph node development	7	0.682927	0.00156298	FLT3, LTA, CXCR5, TNFSF11, CCR7, TOX, IL7R	838	31	20051	5.40292	0.999967	0.0207308	0.0189508
GOTERM_BP_FAT	GO:0042981~regulation of apoptotic process	98	9.56098	0.0015907	FOXA1, FCMR, IL1RN, TNF, IKZF3, CDH1, CLEC5A, TNFRSF8, IL12A, MAP3K9, SKP2, TNFRSF4, RUNX3, MELK, NAIP6, CLDN7, ADAM8, RNF122, CARD11, IDO1, BLK, BLM, TGFA, GATA3, PRDM11, PRKCZ, NUGGC, KLRK1, NUAK2, FIGNL1, PMAIP1, EVI2, ECT2, BCL2L14, WNT4, BARD1, TFAP2B, STIL, EGR3, BCL11B, VDR, CD160, PLK1, NR4A3, SELL, CDK1, CD27, IL7R, NFKBID, TOP2A, CD40, CD3G, BRCA1, SLC7A11, NAT8F4, RNF157, CTLA4, MYBL2,…	838	1730	20051	1.35541	0.999972	0.021056	0.0192481
GOTERM_BP_FAT	GO:0070231~T cell apoptotic process	10	0.97561	0.00161513	BLM, ARG2, BCL11B, CD27, ADAM8, PDCD1, IL7R, TNFRSF4, NFKBID, IDO1	838	66	20051	3.62533	0.999976	0.0212305	0.0194076
GOTERM_BP_FAT	GO:0050727~regulation of inflammatory response	32	3.12195	0.00161795	CX3CR1, PGLYRP2, NLRC3, NOD2, GATA3, MEFV, TNF, NT5E, FUT7, CNR2, PBK, SLAMF8, TNFSF11, CCR7, GGT1, CR2, ITGA2, IL1R2, FANCA, OSM, FOXP3, IL17RB, CD6, IL1B, TARM1, CD28, LTA, ADAM8, TLR6, HAMP, DNASE1L3, IDO1	838	420	20051	1.82303	0.999977	0.0212305	0.0194076
GOTERM_BP_FAT	GO:0002712~regulation of B cell mediated immunity	11	1.07317	0.00161848	CD40, CR2, ATAD5, TBX21, LTA, CD28, FCER2A, CD226, NOD2, FOXP3, TNF	838	79	20051	3.33164	0.999977	0.0212305	0.0194076
GOTERM_BP_FAT	GO:0002889~regulation of immunoglobulin mediated immune response	11	1.07317	0.00161848	CD40, CR2, ATAD5, TBX21, LTA, CD28, FCER2A, CD226, NOD2, FOXP3, TNF	838	79	20051	3.33164	0.999977	0.0212305	0.0194076
GOTERM_BP_FAT	GO:0032689~negative regulation of interferon-gamma production	8	0.780488	0.00161998	CD96, PGLYRP2, NOD2, PDCD1LG2, GATA3, FOXP3, SLAMF1, HAVCR2	838	42	20051	4.55756	0.999977	0.0212305	0.0194076
GOTERM_BP_FAT	GO:0016192~vesicle-mediated transport	97	9.46341	0.00167525	IGHV3-5, IGHV3-4, PGAP1, LY75, TNF, RAB43, FCNB, RAB44, TBC1D10C, AP1S3, IL13RA2, IGHV7-4, UNC13D, IGHV1-19, ARC, RAB39, BLK, IGHV1-66, HMMR, RASGRP1, CACNA1H, CACNA1I, RAB11FIP1, STAP1, IGHV8-5, TRDC, KLRC1, CD300LF, RAB11FIP4, AP1M2, SLAMF1, PACSIN1, PROM2, GM5150, CARMIL1, CD160, MARCO, ITGB2L, IGHV14-1, NR4A3, TREML4, HOOK1, HAMP, LAT, CD22, IGHV1-5, SIRPB1B, SIRPB1A, ACHE, IGHV5-2, IGHV1-43,…	838	1709	20051	1.35807	0.999984	0.0219015	0.020021
GOTERM_BP_FAT	GO:0032496~response to lipopolysaccharide	35	3.41463	0.00167783	CX3CR1, CD40, CEBPE, CD80, GFI1, PTPN22, NLRC3, NOD2, TNF, MPO, NUGGC, CXCL15, KLRK1, CNR2, STAP1, IL12A, CCR7, CTSG, GGT1, HAVCR1, HAVCR2, CD96, CR2, GCH1, IL36G, PDCD1LG2, SCIMP, FOXP3, AICDA, IL1A, IGKJ1, CD6, IL1B, LTA, IDO1	838	476	20051	1.75935	0.999984	0.0219015	0.020021
GOTERM_CC_FAT	GO:0070160~occluding junction	17	1.65854	0.00168034	PATJ, ILDR1, FRMD4A, PRKCZ, CLDN11, EPB41L4B, CLDN4, CLDN3, JAML, SAPCD2, MARVELD2, POF1B, EPCAM, CLDN8, CLDN7, ECT2, TJP3	743	157	16713	2.43565	0.683465	0.0328387	0.0311104
GOTERM_BP_FAT	GO:0002237~response to molecule of bacterial origin	36	3.5122	0.00168922	CX3CR1, CD40, CEBPE, CD80, GFI1, PTPN22, NLRC3, NOD2, TNF, MPO, NUGGC, CXCL15, KLRK1, CNR2, STAP1, IL12A, CCR7, CTSG, GGT1, HAVCR1, HAVCR2, CD96, CR2, GCH1, IL36G, PDCD1LG2, SCIMP, FOXP3, AICDA, IL1A, IGKJ1, CD6, IL1B, LTA, TLR6, IDO1	838	494	20051	1.74368	0.999986	0.0219329	0.0200498
GOTERM_BP_FAT	GO:0043370~regulation of CD4-positive, alpha-beta T cell differentiation	9	0.878049	0.00168998	TBX21, MYB, CCR7, GATA3, FOXP3, NFKBID, PRKCZ, RUNX3, RUNX1	838	54	20051	3.98787	0.999986	0.0219329	0.0200498
GOTERM_BP_FAT	GO:0002532~production of molecular mediator involved in inflammatory response	12	1.17073	0.00169022	CD96, RAB44, CD6, IL1R2, TARM1, SLAMF8, NLRC3, NOD2, TLR6, MEFV, TNF, IDO1	838	93	20051	3.08738	0.999986	0.0219329	0.0200498
GOTERM_BP_FAT	GO:0018108~peptidyl-tyrosine phosphorylation	26	2.53659	0.00174078	BLK, ITK, CD40, TXK, CD80, TGFA, NOD2, CD3E, PRKCZ, LRP8, SAMSN1, TNF, ERBB3, STAP1, IL12A, IL12RB1, NTRK1, OSM, ADRA2A, GREM1, FGR, ZAP70, CD4, BANK1, LCK, ABI3	838	316	20051	1.96869	0.99999	0.0225446	0.0206089
GOTERM_BP_FAT	GO:0051272~positive regulation of cellular component movement	44	4.29268	0.00175631	CX3CR1, RIPOR2, CD40, SEMA3D, LEF1, ITGA2B, LAMC2, GATA3, FUT4, EPB41L4B, FUT7, RAB25, EPCAM, CXCR2, ITGAX, IL12A, MADCAM1, CCR7, CCR6, SLAMF1, CARMIL1, CARMIL2, TNFSF14, ITGA2, ARHGEF39, SEMA4F, PROX1, PLET1, ADRA2A, FGR, TIAM1, IL1A, CLDN4, CLDN3, NR4A3, SELL, IL1B, CLDN7, F2RL1, ADAM8, INSM1, KIF20B, CHST2, CHST3	838	645	20051	1.63224	0.999991	0.0226742	0.0207273
GOTERM_BP_FAT	GO:2000147~positive regulation of cell motility	43	4.19512	0.00175766	CX3CR1, RIPOR2, CD40, SEMA3D, LEF1, ITGA2B, LAMC2, GATA3, FUT4, EPB41L4B, FUT7, RAB25, EPCAM, CXCR2, ITGAX, IL12A, MADCAM1, CCR7, CCR6, SLAMF1, CARMIL1, CARMIL2, TNFSF14, ITGA2, ARHGEF39, SEMA4F, PROX1, PLET1, ADRA2A, FGR, TIAM1, IL1A, CLDN4, CLDN3, NR4A3, SELL, IL1B, CLDN7, F2RL1, ADAM8, INSM1, KIF20B, CHST2	838	626	20051	1.64356	0.999991	0.0226742	0.0207273
GOTERM_BP_FAT	GO:0048585~negative regulation of response to stimulus	100	9.7561	0.0017845	RIPOR2, FCMR, IL1RN, PGLYRP2, EPX, SLA2, TNF, CDH1, RGS1, TBC1D10C, ENPP1, IL12A, UBASH3A, IL13RA2, TNFRSF4, CD96, RNF43, CISH, IL1R2, SHISA3, IFT80, LAX1, FOXP3, RUNX2, CLDN3, NAIP6, PADI2, RTN4R, RASAL1, GATA3, MEFV, RASAL3, PRKCZ, SAMSN1, FIGNL1, SLAMF8, STAP1, KLRC1, CD300LF, SLAMF1, WNT4, CD160, SH2D1A, PYCR1, BTNL2, PTPRE, NR4A3, KLRD1, IL7R, HAMP, NFKBID, GPR18, CD22, CGAS, PTPN22, BRCA1, …	838	1776	20051	1.34725	0.999992	0.0229754	0.0210027
GOTERM_CC_FAT	GO:0043296~apical junction complex	18	1.7561	0.00181712	PATJ, ILDR1, FRMD4A, PRKCZ, CLDN11, EPB41L4B, CLDN4, CLDN3, JAML, SAPCD2, MARVELD2, POF1B, CDH1, EPCAM, CLDN8, CLDN7, ECT2, TJP3	743	173	16713	2.34041	0.711782	0.0345252	0.0327081
GOTERM_BP_FAT	GO:0002922~positive regulation of humoral immune response	6	0.585366	0.0018229	IL1B, LTA, FCER2A, CCR7, NOD2, TNF	838	22	20051	6.5256	0.999994	0.0233785	0.0213711
GOTERM_BP_FAT	GO:0032616~interleukin-13 production	6	0.585366	0.0018229	ARG2, LEF1, IL1RAP, GATA3, PRKCZ, IL17RB	838	22	20051	6.5256	0.999994	0.0233785	0.0213711
GOTERM_BP_FAT	GO:0002825~regulation of T-helper 1 type immune response	7	0.682927	0.00185667	IL1B, TBX21, CCR7, IL12RB1, IL18R1, SLAMF1, HAVCR2	838	32	20051	5.23408	0.999995	0.0237654	0.0217248
KEGG_PATHWAY	mmu04062:Chemokine signaling pathway	18	1.7561	0.00185924	GM10591, CX3CR1, ITK, CCL22, XCR1, CXCR5, PRKCZ, CXCL15, FGR, TIAM1, CXCR2, CCR8, CCR7, CCR6, CCR4, CCL17, PLCB2, CCR3	363	192	8998	2.32386	0.398329	0.01828	0.0165454
KEGG_PATHWAY	mmu05144:Malaria	9	0.878049	0.00186803	CD40, ITGB2L, KLRB1C, CD40LG, KLRK1, IL1B, KLRB1F, IL12A, TNF	363	57	8998	3.91388	0.399774	0.01828	0.0165454
GOTERM_BP_FAT	GO:0023014~signal transduction by protein phosphorylation	53	5.17073	0.0019286	CD40, IL1RN, PTPN22, FZD10, FOXM1, TNF, PBK, TBC1D10C, TNFSF11, CCR7, MAP3K9, CCR3, HAVCR2, UNC5CL, DUSP2, FGG, TRAF1, LAX1, ADRA2A, IL1A, TIAM1, NAIP6, BANK1, IL1B, CHIL1, ADAM8, TLR6, TNIK, RAMP3, RGS14, TGFA, LPAR2, NOD2, PRKCZ, RASGRP1, CRACR2A, FGF23, CCL17, SLAMF1, TBX1, NTRK1, GM10591, CCL22, GPR55, OSM, L1CAM, SCIMP, MAPK13, MARCO, CD4, CD40LG, CD27, F2RL1	838	823	20051	1.54088	0.999997	0.0245906	0.0224792
GOTERM_BP_FAT	GO:0000165~MAPK cascade	53	5.17073	0.0019286	CD40, IL1RN, PTPN22, FZD10, FOXM1, TNF, PBK, TBC1D10C, TNFSF11, CCR7, MAP3K9, CCR3, HAVCR2, UNC5CL, DUSP2, FGG, TRAF1, LAX1, ADRA2A, IL1A, TIAM1, NAIP6, BANK1, IL1B, CHIL1, ADAM8, TLR6, TNIK, RAMP3, RGS14, TGFA, LPAR2, NOD2, PRKCZ, RASGRP1, CRACR2A, FGF23, CCL17, SLAMF1, TBX1, NTRK1, GM10591, CCL22, GPR55, OSM, L1CAM, SCIMP, MAPK13, MARCO, CD4, CD40LG, CD27, F2RL1	838	823	20051	1.54088	0.999997	0.0245906	0.0224792
GOTERM_BP_FAT	GO:0051057~positive regulation of small GTPase mediated signal transduction	11	1.07317	0.00195859	NTRK1, RTN4R, GPR174, P2RY10, GPR35, GPR55, LPAR2, F2RL1, P2RY10B, RASGRP1, GPR18	838	81	20051	3.24937	0.999998	0.0249248	0.0227847
GOTERM_MF_FAT	GO:0033691~sialic acid binding	5	0.487805	0.00196722	FCNB, L1CAM, SIGLECG, SIGLECF, CD22	738	14	18102	8.76016	0.892162	0.0781499	0.076077
GOTERM_BP_FAT	GO:0018212~peptidyl-tyrosine modification	26	2.53659	0.00199377	BLK, ITK, CD40, TXK, CD80, TGFA, NOD2, CD3E, PRKCZ, LRP8, SAMSN1, TNF, ERBB3, STAP1, IL12A, IL12RB1, NTRK1, OSM, ADRA2A, GREM1, FGR, ZAP70, CD4, BANK1, LCK, ABI3	838	319	20051	1.95018	0.999998	0.0253175	0.0231437
GOTERM_BP_FAT	GO:0010972~negative regulation of G2/M transition of mitotic cell cycle	10	0.97561	0.00199713	BARD1, MBD4, BLM, PLK1, CDK1, RBBP8, CLSPN, CDC6, BRCA1, AURKB	838	68	20051	3.51871	0.999998	0.0253175	0.0231437
GOTERM_MF_FAT	GO:0001653~peptide receptor activity	16	1.56098	0.0020267	CX3CR1, VIPR1, XCR1, RAMP3, GPR35, CXCR5, FPR1, GPR171, CXCR2, ACKR4, CCR8, F2RL1, CCR7, CCR6, CCR4, CCR3	738	158	18102	2.48389	0.89919	0.0781499	0.076077
GOTERM_MF_FAT	GO:0023024~MHC class I protein complex binding	4	0.390244	0.00208019	CD160, CD8A, KLRD1, KLRC1	738	7	18102	14.0163	0.90512	0.0781499	0.076077
GOTERM_CC_FAT	GO:0000793~condensed chromosome	22	2.14634	0.00208707	TOP2A, BLM, PLK1, NCAPG, BRCA1, MKI67, CENPA, NSL1, AURKB, NDC80, XLR4A, CENPE, CENPF, DSN1, CCNB1, RAD51, XLR4C, XLR4B, NEK2, SPDL1, CENPQ, BUB1	743	237	16713	2.08805	0.760463	0.0385826	0.0365519
GOTERM_BP_FAT	GO:0042119~neutrophil activation	8	0.780488	0.00214091	ITGB2L, IL18RAP, CXCR2, F2RL1, CTSG, PRG3, TNF, DNASE1L3	838	44	20051	4.3504	0.999999	0.026979	0.0246626
GOTERM_MF_FAT	GO:0038024~cargo receptor activity	11	1.07317	0.00214204	ENDOU, MARCO, CD6, CD5, ACKR4, ILDR1, STAB2, TMPRSS2, ENPP1, HMMR, LRP8	738	84	18102	3.21206	0.911544	0.0781499	0.076077
GOTERM_BP_FAT	GO:0002714~positive regulation of B cell mediated immunity	9	0.878049	0.00214457	CD40, ATAD5, TBX21, LTA, CD28, FCER2A, CD226, NOD2, TNF	838	56	20051	3.84544	0.999999	0.026979	0.0246626
GOTERM_BP_FAT	GO:0044818~mitotic G2/M transition checkpoint	9	0.878049	0.00214457	BARD1, MBD4, BLM, PLK1, CDK1, RBBP8, CLSPN, CDC6, BRCA1	838	56	20051	3.84544	0.999999	0.026979	0.0246626
GOTERM_BP_FAT	GO:0002891~positive regulation of immunoglobulin mediated immune response	9	0.878049	0.00214457	CD40, ATAD5, TBX21, LTA, CD28, FCER2A, CD226, NOD2, TNF	838	56	20051	3.84544	0.999999	0.026979	0.0246626
GOTERM_BP_FAT	GO:0002704~negative regulation of leukocyte mediated immunity	11	1.07317	0.00214904	CD96, CR2, TBX21, KLRD1, KLRC1, NOD2, IL13RA2, IL7R, FOXP3, SLAMF1, HAVCR2	838	82	20051	3.20975	0.999999	0.0269837	0.0246669
GOTERM_BP_FAT	GO:0034116~positive regulation of heterotypic cell-cell adhesion	5	0.487805	0.00215743	LCK, IL1B, FGG, TNF, SKAP1	838	14	20051	8.54543	0.999999	0.0270376	0.0247161
GOTERM_BP_FAT	GO:0002834~regulation of response to tumor cell	7	0.682927	0.00219029	CD40LG, KLRK1, CD160, CD226, IL12A, ULBP1, HAVCR2	838	33	20051	5.07547	0.999999	0.0273974	0.025045
GOTERM_BP_FAT	GO:1903490~positive regulation of mitotic cytokinesis	4	0.390244	0.00223592	CDCA8, BIRC5, KIF20B, AURKB	838	7	20051	13.6727	1	0.0277053	0.0253265
GOTERM_BP_FAT	GO:0060558~regulation of calcidiol 1-monooxygenase activity	4	0.390244	0.00223592	VDR, IL1B, GFI1, TNF	838	7	20051	13.6727	1	0.0277053	0.0253265
GOTERM_BP_FAT	GO:0034627~'de novo' NAD biosynthetic process	4	0.390244	0.00223592	KYNU, HAAO, AFMID, IDO1	838	7	20051	13.6727	1	0.0277053	0.0253265
GOTERM_BP_FAT	GO:0033091~positive regulation of immature T cell proliferation	4	0.390244	0.00223592	IL1A, BLM, IL1B, FOXP3	838	7	20051	13.6727	1	0.0277053	0.0253265
GOTERM_BP_FAT	GO:0033092~positive regulation of immature T cell proliferation in thymus	4	0.390244	0.00223592	IL1A, BLM, IL1B, FOXP3	838	7	20051	13.6727	1	0.0277053	0.0253265
GOTERM_MF_FAT	GO:0005164~tumor necrosis factor receptor binding	7	0.682927	0.00226211	CD40LG, TNFSF14, LTA, TNFSF11, TNFSF8, TRAF1, TNF	738	34	18102	5.04998	0.922799	0.0799515	0.0778308
GOTERM_BP_FAT	GO:2000145~regulation of cell motility	65	6.34146	0.00227685	RIPOR2, CD40, IL1RN, ITGA2B, LAMC2, PTPN22, TNF, ARHGAP4, EPB41L4B, CDH1, ITGAX, IL12A, MADCAM1, CCR7, CCR6, PLXNC1, ITGA2, MST1, RHOH, PROX1, CCSAP, ADRA2A, GREM1, FGR, IL1A, TIAM1, CLDN4, CLDN3, IL1B, CLDN7, PADI2, ADAM8, SINHCAF, KIF20B, CHST2, CX3CR1, SEMA3D, LEF1, TACSTD2, NOD2, GATA3, FUT4, FUT7, RAB25, EPCAM, CXCR2, SLAMF8, STAP1, FGF23, WNT4, SLAMF1, CARMIL1, CARMIL2, TNFSF14, ARHGEF39, S…	838	1068	20051	1.45624	1	0.0281594	0.0257416
GOTERM_BP_FAT	GO:0030334~regulation of cell migration	62	6.04878	0.002305	RIPOR2, CD40, IL1RN, ITGA2B, LAMC2, PTPN22, TNF, ARHGAP4, EPB41L4B, CDH1, ITGAX, IL12A, MADCAM1, CCR7, CCR6, PLXNC1, ITGA2, MST1, RHOH, PROX1, ADRA2A, GREM1, FGR, IL1A, TIAM1, CLDN4, CLDN3, IL1B, PADI2, ADAM8, SINHCAF, KIF20B, CHST2, CX3CR1, SEMA3D, LEF1, TACSTD2, NOD2, GATA3, FUT4, FUT7, RAB25, CXCR2, SLAMF8, STAP1, FGF23, WNT4, SLAMF1, CARMIL1, CARMIL2, TNFSF14, ARHGEF39, SEMA4F, GCSAM, PLET1, …	838	1007	20051	1.47317	1	0.0284058	0.0259669
GOTERM_BP_FAT	GO:0051321~meiotic cell cycle	29	2.82927	0.00230539	TOP2A, MKI67, CDC20, RAD51AP1, XLR4A, CCNB2, FIGNL1, XLR4C, XLR4B, NUF2, RBBP8, NEK2, MYBL1, BUB1, WNT4, PLK1, FANCA, OSM, HASPIN, NDC80, CENPE, ASPM, RAD51, ESPL1, CCNE2, BIRC5, MNS1, TRIP13, CENPS	838	376	20051	1.84545	1	0.0284058	0.0259669
GOTERM_MF_FAT	GO:0019901~protein kinase binding	50	4.87805	0.00237256	TOP2A, TRIM30B, TRIM30C, PTPN22, KIF11, FOXM1, CDH1, ITGAX, BLNK, NEFH, DSP, DUSP2, BORA, MST1, RHOH, LAX1, ADRA2A, CCNA2, FGR, TIAM1, CCNE2, LCK, BANK1, CD8A, CD226, KIF20A, SKAP1, RGS14, NOD2, PRKCZ, CCNB1, FAM83F, RACGAP1, STAP1, BCL2L14, GCH1, CDKN2A, BCL11A, PLK1, GCSAM, TPX2, CENPE, ITGB2L, CD4, NR4A3, CD6, PRC1, CD28, LAT, CDK5R1	738	793	18102	1.54656	0.931885	0.0813143	0.0791574
GOTERM_BP_FAT	GO:0048247~lymphocyte chemotaxis	9	0.878049	0.00240523	GM10591, CH25H, CCL22, TNFSF14, 2610528A11RIK, PADI2, CCR7, ADAM8, CCL17	838	57	20051	3.77798	1	0.0295808	0.0270409
GOTERM_BP_FAT	GO:0032735~positive regulation of interleukin-12 production	8	0.780488	0.00244557	CD40, CD40LG, FLT3, CCR7, NOD2, TLR6, SCIMP, IDO1	838	45	20051	4.25373	1	0.0298159	0.0272559
GOTERM_BP_FAT	GO:0001562~response to protozoan	8	0.780488	0.00244557	CD40, GBP8, TLR12, ENPP1, IL12A, TRBV13-3, TSPAN32, BATF	838	45	20051	4.25373	1	0.0298159	0.0272559
GOTERM_BP_FAT	GO:0032720~negative regulation of tumor necrosis factor production	10	0.97561	0.00244796	ARG2, FLT3, PTPN22, NLRC3, NOD2, TLR6, FOXP3, GPR18, SLAMF1, HAVCR2	838	70	20051	3.41817	1	0.0298159	0.0272559
GOTERM_BP_FAT	GO:0002707~negative regulation of lymphocyte mediated immunity	10	0.97561	0.00244796	CD96, CR2, TBX21, KLRD1, KLRC1, NOD2, IL7R, FOXP3, SLAMF1, HAVCR2	838	70	20051	3.41817	1	0.0298159	0.0272559
GOTERM_BP_FAT	GO:1902750~negative regulation of cell cycle G2/M phase transition	10	0.97561	0.00244796	BARD1, MBD4, BLM, PLK1, CDK1, RBBP8, CLSPN, CDC6, BRCA1, AURKB	838	70	20051	3.41817	1	0.0298159	0.0272559
GOTERM_BP_FAT	GO:0030335~positive regulation of cell migration	41	4	0.00245149	CX3CR1, RIPOR2, CD40, SEMA3D, LEF1, ITGA2B, LAMC2, GATA3, FUT4, EPB41L4B, FUT7, RAB25, CXCR2, ITGAX, IL12A, MADCAM1, CCR7, CCR6, SLAMF1, CARMIL1, CARMIL2, TNFSF14, ITGA2, ARHGEF39, SEMA4F, PROX1, PLET1, ADRA2A, FGR, TIAM1, IL1A, CLDN4, CLDN3, NR4A3, SELL, IL1B, F2RL1, ADAM8, INSM1, KIF20B, CHST2	838	599	20051	1.63776	1	0.0298159	0.0272559
GOTERM_BP_FAT	GO:0043067~regulation of programmed cell death	98	9.56098	0.00250035	FOXA1, FCMR, IL1RN, TNF, IKZF3, CDH1, CLEC5A, TNFRSF8, IL12A, MAP3K9, SKP2, TNFRSF4, RUNX3, MELK, NAIP6, CLDN7, ADAM8, RNF122, CARD11, IDO1, BLK, BLM, TGFA, GATA3, PRDM11, PRKCZ, NUGGC, KLRK1, NUAK2, FIGNL1, PMAIP1, EVI2, ECT2, BCL2L14, WNT4, BARD1, TFAP2B, STIL, EGR3, BCL11B, VDR, CD160, PLK1, NR4A3, SELL, CDK1, CD27, IL7R, NFKBID, TOP2A, CD40, CD3G, BRCA1, SLC7A11, NAT8F4, RNF157, CTLA4, MYBL2,…	838	1754	20051	1.33687	1	0.0303542	0.0277479
GOTERM_BP_FAT	GO:0016032~viral process	46	4.4878	0.00251979	TOP2A, TRIM30B, CD40, TRIM30C, FLT3, LEF1, PRF1, TMPRSS2, CGAS, PTPN22, OAS1C, GATA3, TNF, SLFN9, TSPAN32, RAB43, FCNB, TBX21, ITGAX, PMAIP1, IL12A, SKP2, IL12RB1, OASL1, IFI206, GPR15, IFNLR1, PROX1, IFIT1BL1, POU2F2, FOXP3, AICDA, UNC13D, DCLK1, CH25H, CD4, SPINT1, TREML4, CD8A, OAS3, IL1B, F2RL1, TRIM59, PTX3, NECTIN4, TLR13	838	696	20051	1.5814	1	0.0305339	0.0279122
GOTERM_CC_FAT	GO:0005876~spindle microtubule	11	1.07317	0.00252924	CENPE, KIF18B, HAUS8, CEP295, PLK1, CDK1, BIRC5, KNTC1, KIF11, CCSAP, AURKB	743	79	16713	3.13207	0.823104	0.0455264	0.0431302
GOTERM_BP_FAT	GO:0043900~regulation of multi-organism process	35	3.41463	0.00258425	TOP2A, TRIM30B, TRIM30C, LEF1, PRF1, TMPRSS2, CGAS, PTPN22, OAS1C, NOD2, TNF, TSPAN32, CACNA1H, FCNB, IL12RB1, OASL1, HAVCR2, ARG2, IFI206, FANCA, IFNLR1, PROX1, IFIT1BL1, SCIMP, FOXP3, AICDA, CH25H, CD4, TREML4, OAS3, IL1B, F2RL1, TRIM59, PTX3, FCER2A	838	488	20051	1.71609	1	0.0312575	0.0285737
GOTERM_BP_FAT	GO:0040017~positive regulation of locomotion	44	4.29268	0.00259096	CX3CR1, RIPOR2, CD40, SEMA3D, LEF1, ITGA2B, LAMC2, GATA3, FUT4, EPB41L4B, FUT7, RAB25, EPCAM, CXCR2, ITGAX, IL12A, MADCAM1, CCR7, CCR6, CCR4, SLAMF1, CARMIL1, CARMIL2, TNFSF14, ITGA2, ARHGEF39, SEMA4F, PROX1, PLET1, ADRA2A, FGR, TIAM1, IL1A, CLDN4, CLDN3, NR4A3, SELL, IL1B, CLDN7, F2RL1, ADAM8, INSM1, KIF20B, CHST2	838	658	20051	1.6	1	0.0312813	0.0285955
GOTERM_BP_FAT	GO:0044764~multi-organism cellular process	47	4.58537	0.00264094	TOP2A, CX3CR1, TRIM30B, CD40, TRIM30C, FLT3, LEF1, PRF1, TMPRSS2, CGAS, PTPN22, OAS1C, GATA3, TNF, SLFN9, TSPAN32, RAB43, FCNB, TBX21, ITGAX, PMAIP1, IL12A, SKP2, IL12RB1, OASL1, IFI206, GPR15, IFNLR1, PROX1, IFIT1BL1, POU2F2, FOXP3, AICDA, UNC13D, DCLK1, CH25H, CD4, SPINT1, TREML4, CD8A, OAS3, IL1B, F2RL1, TRIM59, PTX3, NECTIN4, TLR13	838	717	20051	1.56845	1	0.0318265	0.0290938
GOTERM_BP_FAT	GO:0008219~cell death	125	12.1951	0.00268636	FOXA1, FCMR, IL1RN, PRF1, TNF, IKZF3, CDH1, CLEC5A, ENPP1, TNFRSF8, IL12A, MAP3K9, SKP2, TNFRSF4, RUNX3, TIAM1, MELK, NAIP6, CLDN7, CHIL1, ADAM8, RNF122, CARD11, IDO1, BLK, BLM, CDCA7, TGFA, GATA3, MEFV, PRDM11, PRKCZ, NUGGC, TRPM2, KLRK1, NUAK2, FIGNL1, PMAIP1, EVI2, ECT2, CLCA3A2, BCL2L14, WNT4, BARD1, TFAP2B, STIL, EGR3, BCL11B, VDR, CD160, TNFRSF9, PLK1, EAF2, PYCR1, TPX2, NR4A3, SELL, CD28, …	838	2333	20051	1.282	1	0.0323148	0.0295402
GOTERM_MF_FAT	GO:0005044~scavenger receptor activity	8	0.780488	0.00274023	ENDOU, MARCO, CD6, CD5, ACKR4, STAB2, TMPRSS2, ENPP1	738	47	18102	4.17506	0.955106	0.091153	0.0887352
GOTERM_BP_FAT	GO:0044419~interspecies interaction between organisms	51	4.97561	0.00276982	TOP2A, CD40, TRIM30B, PGLYRP2, TRIM30C, FLT3, PRF1, CGAS, PTPN22, TREM3, TNF, RAB43, FCNB, ITGAX, IL12A, CTSG, SKP2, OASL1, PROX1, IFIT1BL1, FOXP3, UNC13D, CH25H, SPINT1, CD8A, IL1B, OAS3, TRIM59, FCER2A, CLEC4E, TLR13, LEF1, TMPRSS2, OAS1C, GATA3, SLFN9, TSPAN32, TBX21, PMAIP1, IL12RB1, IFI206, GPR15, IFNLR1, POU2F2, AICDA, DCLK1, CD4, TREML4, F2RL1, PTX3, NECTIN4	838	797	20051	1.5311	1	0.033258	0.0304024
GOTERM_BP_FAT	GO:0045005~DNA-dependent DNA replication maintenance of fidelity	8	0.780488	0.00278251	MMS22L, BLM, RAD51, DDX11, TONSL, DNA2, POLE, CENPS	838	46	20051	4.16125	1	0.0333497	0.0304862
GOTERM_BP_FAT	GO:0002638~negative regulation of immunoglobulin production	5	0.487805	0.00284556	VPREB3, IL13RA2, FOXP3, SIGLECG, CD22	838	15	20051	7.97574	1	0.0339203	0.0310079
GOTERM_BP_FAT	GO:0002517~T cell tolerance induction	5	0.487805	0.00284556	CD3E, ICOS, FOXP3, RUNX1, IDO1	838	15	20051	7.97574	1	0.0339203	0.0310079
GOTERM_BP_FAT	GO:0043383~negative T cell selection	5	0.487805	0.00284556	ZAP70, THEMIS, CD28, CCR7, CD3E	838	15	20051	7.97574	1	0.0339203	0.0310079
GOTERM_BP_FAT	GO:0050848~regulation of calcium-mediated signaling	13	1.26829	0.00288943	TRAT1, SLA2, CD3E, L1CAM, TNF, SIGLECG, ZAP70, CD4, ERBB3, CD8A, TBC1D10C, HAP1, CD22	838	114	20051	2.72854	1	0.0343811	0.031429
GOTERM_BP_FAT	GO:0055080~cation homeostasis	52	5.07317	0.00292632	CD40, GPR174, ENPP1, TNFSF11, CCR8, CCR7, CCR6, FFAR1, CCR4, SLC39A4, CCR3, TASL, FCRL5, GPR35, TESC, UPK3A, IL1A, LCK, SLC9A7, IL1B, HAP1, RAB39, GM6377, MS4A1, ATP6V1B1, CX3CR1, RAMP3, FPR1, CXCR5, P2RY10B, CACNA1E, CACNA1I, TRPM2, NT5E, CD19, CXCR2, SPP1, SLAMF8, FGF23, TFAP2B, P2RY10, XCR1, VDR, GPR55, KCNJ16, SLC4A8, CD4, XK, ACKR4, F2RL1, HAMP, GPR18	838	819	20051	1.51919	1	0.0347573	0.031773
GOTERM_BP_FAT	GO:1903556~negative regulation of tumor necrosis factor superfamily cytokine production	10	0.97561	0.00297597	ARG2, FLT3, PTPN22, NLRC3, NOD2, TLR6, FOXP3, GPR18, SLAMF1, HAVCR2	838	72	20051	3.32322	1	0.0352834	0.0322539
GOTERM_BP_FAT	GO:2000108~positive regulation of leukocyte apoptotic process	7	0.682927	0.00299068	BLK, NR4A3, CDKN2A, ADAM8, PDCD1, NFKBID, IDO1	838	35	20051	4.78544	1	0.0353842	0.032346
GOTERM_BP_FAT	GO:0002823~negative regulation of adaptive immune response based on somatic recombination of immune receptors built from immunoglobulin superfamily domains	9	0.878049	0.00300057	CR2, TBX21, KLRD1, KLRC1, NOD2, IL7R, FOXP3, SLAMF1, HAVCR2	838	59	20051	3.64991	1	0.0353842	0.032346
GOTERM_BP_FAT	GO:0050850~positive regulation of calcium-mediated signaling	9	0.878049	0.00300057	ZAP70, CD4, ERBB3, CD8A, TRAT1, HAP1, CD3E, L1CAM, TNF	838	59	20051	3.64991	1	0.0353842	0.032346
GOTERM_BP_FAT	GO:1901992~positive regulation of mitotic cell cycle phase transition	12	1.17073	0.00302004	CENPE, MTBP, STIL, CCNB1, RRM2, DBF4, UBE2C, CDCA5, CDK1, SASS6, BIRC5, CDC7	838	100	20051	2.87126	1	0.0355502	0.0324978
GOTERM_BP_FAT	GO:0034109~homotypic cell-cell adhesion	11	1.07317	0.00306509	DSP, BLK, FGG, ITGA2B, TNFSF11, DSG2, CTSG, SLC7A11, L1CAM, DSC2, TSPAN32	838	86	20051	3.06046	1	0.0360162	0.0329238
GOTERM_BP_FAT	GO:0006793~phosphorus metabolic process	169	16.4878	0.00310318	IL1RN, PGAP1, CD80, CCNF, FZD10, SLA2, TNF, GIMAP7, CDC14A, GRAP2, TBC1D10C, ENPP1, TNFSF11, IL12A, NUDT17, NEK2, CD244A, MAP3K9, TNFRSF4, STK32C, UNC5CL, BORA, CISH, MATK, HASPIN, RUNX3, LAX1, TIAM1, MELK, CLDN3, CCNE2, NAIP6, CHIL1, ADAM8, TNIK, IDO1, CDKL1, BLK, RNASEH2B, BLM, CDCA2, TXK, TGFA, CDCA8, LPAR2, PRDM11, PRKCZ, SAMSN1, RASGRP1, MTMR7, CCNB2, CRACR2A, CCNB1, NUAK2, FIGNL1, CD19, AFM…	838	3309	20051	1.22203	1	0.0363989	0.0332736
GOTERM_BP_FAT	GO:0097028~dendritic cell differentiation	8	0.780488	0.00315392	BLK, TRPM2, CD40LG, FLT3, CAMK4, F2RL1, CCR7, BATF	838	47	20051	4.07272	1	0.0369283	0.0337576
GOTERM_MF_FAT	GO:0042287~MHC protein binding	9	0.878049	0.00317717	CD4, KLRK1, H2-M2, KLRA17, CD8B1, KLRD1, H2-Q2, CD244A, PILRA	738	61	18102	3.61895	0.972652	0.102668	0.0999448
GOTERM_CC_FAT	GO:0030496~midbody	21	2.04878	0.00326632	SPAG5, DDX11, PLK1, CDCA8, KIF23, AURKB, KIF4, CENPE, ASPM, CENPF, RACGAP1, RASGEF1B, PRC1, CDK1, BIRC5, NEK2, KIF20A, KIF20B, ECT2, RAB11FIP4, CEP55	743	230	16713	2.05379	0.893309	0.0572863	0.0542712
GOTERM_BP_FAT	GO:0048872~homeostasis of number of cells	28	2.73171	0.00327336	CX3CR1, FLT3, TNFRSF13C, GATA3, GPR174, CCNB2, SIT1, MYB, CXCR2, MAP7, STAT4, ENPP1, TNFRSF17, PMAIP1, CCR7, BCL2A1A, TNFRSF4, CCR4, CARMIL2, P2RY14, FOXP3, CD7, IL7R, HAMP, LAT, CARD11, GAPT, CHST3	838	367	20051	1.82551	1	0.0382588	0.0349739
GOTERM_BP_FAT	GO:0002827~positive regulation of T-helper 1 type immune response	6	0.585366	0.00331591	IL1B, TBX21, CCR7, IL12RB1, IL18R1, SLAMF1	838	25	20051	5.74253	1	0.0384833	0.0351791
GOTERM_BP_FAT	GO:0002544~chronic inflammatory response	6	0.585366	0.00331591	CX3CR1, LTA, FOXP3, TNF, UNC13D, IDO1	838	25	20051	5.74253	1	0.0384833	0.0351791
GOTERM_BP_FAT	GO:0034114~regulation of heterotypic cell-cell adhesion	6	0.585366	0.00331591	IL1RN, LCK, IL1B, FGG, TNF, SKAP1	838	25	20051	5.74253	1	0.0384833	0.0351791
GOTERM_BP_FAT	GO:0035739~CD4-positive, alpha-beta T cell proliferation	6	0.585366	0.00331591	ARG2, TARM1, CD28, CD3E, FOXP3, CARD11	838	25	20051	5.74253	1	0.0384833	0.0351791
GOTERM_BP_FAT	GO:1902106~negative regulation of leukocyte differentiation	13	1.26829	0.00333713	PGLYRP2, CDKN2A, GPR68, FLT3, GPR55, DTX1, RUNX3, FOXP3, RUNX1, TBX21, CTLA4, CLEC2I, NFKBID	838	116	20051	2.6815	1	0.0386614	0.0353419
GOTERM_BP_FAT	GO:0050901~leukocyte tethering or rolling	7	0.682927	0.00346426	CX3CR1, FUT7, SELL, MADCAM1, TNF, CHST2, FUT4	838	36	20051	4.65251	1	0.0397447	0.0363322
GOTERM_BP_FAT	GO:0002719~negative regulation of cytokine production involved in immune response	7	0.682927	0.00346426	CD96, TBX21, NOD2, EPX, FOXP3, TNF, SLAMF1	838	36	20051	4.65251	1	0.0397447	0.0363322
GOTERM_BP_FAT	GO:2000556~positive regulation of T-helper 1 cell cytokine production	4	0.390244	0.00346681	IL1B, TBX21, IL18R1, SLAMF1	838	8	20051	11.9636	1	0.0397447	0.0363322
GOTERM_BP_FAT	GO:0030885~regulation of myeloid dendritic cell activation	4	0.390244	0.00346681	CENPF, KLRK1, TSPAN32, HAVCR2	838	8	20051	11.9636	1	0.0397447	0.0363322
GOTERM_BP_FAT	GO:2000554~regulation of T-helper 1 cell cytokine production	4	0.390244	0.00346681	IL1B, TBX21, IL18R1, SLAMF1	838	8	20051	11.9636	1	0.0397447	0.0363322
GOTERM_BP_FAT	GO:0002857~positive regulation of natural killer cell mediated immune response to tumor cell	4	0.390244	0.00346681	KLRK1, CD160, CD226, IL12A	838	8	20051	11.9636	1	0.0397447	0.0363322
GOTERM_CC_FAT	GO:1990023~mitotic spindle midzone	5	0.487805	0.00355336	CENPE, KIF18B, PRC1, KIF20B, AURKB	743	15	16713	7.49798	0.912387	0.0607624	0.0575644
GOTERM_BP_FAT	GO:1901989~positive regulation of cell cycle phase transition	13	1.26829	0.0035811	STIL, RRM2, ATAD5, UBE2C, CDCA5, CDC7, MTBP, CENPE, CCNB1, DBF4, SASS6, CDK1, BIRC5	838	117	20051	2.65858	1	0.0409837	0.0374648
GOTERM_BP_FAT	GO:1903555~regulation of tumor necrosis factor superfamily cytokine production	18	1.7561	0.00360046	CX3CR1, ARG2, FLT3, PTPN22, NLRC3, NOD2, OAS1C, FOXP3, RASGRP1, IL1A, OAS3, TNFRSF8, CCR7, ADAM8, TLR6, GPR18, SLAMF1, HAVCR2	838	196	20051	2.1974	1	0.0411339	0.037602
GOTERM_BP_FAT	GO:0006968~cellular defense response	5	0.487805	0.00366997	SH2D1A, CXCR2, TNFRSF4, CCL17, LAT	838	16	20051	7.47725	1	0.0415677	0.0379987
GOTERM_BP_FAT	GO:0051782~negative regulation of cell division	5	0.487805	0.00366997	ASPM, BLM, 2610528A11RIK, AURKB, E2F8	838	16	20051	7.47725	1	0.0415677	0.0379987
GOTERM_BP_FAT	GO:0009435~NAD biosynthetic process	5	0.487805	0.00366997	KYNU, HAAO, AFMID, QPRT, IDO1	838	16	20051	7.47725	1	0.0415677	0.0379987
GOTERM_BP_FAT	GO:0001787~natural killer cell proliferation	5	0.487805	0.00366997	CD244A, SLAMF6, IL12A, IL12RB1, SLAMF1	838	16	20051	7.47725	1	0.0415677	0.0379987
GOTERM_BP_FAT	GO:0001771~immunological synapse formation	5	0.487805	0.00366997	CD6, PRF1, CCR7, CLEC2I, HAVCR2	838	16	20051	7.47725	1	0.0415677	0.0379987
GOTERM_BP_FAT	GO:0006873~cellular ion homeostasis	47	4.58537	0.00378378	CX3CR1, CD40, RAMP3, FPR1, CXCR5, P2RY10B, CACNA1E, GPR174, CACNA1I, TRPM2, CD19, CXCR2, SPP1, SLAMF8, CCR8, ENPP1, CCR7, CCR6, FFAR1, FGF23, CCR4, SLC39A4, CCR3, TASL, P2RY10, XCR1, FCRL5, VDR, GPR35, TESC, GPR55, SLC4A8, IL1A, CD4, XK, LCK, SLC9A7, IL1B, ACKR4, F2RL1, HAP1, RAB39, MS4A1, GM6377, HAMP, GPR18, ATP6V1B1	838	731	20051	1.53841	1	0.0427833	0.0391098
GOTERM_BP_FAT	GO:0032886~regulation of microtubule-based process	22	2.14634	0.00384609	RIPOR2, STIL, PATJ, BORA, SPAG5, CEP295, CCNF, PLK1, CKAP2, KIF11, SLAIN1, CCSAP, TPX2, CENPF, KIFC1, SASS6, TACC3, TRIM36, NEK2, HAP1, NEFH, CDK5R1	838	265	20051	1.98641	1	0.0434134	0.0396859
GOTERM_BP_FAT	GO:0098771~inorganic ion homeostasis	52	5.07317	0.00387952	CD40, GPR174, ENPP1, TNFSF11, CCR8, CCR7, CCR6, FFAR1, CCR4, SLC39A4, CCR3, TASL, FCRL5, GPR35, TESC, UPK3A, IL1A, LCK, SLC9A7, IL1B, HAP1, RAB39, GM6377, MS4A1, ATP6V1B1, CX3CR1, RAMP3, FPR1, CXCR5, P2RY10B, CACNA1E, CACNA1I, TRPM2, NT5E, CD19, CXCR2, SPP1, SLAMF8, FGF23, TFAP2B, P2RY10, XCR1, VDR, GPR55, KCNJ16, SLC4A8, CD4, XK, ACKR4, F2RL1, HAMP, GPR18	838	831	20051	1.49725	1	0.0437158	0.0399623
GOTERM_BP_FAT	GO:0070830~bicellular tight junction assembly	10	0.97561	0.00393206	CLDN11, CLDN4, CLDN3, MARVELD2, POF1B, CDH1, CLDN8, CLDN7, ECT2, TNF	838	75	20051	3.19029	1	0.0442178	0.0404212
GOTERM_BP_FAT	GO:0043506~regulation of JUN kinase activity	11	1.07317	0.00393748	TIAM1, IL1RN, CD40LG, IL1B, CCR7, PTPN22, MAP3K9, TNIK, FZD10, TLR6, TNF	838	89	20051	2.9573	1	0.0442178	0.0404212
GOTERM_BP_FAT	GO:2000561~regulation of CD4-positive, alpha-beta T cell proliferation	6	0.585366	0.00396642	ARG2, TARM1, CD28, CD3E, FOXP3, CARD11	838	26	20051	5.52166	1	0.0442413	0.0404427
GOTERM_BP_FAT	GO:0002726~positive regulation of T cell cytokine production	6	0.585366	0.00396642	IL1B, TBX21, GATA3, PRKCZ, IL18R1, SLAMF1	838	26	20051	5.52166	1	0.0442413	0.0404427
GOTERM_BP_FAT	GO:0036336~dendritic cell migration	6	0.585366	0.00396642	TRPM2, SLAMF8, CCR7, IL12A, CCR6, SLAMF1	838	26	20051	5.52166	1	0.0442413	0.0404427
GOTERM_BP_FAT	GO:0034138~toll-like receptor 3 signaling pathway	6	0.585366	0.00396642	F2RL1, PTPN22, OAS1C, SCIMP, TNF, HAVCR2	838	26	20051	5.52166	1	0.0442413	0.0404427
GOTERM_BP_FAT	GO:0051480~regulation of cytosolic calcium ion concentration	30	2.92683	0.00400629	CX3CR1, RAMP3, FPR1, CXCR5, P2RY10B, CACNA1E, GPR174, CACNA1I, TRPM2, CD19, CXCR2, CCR8, CCR7, CCR6, FFAR1, CCR4, CCR3, P2RY10, XCR1, FCRL5, GPR35, GPR55, CD4, LCK, IL1B, ACKR4, F2RL1, HAP1, MS4A1, GPR18	838	409	20051	1.75505	1	0.0446106	0.0407803
GOTERM_BP_FAT	GO:0002444~myeloid leukocyte mediated immunity	14	1.36585	0.00429429	BLK, MRGPRB1, TREM3, RASGRP1, UNC13D, FGR, RAB44, ITGB2L, NR4A3, F2RL1, CTSG, IL13RA2, DNASE1L3, LAT	838	135	20051	2.48134	1	0.0477103	0.0436138
GOTERM_BP_FAT	GO:0032637~interleukin-8 production	10	0.97561	0.00429913	FCNB, IL1B, CHIL1, F2RL1, CD244A, PTPN22, PRG3, NOD2, TLR6, TNF	838	76	20051	3.14832	1	0.0477103	0.0436138
GOTERM_MF_FAT	GO:0005126~cytokine receptor binding	25	2.43902	0.00436086	CX3CR1, IL1RN, IL1RAP, GATA3, TNF, CXCL15, STAP1, TNFSF11, IL12A, CD300LF, IL12RB1, CCL17, GM10591, NTRK1, CCL22, TNFSF14, OSM, TRAF1, GREM1, IL1A, CD40LG, IL1B, 2610528A11RIK, LTA, TNFSF8	738	329	18102	1.86386	0.992866	0.136187	0.132575
GOTERM_BP_FAT	GO:0002526~acute inflammatory response	15	1.46341	0.00437317	CR2, IL1RN, GATA3, TNF, ADRA2A, IL1A, SERPINA1B, F8, FUT7, CD6, IL1B, CXCR2, TNFSF11, CCR7, ADAM8	838	151	20051	2.37687	1	0.0484504	0.0442903
GOTERM_BP_FAT	GO:0070372~regulation of ERK1 and ERK2 cascade	26	2.53659	0.00441252	RAMP3, RGS14, PTPN22, NOD2, PRKCZ, RASGRP1, TBC1D10C, TNFSF11, CCL17, FGF23, SLAMF1, HAVCR2, GM10591, NTRK1, CCL22, FGG, GPR55, L1CAM, SCIMP, MARCO, TIAM1, IL1A, CD4, IL1B, CHIL1, F2RL1	838	339	20051	1.83513	1	0.0487721	0.0445844
GOTERM_BP_FAT	GO:0044403~symbiosis, encompassing mutualism through parasitism	49	4.78049	0.00441701	TOP2A, CD40, TRIM30B, PGLYRP2, TRIM30C, FLT3, PRF1, CGAS, PTPN22, TREM3, TNF, RAB43, FCNB, ITGAX, IL12A, CTSG, SKP2, OASL1, PROX1, IFIT1BL1, FOXP3, UNC13D, CH25H, SPINT1, CD8A, IL1B, OAS3, TRIM59, TLR13, LEF1, TMPRSS2, OAS1C, GATA3, SLFN9, TSPAN32, TBX21, PMAIP1, IL12RB1, IFI206, GPR15, IFNLR1, POU2F2, AICDA, DCLK1, CD4, TREML4, F2RL1, PTX3, NECTIN4	838	777	20051	1.50892	1	0.0487721	0.0445844
GOTERM_BP_FAT	GO:0043122~regulation of I-kappaB kinase/NF-kappaB signaling	19	1.85366	0.00447075	CX3CR1, UNC5CL, CD40, TRIM30B, TRIM30C, RHOH, NLRC3, NOD2, TRAF1, TNF, IL1A, CD4, IL1B, F2RL1, TNFSF11, TRIM59, TLR6, NFKBID, CARD11	838	217	20051	2.09501	1	0.0492829	0.0450514
GOTERM_BP_FAT	GO:0051984~positive regulation of chromosome segregation	8	0.780488	0.00449734	CENPE, CCNB1, DDX11, CDCA8, BIRC5, NCAPG, CDC6, AURKB	838	50	20051	3.82835	1	0.0494355	0.0451909
GOTERM_BP_FAT	GO:0010604~positive regulation of macromolecule metabolic process	180	17.561	0.00449959	FOXA1, IL1RN, EHF, CD80, PRDM1, FZD10, TNF, IKZF3, IKZF4, CDC20, SPIB, SPIC, CDH1, MYB, TNFSF11, IL12A, NEK2, MAP3K9, SKP2, ZFP287, NANOS1, EOMES, UNC5CL, MEF2B, BORA, DDX11, RFX3, BHLHA15, RUNX3, FOXP3, RUNX2, RUNX1, TIAM1, CLDN4, CLDN3, NAIP6, CHIL1, ZFP296, PADI2, GSAP, ADAM8, TNIK, LMX1B, DNA2, PKP3, TOX, SKAP1, BLM, CDCA2, TXK, TGFA, CDCA8, LPAR2, GATA3, MEFV, PRDM11, PRKCZ, RASGRP1, RAD51AP…	838	3589	20051	1.20003	1	0.0494355	0.0451909
GOTERM_BP_FAT	GO:0019674~NAD metabolic process	9	0.878049	0.00453018	SLC37A2, KYNU, HAAO, AFMID, QPRT, ART2A, ART2B, NUDT17, IDO1	838	63	20051	3.41817	1	0.0496888	0.0454224
GOTERM_BP_FAT	GO:0031297~replication fork processing	7	0.682927	0.00457559	MMS22L, BLM, RAD51, DDX11, TONSL, DNA2, CENPS	838	38	20051	4.40764	1	0.0501035	0.0458015
GOTERM_BP_FAT	GO:0050729~positive regulation of inflammatory response	16	1.56098	0.00462058	ITGA2, OSM, NOD2, MEFV, TNF, IL17RB, CD6, IL1B, TARM1, LTA, CD28, TNFSF11, CCR7, ADAM8, TLR6, IDO1	838	168	20051	2.27878	1	0.0505122	0.0461752
GOTERM_BP_FAT	GO:0048302~regulation of isotype switching to IgG isotypes	5	0.487805	0.00464243	CD40, ATAD5, TBX21, CD28, FOXP3	838	17	20051	7.03741	1	0.0506671	0.0463167
GOTERM_MF_FAT	GO:0005125~cytokine activity	20	1.95122	0.0046884	GM10591, IL1RN, CCL22, TNFSF14, OSM, IL36G, TNF, CXCL15, GREM1, IL1A, CD40LG, IL1B, LTA, SPP1, 2610528A11RIK, TNFSF11, TNFSF8, IL12A, CCL17, WNT4	738	241	18102	2.03556	0.995083	0.136187	0.132575
GOTERM_MF_FAT	GO:0010997~anaphase-promoting complex binding	4	0.390244	0.00469612	CDC20, CCNF, PLK1, CLSPN	738	9	18102	10.9015	0.995126	0.136187	0.132575
GOTERM_MF_FAT	GO:0032393~MHC class I receptor activity	4	0.390244	0.00469612	LILRA6, PIRA13, CD160, PIRA12	738	9	18102	10.9015	0.995126	0.136187	0.132575
GOTERM_BP_FAT	GO:0002523~leukocyte migration involved in inflammatory response	6	0.585366	0.00470326	ITGB2L, FUT7, SLAMF8, ADAM8, CCR6, SLAMF1	838	27	20051	5.31716	1	0.0511761	0.046782
GOTERM_BP_FAT	GO:0007098~centrosome cycle	13	1.26829	0.0047046	STIL, CEP295, CCNF, PLK1, KIF11, BRCA1, NDC80, HAUS8, KIFC1, SASS6, PCLAF, RTTN, NEK2	838	121	20051	2.57069	1	0.0511761	0.046782
GOTERM_BP_FAT	GO:0071706~tumor necrosis factor superfamily cytokine production	18	1.7561	0.0048799	CX3CR1, ARG2, FLT3, PTPN22, NLRC3, NOD2, OAS1C, FOXP3, RASGRP1, IL1A, OAS3, TNFRSF8, CCR7, ADAM8, TLR6, GPR18, SLAMF1, HAVCR2	838	202	20051	2.13213	1	0.0529955	0.0484452
GOTERM_BP_FAT	GO:0036230~granulocyte activation	8	0.780488	0.00502918	ITGB2L, IL18RAP, CXCR2, F2RL1, CTSG, PRG3, TNF, DNASE1L3	838	51	20051	3.75329	1	0.0544619	0.0497857
GOTERM_BP_FAT	GO:0002925~positive regulation of humoral immune response mediated by circulating immunoglobulin	4	0.390244	0.00503971	LTA, FCER2A, NOD2, TNF	838	9	20051	10.6343	1	0.0544619	0.0497857
GOTERM_BP_FAT	GO:0060556~regulation of vitamin D biosynthetic process	4	0.390244	0.00503971	VDR, IL1B, GFI1, TNF	838	9	20051	10.6343	1	0.0544619	0.0497857
GOTERM_BP_FAT	GO:0007163~establishment or maintenance of cell polarity	20	1.95122	0.00508536	RIPOR2, CARMIL1, CARMIL2, PATJ, SPAG5, PLK1, RHOH, CD3G, FRMD4A, GATA3, SYNE4, CENPA, PRKCZ, NDC80, PARVG, SAPCD2, CCR7, KIF2C, SPDL1, KIF20B	838	237	20051	2.01917	1	0.0548653	0.0501545
GOTERM_BP_FAT	GO:0070507~regulation of microtubule cytoskeleton organization	19	1.85366	0.00515221	RIPOR2, STIL, PATJ, BORA, SPAG5, CEP295, CCNF, PLK1, CKAP2, KIF11, SLAIN1, CCSAP, TPX2, KIFC1, SASS6, TACC3, TRIM36, NEK2, CDK5R1	838	220	20051	2.06644	1	0.0554957	0.0507307
GOTERM_BP_FAT	GO:0001773~myeloid dendritic cell activation	7	0.682927	0.00522036	KLRK1, CAMK4, CD244A, TSPAN32, BATF, SLAMF1, HAVCR2	838	39	20051	4.29463	1	0.0560077	0.0511988
GOTERM_BP_FAT	GO:0051482~positive regulation of cytosolic calcium ion concentration involved in phospholipase C-activating G-protein coupled signaling pathway	7	0.682927	0.00522036	GPR174, P2RY10, GPR35, GPR55, F2RL1, P2RY10B, GPR18	838	39	20051	4.29463	1	0.0560077	0.0511988
GOTERM_BP_FAT	GO:0010647~positive regulation of cell communication	110	10.7317	0.00522523	FOXA1, IL1RN, GPR68, GFI1, FZD10, TNF, GPR174, ENPP1, TNFSF11, IL12A, MAP3K9, SKP2, UNC5CL, RUNX3, RUNX1, TIAM1, ARC, DEPDC1B, NAIP6, RRAGB, CD8A, CHIL1, CD226, ADAM8, TNIK, CARD11, RTN4R, BLK, TEDC1, TXK, SHOX2, ILDR1, TGFA, LPAR2, GATA3, P2RY10B, PRKCZ, RASGRP1, TRPM2, CRACR2A, TESPA1, PMAIP1, STAP1, KCNN4, SLC15A3, CD300LF, FGF23, BCL2L14, SLAMF1, GM10591, TNFSF14, VDR, L1CAM, MARCO, TREML4, C…	838	2056	20051	1.28015	1	0.0560077	0.0511988
GOTERM_BP_FAT	GO:0031023~microtubule organizing center organization	14	1.36585	0.00549292	STIL, PATJ, CEP295, CCNF, PLK1, KIF11, BRCA1, NDC80, HAUS8, KIFC1, SASS6, PCLAF, RTTN, NEK2	838	139	20051	2.40993	1	0.0586861	0.0536472
GOTERM_BP_FAT	GO:0007127~meiosis I	14	1.36585	0.00549292	TOP2A, PLK1, HASPIN, NDC80, RAD51AP1, CENPE, CCNB2, RAD51, CCNE2, ESPL1, BIRC5, TRIP13, MYBL1, CENPS	838	139	20051	2.40993	1	0.0586861	0.0536472
GOTERM_BP_FAT	GO:0032732~positive regulation of interleukin-1 production	10	0.97561	0.00556235	PANX1, IFI206, F2RL1, CCR7, NOD2, NLRC4, TLR6, MEFV, TNF, HAVCR2	838	79	20051	3.02876	1	0.0592359	0.0541498
GOTERM_BP_FAT	GO:0032677~regulation of interleukin-8 production	10	0.97561	0.00556235	FCNB, IL1B, CHIL1, F2RL1, CD244A, PTPN22, PRG3, NOD2, TLR6, TNF	838	79	20051	3.02876	1	0.0592359	0.0541498
GOTERM_BP_FAT	GO:0045581~negative regulation of T cell differentiation	8	0.780488	0.00560692	CDKN2A, TBX21, DTX1, CTLA4, FOXP3, NFKBID, RUNX3, RUNX1	838	52	20051	3.68111	1	0.0596142	0.0544957
GOTERM_BP_FAT	GO:0043087~regulation of GTPase activity	27	2.63415	0.00565107	ARHGAP11A, RTN4R, RIPOR2, CD40, RGS14, RASAL1, FZD10, ARHGAP15, RASAL3, RASGRP1, ARHGAP22, RGS1, RASGEF1B, TBC1D30, TBC1D10C, CCR7, PLXNC1, ECT2, CCL17, WNT4, PROM2, RALGPS2, GM10591, NTRK1, CCL22, TIAM1, F2RL1	838	364	20051	1.77482	1	0.0599869	0.0548363
GOTERM_BP_FAT	GO:0010646~regulation of cell communication	183	17.8537	0.00571249	FOXA1, RIPOR2, FCMR, IL1RN, GPR68, GFI1, SLA, FZD10, SLA2, TNF, GPR174, CDC20, CDH1, RGS1, GRAP2, TBC1D10C, ENPP1, TNFSF11, IL12A, FAM3D, UBASH3A, MAP3K9, SKP2, TNFRSF4, RNF43, UNC5CL, CISH, IL1R2, RFX3, SHISA3, IFT80, RUNX3, LAX1, RUNX2, RUNX1, TIAM1, ARC, DEPDC1B, NAIP6, RRAGB, CD8A, CHIL1, PADI2, CD226, ADAM8, TNIK, GM6377, CARD11, RTN4R, BLK, TEDC1, TXK, SHOX2, ILDR1, DTX1, TGFA, LPAR2, RASAL…	838	3671	20051	1.19278	1	0.0605413	0.0553431
GOTERM_CC_FAT	GO:0097149~centralspindlin complex	3	0.292683	0.00573121	RACGAP1, KIF23, ECT2	743	3	16713	22.4939	0.980384	0.0928448	0.0879582
GOTERM_CC_FAT	GO:0034451~centriolar satellite	13	1.26829	0.00578703	PATJ, SPAG5, TRAT1, PLK1, KCTD1, NLRC3, KNSTRN, IL17RB, GPR174, SASS6, TACC3, DLGAP5, CEP55	743	117	16713	2.49933	0.981123	0.0928448	0.0879582
GOTERM_BP_FAT	GO:0071674~mononuclear cell migration	11	1.07317	0.00581618	GM10591, GREM1, CX3CR1, CCL22, JAML, SLAMF8, TNFSF11, CCR7, CTSG, CCL17, SLAMF1	838	94	20051	2.79999	1	0.0615414	0.0562573
GOTERM_CC_FAT	GO:0005657~replication fork	10	0.97561	0.00583674	PIF1, MMS22L, WDHD1, BLM, UHRF1, PRIM1, POLE2, TONSL, MCM10, POLE	743	75	16713	2.99919	0.981758	0.0928448	0.0879582
GOTERM_BP_FAT	GO:0023051~regulation of signaling	184	17.9512	0.00585684	FOXA1, RIPOR2, FCMR, IL1RN, GPR68, GFI1, SLA, FZD10, SLA2, TNF, GPR174, CDC20, CDH1, RGS1, GRAP2, TBC1D10C, ENPP1, TNFSF11, IL12A, FAM3D, UBASH3A, MAP3K9, SKP2, TNFRSF4, RNF43, UNC5CL, CISH, IL1R2, RFX3, SHISA3, IFT80, RUNX3, LAX1, RUNX2, RUNX1, TIAM1, ARC, DEPDC1B, NAIP6, RRAGB, CD8A, CHIL1, PADI2, CD226, ADAM8, TNIK, GM6377, CARD11, RTN4R, BLK, TEDC1, TXK, SHOX2, ILDR1, DTX1, TGFA, LPAR2, RASAL…	838	3695	20051	1.1915	1	0.0618723	0.0565598
GOTERM_BP_FAT	GO:0023056~positive regulation of signaling	110	10.7317	0.0058875	FOXA1, IL1RN, GPR68, GFI1, FZD10, TNF, GPR174, ENPP1, TNFSF11, IL12A, MAP3K9, SKP2, UNC5CL, RUNX3, RUNX1, TIAM1, ARC, DEPDC1B, NAIP6, RRAGB, CD8A, CHIL1, CD226, ADAM8, TNIK, CARD11, RTN4R, BLK, TEDC1, TXK, SHOX2, ILDR1, TGFA, LPAR2, GATA3, P2RY10B, PRKCZ, RASGRP1, TRPM2, CRACR2A, TESPA1, PMAIP1, STAP1, KCNN4, SLC15A3, CD300LF, FGF23, BCL2L14, SLAMF1, GM10591, TNFSF14, VDR, L1CAM, MARCO, TREML4, C…	838	2064	20051	1.27519	1	0.0620966	0.0567649
GOTERM_BP_FAT	GO:0045622~regulation of T-helper cell differentiation	7	0.682927	0.00592924	TBX21, MYB, CCR7, GATA3, FOXP3, NFKBID, PRKCZ	838	40	20051	4.18726	1	0.0623374	0.056985
GOTERM_BP_FAT	GO:0042832~defense response to protozoan	7	0.682927	0.00592924	CD40, GBP8, TLR12, ENPP1, IL12A, TSPAN32, BATF	838	40	20051	4.18726	1	0.0623374	0.056985
GOTERM_CC_FAT	GO:0042105~alpha-beta T cell receptor complex	4	0.390244	0.00598767	TRBV19, CD3G, CD3E, CD3D	743	9	16713	9.99731	0.983557	0.093081	0.088182
GOTERM_BP_FAT	GO:1905517~macrophage migration	9	0.878049	0.0060245	CX3CR1, GPR35, MST1, SLAMF8, STAP1, ENPP1, CCR7, MCOLN2, SLAMF1	838	66	20051	3.2628	1	0.0631376	0.0577165
GOTERM_BP_FAT	GO:0032731~positive regulation of interleukin-1 beta production	9	0.878049	0.0060245	PANX1, IFI206, F2RL1, CCR7, NOD2, NLRC4, TLR6, MEFV, TNF	838	66	20051	3.2628	1	0.0631376	0.0577165
GOTERM_BP_FAT	GO:0002064~epithelial cell development	23	2.2439	0.00616942	NTRK1, FOXA1, RIPOR2, ST14, BCL11B, RFX3, PRDM1, PROX1, BHLHA15, TNF, FOXP3, IL1A, BFSP2, CLDN3, RAB25, MARVELD2, POF1B, CDH1, IL1B, MAP7, F2RL1, INSM1, TJP3	838	294	20051	1.87186	1	0.0645537	0.059011
GOTERM_BP_FAT	GO:0046638~positive regulation of alpha-beta T cell differentiation	8	0.780488	0.00623291	ZAP70, MYB, CCR7, FOXP3, NFKBID, PRKCZ, RUNX3, RUNX1	838	53	20051	3.61165	1	0.0651147	0.0595238
GOTERM_BP_FAT	GO:0030183~B cell differentiation	16	1.56098	0.00636761	NTRK1, CR2, BCL11A, FLT3, POU2F2, SPIB, CD40LG, CD19, MYB, SLAMF8, ENPP1, CD27, IGHE, MS4A1, IL9R, CARD11	838	174	20051	2.2002	1	0.0664166	0.060714
GOTERM_BP_FAT	GO:0030003~cellular cation homeostasis	45	4.39024	0.00639651	CX3CR1, CD40, RAMP3, FPR1, CXCR5, P2RY10B, CACNA1E, GPR174, CACNA1I, TRPM2, CD19, CXCR2, SPP1, SLAMF8, CCR8, CCR7, CCR6, FFAR1, CCR4, SLC39A4, CCR3, TASL, P2RY10, XCR1, FCRL5, VDR, GPR35, TESC, GPR55, SLC4A8, IL1A, CD4, XK, LCK, SLC9A7, IL1B, ACKR4, F2RL1, HAP1, RAB39, MS4A1, GM6377, HAMP, GPR18, ATP6V1B1	838	713	20051	1.51013	1	0.0666127	0.0608932
GOTERM_BP_FAT	GO:0031325~positive regulation of cellular metabolic process	181	17.6585	0.00652043	FOXA1, IL1RN, EHF, CD80, FZD10, TNF, IKZF3, IKZF4, CDC20, SPIB, SPIC, CDH1, MYB, TNFSF11, IL12A, NEK2, CD244A, MAP3K9, SKP2, ZFP287, NANOS1, EOMES, UNC5CL, MEF2B, BORA, DDX11, RFX3, BHLHA15, RUNX3, FOXP3, RUNX2, RUNX1, TIAM1, CLDN4, CLDN3, NAIP6, CHIL1, ZFP296, PADI2, GSAP, ADAM8, TNIK, LMX1B, DNA2, TOX, SKAP1, BLM, CDCA2, SLC45A3, TXK, TGFA, CDCA8, LPAR2, GATA3, MEFV, PRDM11, PRKCZ, RASGRP1, RAD…	838	3642	20051	1.18913	1	0.067796	0.0619749
GOTERM_BP_FAT	GO:2000401~regulation of lymphocyte migration	9	0.878049	0.00659758	RIPOR2, TNFSF14, 2610528A11RIK, PADI2, MADCAM1, CCR7, ADAM8, CCR6, GCSAM	838	67	20051	3.2141	1	0.0684902	0.0626095
GOTERM_BP_FAT	GO:0009893~positive regulation of metabolic process	194	18.9268	0.00674909	IL1RN, EHF, FZD10, IKZF3, IKZF4, CDC20, SPIB, SPIC, MYB, TNFSF11, CD244A, IL12A, SKP2, ZFP287, MEF2B, DDX11, RFX3, BHLHA15, RUNX3, RUNX2, RUNX1, TIAM1, CLDN4, CLDN3, ZFP296, PADI2, GSAP, DNA2, SKAP1, CDCA2, SLC45A3, TXK, CDCA8, LPAR2, TGFA, GATA3, MEFV, PRDM11, PRKCZ, CRACR2A, KLRK1, CD19, HIVEP3, SLAMF1, PROM2, GM10591, NFE2, EGR2, EGR3, LRRN3, BCL11B, BCL11A, PLK1, EAF2, IL36G, IFNLR1, CDC7, CD…	838	3936	20051	1.17934	1	0.0699529	0.0639466
GOTERM_MF_FAT	GO:0003774~motor activity	12	1.17073	0.00678421	CENPE, KIF18B, KIFC1, GPR88, KIF23, KIF2C, KIF22, KIF20A, KIF11, KIF20B, KIF15, KIF4	738	114	18102	2.58194	0.999547	0.191824	0.186735
KEGG_PATHWAY	mmu05140:Leishmaniasis	9	0.878049	0.00679294	H2-EB2, IL1A, ITGB2L, IL1B, H2-OB, IL12A, H2-OA, TNF, MAPK13	363	70	8998	3.18701	0.844452	0.0641816	0.0580914
GOTERM_BP_FAT	GO:0050730~regulation of peptidyl-tyrosine phosphorylation	22	2.14634	0.00687259	CD40, CD80, OSM, TGFA, PTPN22, NOD2, CD3E, TNF, PRKCZ, LRP8, SAMSN1, ADRA2A, GREM1, CD4, ITGB2L, ERBB3, BANK1, LCK, ABI3, STAP1, IL12A, IL9R	838	279	20051	1.88673	1	0.0708751	0.0647897
GOTERM_BP_FAT	GO:0051297~centrosome organization	13	1.26829	0.00689995	STIL, CEP295, CCNF, PLK1, KIF11, BRCA1, NDC80, HAUS8, KIFC1, SASS6, PCLAF, RTTN, NEK2	838	127	20051	2.44924	1	0.0708751	0.0647897
GOTERM_BP_FAT	GO:0032715~negative regulation of interleukin-6 production	8	0.780488	0.00690952	BANK1, FLT3, PTPN22, NLRC3, FOXP3, TNF, SLAMF1, HAVCR2	838	54	20051	3.54477	1	0.0708751	0.0647897
GOTERM_BP_FAT	GO:0046596~regulation of viral entry into host cell	8	0.780488	0.00690952	CH25H, FCNB, TRIM30B, CD4, TRIM30C, TMPRSS2, TRIM59, PTX3	838	54	20051	3.54477	1	0.0708751	0.0647897
GOTERM_BP_FAT	GO:0032270~positive regulation of cellular protein metabolic process	94	9.17073	0.00692592	CD40, IL1RN, FLT3, CD80, PTPN22, BRCA1, FZD10, CD3E, TNF, CDC20, MYB, TNFSF11, IL12A, CCR7, MAP3K9, SKP2, HAVCR2, UNC5CL, BORA, ITGA2, CEP295, FGG, TRAF1, PROX1, FOXP3, ADRA2A, GREM1, IL1A, TIAM1, CLDN4, CLDN3, NAIP6, LCK, BANK1, IL1B, CHIL1, BIRC5, ADAM8, TLR6, TNIK, CX3CR1, RAMP3, CDCA2, UHRF1, TGFA, CDCA8, LPAR2, NLRC4, NOD2, GATA3, MEFV, PRKCZ, LRP8, RASGRP1, AURKB, CCNB1, CRACR2A, ERBB3, PMA…	838	1733	20051	1.29784	1	0.0708751	0.0647897
GOTERM_BP_FAT	GO:2000510~positive regulation of dendritic cell chemotaxis	4	0.390244	0.00697785	CCR7, IL12A, CCR6, SLAMF1	838	10	20051	9.57088	1	0.0708751	0.0647897
GOTERM_BP_FAT	GO:0046218~indolalkylamine catabolic process	4	0.390244	0.00697785	KYNU, HAAO, AFMID, IDO1	838	10	20051	9.57088	1	0.0708751	0.0647897
GOTERM_BP_FAT	GO:2001187~positive regulation of CD8-positive, alpha-beta T cell activation	4	0.390244	0.00697785	CD244A, PTPN22, RUNX3, RUNX1	838	10	20051	9.57088	1	0.0708751	0.0647897
GOTERM_BP_FAT	GO:0006569~tryptophan catabolic process	4	0.390244	0.00697785	KYNU, HAAO, AFMID, IDO1	838	10	20051	9.57088	1	0.0708751	0.0647897
GOTERM_BP_FAT	GO:1902412~regulation of mitotic cytokinesis	4	0.390244	0.00697785	CDCA8, BIRC5, KIF20B, AURKB	838	10	20051	9.57088	1	0.0708751	0.0647897
GOTERM_BP_FAT	GO:0042436~indole-containing compound catabolic process	4	0.390244	0.00697785	KYNU, HAAO, AFMID, IDO1	838	10	20051	9.57088	1	0.0708751	0.0647897
GOTERM_BP_FAT	GO:0090306~spindle assembly involved in meiosis	4	0.390244	0.00697785	CENPE, CCNB2, ASPM, NDC80	838	10	20051	9.57088	1	0.0708751	0.0647897
GOTERM_BP_FAT	GO:0002858~regulation of natural killer cell mediated cytotoxicity directed against tumor cell target	4	0.390244	0.00697785	KLRK1, CD226, IL12A, HAVCR2	838	10	20051	9.57088	1	0.0708751	0.0647897
GOTERM_BP_FAT	GO:0000212~meiotic spindle organization	5	0.487805	0.00707581	CENPE, CCNB2, ASPM, ESPL1, NDC80	838	19	20051	6.29663	1	0.0716494	0.0654975
GOTERM_BP_FAT	GO:0016045~detection of bacterium	5	0.487805	0.00707581	PGLYRP2, NAIP6, NOD2, NLRC4, TLR6	838	19	20051	6.29663	1	0.0716494	0.0654975
GOTERM_BP_FAT	GO:0032680~regulation of tumor necrosis factor production	17	1.65854	0.00713981	CX3CR1, ARG2, FLT3, PTPN22, NLRC3, NOD2, OAS1C, FOXP3, RASGRP1, IL1A, OAS3, TNFRSF8, CCR7, TLR6, GPR18, SLAMF1, HAVCR2	838	193	20051	2.10758	1	0.0721865	0.0659885
GOTERM_BP_FAT	GO:0071219~cellular response to molecule of bacterial origin	25	2.43902	0.00735773	CX3CR1, CD40, CEBPE, CD80, GFI1, PTPN22, NOD2, TNF, NUGGC, CXCL15, KLRK1, STAP1, IL12A, CTSG, HAVCR2, CR2, GCH1, IL36G, PDCD1LG2, SCIMP, AICDA, IL1A, CD6, IL1B, TLR6	838	335	20051	1.78561	1	0.0742759	0.0678984
GOTERM_BP_FAT	GO:0030855~epithelial cell differentiation	50	4.87805	0.00739131	FOXA1, RIPOR2, EHF, GFI1, SLC7A11, PRDM1, SYNE4, TNF, DNPH1, TGM1, POF1B, CDH1, MADCAM1, DSP, ITGA2, RFX3, KAZN, PROX1, BHLHA15, KRT5, FOXP3, UPK3A, GREM1, IL1A, CLDN3, ELF3, IL1B, ALDOC, IRF6, CSTDC4, LEF1, GATA3, STFA2L1, MARVELD2, RAB25, MAP7, WNT4, E2F8, TBX1, NTRK1, MCOLN3, ST14, BCL11B, VDR, BFSP2, KRT17, KRT14, F2RL1, INSM1, TJP3	838	819	20051	1.46076	1	0.0745008	0.0681041
GOTERM_BP_FAT	GO:0090169~regulation of spindle assembly	6	0.585366	0.00748999	RIPOR2, STIL, SPAG5, PLK1, SASS6, CCSAP	838	30	20051	4.78544	1	0.0753802	0.0689079
GOTERM_MF_FAT	GO:0042288~MHC class I protein binding	7	0.682927	0.00752804	KLRK1, H2-M2, KLRA17, CD8B1, H2-Q2, CD244A, PILRA	738	43	18102	3.993	0.999806	0.207664	0.202155
GOTERM_CC_FAT	GO:0016328~lateral plasma membrane	10	0.97561	0.00753874	CLDN4, CLDN3, ERBB3, EPCAM, CDH1, CLDN7, TACSTD2, DSG2, SLC16A3, ATP6V1B1	743	78	16713	2.88384	0.99435	0.114187	0.108177
GOTERM_BP_FAT	GO:0042092~type 2 immune response	7	0.682927	0.00755338	ARG2, TBX21, NOD2, GATA3, PRKCZ, BATF, IDO1	838	42	20051	3.98787	1	0.0759022	0.0693851
GOTERM_BP_FAT	GO:0070371~ERK1 and ERK2 cascade	25	2.43902	0.00764127	RAMP3, RGS14, PTPN22, NOD2, PRKCZ, RASGRP1, TBC1D10C, TNFSF11, CCL17, FGF23, CCR3, SLAMF1, HAVCR2, GM10591, NTRK1, CCL22, FGG, GPR55, SCIMP, MARCO, IL1A, CD4, IL1B, CHIL1, F2RL1	838	336	20051	1.7803	1	0.0766685	0.0700857
GOTERM_BP_FAT	GO:0002711~positive regulation of T cell mediated immunity	10	0.97561	0.0076713	IL1B, TBX21, H2-M2, H2-Q2, IL12A, GATA3, FOXP3, PRKCZ, IL18R1, SLAMF1	838	83	20051	2.8828	1	0.0768529	0.0702542
GOTERM_CC_FAT	GO:0005871~kinesin complex	8	0.780488	0.00776397	KIF18B, KIFC1, KIF23, KIF2C, KIF22, KIF20A, KIF20B, KIF15	743	52	16713	3.46061	0.995162	0.114187	0.108177
GOTERM_CC_FAT	GO:0001533~cornified envelope	9	0.878049	0.00784618	DSP, KRT17, KRT14, KAZN, KRT5, PKP3, CSTDC4, STFA2L1, SERPINB5	743	65	16713	3.11455	0.995429	0.114187	0.108177
KEGG_PATHWAY	mmu04115:p53 signaling pathway	9	0.878049	0.00803664	CCNB2, CCNB1, RRM2, CCNE2, CDKN2A, CDK1, PMAIP1, GTSE1, SERPINB5	363	72	8998	3.09848	0.889514	0.0734013	0.0664362
GOTERM_BP_FAT	GO:0071639~positive regulation of monocyte chemotactic protein-1 production	5	0.487805	0.00855722	IL1B, OAS3, OAS1C, NOD2, MCOLN2	838	20	20051	5.9818	1	0.0849084	0.077618
GOTERM_BP_FAT	GO:0002689~negative regulation of leukocyte chemotaxis	5	0.487805	0.00855722	GREM1, SLAMF8, PADI2, STAP1, GPR18	838	20	20051	5.9818	1	0.0849084	0.077618
GOTERM_BP_FAT	GO:0002220~innate immune response activating cell surface receptor signaling pathway	5	0.487805	0.00855722	FCNB, KLRK1, KLRD1, KLRC1, KLRI1	838	20	20051	5.9818	1	0.0849084	0.077618
GOTERM_BP_FAT	GO:0019363~pyridine nucleotide biosynthetic process	5	0.487805	0.00855722	KYNU, HAAO, AFMID, QPRT, IDO1	838	20	20051	5.9818	1	0.0849084	0.077618
GOTERM_BP_FAT	GO:0043373~CD4-positive, alpha-beta T cell lineage commitment	5	0.487805	0.00855722	TBX21, SLAMF6, TOX, FOXP3, BATF	838	20	20051	5.9818	1	0.0849084	0.077618
GOTERM_BP_FAT	GO:0019359~nicotinamide nucleotide biosynthetic process	5	0.487805	0.00855722	KYNU, HAAO, AFMID, QPRT, IDO1	838	20	20051	5.9818	1	0.0849084	0.077618
GOTERM_BP_FAT	GO:0043507~positive regulation of JUN kinase activity	9	0.878049	0.00856555	TIAM1, IL1RN, CD40LG, IL1B, CCR7, MAP3K9, FZD10, TLR6, TNF	838	70	20051	3.07636	1	0.0849084	0.077618
GOTERM_BP_FAT	GO:0040012~regulation of locomotion	66	6.43902	0.00858938	RIPOR2, CD40, IL1RN, ITGA2B, LAMC2, PTPN22, TNF, ARHGAP4, EPB41L4B, CDH1, ITGAX, IL12A, MADCAM1, CCR7, CCR6, PLXNC1, CCR4, ITGA2, MST1, RHOH, PROX1, CCSAP, ADRA2A, GREM1, FGR, IL1A, TIAM1, CLDN4, CLDN3, IL1B, CLDN7, PADI2, ADAM8, SINHCAF, KIF20B, CHST2, CX3CR1, SEMA3D, LEF1, TACSTD2, NOD2, GATA3, FUT4, FUT7, RAB25, EPCAM, CXCR2, SLAMF8, STAP1, FGF23, WNT4, SLAMF1, CARMIL1, CARMIL2, TNFSF14, ARHGE…	838	1154	20051	1.36845	1	0.0850168	0.0777171
GOTERM_BP_FAT	GO:0043297~apical junction assembly	10	0.97561	0.00893086	CLDN11, CLDN4, CLDN3, MARVELD2, POF1B, CDH1, CLDN8, CLDN7, ECT2, TNF	838	85	20051	2.81497	1	0.0882642	0.0806857
GOTERM_CC_FAT	GO:0031226~intrinsic component of plasma membrane	104	10.1463	0.00905581	AQP9, ITGA2B, AQP5, SLC28A2B, AQP3, NCMAP, TNF, GPR174, IL18RAP, KLRB1C, ENPP1, IL12A, PRSS8, PLXNC1, GGT1, SLC16A3, SLC39A4, SLC16A5, RNF43, MIGA1, CLDN4, ADAM8, RTN4R, GPR88, LPAR2, P2RY10B, CACNA1E, CACNA1H, TRPM2, CACNA1I, VMN2R97, ADGRG5, CD19, BTLA, SLAMF6, KLRC1, KCNN4, ICOS, CLCA3A1, CLCA3A2, TSPAN1, PROM2, ST14, CD160, ART2A, ART2B, IFNLR1, ITGB2L, SELL, KLRD1, ULBP1, GPR18, LAT, CD22, C…	743	1851	16713	1.26384	0.998016	0.129045	0.122253
GOTERM_BP_FAT	GO:0050801~ion homeostasis	54	5.26829	0.00913909	CD40, SLC7A11, GPR174, ENPP1, TNFSF11, CCR8, CCR7, CCR6, FFAR1, CCR4, SLC39A4, CCR3, TASL, FCRL5, GPR35, TESC, UPK3A, IL1A, HSH2D, LCK, SLC9A7, IL1B, HAP1, RAB39, GM6377, MS4A1, ATP6V1B1, CX3CR1, RAMP3, FPR1, CXCR5, P2RY10B, CACNA1E, CACNA1I, TRPM2, NT5E, CD19, CXCR2, SPP1, SLAMF8, FGF23, TFAP2B, P2RY10, XCR1, VDR, GPR55, KCNJ16, SLC4A8, CD4, XK, ACKR4, F2RL1, HAMP, GPR18	838	910	20051	1.41986	1	0.0901869	0.0824433
GOTERM_BP_FAT	GO:0042368~vitamin D biosynthetic process	4	0.390244	0.0092997	VDR, IL1B, GFI1, TNF	838	11	20051	8.7008	1	0.091498	0.0836418
GOTERM_BP_FAT	GO:0002420~natural killer cell mediated cytotoxicity directed against tumor cell target	4	0.390244	0.0092997	KLRK1, CD226, IL12A, HAVCR2	838	11	20051	8.7008	1	0.091498	0.0836418
GOTERM_BP_FAT	GO:0006874~cellular calcium ion homeostasis	34	3.31707	0.00945711	CX3CR1, CD40, RAMP3, FPR1, CXCR5, P2RY10B, CACNA1E, GPR174, CACNA1I, TRPM2, CD19, CXCR2, SPP1, CCR8, CCR7, CCR6, FFAR1, CCR4, CCR3, P2RY10, XCR1, FCRL5, VDR, GPR35, GPR55, CD4, XK, LCK, IL1B, ACKR4, F2RL1, HAP1, MS4A1, GPR18	838	513	20051	1.58582	1	0.092908	0.0849308
GOTERM_BP_FAT	GO:0043547~positive regulation of GTPase activity	21	2.04878	0.00970254	ARHGAP11A, NTRK1, GM10591, RTN4R, CD40, CCL22, RGS14, FZD10, RASGRP1, ARHGAP22, TIAM1, RASGEF1B, RGS1, TBC1D30, TBC1D10C, F2RL1, CCR7, ECT2, CCL17, RALGPS2, WNT4	838	270	20051	1.86101	1	0.0951773	0.0870052
GOTERM_BP_FAT	GO:2000520~regulation of immunological synapse formation	3	0.292683	0.00987231	CCR7, CLEC2I, HAVCR2	838	4	20051	17.9454	1	0.0965553	0.0882649
GOTERM_BP_FAT	GO:0097022~lymphocyte migration into lymph node	3	0.292683	0.00987231	FUT7, CCR7, FUT4	838	4	20051	17.9454	1	0.0965553	0.0882649
GOTERM_BP_FAT	GO:0045595~regulation of cell differentiation	114	11.122	0.0100228	FOXA1, RIPOR2, PGLYRP2, GPR68, GFI1, PRDM1, TNF, IKZF3, CDC20, CDH1, MYB, GPR171, XLR4B, ENPP1, TNFSF11, IL12A, DLEU2, PLXNC1, RFX3, BHLHA15, RUNX3, FOXP3, UNC13D, RUNX2, RUNX1, TIAM1, ARC, SPINT1, ADAM8, TNIK, KIF20B, TOX, CD101, CARD11, RTN4R, BLM, SLC45A3, SHOX2, TACSTD2, DTX1, RASAL1, GATA3, PRKCZ, RASGRP1, TESPA1, SLAMF8, STAP1, EVI2, ECT2, FGF23, WNT4, PACSIN1, CARMIL1, TFAP2B, EGR2, CARMIL…	838	2191	20051	1.24496	1	0.0978821	0.0894778
GOTERM_CC_FAT	GO:0043596~nuclear replication fork	7	0.682927	0.0100624	MMS22L, WDHD1, PRIM1, POLE2, TONSL, MCM10, POLE	743	42	16713	3.74899	0.99901	0.140463	0.13307
GOTERM_BP_FAT	GO:1903307~positive regulation of regulated secretory pathway	9	0.878049	0.0101019	FGR, CACNA1I, SLC4A8, ITGB2L, CD160, F2RL1, KLRC1, CACNA1H, UNC13D	838	72	20051	2.9909	1	0.0985087	0.0900506
GOTERM_BP_FAT	GO:0051336~regulation of hydrolase activity	63	6.14634	0.0101682	ARHGAP11A, ITK, RIPOR2, FCMR, CD40, SERPINA10, FZD10, TNF, WFDC2, SERPINA1B, CDH1, RASGEF1B, RGS1, TBC1D30, TBC1D10C, CCR7, PLXNC1, OASL1, RALGPS2, ITGA2, DDX11, SERPINA1E, SERPINB5, TIAM1, CLDN4, CLDN3, SPINT1, NAIP6, LCK, OAS3, BIRC5, CSTDC4, IL9R, RTN4R, RGS14, TXK, RASAL1, NLRC4, OAS1C, CST7, MEFV, ARHGAP15, RASAL3, PRKCZ, RASGRP1, STFA2L1, ARHGAP22, SERPINA3F, PMAIP1, WFDC18, ECT2, CCL17, WN…	838	1100	20051	1.37038	1	0.0990082	0.0905072
GOTERM_BP_FAT	GO:0002690~positive regulation of leukocyte chemotaxis	11	1.07317	0.0101954	CX3CR1, RIPOR2, TNFSF14, SELL, IL1B, CXCR2, F2RL1, CCR7, IL12A, CCR6, SLAMF1	838	102	20051	2.58039	1	0.0990121	0.0905108
GOTERM_BP_FAT	GO:0043123~positive regulation of I-kappaB kinase/NF-kappaB signaling	14	1.36585	0.0102039	CX3CR1, UNC5CL, CD40, TRIM30B, TRIM30C, NOD2, TNF, IL1A, CD4, IL1B, F2RL1, TNFSF11, TLR6, CARD11	838	150	20051	2.23321	1	0.0990121	0.0905108
GOTERM_BP_FAT	GO:0002923~regulation of humoral immune response mediated by circulating immunoglobulin	5	0.487805	0.0102276	CR2, LTA, FCER2A, NOD2, TNF	838	21	20051	5.69695	1	0.0990121	0.0905108
GOTERM_BP_FAT	GO:0071222~cellular response to lipopolysaccharide	24	2.34146	0.0102286	CX3CR1, CR2, CD40, GCH1, CEBPE, CD80, GFI1, IL36G, PTPN22, NOD2, PDCD1LG2, TNF, SCIMP, NUGGC, AICDA, CXCL15, IL1A, KLRK1, CD6, IL1B, STAP1, CTSG, IL12A, HAVCR2	838	326	20051	1.76151	1	0.0990121	0.0905108
GOTERM_BP_FAT	GO:0050731~positive regulation of peptidyl-tyrosine phosphorylation	17	1.65854	0.0103467	CD40, CD80, OSM, TGFA, NOD2, CD3E, TNF, LRP8, ADRA2A, GREM1, CD4, ERBB3, BANK1, LCK, ABI3, STAP1, IL12A	838	201	20051	2.02369	1	0.100008	0.0914212
GOTERM_BP_FAT	GO:0060429~epithelium development	77	7.5122	0.0105497	FOXA1, RIPOR2, EHF, GFI1, SLC7A11, PRDM1, CELSR1, SYNE4, TNF, DNPH1, TGM1, POF1B, CDH1, ITGAX, ENPP1, TNFSF11, MADCAM1, PRSS8, DSP, EOMES, ARG2, ITGA2, MST1, RIPK4, RFX3, KAZN, PROX1, BHLHA15, KRT5, FOXP3, RUNX3, UPK3A, SERPINB5, RUNX1, GREM1, IL1A, CLDN3, ELF3, SAPCD2, SPINT1, IL1B, ALDOC, IRF6, KIF20B, CSTDC4, LEF1, TACSTD2, GATA3, STFA2L1, MARVELD2, MTHFD1L, RAB25, EPCAM, TBX21, CXCR2, MAP7, W…	838	1396	20051	1.31977	1	0.101746	0.0930098
GOTERM_BP_FAT	GO:0032660~regulation of interleukin-17 production	7	0.682927	0.0105574	ARG2, OSM, SLAMF6, IL12A, NOD2, IL12RB1, FOXP3	838	45	20051	3.72201	1	0.101746	0.0930098
GOTERM_BP_FAT	GO:0010941~regulation of cell death	102	9.95122	0.010612	FOXA1, FCMR, IL1RN, TNF, IKZF3, CDH1, CLEC5A, TNFRSF8, IL12A, MAP3K9, SKP2, TNFRSF4, RUNX3, MELK, NAIP6, CLDN7, ADAM8, RNF122, CARD11, IDO1, BLK, BLM, TGFA, GATA3, PRDM11, PRKCZ, NUGGC, TRPM2, KLRK1, NUAK2, FIGNL1, PMAIP1, EVI2, ECT2, BCL2L14, WNT4, BARD1, TFAP2B, STIL, EGR3, BCL11B, VDR, CD160, PLK1, PYCR1, NR4A3, SELL, CDK1, CD27, IL7R, NFKBID, TOP2A, CD40, CD3G, BRCA1, SLC7A11, NAT8F4, RNF157,…	838	1935	20051	1.26128	1	0.102123	0.093355
GOTERM_MF_FAT	GO:0097367~carbohydrate derivative binding	118	11.5122	0.010722	ERCC6L, PGLYRP2, RASEF, MKI67, MPO, GIMAP7, RAB43, FCNB, RAB44, ENPP1, NEK2, MAP3K9, STK32C, GBP8, DDX11, MATK, HASPIN, RUNX3, RUNX2, RUNX1, CNBD2, MELK, NAIP6, RAB37, RRAGB, CHIL1, TNIK, RAB39, DNA2, KIF20A, KIF20B, ABCG3, CLEC4E, CDKL1, RTN4R, BLK, PIF1, BLM, TXK, HMMR, GVIN1, PRKCZ, NUGGC, GVIN2, TRPM2, CRACR2A, NUAK2, FIGNL1, ATP8B4, UBE2C, PLK1, DCLK2, CDC7, CDC6, L1CAM, DCLK1, KIF18B, SELL,…	738	2345	18102	1.23427	0.999995	0.288728	0.281069
KEGG_PATHWAY	mmu05146:Amoebiasis	11	1.07317	0.0107663	GNA14, ARG2, ITGB2L, LAMB3, IL1B, IL1R2, CTSG, LAMC2, IL12A, TNF, PLCB2	363	107	8998	2.54829	0.947929	0.0951602	0.0861304
GOTERM_CC_FAT	GO:0005875~microtubule associated complex	15	1.46341	0.0107863	CDCA8, KIF23, KIF22, MEFV, LRP8, AURKB, KIF15, KIF4, KIF18B, HAUS8, KIFC1, BIRC5, KIF2C, KIF20A, KIF20B	743	158	16713	2.1355	0.9994	0.147557	0.139791
GOTERM_BP_FAT	GO:0034121~regulation of toll-like receptor signaling pathway	9	0.878049	0.0109426	TASL, TREML4, GFI1, F2RL1, PTPN22, NOD2, TLR6, CD300LF, GM6377	838	73	20051	2.94993	1	0.105151	0.0961224
GOTERM_BP_FAT	GO:0050688~regulation of defense response to virus	10	0.97561	0.0111059	TREML4, IL1B, CGAS, PTPN22, IFNLR1, IL12RB1, IFIT1BL1, FOXP3, TSPAN32, OASL1	838	88	20051	2.719	1	0.106565	0.0974151
GOTERM_BP_FAT	GO:0051607~defense response to virus	22	2.14634	0.0112183	IFI206, CD40, PRF1, CGAS, IFNLR1, PTPN22, OAS1C, IFIT1BL1, FOXP3, SLFN9, AICDA, UNC13D, TREML4, CD8A, OAS3, IL1B, ITGAX, F2RL1, PMAIP1, IL12RB1, SKP2, OASL1	838	292	20051	1.80273	1	0.107487	0.098258
GOTERM_BP_FAT	GO:0002828~regulation of type 2 immune response	6	0.585366	0.011258	ARG2, TBX21, NOD2, GATA3, PRKCZ, IDO1	838	33	20051	4.3504	1	0.107711	0.0984623
GOTERM_BP_FAT	GO:0072503~cellular divalent inorganic cation homeostasis	35	3.41463	0.0113497	CX3CR1, CD40, RAMP3, FPR1, CXCR5, P2RY10B, CACNA1E, GPR174, CACNA1I, TRPM2, CD19, CXCR2, SPP1, CCR8, CCR7, CCR6, FFAR1, CCR4, SLC39A4, CCR3, P2RY10, XCR1, FCRL5, VDR, GPR35, GPR55, CD4, XK, LCK, IL1B, ACKR4, F2RL1, HAP1, MS4A1, GPR18	838	539	20051	1.55371	1	0.108289	0.0989909
GOTERM_BP_FAT	GO:0006464~cellular protein modification process	192	18.7317	0.0113513	IL1RN, PGAP1, CD80, GFI1, CCNF, PRDM1, FZD10, TNF, CDC14A, TGM1, CDC20, MTBP, GRAP2, MYB, TBC1D10C, ENPP1, TNFSF11, IL12A, NEK2, MAP3K9, SKP2, TNFRSF4, STK32C, HERC6, EOMES, RNF43, UNC5CL, BORA, CISH, MATK, HASPIN, RUNX3, LAX1, FOXP3, TIAM1, MELK, CLDN3, CCNE2, NAIP6, CHIL1, PADI2, ADAM8, TNIK, CSTDC4, RNF122, CDKL1, BLK, BLM, CDCA2, CDCA3, TXK, DTX1, TGFA, CDCA8, LPAR2, GATA3, MEFV, PRDM11, PRKC…	838	3942	20051	1.1654	1	0.108289	0.0989909
GOTERM_CC_FAT	GO:0098636~protein complex involved in cell adhesion	8	0.780488	0.0115629	ITGB2L, CD80, ITGA2, ITGA2B, CD28, ITGAX, CTLA4, TSPAN32	743	56	16713	3.21342	0.999649	0.155079	0.146917
GOTERM_MF_FAT	GO:0016538~cyclin-dependent protein serine/threonine kinase regulator activity	7	0.682927	0.011567	CCNA2, CCNB2, CCNB1, CCNE2, CDKN2A, CCNF, CDK5R1	738	47	18102	3.65317	0.999998	0.304239	0.296169
GOTERM_BP_FAT	GO:0036211~protein modification process	192	18.7317	0.0115711	IL1RN, PGAP1, CD80, GFI1, CCNF, PRDM1, FZD10, TNF, CDC14A, TGM1, CDC20, MTBP, GRAP2, MYB, TBC1D10C, ENPP1, TNFSF11, IL12A, NEK2, MAP3K9, SKP2, TNFRSF4, STK32C, HERC6, EOMES, RNF43, UNC5CL, BORA, CISH, MATK, HASPIN, RUNX3, LAX1, FOXP3, TIAM1, MELK, CLDN3, CCNE2, NAIP6, CHIL1, PADI2, ADAM8, TNIK, CSTDC4, RNF122, CDKL1, BLK, BLM, CDCA2, CDCA3, TXK, DTX1, TGFA, CDCA8, LPAR2, GATA3, MEFV, PRDM11, PRKC…	838	3944	20051	1.16481	1	0.110226	0.100762
GOTERM_BP_FAT	GO:0032268~regulation of cellular protein metabolic process	145	14.1463	0.0116946	FCMR, IL1RN, CD80, GFI1, CCNF, FZD10, TNF, ZC3H12D, CDC20, MTBP, CDH1, GRAP2, MYB, TBC1D10C, ENPP1, TNFSF11, IL12A, MAP3K9, SKP2, TNFRSF4, NANOS1, UNC5CL, BORA, IL1R2, LAX1, FOXP3, TIAM1, CLDN4, CLDN3, CCNE2, SPINT1, NAIP6, CHIL1, ADAM8, TNIK, CSTDC4, BLM, CDCA2, TGFA, CDCA8, LPAR2, GATA3, MEFV, PRDM11, PRKCZ, SAMSN1, RASGRP1, STFA2L1, CCNB2, CRACR2A, CCNB1, SERPINA3F, PMAIP1, STAP1, WFDC18, CLSP…	838	2887	20051	1.20175	1	0.111243	0.101691
GOTERM_BP_FAT	GO:0046636~negative regulation of alpha-beta T cell activation	7	0.682927	0.0117236	ARG2, TBX21, TARM1, BTLA, FOXP3, RUNX3, RUNX1	838	46	20051	3.6411	1	0.111357	0.101796
GOTERM_BP_FAT	GO:0055065~metal ion homeostasis	45	4.39024	0.0117883	CX3CR1, CD40, RAMP3, FPR1, CXCR5, P2RY10B, CACNA1E, GPR174, CACNA1I, TRPM2, NT5E, CD19, CXCR2, SPP1, CCR8, ENPP1, TNFSF11, CCR7, CCR6, FFAR1, FGF23, CCR4, SLC39A4, CCR3, TFAP2B, P2RY10, XCR1, FCRL5, VDR, GPR35, TESC, GPR55, UPK3A, IL1A, CD4, XK, LCK, IL1B, ACKR4, F2RL1, HAP1, MS4A1, HAMP, GPR18, ATP6V1B1	838	740	20051	1.45503	1	0.111811	0.102211
GOTERM_MF_FAT	GO:0016798~hydrolase activity, acting on glycosyl bonds	13	1.26829	0.0119785	MBD4, ART2A, ART2B, IL1RAP, DNPH1, UNG, NEIL3, IL18RAP, TLR12, TLR11, TLR6, IL18R1, TLR13	738	140	18102	2.27764	0.999999	0.307902	0.299735
GOTERM_BP_FAT	GO:0090267~positive regulation of mitotic cell cycle spindle assembly checkpoint	4	0.390244	0.0120194	CDCA8, BIRC5, AURKB, NDC80	838	12	20051	7.97574	1	0.113351	0.103618
GOTERM_BP_FAT	GO:0072526~pyridine-containing compound catabolic process	4	0.390244	0.0120194	QPRT, ART2A, ART2B, NUDT17	838	12	20051	7.97574	1	0.113351	0.103618
GOTERM_BP_FAT	GO:0033262~regulation of nuclear cell cycle DNA replication	4	0.390244	0.0120194	DBF4, CDC7, NUGGC, AICDA	838	12	20051	7.97574	1	0.113351	0.103618
GOTERM_BP_FAT	GO:0090232~positive regulation of spindle checkpoint	4	0.390244	0.0120194	CDCA8, BIRC5, AURKB, NDC80	838	12	20051	7.97574	1	0.113351	0.103618
GOTERM_BP_FAT	GO:1903504~regulation of mitotic spindle checkpoint	5	0.487805	0.0120953	CCNB1, CDCA8, BIRC5, AURKB, NDC80	838	22	20051	5.438	1	0.113416	0.103678
GOTERM_BP_FAT	GO:0002363~alpha-beta T cell lineage commitment	5	0.487805	0.0120953	TBX21, SLAMF6, TOX, FOXP3, BATF	838	22	20051	5.438	1	0.113416	0.103678
GOTERM_BP_FAT	GO:0090266~regulation of mitotic cell cycle spindle assembly checkpoint	5	0.487805	0.0120953	CCNB1, CDCA8, BIRC5, AURKB, NDC80	838	22	20051	5.438	1	0.113416	0.103678
GOTERM_BP_FAT	GO:0098543~detection of other organism	5	0.487805	0.0120953	PGLYRP2, NAIP6, NOD2, NLRC4, TLR6	838	22	20051	5.438	1	0.113416	0.103678
GOTERM_BP_FAT	GO:0051353~positive regulation of oxidoreductase activity	8	0.780488	0.0121641	DHFR, GCH1, VDR, IL1B, FCER2A, NOD2, TNF, FGF23	838	60	20051	3.19029	1	0.113416	0.103678
GOTERM_BP_FAT	GO:0051298~centrosome duplication	8	0.780488	0.0121641	STIL, KIFC1, CEP295, CCNF, SASS6, RTTN, BRCA1, NDC80	838	60	20051	3.19029	1	0.113416	0.103678
GOTERM_BP_FAT	GO:0051653~spindle localization	8	0.780488	0.0121641	ASPM, SAPCD2, SPAG5, PLK1, NUSAP1, SPDL1, CENPA, NDC80	838	60	20051	3.19029	1	0.113416	0.103678
GOTERM_BP_FAT	GO:1900015~regulation of cytokine production involved in inflammatory response	8	0.780488	0.0121641	CD6, IL1R2, TARM1, NLRC3, NOD2, TLR6, MEFV, TNF	838	60	20051	3.19029	1	0.113416	0.103678
GOTERM_BP_FAT	GO:0031348~negative regulation of defense response	20	1.95122	0.0121877	CX3CR1, CD96, ARG2, IFI206, IL1R2, NLRC3, NOD2, OAS1C, GATA3, MEFV, FOXP3, NT5E, CNR2, OAS3, PBK, SLAMF8, KLRD1, KLRC1, HAMP, HAVCR2	838	258	20051	1.85482	1	0.113476	0.103733
GOTERM_BP_FAT	GO:0043406~positive regulation of MAP kinase activity	16	1.56098	0.0125275	CD40, IL1RN, TGFA, NOD2, FZD10, TNF, RASGRP1, ADRA2A, TIAM1, CD40LG, IL1B, TNFSF11, CCR7, ADAM8, MAP3K9, TLR6	838	188	20051	2.03636	1	0.116476	0.106475
KEGG_PATHWAY	mmu05145:Toxoplasmosis	11	1.07317	0.0129323	H2-EB2, CD40, CD40LG, LAMB3, H2-OB, TLR11, LAMC2, IL12A, H2-OA, TNF, MAPK13	363	110	8998	2.47879	0.971377	0.110733	0.100225
GOTERM_BP_FAT	GO:0006953~acute-phase response	7	0.682927	0.0129777	SERPINA1B, IL1A, F8, IL1RN, IL1B, TNFSF11, TNF	838	47	20051	3.56363	1	0.120492	0.110146
GOTERM_MF_FAT	GO:0019207~kinase regulator activity	19	1.85366	0.0130704	CISH, CDKN2A, TESC, CCNF, TGFA, RHOH, SLA2, CCNA2, GREM1, PKIB, TPX2, CCNB2, CCNB1, DBF4, CD40LG, CCNE2, ERBB3, STAP1, CDK5R1	738	248	18102	1.8792	1	0.320271	0.311775
GOTERM_BP_FAT	GO:0032640~tumor necrosis factor production	16	1.56098	0.0131017	ARG2, FLT3, PTPN22, NLRC3, NOD2, OAS1C, FOXP3, RASGRP1, IL1A, OAS3, TNFRSF8, CCR7, TLR6, GPR18, SLAMF1, HAVCR2	838	189	20051	2.02558	1	0.121471	0.111042
GOTERM_BP_FAT	GO:0032757~positive regulation of interleukin-8 production	8	0.780488	0.0132606	FCNB, IL1B, CHIL1, F2RL1, CD244A, PRG3, NOD2, TNF	838	61	20051	3.13799	1	0.122773	0.112231
GOTERM_CC_FAT	GO:0045171~intercellular bridge	11	1.07317	0.0132917	CENPE, TPX2, PRC1, KCTD1, CDCA8, CDC7, KIF23, KIF20A, CDC6, KIF20B, CEP55	743	100	16713	2.47433	0.999894	0.174836	0.165634
GOTERM_BP_FAT	GO:1901700~response to oxygen-containing compound	109	10.6341	0.013329	FOXA1, LY6I, GPR68, CD80, GFI1, AQP9, AQP3, MPO, TNF, CXCL15, XLR4A, IL18RAP, CDH1, XLR4B, ENPP1, IL12A, GGT1, CD96, DDX11, FOXP3, RUNX2, RUNX1, TIAM1, CLDN4, CLDN3, RRAGB, CLDN7, IDO1, BLM, ILDR1, GATA3, PRKCZ, NUGGC, SLC5A5, TRPM2, CCNB1, FUT7, SERPINA3F, KLRK1, MAP7, STAP1, ECT2, FGF23, EGR2, VDR, BCL11A, PYCR1, IL36G, CDC6, SERPINA3H, AICDA, DHFR, PTPRE, NR4A3, SELL, CDK1, CD27, ACHE, CD40, P…	838	2103	20051	1.24016	1	0.123232	0.112651
GOTERM_BP_FAT	GO:0051247~positive regulation of protein metabolic process	96	9.36585	0.0136915	CD40, IL1RN, FLT3, CD80, PTPN22, BRCA1, FZD10, CD3E, TNF, CDC20, MYB, TNFSF11, IL12A, CCR7, MAP3K9, SKP2, HAVCR2, UNC5CL, BORA, ITGA2, CEP295, FGG, TRAF1, PROX1, FOXP3, ADRA2A, GREM1, IL1A, TIAM1, CLDN4, CLDN3, NAIP6, LCK, BANK1, IL1B, CHIL1, PXYLP1, BIRC5, GSAP, ADAM8, TLR6, TNIK, CX3CR1, RAMP3, CDCA2, UHRF1, TGFA, CDCA8, LPAR2, NLRC4, NOD2, GATA3, MEFV, PRKCZ, LRP8, RASGRP1, AURKB, CCNB1, CRACR…	838	1823	20051	1.26002	1	0.126406	0.115553
KEGG_PATHWAY	mmu05152:Tuberculosis	15	1.46341	0.0137197	H2-EB2, VDR, NOD2, TNF, MAPK13, IL1A, ITGB2L, IL1B, H2-OB, ITGAX, IL12A, TLR6, H2-OA, CALM4, CLEC4E	363	180	8998	2.06566	0.97698	0.113915	0.103106
GOTERM_BP_FAT	GO:0002279~mast cell activation involved in immune response	9	0.878049	0.0137747	BLK, FGR, RAB44, NR4A3, MRGPRB1, IL13RA2, RASGRP1, UNC13D, LAT	838	76	20051	2.83349	1	0.126997	0.116093
GOTERM_BP_FAT	GO:0007266~Rho protein signal transduction	12	1.17073	0.0139472	RTN4R, GPR174, RIPOR2, P2RY10, RACGAP1, GPR35, GPR55, LPAR2, F2RL1, P2RY10B, CELSR1, GPR18	838	123	20051	2.33436	1	0.128408	0.117382
GOTERM_MF_FAT	GO:0032813~tumor necrosis factor receptor superfamily binding	7	0.682927	0.0140728	CD40LG, TNFSF14, LTA, TNFSF11, TNFSF8, TRAF1, TNF	738	49	18102	3.50407	1	0.320271	0.311775
GOTERM_MF_FAT	GO:0042803~protein homodimerization activity	47	4.58537	0.0141365	TOP2A, ACHE, TRIM30B, BLM, TENM3, TRIM30C, H2-M2, CGAS, H2-Q2, NLRC4, CST7, DNPH1, IKZF3, GIMAP7, MTHFD1L, KYNU, ENPP1, BCL2A1A, ECT2, BCL2A1B, RAB11FIP4, TBX1, NTRK1, BARD1, TFAP2B, CR2, RRM2, GCH1, MIGA1, BCL11A, TESC, CIP2A, FOXP3, KNSTRN, ADRA2A, RUNX1, GREM1, CD4, CENPF, NR4A3, JAML, HOOK1, BIRC5, PADI2, KIF20B, ABCG3, ACPP	738	810	18102	1.42326	1	0.320271	0.311775
GOTERM_MF_FAT	GO:0045028~G-protein coupled purinergic nucleotide receptor activity	4	0.390244	0.0141587	P2RY10, P2RY14, GPR171, P2RY10B	738	13	18102	7.54722	1	0.320271	0.311775
GOTERM_MF_FAT	GO:0023026~MHC class II protein complex binding	4	0.390244	0.0141587	H2-EB2, CD4, H2-OB, H2-OA	738	13	18102	7.54722	1	0.320271	0.311775
GOTERM_MF_FAT	GO:0001608~G-protein coupled nucleotide receptor activity	4	0.390244	0.0141587	P2RY10, P2RY14, GPR171, P2RY10B	738	13	18102	7.54722	1	0.320271	0.311775
GOTERM_CC_FAT	GO:0005887~integral component of plasma membrane	98	9.56098	0.0143224	AQP9, ITGA2B, AQP5, SLC28A2B, AQP3, NCMAP, TNF, GPR174, IL18RAP, KLRB1C, ENPP1, IL12A, PLXNC1, GGT1, SLC16A3, SLC39A4, SLC16A5, RNF43, MIGA1, CLDN4, ADAM8, RTN4R, GPR88, LPAR2, P2RY10B, CACNA1E, CACNA1H, TRPM2, CACNA1I, VMN2R97, ADGRG5, CD19, BTLA, SLAMF6, KLRC1, KCNN4, ICOS, CLCA3A1, CLCA3A2, TSPAN1, PROM2, ST14, IFNLR1, ITGB2L, SELL, KLRD1, ULBP1, GPR18, LAT, CD22, CD40, TENM3, FLT3, STAB2, MS4…	743	1761	16713	1.25179	0.999948	0.18484	0.175112
GOTERM_BP_FAT	GO:0032620~interleukin-17 production	7	0.682927	0.0143228	ARG2, OSM, SLAMF6, IL12A, NOD2, IL12RB1, FOXP3	838	48	20051	3.48938	1	0.131498	0.120208
GOTERM_BP_FAT	GO:0061098~positive regulation of protein tyrosine kinase activity	7	0.682927	0.0143228	GREM1, ERBB3, ABI3, STAP1, TGFA, LRP8, ADRA2A	838	48	20051	3.48938	1	0.131498	0.120208
GOTERM_BP_FAT	GO:0002548~monocyte chemotaxis	8	0.780488	0.0144264	GM10591, GREM1, CX3CR1, CCL22, SLAMF8, TNFSF11, CTSG, CCL17	838	62	20051	3.08738	1	0.131898	0.120573
GOTERM_BP_FAT	GO:0035825~reciprocal DNA recombination	8	0.780488	0.0144264	RAD51AP1, TOP2A, BARD1, RAD51, RBBP8, TRIP13, BRCA1, CENPS	838	62	20051	3.08738	1	0.131898	0.120573
GOTERM_BP_FAT	GO:0043300~regulation of leukocyte degranulation	8	0.780488	0.0144264	BLK, FGR, ITGB2L, CD160, F2RL1, KLRC1, IL13RA2, UNC13D	838	62	20051	3.08738	1	0.131898	0.120573
GOTERM_BP_FAT	GO:0035023~regulation of Rho protein signal transduction	10	0.97561	0.0145943	RTN4R, GPR174, RIPOR2, P2RY10, GPR35, GPR55, LPAR2, F2RL1, P2RY10B, GPR18	838	92	20051	2.60078	1	0.133248	0.121807
GOTERM_BP_FAT	GO:0002763~positive regulation of myeloid leukocyte differentiation	9	0.878049	0.0148278	CD4, GPR68, TESC, LEF1, TNFSF11, EVI2, TNF, CD101, RUNX1	838	77	20051	2.79669	1	0.135193	0.123585
GOTERM_BP_FAT	GO:0007043~cell-cell junction assembly	13	1.26829	0.0151453	ILDR1, TNF, CLDN11, CLDN4, CLDN3, MARVELD2, POF1B, CDH1, IL1B, CLDN8, CLDN7, PKP3, ECT2	838	141	20051	2.20605	1	0.136969	0.125209
GOTERM_BP_FAT	GO:0090235~regulation of metaphase plate congression	4	0.390244	0.0151473	SPAG5, CDCA8, BIRC5, AURKB	838	13	20051	7.36222	1	0.136969	0.125209
GOTERM_BP_FAT	GO:0002223~stimulatory C-type lectin receptor signaling pathway	4	0.390244	0.0151473	KLRK1, KLRD1, KLRC1, KLRI1	838	13	20051	7.36222	1	0.136969	0.125209
GOTERM_BP_FAT	GO:0030854~positive regulation of granulocyte differentiation	4	0.390244	0.0151473	TESC, LEF1, EVI2, RUNX1	838	13	20051	7.36222	1	0.136969	0.125209
GOTERM_BP_FAT	GO:0048304~positive regulation of isotype switching to IgG isotypes	4	0.390244	0.0151473	CD40, ATAD5, TBX21, CD28	838	13	20051	7.36222	1	0.136969	0.125209
GOTERM_BP_FAT	GO:0032754~positive regulation of interleukin-5 production	4	0.390244	0.0151473	IL1RAP, GATA3, PRKCZ, IL17RB	838	13	20051	7.36222	1	0.136969	0.125209
GOTERM_BP_FAT	GO:1903707~negative regulation of hemopoiesis	15	1.46341	0.0151842	PGLYRP2, CDKN2A, GPR68, FLT3, GPR55, DTX1, RUNX3, FOXP3, RUNX1, TBX21, MYB, GPR171, CTLA4, CLEC2I, NFKBID	838	175	20051	2.0509	1	0.137115	0.125342
GOTERM_BP_FAT	GO:0050921~positive regulation of chemotaxis	14	1.36585	0.0152678	CX3CR1, RIPOR2, TNFSF14, ITGA2, TIAM1, SELL, IL1B, CXCR2, F2RL1, CCR7, IL12A, CCR6, CCR4, SLAMF1	838	158	20051	2.12013	1	0.137682	0.12586
GOTERM_BP_FAT	GO:0002686~negative regulation of leukocyte migration	7	0.682927	0.0157619	GREM1, RIPOR2, SLAMF8, PADI2, STAP1, GCSAM, GPR18	838	49	20051	3.41817	1	0.14175	0.129579
GOTERM_BP_FAT	GO:0043029~T cell homeostasis	7	0.682927	0.0157619	GPR174, CCNB2, SIT1, PMAIP1, IL7R, TNFRSF4, CHST3	838	49	20051	3.41817	1	0.14175	0.129579
KEGG_PATHWAY	mmu04662:B cell receptor signaling pathway	9	0.878049	0.0158344	LILRA6, CR2, CD72, PIRA13, CD19, PIRA12, BLNK, CARD11, CD22	363	81	8998	2.75421	0.987188	0.127607	0.115498
GOTERM_BP_FAT	GO:0046578~regulation of Ras protein signal transduction	17	1.65854	0.0158489	NTRK1, RTN4R, RIPOR2, P2RY10, GPR35, GPR55, LPAR2, RASAL1, P2RY10B, RASAL3, FOXM1, RASGRP1, GPR174, PSD4, F2RL1, GPR18, RALGPS2	838	211	20051	1.92778	1	0.142338	0.130116
GOTERM_CC_FAT	GO:0016323~basolateral plasma membrane	23	2.2439	0.0158658	DSP, ST14, DTNB, AQP9, TACSTD2, KCNJ16, TGFA, NOD2, AQP5, AQP3, CLDN4, ERBB3, MARVELD2, CDH1, EPCAM, CLDN8, CLDN7, MAP7, ENPP1, KCNN4, SLC16A3, ATP6V1B1, PROM2	743	302	16713	1.71311	0.999982	0.200967	0.19039
GOTERM_BP_FAT	GO:0080135~regulation of cellular response to stress	49	4.78049	0.0158867	IL1RN, CGAS, PTPN22, BRCA1, FZD10, SLC7A11, FOXM1, TNF, PBK, TNFSF11, CCR7, MAP3K9, UNC5CL, ARG2, RMI2, DDX11, TRAF1, IL1A, TIAM1, NAIP6, IL1B, TLR6, TNIK, RTN4R, RNASEH2B, BLM, DERL3, NOD2, RASGRP1, RAD51AP1, TRPM2, CRACR2A, FIGNL1, RBBP8, PMAIP1, SLAMF1, BARD1, ATAD5, GCH1, CDKN2A, PYCR1, SCIMP, DHFR, RAD51, CD40LG, NR4A3, ABI3, CD27, F2RL1	838	835	20051	1.40411	1	0.142483	0.130249
GOTERM_BP_FAT	GO:0002678~positive regulation of chronic inflammatory response	3	0.292683	0.0160002	LTA, TNF, IDO1	838	5	20051	14.3563	1	0.142725	0.13047
GOTERM_BP_FAT	GO:0007057~spindle assembly involved in female meiosis I	3	0.292683	0.0160002	CENPE, CCNB2, NDC80	838	5	20051	14.3563	1	0.142725	0.13047
GOTERM_BP_FAT	GO:0019677~NAD catabolic process	3	0.292683	0.0160002	ART2A, ART2B, NUDT17	838	5	20051	14.3563	1	0.142725	0.13047
GOTERM_BP_FAT	GO:0019441~tryptophan catabolic process to kynurenine	3	0.292683	0.0160002	KYNU, AFMID, IDO1	838	5	20051	14.3563	1	0.142725	0.13047
GOTERM_BP_FAT	GO:0044786~cell cycle DNA replication	6	0.585366	0.0161453	DBF4, ATAD5, GINS3, CDC7, DNA2, E2F8	838	36	20051	3.98787	1	0.143824	0.131475
GOTERM_BP_FAT	GO:0090231~regulation of spindle checkpoint	5	0.487805	0.0164524	CCNB1, CDCA8, BIRC5, AURKB, NDC80	838	24	20051	4.98483	1	0.145772	0.133256
GOTERM_BP_FAT	GO:0043369~CD4-positive or CD8-positive, alpha-beta T cell lineage commitment	5	0.487805	0.0164524	TBX21, SLAMF6, TOX, FOXP3, BATF	838	24	20051	4.98483	1	0.145772	0.133256
GOTERM_BP_FAT	GO:0072525~pyridine-containing compound biosynthetic process	5	0.487805	0.0164524	KYNU, HAAO, AFMID, QPRT, IDO1	838	24	20051	4.98483	1	0.145772	0.133256
GOTERM_BP_FAT	GO:0045063~T-helper 1 cell differentiation	5	0.487805	0.0164524	CRACR2A, TBX21, LEF1, CCR7, IL18R1	838	24	20051	4.98483	1	0.145772	0.133256
GOTERM_BP_FAT	GO:0032102~negative regulation of response to external stimulus	25	2.43902	0.0166221	RTN4R, CX3CR1, SEMA3D, NLRC3, NOD2, GATA3, MEFV, TNF, NT5E, CNR2, PBK, SLAMF8, STAP1, WNT4, HAVCR2, ARG2, IL1R2, FGG, SEMA4F, FOXP3, GREM1, CLDN3, PADI2, HAMP, GPR18	838	360	20051	1.66161	1	0.147078	0.13445
GOTERM_BP_FAT	GO:0007249~I-kappaB kinase/NF-kappaB signaling	18	1.7561	0.0171946	CX3CR1, UNC5CL, CD40, TRIM30B, TRIM30C, RHOH, NLRC3, NOD2, TNF, IL1A, CD4, IL1B, F2RL1, TNFSF11, TRIM59, TLR6, NFKBID, CARD11	838	231	20051	1.86446	1	0.151939	0.138894
GOTERM_BP_FAT	GO:0043405~regulation of MAP kinase activity	21	2.04878	0.0172747	DUSP2, CD40, IL1RN, RGS14, TGFA, PTPN22, NOD2, FZD10, TNF, LAX1, RASGRP1, ADRA2A, TIAM1, CD40LG, IL1B, TNFSF11, CCR7, ADAM8, MAP3K9, TLR6, TNIK	838	286	20051	1.75689	1	0.152443	0.139354
GOTERM_MF_FAT	GO:0035639~purine ribonucleoside triphosphate binding	96	9.36585	0.0176829	TOP2A, ITK, ERCC6L, FLT3, RASEF, CGAS, KIF11, MKI67, GIMAP7, KIF15, RAB43, RAB44, ARL5C, PBK, ENPP1, NEK2, MAP3K9, TK1, STK32C, 9930111J21RIK1, HELLS, GBP8, DDX11, RIPK4, MATK, RHOH, KIF23, KIF22, HASPIN, RUNX3, RUNX2, KIF4, RUNX1, FGR, ZAP70, MELK, KIFC1, NAIP6, RRAGB, LCK, RAB37, OAS3, KIF2C, ACSBG1, TNIK, KIF20A, RAB39, DNA2, KIF20B, ABCG3, CDKL1, ATP6V1B1, BLK, PIF1, BLM, TXK, NLRC3, NLRC4, N…	738	1892	18102	1.24457	1	0.386075	0.375834
GOTERM_BP_FAT	GO:0032755~positive regulation of interleukin-6 production	11	1.07317	0.0177157	IL1A, IL1B, IL36G, F2RL1, NOD2, IL1RAP, TLR6, POU2F2, SCIMP, TNF, MAPK13	838	111	20051	2.37116	1	0.155988	0.142595
GOTERM_BP_FAT	GO:0071216~cellular response to biotic stimulus	25	2.43902	0.0177238	CX3CR1, CD40, CEBPE, CD80, GFI1, PTPN22, NOD2, TNF, NUGGC, CXCL15, KLRK1, STAP1, IL12A, CTSG, HAVCR2, CR2, GCH1, IL36G, PDCD1LG2, SCIMP, AICDA, IL1A, CD6, IL1B, TLR6	838	362	20051	1.65243	1	0.155988	0.142595
GOTERM_MF_FAT	GO:0004713~protein tyrosine kinase activity	13	1.26829	0.0179289	NTRK1, BLK, ITK, FLT3, TXK, MATK, SLA, FGR, ZAP70, MELK, ERBB3, LCK, PBK	738	148	18102	2.15453	1	0.386075	0.375834
GOTERM_BP_FAT	GO:0090022~regulation of neutrophil chemotaxis	6	0.585366	0.0180443	RIPOR2, SELL, IL1B, CXCR2, CCR7, NOD2	838	37	20051	3.88009	1	0.158021	0.144453
GOTERM_BP_FAT	GO:2000515~negative regulation of CD4-positive, alpha-beta T cell activation	6	0.585366	0.0180443	ARG2, TBX21, TARM1, FOXP3, RUNX3, RUNX1	838	37	20051	3.88009	1	0.158021	0.144453
GOTERM_BP_FAT	GO:0045066~regulatory T cell differentiation	6	0.585366	0.0180443	CARMIL2, FUT7, CD28, CTLA4, TOX, FOXP3	838	37	20051	3.88009	1	0.158021	0.144453
GOTERM_BP_FAT	GO:0060627~regulation of vesicle-mediated transport	39	3.80488	0.0180507	SIRPB1B, BLK, SIRPB1A, PGAP1, NOD2, TNF, SIGLECF, CACNA1H, CACNA1I, RAB25, STAP1, CCR7, KLRC1, GM9733, CD300LF, IL13RA2, SLAMF1, PROM2, PACSIN1, GM5150, CD160, ITGA2, FGG, SYT13, ADRA2A, UNC13D, BAIAP3, GREM1, FGR, SLC4A8, ITGB2L, DNAJC6, IL1B, F2RL1, PTX3, HAP1, HAMP, CD22, SIRPB1C	838	638	20051	1.46263	1	0.158021	0.144453
GOTERM_MF_FAT	GO:0004714~transmembrane receptor protein tyrosine kinase activity	12	1.17073	0.0180919	NTRK1, BLK, FGR, ITK, ZAP70, MELK, ERBB3, LCK, FLT3, TXK, PBK, MATK	738	131	18102	2.24688	1	0.386075	0.375834
GOTERM_CC_FAT	GO:1990752~microtubule end	6	0.585366	0.0183094	ASPM, KIF18B, SPAG5, KIF2C, SLAIN1, KNSTRN	743	35	16713	3.8561	0.999997	0.227702	0.215717
GOTERM_BP_FAT	GO:0006586~indolalkylamine metabolic process	4	0.390244	0.0186899	KYNU, HAAO, AFMID, IDO1	838	14	20051	6.83635	1	0.161898	0.147997
GOTERM_BP_FAT	GO:0045060~negative thymic T cell selection	4	0.390244	0.0186899	ZAP70, CD28, CCR7, CD3E	838	14	20051	6.83635	1	0.161898	0.147997
GOTERM_BP_FAT	GO:0048291~isotype switching to IgG isotypes	4	0.390244	0.0186899	CD40, ATAD5, TBX21, CD28	838	14	20051	6.83635	1	0.161898	0.147997
GOTERM_BP_FAT	GO:0042362~fat-soluble vitamin biosynthetic process	4	0.390244	0.0186899	VDR, IL1B, GFI1, TNF	838	14	20051	6.83635	1	0.161898	0.147997
GOTERM_BP_FAT	GO:0032817~regulation of natural killer cell proliferation	4	0.390244	0.0186899	CD244A, PTPN22, IL12A, IL12RB1	838	14	20051	6.83635	1	0.161898	0.147997
GOTERM_BP_FAT	GO:0007144~female meiosis I	4	0.390244	0.0186899	CENPE, CCNB2, TRIP13, NDC80	838	14	20051	6.83635	1	0.161898	0.147997
GOTERM_BP_FAT	GO:0006568~tryptophan metabolic process	4	0.390244	0.0186899	KYNU, HAAO, AFMID, IDO1	838	14	20051	6.83635	1	0.161898	0.147997
GOTERM_BP_FAT	GO:0002664~regulation of T cell tolerance induction	4	0.390244	0.0186899	CD3E, FOXP3, RUNX1, IDO1	838	14	20051	6.83635	1	0.161898	0.147997
GOTERM_BP_FAT	GO:2000001~regulation of DNA damage checkpoint	5	0.487805	0.0189546	BARD1, RNASEH2B, RAD51, PBK, BRCA1	838	25	20051	4.78544	1	0.16376	0.149699
GOTERM_BP_FAT	GO:0016338~calcium-independent cell-cell adhesion via plasma membrane cell-adhesion molecules	5	0.487805	0.0189546	CLDN11, CLDN4, CLDN3, CLDN8, CLDN7	838	25	20051	4.78544	1	0.16376	0.149699
KEGG_PATHWAY	mmu05143:African trypanosomiasis	6	0.585366	0.0191762	IL1B, F2RL1, IL12A, TNF, PLCB2, IDO1	363	39	8998	3.81352	0.994938	0.150123	0.135877
GOTERM_BP_FAT	GO:0051054~positive regulation of DNA metabolic process	24	2.34146	0.0199013	TOP2A, BLM, CD40, ATAD5, GINS3, DDX11, CDC7, BRCA1, FOXM1, TNF, AURKB, RAD51AP1, GREM1, PKIB, RAD51, DBF4, TBX21, CD28, CDK1, RBBP8, NEK2, DNA2, TOX, E2F8	838	347	20051	1.65491	1	0.171713	0.15697
GOTERM_MF_FAT	GO:0061135~endopeptidase regulator activity	18	1.7561	0.0200292	TNFSF14, SERPINA10, NLRC4, SERPINA1E, CST7, SERPINA3H, STFA2L1, WFDC2, SERPINB5, SERPINA1B, SERPINA3F, SPINT1, NAIP6, CD27, BIRC5, WFDC18, SERPINI1, CSTDC4	738	241	18102	1.832	1	0.419501	0.408374
GOTERM_CC_FAT	GO:0045121~membrane raft	30	2.92683	0.02007	RTN4R, LY6K, KCNA3, PRKCZ, LRP8, TNF, MS4A4C, MS4A4B, CACNA1H, CDH1, CD19, PRSS8, KCNN4, PROM2, VDR, L1CAM, ZAP70, CD4, ITGB2L, ARC, RRAGB, CD8A, LCK, CD28, TLR6, TNFRSF26, ABCG3, MS4A1, SKAP1, CARD11	743	437	16713	1.54421	0.999999	0.245141	0.232239
GOTERM_BP_FAT	GO:0033198~response to ATP	6	0.585366	0.020085	PANX1, NT5E, SELL, IL1B, ENPP1, DNTT	838	38	20051	3.77798	1	0.173072	0.158212
GOTERM_BP_FAT	GO:0006974~cellular response to DNA damage stimulus	50	4.87805	0.0201892	TOP2A, TONSL, CGAS, MCM10, BRCA1, FOXM1, TNF, CHAF1B, CHAF1A, PCLAF, PBK, CTLA4, BCL2A1A, BCL2A1B, POLE, WDHD1, RMI2, DDX11, DNTT, KIF22, MMS22L, NEIL3, DNA2, BLK, PIF1, RNASEH2B, BLM, UHRF1, CDCA5, NUGGC, UNG, RAD51AP1, FIGNL1, RBBP8, PMAIP1, CLSPN, BARD1, MBD4, ATAD5, CDKN2A, PLK1, FANCA, CDC7, BATF, RAD51, POLE2, CDK1, TRIP13, CENPS, CDKN3	838	870	20051	1.37513	1	0.173743	0.158825
GOTERM_CC_FAT	GO:0031234~extrinsic component of cytoplasmic side of plasma membrane	11	1.07317	0.0205238	BLK, FGR, GNA14, TIAM1, ZAP70, CNR2, RACGAP1, LCK, RGS1, STAC2, SLA	743	107	16713	2.31246	0.999999	0.246286	0.233323
GOTERM_BP_FAT	GO:0045429~positive regulation of nitric oxide biosynthetic process	7	0.682927	0.0206721	ITGB2L, KLRK1, IL1B, PTX3, TLR6, ULBP1, TNF	838	52	20051	3.22097	1	0.177667	0.162412
GOTERM_CC_FAT	GO:0098857~membrane microdomain	30	2.92683	0.0212486	RTN4R, LY6K, KCNA3, PRKCZ, LRP8, TNF, MS4A4C, MS4A4B, CACNA1H, CDH1, CD19, PRSS8, KCNN4, PROM2, VDR, L1CAM, ZAP70, CD4, ITGB2L, ARC, RRAGB, CD8A, LCK, CD28, TLR6, TNFRSF26, ABCG3, MS4A1, SKAP1, CARD11	743	438	16713	1.54068	1	0.248987	0.235882
GOTERM_CC_FAT	GO:0019897~extrinsic component of plasma membrane	16	1.56098	0.0214769	BLK, ST14, ART2B, SLA, FGR, ZAP70, GNA14, TIAM1, FCNB, CNR2, RACGAP1, CDH1, LCK, RGS1, STAC2, PRSS8	743	189	16713	1.90425	1	0.248987	0.235882
GOTERM_BP_FAT	GO:0043068~positive regulation of programmed cell death	41	4	0.0218206	FOXA1, TOP2A, BLK, CD40, NLRC4, PRDM11, TNF, KLRK1, CXCR2, PMAIP1, TNFRSF8, CTLA4, MYBL2, IL12A, MAP3K9, PLEKHN1, ECT2, BUB1, BCL2L14, NTRK1, BARD1, TFAP2B, VDR, CD160, CDKN2A, DKKL1, OSM, RUNX3, NR4A3, CD40LG, MELK, LCK, IL1B, LTA, ADAM8, PDCD1, TNFRSF26, NFKBID, RNF122, CDK5R1, IDO1	838	688	20051	1.42589	1	0.187293	0.171212
[truncated: 457 more rows]
