# Supplementary material for: Mechanic Insight into the Distinct and Common Roles of Ovariectomy Versus Adrenalectomy on Adipose Tissue Remodeling in Female Mice
Source: Int J Mol Sci. 2023 Jan 24;24(3):2308. doi: 10.3390/ijms24032308 (PMC9916485; doi:10.3390/ijms24032308)
Supplement: Supplementary file 1 [file ijms-24-02308-s001.zip › Table S7 Functional enrichment analysis of the distinct DEGs induced by OVX or ADX using DAVID.xlsx]

## Sheet: OV vs CVdeg ∩ AV vs CVnondeg
	Category	Term	Count	%	PValue	Genes	List Total	Pop Hits	Pop Total	Fold Enrichment	Bonferroni	Benjamini	FDR
up regulated	GOTERM_BP_FAT	GO:0036293~response to decreased oxygen levels	8	13.3333	3.29366e-05	POSTN, LEP, SLC1A1, CXCR4, PPARG, VLDLR, CPEB2, HK2	49	383	20051	8.54734	0.0721629	0.071848	0.0705836
	GOTERM_BP_FAT	GO:0009628~response to abiotic stimulus	13	21.6667	6.7542e-05	POSTN, SLC1A1, CXCR4, OTOP1, VLDLR, HK2, DNAJA1, TCIM, LEP, LRRC8C, PPARG, SLC38A3, CPEB2	49	1368	20051	3.88864	0.142381	0.071848	0.0705836
	GOTERM_BP_FAT	GO:0070482~response to oxygen levels	8	13.3333	9.4828e-05	POSTN, LEP, SLC1A1, CXCR4, PPARG, VLDLR, CPEB2, HK2	49	453	20051	7.22656	0.193982	0.071848	0.0705836
	GOTERM_BP_FAT	GO:0001666~response to hypoxia	7	11.6667	0.000168392	POSTN, LEP, CXCR4, PPARG, VLDLR, CPEB2, HK2	49	346	20051	8.2787	0.318156	0.0850149	0.0835188
	GOTERM_BP_FAT	GO:0048514~blood vessel morphogenesis	9	15	0.00018701	EMCN, PLK2, LEP, SLC1A1, APLNR, CXCR4, PPARG, HK2, APLN	49	678	20051	5.43191	0.346427	0.0850149	0.0835188
	GOTERM_BP_FAT	GO:0016310~phosphorylation	16	26.6667	0.000309304	PANK3, DYNLT1B, PLK2, HFE, SLC1A1, CXCR4, VLDLR, HK2, APLN, DNAJA1, TCIM, CCNG2, LEP, APLNR, PPARG, ITGA6	49	2389	20051	2.74059	0.505133	0.0947262	0.0930592
	GOTERM_BP_FAT	GO:0001525~angiogenesis	8	13.3333	0.000379106	EMCN, PLK2, LEP, APLNR, CXCR4, PPARG, HK2, APLN	49	568	20051	5.76344	0.577789	0.0947262	0.0930592
	GOTERM_BP_FAT	GO:0009719~response to endogenous stimulus	14	23.3333	0.000392367	POSTN, HFE, SLC1A1, CXCR4, ABCC9, NREP, OTOP1, APLN, DNAJA1, SERPINA1A, MAT2A, LEP, PPARG, CPEB2	49	1903	20051	3.01043	0.590335	0.0947262	0.0930592
	GOTERM_BP_FAT	GO:0010646~regulation of cell communication	20	33.3333	0.000459314	POSTN, DYNLT1B, CLSTN2, PLK2, HFE, SLC1A1, CXCR4, NREP, OTOP1, SEZ6L2, APLN, DNAJA1, RGS5, TCIM, SYT12, LEP, APLNR, PPARG, ITGA6, SOX7	49	3671	20051	2.22939	0.648209	0.0947262	0.0930592
	GOTERM_BP_FAT	GO:0001568~blood vessel development	9	15	0.000476101	EMCN, PLK2, LEP, SLC1A1, APLNR, CXCR4, PPARG, HK2, APLN	49	779	20051	4.72765	0.661392	0.0947262	0.0930592
	GOTERM_BP_FAT	GO:0042325~regulation of phosphorylation	13	21.6667	0.000498409	DYNLT1B, HFE, SLC1A1, CXCR4, VLDLR, APLN, DNAJA1, TCIM, CCNG2, LEP, APLNR, PPARG, ITGA6	49	1693	20051	3.14215	0.678149	0.0947262	0.0930592
	GOTERM_BP_FAT	GO:0023051~regulation of signaling	20	33.3333	0.000500094	POSTN, DYNLT1B, CLSTN2, PLK2, HFE, SLC1A1, CXCR4, NREP, OTOP1, SEZ6L2, APLN, DNAJA1, RGS5, TCIM, SYT12, LEP, APLNR, PPARG, ITGA6, SOX7	49	3695	20051	2.21491	0.67938	0.0947262	0.0930592
	GOTERM_BP_FAT	GO:0031668~cellular response to extracellular stimulus	6	10	0.000545726	POSTN, HFE, LEP, ITGA6, PPARG, SLC38A3	49	281	20051	8.73745	0.710997	0.095418	0.0937389
	GOTERM_BP_FAT	GO:0072358~cardiovascular system development	9	15	0.000689369	EMCN, PLK2, LEP, SLC1A1, APLNR, CXCR4, PPARG, HK2, APLN	49	824	20051	4.46946	0.791573	0.100747	0.0989738
	GOTERM_BP_FAT	GO:0001944~vasculature development	9	15	0.000689369	EMCN, PLK2, LEP, SLC1A1, APLNR, CXCR4, PPARG, HK2, APLN	49	824	20051	4.46946	0.791573	0.100747	0.0989738
	GOTERM_BP_FAT	GO:0048646~anatomical structure formation involved in morphogenesis	11	18.3333	0.000735751	OLFM1, EMCN, PLK2, LEP, SLC1A1, APLNR, CXCR4, PPARG, SOX7, HK2, APLN	49	1274	20051	3.53316	0.812451	0.100747	0.0989738
	GOTERM_BP_FAT	GO:0032268~regulation of cellular protein metabolic process	17	28.3333	0.000753495	DYNLT1B, PLK2, HFE, SLC1A1, CXCR4, VLDLR, DNAJA1, SERPINA1A, TCIM, CCNG2, LEP, SERPINA3B, PRR16, APLNR, PPARG, CPEB2, SOX7	49	2887	20051	2.40958	0.819873	0.100747	0.0989738
	GOTERM_BP_FAT	GO:0007399~nervous system development	16	26.6667	0.00100316	POSTN, DYNLT1B, CLSTN2, PLK2, NCAN, SLC1A1, CXCR4, NREP, VLDLR, SEZ6L2, OLFM1, LEP, PPARG, ITGA6, SLC38A3, TNFRSF21	49	2666	20051	2.45584	0.897953	0.126676	0.124447
	GOTERM_BP_FAT	GO:0051240~positive regulation of multicellular organismal process	14	23.3333	0.00113235	POSTN, DYNLT1B, CLSTN2, PLK2, SLC1A1, CXCR4, VLDLR, HK2, APLN, OLFM1, LEP, APLNR, PPARG, ITGA6	49	2127	20051	2.6934	0.923954	0.129691	0.127409
	GOTERM_BP_FAT	GO:0019220~regulation of phosphate metabolic process	13	21.6667	0.00121885	DYNLT1B, HFE, SLC1A1, CXCR4, VLDLR, APLN, DNAJA1, TCIM, CCNG2, LEP, APLNR, PPARG, ITGA6	49	1872	20051	2.8417	0.937548	0.129691	0.127409
	GOTERM_BP_FAT	GO:0051174~regulation of phosphorus metabolic process	13	21.6667	0.00124753	DYNLT1B, HFE, SLC1A1, CXCR4, VLDLR, APLN, DNAJA1, TCIM, CCNG2, LEP, APLNR, PPARG, ITGA6	49	1877	20051	2.83413	0.941496	0.129691	0.127409
	GOTERM_BP_FAT	GO:0045765~regulation of angiogenesis	6	10	0.00131566	PLK2, LEP, APLNR, CXCR4, PPARG, HK2	49	342	20051	7.17902	0.949902	0.129691	0.127409
	GOTERM_BP_FAT	GO:0065009~regulation of molecular function	16	26.6667	0.00131816	DYNLT1B, PLK2, HFE, SLC1A1, ABCC9, VLDLR, DNAJA1, SERPINA1A, TCIM, CCNG2, LEP, SERPINA3B, PPARG, ITGA6, CPEB2, SOX7	49	2737	20051	2.39213	0.950187	0.129691	0.127409
	GOTERM_BP_FAT	GO:0051960~regulation of nervous system development	10	16.6667	0.00136937	OLFM1, DYNLT1B, CLSTN2, PLK2, CXCR4, ITGA6, PPARG, VLDLR, NREP, TNFRSF21	49	1142	20051	3.58322	0.95567	0.129691	0.127409
	GOTERM_BP_FAT	GO:0042327~positive regulation of phosphorylation	10	16.6667	0.00148168	TCIM, HFE, LEP, SLC1A1, APLNR, CXCR4, ITGA6, PPARG, VLDLR, APLN	49	1155	20051	3.54289	0.965674	0.133908	0.131551
	GOTERM_BP_FAT	GO:0051246~regulation of protein metabolic process	17	28.3333	0.00153172	DYNLT1B, PLK2, HFE, SLC1A1, CXCR4, VLDLR, DNAJA1, SERPINA1A, TCIM, CCNG2, LEP, SERPINA3B, PRR16, APLNR, PPARG, CPEB2, SOX7	49	3080	20051	2.25859	0.969371	0.133908	0.131551
	GOTERM_BP_FAT	GO:0060284~regulation of cell development	10	16.6667	0.00167881	OLFM1, POSTN, DYNLT1B, PLK2, CXCR4, ITGA6, PPARG, VLDLR, NREP, TNFRSF21	49	1176	20051	3.47963	0.97809	0.137505	0.135086
	GOTERM_BP_FAT	GO:0008015~blood circulation	7	11.6667	0.00180995	POSTN, LEP, SLC1A1, CXCR4, ABCC9, PPARG, APLN	49	544	20051	5.26549	0.983748	0.137505	0.135086
	GOTERM_BP_FAT	GO:0034097~response to cytokine	10	16.6667	0.00184281	SERPINA1A, POSTN, MAT2A, LEP, SLC1A1, CXCR4, PPARG, OTOP1, TNFRSF21, HK2	49	1192	20051	3.43292	0.984921	0.137505	0.135086
	GOTERM_BP_FAT	GO:0003013~circulatory system process	7	11.6667	0.00202027	POSTN, LEP, SLC1A1, CXCR4, ABCC9, PPARG, APLN	49	556	20051	5.15185	0.989935	0.137505	0.135086
	GOTERM_BP_FAT	GO:0010648~negative regulation of cell communication	11	18.3333	0.00203796	DNAJA1, RGS5, DYNLT1B, TCIM, PLK2, LEP, APLNR, ITGA6, PPARG, OTOP1, APLN	49	1457	20051	3.08939	0.990333	0.137505	0.135086
	GOTERM_BP_FAT	GO:1901342~regulation of vasculature development	6	10	0.00206464	PLK2, LEP, APLNR, CXCR4, PPARG, HK2	49	379	20051	6.47816	0.990903	0.137505	0.135086
	GOTERM_BP_FAT	GO:0023057~negative regulation of signaling	11	18.3333	0.00207979	DNAJA1, RGS5, DYNLT1B, TCIM, PLK2, LEP, APLNR, ITGA6, PPARG, OTOP1, APLN	49	1461	20051	3.08093	0.991212	0.137505	0.135086
	GOTERM_BP_FAT	GO:0071496~cellular response to external stimulus	6	10	0.00211246	POSTN, HFE, LEP, ITGA6, PPARG, SLC38A3	49	381	20051	6.44416	0.991842	0.137505	0.135086
	GOTERM_BP_FAT	GO:0050790~regulation of catalytic activity	13	21.6667	0.00211733	DYNLT1B, SLC1A1, VLDLR, DNAJA1, SERPINA1A, TCIM, CCNG2, LEP, SERPINA3B, PPARG, ITGA6, CPEB2, SOX7	49	1996	20051	2.66516	0.991932	0.137505	0.135086
	GOTERM_BP_FAT	GO:0071295~cellular response to vitamin	3	5	0.00218626	POSTN, LEP, PPARG	49	29	20051	42.3315	0.993105	0.138038	0.135609
	GOTERM_BP_FAT	GO:0008217~regulation of blood pressure	5	8.33333	0.00228043	POSTN, LEP, ABCC9, PPARG, APLN	49	232	20051	8.81905	0.994437	0.140093	0.137627
	GOTERM_BP_FAT	GO:0010562~positive regulation of phosphorus metabolic process	10	16.6667	0.00263307	TCIM, HFE, LEP, SLC1A1, APLNR, CXCR4, ITGA6, PPARG, VLDLR, APLN	49	1256	20051	3.25799	0.99751	0.14798	0.145376
	GOTERM_BP_FAT	GO:0045937~positive regulation of phosphate metabolic process	10	16.6667	0.00263307	TCIM, HFE, LEP, SLC1A1, APLNR, CXCR4, ITGA6, PPARG, VLDLR, APLN	49	1256	20051	3.25799	0.99751	0.14798	0.145376
	GOTERM_BP_FAT	GO:0048585~negative regulation of response to stimulus	12	20	0.00266827	DNAJA1, RGS5, DYNLT1B, TCIM, HFE, PLK2, LEP, APLNR, ITGA6, PPARG, OTOP1, APLN	49	1776	20051	2.76489	0.997702	0.14798	0.145376
	GOTERM_BP_FAT	GO:0050767~regulation of neurogenesis	9	15	0.00266924	OLFM1, DYNLT1B, PLK2, CXCR4, ITGA6, PPARG, VLDLR, NREP, TNFRSF21	49	1019	20051	3.61417	0.997707	0.14798	0.145376
	GOTERM_BP_FAT	GO:0031669~cellular response to nutrient levels	5	8.33333	0.00273591	POSTN, HFE, LEP, PPARG, SLC38A3	49	244	20051	8.38533	0.998031	0.148065	0.145459
	GOTERM_BP_FAT	GO:1904706~negative regulation of vascular smooth muscle cell proliferation	3	5	0.00282593	RGS5, PPARG, APLN	49	33	20051	37.2004	0.998396	0.14938	0.146751
	GOTERM_BP_FAT	GO:0072359~circulatory system development	10	16.6667	0.00289837	OLFM1, EMCN, PLK2, LEP, SLC1A1, APLNR, CXCR4, PPARG, HK2, APLN	49	1274	20051	3.21196	0.99864	0.149727	0.147092
	GOTERM_BP_FAT	GO:0001932~regulation of protein phosphorylation	11	18.3333	0.00314787	DNAJA1, DYNLT1B, TCIM, HFE, CCNG2, LEP, SLC1A1, APLNR, CXCR4, PPARG, VLDLR	49	1546	20051	2.91154	0.99923	0.159003	0.156204
	GOTERM_BP_FAT	GO:0033554~cellular response to stress	13	21.6667	0.00332064	PLK2, HFE, SLC1A1, NREP, VLDLR, HK2, DNAJA1, TCIM, LEP, LRRC8C, PPARG, SLC38A3, CPEB2	49	2106	20051	2.52595	0.999481	0.162867	0.160001
	GOTERM_BP_FAT	GO:0051128~regulation of cellular component organization	16	26.6667	0.0033983	POSTN, DYNLT1B, CLSTN2, PLK2, NCAN, HFE, CXCR4, VLDLR, FNBP1L, HK2, APLN, OLFM1, TUBA1A, APLNR, PPARG, ITGA6	49	3007	20051	2.17734	0.999565	0.162867	0.160001
	GOTERM_BP_FAT	GO:0071345~cellular response to cytokine stimulus	9	15	0.00346108	POSTN, MAT2A, LEP, SLC1A1, CXCR4, PPARG, OTOP1, TNFRSF21, HK2	49	1063	20051	3.46457	0.999623	0.162867	0.160001
	GOTERM_BP_FAT	GO:0051130~positive regulation of cellular component organization	11	18.3333	0.00355094	DYNLT1B, CLSTN2, HFE, APLNR, CXCR4, ITGA6, PPARG, VLDLR, FNBP1L, HK2, APLN	49	1572	20051	2.86339	0.999693	0.162867	0.160001
	GOTERM_BP_FAT	GO:0048666~neuron development	10	16.6667	0.00358264	OLFM1, POSTN, DYNLT1B, PLK2, LEP, CXCR4, ITGA6, VLDLR, NREP, TNFRSF21	49	1315	20051	3.11182	0.999715	0.162867	0.160001
	GOTERM_BP_FAT	GO:0010243~response to organonitrogen compound	9	15	0.00437815	SERPINA1A, MAT2A, LEP, SLC1A1, CXCR4, ABCC9, PPARG, OTOP1, CPEB2	49	1105	20051	3.33288	0.999954	0.187853	0.184547
	GOTERM_BP_FAT	GO:0031175~neuron projection development	9	15	0.00445024	OLFM1, POSTN, DYNLT1B, PLK2, CXCR4, ITGA6, VLDLR, NREP, TNFRSF21	49	1108	20051	3.32386	0.999961	0.187853	0.184547
	GOTERM_BP_FAT	GO:0009966~regulation of signal transduction	16	26.6667	0.00451156	POSTN, DYNLT1B, HFE, CXCR4, NREP, OTOP1, SEZ6L2, APLN, DNAJA1, RGS5, TCIM, LEP, APLNR, PPARG, ITGA6, SOX7	49	3096	20051	2.11475	0.999966	0.187853	0.184547
	GOTERM_BP_FAT	GO:0031670~cellular response to nutrient	3	5	0.00454549	POSTN, LEP, PPARG	49	42	20051	29.2289	0.999968	0.187853	0.184547
	GOTERM_BP_FAT	GO:0015804~neutral amino acid transport	3	5	0.00454549	LEP, SLC1A1, SLC38A3	49	42	20051	29.2289	0.999968	0.187853	0.184547
	GOTERM_BP_FAT	GO:2000485~regulation of glutamine transport	2	3.33333	0.00478218	LEP, SLC38A3	49	2	20051	409.204	0.999982	0.194105	0.190689
	GOTERM_BP_FAT	GO:0043065~positive regulation of apoptotic process	7	11.6667	0.00555295	DNAJA1, OLFM1, LEP, SLC1A1, ITGA6, PPARG, SOX7	49	683	20051	4.19389	0.999997	0.219364	0.215503
	GOTERM_BP_FAT	GO:0043068~positive regulation of programmed cell death	7	11.6667	0.0057504	DNAJA1, OLFM1, LEP, SLC1A1, ITGA6, PPARG, SOX7	49	688	20051	4.16341	0.999998	0.219364	0.215503
	GOTERM_BP_FAT	GO:0022008~neurogenesis	12	20	0.00575718	OLFM1, POSTN, DYNLT1B, PLK2, LEP, SLC1A1, CXCR4, ITGA6, PPARG, VLDLR, NREP, TNFRSF21	49	1963	20051	2.5015	0.999998	0.219364	0.215503
	GOTERM_BP_FAT	GO:0045859~regulation of protein kinase activity	7	11.6667	0.0057905	DNAJA1, TCIM, CCNG2, LEP, SLC1A1, PPARG, VLDLR	49	689	20051	4.15737	0.999998	0.219364	0.215503
	GOTERM_BP_FAT	GO:0071310~cellular response to organic substance	15	25	0.00593378	POSTN, HFE, SLC1A1, CXCR4, NREP, OTOP1, HK2, APLN, DNAJA1, MAT2A, LEP, PPARG, ITGA6, CPEB2, TNFRSF21	49	2870	20051	2.1387	0.999999	0.221106	0.217215
	GOTERM_BP_FAT	GO:0031329~regulation of cellular catabolic process	7	11.6667	0.00616075	PPP1R3C, HFE, PLK2, LEP, PPP1R3D, TRP53INP2, HK2	49	698	20051	4.10377	0.999999	0.225861	0.221886
	GOTERM_BP_FAT	GO:0070887~cellular response to chemical stimulus	17	28.3333	0.00642236	POSTN, HFE, SLC1A1, CXCR4, NREP, OTOP1, VLDLR, HK2, APLN, DNAJA1, SYT12, MAT2A, LEP, PPARG, ITGA6, CPEB2, TNFRSF21	49	3538	20051	1.96622	1	0.230469	0.226413
	GOTERM_BP_FAT	GO:0006468~protein phosphorylation	12	20	0.006594	DNAJA1, DYNLT1B, TCIM, HFE, CCNG2, PLK2, LEP, SLC1A1, APLNR, CXCR4, PPARG, VLDLR	49	1999	20051	2.45645	1	0.230469	0.226413
	GOTERM_BP_FAT	GO:0006796~phosphate-containing compound metabolic process	16	26.6667	0.00663026	PANK3, DYNLT1B, PLK2, HFE, SLC1A1, CXCR4, VLDLR, HK2, APLN, DNAJA1, TCIM, CCNG2, LEP, APLNR, PPARG, ITGA6	49	3224	20051	2.03079	1	0.230469	0.226413
	GOTERM_BP_FAT	GO:0071495~cellular response to endogenous stimulus	10	16.6667	0.00669201	DNAJA1, POSTN, HFE, LEP, SLC1A1, PPARG, OTOP1, NREP, CPEB2, APLN	49	1447	20051	2.82795	1	0.230469	0.226413
	GOTERM_BP_FAT	GO:0051094~positive regulation of developmental process	11	18.3333	0.00703391	OLFM1, DYNLT1B, CLSTN2, PLK2, LEP, APLNR, CXCR4, ITGA6, PPARG, VLDLR, HK2	49	1732	20051	2.59887	1	0.232653	0.228559
	GOTERM_BP_FAT	GO:0032270~positive regulation of cellular protein metabolic process	11	18.3333	0.00706197	TCIM, HFE, PLK2, LEP, SLC1A1, APLNR, PRR16, CXCR4, PPARG, VLDLR, SOX7	49	1733	20051	2.59737	1	0.232653	0.228559
	GOTERM_BP_FAT	GO:0006898~receptor-mediated endocytosis	5	8.33333	0.00713344	HFE, PPARG, VLDLR, FNBP1L, APLN	49	320	20051	6.39381	1	0.232653	0.228559
	GOTERM_BP_FAT	GO:0060183~apelin receptor signaling pathway	2	3.33333	0.00716486	APLNR, APLN	49	3	20051	272.803	1	0.232653	0.228559
	GOTERM_BP_FAT	GO:0014070~response to organic cyclic compound	9	15	0.00735711	DNAJA1, POSTN, MAT2A, LEP, SLC1A1, CXCR4, ABCC9, ITGA6, PPARG	49	1206	20051	3.05376	1	0.233009	0.228908
	GOTERM_BP_FAT	GO:0006811~ion transport	11	18.3333	0.00752306	SYT12, HFE, LEP, SLC1A1, APLNR, LRRC8C, CXCR4, ABCC9, PPARG, OTOP1, SLC38A3	49	1749	20051	2.57361	1	0.233009	0.228908
	GOTERM_BP_FAT	GO:0051049~regulation of transport	12	20	0.0075523	DNAJA1, SYT12, HFE, LEP, SLC1A1, APLNR, CXCR4, ABCC9, PPARG, SLC38A3, HK2, APLN	49	2036	20051	2.41181	1	0.233009	0.228908
	GOTERM_BP_FAT	GO:0008219~cell death	13	21.6667	0.00758586	DYNLT1B, PLK2, SLC1A1, CXCR4, HK2, DNAJA1, OLFM1, TCIM, LEP, PPARG, ITGA6, SOX7, TNFRSF21	49	2333	20051	2.28018	1	0.233009	0.228908
	GOTERM_BP_FAT	GO:0006865~amino acid transport	4	6.66667	0.00808543	LEP, SLC1A1, LRRC8C, SLC38A3	49	172	20051	9.51637	1	0.245042	0.24073
	GOTERM_BP_FAT	GO:0048713~regulation of oligodendrocyte differentiation	3	5	0.00823591	CXCR4, PPARG, TNFRSF21	49	57	20051	21.5371	1	0.246319	0.241984
	GOTERM_BP_FAT	GO:0006793~phosphorus metabolic process	16	26.6667	0.00844437	PANK3, DYNLT1B, PLK2, HFE, SLC1A1, CXCR4, VLDLR, HK2, APLN, DNAJA1, TCIM, CCNG2, LEP, APLNR, PPARG, ITGA6	49	3309	20051	1.97862	1	0.247003	0.242656
	GOTERM_BP_FAT	GO:0046887~positive regulation of hormone secretion	4	6.66667	0.00847612	HFE, LEP, PPARG, APLN	49	175	20051	9.35324	1	0.247003	0.242656
	GOTERM_BP_FAT	GO:0001936~regulation of endothelial cell proliferation	4	6.66667	0.00874266	LEP, APLNR, PPARG, APLN	49	177	20051	9.24755	1	0.251545	0.247119
	GOTERM_BP_FAT	GO:0010942~positive regulation of cell death	7	11.6667	0.00919993	DNAJA1, OLFM1, LEP, SLC1A1, ITGA6, PPARG, SOX7	49	760	20051	3.76898	1	0.261393	0.256793
	GOTERM_BP_FAT	GO:0051247~positive regulation of protein metabolic process	11	18.3333	0.00997097	TCIM, HFE, PLK2, LEP, SLC1A1, APLNR, PRR16, CXCR4, PPARG, VLDLR, SOX7	49	1823	20051	2.46914	1	0.276203	0.271343
	GOTERM_BP_FAT	GO:0044060~regulation of endocrine process	3	5	0.00998684	LEP, PPARG, APLN	49	63	20051	19.4859	1	0.276203	0.271343
	GOTERM_BP_FAT	GO:0048699~generation of neurons	11	18.3333	0.010119	OLFM1, POSTN, DYNLT1B, PLK2, LEP, CXCR4, ITGA6, PPARG, VLDLR, NREP, TNFRSF21	49	1827	20051	2.46374	1	0.276203	0.271343
	GOTERM_BP_FAT	GO:0030162~regulation of proteolysis	7	11.6667	0.0102552	SERPINA1A, HFE, PLK2, SERPINA3B, SLC1A1, PPARG, SOX7	49	778	20051	3.68178	1	0.276203	0.271343
	GOTERM_BP_FAT	GO:1901698~response to nitrogen compound	9	15	0.0103288	SERPINA1A, MAT2A, LEP, SLC1A1, CXCR4, ABCC9, PPARG, OTOP1, CPEB2	49	1279	20051	2.87947	1	0.276203	0.271343
	GOTERM_BP_FAT	GO:0052548~regulation of endopeptidase activity	5	8.33333	0.0107839	SERPINA1A, SERPINA3B, SLC1A1, PPARG, SOX7	49	361	20051	5.66765	1	0.28502	0.280004
	GOTERM_BP_FAT	GO:0043549~regulation of kinase activity	7	11.6667	0.0110053	DNAJA1, TCIM, CCNG2, LEP, SLC1A1, PPARG, VLDLR	49	790	20051	3.62586	1	0.287529	0.282469
	GOTERM_BP_FAT	GO:0046942~carboxylic acid transport	5	8.33333	0.0114029	LEP, SLC1A1, LRRC8C, PPARG, SLC38A3	49	367	20051	5.57499	1	0.292908	0.287754
	GOTERM_BP_FAT	GO:0009968~negative regulation of signal transduction	9	15	0.0116804	DNAJA1, RGS5, DYNLT1B, TCIM, APLNR, ITGA6, PPARG, OTOP1, APLN	49	1307	20051	2.81778	1	0.292908	0.287754
	GOTERM_BP_FAT	GO:0015849~organic acid transport	5	8.33333	0.0117208	LEP, SLC1A1, LRRC8C, PPARG, SLC38A3	49	370	20051	5.52978	1	0.292908	0.287754
	GOTERM_BP_FAT	GO:0043269~regulation of ion transport	7	11.6667	0.0117266	SYT12, HFE, LEP, APLNR, CXCR4, ABCC9, SLC38A3	49	801	20051	3.57607	1	0.292908	0.287754
	GOTERM_BP_FAT	GO:0045766~positive regulation of angiogenesis	4	6.66667	0.0120016	PLK2, APLNR, CXCR4, HK2	49	199	20051	8.22521	1	0.296517	0.291299
	GOTERM_BP_FAT	GO:0060986~endocrine hormone secretion	3	5	0.012219	LEP, PPARG, APLN	49	70	20051	17.5373	1	0.298101	0.292855
	GOTERM_BP_FAT	GO:0009266~response to temperature stimulus	4	6.66667	0.012328	DNAJA1, TCIM, CXCR4, PPARG	49	201	20051	8.14336	1	0.298101	0.292855
	GOTERM_BP_FAT	GO:0071705~nitrogen compound transport	12	20	0.0127843	DNAJA1, DYNLT1B, PPP1R3C, SYT12, HFE, LEP, SLC1A1, LRRC8C, PPARG, VLDLR, SLC38A3, APLN	49	2190	20051	2.24221	1	0.304051	0.298701
	GOTERM_BP_FAT	GO:0035904~aorta development	3	5	0.0128933	LEP, APLNR, CXCR4	49	72	20051	17.0502	1	0.304051	0.298701
	GOTERM_BP_FAT	GO:0045664~regulation of neuron differentiation	7	11.6667	0.0131963	OLFM1, DYNLT1B, PLK2, CXCR4, ITGA6, VLDLR, NREP	49	822	20051	3.48471	1	0.304051	0.298701
	GOTERM_BP_FAT	GO:0048662~negative regulation of smooth muscle cell proliferation	3	5	0.0132364	RGS5, PPARG, APLN	49	73	20051	16.8166	1	0.304051	0.298701
	GOTERM_BP_FAT	GO:0060341~regulation of cellular localization	8	13.3333	0.0132429	DNAJA1, SYT12, HFE, LEP, SLC1A1, APLNR, PPARG, TRP53INP2	49	1072	20051	3.05376	1	0.304051	0.298701
	GOTERM_BP_FAT	GO:1904705~regulation of vascular smooth muscle cell proliferation	3	5	0.0135836	RGS5, PPARG, APLN	49	74	20051	16.5894	1	0.306577	0.301182
	GOTERM_BP_FAT	GO:0001934~positive regulation of protein phosphorylation	8	13.3333	0.0136235	TCIM, HFE, LEP, SLC1A1, APLNR, CXCR4, PPARG, VLDLR	49	1078	20051	3.03676	1	0.306577	0.301182
	GOTERM_BP_FAT	GO:0030182~neuron differentiation	10	16.6667	0.0137575	OLFM1, POSTN, DYNLT1B, PLK2, LEP, CXCR4, ITGA6, VLDLR, NREP, TNFRSF21	49	1624	20051	2.51973	1	0.306577	0.301182
	GOTERM_BP_FAT	GO:0060331~negative regulation of response to interferon-gamma	2	3.33333	0.0142795	PPARG, OTOP1	49	6	20051	136.401	1	0.311476	0.305995
	GOTERM_BP_FAT	GO:0060336~negative regulation of interferon-gamma-mediated signaling pathway	2	3.33333	0.0142795	PPARG, OTOP1	49	6	20051	136.401	1	0.311476	0.305995
	GOTERM_BP_FAT	GO:0009991~response to extracellular stimulus	6	10	0.0144695	POSTN, HFE, LEP, ITGA6, PPARG, SLC38A3	49	605	20051	4.05822	1	0.311476	0.305995
	GOTERM_BP_FAT	GO:1990874~vascular smooth muscle cell proliferation	3	5	0.0146484	RGS5, PPARG, APLN	49	77	20051	15.943	1	0.311476	0.305995
	GOTERM_BP_FAT	GO:0031344~regulation of cell projection organization	7	11.6667	0.0147918	OLFM1, DYNLT1B, PLK2, CXCR4, ITGA6, VLDLR, FNBP1L	49	843	20051	3.3979	1	0.311476	0.305995
	GOTERM_BP_FAT	GO:0010941~regulation of cell death	11	18.3333	0.0147996	DNAJA1, OLFM1, DYNLT1B, TCIM, PLK2, LEP, SLC1A1, CXCR4, ITGA6, PPARG, SOX7	49	1935	20051	2.32622	1	0.311476	0.305995
	GOTERM_BP_FAT	GO:0051336~regulation of hydrolase activity	8	13.3333	0.0150874	SERPINA1A, DYNLT1B, SERPINA3B, SLC1A1, ITGA6, PPARG, CPEB2, SOX7	49	1100	20051	2.97603	1	0.31272	0.307217
	GOTERM_BP_FAT	GO:0071248~cellular response to metal ion	4	6.66667	0.015309	SYT12, HFE, SLC1A1, PPARG	49	218	20051	7.50833	1	0.31272	0.307217
	GOTERM_BP_FAT	GO:0048260~positive regulation of receptor-mediated endocytosis	3	5	0.0153778	HFE, PPARG, APLN	49	79	20051	15.5394	1	0.31272	0.307217
	GOTERM_BP_FAT	GO:1903827~regulation of cellular protein localization	6	10	0.015434	DNAJA1, HFE, LEP, SLC1A1, PPARG, TRP53INP2	49	615	20051	3.99223	1	0.31272	0.307217
	GOTERM_BP_FAT	GO:0044057~regulation of system process	6	10	0.015632	LEP, SLC1A1, ABCC9, PPARG, TNFRSF21, APLN	49	617	20051	3.97929	1	0.31272	0.307217
	GOTERM_BP_FAT	GO:1904018~positive regulation of vasculature development	4	6.66667	0.0156842	PLK2, APLNR, CXCR4, HK2	49	220	20051	7.44007	1	0.31272	0.307217
	GOTERM_BP_FAT	GO:0030155~regulation of cell adhesion	7	11.6667	0.0164332	POSTN, EMCN, HFE, LEP, CXCR4, ITGA6, TNFRSF21	49	863	20051	3.31915	1	0.324805	0.319089
	GOTERM_BP_FAT	GO:0006868~glutamine transport	2	3.33333	0.0166399	LEP, SLC38A3	49	7	20051	116.915	1	0.326055	0.320318
	GOTERM_BP_FAT	GO:0009894~regulation of catabolic process	7	11.6667	0.0168626	PPP1R3C, HFE, PLK2, LEP, PPP1R3D, TRP53INP2, HK2	49	868	20051	3.30003	1	0.32636	0.320617
	GOTERM_BP_FAT	GO:0010033~response to organic substance	17	28.3333	0.0172567	POSTN, HFE, SLC1A1, CXCR4, ABCC9, NREP, OTOP1, HK2, APLN, DNAJA1, SERPINA1A, MAT2A, LEP, PPARG, ITGA6, CPEB2, TNFRSF21	49	3926	20051	1.7719	1	0.32636	0.320617
	GOTERM_BP_FAT	GO:0034637~cellular carbohydrate biosynthetic process	3	5	0.0172682	PPP1R3C, LEP, PPP1R3D	49	84	20051	14.6144	1	0.32636	0.320617
	GOTERM_BP_FAT	GO:0032869~cellular response to insulin stimulus	4	6.66667	0.0174367	LEP, PPARG, OTOP1, CPEB2	49	229	20051	7.14767	1	0.32636	0.320617
	GOTERM_BP_FAT	GO:0010604~positive regulation of macromolecule metabolic process	16	26.6667	0.0174504	PLK2, HFE, SLC1A1, CXCR4, VLDLR, APLN, OLFM1, TCIM, LEP, PRR16, APLNR, PPARG, ITGA6, SLC38A3, SOX7, TRP53INP2	49	3589	20051	1.82426	1	0.32636	0.320617
	GOTERM_BP_FAT	GO:0060047~heart contraction	4	6.66667	0.0176379	SLC1A1, CXCR4, ABCC9, APLN	49	230	20051	7.11659	1	0.32636	0.320617
	GOTERM_BP_FAT	GO:0009893~positive regulation of metabolic process	17	28.3333	0.0176605	PLK2, HFE, SLC1A1, CXCR4, VLDLR, HK2, APLN, OLFM1, TCIM, LEP, PRR16, APLNR, PPARG, ITGA6, SLC38A3, SOX7, TRP53INP2	49	3936	20051	1.7674	1	0.32636	0.320617
	GOTERM_BP_FAT	GO:0006006~glucose metabolic process	4	6.66667	0.0178405	PPP1R3C, LEP, PPP1R3D, HK2	49	231	20051	7.08578	1	0.326518	0.320772
	GOTERM_BP_FAT	GO:0007417~central nervous system development	8	13.3333	0.0179564	NCAN, LEP, SLC1A1, CXCR4, PPARG, VLDLR, SLC38A3, SEZ6L2	49	1139	20051	2.87413	1	0.326518	0.320772
	GOTERM_BP_FAT	GO:0010975~regulation of neuron projection development	6	10	0.0182527	OLFM1, DYNLT1B, PLK2, CXCR4, ITGA6, VLDLR	49	642	20051	3.82434	1	0.329273	0.323478
	GOTERM_BP_FAT	GO:0031399~regulation of protein modification process	11	18.3333	0.0187915	DNAJA1, DYNLT1B, TCIM, HFE, CCNG2, LEP, SLC1A1, APLNR, CXCR4, PPARG, VLDLR	49	2008	20051	2.24166	1	0.336248	0.33033
	GOTERM_BP_FAT	GO:0035795~negative regulation of mitochondrial membrane permeability	2	3.33333	0.0189948	DYNLT1B, HK2	49	8	20051	102.301	1	0.336248	0.33033
	GOTERM_BP_FAT	GO:0031099~regeneration	4	6.66667	0.0190831	POSTN, HFE, PPARG, NREP	49	237	20051	6.9064	1	0.336248	0.33033
	GOTERM_BP_FAT	GO:0006915~apoptotic process	11	18.3333	0.0195798	DNAJA1, OLFM1, TCIM, PLK2, LEP, SLC1A1, ITGA6, PPARG, SOX7, TNFRSF21, HK2	49	2021	20051	2.22724	1	0.342345	0.33632
	GOTERM_BP_FAT	GO:0031325~positive regulation of cellular metabolic process	16	26.6667	0.0197954	PLK2, HFE, SLC1A1, CXCR4, VLDLR, HK2, APLN, TCIM, LEP, PRR16, APLNR, PPARG, ITGA6, SLC38A3, SOX7, TRP53INP2	49	3642	20051	1.79771	1	0.343322	0.33728
	GOTERM_BP_FAT	GO:0003015~heart process	4	6.66667	0.0199377	SLC1A1, CXCR4, ABCC9, APLN	49	241	20051	6.79177	1	0.343322	0.33728
	GOTERM_BP_FAT	GO:0022603~regulation of anatomical structure morphogenesis	8	13.3333	0.020243	OLFM1, POSTN, PLK2, LEP, APLNR, CXCR4, PPARG, HK2	49	1167	20051	2.80517	1	0.345238	0.339162
	GOTERM_BP_FAT	GO:0030030~cell projection organization	10	16.6667	0.0203528	OLFM1, POSTN, DYNLT1B, PLK2, CXCR4, ITGA6, VLDLR, NREP, FNBP1L, TNFRSF21	49	1734	20051	2.35989	1	0.345238	0.339162
	GOTERM_BP_FAT	GO:0051338~regulation of transferase activity	7	11.6667	0.020883	DNAJA1, TCIM, CCNG2, LEP, SLC1A1, PPARG, VLDLR	49	911	20051	3.14427	1	0.345802	0.339717
	GOTERM_BP_FAT	GO:0045685~regulation of glial cell differentiation	3	5	0.0209055	CXCR4, PPARG, TNFRSF21	49	93	20051	13.2001	1	0.345802	0.339717
	GOTERM_BP_FAT	GO:0019221~cytokine-mediated signaling pathway	5	8.33333	0.0209764	LEP, SLC1A1, CXCR4, PPARG, OTOP1	49	441	20051	4.6395	1	0.345802	0.339717
	GOTERM_BP_FAT	GO:0005981~regulation of glycogen catabolic process	2	3.33333	0.0213441	PPP1R3C, PPP1R3D	49	9	20051	90.9342	1	0.345802	0.339717
	GOTERM_BP_FAT	GO:0034214~protein hexamerization	2	3.33333	0.0213441	MAT2A, LRRC8C	49	9	20051	90.9342	1	0.345802	0.339717
	GOTERM_BP_FAT	GO:0006112~energy reserve metabolic process	3	5	0.0217536	PPP1R3C, LEP, PPP1R3D	49	95	20051	12.9222	1	0.345802	0.339717
	GOTERM_BP_FAT	GO:0014823~response to activity	3	5	0.0217536	POSTN, LEP, CXCR4	49	95	20051	12.9222	1	0.345802	0.339717
	GOTERM_BP_FAT	GO:0043067~regulation of programmed cell death	10	16.6667	0.0217659	DNAJA1, OLFM1, TCIM, PLK2, LEP, SLC1A1, CXCR4, ITGA6, PPARG, SOX7	49	1754	20051	2.33298	1	0.345802	0.339717
	GOTERM_BP_FAT	GO:0010647~positive regulation of cell communication	11	18.3333	0.0218248	DYNLT1B, CLSTN2, TCIM, SYT12, HFE, PLK2, LEP, SLC1A1, CXCR4, PPARG, APLN	49	2056	20051	2.18932	1	0.345802	0.339717
	GOTERM_BP_FAT	GO:0006914~autophagy	5	8.33333	0.0220767	PLK2, LEP, FNBP1L, TRP53INP2, HK2	49	448	20051	4.56701	1	0.345802	0.339717
	GOTERM_BP_FAT	GO:0090087~regulation of peptide transport	6	10	0.0221393	DNAJA1, HFE, LEP, SLC1A1, PPARG, APLN	49	675	20051	3.63737	1	0.345802	0.339717
	GOTERM_BP_FAT	GO:0009725~response to hormone	7	11.6667	0.0223226	SERPINA1A, DNAJA1, MAT2A, LEP, PPARG, OTOP1, CPEB2	49	925	20051	3.09668	1	0.345802	0.339717
	GOTERM_BP_FAT	GO:0023056~positive regulation of signaling	11	18.3333	0.0223638	DYNLT1B, CLSTN2, TCIM, SYT12, HFE, PLK2, LEP, SLC1A1, CXCR4, PPARG, APLN	49	2064	20051	2.18084	1	0.345802	0.339717
	GOTERM_BP_FAT	GO:0045444~fat cell differentiation	4	6.66667	0.0226274	LEP, LRRC8C, ITGA6, PPARG	49	253	20051	6.46963	1	0.347514	0.341399
	GOTERM_BP_FAT	GO:0052547~regulation of peptidase activity	5	8.33333	0.0228841	SERPINA1A, SERPINA3B, SLC1A1, PPARG, SOX7	49	453	20051	4.5166	1	0.349098	0.342955
	GOTERM_BP_FAT	GO:0090276~regulation of peptide hormone secretion	4	6.66667	0.0230941	HFE, LEP, PPARG, APLN	49	255	20051	6.41889	1	0.349952	0.343794
	GOTERM_BP_FAT	GO:1905709~negative regulation of membrane permeability	2	3.33333	0.023688	DYNLT1B, HK2	49	10	20051	81.8408	1	0.356575	0.3503
	GOTERM_BP_FAT	GO:0051962~positive regulation of nervous system development	6	10	0.0244719	DYNLT1B, CLSTN2, CXCR4, ITGA6, PPARG, VLDLR	49	693	20051	3.54289	1	0.365951	0.359511
	GOTERM_BP_FAT	GO:0042592~homeostatic process	11	18.3333	0.0252821	EMCN, DYNLT1B, HFE, LEP, SLC1A1, APLNR, CXCR4, PPARG, TRP53INP2, HK2, APLN	49	2105	20051	2.13836	1	0.375596	0.368986
	GOTERM_BP_FAT	GO:0006812~cation transport	8	13.3333	0.0255214	HFE, LEP, SLC1A1, APLNR, CXCR4, ABCC9, OTOP1, SLC38A3	49	1224	20051	2.67454	1	0.376689	0.37006
	GOTERM_BP_FAT	GO:0019318~hexose metabolic process	4	6.66667	0.0262554	PPP1R3C, LEP, PPP1R3D, HK2	49	268	20051	6.10752	1	0.385023	0.378248
	GOTERM_BP_FAT	GO:0033273~response to vitamin	3	5	0.026667	POSTN, LEP, PPARG	49	106	20051	11.5812	1	0.388552	0.381715
	GOTERM_BP_FAT	GO:0043434~response to peptide hormone	5	8.33333	0.0277395	SERPINA1A, LEP, PPARG, OTOP1, CPEB2	49	481	20051	4.25368	1	0.39978	0.392744
	GOTERM_BP_FAT	GO:1903522~regulation of blood circulation	4	6.66667	0.0277893	LEP, SLC1A1, ABCC9, APLN	49	274	20051	5.97378	1	0.39978	0.392744
	GOTERM_BP_FAT	GO:0012501~programmed cell death	11	18.3333	0.0285525	DNAJA1, OLFM1, TCIM, PLK2, LEP, SLC1A1, ITGA6, PPARG, SOX7, TNFRSF21, HK2	49	2147	20051	2.09653	1	0.408174	0.400991
	GOTERM_BP_FAT	GO:0015711~organic anion transport	5	8.33333	0.0298041	LEP, SLC1A1, LRRC8C, PPARG, SLC38A3	49	492	20051	4.15858	1	0.423404	0.415953
	GOTERM_BP_FAT	GO:0031346~positive regulation of cell projection organization	5	8.33333	0.030189	DYNLT1B, CXCR4, ITGA6, VLDLR, FNBP1L	49	494	20051	4.14174	1	0.426209	0.418709
	GOTERM_BP_FAT	GO:0042886~amide transport	10	16.6667	0.0305702	DNAJA1, DYNLT1B, PPP1R3C, HFE, LEP, SLC1A1, PPARG, VLDLR, SLC38A3, APLN	49	1861	20051	2.19884	1	0.428926	0.421378
	GOTERM_BP_FAT	GO:0050886~endocrine process	3	5	0.0314849	LEP, PPARG, APLN	49	116	20051	10.5829	1	0.43905	0.431324
	GOTERM_BP_FAT	GO:0007166~cell surface receptor signaling pathway	13	21.6667	0.0321372	HFE, SLC1A1, CXCR4, NREP, OTOP1, VLDLR, APLN, TCIM, LEP, PPARG, ITGA6, SOX7, TNFRSF21	49	2837	20051	1.8751	1	0.443955	0.436142
	GOTERM_BP_FAT	GO:0045595~regulation of cell differentiation	11	18.3333	0.0322983	OLFM1, POSTN, DYNLT1B, PLK2, LEP, CXCR4, ITGA6, PPARG, VLDLR, NREP, TNFRSF21	49	2191	20051	2.05442	1	0.443955	0.436142
	GOTERM_BP_FAT	GO:0060840~artery development	3	5	0.0324869	LEP, APLNR, CXCR4	49	118	20051	10.4035	1	0.443955	0.436142
	GOTERM_BP_FAT	GO:0034220~ion transmembrane transport	7	11.6667	0.0326681	HFE, SLC1A1, APLNR, LRRC8C, ABCC9, OTOP1, SLC38A3	49	1011	20051	2.83326	1	0.443955	0.436142
	GOTERM_BP_FAT	GO:0045906~negative regulation of vasoconstriction	2	3.33333	0.0330085	LEP, APLN	49	14	20051	58.4577	1	0.443955	0.436142
	GOTERM_BP_FAT	GO:0033197~response to vitamin E	2	3.33333	0.0330085	LEP, PPARG	49	14	20051	58.4577	1	0.443955	0.436142
	GOTERM_BP_FAT	GO:0051952~regulation of amine transport	3	5	0.0340134	SYT12, LEP, SLC38A3	49	121	20051	10.1456	1	0.450707	0.442775
	GOTERM_BP_FAT	GO:0071241~cellular response to inorganic substance	4	6.66667	0.0341054	SYT12, HFE, SLC1A1, PPARG	49	297	20051	5.51117	1	0.450707	0.442775
	GOTERM_BP_FAT	GO:0032868~response to insulin	4	6.66667	0.0341054	LEP, PPARG, OTOP1, CPEB2	49	297	20051	5.51117	1	0.450707	0.442775
	GOTERM_BP_FAT	GO:0043255~regulation of carbohydrate biosynthetic process	3	5	0.0345284	PPP1R3C, LEP, PPP1R3D	49	122	20051	10.0624	1	0.451052	0.443115
	GOTERM_BP_FAT	GO:0043534~blood vessel endothelial cell migration	3	5	0.0345284	PLK2, CXCR4, PPARG	49	122	20051	10.0624	1	0.451052	0.443115
	GOTERM_BP_FAT	GO:0015837~amine transport	3	5	0.0366188	SYT12, LEP, SLC38A3	49	126	20051	9.74295	1	0.470674	0.462392
	GOTERM_BP_FAT	GO:0009892~negative regulation of metabolic process	14	23.3333	0.0366615	DYNLT1B, HFE, HK2, APLN, DNAJA1, SERPINA1A, OLFM1, LEP, SERPINA3B, APLNR, PPARG, HMGN2, CPEB2, SOX7	49	3230	20051	1.77364	1	0.470674	0.462392
	GOTERM_BP_FAT	GO:0010506~regulation of autophagy	4	6.66667	0.036764	PLK2, LEP, TRP53INP2, HK2	49	306	20051	5.34907	1	0.470674	0.462392
	GOTERM_BP_FAT	GO:0044093~positive regulation of molecular function	9	15	0.0370399	TCIM, HFE, PLK2, LEP, SLC1A1, ITGA6, PPARG, VLDLR, SOX7	49	1620	20051	2.27336	1	0.470674	0.462392
	GOTERM_BP_FAT	GO:0005996~monosaccharide metabolic process	4	6.66667	0.0370659	PPP1R3C, LEP, PPP1R3D, HK2	49	307	20051	5.33165	1	0.470674	0.462392
	GOTERM_BP_FAT	GO:0030072~peptide hormone secretion	4	6.66667	0.0376734	HFE, LEP, PPARG, APLN	49	309	20051	5.29714	1	0.475732	0.46736
	GOTERM_BP_FAT	GO:0008277~regulation of G-protein coupled receptor protein signaling pathway	3	5	0.039299	DYNLT1B, APLNR, APLN	49	131	20051	9.37109	1	0.491928	0.483271
	GOTERM_BP_FAT	GO:0060330~regulation of response to interferon-gamma	2	3.33333	0.0399417	PPARG, OTOP1	49	17	20051	48.1417	1	0.491928	0.483271
	GOTERM_BP_FAT	GO:0043471~regulation of cellular carbohydrate catabolic process	2	3.33333	0.0399417	PPP1R3C, PPP1R3D	49	17	20051	48.1417	1	0.491928	0.483271
	GOTERM_BP_FAT	GO:0060334~regulation of interferon-gamma-mediated signaling pathway	2	3.33333	0.0399417	PPARG, OTOP1	49	17	20051	48.1417	1	0.491928	0.483271
	GOTERM_BP_FAT	GO:0048259~regulation of receptor-mediated endocytosis	3	5	0.0403915	HFE, PPARG, APLN	49	133	20051	9.23017	1	0.491928	0.483271
	GOTERM_BP_FAT	GO:0043280~positive regulation of cysteine-type endopeptidase activity involved in apoptotic process	3	5	0.0403915	SLC1A1, PPARG, SOX7	49	133	20051	9.23017	1	0.491928	0.483271
	GOTERM_BP_FAT	GO:0071375~cellular response to peptide hormone stimulus	4	6.66667	0.040471	LEP, PPARG, OTOP1, CPEB2	49	318	20051	5.14722	1	0.491928	0.483271
	GOTERM_BP_FAT	GO:0061564~axon development	5	8.33333	0.0407853	OLFM1, DYNLT1B, CXCR4, NREP, TNFRSF21	49	544	20051	3.76107	1	0.493111	0.484433
	GOTERM_BP_FAT	GO:0044262~cellular carbohydrate metabolic process	4	6.66667	0.0420698	PPP1R3C, LEP, PPP1R3D, HK2	49	323	20051	5.06754	1	0.505722	0.496822
	GOTERM_BP_FAT	GO:0023061~signal release	5	8.33333	0.0424188	SYT12, HFE, LEP, PPARG, APLN	49	551	20051	3.71329	1	0.505722	0.496822
	GOTERM_BP_FAT	GO:0048878~chemical homeostasis	8	13.3333	0.0425208	DYNLT1B, HFE, LEP, SLC1A1, APLNR, CXCR4, PPARG, HK2	49	1365	20051	2.39827	1	0.505722	0.496822
	GOTERM_BP_FAT	GO:0046883~regulation of hormone secretion	4	6.66667	0.0427183	HFE, LEP, PPARG, APLN	49	325	20051	5.03636	1	0.505722	0.496822
	GOTERM_BP_FAT	GO:0031401~positive regulation of protein modification process	8	13.3333	0.0429477	TCIM, HFE, LEP, SLC1A1, APLNR, CXCR4, PPARG, VLDLR	49	1368	20051	2.39301	1	0.505804	0.496903
	GOTERM_BP_FAT	GO:1901652~response to peptide	5	8.33333	0.0443311	SERPINA1A, LEP, PPARG, OTOP1, CPEB2	49	559	20051	3.66014	1	0.517185	0.508084
	GOTERM_BP_FAT	GO:0015810~aspartate transport	2	3.33333	0.0445368	SLC1A1, LRRC8C	49	19	20051	43.0741	1	0.517185	0.508084
	GOTERM_BP_FAT	GO:0007267~cell-cell signaling	9	15	0.0445967	CLSTN2, SYT12, HFE, PLK2, LEP, SLC1A1, PPARG, SOX7, APLN	49	1681	20051	2.19086	1	0.517185	0.508084
	GOTERM_BP_FAT	GO:0043043~peptide biosynthetic process	6	10	0.0448887	MT-TP, MT-RNR2, SLC1A1, PRR16, PPARG, CPEB2	49	817	20051	3.00517	1	0.517929	0.508814
	GOTERM_BP_FAT	GO:0001959~regulation of cytokine-mediated signaling pathway	3	5	0.0454484	CXCR4, PPARG, OTOP1	49	142	20051	8.64516	1	0.519362	0.510222
	GOTERM_BP_FAT	GO:0010605~negative regulation of macromolecule metabolic process	13	21.6667	0.0454699	DYNLT1B, HFE, APLN, DNAJA1, SERPINA1A, OLFM1, LEP, SERPINA3B, APLNR, PPARG, HMGN2, CPEB2, SOX7	49	2987	20051	1.78094	1	0.519362	0.510222
	GOTERM_BP_FAT	GO:0010906~regulation of glucose metabolic process	3	5	0.0466026	PPP1R3C, LEP, PPP1R3D	49	144	20051	8.52509	1	0.524315	0.515089
	GOTERM_BP_FAT	GO:0051235~maintenance of location	4	6.66667	0.0467148	LEP, APLNR, PPARG, HK2	49	337	20051	4.85702	1	0.524315	0.515089
	GOTERM_BP_FAT	GO:0031667~response to nutrient levels	5	8.33333	0.0467894	POSTN, HFE, LEP, PPARG, SLC38A3	49	569	20051	3.59582	1	0.524315	0.515089
	GOTERM_BP_FAT	GO:0060333~interferon-gamma-mediated signaling pathway	2	3.33333	0.0468262	PPARG, OTOP1	49	20	20051	40.9204	1	0.524315	0.515089
	GOTERM_BP_FAT	GO:0051050~positive regulation of transport	7	11.6667	0.0497664	HFE, LEP, APLNR, CXCR4, PPARG, SLC38A3, APLN	49	1120	20051	2.55753	1	0.554505	0.544747
	GOTERM_BP_FAT	GO:0098739~import across plasma membrane	3	5	0.0501294	HFE, SLC1A1, ABCC9	49	150	20051	8.18408	1	0.555825	0.546044
	GOTERM_BP_FAT	GO:0002526~acute inflammatory response	3	5	0.0507264	SERPINA1A, HFE, PPARG	49	151	20051	8.12988	1	0.558704	0.548872
	GOTERM_BP_FAT	GO:0050806~positive regulation of synaptic transmission	4	6.66667	0.0508911	CLSTN2, SYT12, PLK2, SLC1A1	49	349	20051	4.69002	1	0.558704	0.548872
	GOTERM_BP_FAT	GO:0060759~regulation of response to cytokine stimulus	3	5	0.0513261	CXCR4, PPARG, OTOP1	49	152	20051	8.0764	1	0.558704	0.548872
	GOTERM_BP_FAT	GO:0042981~regulation of apoptotic process	9	15	0.0513723	DNAJA1, OLFM1, TCIM, PLK2, LEP, SLC1A1, ITGA6, PPARG, SOX7	49	1730	20051	2.12881	1	0.558704	0.548872
	GOTERM_BP_FAT	GO:0071456~cellular response to hypoxia	3	5	0.052533	PPARG, VLDLR, CPEB2	49	154	20051	7.97151	1	0.568068	0.558071
	GOTERM_BP_FAT	GO:0001816~cytokine production	6	10	0.0527331	POSTN, HFE, LEP, SLC1A1, PPARG, TNFRSF21	49	855	20051	2.87161	1	0.568068	0.558071
	GOTERM_BP_FAT	GO:2001056~positive regulation of cysteine-type endopeptidase activity	3	5	0.0531403	SLC1A1, PPARG, SOX7	49	155	20051	7.92008	1	0.569754	0.559728
	GOTERM_BP_FAT	GO:0035357~peroxisome proliferator activated receptor signaling pathway	2	3.33333	0.0536624	LEP, PPARG	49	23	20051	35.583	1	0.570906	0.56086
	GOTERM_BP_FAT	GO:1903828~negative regulation of cellular protein localization	3	5	0.0537501	DNAJA1, PPARG, TRP53INP2	49	156	20051	7.86931	1	0.570906	0.56086
	GOTERM_BP_FAT	GO:0045862~positive regulation of proteolysis	4	6.66667	0.0559871	PLK2, SLC1A1, PPARG, SOX7	49	363	20051	4.50914	1	0.591901	0.581485
	GOTERM_BP_FAT	GO:0032870~cellular response to hormone stimulus	5	8.33333	0.0565406	DNAJA1, LEP, PPARG, OTOP1, CPEB2	49	606	20051	3.37627	1	0.594986	0.584515
	GOTERM_BP_FAT	GO:0043270~positive regulation of ion transport	4	6.66667	0.05711	LEP, APLNR, CXCR4, SLC38A3	49	366	20051	4.47218	1	0.598208	0.587681
	GOTERM_BP_FAT	GO:0015740~C4-dicarboxylate transport	2	3.33333	0.0581932	SLC1A1, LRRC8C	49	25	20051	32.7363	1	0.606757	0.596079
	GOTERM_BP_FAT	GO:1903532~positive regulation of secretion by cell	4	6.66667	0.058624	HFE, LEP, PPARG, APLN	49	370	20051	4.42383	1	0.608459	0.597751
	GOTERM_BP_FAT	GO:0002791~regulation of peptide secretion	4	6.66667	0.0593882	HFE, LEP, PPARG, APLN	49	372	20051	4.40004	1	0.613588	0.60279
	GOTERM_BP_FAT	GO:0050769~positive regulation of neurogenesis	5	8.33333	0.0602106	DYNLT1B, CXCR4, ITGA6, PPARG, VLDLR	49	619	20051	3.30536	1	0.617898	0.607024
	GOTERM_BP_FAT	GO:0006897~endocytosis	6	10	0.0603996	HFE, LEP, PPARG, VLDLR, FNBP1L, APLN	49	889	20051	2.76178	1	0.617898	0.607024
	GOTERM_BP_FAT	GO:0010508~positive regulation of autophagy	3	5	0.0606209	PLK2, TRP53INP2, HK2	49	167	20051	7.35097	1	0.617898	0.607024
	GOTERM_BP_FAT	GO:0014013~regulation of gliogenesis	3	5	0.0612599	CXCR4, PPARG, TNFRSF21	49	168	20051	7.30722	1	0.621624	0.610685
	GOTERM_BP_FAT	GO:1901653~cellular response to peptide	4	6.66667	0.0621001	LEP, PPARG, OTOP1, CPEB2	49	379	20051	4.31878	1	0.627349	0.616309
	GOTERM_BP_FAT	GO:0010950~positive regulation of endopeptidase activity	3	5	0.062545	SLC1A1, PPARG, SOX7	49	170	20051	7.22125	1	0.629047	0.617978
	GOTERM_BP_FAT	GO:0016052~carbohydrate catabolic process	3	5	0.063191	PPP1R3C, PPP1R3D, HK2	49	171	20051	7.17902	1	0.630858	0.619756
	GOTERM_BP_FAT	GO:0010976~positive regulation of neuron projection development	4	6.66667	0.0632801	DYNLT1B, CXCR4, ITGA6, VLDLR	49	382	20051	4.28486	1	0.630858	0.619756
	GOTERM_BP_FAT	GO:0006820~anion transport	5	8.33333	0.0643034	LEP, SLC1A1, LRRC8C, PPARG, SLC38A3	49	633	20051	3.23226	1	0.638261	0.627029
	GOTERM_BP_FAT	GO:0050808~synapse organization	4	6.66667	0.066074	CLSTN2, NCAN, SLC1A1, SEZ6L2	49	389	20051	4.20775	1	0.649481	0.638052
	GOTERM_BP_FAT	GO:0032269~negative regulation of cellular protein metabolic process	7	11.6667	0.066178	SERPINA1A, DNAJA1, DYNLT1B, HFE, SERPINA3B, PPARG, CPEB2	49	1204	20051	2.37909	1	0.649481	0.638052
	GOTERM_BP_FAT	GO:0006508~proteolysis	9	15	0.0665443	SERPINA1A, RNF11, HFE, PLK2, SERPINA3B, SLC1A1, PPARG, SOX7, TRP53INP2	49	1826	20051	2.01689	1	0.649481	0.638052
	GOTERM_BP_FAT	GO:0015833~peptide transport	9	15	0.0670598	DNAJA1, DYNLT1B, PPP1R3C, HFE, LEP, SLC1A1, PPARG, VLDLR, APLN	49	1829	20051	2.01358	1	0.649481	0.638052
	GOTERM_BP_FAT	GO:0003171~atrioventricular valve development	2	3.33333	0.067191	OLFM1, APLNR	49	29	20051	28.221	1	0.649481	0.638052
	GOTERM_BP_FAT	GO:0046879~hormone secretion	4	6.66667	0.0681044	HFE, LEP, PPARG, APLN	49	394	20051	4.15436	1	0.649481	0.638052
	GOTERM_BP_FAT	GO:0043604~amide biosynthetic process	6	10	0.0681752	MT-TP, MT-RNR2, SLC1A1, PRR16, PPARG, CPEB2	49	921	20051	2.66582	1	0.649481	0.638052
	GOTERM_BP_FAT	GO:0043085~positive regulation of catalytic activity	7	11.6667	0.0683238	TCIM, LEP, SLC1A1, ITGA6, PPARG, VLDLR, SOX7	49	1214	20051	2.3595	1	0.649481	0.638052
	GOTERM_BP_FAT	GO:0030001~metal ion transport	6	10	0.068932	HFE, SLC1A1, APLNR, CXCR4, ABCC9, SLC38A3	49	924	20051	2.65717	1	0.649481	0.638052
	GOTERM_BP_FAT	GO:0101023~vascular endothelial cell proliferation	2	3.33333	0.0694273	PPARG, APLN	49	30	20051	27.2803	1	0.649481	0.638052
	GOTERM_BP_FAT	GO:0010675~regulation of cellular carbohydrate metabolic process	3	5	0.069775	PPP1R3C, LEP, PPP1R3D	49	181	20051	6.78239	1	0.649481	0.638052
	GOTERM_BP_FAT	GO:0043279~response to alkaloid	3	5	0.0704455	SLC1A1, CXCR4, PPARG	49	182	20051	6.74512	1	0.649481	0.638052
	GOTERM_BP_FAT	GO:0014074~response to purine-containing compound	3	5	0.0704455	MAT2A, ABCC9, PPARG	49	182	20051	6.74512	1	0.649481	0.638052
	GOTERM_BP_FAT	GO:1903533~regulation of protein targeting	3	5	0.0704455	LEP, SLC1A1, PPARG	49	182	20051	6.74512	1	0.649481	0.638052
	GOTERM_BP_FAT	GO:0009611~response to wounding	5	8.33333	0.0716558	POSTN, SLC1A1, CXCR4, PPARG, NREP	49	657	20051	3.11419	1	0.649481	0.638052
	GOTERM_BP_FAT	GO:0010962~regulation of glucan biosynthetic process	2	3.33333	0.0716583	PPP1R3C, PPP1R3D	49	31	20051	26.4003	1	0.649481	0.638052
	GOTERM_BP_FAT	GO:0022401~negative adaptation of signaling pathway	2	3.33333	0.0716583	APLNR, APLN	49	31	20051	26.4003	1	0.649481	0.638052
	GOTERM_BP_FAT	GO:0010460~positive regulation of heart rate	2	3.33333	0.0716583	SLC1A1, APLN	49	31	20051	26.4003	1	0.649481	0.638052
	GOTERM_BP_FAT	GO:1905562~regulation of vascular endothelial cell proliferation	2	3.33333	0.0716583	PPARG, APLN	49	31	20051	26.4003	1	0.649481	0.638052
	GOTERM_BP_FAT	GO:0002029~desensitization of G-protein coupled receptor protein signaling pathway	2	3.33333	0.0716583	APLNR, APLN	49	31	20051	26.4003	1	0.649481	0.638052
	GOTERM_BP_FAT	GO:0005979~regulation of glycogen biosynthetic process	2	3.33333	0.0716583	PPP1R3C, PPP1R3D	49	31	20051	26.4003	1	0.649481	0.638052
	GOTERM_BP_FAT	GO:0060548~negative regulation of cell death	7	11.6667	0.0722897	DNAJA1, DYNLT1B, TCIM, PLK2, LEP, SLC1A1, ITGA6	49	1232	20051	2.32502	1	0.649481	0.638052
	GOTERM_BP_FAT	GO:0098657~import into cell	3	5	0.0724698	HFE, SLC1A1, ABCC9	49	185	20051	6.63574	1	0.649481	0.638052
	GOTERM_BP_FAT	GO:0009914~hormone transport	4	6.66667	0.0726715	HFE, LEP, PPARG, APLN	49	405	20051	4.04152	1	0.649481	0.638052
	GOTERM_BP_FAT	GO:0007155~cell adhesion	8	13.3333	0.0728902	POSTN, EMCN, CLSTN2, HFE, NCAN, LEP, ITGA6, TNFRSF21	49	1543	20051	2.1216	1	0.649481	0.638052
	GOTERM_BP_FAT	GO:0045597~positive regulation of cell differentiation	7	11.6667	0.0729637	OLFM1, DYNLT1B, LEP, CXCR4, ITGA6, PPARG, VLDLR	49	1235	20051	2.31938	1	0.649481	0.638052
	GOTERM_BP_FAT	GO:0036294~cellular response to decreased oxygen levels	3	5	0.0731488	PPARG, VLDLR, CPEB2	49	186	20051	6.60007	1	0.649481	0.638052
	GOTERM_BP_FAT	GO:0010952~positive regulation of peptidase activity	3	5	0.0738299	SLC1A1, PPARG, SOX7	49	187	20051	6.56477	1	0.652978	0.641487
	GOTERM_BP_FAT	GO:0022610~biological adhesion	8	13.3333	0.0755196	POSTN, EMCN, CLSTN2, HFE, NCAN, LEP, ITGA6, TNFRSF21	49	1556	20051	2.10388	1	0.661804	0.650158
	GOTERM_BP_FAT	GO:0001935~endothelial cell proliferation	3	5	0.0758855	APLNR, PPARG, APLN	49	190	20051	6.46112	1	0.661804	0.650158
	GOTERM_BP_FAT	GO:0023058~adaptation of signaling pathway	2	3.33333	0.0761047	APLNR, APLN	49	33	20051	24.8002	1	0.661804	0.650158
	GOTERM_BP_FAT	GO:0048714~positive regulation of oligodendrocyte differentiation	2	3.33333	0.0761047	CXCR4, PPARG	49	33	20051	24.8002	1	0.661804	0.650158
	GOTERM_BP_FAT	GO:0030534~adult behavior	3	5	0.0765748	LEP, SLC1A1, SEZ6L2	49	191	20051	6.42729	1	0.661804	0.650158
	GOTERM_BP_FAT	GO:0007584~response to nutrient	3	5	0.0765748	POSTN, LEP, PPARG	49	191	20051	6.42729	1	0.661804	0.650158
	GOTERM_BP_FAT	GO:0043409~negative regulation of MAPK cascade	3	5	0.0772661	DNAJA1, DYNLT1B, PPARG	49	192	20051	6.39381	1	0.66525	0.653543
	GOTERM_BP_FAT	GO:0015718~monocarboxylic acid transport	3	5	0.0779594	LEP, PPARG, SLC38A3	49	193	20051	6.36069	1	0.668686	0.656919
	GOTERM_BP_FAT	GO:0010038~response to metal ion	4	6.66667	0.0795556	SYT12, HFE, SLC1A1, PPARG	49	421	20051	3.88792	1	0.679811	0.667848
	GOTERM_BP_FAT	GO:0048659~smooth muscle cell proliferation	3	5	0.0800514	RGS5, PPARG, APLN	49	196	20051	6.26333	1	0.679817	0.667854
	GOTERM_BP_FAT	GO:0010888~negative regulation of lipid storage	2	3.33333	0.0805302	LEP, PPARG	49	35	20051	23.3831	1	0.679817	0.667854
	GOTERM_BP_FAT	GO:0048660~regulation of smooth muscle cell proliferation	3	5	0.0807526	RGS5, PPARG, APLN	49	197	20051	6.23153	1	0.679817	0.667854
	GOTERM_BP_FAT	GO:0007369~gastrulation	3	5	0.0807526	APLNR, SOX7, APLN	49	197	20051	6.23153	1	0.679817	0.667854
	GOTERM_BP_FAT	GO:0051248~negative regulation of protein metabolic process	7	11.6667	0.0815788	SERPINA1A, DNAJA1, DYNLT1B, HFE, SERPINA3B, PPARG, CPEB2	49	1272	20051	2.25191	1	0.684239	0.672198
	GOTERM_BP_FAT	GO:0007507~heart development	5	8.33333	0.0841491	OLFM1, APLNR, CXCR4, PPARG, APLN	49	695	20051	2.94391	1	0.696345	0.684091
	GOTERM_BP_FAT	GO:0008016~regulation of heart contraction	3	5	0.0842877	SLC1A1, ABCC9, APLN	49	202	20051	6.07729	1	0.696345	0.684091
	GOTERM_BP_FAT	GO:0048812~neuron projection morphogenesis	5	8.33333	0.0844917	OLFM1, POSTN, DYNLT1B, CXCR4, VLDLR	49	696	20051	2.93968	1	0.696345	0.684091
	GOTERM_BP_FAT	GO:0098656~anion transmembrane transport	3	5	0.085715	SLC1A1, LRRC8C, SLC38A3	49	204	20051	6.01771	1	0.696345	0.684091
	GOTERM_BP_FAT	GO:0006091~generation of precursor metabolites and energy	4	6.66667	0.0862613	PPP1R3C, LEP, PPP1R3D, HK2	49	436	20051	3.75417	1	0.696345	0.684091
	GOTERM_BP_FAT	GO:0002695~negative regulation of leukocyte activation	3	5	0.0864315	HFE, PPARG, TNFRSF21	49	205	20051	5.98835	1	0.696345	0.684091
	GOTERM_BP_FAT	GO:0045807~positive regulation of endocytosis	3	5	0.0864315	HFE, PPARG, APLN	49	205	20051	5.98835	1	0.696345	0.684091
	GOTERM_BP_FAT	GO:0071453~cellular response to oxygen levels	3	5	0.0864315	PPARG, VLDLR, CPEB2	49	205	20051	5.98835	1	0.696345	0.684091
	GOTERM_BP_FAT	GO:0070873~regulation of glycogen metabolic process	2	3.33333	0.0871296	PPP1R3C, PPP1R3D	49	38	20051	21.5371	1	0.696345	0.684091
	GOTERM_BP_FAT	GO:0043278~response to morphine	2	3.33333	0.0871296	SLC1A1, CXCR4	49	38	20051	21.5371	1	0.696345	0.684091
	GOTERM_BP_FAT	GO:0051099~positive regulation of binding	3	5	0.0871498	HFE, PLK2, PPARG	49	206	20051	5.95928	1	0.696345	0.684091
	GOTERM_BP_FAT	GO:0051047~positive regulation of secretion	4	6.66667	0.0871734	HFE, LEP, PPARG, APLN	49	438	20051	3.73702	1	0.696345	0.684091
	GOTERM_BP_FAT	GO:0006928~movement of cell or subcellular component	10	16.6667	0.088415	DNAJA1, POSTN, DYNLT1B, PLK2, LEP, CXCR4, ABCC9, ITGA6, PPARG, FNBP1L	49	2277	20051	1.79712	1	0.696345	0.684091
	GOTERM_BP_FAT	GO:0098609~cell-cell adhesion	6	10	0.0888013	EMCN, CLSTN2, HFE, LEP, ITGA6, TNFRSF21	49	997	20051	2.46261	1	0.696345	0.684091
	GOTERM_BP_FAT	GO:0002793~positive regulation of peptide secretion	3	5	0.0893156	HFE, PPARG, APLN	49	209	20051	5.87374	1	0.696345	0.684091
	GOTERM_BP_FAT	GO:0015800~acidic amino acid transport	2	3.33333	0.089319	SLC1A1, LRRC8C	49	39	20051	20.9848	1	0.696345	0.684091
	GOTERM_BP_FAT	GO:0014072~response to isoquinoline alkaloid	2	3.33333	0.089319	SLC1A1, CXCR4	49	39	20051	20.9848	1	0.696345	0.684091
	GOTERM_BP_FAT	GO:0071417~cellular response to organonitrogen compound	5	8.33333	0.0897147	LEP, SLC1A1, PPARG, OTOP1, CPEB2	49	711	20051	2.87767	1	0.696345	0.684091
	GOTERM_BP_FAT	GO:0010720~positive regulation of cell development	5	8.33333	0.0897147	DYNLT1B, CXCR4, ITGA6, PPARG, VLDLR	49	711	20051	2.87767	1	0.696345	0.684091
	GOTERM_BP_FAT	GO:0034613~cellular protein localization	9	15	0.0897779	DNAJA1, DYNLT1B, PPP1R3C, HFE, LEP, SLC1A1, PPARG, TRP53INP2, HK2	49	1949	20051	1.8896	1	0.696345	0.684091
	GOTERM_BP_FAT	GO:0071900~regulation of protein serine/threonine kinase activity	4	6.66667	0.0899346	DNAJA1, TCIM, CCNG2, PPARG	49	444	20051	3.68652	1	0.696345	0.684091
	GOTERM_BP_FAT	GO:0050807~regulation of synapse organization	3	5	0.0900411	TUBA1A, CLSTN2, NCAN	49	210	20051	5.84577	1	0.696345	0.684091
	GOTERM_BP_FAT	GO:0043086~negative regulation of catalytic activity	5	8.33333	0.0900684	SERPINA1A, DNAJA1, SERPINA3B, PPARG, CPEB2	49	712	20051	2.87362	1	0.696345	0.684091
	GOTERM_BP_FAT	GO:0048858~cell projection morphogenesis	5	8.33333	0.090778	OLFM1, POSTN, DYNLT1B, CXCR4, VLDLR	49	714	20051	2.86557	1	0.69673	0.684469
	GOTERM_BP_FAT	GO:0045860~positive regulation of protein kinase activity	4	6.66667	0.0908632	TCIM, LEP, SLC1A1, VLDLR	49	446	20051	3.66999	1	0.69673	0.684469
	GOTERM_BP_FAT	GO:0032885~regulation of polysaccharide biosynthetic process	2	3.33333	0.0915034	PPP1R3C, PPP1R3D	49	40	20051	20.4602	1	0.69673	0.684469
	GOTERM_BP_FAT	GO:1903530~regulation of secretion by cell	5	8.33333	0.0918475	SYT12, HFE, LEP, PPARG, APLN	49	717	20051	2.85358	1	0.69673	0.684469
	GOTERM_BP_FAT	GO:0070727~cellular macromolecule localization	9	15	0.0918567	DNAJA1, DYNLT1B, PPP1R3C, HFE, LEP, SLC1A1, PPARG, TRP53INP2, HK2	49	1959	20051	1.87996	1	0.69673	0.684469
	GOTERM_BP_FAT	GO:0006518~peptide metabolic process	6	10	0.0920346	MT-TP, MT-RNR2, SLC1A1, PRR16, PPARG, CPEB2	49	1008	20051	2.43574	1	0.69673	0.684469
	GOTERM_BP_FAT	GO:0050678~regulation of epithelial cell proliferation	4	6.66667	0.0922638	LEP, APLNR, PPARG, APLN	49	449	20051	3.64547	1	0.69673	0.684469
	GOTERM_BP_FAT	GO:0003012~muscle system process	4	6.66667	0.0932026	LEP, CXCR4, ABCC9, PPARG	49	451	20051	3.6293	1	0.69826	0.685972
	GOTERM_BP_FAT	GO:0032880~regulation of protein localization	6	10	0.0935247	DNAJA1, HFE, LEP, SLC1A1, PPARG, TRP53INP2	49	1013	20051	2.42372	1	0.69826	0.685972
	GOTERM_BP_FAT	GO:0098662~inorganic cation transmembrane transport	5	8.33333	0.0936436	HFE, SLC1A1, APLNR, ABCC9, OTOP1	49	722	20051	2.83382	1	0.69826	0.685972
	GOTERM_BP_FAT	GO:0006109~regulation of carbohydrate metabolic process	3	5	0.0936953	PPP1R3C, LEP, PPP1R3D	49	215	20051	5.70982	1	0.69826	0.685972
	GOTERM_BP_FAT	GO:0050777~negative regulation of immune response	3	5	0.095169	HFE, PPARG, OTOP1	49	217	20051	5.6572	1	0.706926	0.694485
	GOTERM_BP_FAT	GO:0043281~regulation of cysteine-type endopeptidase activity involved in apoptotic process	3	5	0.0966496	SLC1A1, PPARG, SOX7	49	219	20051	5.60554	1	0.715585	0.702992
	GOTERM_BP_FAT	GO:0072594~establishment of protein localization to organelle	4	6.66667	0.0989196	DNAJA1, LEP, PPARG, HK2	49	463	20051	3.53524	1	0.726992	0.714199
	GOTERM_BP_FAT	GO:0030522~intracellular receptor signaling pathway	3	5	0.0996307	DNAJA1, LEP, PPARG	49	223	20051	5.50499	1	0.726992	0.714199
	GOTERM_CC_FAT	GO:0055037~recycling endosome	4	6.66667	0.016437	RNF11, TUBA1A, HFE, SLC1A1	47	195	16713	7.29427	0.976768	1	1
	GOTERM_CC_FAT	GO:0042587~glycogen granule	2	3.33333	0.0218124	PPP1R3C, PPP1R3D	47	8	16713	88.8989	0.993304	1	1
	GOTERM_CC_FAT	GO:0031594~neuromuscular junction	3	5	0.0320742	POSTN, TUBA1A, PLS3	47	102	16713	10.4587	0.999389	1	1
	GOTERM_CC_FAT	GO:0043235~receptor complex	5	8.33333	0.0352752	OLFM1, HFE, ITGA6, PPARG, VLDLR	47	452	16713	3.93358	0.999712	1	1
	GOTERM_CC_FAT	GO:0000164~protein phosphatase type 1 complex	2	3.33333	0.0457952	PPP1R3C, PPP1R3D	47	17	16713	41.8348	0.999976	1	1
	GOTERM_CC_FAT	GO:0097458~neuron part	11	18.3333	0.05858	OLFM1, DYNLT1B, CLSTN2, SYT12, PLK2, SLC1A1, PLS3, CXCR4, SEZ6L2, CPEB2, TNFRSF21	47	2115	16713	1.84943	0.999999	1	1
	GOTERM_CC_FAT	GO:0045202~synapse	9	15	0.069427	OLFM1, POSTN, TUBA1A, CLSTN2, SYT12, NCAN, SLC1A1, PLS3, CPEB2	47	1605	16713	1.99399	1	1	1
	GOTERM_CC_FAT	GO:0005783~endoplasmic reticulum	10	16.6667	0.0719847	SERPINA1A, DNAJA1, OLFM1, CLSTN2, PRXL2B, ATL2, SLC1A1, LRRC8C, SEZ6L2, HK2	47	1903	16713	1.86861	1	1	1
	GOTERM_MF_FAT	GO:0030246~carbohydrate binding	5	8.33333	0.0074792	EMCN, PPP1R3C, NCAN, PPP1R3D, HK2	47	306	18102	6.29328	0.926652	1	1
	GOTERM_MF_FAT	GO:2001069~glycogen binding	2	3.33333	0.0226443	PPP1R3C, PPP1R3D	47	9	18102	85.5887	0.999655	1	1
	GOTERM_MF_FAT	GO:0005509~calcium ion binding	6	10	0.0367427	CLSTN2, SYT12, NCAN, PLS3, VLDLR, EFCAB8	47	729	18102	3.16995	0.999998	1	1
	GOTERM_MF_FAT	GO:0030247~polysaccharide binding	2	3.33333	0.0711839	PPP1R3C, PPP1R3D	47	29	18102	26.562	1	1	1
	GOTERM_MF_FAT	GO:0001871~pattern binding	2	3.33333	0.0711839	PPP1R3C, PPP1R3D	47	29	18102	26.562	1	1	1
	GOTERM_MF_FAT	GO:0008157~protein phosphatase 1 binding	2	3.33333	0.0829454	PPP1R3C, PPP1R3D	47	34	18102	22.6558	1	1	1
	GOTERM_MF_FAT	GO:0019903~protein phosphatase binding	3	5	0.0840192	PPP1R3C, PPP1R3D, PPARG	47	190	18102	6.0813	1	1	1
	GOTERM_MF_FAT	GO:0005216~ion channel activity	4	6.66667	0.0906809	SLC1A1, LRRC8C, ABCC9, OTOP1	47	420	18102	3.66809	1	1	1
	GOTERM_MF_FAT	GO:0022838~substrate-specific channel activity	4	6.66667	0.0961796	SLC1A1, LRRC8C, ABCC9, OTOP1	47	431	18102	3.57447	1	1	1
	KEGG_PATHWAY	mmu04724:Glutamatergic synapse	3	5	0.0477983	SLC1A1, GNB4, SLC38A3	29	113	8998	8.23741	0.990467	1	1
	KEGG_PATHWAY	mmu04371:Apelin signaling pathway	3	5	0.0672495	APLNR, GNB4, APLN	29	137	8998	6.79436	0.998658	1	1
	KEGG_PATHWAY	mmu04910:Insulin signaling pathway	3	5	0.0689742	PPP1R3C, PPP1R3D, HK2	29	139	8998	6.6966	0.998874	1	1
down regulated	GOTERM_BP_FAT	GO:0009719~response to endogenous stimulus	28	26.6667	1.28988e-07	ERRFI1, OXTR, CITED2, PTAFR, SLC1A3, IRS2, ATP2A1, ATP1A1, RXFP1, RERG, ZFP36, CHST11, SLIT3, NGFR, TRPC3, BMP8A, CYBB, FOS, MMP9, AGT, ACTA1, ANO1, WT1, ZYX, TXNIP, PGR, SGK1, NBL1	96	1903	20051	3.07315	0.000419767	0.000419726	0.0004116
	GOTERM_BP_FAT	GO:0048545~response to steroid hormone	12	11.4286	1.2467e-06	ACTA1, ERRFI1, ZFP36, OXTR, PTAFR, CYBB, TXNIP, SLIT3, PGR, ATP1A1, FOS, SGK1	96	365	20051	6.86678	0.00404979	0.00117641	0.00115363
	GOTERM_BP_FAT	GO:0009628~response to abiotic stimulus	22	20.9524	1.29988e-06	NGFR, ERRFI1, OXTR, PTGIS, CITED2, PTAFR, HSPB7, SLC1A3, CYBB, FOS, ATP1A1, MMP9, AGT, APOLD1, NET1, ACTA1, ANO1, RASA3, TXNIP, SIK1, SGK1, ASIC2	96	1368	20051	3.35893	0.00422216	0.00117641	0.00115363
	GOTERM_BP_FAT	GO:0009725~response to hormone	18	17.1429	1.44611e-06	ERRFI1, OXTR, PTAFR, CYBB, ATP2A1, IRS2, FOS, ATP1A1, RXFP1, AGT, RERG, ACTA1, ZFP36, WT1, TXNIP, PGR, SLIT3, SGK1	96	925	20051	4.06439	0.00469602	0.00117641	0.00115363
	GOTERM_BP_FAT	GO:0071495~cellular response to endogenous stimulus	22	20.9524	3.17449e-06	NGFR, ERRFI1, CITED2, PTAFR, BMP8A, SLC1A3, CYBB, IRS2, FOS, ATP1A1, RXFP1, AGT, ACTA1, ANO1, ZFP36, CHST11, WT1, ZYX, PGR, SLIT3, SGK1, NBL1	96	1447	20051	3.17555	0.0102798	0.00206596	0.00202596
	GOTERM_BP_FAT	GO:0071310~cellular response to organic substance	32	30.4762	4.74184e-06	ERRFI1, CSF1R, CITED2, SAA3, PTAFR, SLC1A3, IRS2, ATP1A1, RXFP1, ZFP36, CCL8, CHST11, SPOCK2, SLIT3, IFI208, NGFR, PTGIS, IL10RA, OSR1, BMP8A, CYBB, FOS, AGT, ACTA1, ANO1, WT1, AXL, ZYX, IGTP, PGR, SGK1, NBL1	96	2870	20051	2.3288	0.0153162	0.00257166	0.00252187
	GOTERM_BP_FAT	GO:0070887~cellular response to chemical stimulus	36	34.2857	6.53064e-06	ERRFI1, CSF1R, CITED2, SAA3, PTAFR, SLC1A3, IRS2, ATP1A1, RXFP1, ZFP36, CCL8, CHST11, SPOCK2, SLIT3, ASIC2, IFI208, NGFR, PTGIS, IL10RA, OSR1, BMP8A, CYBB, FOS, MMP9, AGT, NET1, ACTA1, ANO1, VNN1, WT1, AXL, ZYX, IGTP, PGR, SGK1, NBL1	96	3538	20051	2.12525	0.0210329	0.00303581	0.00297704
	GOTERM_BP_FAT	GO:0010033~response to organic substance	38	36.1905	9.66718e-06	ERRFI1, CSF1R, OXTR, CITED2, SAA3, PTAFR, SLC1A3, IRS2, ATP2A1, ATP1A1, RXFP1, RERG, ZFP36, CCL8, CHST11, SPOCK2, SLIT3, IFI208, NGFR, PTGIS, TRPC3, IL10RA, OSR1, BMP8A, CYBB, FOS, MMP9, AGT, ACTA1, ANO1, WT1, AXL, ZYX, IGTP, TXNIP, PGR, SGK1, NBL1	96	3926	20051	2.02161	0.0309769	0.00393212	0.003856
	GOTERM_BP_FAT	GO:0051240~positive regulation of multicellular organismal process	26	24.7619	1.30234e-05	CSF1R, OXTR, CEBPD, CITED2, PTAFR, IRS2, ATP2A1, ATP1A1, FCNA, ASIC2, NGFR, PTGIS, TRPC3, OSR1, CYBB, FOS, MMP9, AGT, FBXO31, VNN1, WT1, AXL, TMEM119, SGK1, NBL1, PTPN5	96	2127	20051	2.55312	0.0415056	0.00470869	0.00461753
	GOTERM_BP_FAT	GO:0051094~positive regulation of developmental process	23	21.9048	1.49855e-05	NGFR, CSF1R, OXTR, PTGIS, CEBPD, CITED2, OSR1, CYBB, FOS, MMP9, AGT, FBXO31, ZFP36, CCL8, VNN1, FRZB, AXL, WT1, TMEM119, SGK1, ASIC2, NBL1, PTPN5	96	1732	20051	2.77361	0.0476076	0.00487627	0.00478187
	GOTERM_BP_FAT	GO:0010941~regulation of cell death	24	22.8571	2.66607e-05	C1QA, NGFR, CSF1R, PTGIS, CITED2, OSR1, IRS2, FOS, MMP9, AGT, NET1, ZFP36, VNN1, CHST11, RPS29, FRZB, AXL, WT1, TXNIP, PGR, SIK1, SGK1, ASIC2, PTPN5	96	1935	20051	2.59057	0.0831229	0.00788672	0.00773403
	GOTERM_BP_FAT	GO:0051146~striated muscle cell differentiation	10	9.52381	4.07916e-05	ACTA1, CSRP2, CCL8, WT1, TMEM119, LDB3, SIK1, FLNC, MYH4, AGT	96	348	20051	6.00186	0.124342	0.0110613	0.0108472
	GOTERM_BP_FAT	GO:0098656~anion transmembrane transport	8	7.61905	5.27774e-05	ANO1, SLC26A2, OSR1, PTAFR, SLC1A3, IRS2, ANO5, AGT	96	204	20051	8.19077	0.157848	0.0130396	0.0127871
	GOTERM_BP_FAT	GO:0006811~ion transport	22	20.9524	5.61015e-05	KCNK5, SLC26A2, TRPC3, CD300A, OSR1, PTAFR, ATP5K, SLC1A3, CYBB, ATP2A1, IRS2, ATP1A1, MMP9, ANO5, AGT, TRDN, ANO1, CCL8, SIK1, FOLR2, SGK1, ASIC2	96	1749	20051	2.62723	0.166912	0.0130396	0.0127871
	GOTERM_BP_FAT	GO:0008219~cell death	26	24.7619	6.21122e-05	C1QA, CSF1R, CITED2, IRS2, ATP2A1, ZFP36, CHST11, FRZB, SLIT3, ASIC2, NGFR, PTGIS, OSR1, FOS, MMP9, AGT, NET1, VNN1, WT1, RPS29, AXL, TXNIP, SIK1, PGR, SGK1, PTPN5	96	2333	20051	2.32768	0.183053	0.0131322	0.012878
	GOTERM_BP_FAT	GO:0044706~multi-multicellular organism process	9	8.57143	6.45716e-05	OXTR, PTGIS, CITED2, PTAFR, PGR, FOS, MMP9, RXFP1, AGT	96	286	20051	6.57266	0.189568	0.0131322	0.012878
	GOTERM_BP_FAT	GO:0034220~ion transmembrane transport	16	15.2381	7.81051e-05	KCNK5, SLC26A2, TRPC3, OSR1, PTAFR, ATP5K, SLC1A3, ATP2A1, IRS2, ATP1A1, MMP9, ANO5, AGT, TRDN, ANO1, ASIC2	96	1011	20051	3.30547	0.224496	0.0143977	0.014119
	GOTERM_BP_FAT	GO:0009605~response to external stimulus	31	29.5238	7.96431e-05	CSF1R, AHCY, CITED2, SLFN4, SAA3, PTAFR, SLC1A3, ATP1A1, ZFP36, CCL8, TAGAP, SLIT3, ASIC2, NGFR, PTGIS, IL10RA, BMP8A, CYBB, FOS, MMP9, AGT, TRDN, ACTA1, ANO1, AXL, ZYX, IGTP, TXNIP, SIK1, PIK3AP1, NBL1	96	3141	20051	2.06138	0.228369	0.0143977	0.014119
	GOTERM_BP_FAT	GO:0043269~regulation of ion transport	14	13.3333	0.000101441	TRPC3, CD300A, OSR1, PTAFR, CYBB, ATP2A1, IRS2, ATP1A1, MMP9, AGT, TRDN, SIK1, SGK1, ASIC2	96	801	20051	3.65057	0.281224	0.017373	0.0170367
	GOTERM_BP_FAT	GO:0033993~response to lipid	17	16.1905	0.00013133	ERRFI1, OXTR, IL10RA, OSR1, PTAFR, CYBB, FOS, ATP1A1, AGT, ACTA1, ZFP36, AXL, IGTP, TXNIP, PGR, SLIT3, SGK1	96	1184	20051	2.9989	0.347867	0.0213674	0.0209537
	GOTERM_BP_FAT	GO:0042981~regulation of apoptotic process	21	20	0.00014686	NGFR, CSF1R, PTGIS, CITED2, OSR1, IRS2, MMP9, AGT, NET1, ZFP36, VNN1, CHST11, RPS29, FRZB, AXL, WT1, TXNIP, PGR, SIK1, SGK1, ASIC2	96	1730	20051	2.53535	0.380018	0.0227431	0.0223027
	GOTERM_BP_FAT	GO:0006915~apoptotic process	23	21.9048	0.000153764	NGFR, CSF1R, PTGIS, CITED2, OSR1, ATP2A1, IRS2, MMP9, AGT, NET1, ZFP36, VNN1, CHST11, RPS29, FRZB, AXL, WT1, TXNIP, PGR, SLIT3, SIK1, SGK1, ASIC2	96	2021	20051	2.37698	0.393797	0.0227431	0.0223027
	GOTERM_BP_FAT	GO:0043067~regulation of programmed cell death	21	20	0.000176835	NGFR, CSF1R, PTGIS, CITED2, OSR1, IRS2, MMP9, AGT, NET1, ZFP36, VNN1, CHST11, RPS29, FRZB, AXL, WT1, TXNIP, PGR, SIK1, SGK1, ASIC2	96	1754	20051	2.50066	0.43766	0.0245045	0.0240301
	GOTERM_BP_FAT	GO:0045595~regulation of cell differentiation	24	22.8571	0.000180734	NGFR, ERRFI1, CSF1R, CEBPD, OSR1, FOS, MMP9, AGT, APOLD1, FBXO31, MYCL, ZFP36, MAFB, CCL8, VNN1, FRZB, AXL, TMEM119, SIK1, SGK1, MYH4, NBL1, PTPN5, C1QC	96	2191	20051	2.28788	0.444753	0.0245045	0.0240301
	GOTERM_BP_FAT	GO:0030856~regulation of epithelial cell differentiation	7	6.66667	0.000203365	MYCL, ERRFI1, ZFP36, FRZB, OSR1, MMP9, APOLD1	96	178	20051	8.21378	0.484192	0.026036	0.025532
	GOTERM_BP_FAT	GO:0010243~response to organonitrogen compound	16	15.2381	0.000208032	NGFR, ERRFI1, OXTR, TRPC3, PTAFR, SLC1A3, CYBB, ATP2A1, IRS2, FOS, MMP9, AGT, ACTA1, ANO1, PGR, SGK1	96	1105	20051	3.02428	0.49197	0.026036	0.025532
	GOTERM_BP_FAT	GO:0010942~positive regulation of cell death	13	12.381	0.000246446	C1QA, NGFR, PTGIS, FOS, MMP9, AGT, NET1, RPS29, FRZB, WT1, TXNIP, SIK1, PTPN5	96	760	20051	3.57268	0.551694	0.0297013	0.0291263
	GOTERM_BP_FAT	GO:1901700~response to oxygen-containing compound	23	21.9048	0.000271723	NGFR, ERRFI1, OXTR, TRPC3, IL10RA, OSR1, PTAFR, SLC1A3, CYBB, ATP2A1, IRS2, FOS, MMP9, AGT, NET1, ANO1, ZFP36, AXL, IGTP, TXNIP, PGR, SLIT3, SGK1	96	2103	20051	2.2843	0.587112	0.030711	0.0301164
	GOTERM_BP_FAT	GO:0006883~cellular sodium ion homeostasis	4	3.80952	0.000277499	SLC1A3, ATP1A1, SGK1, AGT	96	27	20051	30.9429	0.594804	0.030711	0.0301164
	GOTERM_BP_FAT	GO:0003012~muscle system process	10	9.52381	0.000289252	ACTA1, MYH1, ERRFI1, OXTR, TRPC3, PTAFR, ATP2A1, ATP1A1, MYH4, AGT	96	451	20051	4.63114	0.610017	0.030711	0.0301164
	GOTERM_BP_FAT	GO:0009612~response to mechanical stimulus	8	7.61905	0.000292576	ACTA1, CITED2, SLC1A3, TXNIP, ATP1A1, FOS, ASIC2, AGT	96	269	20051	6.21159	0.614214	0.030711	0.0301164
	GOTERM_BP_FAT	GO:0098660~inorganic ion transmembrane transport	13	12.381	0.000312147	KCNK5, SLC26A2, TRPC3, OSR1, PTAFR, ATP5K, SLC1A3, ATP2A1, ATP1A1, ANO5, TRDN, ANO1, ASIC2	96	780	20051	3.48108	0.638031	0.0317414	0.0311269
	GOTERM_BP_FAT	GO:0030239~myofibril assembly	5	4.7619	0.00036037	ACTA1, CSRP2, LDB3, FLNC, MYH4	96	71	20051	14.7088	0.69063	0.0347909	0.0341174
	GOTERM_BP_FAT	GO:0012501~programmed cell death	23	21.9048	0.000363519	NGFR, CSF1R, PTGIS, CITED2, OSR1, ATP2A1, IRS2, MMP9, AGT, NET1, ZFP36, VNN1, CHST11, RPS29, FRZB, AXL, WT1, TXNIP, PGR, SLIT3, SIK1, SGK1, ASIC2	96	2147	20051	2.23749	0.693786	0.0347909	0.0341174
	GOTERM_BP_FAT	GO:0051241~negative regulation of multicellular organismal process	18	17.1429	0.00039066	NGFR, ERRFI1, OXTR, CITED2, WWC1, OSR1, ATP2A1, PRG4, ATP1A1, MMP9, AGT, ZFP36, MAFB, FRZB, AXL, WT1, TMEM119, C1QC	96	1439	20051	2.61262	0.719686	0.0363202	0.035617
	GOTERM_BP_FAT	GO:0031960~response to corticosteroid	7	6.66667	0.00043335	ERRFI1, ZFP36, PTAFR, CYBB, SLIT3, FOS, SGK1	96	205	20051	7.13196	0.756067	0.0382159	0.037476
	GOTERM_BP_FAT	GO:0042127~regulation of cell proliferation	21	20	0.000444192	NGFR, ERRFI1, CSF1R, CITED2, CD300A, OSR1, PTAFR, IRS2, PRG4, MMP9, AGT, RERG, ZFP36, CHST11, FRZB, WT1, TMEM119, TXNIP, PGR, SLIT3, FOLR2	96	1881	20051	2.33182	0.764529	0.0382159	0.037476
	GOTERM_BP_FAT	GO:0009887~animal organ morphogenesis	16	15.2381	0.000446282	NGFR, ERRFI1, EMX2, CITED2, OSR1, AGT, ACTA1, MAFB, CHST11, FRZB, WT1, TMEM119, PGR, SLIT3, RPL38, NBL1	96	1187	20051	2.81536	0.766126	0.0382159	0.037476
	GOTERM_BP_FAT	GO:0042493~response to drug	10	9.52381	0.000462166	EMX2, OXTR, SLC1A3, CYBB, TXNIP, ATP1A1, FOS, ASIC2, MMP9, PTPN5	96	481	20051	4.3423	0.777916	0.0385613	0.0378147
	GOTERM_BP_FAT	GO:0098661~inorganic anion transmembrane transport	5	4.7619	0.000491166	ANO1, SLC26A2, PTAFR, SLC1A3, ANO5	96	77	20051	13.5626	0.797929	0.0399563	0.0391827
	GOTERM_BP_FAT	GO:1903959~regulation of anion transmembrane transport	4	3.80952	0.000507075	OSR1, PTAFR, IRS2, AGT	96	33	20051	25.3169	0.808132	0.0402444	0.0394653
	GOTERM_BP_FAT	GO:0014070~response to organic cyclic compound	16	15.2381	0.000526897	ERRFI1, OXTR, TRPC3, SAA3, PTAFR, SLC1A3, CYBB, FOS, ATP1A1, AGT, ACTA1, ZFP36, TXNIP, PGR, SLIT3, SGK1	96	1206	20051	2.77101	0.820127	0.0408081	0.0400181
	GOTERM_BP_FAT	GO:1901654~response to ketone	8	7.61905	0.000551213	ERRFI1, OXTR, PTAFR, CYBB, TXNIP, SLIT3, FOS, SGK1	96	299	20051	5.58835	0.833821	0.0408081	0.0400181
	GOTERM_BP_FAT	GO:0055085~transmembrane transport	17	16.1905	0.000562837	KCNK5, SLC26A2, TRPC3, OSR1, PTAFR, ATP5K, SLC1A3, CYBB, ATP2A1, IRS2, ATP1A1, MMP9, ANO5, AGT, TRDN, ANO1, ASIC2	96	1348	20051	2.63405	0.839995	0.0408081	0.0400181
	GOTERM_BP_FAT	GO:0035556~intracellular signal transduction	26	24.7619	0.000581734	ERRFI1, CSF1R, OXTR, WWC1, SAA3, PTAFR, ATP2A1, RERG, ZFP36, CCL8, NGFR, CD300A, IL10RA, PTPN13, MMP9, AGT, TRDN, NET1, VNN1, RASA3, AXL, IGTP, SIK1, PIK3AP1, SGK1, PTPN5	96	2689	20051	2.01952	0.849546	0.0408081	0.0400181
	GOTERM_BP_FAT	GO:0048584~positive regulation of response to stimulus	26	24.7619	0.000581734	C1QB, C1QA, CSF1R, CITED2, WWC1, PTAFR, FCNA, CCL8, IFI208, NGFR, FYB2, PTGIS, TRPC3, CD300A, IL10RA, BMP8A, MMP9, AGT, TRDN, NET1, ANO1, AXL, IGTP, PIK3AP1, PTPN5, C1QC	96	2689	20051	2.01952	0.849546	0.0408081	0.0400181
	GOTERM_BP_FAT	GO:0032870~cellular response to hormone stimulus	11	10.4762	0.000594227	ERRFI1, ZFP36, WT1, SLIT3, IRS2, PGR, ATP1A1, FOS, SGK1, RXFP1, AGT	96	606	20051	3.79127	0.855544	0.0408081	0.0400181
	GOTERM_BP_FAT	GO:0098883~synapse disassembly	3	2.85714	0.000610514	C1QB, C1QA, C1QC	96	8	20051	78.3242	0.863008	0.0408081	0.0400181
	GOTERM_BP_FAT	GO:0006812~cation transport	16	15.2381	0.000614505	KCNK5, TRPC3, CD300A, OSR1, ATP5K, SLC1A3, ATP2A1, ATP1A1, MMP9, AGT, TRDN, ANO1, CCL8, SIK1, SGK1, ASIC2	96	1224	20051	2.73026	0.864777	0.0408081	0.0400181
	GOTERM_BP_FAT	GO:0007167~enzyme linked receptor protein signaling pathway	14	13.3333	0.000664198	NGFR, ERRFI1, CSF1R, CITED2, BMP8A, IRS2, FOS, MMP9, AGT, CHST11, AXL, ZYX, TXNIP, NBL1	96	973	20051	3.00525	0.884984	0.043226	0.0423891
	GOTERM_BP_FAT	GO:0016051~carbohydrate biosynthetic process	7	6.66667	0.000707081	ISYNA1, CHST11, B3GALT2, PTAFR, IRS2, SIK1, ST6GALNAC5	96	225	20051	6.49801	0.899978	0.0451145	0.0442411
	GOTERM_BP_FAT	GO:0048646~anatomical structure formation involved in morphogenesis	16	15.2381	0.000926138	NGFR, PTGIS, CITED2, OSR1, CYBB, LDB3, MMP9, AGT, APOLD1, ACTA1, CSRP2, MAFB, CCL8, WT1, FLNC, MYH4	96	1274	20051	2.6231	0.951002	0.0575056	0.0563922
	GOTERM_BP_FAT	GO:0006952~defense response	21	20	0.000960407	C1QB, IFI208, C1QA, CSF1R, AHCY, PTGIS, CD300A, SAA3, PTAFR, CYBB, AGT, FCNA, ZFP36, CCL8, VNN1, AXL, TAGAP, ZYX, IGTP, PIK3AP1, C1QC	96	1999	20051	2.19418	0.956178	0.0575056	0.0563922
	GOTERM_BP_FAT	GO:1901698~response to nitrogen compound	16	15.2381	0.00096364	NGFR, ERRFI1, OXTR, TRPC3, PTAFR, SLC1A3, CYBB, ATP2A1, IRS2, FOS, MMP9, AGT, ACTA1, ANO1, PGR, SGK1	96	1279	20051	2.61285	0.956638	0.0575056	0.0563922
	GOTERM_BP_FAT	GO:0042692~muscle cell differentiation	10	9.52381	0.000971975	ACTA1, CSRP2, CCL8, WT1, TMEM119, LDB3, SIK1, FLNC, MYH4, AGT	96	534	20051	3.91132	0.957799	0.0575056	0.0563922
	GOTERM_BP_FAT	GO:0061061~muscle structure development	12	11.4286	0.00120832	ACTA1, CSRP2, CCL8, CITED2, WT1, TMEM119, LDB3, SIK1, FOS, FLNC, MYH4, AGT	96	785	20051	3.19283	0.980463	0.0702121	0.0688527
	GOTERM_BP_FAT	GO:0002684~positive regulation of immune system process	16	15.2381	0.00130305	C1QB, IFI208, C1QA, CSF1R, FYB2, CD300A, PTAFR, IRS2, FOS, MMP9, FCNA, VNN1, AXL, IGTP, PIK3AP1, C1QC	96	1318	20051	2.53553	0.985653	0.0736309	0.0722053
	GOTERM_BP_FAT	GO:0007565~female pregnancy	7	6.66667	0.00132194	OXTR, PTGIS, CITED2, PGR, FOS, MMP9, AGT	96	254	20051	5.75611	0.98651	0.0736309	0.0722053
	GOTERM_BP_FAT	GO:1901652~response to peptide	10	9.52381	0.00133618	NGFR, ERRFI1, ANO1, OXTR, CYBB, ATP2A1, IRS2, SGK1, MMP9, AGT	96	559	20051	3.7364	0.987121	0.0736309	0.0722053
	GOTERM_BP_FAT	GO:0010647~positive regulation of cell communication	21	20	0.00135767	NGFR, CSF1R, OXTR, PTGIS, CITED2, CD300A, WWC1, IL10RA, BMP8A, SLC1A3, IRS2, MMP9, AGT, TRDN, NET1, ANO1, CCL8, AXL, IGTP, PIK3AP1, PTPN5	96	2056	20051	2.13334	0.987992	0.0736309	0.0722053
	GOTERM_BP_FAT	GO:0023056~positive regulation of signaling	21	20	0.00142342	NGFR, CSF1R, OXTR, PTGIS, CITED2, CD300A, WWC1, IL10RA, BMP8A, SLC1A3, IRS2, MMP9, AGT, TRDN, NET1, ANO1, CCL8, AXL, IGTP, PIK3AP1, PTPN5	96	2064	20051	2.12508	0.990309	0.0759313	0.0744612
	GOTERM_BP_FAT	GO:0043066~negative regulation of apoptotic process	14	13.3333	0.00164581	NGFR, CSF1R, CITED2, OSR1, IRS2, MMP9, AGT, VNN1, CHST11, AXL, WT1, PGR, SGK1, ASIC2	96	1075	20051	2.7201	0.995306	0.0863786	0.0847062
	GOTERM_BP_FAT	GO:0030855~epithelial cell differentiation	12	11.4286	0.00169312	MYCL, ERRFI1, ZFP36, MAFB, FRZB, WT1, OSR1, TXNIP, PGR, MMP9, AGT, APOLD1	96	819	20051	3.06029	0.995977	0.0874508	0.0857577
	GOTERM_BP_FAT	GO:0051384~response to glucocorticoid	6	5.71429	0.00179017	ERRFI1, ZFP36, PTAFR, SLIT3, FOS, SGK1	96	183	20051	6.84802	0.997068	0.0897206	0.0879836
	GOTERM_BP_FAT	GO:0043583~ear development	7	6.66667	0.00183585	C1QB, MYCL, MAFB, CEBPD, FRZB, OSR1, RPL38	96	271	20051	5.39503	0.997474	0.0897206	0.0879836
	GOTERM_BP_FAT	GO:0090257~regulation of muscle system process	7	6.66667	0.00183585	ERRFI1, OXTR, TRPC3, PTAFR, ATP2A1, ATP1A1, AGT	96	271	20051	5.39503	0.997474	0.0897206	0.0879836
	GOTERM_BP_FAT	GO:0045926~negative regulation of growth	7	6.66667	0.0018702	CITED2, FRZB, WT1, WWC1, SLIT3, AGT, RERG	96	272	20051	5.37519	0.997742	0.0897206	0.0879836
	GOTERM_BP_FAT	GO:0002682~regulation of immune system process	19	18.0952	0.00187492	C1QB, IFI208, C1QA, CSF1R, FYB2, CD300A, PTAFR, IRS2, FOS, MMP9, FCNA, ZFP36, MAFB, VNN1, AXL, IGTP, PIK3AP1, NBL1, C1QC	96	1806	20051	2.19736	0.997776	0.0897206	0.0879836
	GOTERM_BP_FAT	GO:0007567~parturition	3	2.85714	0.00194775	OXTR, PTAFR, RXFP1	96	14	20051	44.7567	0.998246	0.0907995	0.0890415
	GOTERM_BP_FAT	GO:0043069~negative regulation of programmed cell death	14	13.3333	0.00195328	NGFR, CSF1R, CITED2, OSR1, IRS2, MMP9, AGT, VNN1, CHST11, AXL, WT1, PGR, SGK1, ASIC2	96	1096	20051	2.66798	0.998278	0.0907995	0.0890415
	GOTERM_BP_FAT	GO:0045597~positive regulation of cell differentiation	15	14.2857	0.00198453	NGFR, CSF1R, CEBPD, FOS, AGT, FBXO31, ZFP36, CCL8, VNN1, FRZB, AXL, TMEM119, SGK1, NBL1, PTPN5	96	1235	20051	2.53682	0.998445	0.090953	0.089192
	GOTERM_BP_FAT	GO:0055002~striated muscle cell development	6	5.71429	0.00230861	ACTA1, CSRP2, LDB3, FLNC, MYH4, AGT	96	194	20051	6.45973	0.99946	0.104336	0.102316
	GOTERM_BP_FAT	GO:0045933~positive regulation of muscle contraction	4	3.80952	0.00250512	OXTR, PTAFR, ATP2A1, ATP1A1	96	57	20051	14.6572	0.999715	0.110479	0.10834
	GOTERM_BP_FAT	GO:0045087~innate immune response	14	13.3333	0.00251243	C1QB, IFI208, C1QA, CSF1R, CD300A, CYBB, FCNA, CCL8, VNN1, AXL, ZYX, IGTP, PIK3AP1, C1QC	96	1128	20051	2.59229	0.999722	0.110479	0.10834
	GOTERM_BP_FAT	GO:0072359~circulatory system development	15	14.2857	0.00264142	NGFR, ERRFI1, OXTR, PTGIS, CITED2, OSR1, HSPB7, CYBB, LDB3, MMP9, AGT, APOLD1, WT1, SLIT3, SIK1	96	1274	20051	2.45916	0.999818	0.112459	0.110282
	GOTERM_BP_FAT	GO:0009266~response to temperature stimulus	6	5.71429	0.00269081	NGFR, ANO1, RASA3, HSPB7, FOS, AGT	96	201	20051	6.23476	0.999845	0.112459	0.110282
	GOTERM_BP_FAT	GO:0006954~inflammatory response	11	10.4762	0.00269374	CSF1R, ZFP36, CCL8, AHCY, PTGIS, VNN1, CD300A, AXL, SAA3, PTAFR, CYBB	96	742	20051	3.09638	0.999846	0.112459	0.110282
	GOTERM_BP_FAT	GO:0016477~cell migration	17	16.1905	0.0026957	NGFR, CSF1R, EMX2, CITED2, CD300A, WWC1, SAA3, PTAFR, IRS2, MMP9, AGT, FBXO31, NET1, CCL8, AXL, PGR, NBL1	96	1566	20051	2.26737	0.999847	0.112459	0.110282
	GOTERM_BP_FAT	GO:0060537~muscle tissue development	9	8.57143	0.00277607	ACTA1, CSRP2, CITED2, WT1, OSR1, SIK1, FOS, MYH4, AGT	96	506	20051	3.71498	0.999882	0.114346	0.112132
	GOTERM_BP_FAT	GO:0031032~actomyosin structure organization	6	5.71429	0.00292877	ACTA1, CSRP2, ZYX, LDB3, FLNC, MYH4	96	205	20051	6.11311	0.999929	0.117742	0.115463
	GOTERM_BP_FAT	GO:0051049~regulation of transport	20	19.0476	0.00293089	OXTR, TRPC3, CD300A, OSR1, PTAFR, BMP8A, CYBB, ATP2A1, IRS2, STON2, ATP1A1, MMP9, AGT, TRDN, ANO1, AXL, SIK1, SGK1, ASIC2, PTPN5	96	2036	20051	2.05171	0.999929	0.117742	0.115463
	GOTERM_BP_FAT	GO:0055078~sodium ion homeostasis	4	3.80952	0.00303957	SLC1A3, ATP1A1, SGK1, AGT	96	61	20051	13.696	0.99995	0.120619	0.118284
	GOTERM_BP_FAT	GO:0010927~cellular component assembly involved in morphogenesis	5	4.7619	0.00313361	ACTA1, CSRP2, LDB3, FLNC, MYH4	96	127	20051	8.22302	0.999963	0.122853	0.120474
	GOTERM_BP_FAT	GO:0090185~negative regulation of kidney development	3	2.85714	0.00323465	WT1, OSR1, MMP9	96	18	20051	34.8108	0.999974	0.124871	0.122454
	GOTERM_BP_FAT	GO:0048468~cell development	24	22.8571	0.00326185	C1QA, NGFR, CSF1R, CITED2, OSR1, BMP8A, SLC1A3, LDB3, AGT, FBXO31, ACTA1, MYCL, CSRP2, CHST11, FRZB, AXL, WT1, PGR, SLIT3, FLNC, SGK1, MYH4, NBL1, PTPN5	96	2700	20051	1.85657	0.999976	0.124871	0.122454
	GOTERM_BP_FAT	GO:0090183~regulation of kidney development	4	3.80952	0.00333104	WT1, OSR1, MMP9, AGT	96	63	20051	13.2612	0.999981	0.126037	0.123597
	GOTERM_BP_FAT	GO:1901701~cellular response to oxygen-containing compound	16	15.2381	0.00339914	NGFR, ERRFI1, OSR1, PTAFR, SLC1A3, CYBB, IRS2, FOS, MMP9, AGT, NET1, ANO1, ZFP36, AXL, IGTP, SGK1	96	1455	20051	2.29679	0.999985	0.126983	0.124525
	GOTERM_BP_FAT	GO:0048771~tissue remodeling	6	5.71429	0.00344983	CSF1R, AXL, TMEM119, P3H4, MMP9, AGT	96	213	20051	5.88351	0.999987	0.126983	0.124525
	GOTERM_BP_FAT	GO:0034765~regulation of ion transmembrane transport	9	8.57143	0.00347311	OSR1, PTAFR, CYBB, ATP2A1, IRS2, ASIC2, MMP9, AGT, TRDN	96	525	20051	3.58054	0.999988	0.126983	0.124525
	GOTERM_BP_FAT	GO:0048511~rhythmic process	8	7.61905	0.00353821	NGFR, OXTR, AHCY, AXL, SLIT3, SIK1, PGR, AGT	96	414	20051	4.03603	0.99999	0.127926	0.125449
	GOTERM_BP_FAT	GO:0034097~response to cytokine	14	13.3333	0.00402887	IFI208, CSF1R, OXTR, PTGIS, SAA3, IL10RA, FOS, ZFP36, CCL8, AXL, SPOCK2, ZYX, IGTP, SLIT3	96	1192	20051	2.45311	0.999998	0.144065	0.141276
	GOTERM_BP_FAT	GO:0034762~regulation of transmembrane transport	9	8.57143	0.00415974	OSR1, PTAFR, CYBB, ATP2A1, IRS2, ASIC2, MMP9, AGT, TRDN	96	541	20051	3.47464	0.999999	0.146545	0.143707
	GOTERM_BP_FAT	GO:0042592~homeostatic process	20	19.0476	0.00423956	NGFR, CSF1R, OXTR, TRPC3, CITED2, BMP8A, SLC1A3, ATP2A1, IRS2, ATP1A1, AGT, TRDN, ANO1, ZFP36, MAFB, CCL8, AXL, TMEM119, CAR12, SGK1	96	2105	20051	1.98446	0.999999	0.146545	0.143707
	GOTERM_BP_FAT	GO:0030001~metal ion transport	12	11.4286	0.00427835	KCNK5, CCL8, TRPC3, OSR1, SLC1A3, ATP2A1, SIK1, ATP1A1, SGK1, ASIC2, AGT, TRDN	96	924	20051	2.71253	0.999999	0.146545	0.143707
	GOTERM_BP_FAT	GO:0055082~cellular chemical homeostasis	12	11.4286	0.00427835	NGFR, ANO1, OXTR, CCL8, TRPC3, SLC1A3, ATP2A1, IRS2, ATP1A1, SGK1, AGT, TRDN	96	924	20051	2.71253	0.999999	0.146545	0.143707
	GOTERM_BP_FAT	GO:0006936~muscle contraction	7	6.66667	0.00443319	MYH1, OXTR, PTAFR, ATP2A1, ATP1A1, MYH4, AGT	96	324	20051	4.51251	0.999999	0.148836	0.145954
	GOTERM_BP_FAT	GO:0042698~ovulation cycle	5	4.7619	0.00443671	OXTR, AXL, SLIT3, PGR, AGT	96	140	20051	7.45945	0.999999	0.148836	0.145954
	GOTERM_BP_FAT	GO:0055001~muscle cell development	6	5.71429	0.00460166	ACTA1, CSRP2, LDB3, FLNC, MYH4, AGT	96	228	20051	5.49644	1	0.152794	0.149836
	GOTERM_BP_FAT	GO:0051674~localization of cell	18	17.1429	0.00500237	NGFR, CSF1R, EMX2, CITED2, CD300A, WWC1, SAA3, PTAFR, IRS2, MMP9, AGT, FBXO31, NET1, CCL8, AXL, WT1, PGR, NBL1	96	1822	20051	2.06343	1	0.162777	0.159626
	GOTERM_BP_FAT	GO:0048870~cell motility	18	17.1429	0.00500237	NGFR, CSF1R, EMX2, CITED2, CD300A, WWC1, SAA3, PTAFR, IRS2, MMP9, AGT, FBXO31, NET1, CCL8, AXL, WT1, PGR, NBL1	96	1822	20051	2.06343	1	0.162777	0.159626
	GOTERM_BP_FAT	GO:0043065~positive regulation of apoptotic process	10	9.52381	0.00508459	NET1, NGFR, PTGIS, RPS29, FRZB, WT1, TXNIP, SIK1, MMP9, AGT	96	683	20051	3.05805	1	0.163814	0.160643
	GOTERM_BP_FAT	GO:0060548~negative regulation of cell death	14	13.3333	0.00530726	NGFR, CSF1R, CITED2, OSR1, IRS2, MMP9, AGT, VNN1, CHST11, AXL, WT1, PGR, SGK1, ASIC2	96	1232	20051	2.37346	1	0.165693	0.162485
	GOTERM_BP_FAT	GO:0043068~positive regulation of programmed cell death	10	9.52381	0.00532799	NET1, NGFR, PTGIS, RPS29, FRZB, WT1, TXNIP, SIK1, MMP9, AGT	96	688	20051	3.03582	1	0.165693	0.162485
	GOTERM_BP_FAT	GO:0010646~regulation of cell communication	29	27.619	0.0053411	ERRFI1, CSF1R, OXTR, CITED2, WWC1, SLC1A3, IRS2, CCL8, CHST11, FRZB, SLIT3, NGFR, PTGIS, CD300A, IL10RA, BMP8A, PTPN13, MMP9, AGT, TRDN, NET1, ANO1, VNN1, RASA3, AXL, IGTP, PIK3AP1, NBL1, PTPN5	96	3671	20051	1.64998	1	0.165693	0.162485
	GOTERM_BP_FAT	GO:0007423~sensory organ development	10	9.52381	0.00537774	C1QB, MYCL, MAFB, CEBPD, BNC2, CITED2, FRZB, WT1, OSR1, RPL38	96	689	20051	3.03142	1	0.165693	0.162485
	GOTERM_BP_FAT	GO:0015698~inorganic anion transport	5	4.7619	0.00539749	ANO1, SLC26A2, PTAFR, SLC1A3, ANO5	96	148	20051	7.05624	1	0.165693	0.162485
	GOTERM_BP_FAT	GO:0006468~protein phosphorylation	19	18.0952	0.00556702	NGFR, ERRFI1, CSF1R, OXTR, CD300A, WWC1, SAA3, BMP8A, PTPN13, MMP9, AGT, ZFP36, CCL8, AXL, IGTP, TMEM119, SIK1, SGK1, PTPN5	96	1999	20051	1.98521	1	0.1693	0.166022
	GOTERM_BP_FAT	GO:0010035~response to inorganic substance	10	9.52381	0.00563194	NET1, ACTA1, C1QA, TRPC3, AXL, SLC1A3, CYBB, TXNIP, FOS, MMP9	96	694	20051	3.00958	1	0.169682	0.166397
	GOTERM_BP_FAT	GO:0007507~heart development	10	9.52381	0.00568388	OXTR, CITED2, WT1, OSR1, HSPB7, LDB3, SLIT3, SIK1, MMP9, AGT	96	695	20051	3.00525	1	0.169682	0.166397
	GOTERM_BP_FAT	GO:0032844~regulation of homeostatic process	9	8.57143	0.00578485	CSF1R, NGFR, ANO1, ZFP36, MAFB, TRPC3, TMEM119, AGT, TRDN	96	572	20051	3.28633	1	0.171126	0.167813
	GOTERM_BP_FAT	GO:0023051~regulation of signaling	29	27.619	0.00585613	ERRFI1, CSF1R, OXTR, CITED2, WWC1, SLC1A3, IRS2, CCL8, CHST11, FRZB, SLIT3, NGFR, PTGIS, CD300A, IL10RA, BMP8A, PTPN13, MMP9, AGT, TRDN, NET1, ANO1, VNN1, RASA3, AXL, IGTP, PIK3AP1, NBL1, PTPN5	96	3695	20051	1.63926	1	0.171674	0.168351
	GOTERM_BP_FAT	GO:0008283~cell proliferation	20	19.0476	0.00597552	NGFR, ERRFI1, CSF1R, EMX2, CITED2, CD300A, OSR1, PTAFR, IRS2, PRG4, MMP9, AGT, RERG, ZFP36, FRZB, WT1, TMEM119, PGR, SLIT3, FOLR2	96	2173	20051	1.92236	1	0.17361	0.170249
	GOTERM_BP_FAT	GO:0045937~positive regulation of phosphate metabolic process	14	13.3333	0.00621964	NGFR, CSF1R, CD300A, WWC1, PTAFR, BMP8A, MMP9, RXFP1, AGT, CCL8, AXL, IGTP, TMEM119, PTPN5	96	1256	20051	2.32811	1	0.177533	0.174095
	GOTERM_BP_FAT	GO:0010562~positive regulation of phosphorus metabolic process	14	13.3333	0.00621964	NGFR, CSF1R, CD300A, WWC1, PTAFR, BMP8A, MMP9, RXFP1, AGT, CCL8, AXL, IGTP, TMEM119, PTPN5	96	1256	20051	2.32811	1	0.177533	0.174095
	GOTERM_BP_FAT	GO:0098655~cation transmembrane transport	11	10.4762	0.00636684	KCNK5, TRPC3, OSR1, ATP5K, SLC1A3, ATP2A1, ATP1A1, ASIC2, MMP9, AGT, TRDN	96	839	20051	2.73839	1	0.180154	0.176666
	GOTERM_BP_FAT	GO:0071417~cellular response to organonitrogen compound	10	9.52381	0.00656667	ACTA1, NGFR, ERRFI1, ANO1, PTAFR, SLC1A3, CYBB, IRS2, SGK1, AGT	96	711	20051	2.93762	1	0.184206	0.18064
	GOTERM_BP_FAT	GO:0010959~regulation of metal ion transport	8	7.61905	0.00699386	TRPC3, OSR1, ATP2A1, SIK1, ATP1A1, SGK1, AGT, TRDN	96	470	20051	3.55514	1	0.194513	0.190747
	GOTERM_BP_FAT	GO:0007548~sex differentiation	7	6.66667	0.00781132	CITED2, AXL, WT1, OSR1, SLIT3, PGR, AGT	96	365	20051	4.00562	1	0.211828	0.207726
	GOTERM_BP_FAT	GO:0044703~multi-organism reproductive process	15	14.2857	0.00789271	OXTR, PTGIS, TRPC3, CITED2, PTAFR, BMP8A, FOS, MMP9, RXFP1, AGT, AXL, WT1, TMEM119, PGR, FOLR2	96	1443	20051	2.17115	1	0.211828	0.207726
	GOTERM_BP_FAT	GO:0043270~positive regulation of ion transport	7	6.66667	0.00791183	TRPC3, PTAFR, ATP2A1, SGK1, ASIC2, AGT, TRDN	96	366	20051	3.99468	1	0.211828	0.207726
	GOTERM_BP_FAT	GO:0045682~regulation of epidermis development	4	3.80952	0.00793894	NGFR, MYCL, ERRFI1, ZFP36	96	86	20051	9.71463	1	0.211828	0.207726
	GOTERM_BP_FAT	GO:0040011~locomotion	19	18.0952	0.0079789	NGFR, CSF1R, EMX2, CITED2, CD300A, WWC1, SAA3, PTAFR, IRS2, MMP9, AGT, FBXO31, NET1, CCL8, AXL, WT1, PGR, SLIT3, NBL1	96	2071	20051	1.91619	1	0.211828	0.207726
	GOTERM_BP_FAT	GO:0009991~response to extracellular stimulus	9	8.57143	0.008007	ACTA1, ZFP36, AHCY, AXL, BMP8A, CYBB, SIK1, FOS, MMP9	96	605	20051	3.10708	1	0.211828	0.207726
	GOTERM_BP_FAT	GO:0010648~negative regulation of cell communication	15	14.2857	0.00856084	NGFR, ERRFI1, CD300A, WWC1, BMP8A, MMP9, AGT, VNN1, CHST11, RASA3, FRZB, SLIT3, PIK3AP1, NBL1, PTPN5	96	1457	20051	2.15029	1	0.218633	0.2144
	GOTERM_BP_FAT	GO:0009968~negative regulation of signal transduction	14	13.3333	0.00857707	NGFR, ERRFI1, CD300A, WWC1, MMP9, AGT, VNN1, CHST11, RASA3, FRZB, SLIT3, PIK3AP1, NBL1, PTPN5	96	1307	20051	2.23726	1	0.218633	0.2144
	GOTERM_BP_FAT	GO:0071363~cellular response to growth factor stimulus	10	9.52381	0.00864677	NGFR, ERRFI1, ZFP36, CHST11, CITED2, BMP8A, ZYX, FOS, NBL1, AGT	96	743	20051	2.8111	1	0.218633	0.2144
	GOTERM_BP_FAT	GO:0009966~regulation of signal transduction	25	23.8095	0.00866928	ERRFI1, CSF1R, CITED2, WWC1, CCL8, CHST11, FRZB, SLIT3, NGFR, PTGIS, CD300A, IL10RA, BMP8A, PTPN13, MMP9, AGT, TRDN, NET1, VNN1, RASA3, AXL, IGTP, PIK3AP1, NBL1, PTPN5	96	3096	20051	1.68657	1	0.218633	0.2144
	GOTERM_BP_FAT	GO:0046660~female sex differentiation	5	4.7619	0.00873273	AXL, WT1, SLIT3, PGR, AGT	96	170	20051	6.14308	1	0.218633	0.2144
	GOTERM_BP_FAT	GO:0023057~negative regulation of signaling	15	14.2857	0.0087598	NGFR, ERRFI1, CD300A, WWC1, BMP8A, MMP9, AGT, VNN1, CHST11, RASA3, FRZB, SLIT3, PIK3AP1, NBL1, PTPN5	96	1461	20051	2.1444	1	0.218633	0.2144
	GOTERM_BP_FAT	GO:0055067~monovalent inorganic cation homeostasis	5	4.7619	0.00891009	SLC1A3, ATP1A1, CAR12, SGK1, AGT	96	171	20051	6.10715	1	0.218633	0.2144
	GOTERM_BP_FAT	GO:0044057~regulation of system process	9	8.57143	0.00895707	NGFR, ERRFI1, OXTR, TRPC3, PTAFR, ATP2A1, ATP1A1, ASIC2, AGT	96	617	20051	3.04665	1	0.218633	0.2144
	GOTERM_BP_FAT	GO:0019725~cellular homeostasis	12	11.4286	0.00897854	NGFR, ANO1, OXTR, CCL8, TRPC3, SLC1A3, ATP2A1, IRS2, ATP1A1, SGK1, AGT, TRDN	96	1023	20051	2.45002	1	0.218633	0.2144
	GOTERM_BP_FAT	GO:0022603~regulation of anatomical structure morphogenesis	13	12.381	0.0089796	NGFR, CSF1R, PTGIS, CITED2, OSR1, CYBB, MMP9, AGT, FBXO31, CCL8, WT1, SGK1, MYH4	96	1167	20051	2.32668	1	0.218633	0.2144
	GOTERM_BP_FAT	GO:0048585~negative regulation of response to stimulus	17	16.1905	0.00900331	NGFR, ERRFI1, PTGIS, CD300A, WWC1, MMP9, AGT, ZFP36, VNN1, CHST11, RASA3, FRZB, AXL, SLIT3, PIK3AP1, NBL1, PTPN5	96	1776	20051	1.99927	1	0.218633	0.2144
	GOTERM_BP_FAT	GO:0021675~nerve development	4	3.80952	0.00926574	NGFR, MAFB, CITED2, SLC1A3	96	91	20051	9.18086	1	0.223339	0.219015
	GOTERM_BP_FAT	GO:0035802~adrenal cortex formation	2	1.90476	0.00945362	CITED2, WT1	96	2	20051	208.865	1	0.224541	0.220194
	GOTERM_BP_FAT	GO:0072166~posterior mesonephric tubule development	2	1.90476	0.00945362	WT1, OSR1	96	2	20051	208.865	1	0.224541	0.220194
	GOTERM_BP_FAT	GO:0006928~movement of cell or subcellular component	20	19.0476	0.00973654	NGFR, CSF1R, EMX2, CITED2, CD300A, WWC1, SAA3, PTAFR, IRS2, ATP1A1, MMP9, AGT, FBXO31, NET1, CCL8, AXL, WT1, PGR, SLIT3, NBL1	96	2277	20051	1.83456	1	0.229585	0.22514
	GOTERM_BP_FAT	GO:0051348~negative regulation of transferase activity	6	5.71429	0.0101042	ERRFI1, ZFP36, CD300A, IRS2, PTPN5, AGT	96	276	20051	4.54053	1	0.23654	0.231961
	GOTERM_BP_FAT	GO:0006820~anion transport	9	8.57143	0.0103526	ANO1, SLC26A2, OSR1, PTAFR, SLC1A3, IRS2, FOLR2, ANO5, AGT	96	633	20051	2.96964	1	0.240357	0.235704
	GOTERM_BP_FAT	GO:2000243~positive regulation of reproductive process	4	3.80952	0.010415	OXTR, CITED2, WT1, PTAFR	96	95	20051	8.7943	1	0.240357	0.235704
	GOTERM_BP_FAT	GO:0071214~cellular response to abiotic stimulus	7	6.66667	0.0104901	NET1, ERRFI1, PTAFR, ATP1A1, ASIC2, MMP9, AGT	96	389	20051	3.75849	1	0.240387	0.235733
	GOTERM_BP_FAT	GO:0002244~hematopoietic progenitor cell differentiation	5	4.7619	0.0108143	CSF1R, ZFP36, CEBPD, CITED2, STON2	96	181	20051	5.76974	1	0.246083	0.241319
	GOTERM_BP_FAT	GO:0050801~ion homeostasis	11	10.4762	0.0109473	NGFR, OXTR, CCL8, TRPC3, SLC1A3, ATP2A1, ATP1A1, CAR12, SGK1, AGT, TRDN	96	910	20051	2.52474	1	0.247346	0.242558
	GOTERM_BP_FAT	GO:0070848~response to growth factor	10	9.52381	0.0110219	NGFR, ERRFI1, ZFP36, CHST11, CITED2, BMP8A, ZYX, FOS, NBL1, AGT	96	773	20051	2.702	1	0.247346	0.242558
	GOTERM_BP_FAT	GO:0006875~cellular metal ion homeostasis	9	8.57143	0.0111082	OXTR, CCL8, TRPC3, SLC1A3, ATP2A1, ATP1A1, SGK1, AGT, TRDN	96	641	20051	2.93258	1	0.247577	0.242784
	GOTERM_BP_FAT	GO:0006955~immune response	19	18.0952	0.0114911	C1QB, IFI208, C1QA, CSF1R, FYB2, AHCY, CD300A, PTAFR, CYBB, PRG4, FCNA, CCL8, VNN1, AXL, ZYX, IGTP, IGKV1-110, PIK3AP1, C1QC	96	2149	20051	1.84664	1	0.254368	0.249444
	GOTERM_BP_FAT	GO:0071345~cellular response to cytokine stimulus	12	11.4286	0.0117477	IFI208, CSF1R, ZFP36, CCL8, PTGIS, AXL, SAA3, SPOCK2, IL10RA, IGTP, ZYX, SLIT3	96	1063	20051	2.35783	1	0.258044	0.253048
	GOTERM_BP_FAT	GO:0008406~gonad development	6	5.71429	0.0118158	CITED2, WT1, OSR1, SLIT3, PGR, AGT	96	287	20051	4.36651	1	0.258044	0.253048
	GOTERM_BP_FAT	GO:0071276~cellular response to cadmium ion	3	2.85714	0.0119394	CYBB, FOS, MMP9	96	35	20051	17.9027	1	0.259005	0.25399
	GOTERM_BP_FAT	GO:0007166~cell surface receptor signaling pathway	23	21.9048	0.0121742	NGFR, ERRFI1, CSF1R, FYB2, CITED2, CD300A, IL10RA, BMP8A, IRS2, FOS, MMP9, AGT, FCNA, ADGRD1, CCL8, CHST11, FRZB, AXL, ZYX, IGTP, TXNIP, SLIT3, NBL1	96	2837	20051	1.6933	1	0.262351	0.257271
	GOTERM_BP_FAT	GO:0008285~negative regulation of cell proliferation	10	9.52381	0.0124745	CSF1R, NGFR, CITED2, CD300A, FRZB, WT1, SLIT3, MMP9, AGT, RERG	96	789	20051	2.64721	1	0.266601	0.26144
	GOTERM_BP_FAT	GO:1905039~carboxylic acid transmembrane transport	4	3.80952	0.0126173	OSR1, SLC1A3, IRS2, AGT	96	102	20051	8.19077	1	0.266601	0.26144
	GOTERM_BP_FAT	GO:0002028~regulation of sodium ion transport	4	3.80952	0.0126173	OSR1, SIK1, ATP1A1, SGK1	96	102	20051	8.19077	1	0.266601	0.26144
	GOTERM_BP_FAT	GO:0045137~development of primary sexual characteristics	6	5.71429	0.012828	CITED2, WT1, OSR1, SLIT3, PGR, AGT	96	293	20051	4.27709	1	0.268209	0.263016
	GOTERM_BP_FAT	GO:0030097~hemopoiesis	12	11.4286	0.0128582	CSF1R, ZFP36, MAFB, VNN1, CEBPD, CITED2, AXL, IRF2BP2, PRG4, STON2, FOS, C1QC	96	1077	20051	2.32718	1	0.268209	0.263016
	GOTERM_BP_FAT	GO:1903825~organic acid transmembrane transport	4	3.80952	0.0129519	OSR1, SLC1A3, IRS2, AGT	96	103	20051	8.11125	1	0.268444	0.263246
	GOTERM_BP_FAT	GO:0002253~activation of immune response	9	8.57143	0.0131762	C1QB, FCNA, IFI208, C1QA, FYB2, CD300A, IGTP, PIK3AP1, C1QC	96	661	20051	2.84384	1	0.271364	0.26611
	GOTERM_BP_FAT	GO:0032680~regulation of tumor necrosis factor production	5	4.7619	0.0134243	ERRFI1, ZFP36, AXL, PTAFR, CYBB	96	193	20051	5.411	1	0.273801	0.2685
	GOTERM_BP_FAT	GO:1902531~regulation of intracellular signal transduction	17	16.1905	0.0135076	NGFR, ERRFI1, CSF1R, CD300A, WWC1, IL10RA, PTPN13, MMP9, AGT, TRDN, NET1, CCL8, VNN1, RASA3, AXL, PIK3AP1, PTPN5	96	1858	20051	1.91103	1	0.273801	0.2685
	GOTERM_BP_FAT	GO:0009967~positive regulation of signal transduction	16	15.2381	0.0135909	NGFR, CSF1R, PTGIS, CITED2, CD300A, WWC1, IL10RA, BMP8A, MMP9, AGT, TRDN, NET1, CCL8, AXL, IGTP, PIK3AP1	96	1699	20051	1.96694	1	0.273801	0.2685
	GOTERM_BP_FAT	GO:0006821~chloride transport	4	3.80952	0.0136365	ANO1, PTAFR, SLC1A3, ANO5	96	105	20051	7.95675	1	0.273801	0.2685
	GOTERM_BP_FAT	GO:0032412~regulation of ion transmembrane transporter activity	6	5.71429	0.0137153	OSR1, PTAFR, ATP2A1, ASIC2, MMP9, TRDN	96	298	20051	4.20533	1	0.273801	0.2685
	GOTERM_BP_FAT	GO:0043271~negative regulation of ion transport	5	4.7619	0.0138949	CD300A, OSR1, IRS2, MMP9, TRDN	96	195	20051	5.3555	1	0.274018	0.268713
	GOTERM_BP_FAT	GO:0006796~phosphate-containing compound metabolic process	25	23.8095	0.0140415	ERRFI1, CSF1R, ISYNA1, OXTR, WWC1, SAA3, PTAFR, ATP5K, IRS2, RXFP1, ZFP36, CCL8, HMGCS2, NGFR, CD300A, BMP8A, PTPN13, MMP9, AGT, AXL, IGTP, TMEM119, SIK1, SGK1, PTPN5	96	3224	20051	1.61961	1	0.274018	0.268713
	GOTERM_BP_FAT	GO:1903555~regulation of tumor necrosis factor superfamily cytokine production	5	4.7619	0.0141341	ERRFI1, ZFP36, AXL, PTAFR, CYBB	96	196	20051	5.32818	1	0.274018	0.268713
	GOTERM_BP_FAT	GO:0007179~transforming growth factor beta receptor signaling pathway	5	4.7619	0.0141341	CHST11, CITED2, BMP8A, ZYX, FOS	96	196	20051	5.32818	1	0.274018	0.268713
	GOTERM_BP_FAT	GO:0035801~adrenal cortex development	2	1.90476	0.0141472	CITED2, WT1	96	3	20051	139.243	1	0.274018	0.268713
	GOTERM_BP_FAT	GO:0060429~epithelium development	14	13.3333	0.0143375	NGFR, ERRFI1, CITED2, OSR1, MMP9, AGT, APOLD1, MYCL, ZFP36, MAFB, FRZB, WT1, TXNIP, PGR	96	1396	20051	2.09463	1	0.276061	0.270717
	GOTERM_BP_FAT	GO:0019220~regulation of phosphate metabolic process	17	16.1905	0.0144293	NGFR, ERRFI1, CSF1R, CD300A, WWC1, PTAFR, BMP8A, IRS2, PTPN13, MMP9, RXFP1, AGT, CCL8, AXL, IGTP, TMEM119, PTPN5	96	1872	20051	1.89674	1	0.276193	0.270846
	GOTERM_BP_FAT	GO:0051174~regulation of phosphorus metabolic process	17	16.1905	0.0147702	NGFR, ERRFI1, CSF1R, CD300A, WWC1, PTAFR, BMP8A, IRS2, PTPN13, MMP9, RXFP1, AGT, CCL8, AXL, IGTP, TMEM119, PTPN5	96	1877	20051	1.89169	1	0.280709	0.275275
	GOTERM_BP_FAT	GO:0010038~response to metal ion	7	6.66667	0.0150026	ACTA1, C1QA, TRPC3, CYBB, TXNIP, FOS, MMP9	96	421	20051	3.47281	1	0.280709	0.275275
	GOTERM_BP_FAT	GO:0060485~mesenchyme development	6	5.71429	0.0150258	ACTA1, BNC2, CITED2, FRZB, WT1, OSR1	96	305	20051	4.10881	1	0.280709	0.275275
	GOTERM_BP_FAT	GO:0046427~positive regulation of JAK-STAT cascade	4	3.80952	0.0154368	CSF1R, CD300A, IL10RA, AGT	96	110	20051	7.59508	1	0.280709	0.275275
	GOTERM_BP_FAT	GO:0048608~reproductive structure development	8	7.61905	0.0154854	PTGIS, CITED2, AXL, WT1, OSR1, SLIT3, PGR, AGT	96	549	20051	3.04356	1	0.280709	0.275275
	GOTERM_BP_FAT	GO:0055080~cation homeostasis	10	9.52381	0.0155789	OXTR, CCL8, TRPC3, SLC1A3, ATP2A1, ATP1A1, CAR12, SGK1, AGT, TRDN	96	819	20051	2.55024	1	0.280709	0.275275
	GOTERM_BP_FAT	GO:0071706~tumor necrosis factor superfamily cytokine production	5	4.7619	0.0156243	ERRFI1, ZFP36, AXL, PTAFR, CYBB	96	202	20051	5.16992	1	0.280709	0.275275
	GOTERM_BP_FAT	GO:0016310~phosphorylation	20	19.0476	0.0157376	NGFR, ERRFI1, CSF1R, OXTR, CD300A, WWC1, SAA3, BMP8A, IRS2, PTPN13, MMP9, AGT, ZFP36, CCL8, AXL, IGTP, TMEM119, SIK1, SGK1, PTPN5	96	2389	20051	1.74855	1	0.280709	0.275275
	GOTERM_BP_FAT	GO:0022898~regulation of transmembrane transporter activity	6	5.71429	0.0158112	OSR1, PTAFR, ATP2A1, ASIC2, MMP9, TRDN	96	309	20051	4.05562	1	0.280709	0.275275
	GOTERM_BP_FAT	GO:0000165~MAPK cascade	10	9.52381	0.0160325	CSF1R, NGFR, ERRFI1, ZFP36, OXTR, CCL8, CD300A, WWC1, PTPN5, AGT	96	823	20051	2.53784	1	0.280709	0.275275
	GOTERM_BP_FAT	GO:0023014~signal transduction by protein phosphorylation	10	9.52381	0.0160325	CSF1R, NGFR, ERRFI1, ZFP36, OXTR, CCL8, CD300A, WWC1, PTPN5, AGT	96	823	20051	2.53784	1	0.280709	0.275275
	GOTERM_BP_FAT	GO:0065009~regulation of molecular function	22	20.9524	0.0161144	NGFR, ERRFI1, CSF1R, PTGIS, CD300A, OSR1, PTAFR, ATP2A1, IRS2, MMP9, RXFP1, AGT, TRDN, NET1, ZFP36, CCL8, RASA3, AXL, IGTP, SIK1, ASIC2, PTPN5	96	2737	20051	1.67885	1	0.280709	0.275275
	GOTERM_BP_FAT	GO:0001944~vasculature development	10	9.52381	0.0161474	NGFR, ERRFI1, PTGIS, CITED2, WT1, OSR1, CYBB, MMP9, AGT, APOLD1	96	824	20051	2.53476	1	0.280709	0.275275
	GOTERM_BP_FAT	GO:0072358~cardiovascular system development	10	9.52381	0.0161474	NGFR, ERRFI1, PTGIS, CITED2, WT1, OSR1, CYBB, MMP9, AGT, APOLD1	96	824	20051	2.53476	1	0.280709	0.275275
	GOTERM_BP_FAT	GO:0032570~response to progesterone	3	2.85714	0.0161551	OXTR, TXNIP, FOS	96	41	20051	15.2828	1	0.280709	0.275275
	GOTERM_BP_FAT	GO:0061458~reproductive system development	8	7.61905	0.0161968	PTGIS, CITED2, AXL, WT1, OSR1, SLIT3, PGR, AGT	96	554	20051	3.0161	1	0.280709	0.275275
	GOTERM_BP_FAT	GO:0034599~cellular response to oxidative stress	6	5.71429	0.016214	NET1, NGFR, VNN1, AXL, FOS, MMP9	96	311	20051	4.02954	1	0.280709	0.275275
	GOTERM_BP_FAT	GO:0032989~cellular component morphogenesis	13	12.381	0.016218	NGFR, CSF1R, SLC1A3, LDB3, FBXO31, ACTA1, CSRP2, AXL, SLIT3, FLNC, SGK1, MYH4, NBL1	96	1265	20051	2.14643	1	0.280709	0.275275
	GOTERM_BP_FAT	GO:0034766~negative regulation of ion transmembrane transport	4	3.80952	0.0165783	OSR1, IRS2, MMP9, TRDN	96	113	20051	7.39344	1	0.284625	0.279114
	GOTERM_BP_FAT	GO:0030308~negative regulation of cell growth	5	4.7619	0.0166708	FRZB, WT1, SLIT3, AGT, RERG	96	206	20051	5.06953	1	0.284625	0.279114
	GOTERM_BP_FAT	GO:0051050~positive regulation of transport	12	11.4286	0.0167757	ANO1, OXTR, TRPC3, AXL, PTAFR, ATP2A1, IRS2, SGK1, ASIC2, PTPN5, AGT, TRDN	96	1120	20051	2.23783	1	0.284625	0.279114
	GOTERM_BP_FAT	GO:0071383~cellular response to steroid hormone stimulus	5	4.7619	0.0169391	ERRFI1, ZFP36, PGR, ATP1A1, SGK1	96	207	20051	5.04504	1	0.284625	0.279114
	GOTERM_BP_FAT	GO:0098771~inorganic ion homeostasis	10	9.52381	0.0169688	OXTR, CCL8, TRPC3, SLC1A3, ATP2A1, ATP1A1, CAR12, SGK1, AGT, TRDN	96	831	20051	2.51341	1	0.284625	0.279114
	GOTERM_BP_FAT	GO:1904894~positive regulation of STAT cascade	4	3.80952	0.016969	CSF1R, CD300A, IL10RA, AGT	96	114	20051	7.32858	1	0.284625	0.279114
	GOTERM_BP_FAT	GO:0061448~connective tissue development	6	5.71429	0.0172509	CHST11, FRZB, WT1, OSR1, BMP8A, RXFP1	96	316	20051	3.96578	1	0.287442	0.281877
	GOTERM_BP_FAT	GO:0030004~cellular monovalent inorganic cation homeostasis	4	3.80952	0.0173649	SLC1A3, ATP1A1, SGK1, AGT	96	115	20051	7.26486	1	0.287442	0.281877
	GOTERM_BP_FAT	GO:0034767~positive regulation of ion transmembrane transport	5	4.7619	0.0174839	PTAFR, ATP2A1, ASIC2, AGT, TRDN	96	209	20051	4.99676	1	0.287442	0.281877
	GOTERM_BP_FAT	GO:0048534~hematopoietic or lymphoid organ development	12	11.4286	0.0174903	CSF1R, ZFP36, MAFB, VNN1, CEBPD, CITED2, AXL, IRF2BP2, PRG4, STON2, FOS, C1QC	96	1127	20051	2.22394	1	0.287442	0.281877
	GOTERM_BP_FAT	GO:0001503~ossification	7	6.66667	0.018062	SLC26A2, CEBPD, OSR1, TMEM119, BMP8A, RPL38, MMP9	96	439	20051	3.33041	1	0.295345	0.289627
	GOTERM_BP_FAT	GO:1902532~negative regulation of intracellular signal transduction	8	7.61905	0.0183124	ERRFI1, VNN1, RASA3, CD300A, WWC1, MMP9, PTPN5, AGT	96	568	20051	2.94175	1	0.297943	0.292174
	GOTERM_BP_FAT	GO:0032409~regulation of transporter activity	6	5.71429	0.0185523	OSR1, PTAFR, ATP2A1, ASIC2, MMP9, TRDN	96	322	20051	3.89189	1	0.298858	0.293071
	GOTERM_BP_FAT	GO:0030198~extracellular matrix organization	6	5.71429	0.0185523	WT1, SPOCK2, P3H4, MMP9, RXFP1, AGT	96	322	20051	3.89189	1	0.298858	0.293071
	GOTERM_BP_FAT	GO:0006793~phosphorus metabolic process	25	23.8095	0.0189153	ERRFI1, CSF1R, ISYNA1, OXTR, WWC1, SAA3, PTAFR, ATP5K, IRS2, RXFP1, ZFP36, CCL8, HMGCS2, NGFR, CD300A, BMP8A, PTPN13, MMP9, AGT, AXL, IGTP, TMEM119, SIK1, SGK1, PTPN5	96	3309	20051	1.578	1	0.300787	0.294964
	GOTERM_BP_FAT	GO:0034763~negative regulation of transmembrane transport	4	3.80952	0.0190001	OSR1, IRS2, MMP9, TRDN	96	119	20051	7.02066	1	0.300787	0.294964
	GOTERM_BP_FAT	GO:0043062~extracellular structure organization	6	5.71429	0.0190001	WT1, SPOCK2, P3H4, MMP9, RXFP1, AGT	96	324	20051	3.86786	1	0.300787	0.294964
	GOTERM_BP_FAT	GO:0035265~organ growth	5	4.7619	0.0191835	BNC2, CITED2, WT1, WWC1, AGT	96	215	20051	4.85732	1	0.300787	0.294964
	GOTERM_BP_FAT	GO:1901699~cellular response to nitrogen compound	10	9.52381	0.0192219	ACTA1, NGFR, ERRFI1, ANO1, PTAFR, SLC1A3, CYBB, IRS2, SGK1, AGT	96	849	20051	2.46012	1	0.300787	0.294964
	GOTERM_BP_FAT	GO:0009410~response to xenobiotic stimulus	6	5.71429	0.0192267	EMX2, SLC1A3, ATP1A1, FOS, ASIC2, MMP9	96	325	20051	3.85596	1	0.300787	0.294964
	GOTERM_BP_FAT	GO:0034764~positive regulation of transmembrane transport	5	4.7619	0.0194764	PTAFR, ATP2A1, ASIC2, AGT, TRDN	96	216	20051	4.83483	1	0.303235	0.297364
	GOTERM_BP_FAT	GO:0033554~cellular response to stress	18	17.1429	0.0196235	NGFR, ERRFI1, PTGIS, CITED2, CYBB, ATP2A1, FOS, MMP9, AGT, FBXO31, NET1, ANO1, ZFP36, VNN1, RASA3, AXL, SIK1, SGK1	96	2106	20051	1.78517	1	0.304071	0.298184
	GOTERM_BP_FAT	GO:0030003~cellular cation homeostasis	9	8.57143	0.0198655	OXTR, CCL8, TRPC3, SLC1A3, ATP2A1, ATP1A1, SGK1, AGT, TRDN	96	713	20051	2.63644	1	0.306035	0.30011
	GOTERM_BP_FAT	GO:0001501~skeletal system development	8	7.61905	0.0199384	CHST11, CITED2, FRZB, OSR1, TMEM119, BMP8A, RPL38, MMP9	96	578	20051	2.89086	1	0.306035	0.30011
	GOTERM_BP_FAT	GO:0042327~positive regulation of phosphorylation	12	11.4286	0.02058	CSF1R, NGFR, CCL8, CD300A, AXL, WWC1, IGTP, TMEM119, BMP8A, MMP9, PTPN5, AGT	96	1155	20051	2.17002	1	0.314401	0.308314
	GOTERM_BP_FAT	GO:0030334~regulation of cell migration	11	10.4762	0.0208256	CSF1R, NGFR, CITED2, CD300A, PTAFR, IRS2, PGR, MMP9, NBL1, AGT, FBXO31	96	1007	20051	2.28154	1	0.316666	0.310535
	GOTERM_BP_FAT	GO:0051270~regulation of cellular component movement	12	11.4286	0.021172	CSF1R, NGFR, CITED2, CD300A, PTAFR, IRS2, PGR, ATP1A1, MMP9, NBL1, AGT, FBXO31	96	1160	20051	2.16067	1	0.319865	0.313672
	GOTERM_BP_FAT	GO:0098662~inorganic cation transmembrane transport	9	8.57143	0.0212326	KCNK5, TRPC3, OSR1, ATP5K, SLC1A3, ATP2A1, ATP1A1, ASIC2, TRDN	96	722	20051	2.60358	1	0.319865	0.313672
	GOTERM_BP_FAT	GO:0007169~transmembrane receptor protein tyrosine kinase signaling pathway	8	7.61905	0.0214862	CSF1R, NGFR, ERRFI1, AXL, TXNIP, IRS2, MMP9, AGT	96	587	20051	2.84654	1	0.322194	0.315956
	GOTERM_BP_FAT	GO:0051385~response to mineralocorticoid	3	2.85714	0.0217536	CYBB, FOS, SGK1	96	48	20051	13.054	1	0.323224	0.316966
	GOTERM_BP_FAT	GO:0045214~sarcomere organization	3	2.85714	0.0217536	CSRP2, LDB3, FLNC	96	48	20051	13.054	1	0.323224	0.316966
	GOTERM_BP_FAT	GO:0048145~regulation of fibroblast proliferation	4	3.80952	0.0220605	NGFR, CD300A, MMP9, AGT	96	126	20051	6.63062	1	0.326296	0.319978
	GOTERM_BP_FAT	GO:0006873~cellular ion homeostasis	9	8.57143	0.0226656	OXTR, CCL8, TRPC3, SLC1A3, ATP2A1, ATP1A1, SGK1, AGT, TRDN	96	731	20051	2.57152	1	0.333727	0.327266
	GOTERM_BP_FAT	GO:0046620~regulation of organ growth	4	3.80952	0.0229815	CITED2, WT1, WWC1, AGT	96	128	20051	6.52702	1	0.336856	0.330334
	GOTERM_BP_FAT	GO:0060538~skeletal muscle organ development	5	4.7619	0.0232081	ACTA1, CITED2, WT1, FOS, MYH4	96	228	20051	4.58036	1	0.33865	0.332094
	GOTERM_BP_FAT	GO:0035850~epithelial cell differentiation involved in kidney development	3	2.85714	0.0234807	WT1, OSR1, MMP9	96	50	20051	12.5319	1	0.340402	0.333811
	GOTERM_BP_FAT	GO:0002218~activation of innate immune response	5	4.7619	0.0235373	FCNA, IFI208, CD300A, IGTP, PIK3AP1	96	229	20051	4.56036	1	0.340402	0.333811
	GOTERM_BP_FAT	GO:0055065~metal ion homeostasis	9	8.57143	0.024166	OXTR, CCL8, TRPC3, SLC1A3, ATP2A1, ATP1A1, SGK1, AGT, TRDN	96	740	20051	2.54024	1	0.347947	0.341211
	GOTERM_BP_FAT	GO:0009416~response to light stimulus	6	5.71429	0.0244026	SLC1A3, SIK1, FOS, SGK1, ASIC2, MMP9	96	346	20051	3.62193	1	0.349807	0.343034
	GOTERM_BP_FAT	GO:0008217~regulation of blood pressure	5	4.7619	0.0245422	OXTR, PTAFR, ATP1A1, ASIC2, AGT	96	232	20051	4.50139	1	0.350264	0.343483
	GOTERM_BP_FAT	GO:0002520~immune system development	12	11.4286	0.0248578	CSF1R, ZFP36, MAFB, VNN1, CEBPD, CITED2, AXL, IRF2BP2, PRG4, STON2, FOS, C1QC	96	1189	20051	2.10797	1	0.351033	0.344237
	GOTERM_BP_FAT	GO:0008585~female gonad development	4	3.80952	0.0248857	WT1, SLIT3, PGR, AGT	96	132	20051	6.32923	1	0.351033	0.344237
	GOTERM_BP_FAT	GO:0050790~regulation of catalytic activity	17	16.1905	0.0249197	NGFR, ERRFI1, CSF1R, CD300A, PTAFR, ATP2A1, IRS2, MMP9, RXFP1, AGT, NET1, ZFP36, CCL8, RASA3, AXL, IGTP, PTPN5	96	1996	20051	1.77891	1	0.351033	0.344237
	GOTERM_BP_FAT	GO:0048562~embryonic organ morphogenesis	6	5.71429	0.0252085	MAFB, CHST11, CITED2, FRZB, OSR1, RPL38	96	349	20051	3.5908	1	0.353571	0.346726
	GOTERM_BP_FAT	GO:0014706~striated muscle tissue development	7	6.66667	0.0254167	ACTA1, CITED2, WT1, SIK1, FOS, MYH4, AGT	96	475	20051	3.078	1	0.354961	0.348089
	GOTERM_BP_FAT	GO:0022414~reproductive process	17	16.1905	0.025756	OXTR, PTGIS, TRPC3, CITED2, OSR1, PTAFR, BMP8A, FOS, MMP9, RXFP1, AGT, AXL, WT1, TMEM119, PGR, SLIT3, FOLR2	96	2004	20051	1.77181	1	0.358162	0.351228
	GOTERM_BP_FAT	GO:0000003~reproduction	17	16.1905	0.0259684	OXTR, PTGIS, TRPC3, CITED2, OSR1, PTAFR, BMP8A, FOS, MMP9, RXFP1, AGT, AXL, WT1, TMEM119, PGR, SLIT3, FOLR2	96	2006	20051	1.77004	1	0.359579	0.352617
	GOTERM_BP_FAT	GO:1901216~positive regulation of neuron death	4	3.80952	0.0263681	C1QA, NGFR, FOS, PTPN5	96	135	20051	6.18858	1	0.363567	0.356528
	GOTERM_BP_FAT	GO:0043434~response to peptide hormone	7	6.66667	0.0268117	ERRFI1, OXTR, CYBB, ATP2A1, IRS2, SGK1, AGT	96	481	20051	3.03961	1	0.365872	0.358788
	GOTERM_BP_FAT	GO:0042391~regulation of membrane potential	7	6.66667	0.0268117	KCNK5, NGFR, ANO1, ATP1A1, ASIC2, AGT, TRDN	96	481	20051	3.03961	1	0.365872	0.358788
	GOTERM_BP_FAT	GO:0051153~regulation of striated muscle cell differentiation	4	3.80952	0.0268726	CCL8, TMEM119, SIK1, MYH4	96	136	20051	6.14308	1	0.365872	0.358788
	GOTERM_BP_FAT	GO:0002685~regulation of leukocyte migration	5	4.7619	0.0269869	CSF1R, CD300A, PTAFR, MMP9, NBL1	96	239	20051	4.36955	1	0.365897	0.358813
	GOTERM_BP_FAT	GO:0048839~inner ear development	5	4.7619	0.0273476	C1QB, MYCL, MAFB, CEBPD, FRZB	96	240	20051	4.35135	1	0.366674	0.359575
	GOTERM_BP_FAT	GO:0033673~negative regulation of kinase activity	5	4.7619	0.0273476	ERRFI1, CD300A, IRS2, PTPN5, AGT	96	240	20051	4.35135	1	0.366674	0.359575
	GOTERM_BP_FAT	GO:0046545~development of primary female sexual characteristics	4	3.80952	0.0273822	WT1, SLIT3, PGR, AGT	96	137	20051	6.09824	1	0.366674	0.359575
	GOTERM_BP_FAT	GO:0048878~chemical homeostasis	13	12.381	0.0275101	NGFR, OXTR, TRPC3, SLC1A3, ATP2A1, IRS2, ATP1A1, AGT, TRDN, ANO1, CCL8, CAR12, SGK1	96	1365	20051	1.98919	1	0.366876	0.359773
	GOTERM_BP_FAT	GO:1902476~chloride transmembrane transport	3	2.85714	0.0280348	ANO1, SLC1A3, ANO5	96	55	20051	11.3926	1	0.371027	0.363843
	GOTERM_BP_FAT	GO:2000697~negative regulation of epithelial cell differentiation involved in kidney development	2	1.90476	0.0280964	OSR1, MMP9	96	6	20051	69.6215	1	0.371027	0.363843
	GOTERM_BP_FAT	GO:0042325~regulation of phosphorylation	15	14.2857	0.0281634	NGFR, ERRFI1, CSF1R, CD300A, WWC1, BMP8A, IRS2, PTPN13, MMP9, AGT, CCL8, AXL, IGTP, TMEM119, PTPN5	96	1693	20051	1.85054	1	0.371027	0.363843
	GOTERM_BP_FAT	GO:0032414~positive regulation of ion transmembrane transporter activity	4	3.80952	0.028417	PTAFR, ATP2A1, ASIC2, TRDN	96	139	20051	6.01049	1	0.372858	0.36564
	GOTERM_BP_FAT	GO:0045637~regulation of myeloid cell differentiation	5	4.7619	0.0288196	CSF1R, ZFP36, MAFB, FOS, C1QC	96	244	20051	4.28001	1	0.375254	0.367989
	GOTERM_BP_FAT	GO:0043500~muscle adaptation	4	3.80952	0.0289421	ACTA1, ERRFI1, TRPC3, AGT	96	140	20051	5.96756	1	0.375254	0.367989
	GOTERM_BP_FAT	GO:0014888~striated muscle adaptation	3	2.85714	0.0289849	ACTA1, ERRFI1, TRPC3	96	56	20051	11.1892	1	0.375254	0.367989
	GOTERM_BP_FAT	GO:1902105~regulation of leukocyte differentiation	6	5.71429	0.0291957	CSF1R, MAFB, VNN1, AXL, FOS, C1QC	96	363	20051	3.45231	1	0.375254	0.367989
	GOTERM_BP_FAT	GO:0006979~response to oxidative stress	7	6.66667	0.0292485	NET1, NGFR, VNN1, AXL, TXNIP, FOS, MMP9	96	491	20051	2.9777	1	0.375254	0.367989
	GOTERM_BP_FAT	GO:0044070~regulation of anion transport	4	3.80952	0.0294724	OSR1, PTAFR, IRS2, AGT	96	141	20051	5.92524	1	0.375254	0.367989
	GOTERM_BP_FAT	GO:1903706~regulation of hemopoiesis	7	6.66667	0.0294999	CSF1R, ZFP36, MAFB, VNN1, AXL, FOS, C1QC	96	492	20051	2.97165	1	0.375254	0.367989
	GOTERM_BP_FAT	GO:0050778~positive regulation of immune response	10	9.52381	0.0295434	C1QB, FCNA, IFI208, C1QA, FYB2, CD300A, PTAFR, IGTP, PIK3AP1, C1QC	96	916	20051	2.28018	1	0.375254	0.367989
	GOTERM_BP_FAT	GO:2000145~regulation of cell motility	11	10.4762	0.0297166	CSF1R, NGFR, CITED2, CD300A, PTAFR, IRS2, PGR, MMP9, NBL1, AGT, FBXO31	96	1068	20051	2.15123	1	0.375254	0.367989
	GOTERM_BP_FAT	GO:0009314~response to radiation	7	6.66667	0.0297528	NET1, SLC1A3, SIK1, FOS, SGK1, ASIC2, MMP9	96	493	20051	2.96562	1	0.375254	0.367989
	GOTERM_BP_FAT	GO:0021545~cranial nerve development	3	2.85714	0.0299478	MAFB, CITED2, SLC1A3	96	57	20051	10.9929	1	0.376255	0.368971
	GOTERM_BP_FAT	GO:0071396~cellular response to lipid	9	8.57143	0.0304679	ERRFI1, ZFP36, AXL, OSR1, PTAFR, IGTP, PGR, ATP1A1, SGK1	96	774	20051	2.42866	1	0.381318	0.373935
	GOTERM_BP_FAT	GO:0035295~tube development	9	8.57143	0.0308708	ERRFI1, EMX2, OXTR, CITED2, WT1, OSR1, PGR, RXFP1, AGT	96	776	20051	2.4224	1	0.38488	0.377429
	GOTERM_BP_FAT	GO:0048144~fibroblast proliferation	4	3.80952	0.031094	NGFR, CD300A, MMP9, AGT	96	144	20051	5.80179	1	0.386183	0.378706
	GOTERM_BP_FAT	GO:0001934~positive regulation of protein phosphorylation	11	10.4762	0.0313991	CSF1R, NGFR, CCL8, CD300A, WWC1, IGTP, TMEM119, BMP8A, MMP9, PTPN5, AGT	96	1078	20051	2.13127	1	0.388041	0.380528
	GOTERM_BP_FAT	GO:0001568~blood vessel development	9	8.57143	0.0314821	NGFR, PTGIS, CITED2, WT1, OSR1, CYBB, MMP9, AGT, APOLD1	96	779	20051	2.41307	1	0.388041	0.380528
	GOTERM_BP_FAT	GO:0014902~myotube differentiation	4	3.80952	0.0316448	ACTA1, CCL8, TMEM119, MYH4	96	145	20051	5.76178	1	0.388575	0.381051
	GOTERM_BP_FAT	GO:0045604~regulation of epidermal cell differentiation	3	2.85714	0.0319114	MYCL, ERRFI1, ZFP36	96	59	20051	10.6202	1	0.388912	0.381383
	GOTERM_BP_FAT	GO:0030857~negative regulation of epithelial cell differentiation	3	2.85714	0.0319114	FRZB, OSR1, MMP9	96	59	20051	10.6202	1	0.388912	0.381383
	GOTERM_BP_FAT	GO:0032411~positive regulation of transporter activity	4	3.80952	0.0322008	PTAFR, ATP2A1, ASIC2, TRDN	96	146	20051	5.72232	1	0.390975	0.383405
	GOTERM_BP_FAT	GO:0010533~regulation of activation of Janus kinase activity	2	1.90476	0.0327026	CD300A, AGT	96	7	20051	59.6756	1	0.393383	0.385767
	GOTERM_BP_FAT	GO:0002573~myeloid leukocyte differentiation	5	4.7619	0.032703	CSF1R, MAFB, CITED2, FOS, C1QC	96	254	20051	4.11151	1	0.393383	0.385767
	GOTERM_BP_FAT	GO:0042471~ear morphogenesis	4	3.80952	0.0327618	MAFB, FRZB, OSR1, RPL38	96	147	20051	5.68339	1	0.393383	0.385767
	GOTERM_BP_FAT	GO:0000302~response to reactive oxygen species	5	4.7619	0.0331074	NET1, AXL, TXNIP, FOS, MMP9	96	255	20051	4.09538	1	0.396072	0.388404
	GOTERM_BP_FAT	GO:0016049~cell growth	7	6.66667	0.033719	CSF1R, FRZB, WT1, SLIT3, SGK1, AGT, RERG	96	508	20051	2.87806	1	0.400523	0.392768
	GOTERM_BP_FAT	GO:0002761~regulation of myeloid leukocyte differentiation	4	3.80952	0.0338992	CSF1R, MAFB, FOS, C1QC	96	149	20051	5.6071	1	0.400523	0.392768
	GOTERM_BP_FAT	GO:0061005~cell differentiation involved in kidney development	3	2.85714	0.0339244	WT1, OSR1, MMP9	96	61	20051	10.272	1	0.400523	0.392768
	GOTERM_BP_FAT	GO:0031347~regulation of defense response	9	8.57143	0.0340109	FCNA, IFI208, ZFP36, PTGIS, CD300A, IGTP, ZYX, PIK3AP1, AGT	96	791	20051	2.37646	1	0.400523	0.392768
	GOTERM_BP_FAT	GO:1901342~regulation of vasculature development	6	5.71429	0.034218	NGFR, PTGIS, WT1, CYBB, MMP9, AGT	96	379	20051	3.30656	1	0.400523	0.392768
	GOTERM_BP_FAT	GO:1901653~cellular response to peptide	6	5.71429	0.034218	NGFR, ERRFI1, ANO1, IRS2, SGK1, AGT	96	379	20051	3.30656	1	0.400523	0.392768
	GOTERM_BP_FAT	GO:0098739~import across plasma membrane	4	3.80952	0.0344756	KCNK5, SLC1A3, ATP1A1, AGT	96	150	20051	5.56972	1	0.402092	0.394307
	GOTERM_BP_FAT	GO:0071496~cellular response to external stimulus	6	5.71429	0.0348813	AXL, SIK1, ATP1A1, FOS, MMP9, AGT	96	381	20051	3.28921	1	0.40537	0.397522
	GOTERM_BP_FAT	GO:0044236~multicellular organism metabolic process	4	3.80952	0.035057	ERRFI1, BMP8A, P3H4, MMP9	96	151	20051	5.53284	1	0.405574	0.397722
	GOTERM_BP_FAT	GO:0003002~regionalization	6	5.71429	0.0352159	EMX2, MAFB, CITED2, WT1, OSR1, NBL1	96	382	20051	3.2806	1	0.405574	0.397722
	GOTERM_BP_FAT	GO:0051093~negative regulation of developmental process	12	11.4286	0.035317	NGFR, ZFP36, MAFB, CITED2, FRZB, WT1, WWC1, OSR1, TMEM119, MMP9, AGT, C1QC	96	1257	20051	1.99393	1	0.405574	0.397722
	GOTERM_BP_FAT	GO:0044723~single-organism carbohydrate metabolic process	7	6.66667	0.0353973	ISYNA1, CHST11, B3GALT2, PTAFR, IRS2, SIK1, ST6GALNAC5	96	514	20051	2.84446	1	0.405574	0.397722
	GOTERM_BP_FAT	GO:0032504~multicellular organism reproduction	12	11.4286	0.0356657	OXTR, PTGIS, CITED2, AXL, WT1, PTAFR, TMEM119, BMP8A, SLIT3, PGR, FOLR2, AGT	96	1259	20051	1.99077	1	0.406315	0.398448
	GOTERM_BP_FAT	GO:0040007~growth	11	10.4762	0.0357117	CSF1R, CHST11, BNC2, CITED2, FRZB, WT1, WWC1, SLIT3, SGK1, AGT, RERG	96	1102	20051	2.08486	1	0.406315	0.398448
	GOTERM_BP_FAT	GO:0046686~response to cadmium ion	3	2.85714	0.0370342	CYBB, FOS, MMP9	96	64	20051	9.79053	1	0.419835	0.411707
	GOTERM_BP_FAT	GO:0009629~response to gravity	2	1.90476	0.0372871	PTAFR, FOS	96	8	20051	52.2161	1	0.419835	0.411707
	GOTERM_BP_FAT	GO:1903789~regulation of amino acid transmembrane transport	2	1.90476	0.0372871	OSR1, AGT	96	8	20051	52.2161	1	0.419835	0.411707
	GOTERM_BP_FAT	GO:0034101~erythrocyte homeostasis	4	3.80952	0.0380403	ZFP36, MAFB, CITED2, AXL	96	156	20051	5.3555	1	0.426838	0.418574
	GOTERM_BP_FAT	GO:0071560~cellular response to transforming growth factor beta stimulus	5	4.7619	0.0381898	CHST11, CITED2, BMP8A, ZYX, FOS	96	267	20051	3.91132	1	0.427044	0.418776
	GOTERM_BP_FAT	GO:0008610~lipid biosynthetic process	8	7.61905	0.0385316	ISYNA1, PTGIS, B3GALT2, SIK1, HMGCS2, ATP1A1, AGT, ST6GALNAC5	96	665	20051	2.51266	1	0.42939	0.421077
	GOTERM_BP_FAT	GO:0050900~leukocyte migration	6	5.71429	0.0386723	CSF1R, CCL8, CD300A, PTAFR, MMP9, NBL1	96	392	20051	3.19691	1	0.429487	0.421172
	GOTERM_BP_FAT	GO:0050776~regulation of immune response	11	10.4762	0.0398137	C1QB, FCNA, IFI208, C1QA, FYB2, CD300A, AXL, PTAFR, IGTP, PIK3AP1, C1QC	96	1123	20051	2.04587	1	0.440659	0.432128
	GOTERM_BP_FAT	GO:0010830~regulation of myotube differentiation	3	2.85714	0.0402492	CCL8, TMEM119, SIK1	96	67	20051	9.35215	1	0.443118	0.434539
	GOTERM_BP_FAT	GO:0071559~response to transforming growth factor beta	5	4.7619	0.0404328	CHST11, CITED2, BMP8A, ZYX, FOS	96	272	20051	3.83942	1	0.443118	0.434539
	GOTERM_BP_FAT	GO:0001817~regulation of cytokine production	9	8.57143	0.0404444	FCNA, CSF1R, ERRFI1, ZFP36, AXL, PTAFR, CYBB, PRG4, AGT	96	819	20051	2.29522	1	0.443118	0.434539
	GOTERM_BP_FAT	GO:1904062~regulation of cation transmembrane transport	6	5.71429	0.0408427	OSR1, ATP2A1, ASIC2, MMP9, AGT, TRDN	96	398	20051	3.14871	1	0.445006	0.436391
	GOTERM_BP_FAT	GO:0009913~epidermal cell differentiation	5	4.7619	0.0408903	MYCL, ERRFI1, ZFP36, MAFB, TXNIP	96	273	20051	3.82536	1	0.445006	0.436391
	GOTERM_BP_FAT	GO:0044093~positive regulation of molecular function	14	13.3333	0.0418291	NGFR, CSF1R, CD300A, PTAFR, ATP2A1, MMP9, RXFP1, AGT, TRDN, NET1, CCL8, AXL, IGTP, ASIC2	96	1620	20051	1.805	1	0.450089	0.441375
	GOTERM_BP_FAT	GO:0072239~metanephric glomerulus vasculature development	2	1.90476	0.0418502	WT1, OSR1	96	9	20051	46.4144	1	0.450089	0.441375
	GOTERM_BP_FAT	GO:0060137~maternal process involved in parturition	2	1.90476	0.0418502	OXTR, PTAFR	96	9	20051	46.4144	1	0.450089	0.441375
	GOTERM_BP_FAT	GO:0008544~epidermis development	6	5.71429	0.0419553	NGFR, MYCL, ERRFI1, ZFP36, MAFB, TXNIP	96	401	20051	3.12516	1	0.450089	0.441375
	GOTERM_BP_FAT	GO:0048514~blood vessel morphogenesis	8	7.61905	0.0420489	NGFR, PTGIS, CITED2, WT1, CYBB, MMP9, AGT, APOLD1	96	678	20051	2.46448	1	0.450089	0.441375
	GOTERM_BP_FAT	GO:0097435~supramolecular fiber organization	9	8.57143	0.0424231	ACTA1, CSRP2, ZYX, LDB3, P3H4, FLNC, SGK1, MYH4, TRDN	96	827	20051	2.27301	1	0.45118	0.442445
	GOTERM_BP_FAT	GO:0048015~phosphatidylinositol-mediated signaling	4	3.80952	0.0424282	CSF1R, PTAFR, PIK3AP1, AGT	96	163	20051	5.12551	1	0.45118	0.442445
	GOTERM_BP_FAT	GO:0007417~central nervous system development	11	10.4762	0.0431513	CSF1R, C1QA, NGFR, EMX2, OXTR, MAFB, CITED2, AXL, AKR1C14, IRS2, AGT	96	1139	20051	2.01713	1	0.456786	0.447942
	GOTERM_BP_FAT	GO:0007399~nervous system development	20	19.0476	0.0432361	C1QA, NGFR, CSF1R, EMX2, OXTR, CITED2, SLC1A3, IRS2, FOS, AGT, FBXO31, MYCL, MAFB, AXL, AKR1C14, SLIT3, SGK1, ASIC2, NBL1, PTPN5	96	2666	20051	1.56688	1	0.456786	0.447942
	GOTERM_BP_FAT	GO:0042220~response to cocaine	3	2.85714	0.0435659	OXTR, SLC1A3, PGR	96	70	20051	8.95134	1	0.457467	0.44861
	GOTERM_BP_FAT	GO:1902533~positive regulation of intracellular signal transduction	11	10.4762	0.0435816	NET1, CSF1R, NGFR, CCL8, CD300A, AXL, WWC1, IL10RA, PIK3AP1, AGT, TRDN	96	1141	20051	2.01359	1	0.457467	0.44861
	GOTERM_BP_FAT	GO:1901214~regulation of neuron death	6	5.71429	0.0442353	C1QA, NGFR, AXL, FOS, PTPN5, AGT	96	407	20051	3.07908	1	0.462835	0.453875
	GOTERM_BP_FAT	GO:0048017~inositol lipid-mediated signaling	4	3.80952	0.0443834	CSF1R, PTAFR, PIK3AP1, AGT	96	166	20051	5.03288	1	0.462896	0.453934
	GOTERM_BP_FAT	GO:0015672~monovalent inorganic cation transport	7	6.66667	0.0449276	KCNK5, OSR1, ATP5K, SLC1A3, ATP1A1, SGK1, ASIC2	96	545	20051	2.68266	1	0.463656	0.45468
	GOTERM_BP_FAT	GO:0002521~leukocyte differentiation	8	7.61905	0.0451842	CSF1R, MAFB, VNN1, CITED2, AXL, IRF2BP2, FOS, C1QC	96	689	20051	2.42513	1	0.463656	0.45468
	GOTERM_BP_FAT	GO:0060541~respiratory system development	5	4.7619	0.0456273	ERRFI1, ANO1, WT1, PGR, RXFP1	96	283	20051	3.69019	1	0.463656	0.45468
	GOTERM_BP_FAT	GO:0044702~single organism reproductive process	15	14.2857	0.0456535	OXTR, PTGIS, TRPC3, CITED2, OSR1, PTAFR, BMP8A, MMP9, AGT, AXL, WT1, TMEM119, PGR, SLIT3, FOLR2	96	1810	20051	1.73092	1	0.463656	0.45468
	GOTERM_BP_FAT	GO:0060135~maternal process involved in female pregnancy	3	2.85714	0.0458318	PTGIS, CITED2, PGR	96	72	20051	8.70269	1	0.463656	0.45468
	GOTERM_BP_FAT	GO:1902895~positive regulation of pri-miRNA transcription from RNA polymerase II promoter	3	2.85714	0.0458318	NGFR, WT1, FOS	96	72	20051	8.70269	1	0.463656	0.45468
	GOTERM_BP_FAT	GO:0003333~amino acid transmembrane transport	3	2.85714	0.0458318	OSR1, SLC1A3, AGT	96	72	20051	8.70269	1	0.463656	0.45468
	GOTERM_BP_FAT	GO:1901566~organonitrogen compound biosynthetic process	13	12.381	0.0458665	RPLP1, PTAFR, ATP5K, SLC1A3, RXFP1, ZFP36, RPS27, CHST11, RPS29, WT1, B3GALT2, RPL38, ST6GALNAC5	96	1476	20051	1.83959	1	0.463656	0.45468
	GOTERM_BP_FAT	GO:0051962~positive regulation of nervous system development	8	7.61905	0.0463609	NGFR, OXTR, SGK1, ASIC2, PTPN5, NBL1, AGT, FBXO31	96	693	20051	2.41114	1	0.463656	0.45468
	GOTERM_BP_FAT	GO:0035360~positive regulation of peroxisome proliferator activated receptor signaling pathway	2	1.90476	0.0463919	PTGIS, CITED2	96	10	20051	41.7729	1	0.463656	0.45468
	GOTERM_BP_FAT	GO:1903242~regulation of cardiac muscle hypertrophy in response to stress	2	1.90476	0.0463919	ERRFI1, TRPC3	96	10	20051	41.7729	1	0.463656	0.45468
	GOTERM_BP_FAT	GO:0014866~skeletal myofibril assembly	2	1.90476	0.0463919	ACTA1, MYH4	96	10	20051	41.7729	1	0.463656	0.45468
	GOTERM_BP_FAT	GO:1904044~response to aldosterone	2	1.90476	0.0463919	CYBB, SGK1	96	10	20051	41.7729	1	0.463656	0.45468
	GOTERM_BP_FAT	GO:0040012~regulation of locomotion	11	10.4762	0.0464511	CSF1R, NGFR, CITED2, CD300A, PTAFR, IRS2, PGR, MMP9, NBL1, AGT, FBXO31	96	1154	20051	1.99091	1	0.463656	0.45468
	GOTERM_BP_FAT	GO:0044283~small molecule biosynthetic process	7	6.66667	0.0469412	ISYNA1, PTGIS, PTAFR, SLC1A3, SIK1, HMGCS2, AGT	96	551	20051	2.65345	1	0.466084	0.45706
	GOTERM_BP_FAT	GO:0043407~negative regulation of MAP kinase activity	3	2.85714	0.0469808	CD300A, PTPN5, AGT	96	73	20051	8.58348	1	0.466084	0.45706
	GOTERM_BP_FAT	GO:0007178~transmembrane receptor protein serine/threonine kinase signaling pathway	6	5.71429	0.0473897	CHST11, CITED2, BMP8A, ZYX, FOS, NBL1	96	415	20051	3.01973	1	0.468711	0.459637
	GOTERM_BP_FAT	GO:0060359~response to ammonium ion	4	3.80952	0.0491177	OXTR, PTAFR, SLC1A3, PGR	96	173	20051	4.82924	1	0.48433	0.474953
	GOTERM_BP_FAT	GO:0006937~regulation of muscle contraction	4	3.80952	0.0498135	OXTR, PTAFR, ATP2A1, ATP1A1	96	174	20051	4.80148	1	0.488636	0.479176
	GOTERM_BP_FAT	GO:0001816~cytokine production	9	8.57143	0.0498547	FCNA, CSF1R, ERRFI1, ZFP36, AXL, PTAFR, CYBB, PRG4, AGT	96	855	20051	2.19857	1	0.488636	0.479176
	GOTERM_BP_FAT	GO:0048732~gland development	7	6.66667	0.0500661	MAFB, CITED2, FRZB, WT1, IRS2, PGR, RXFP1	96	560	20051	2.61081	1	0.489234	0.479762
	GOTERM_BP_FAT	GO:0010612~regulation of cardiac muscle adaptation	2	1.90476	0.0509122	ERRFI1, TRPC3	96	11	20051	37.9754	1	0.493061	0.483515
	GOTERM_BP_FAT	GO:2000020~positive regulation of male gonad development	2	1.90476	0.0509122	CITED2, WT1	96	11	20051	37.9754	1	0.493061	0.483515
	GOTERM_BP_FAT	GO:0072203~cell proliferation involved in metanephros development	2	1.90476	0.0509122	WT1, OSR1	96	11	20051	37.9754	1	0.493061	0.483515
	GOTERM_BP_FAT	GO:0042058~regulation of epidermal growth factor receptor signaling pathway	3	2.85714	0.0516809	ERRFI1, MMP9, AGT	96	77	20051	8.13758	1	0.496076	0.486471
	GOTERM_BP_FAT	GO:0010611~regulation of cardiac muscle hypertrophy	3	2.85714	0.0516809	ERRFI1, TRPC3, AGT	96	77	20051	8.13758	1	0.496076	0.486471
	GOTERM_BP_FAT	GO:0071385~cellular response to glucocorticoid stimulus	3	2.85714	0.0516809	ERRFI1, ZFP36, SGK1	96	77	20051	8.13758	1	0.496076	0.486471
	GOTERM_BP_FAT	GO:0051051~negative regulation of transport	7	6.66667	0.0522192	OXTR, CD300A, OSR1, BMP8A, IRS2, MMP9, TRDN	96	566	20051	2.58313	1	0.499769	0.490093
	GOTERM_BP_FAT	GO:0034614~cellular response to reactive oxygen species	4	3.80952	0.0526449	NET1, AXL, FOS, MMP9	96	178	20051	4.69359	1	0.502366	0.492639
	GOTERM_BP_FAT	GO:0002683~negative regulation of immune system process	7	6.66667	0.0536859	ZFP36, MAFB, CD300A, AXL, PIK3AP1, NBL1, C1QC	96	570	20051	2.565	1	0.510801	0.500911
	GOTERM_BP_FAT	GO:0045089~positive regulation of innate immune response	5	4.7619	0.054357	FCNA, IFI208, CD300A, IGTP, PIK3AP1	96	300	20051	3.48108	1	0.515678	0.505695
	GOTERM_BP_FAT	GO:0072171~mesonephric tubule morphogenesis	3	2.85714	0.0553119	WT1, OSR1, AGT	96	80	20051	7.83242	1	0.51937	0.509315
	GOTERM_BP_FAT	GO:0014743~regulation of muscle hypertrophy	3	2.85714	0.0553119	ERRFI1, TRPC3, AGT	96	80	20051	7.83242	1	0.51937	0.509315
	GOTERM_BP_FAT	GO:0045647~negative regulation of erythrocyte differentiation	2	1.90476	0.0554114	ZFP36, MAFB	96	12	20051	34.8108	1	0.51937	0.509315
	GOTERM_BP_FAT	GO:0070471~uterine smooth muscle contraction	2	1.90476	0.0554114	OXTR, AGT	96	12	20051	34.8108	1	0.51937	0.509315
	GOTERM_BP_FAT	GO:0002221~pattern recognition receptor signaling pathway	4	3.80952	0.0555528	FCNA, CD300A, IGTP, PIK3AP1	96	182	20051	4.59043	1	0.51937	0.509315
	GOTERM_BP_FAT	GO:0003006~developmental process involved in reproduction	10	9.52381	0.0557038	PTGIS, CITED2, AXL, WT1, OSR1, TMEM119, BMP8A, SLIT3, PGR, AGT	96	1032	20051	2.02388	1	0.51937	0.509315
	GOTERM_BP_FAT	GO:0048729~tissue morphogenesis	8	7.61905	0.056488	ACTA1, NGFR, CITED2, FRZB, WT1, OSR1, PGR, AGT	96	725	20051	2.30471	1	0.52269	0.51257
	GOTERM_BP_FAT	GO:1901184~regulation of ERBB signaling pathway	3	2.85714	0.0565418	ERRFI1, MMP9, AGT	96	81	20051	7.73573	1	0.52269	0.51257
	GOTERM_BP_FAT	GO:0061097~regulation of protein tyrosine kinase activity	3	2.85714	0.0565418	CSF1R, ERRFI1, AGT	96	81	20051	7.73573	1	0.52269	0.51257
	GOTERM_BP_FAT	GO:0046425~regulation of JAK-STAT cascade	4	3.80952	0.0570352	CSF1R, CD300A, IL10RA, AGT	96	184	20051	4.54053	1	0.525758	0.515578
	GOTERM_BP_FAT	GO:0090288~negative regulation of cellular response to growth factor stimulus	4	3.80952	0.0577834	NGFR, CHST11, NBL1, AGT	96	185	20051	4.51599	1	0.529654	0.519399
	GOTERM_BP_FAT	GO:0098657~import into cell	4	3.80952	0.0577834	KCNK5, SLC1A3, ATP1A1, AGT	96	185	20051	4.51599	1	0.529654	0.519399
	GOTERM_BP_FAT	GO:0019221~cytokine-mediated signaling pathway	6	5.71429	0.0585486	CSF1R, CCL8, AXL, IL10RA, IGTP, SLIT3	96	441	20051	2.8417	1	0.53516	0.524799
	GOTERM_BP_FAT	GO:0071384~cellular response to corticosteroid stimulus	3	2.85714	0.0590301	ERRFI1, ZFP36, SGK1	96	83	20051	7.54932	1	0.538051	0.527633
	GOTERM_BP_FAT	GO:1903960~negative regulation of anion transmembrane transport	2	1.90476	0.0598895	OSR1, IRS2	96	13	20051	32.133	1	0.542842	0.532332
	GOTERM_BP_FAT	GO:0001542~ovulation from ovarian follicle	2	1.90476	0.0598895	PGR, AGT	96	13	20051	32.133	1	0.542842	0.532332
	GOTERM_BP_FAT	GO:0034637~cellular carbohydrate biosynthetic process	3	2.85714	0.0602884	ISYNA1, B3GALT2, IRS2	96	84	20051	7.45945	1	0.54494	0.534389
	GOTERM_BP_FAT	GO:0032640~tumor necrosis factor production	4	3.80952	0.0608228	ERRFI1, AXL, PTAFR, CYBB	96	189	20051	4.42041	1	0.548247	0.537633
	GOTERM_BP_FAT	GO:0001932~regulation of protein phosphorylation	13	12.381	0.0611037	NGFR, ERRFI1, CSF1R, CD300A, WWC1, BMP8A, PTPN13, MMP9, AGT, CCL8, IGTP, TMEM119, PTPN5	96	1546	20051	1.7563	1	0.549258	0.538624
	GOTERM_BP_FAT	GO:0043085~positive regulation of catalytic activity	11	10.4762	0.0613637	NET1, CSF1R, NGFR, CCL8, CD300A, AXL, PTAFR, IGTP, ATP2A1, RXFP1, AGT	96	1214	20051	1.89251	1	0.550075	0.539426
	GOTERM_BP_FAT	GO:0050678~regulation of epithelial cell proliferation	6	5.71429	0.0622618	NGFR, ERRFI1, ZFP36, OSR1, IRS2, PGR	96	449	20051	2.79106	1	0.556035	0.545269
	GOTERM_BP_FAT	GO:1904892~regulation of STAT cascade	4	3.80952	0.0623702	CSF1R, CD300A, IL10RA, AGT	96	191	20051	4.37413	1	0.556035	0.545269
	GOTERM_BP_FAT	GO:0043409~negative regulation of MAPK cascade	4	3.80952	0.0631508	ERRFI1, CD300A, PTPN5, AGT	96	192	20051	4.35135	1	0.559849	0.54901
	GOTERM_BP_FAT	GO:0035239~tube morphogenesis	6	5.71429	0.0632106	EMX2, CITED2, WT1, OSR1, PGR, AGT	96	451	20051	2.77869	1	0.559849	0.54901
	GOTERM_BP_FAT	GO:0002758~innate immune response-activating signal transduction	4	3.80952	0.0639359	FCNA, CD300A, IGTP, PIK3AP1	96	193	20051	4.3288	1	0.559849	0.54901
	GOTERM_BP_FAT	GO:1904064~positive regulation of cation transmembrane transport	4	3.80952	0.0639359	ATP2A1, ASIC2, AGT, TRDN	96	193	20051	4.3288	1	0.559849	0.54901
	GOTERM_BP_FAT	GO:0070997~neuron death	6	5.71429	0.0641677	C1QA, NGFR, AXL, FOS, PTPN5, AGT	96	453	20051	2.76642	1	0.559849	0.54901
	GOTERM_BP_FAT	GO:0042976~activation of Janus kinase activity	2	1.90476	0.0643465	CD300A, AGT	96	14	20051	29.8378	1	0.559849	0.54901
	GOTERM_BP_FAT	GO:1903961~positive regulation of anion transmembrane transport	2	1.90476	0.0643465	PTAFR, AGT	96	14	20051	29.8378	1	0.559849	0.54901
	GOTERM_BP_FAT	GO:0072075~metanephric mesenchyme development	2	1.90476	0.0643465	WT1, OSR1	96	14	20051	29.8378	1	0.559849	0.54901
	GOTERM_BP_FAT	GO:0009312~oligosaccharide biosynthetic process	2	1.90476	0.0643465	B3GALT2, ST6GALNAC5	96	14	20051	29.8378	1	0.559849	0.54901
	GOTERM_BP_FAT	GO:0030335~positive regulation of cell migration	7	6.66667	0.0650704	CSF1R, PTAFR, IRS2, PGR, MMP9, AGT, FBXO31	96	599	20051	2.44082	1	0.564638	0.553706
	GOTERM_BP_FAT	GO:0044092~negative regulation of molecular function	10	9.52381	0.0661977	ERRFI1, ZFP36, PTGIS, CD300A, OSR1, IRS2, SIK1, MMP9, PTPN5, AGT	96	1068	20051	1.95566	1	0.572805	0.561715
	GOTERM_BP_FAT	GO:0072078~nephron tubule morphogenesis	3	2.85714	0.0667158	WT1, OSR1, AGT	96	89	20051	7.04038	1	0.572805	0.561715
	GOTERM_BP_FAT	GO:0045670~regulation of osteoclast differentiation	3	2.85714	0.0667158	CSF1R, MAFB, FOS	96	89	20051	7.04038	1	0.572805	0.561715
	GOTERM_BP_FAT	GO:1902893~regulation of pri-miRNA transcription from RNA polymerase II promoter	3	2.85714	0.0667158	NGFR, WT1, FOS	96	89	20051	7.04038	1	0.572805	0.561715
	GOTERM_BP_FAT	GO:0035051~cardiocyte differentiation	4	3.80952	0.0671219	CITED2, WT1, SIK1, AGT	96	197	20051	4.24091	1	0.57355	0.562446
	GOTERM_BP_FAT	GO:0051338~regulation of transferase activity	9	8.57143	0.0671551	CSF1R, ERRFI1, ZFP36, CD300A, AXL, IGTP, IRS2, PTPN5, AGT	96	911	20051	2.06343	1	0.57355	0.562446
	GOTERM_BP_FAT	GO:0044262~cellular carbohydrate metabolic process	5	4.7619	0.0675097	ISYNA1, B3GALT2, PTAFR, IRS2, SIK1	96	323	20051	3.2332	1	0.57507	0.563936
	GOTERM_BP_FAT	GO:0030099~myeloid cell differentiation	6	5.71429	0.0685758	CSF1R, ZFP36, MAFB, CITED2, FOS, C1QC	96	462	20051	2.71253	1	0.577133	0.56596
	GOTERM_BP_FAT	GO:0040008~regulation of growth	8	7.61905	0.0686613	CITED2, FRZB, WT1, WWC1, SLIT3, SGK1, AGT, RERG	96	759	20051	2.20147	1	0.577133	0.56596
	GOTERM_BP_FAT	GO:0090287~regulation of cellular response to growth factor stimulus	5	4.7619	0.0687253	NGFR, CHST11, CITED2, NBL1, AGT	96	325	20051	3.2133	1	0.577133	0.56596
	GOTERM_BP_FAT	GO:0002262~myeloid cell homeostasis	4	3.80952	0.0687417	ZFP36, MAFB, CITED2, AXL	96	199	20051	4.19828	1	0.577133	0.56596
	GOTERM_BP_FAT	GO:2000018~regulation of male gonad development	2	1.90476	0.0687827	CITED2, WT1	96	15	20051	27.8486	1	0.577133	0.56596
	GOTERM_BP_FAT	GO:0048609~multicellular organismal reproductive process	11	10.4762	0.0692916	OXTR, PTGIS, CITED2, AXL, WT1, PTAFR, TMEM119, BMP8A, SLIT3, PGR, AGT	96	1242	20051	1.84985	1	0.577133	0.56596
	GOTERM_BP_FAT	GO:0002009~morphogenesis of an epithelium	7	6.66667	0.0693033	NGFR, CITED2, FRZB, WT1, OSR1, PGR, AGT	96	609	20051	2.40074	1	0.577133	0.56596
	GOTERM_BP_FAT	GO:0061614~pri-miRNA transcription from RNA polymerase II promoter	3	2.85714	0.0693482	NGFR, WT1, FOS	96	91	20051	6.88565	1	0.577133	0.56596
	GOTERM_BP_FAT	GO:0032890~regulation of organic acid transport	3	2.85714	0.0693482	OSR1, IRS2, AGT	96	91	20051	6.88565	1	0.577133	0.56596
	GOTERM_BP_FAT	GO:0090596~sensory organ morphogenesis	5	4.7619	0.0699522	MAFB, CITED2, FRZB, OSR1, RPL38	96	327	20051	3.19365	1	0.580675	0.569432
	GOTERM_BP_FAT	GO:0007259~JAK-STAT cascade	4	3.80952	0.0703794	CSF1R, CD300A, IL10RA, AGT	96	201	20051	4.15651	1	0.580766	0.569522
	GOTERM_BP_FAT	GO:0043604~amide biosynthetic process	9	8.57143	0.0705943	ZFP36, RPS27, RPS29, WT1, RPLP1, B3GALT2, PTAFR, RPL38, ST6GALNAC5	96	921	20051	2.04102	1	0.580766	0.569522
	GOTERM_BP_FAT	GO:0034103~regulation of tissue remodeling	3	2.85714	0.0706772	CSF1R, TMEM119, AGT	96	92	20051	6.8108	1	0.580766	0.569522
	GOTERM_BP_FAT	GO:0072088~nephron epithelium morphogenesis	3	2.85714	0.0706772	WT1, OSR1, AGT	96	92	20051	6.8108	1	0.580766	0.569522
	GOTERM_BP_FAT	GO:0051345~positive regulation of hydrolase activity	7	6.66667	0.0723601	NET1, NGFR, CCL8, CD300A, PTAFR, ATP2A1, AGT	96	616	20051	2.37346	1	0.593097	0.581615
	GOTERM_BP_FAT	GO:0045989~positive regulation of striated muscle contraction	2	1.90476	0.073198	ATP2A1, ATP1A1	96	16	20051	26.1081	1	0.595147	0.583624
	GOTERM_BP_FAT	GO:0035358~regulation of peroxisome proliferator activated receptor signaling pathway	2	1.90476	0.073198	PTGIS, CITED2	96	16	20051	26.1081	1	0.595147	0.583624
	GOTERM_BP_FAT	GO:0071674~mononuclear cell migration	3	2.85714	0.07336	CSF1R, CCL8, NBL1	96	94	20051	6.66589	1	0.595147	0.583624
	GOTERM_BP_FAT	GO:0061333~renal tubule morphogenesis	3	2.85714	0.07336	WT1, OSR1, AGT	96	94	20051	6.66589	1	0.595147	0.583624
	GOTERM_BP_FAT	GO:0001558~regulation of cell growth	6	5.71429	0.0736675	FRZB, WT1, SLIT3, SGK1, AGT, RERG	96	472	20051	2.65506	1	0.595147	0.583624
	GOTERM_BP_FAT	GO:0043902~positive regulation of multi-organism process	4	3.80952	0.0737075	CSF1R, OXTR, AXL, PTAFR	96	205	20051	4.07541	1	0.595147	0.583624
	GOTERM_BP_FAT	GO:0072028~nephron morphogenesis	3	2.85714	0.0747136	WT1, OSR1, AGT	96	95	20051	6.59572	1	0.601778	0.590127
	GOTERM_BP_FAT	GO:0043436~oxoacid metabolic process	10	9.52381	0.0755137	AHCY, PTGIS, VNN1, CHST11, P4HA3, SPOCK2, AKR1C14, SLC1A3, IRS2, AGT	96	1097	20051	1.90396	1	0.605716	0.593989
	GOTERM_BP_FAT	GO:0070371~ERK1 and ERK2 cascade	5	4.7619	0.075613	CSF1R, ERRFI1, OXTR, CCL8, AGT	96	336	20051	3.1081	1	0.605716	0.593989
	GOTERM_BP_FAT	GO:0032496~response to lipopolysaccharide	6	5.71429	0.0757611	ZFP36, AXL, IL10RA, PTAFR, IGTP, FOS	96	476	20051	2.63275	1	0.605716	0.593989
	GOTERM_BP_FAT	GO:2000147~positive regulation of cell motility	7	6.66667	0.0768607	CSF1R, PTAFR, IRS2, PGR, MMP9, AGT, FBXO31	96	626	20051	2.33555	1	0.613002	0.601134
	GOTERM_BP_FAT	GO:0060081~membrane hyperpolarization	2	1.90476	0.0775926	ATP1A1, AGT	96	17	20051	24.5723	1	0.615428	0.603513
	GOTERM_BP_FAT	GO:0072224~metanephric glomerulus development	2	1.90476	0.0775926	WT1, OSR1	96	17	20051	24.5723	1	0.615428	0.603513
	GOTERM_BP_FAT	GO:0043408~regulation of MAPK cascade	8	7.61905	0.0777323	CSF1R, NGFR, ERRFI1, CCL8, CD300A, WWC1, PTPN5, AGT	96	782	20051	2.13672	1	0.615428	0.603513
	GOTERM_BP_FAT	GO:0045765~regulation of angiogenesis	5	4.7619	0.0795124	NGFR, PTGIS, CYBB, MMP9, AGT	96	342	20051	3.05358	1	0.627134	0.614992
	GOTERM_BP_FAT	GO:0044255~cellular lipid metabolic process	10	9.52381	0.0795962	CSF1R, ISYNA1, PTGIS, AKR1C14, B3GALT2, IRS2, SIK1, HMGCS2, AGT, ST6GALNAC5	96	1109	20051	1.88336	1	0.627134	0.614992
	GOTERM_BP_FAT	GO:0045666~positive regulation of neuron differentiation	6	5.71429	0.0805896	NGFR, SGK1, PTPN5, NBL1, AGT, FBXO31	96	485	20051	2.58389	1	0.628867	0.616692
	GOTERM_BP_FAT	GO:0043549~regulation of kinase activity	8	7.61905	0.0810459	CSF1R, ERRFI1, CD300A, AXL, IGTP, IRS2, PTPN5, AGT	96	790	20051	2.11508	1	0.628867	0.616692
	GOTERM_BP_FAT	GO:1904063~negative regulation of cation transmembrane transport	3	2.85714	0.0816002	OSR1, MMP9, TRDN	96	100	20051	6.26594	1	0.628867	0.616692
	GOTERM_BP_FAT	GO:0007173~epidermal growth factor receptor signaling pathway	3	2.85714	0.0816002	ERRFI1, MMP9, AGT	96	100	20051	6.26594	1	0.628867	0.616692
	GOTERM_BP_FAT	GO:0008284~positive regulation of cell proliferation	10	9.52381	0.0816877	CSF1R, NGFR, OSR1, PTAFR, TMEM119, IRS2, PGR, FOLR2, MMP9, AGT	96	1115	20051	1.87322	1	0.628867	0.616692
	GOTERM_BP_FAT	GO:1905941~positive regulation of gonad development	2	1.90476	0.0819666	CITED2, WT1	96	18	20051	23.2072	1	0.628867	0.616692
	GOTERM_BP_FAT	GO:0072074~kidney mesenchyme development	2	1.90476	0.0819666	WT1, OSR1	96	18	20051	23.2072	1	0.628867	0.616692
	GOTERM_BP_FAT	GO:0048143~astrocyte activation	2	1.90476	0.0819666	C1QA, AGT	96	18	20051	23.2072	1	0.628867	0.616692
	GOTERM_BP_FAT	GO:1902563~regulation of neutrophil activation	2	1.90476	0.0819666	CD300A, PTAFR	96	18	20051	23.2072	1	0.628867	0.616692
	GOTERM_BP_FAT	GO:0006082~organic acid metabolic process	10	9.52381	0.0820396	AHCY, PTGIS, VNN1, CHST11, P4HA3, SPOCK2, AKR1C14, SLC1A3, IRS2, AGT	96	1116	20051	1.87155	1	0.628867	0.616692
	GOTERM_BP_FAT	GO:0043900~regulation of multi-organism process	6	5.71429	0.0822352	CSF1R, ZFP36, OXTR, CCL8, AXL, PTAFR	96	488	20051	2.56801	1	0.628867	0.616692
	GOTERM_BP_FAT	GO:0007519~skeletal muscle tissue development	4	3.80952	0.0823286	ACTA1, CITED2, FOS, MYH4	96	215	20051	3.88585	1	0.628867	0.616692
	GOTERM_BP_FAT	GO:2000241~regulation of reproductive process	4	3.80952	0.0823286	OXTR, CITED2, WT1, PTAFR	96	215	20051	3.88585	1	0.628867	0.616692
	GOTERM_BP_FAT	GO:0007389~pattern specification process	6	5.71429	0.0827877	EMX2, MAFB, CITED2, WT1, OSR1, NBL1	96	489	20051	2.56276	1	0.629565	0.617376
	GOTERM_BP_FAT	GO:0005975~carbohydrate metabolic process	7	6.66667	0.082946	ISYNA1, CHST11, B3GALT2, PTAFR, IRS2, SIK1, ST6GALNAC5	96	639	20051	2.28803	1	0.629565	0.617376
	GOTERM_BP_FAT	GO:0071347~cellular response to interleukin-1	3	2.85714	0.0830005	CCL8, PTGIS, SAA3	96	101	20051	6.2039	1	0.629565	0.617376
	GOTERM_BP_FAT	GO:0006469~negative regulation of protein kinase activity	4	3.80952	0.0832139	ERRFI1, CD300A, PTPN5, AGT	96	216	20051	3.86786	1	0.629716	0.617524
	GOTERM_BP_FAT	GO:0006935~chemotaxis	7	6.66667	0.0843878	CSF1R, NGFR, CCL8, SAA3, PTAFR, SLIT3, NBL1	96	642	20051	2.27734	1	0.637118	0.624783
	GOTERM_BP_FAT	GO:0007610~behavior	8	7.61905	0.0848715	OXTR, AHCY, SLC1A3, PGR, FOS, SGK1, PTPN5, AGT	96	799	20051	2.09126	1	0.638751	0.626385
	GOTERM_BP_FAT	GO:0097696~STAT cascade	4	3.80952	0.0849967	CSF1R, CD300A, IL10RA, AGT	96	218	20051	3.83238	1	0.638751	0.626385
	GOTERM_BP_FAT	GO:0002237~response to molecule of bacterial origin	6	5.71429	0.0855803	ZFP36, AXL, IL10RA, PTAFR, IGTP, FOS	96	494	20051	2.53682	1	0.641655	0.629232
	GOTERM_BP_FAT	GO:0051272~positive regulation of cellular component movement	7	6.66667	0.0858436	CSF1R, PTAFR, IRS2, PGR, MMP9, AGT, FBXO31	96	645	20051	2.26675	1	0.64215	0.629717
	GOTERM_BP_FAT	GO:0021542~dentate gyrus development	2	1.90476	0.0863201	CSF1R, EMX2	96	19	20051	21.9857	1	0.642759	0.630315
	GOTERM_BP_FAT	GO:0014061~regulation of norepinephrine secretion	2	1.90476	0.0863201	OXTR, AGT	96	19	20051	21.9857	1	0.642759	0.630315
	GOTERM_BP_FAT	GO:0042330~taxis	7	6.66667	0.0868219	CSF1R, NGFR, CCL8, SAA3, PTAFR, SLIT3, NBL1	96	647	20051	2.25974	1	0.645019	0.632531
	GOTERM_BP_FAT	GO:2000027~regulation of organ morphogenesis	4	3.80952	0.0877016	NGFR, CITED2, WT1, AGT	96	221	20051	3.78035	1	0.648593	0.636036
	GOTERM_BP_FAT	GO:1902107~positive regulation of leukocyte differentiation	4	3.80952	0.0877016	CSF1R, VNN1, AXL, FOS	96	221	20051	3.78035	1	0.648593	0.636036
	GOTERM_BP_FAT	GO:0046849~bone remodeling	3	2.85714	0.0886746	CSF1R, TMEM119, P3H4	96	105	20051	5.96756	1	0.651182	0.638574
	GOTERM_BP_FAT	GO:0021766~hippocampus development	3	2.85714	0.0886746	CSF1R, EMX2, AKR1C14	96	105	20051	5.96756	1	0.651182	0.638574
	GOTERM_BP_FAT	GO:0015844~monoamine transport	3	2.85714	0.0886746	OXTR, CD300A, AGT	96	105	20051	5.96756	1	0.651182	0.638574
	GOTERM_BP_FAT	GO:0051216~cartilage development	4	3.80952	0.0895251	CHST11, FRZB, OSR1, BMP8A	96	223	20051	3.74645	1	0.651182	0.638574
	GOTERM_BP_FAT	GO:0030522~intracellular receptor signaling pathway	4	3.80952	0.0895251	PTGIS, CITED2, IGTP, PGR	96	223	20051	3.74645	1	0.651182	0.638574
	GOTERM_BP_FAT	GO:0042326~negative regulation of phosphorylation	6	5.71429	0.089573	ERRFI1, CD300A, IRS2, PTPN13, PTPN5, AGT	96	501	20051	2.50137	1	0.651182	0.638574
	GOTERM_BP_FAT	GO:0032940~secretion by cell	9	8.57143	0.0898065	ANO1, OXTR, CCL8, CD300A, AXL, PTAFR, BMP8A, IRS2, AGT	96	972	20051	1.93393	1	0.651182	0.638574
	GOTERM_BP_FAT	GO:0014066~regulation of phosphatidylinositol 3-kinase signaling	3	2.85714	0.0901109	PTPN13, PIK3AP1, AGT	96	106	20051	5.91126	1	0.651182	0.638574
	GOTERM_BP_FAT	GO:0045638~negative regulation of myeloid cell differentiation	3	2.85714	0.0901109	ZFP36, MAFB, C1QC	96	106	20051	5.91126	1	0.651182	0.638574
	GOTERM_BP_FAT	GO:0006357~regulation of transcription from RNA polymerase II promoter	19	18.0952	0.090429	NGFR, EMX2, CEBPD, CITED2, WWC1, GM15446, OSR1, PTAFR, BMP8A, IRF2BP2, FOS, MYCL, ZFP36, MAFB, WT1, TXNIP, PGR, SIK1, NBL1	96	2734	20051	1.45151	1	0.651182	0.638574
	GOTERM_BP_FAT	GO:0072189~ureter development	2	1.90476	0.0906532	EMX2, OSR1	96	20	20051	20.8865	1	0.651182	0.638574
	GOTERM_BP_FAT	GO:0000028~ribosomal small subunit assembly	2	1.90476	0.0906532	RPS27, RPL38	96	20	20051	20.8865	1	0.651182	0.638574
	GOTERM_BP_FAT	GO:2000696~regulation of epithelial cell differentiation involved in kidney development	2	1.90476	0.0906532	OSR1, MMP9	96	20	20051	20.8865	1	0.651182	0.638574
	GOTERM_BP_FAT	GO:0040017~positive regulation of locomotion	7	6.66667	0.0923132	CSF1R, PTAFR, IRS2, PGR, MMP9, AGT, FBXO31	96	658	20051	2.22196	1	0.661646	0.648836
	GOTERM_BP_FAT	GO:0061469~regulation of type B pancreatic cell proliferation	2	1.90476	0.0949659	ERRFI1, IRS2	96	21	20051	19.8919	1	0.677078	0.66397
	GOTERM_BP_FAT	GO:0007379~segment specification	2	1.90476	0.0949659	MAFB, OSR1	96	21	20051	19.8919	1	0.677078	0.66397
	GOTERM_BP_FAT	GO:0032869~cellular response to insulin stimulus	4	3.80952	0.0950906	ERRFI1, IRS2, SGK1, AGT	96	229	20051	3.64829	1	0.677078	0.66397
	GOTERM_BP_FAT	GO:0072080~nephron tubule development	3	2.85714	0.0959244	WT1, OSR1, AGT	96	110	20051	5.69631	1	0.677089	0.66398
	GOTERM_BP_FAT	GO:0043502~regulation of muscle adaptation	3	2.85714	0.0959244	ERRFI1, TRPC3, AGT	96	110	20051	5.69631	1	0.677089	0.66398
	GOTERM_BP_FAT	GO:0006939~smooth muscle contraction	3	2.85714	0.0959244	OXTR, PTAFR, AGT	96	110	20051	5.69631	1	0.677089	0.66398
	GOTERM_BP_FAT	GO:0022602~ovulation cycle process	3	2.85714	0.0959244	SLIT3, PGR, AGT	96	110	20051	5.69631	1	0.677089	0.66398
	GOTERM_BP_FAT	GO:0006874~cellular calcium ion homeostasis	6	5.71429	0.096641	OXTR, CCL8, TRPC3, ATP2A1, AGT, TRDN	96	513	20051	2.44286	1	0.680402	0.667228
	GOTERM_BP_FAT	GO:0046942~carboxylic acid transport	5	4.7619	0.0968119	OSR1, SLC1A3, IRS2, FOLR2, AGT	96	367	20051	2.84557	1	0.680402	0.667228
	GOTERM_BP_FAT	GO:0003300~cardiac muscle hypertrophy	3	2.85714	0.0973943	ERRFI1, TRPC3, AGT	96	111	20051	5.64499	1	0.68302	0.669796
	GOTERM_BP_FAT	GO:0001657~ureteric bud development	3	2.85714	0.0988707	WT1, OSR1, AGT	96	112	20051	5.59459	1	0.689291	0.675946
	GOTERM_BP_FAT	GO:1903532~positive regulation of secretion by cell	5	4.7619	0.0989988	ANO1, OXTR, PTAFR, IRS2, AGT	96	370	20051	2.82249	1	0.689291	0.675946
	GOTERM_BP_FAT	GO:0015849~organic acid transport	5	4.7619	0.0989988	OSR1, SLC1A3, IRS2, FOLR2, AGT	96	370	20051	2.82249	1	0.689291	0.675946
	GOTERM_BP_FAT	GO:0001976~neurological system process involved in regulation of systemic arterial blood pressure	2	1.90476	0.0992583	ASIC2, AGT	96	22	20051	18.9877	1	0.689291	0.675946
	GOTERM_BP_FAT	GO:0007267~cell-cell signaling	13	12.381	0.0993478	NGFR, OXTR, BMP8A, SLC1A3, IRS2, STON2, MMP9, AGT, ANO1, CCL8, FRZB, PGR, PTPN5	96	1681	20051	1.61525	1	0.689291	0.675946
	GOTERM_CC_FAT	GO:0005602~complement component C1 complex	3	2.85714	0.000540468	C1QB, C1QA, C1QC	87	7	16713	82.33	0.132536	0.110492	0.109652
	GOTERM_CC_FAT	GO:0030017~sarcomere	7	6.66667	0.0010931	ACTA1, MYH1, CSRP2, ATP2A1, LDB3, FLNC, MYH4	87	226	16713	5.95011	0.249971	0.110492	0.109652
	GOTERM_CC_FAT	GO:0044449~contractile fiber part	7	6.66667	0.00139446	ACTA1, MYH1, CSRP2, ATP2A1, LDB3, FLNC, MYH4	87	237	16713	5.67394	0.307189	0.110492	0.109652
	GOTERM_CC_FAT	GO:0030016~myofibril	7	6.66667	0.00175558	ACTA1, MYH1, CSRP2, ATP2A1, LDB3, FLNC, MYH4	87	248	16713	5.42227	0.370055	0.110492	0.109652
	GOTERM_CC_FAT	GO:0043292~contractile fiber	7	6.66667	0.00210061	ACTA1, MYH1, CSRP2, ATP2A1, LDB3, FLNC, MYH4	87	257	16713	5.23239	0.424802	0.110492	0.109652
	GOTERM_CC_FAT	GO:0005581~collagen trimer	4	3.80952	0.00990317	C1QB, FCNA, C1QA, C1QC	87	86	16713	8.93504	0.927016	0.434089	0.430788
	GOTERM_CC_FAT	GO:0015629~actin cytoskeleton	8	7.61905	0.0193367	ACTA1, MYH1, AXL, HSPB7, ZYX, LDB3, FLNC, MYH4	87	530	16713	2.89967	0.994115	0.686364	0.681144
	GOTERM_CC_FAT	GO:0098794~postsynapse	10	9.52381	0.0221066	C1QB, C1QA, NGFR, RPS27, SLC1A3, RPL38, PGR, ATP1A1, ASIC2, C1QC	87	803	16713	2.39232	0.997203	0.686364	0.681144
	GOTERM_CC_FAT	GO:0022626~cytosolic ribosome	4	3.80952	0.0234877	RPS27, RPS29, RPLP1, RPL38	87	119	16713	6.45726	0.998071	0.686364	0.681144
	GOTERM_CC_FAT	GO:0044456~synapse part	12	11.4286	0.0462771	C1QB, C1QA, NGFR, RPS27, SLC1A3, RPL38, PGR, STON2, ATP1A1, ASIC2, PTPN5, C1QC	87	1213	16713	1.90045	0.999996	1	0.996183
	GOTERM_CC_FAT	GO:0031674~I band	4	3.80952	0.0495372	CSRP2, ATP2A1, LDB3, FLNC	87	160	16713	4.80259	0.999998	1	0.996183
	GOTERM_CC_FAT	GO:0031226~intrinsic component of plasma membrane	16	15.2381	0.0497234	KCNK5, CSF1R, SLC26A2, OXTR, TRPC3, IL10RA, SLC1A3, CYBB, ATP1A1, RXFP1, ANO1, ADGRD1, RASA3, AXL, FOLR2, ASIC2	87	1851	16713	1.66054	0.999999	1	0.996183
	GOTERM_CC_FAT	GO:0005783~endoplasmic reticulum	16	15.2381	0.0606427	NGFR, PTGIS, CYBB, ATP2A1, P3H4, FOS, ATP1A1, ANO5, TRDN, RPS29, P4HA3, IGTP, TMEM119, PGR, SGK1, PTPN5	87	1903	16713	1.61516	1	1	0.996183
	GOTERM_CC_FAT	GO:0001725~stress fiber	3	2.85714	0.0769052	ACTA1, ZYX, LDB3	87	89	16713	6.4754	1	1	0.996183
	GOTERM_CC_FAT	GO:0097517~contractile actin filament bundle	3	2.85714	0.0769052	ACTA1, ZYX, LDB3	87	89	16713	6.4754	1	1	0.996183
	GOTERM_CC_FAT	GO:0005615~extracellular space	17	16.1905	0.0844948	C1QB, C1QA, PTGIS, SAA3, BMP8A, PRG4, MUP22, MMP9, AGT, FCNA, CCL8, FRZB, AXL, IGKV1-110, SLIT3, NBL1, C1QC	87	2164	16713	1.50913	1	1	0.996183
	GOTERM_CC_FAT	GO:0044297~cell body	9	8.57143	0.0857515	ACTA1, NGFR, SLC1A3, CYBB, PGR, PTPN13, ASIC2, PTPN5, FBXO31	87	887	16713	1.94919	1	1	0.996183
	GOTERM_CC_FAT	GO:0044432~endoplasmic reticulum part	11	10.4762	0.0869281	PTGIS, RPS29, P4HA3, IGTP, TMEM119, CYBB, ATP2A1, SGK1, PTPN5, ANO5, TRDN	87	1197	16713	1.76536	1	1	0.996183
	GOTERM_CC_FAT	GO:0042641~actomyosin	3	2.85714	0.0906627	ACTA1, ZYX, LDB3	87	98	16713	5.88072	1	1	0.996183
	GOTERM_CC_FAT	GO:0032432~actin filament bundle	3	2.85714	0.0906627	ACTA1, ZYX, LDB3	87	98	16713	5.88072	1	1	0.996183
	GOTERM_CC_FAT	GO:0016528~sarcoplasm	3	2.85714	0.096994	ATP2A1, FLNC, TRDN	87	102	16713	5.6501	1	1	0.996183
	GOTERM_CC_FAT	GO:0044391~ribosomal subunit	4	3.80952	0.0981733	RPS27, RPS29, RPLP1, RPL38	87	214	16713	3.59072	1	1	0.996183
	GOTERM_MF_FAT	GO:0043548~phosphatidylinositol 3-kinase binding	5	4.7619	6.03207e-05	AXL, IRS2, ATP1A1, PTPN13, PIK3AP1	93	42	18102	23.172	0.0292426	0.0296778	0.0296778
	GOTERM_MF_FAT	GO:0022839~ion gated channel activity	4	3.80952	0.00175222	ANO1, TRPC3, ASIC2, ANO5	93	47	18102	16.5655	0.578042	0.431047	0.431047
	GOTERM_MF_FAT	GO:0019900~kinase binding	12	11.4286	0.00531255	ERRFI1, ZFP36, PARD6B, WWC1, PTAFR, IGTP, LDB3, IRS2, SIK1, ATP1A1, SGK1, PTPN5	93	888	18102	2.63034	0.927251	0.711346	0.711346
	GOTERM_MF_FAT	GO:0019901~protein kinase binding	11	10.4762	0.00693691	ERRFI1, ZFP36, PARD6B, PTAFR, IGTP, LDB3, IRS2, SIK1, ATP1A1, SGK1, PTPN5	93	793	18102	2.7	0.967446	0.711346	0.711346
	GOTERM_MF_FAT	GO:0022836~gated channel activity	7	6.66667	0.00722912	KCNK5, ANO1, TRPC3, RASA3, CYBB, ASIC2, ANO5	93	335	18102	4.06721	0.971834	0.711346	0.711346
	GOTERM_MF_FAT	GO:0042562~hormone binding	4	3.80952	0.0108539	OXTR, PGR, ATP1A1, RXFP1	93	90	18102	8.6509	0.995343	0.869486	0.869486
	GOTERM_MF_FAT	GO:0043167~ion binding	44	41.9048	0.014322	CSF1R, AHCY, BNC2, PTAFR, SLC1A3, LDB3, ATP2A1, ATP1A1, RXFP1, RERG, FCNA, ZFP36, CSRP2, CCL8, SPOCK2, SLIT3, CAR12, PTGIS, TRPC3, CD300A, GM15446, OSR1, CYBB, IRF2BP2, MMP9, ACTA1, ANO1, MYH1, CYP4F17, RPS27, VNN1, RASA3, WT1, RPS29, AXL, P4HA3, AKR1C14, ZYX, IGTP, SIK1, PGR, FOLR2, MYH4, SGK1	93	6366	18102	1.34533	0.999173	0.869486	0.869486
	GOTERM_MF_FAT	GO:0008324~cation transmembrane transporter activity	9	8.57143	0.0153263	KCNK5, ANO1, TRPC3, RASA3, ATP5K, SLC1A3, ATP2A1, ATP1A1, ASIC2	93	634	18102	2.7631	0.999499	0.869486	0.869486
	GOTERM_MF_FAT	GO:0022890~inorganic cation transmembrane transporter activity	8	7.61905	0.0159052	KCNK5, TRPC3, RASA3, ATP5K, SLC1A3, ATP2A1, ATP1A1, ASIC2	93	515	18102	3.02361	0.999625	0.869486	0.869486
	GOTERM_MF_FAT	GO:0046873~metal ion transmembrane transporter activity	7	6.66667	0.0197508	KCNK5, TRPC3, RASA3, SLC1A3, ATP2A1, ATP1A1, ASIC2	93	418	18102	3.25961	0.999945	0.900595	0.900595
	GOTERM_MF_FAT	GO:0005216~ion channel activity	7	6.66667	0.0201667	KCNK5, ANO1, TRPC3, RASA3, CYBB, ASIC2, ANO5	93	420	18102	3.24409	0.999956	0.900595	0.900595
	GOTERM_MF_FAT	GO:0022838~substrate-specific channel activity	7	6.66667	0.0225614	KCNK5, ANO1, TRPC3, RASA3, CYBB, ASIC2, ANO5	93	431	18102	3.16129	0.999987	0.900595	0.900595
	GOTERM_MF_FAT	GO:0022853~active ion transmembrane transporter activity	4	3.80952	0.0258706	ATP5K, SLC1A3, ATP2A1, ATP1A1	93	125	18102	6.22865	0.999997	0.900595	0.900595
	GOTERM_MF_FAT	GO:0015077~monovalent inorganic cation transmembrane transporter activity	6	5.71429	0.0286808	KCNK5, ATP5K, SLC1A3, ATP2A1, ATP1A1, ASIC2	93	337	18102	3.46549	0.999999	0.900595	0.900595
	GOTERM_MF_FAT	GO:0015267~channel activity	7	6.66667	0.0308805	KCNK5, ANO1, TRPC3, RASA3, CYBB, ASIC2, ANO5	93	464	18102	2.93646	1	0.900595	0.900595
	GOTERM_MF_FAT	GO:0022803~passive transmembrane transporter activity	7	6.66667	0.0308805	KCNK5, ANO1, TRPC3, RASA3, CYBB, ASIC2, ANO5	93	464	18102	2.93646	1	0.900595	0.900595
	GOTERM_MF_FAT	GO:0031406~carboxylic acid binding	5	4.7619	0.0314529	FCNA, P4HA3, AKR1C14, SLC1A3, FOLR2	93	234	18102	4.15908	1	0.900595	0.900595
	GOTERM_MF_FAT	GO:0071889~14-3-3 protein binding	3	2.85714	0.0329486	ZFP36, IRS2, SIK1	93	56	18102	10.4274	1	0.900595	0.900595
	GOTERM_MF_FAT	GO:0043177~organic acid binding	5	4.7619	0.0376978	FCNA, P4HA3, AKR1C14, SLC1A3, FOLR2	93	248	18102	3.9243	1	0.959996	0.959996
	GOTERM_MF_FAT	GO:0019955~cytokine binding	4	3.80952	0.0390242	CSF1R, ZFP36, IL10RA, NBL1	93	147	18102	5.29647	1	0.959996	0.959996
	GOTERM_MF_FAT	GO:0043168~anion binding	23	21.9048	0.0440935	CSF1R, TRPC3, CD300A, PTAFR, SLC1A3, CYBB, ATP2A1, ATP1A1, RERG, FCNA, ACTA1, MYH1, CCL8, VNN1, AXL, P4HA3, AKR1C14, IGTP, SLIT3, SIK1, FOLR2, SGK1, MYH4	93	3000	18102	1.49228	1	1	1
	GOTERM_MF_FAT	GO:0019829~cation-transporting ATPase activity	3	2.85714	0.049376	ATP5K, ATP2A1, ATP1A1	93	70	18102	8.34194	1	1	1
	GOTERM_MF_FAT	GO:0042625~ATPase coupled ion transmembrane transporter activity	3	2.85714	0.0532124	ATP5K, ATP2A1, ATP1A1	93	73	18102	7.99912	1	1	1
	GOTERM_MF_FAT	GO:0036312~phosphatidylinositol 3-kinase regulatory subunit binding	2	1.90476	0.064113	PTPN13, PIK3AP1	93	13	18102	29.9454	1	1	1
	GOTERM_MF_FAT	GO:0046872~metal ion binding	29	27.619	0.0651887	AHCY, BNC2, SLC1A3, LDB3, ATP2A1, ATP1A1, RXFP1, FCNA, ZFP36, CSRP2, SPOCK2, SLIT3, CAR12, PTGIS, GM15446, OSR1, CYBB, IRF2BP2, MMP9, ANO1, CYP4F17, RPS27, RASA3, WT1, RPS29, P4HA3, ZYX, SIK1, PGR	93	4190	18102	1.34719	1	1	1
	GOTERM_MF_FAT	GO:0003735~structural constituent of ribosome	4	3.80952	0.0699821	RPS27, RPS29, RPLP1, RPL38	93	187	18102	4.16353	1	1	1
	GOTERM_MF_FAT	GO:0005261~cation channel activity	5	4.7619	0.0746807	KCNK5, ANO1, TRPC3, RASA3, ASIC2	93	312	18102	3.11931	1	1	1
	GOTERM_MF_FAT	GO:0036094~small molecule binding	20	19.0476	0.0809058	CSF1R, AHCY, TRPC3, SLC1A3, CYBB, ATP2A1, ATP1A1, MUP22, RERG, FCNA, ACTA1, MYH1, AXL, P4HA3, AKR1C14, IGTP, SIK1, FOLR2, SGK1, MYH4	93	2685	18102	1.44987	1	1	1
	GOTERM_MF_FAT	GO:0005244~voltage-gated ion channel activity	4	3.80952	0.0809131	KCNK5, ANO1, CYBB, ASIC2	93	199	18102	3.91247	1	1	1
	GOTERM_MF_FAT	GO:0022832~voltage-gated channel activity	4	3.80952	0.0818559	KCNK5, ANO1, CYBB, ASIC2	93	200	18102	3.8929	1	1	1
	GOTERM_MF_FAT	GO:0043169~cation binding	29	27.619	0.0823359	AHCY, BNC2, SLC1A3, LDB3, ATP2A1, ATP1A1, RXFP1, FCNA, ZFP36, CSRP2, SPOCK2, SLIT3, CAR12, PTGIS, GM15446, OSR1, CYBB, IRF2BP2, MMP9, ANO1, CYP4F17, RPS27, RASA3, WT1, RPS29, P4HA3, ZYX, SIK1, PGR	93	4285	18102	1.31732	1	1	1
	GOTERM_MF_FAT	GO:0019899~enzyme binding	18	17.1429	0.0866287	NGFR, ERRFI1, CSF1R, CITED2, CD300A, WWC1, PTAFR, LDB3, IRS2, ATP1A1, ZFP36, PARD6B, IGTP, TXNIP, PGR, SIK1, SGK1, PTPN5	93	2365	18102	1.48144	1	1	1
	GOTERM_MF_FAT	GO:0061778~intracellular chloride channel activity	2	1.90476	0.0923155	ANO1, ANO5	93	19	18102	20.489	1	1	1
	GOTERM_MF_FAT	GO:0005229~intracellular calcium activated chloride channel activity	2	1.90476	0.0923155	ANO1, ANO5	93	19	18102	20.489	1	1	1
	KEGG_PATHWAY	mmu05171:Coronavirus disease - COVID-19	9	8.57143	0.000220336	C1QB, C1QA, RPS27, RPS29, RPLP1, CYBB, RPL38, FOS, C1QC	61	248	8998	5.35312	0.0335791	0.0343724	0.0343724
	KEGG_PATHWAY	mmu05133:Pertussis	4	3.80952	0.0145411	C1QB, C1QA, FOS, C1QC	61	77	8998	7.66276	0.896731	1	1
	KEGG_PATHWAY	mmu05142:Chagas disease	4	3.80952	0.0311432	C1QB, C1QA, FOS, C1QC	61	103	8998	5.72847	0.992583	1	1
	KEGG_PATHWAY	mmu05150:Staphylococcus aureus infection	4	3.80952	0.0535489	C1QB, C1QA, PTAFR, C1QC	61	128	8998	4.60963	0.999803	1	1

## Sheet: AV vs CVdeg ∩ OV vs CVnondeg
	Category	Term	Count	%	PValue	Genes	List Total	Pop Hits	Pop Total	Fold Enrichment	Bonferroni	Benjamini	FDR
up regulated	GOTERM_BP_FAT	GO:0055114~oxidation-reduction process	87	15.6757	2.36543e-45	MT-ND4L, ACADVL, MTCH2, ABCD3, MT-CO1, COX4I1, GBE1, ECI1, NDUFA10, PYGL, MTFR1L, ENO1, COX6A1, MT-ND1, GPI1, GYS1, GYG, ACADL, AKT2, LEPR, IDH3B, UQCRFS1, DLAT, ACADM, PGM1, CBR2, COX8B, DGAT1, SDHD, SDHA, MUP3, HADHB, HADHA, CYP2D22, PKM, NDUFS8, ACOX2, G6PDX, UQCRC1, NDUFS2, NDUFS1, UQCRC2, ALDOA, DLD, NDUFB9, NDUFB5, DLST, ACAA1B, PDHB, UQCR10, HSD17B10, COX5A, ACACB, UQCRH, ACAT2, PRDX3, UGP…	514	515	20051	6.58999	1.3095e-41	1.30927e-41	1.23854e-41
	GOTERM_BP_FAT	GO:0019752~carboxylic acid metabolic process	116	20.9009	6.57532e-44	PECR, SLC27A1, MTCH2, ACSM3, ECI1, ACSM5, ENO1, FADS2, MPC1, MPC2, AKT2, LIPG, SEPHS2, SLC25A44, PDK2, FADS1, PDK1, PDHX, DGAT1, ACSL1, PRKCE, ENTPD5, SDHD, ACSL3, SDHA, PGD, ACLY, CYP2D22, ACOT2, ACOT1, ADTRP, NUPR1, ACOT4, ACOT3, PTGES, INSIG1, MGST2, ABHD5, ACACB, ACAT2, ACACA, LDHD, PGK1, PRODH, PPARGC1A, ACBD4, PDHA1, MYO5A, MCAT, ACSF2, CS, MLXIPL, GRHPR, FASN, CYP1A1, OGDH, ECHDC1, ACO1, A…	514	1003	20051	4.51159	3.6401e-40	1.70635e-40	1.61418e-40
	GOTERM_BP_FAT	GO:0009117~nucleotide metabolic process	94	16.9369	9.24853e-44	MT-ND4L, COX7B, MTCH2, MT-CO1, GDA, PANK1, COX4I1, NDUFA10, RORA, ATP5G3, ENO1, COX6A1, KHK, MT-ND1, GPI1, MPC1, MPC2, NAMPT, ME1, IDH3B, UQCRFS1, ME2, DLAT, PGLS, ENTPD4B, CBR2, PDHX, COX8B, PDE4D, ENTPD5, PGAM1, TALDO1, SDHD, SDHA, PGD, COASY, PKM, NDUFS8, STIM1, GPD2, DPYD, G6PDX, UQCRC1, NDUFS2, NDUFS1, UQCRC2, NUPR1, ALDOA, TKT, MOCS1, DLD, NDUFB9, PRKAA2, NDUFB5, ATP5A1, DLST, PDHB, UQCR10,…	514	641	20051	5.72062	5.11999e-40	1.70635e-40	1.61418e-40
	GOTERM_BP_FAT	GO:0019637~organophosphate metabolic process	121	21.8018	1.51091e-43	MT-ND4L, SLC27A1, MTCH2, MT-CO1, GDA, PANK1, NDUFA10, GDE1, RORA, ENO1, COX6A1, MT-ND1, MPC1, MPC2, NAMPT, TMEM38B, ENTPD4B, PDHX, PCYT2, ENTPD5, TALDO1, SDHD, ACSL3, SDHA, PGD, BSCL2, STIM1, GPD2, UQCRC1, PGP, UQCRC2, NUPR1, IDI1, ABHD5, ATP5O, UQCRH, ATP5L, HSD11B1, ATP5B, PPCS, LDHD, PMVK, PGK1, CYC1, DRD1, NDUFV2, PPARGC1A, NDUFV1, FDFT1, PDHA1, CHCHD10, COQ9, ADCY10, MLXIPL, UCK1, UQCRQ, OGD…	514	1103	20051	4.2794	8.36438e-40	2.09072e-40	1.97778e-40
	GOTERM_BP_FAT	GO:0006753~nucleoside phosphate metabolic process	94	16.9369	2.35998e-43	MT-ND4L, COX7B, MTCH2, MT-CO1, GDA, PANK1, COX4I1, NDUFA10, RORA, ATP5G3, ENO1, COX6A1, KHK, MT-ND1, GPI1, MPC1, MPC2, NAMPT, ME1, IDH3B, UQCRFS1, ME2, DLAT, PGLS, ENTPD4B, CBR2, PDHX, COX8B, PDE4D, ENTPD5, PGAM1, TALDO1, SDHD, SDHA, PGD, COASY, PKM, NDUFS8, STIM1, GPD2, DPYD, G6PDX, UQCRC1, NDUFS2, NDUFS1, UQCRC2, NUPR1, ALDOA, TKT, MOCS1, DLD, NDUFB9, PRKAA2, NDUFB5, ATP5A1, DLST, PDHB, UQCR10,…	514	648	20051	5.65882	1.30648e-39	2.6125e-40	2.47137e-40
	GOTERM_BP_FAT	GO:0006091~generation of precursor metabolites and energy	78	14.0541	2.35473e-42	MT-ND4L, COX7B, MTCH2, MT-CO1, COX4I1, GBE1, NDUFA10, CISD1, PYGL, MTFR1L, ENO1, COX6A1, KHK, MT-ND1, GPI1, GYS1, GYG, AKT2, LEPR, IDH3B, UQCRFS1, DLAT, ACADM, PRKACA, PGM1, COX8B, ENTPD5, PGAM1, SDHD, SDHA, MUP3, PKM, NDUFS8, UQCRC1, NDUFS2, NDUFS1, UQCRC2, NUPR1, ALDOA, DLD, NDUFB9, PRKAA2, NDUFB5, DLST, PDHB, UQCR10, COX5A, UQCRH, UGP2, PGK1, CYC1, NDUFV2, SLC25A22, PPARGC1A, NDUFV1, NDUFA9, P…	514	436	20051	6.9788	1.30358e-38	2.17224e-39	2.0549e-39
	GOTERM_BP_FAT	GO:0051186~cofactor metabolic process	79	14.2342	8.63447e-42	VKORC1L1, ISCA1, MTCH2, ACSM3, PANK1, ACSM5, ENO1, KHK, GPI1, MPC1, MPC2, NAMPT, ME1, IDH3B, ME2, DLAT, PGLS, PDK2, PDK1, TMEM14C, CBR2, PDHX, DGAT1, GLRX3, ACSL1, ELOVL5, ENTPD5, GLRX5, PGAM1, ELOVL3, TALDO1, ELOVL6, ACSL3, PGD, COASY, ACLY, PKM, GPD2, G6PDX, ACOT2, ACOT1, MVD, NUPR1, ALDOA, TKT, MOCS1, DLD, ACOT4, ACOT3, PRKAA2, DLST, FITM2, PDHB, ACACB, ACACA, HSD11B1, PPCS, PMVK, PGK1, PPARGC…	514	457	20051	6.74348	4.78005e-38	6.8274e-39	6.45859e-39
	GOTERM_BP_FAT	GO:0055086~nucleobase-containing small molecule metabolic process	94	16.9369	1.8738e-41	MT-ND4L, COX7B, MTCH2, MT-CO1, GDA, PANK1, COX4I1, NDUFA10, RORA, ATP5G3, ENO1, COX6A1, KHK, MT-ND1, GPI1, MPC1, MPC2, NAMPT, ME1, IDH3B, UQCRFS1, ME2, DLAT, PGLS, ENTPD4B, CBR2, PDHX, COX8B, PDE4D, ENTPD5, PGAM1, TALDO1, SDHD, SDHA, PGD, COASY, PKM, NDUFS8, STIM1, GPD2, DPYD, G6PDX, UQCRC1, NDUFS2, NDUFS1, UQCRC2, NUPR1, ALDOA, TKT, MOCS1, DLD, NDUFB9, PRKAA2, NDUFB5, ATP5A1, DLST, PDHB, UQCR10,…	514	682	20051	5.37671	1.03734e-37	1.29644e-38	1.2264e-38
	GOTERM_BP_FAT	GO:0043436~oxoacid metabolic process	117	21.0811	8.90127e-41	PECR, SLC27A1, MTCH2, ACSM3, ECI1, ACSM5, ENO1, FADS2, MPC1, MPC2, AKT2, LIPG, SEPHS2, SLC25A44, PDK2, FADS1, PDK1, PDHX, DGAT1, ACSL1, PRKCE, ENTPD5, SDHD, ACSL3, SDHA, PGD, ACLY, CYP2D22, ACOT2, ACOT1, ADTRP, NUPR1, ACOT4, ACOT3, PTGES, INSIG1, MGST2, ABHD5, ACACB, ACAT2, ACACA, LDHD, PGK1, PRODH, PPARGC1A, ACBD4, PDHA1, MYO5A, MCAT, ACSF2, CS, MLXIPL, GRHPR, FASN, CYP1A1, OGDH, ECHDC1, ACO1, A…	514	1097	20051	4.16056	4.92774e-37	5.47428e-38	5.17856e-38
	GOTERM_BP_FAT	GO:0006082~organic acid metabolic process	117	21.0811	4.87674e-40	PECR, SLC27A1, MTCH2, ACSM3, ECI1, ACSM5, ENO1, FADS2, MPC1, MPC2, AKT2, LIPG, SEPHS2, SLC25A44, PDK2, FADS1, PDK1, PDHX, DGAT1, ACSL1, PRKCE, ENTPD5, SDHD, ACSL3, SDHA, PGD, ACLY, CYP2D22, ACOT2, ACOT1, ADTRP, NUPR1, ACOT4, ACOT3, PTGES, INSIG1, MGST2, ABHD5, ACACB, ACAT2, ACACA, LDHD, PGK1, PRODH, PPARGC1A, ACBD4, PDHA1, MYO5A, MCAT, ACSF2, CS, MLXIPL, GRHPR, FASN, CYP1A1, OGDH, ECHDC1, ACO1, A…	514	1116	20051	4.08973	2.69976e-36	2.69928e-37	2.55346e-37
	GOTERM_BP_FAT	GO:0006732~coenzyme metabolic process	70	12.6126	1.55611e-39	MTCH2, ACSM3, PANK1, ACSM5, ENO1, KHK, GPI1, MPC1, MPC2, NAMPT, ME1, IDH3B, ME2, DLAT, PGLS, PDK2, PDK1, CBR2, PDHX, DGAT1, ACSL1, ELOVL5, ENTPD5, PGAM1, ELOVL3, TALDO1, ELOVL6, ACSL3, PGD, COASY, ACLY, PKM, GPD2, G6PDX, ACOT2, ACOT1, MVD, NUPR1, ALDOA, TKT, MOCS1, DLD, ACOT4, ACOT3, PRKAA2, DLST, FITM2, PDHB, ACACB, ACACA, HSD11B1, PPCS, PMVK, PGK1, PPARGC1A, NDUFA9, PDHA1, MDH1, MDH2, IDH3G, FM…	514	370	20051	7.38022	8.61463e-36	7.83006e-37	7.40708e-37
	GOTERM_BP_FAT	GO:0032787~monocarboxylic acid metabolic process	92	16.5766	1.00106e-38	PECR, SLC27A1, ACADVL, MTCH2, DAGLA, ABCD3, ACSM3, ECI1, TECR, ACSM5, ENO1, AACS, KHK, GPI1, FADS2, ACADL, MPC1, AKT2, MPC2, LIPG, ME1, ME2, SCD1, DLAT, ACADM, PDK2, FADS1, PDK1, PDHX, SREBF1, DGAT1, GPX4, ACSL1, ELOVL5, PRKCE, ENTPD5, PGAM1, ELOVL3, ELOVL6, ACSL3, PGD, HADHB, ACLY, HADHA, CYP2D22, PKM, ACOX2, ASPG, ACOT2, ACOT1, ADTRP, NUPR1, ALDOA, DLD, ACOT4, ACOT3, PTGES, PRKAA2, PCX, INSIG1,…	514	702	20051	5.11239	5.54189e-35	4.61741e-36	4.36797e-36
	GOTERM_BP_FAT	GO:0015980~energy derivation by oxidation of organic compounds	61	10.991	8.68379e-36	MT-ND4L, MTCH2, MT-CO1, COX4I1, GBE1, NDUFA10, PYGL, MTFR1L, COX6A1, MT-ND1, GYS1, GYG, AKT2, LEPR, IDH3B, UQCRFS1, DLAT, ACADM, PGM1, COX8B, SDHD, SDHA, MUP3, NDUFS8, UQCRC1, NDUFS2, NDUFS1, UQCRC2, DLD, NDUFB9, NDUFB5, DLST, PDHB, UQCR10, COX5A, UQCRH, UGP2, CYC1, NDUFV2, SLC25A22, PPARGC1A, NDUFV1, NDUFA9, PDHA1, NDUFA6, MDH1, MDH2, IDH3G, AGL, COQ9, SOD2, CS, PINK1, PPP1R1A, UQCRQ, OGDH, CYCS…	514	305	20051	7.80195	4.80735e-32	3.69729e-33	3.49756e-33
	GOTERM_BP_FAT	GO:0019693~ribose phosphate metabolic process	77	13.8739	2.69241e-35	MT-ND4L, COX7B, MTCH2, MT-CO1, GDA, PANK1, COX4I1, NDUFA10, RORA, PYGL, ATP5G3, ENO1, COX6A1, KHK, MT-ND1, GPI1, UQCRFS1, PGLS, ENTPD4B, COX8B, PDE4D, ENTPD5, PGAM1, TALDO1, SDHD, SDHA, PGD, COASY, PKM, NDUFS8, STIM1, DPYD, G6PDX, UQCRC1, NDUFS2, NDUFS1, UQCRC2, NUPR1, ALDOA, TKT, MOCS1, DLD, NDUFB9, PRKAA2, NDUFB5, ATP5A1, UQCR10, ATP5O, COX5A, UQCRH, ATP5L, ATP5B, PPCS, LDHD, PGK1, CYC1, DRD1, …	514	530	20051	5.66745	1.49052e-31	1.06446e-32	1.00696e-32
	GOTERM_BP_FAT	GO:0009199~ribonucleoside triphosphate metabolic process	60	10.8108	4.67785e-32	MT-ND4L, COX7B, MTCH2, MT-CO1, COX4I1, NDUFA10, ATP5G3, ENO1, COX6A1, KHK, MT-ND1, GPI1, UQCRFS1, ENTPD4B, COX8B, ENTPD5, PGAM1, SDHD, SDHA, PKM, NDUFS8, UQCRC1, NDUFS2, NDUFS1, UQCRC2, NUPR1, ALDOA, MOCS1, DLD, NDUFB9, PRKAA2, NDUFB5, ATP5A1, UQCR10, ATP5O, COX5A, UQCRH, ATP5L, ATP5B, LDHD, PGK1, CYC1, NDUFV2, PPARGC1A, NDUFV1, NDUFA9, NDUFA6, ATP5PB, CHCHD10, APOC3, COQ9, MLXIPL, GALE, PINK1, U…	514	340	20051	6.88407	2.58966e-28	1.72613e-29	1.63288e-29
	GOTERM_BP_FAT	GO:0046034~ATP metabolic process	57	10.2703	5.07557e-32	MT-ND4L, COX7B, MTCH2, MT-CO1, COX4I1, NDUFA10, ATP5G3, ENO1, COX6A1, KHK, MT-ND1, GPI1, UQCRFS1, COX8B, ENTPD5, PGAM1, SDHD, SDHA, PKM, NDUFS8, UQCRC1, NDUFS2, NDUFS1, UQCRC2, NUPR1, ALDOA, DLD, NDUFB9, PRKAA2, NDUFB5, ATP5A1, UQCR10, ATP5O, COX5A, UQCRH, ATP5L, ATP5B, LDHD, PGK1, CYC1, NDUFV2, PPARGC1A, NDUFV1, NDUFA9, NDUFA6, ATP5PB, CHCHD10, APOC3, COQ9, MLXIPL, GALE, PINK1, UQCRQ, OGDH, CYCS…	514	302	20051	7.36276	2.80984e-28	1.75583e-29	1.66098e-29
	GOTERM_BP_FAT	GO:0045333~cellular respiration	49	8.82883	2.01359e-31	MT-ND4L, MTCH2, MT-CO1, COX4I1, NDUFA10, MTFR1L, COX6A1, MT-ND1, IDH3B, UQCRFS1, DLAT, COX8B, SDHD, SDHA, MUP3, NDUFS8, UQCRC1, NDUFS2, NDUFS1, UQCRC2, DLD, NDUFB9, NDUFB5, DLST, PDHB, UQCR10, COX5A, UQCRH, CYC1, NDUFV2, SLC25A22, PPARGC1A, NDUFV1, NDUFA9, PDHA1, NDUFA6, MDH1, MDH2, IDH3G, COQ9, SOD2, CS, PINK1, UQCRQ, OGDH, CYCS, ACO1, MT-CYTB, ACO2	514	215	20051	8.89059	1.11472e-27	6.556e-29	6.20185e-29
	GOTERM_BP_FAT	GO:0009259~ribonucleotide metabolic process	71	12.7928	3.90028e-31	MT-ND4L, COX7B, MTCH2, MT-CO1, GDA, PANK1, COX4I1, NDUFA10, RORA, ATP5G3, ENO1, COX6A1, KHK, MT-ND1, GPI1, UQCRFS1, ENTPD4B, COX8B, PDE4D, ENTPD5, PGAM1, SDHD, SDHA, COASY, PKM, NDUFS8, STIM1, DPYD, UQCRC1, NDUFS2, NDUFS1, UQCRC2, NUPR1, ALDOA, MOCS1, DLD, NDUFB9, PRKAA2, NDUFB5, ATP5A1, UQCR10, ATP5O, COX5A, UQCRH, ATP5L, ATP5B, PPCS, LDHD, PGK1, CYC1, DRD1, NDUFV2, PPARGC1A, NDUFV1, NDUFA9, NDU…	514	513	20051	5.39901	2.1592e-27	1.19934e-28	1.13455e-28
	GOTERM_BP_FAT	GO:0009161~ribonucleoside monophosphate metabolic process	60	10.8108	5.35351e-31	MT-ND4L, COX7B, MTCH2, MT-CO1, GDA, COX4I1, NDUFA10, ATP5G3, ENO1, COX6A1, KHK, MT-ND1, GPI1, UQCRFS1, COX8B, ENTPD5, PGAM1, SDHD, SDHA, PKM, NDUFS8, DPYD, UQCRC1, NDUFS2, NDUFS1, UQCRC2, NUPR1, ALDOA, DLD, NDUFB9, PRKAA2, NDUFB5, ATP5A1, UQCR10, ATP5O, COX5A, UQCRH, ATP5L, ATP5B, LDHD, PGK1, CYC1, NDUFV2, PPARGC1A, NDUFV1, NDUFA9, NDUFA6, ATP5PB, CHCHD10, APOC3, COQ9, MLXIPL, GALE, PINK1, UCK1, …	514	355	20051	6.59319	2.9637e-27	1.55956e-28	1.47531e-28
	GOTERM_BP_FAT	GO:0006629~lipid metabolic process	122	21.982	6.56192e-31	PECR, SLC27A1, ACSM3, ECI1, GDE1, RORC, ACSM5, RORA, MSMO1, TSKU, TM7SF2, FADS2, NSDHL, AKT2, LIPG, LEPR, TMEM38B, PDK2, FADS1, PDK1, PCYT2, DGAT1, ACSL1, PRKCE, ACSL3, BSCL2, ACLY, RBP4, CYP2D22, PGP, ACOT2, ACOT1, ADTRP, ACOT4, ACOT3, PTGES, IDI1, INSIG1, MGST2, ABHD5, ACACB, ACAT2, ACACA, HSD11B1, SULT1A1, ALDH3B2, ATP5B, CYB5R3, RDH11, PMVK, APOD, ST3GAL6, PPARGC1A, FDFT1, ACBD4, CIDEA, MYO5A…	514	1503	20051	3.16646	3.63268e-27	1.81601e-28	1.71791e-28
	GOTERM_BP_FAT	GO:0009205~purine ribonucleoside triphosphate metabolic process	58	10.4505	9.79286e-31	MT-ND4L, COX7B, MTCH2, MT-CO1, COX4I1, NDUFA10, ATP5G3, ENO1, COX6A1, KHK, MT-ND1, GPI1, UQCRFS1, COX8B, ENTPD5, PGAM1, SDHD, SDHA, PKM, NDUFS8, UQCRC1, NDUFS2, NDUFS1, UQCRC2, NUPR1, ALDOA, MOCS1, DLD, NDUFB9, PRKAA2, NDUFB5, ATP5A1, UQCR10, ATP5O, COX5A, UQCRH, ATP5L, ATP5B, LDHD, PGK1, CYC1, NDUFV2, PPARGC1A, NDUFV1, NDUFA9, NDUFA6, ATP5PB, CHCHD10, APOC3, COQ9, MLXIPL, GALE, PINK1, UQCRQ, OGD…	514	332	20051	6.81495	5.42133e-27	2.52435e-28	2.38799e-28
	GOTERM_BP_FAT	GO:0009141~nucleoside triphosphate metabolic process	60	10.8108	1.00336e-30	MT-ND4L, COX7B, MTCH2, MT-CO1, COX4I1, NDUFA10, ATP5G3, ENO1, COX6A1, KHK, MT-ND1, GPI1, UQCRFS1, ENTPD4B, COX8B, ENTPD5, PGAM1, SDHD, SDHA, PKM, NDUFS8, UQCRC1, NDUFS2, NDUFS1, UQCRC2, NUPR1, ALDOA, MOCS1, DLD, NDUFB9, PRKAA2, NDUFB5, ATP5A1, UQCR10, ATP5O, COX5A, UQCRH, ATP5L, ATP5B, LDHD, PGK1, CYC1, NDUFV2, PPARGC1A, NDUFV1, NDUFA9, NDUFA6, ATP5PB, CHCHD10, APOC3, COQ9, MLXIPL, GALE, PINK1, U…	514	359	20051	6.51973	5.55457e-27	2.52435e-28	2.38799e-28
	GOTERM_BP_FAT	GO:0009150~purine ribonucleotide metabolic process	69	12.4324	1.53097e-30	MT-ND4L, COX7B, MTCH2, MT-CO1, GDA, PANK1, COX4I1, NDUFA10, RORA, ATP5G3, ENO1, COX6A1, KHK, MT-ND1, GPI1, UQCRFS1, ENTPD4B, COX8B, PDE4D, ENTPD5, PGAM1, SDHD, SDHA, COASY, PKM, NDUFS8, STIM1, UQCRC1, NDUFS2, NDUFS1, UQCRC2, NUPR1, ALDOA, MOCS1, DLD, NDUFB9, PRKAA2, NDUFB5, ATP5A1, UQCR10, ATP5O, COX5A, UQCRH, ATP5L, ATP5B, PPCS, LDHD, PGK1, CYC1, DRD1, NDUFV2, PPARGC1A, NDUFV1, NDUFA9, NDUFA6, A…	514	493	20051	5.45978	8.47543e-27	3.68431e-28	3.48528e-28
	GOTERM_BP_FAT	GO:0009167~purine ribonucleoside monophosphate metabolic process	58	10.4505	2.21365e-30	MT-ND4L, COX7B, MTCH2, MT-CO1, GDA, COX4I1, NDUFA10, ATP5G3, ENO1, COX6A1, KHK, MT-ND1, GPI1, UQCRFS1, COX8B, ENTPD5, PGAM1, SDHD, SDHA, PKM, NDUFS8, UQCRC1, NDUFS2, NDUFS1, UQCRC2, NUPR1, ALDOA, DLD, NDUFB9, PRKAA2, NDUFB5, ATP5A1, UQCR10, ATP5O, COX5A, UQCRH, ATP5L, ATP5B, LDHD, PGK1, CYC1, NDUFV2, PPARGC1A, NDUFV1, NDUFA9, NDUFA6, ATP5PB, CHCHD10, APOC3, COQ9, MLXIPL, GALE, PINK1, UQCRQ, OGDH,…	514	337	20051	6.71384	1.22547e-26	5.10522e-28	4.82944e-28
	GOTERM_BP_FAT	GO:0009126~purine nucleoside monophosphate metabolic process	58	10.4505	2.60109e-30	MT-ND4L, COX7B, MTCH2, MT-CO1, GDA, COX4I1, NDUFA10, ATP5G3, ENO1, COX6A1, KHK, MT-ND1, GPI1, UQCRFS1, COX8B, ENTPD5, PGAM1, SDHD, SDHA, PKM, NDUFS8, UQCRC1, NDUFS2, NDUFS1, UQCRC2, NUPR1, ALDOA, DLD, NDUFB9, PRKAA2, NDUFB5, ATP5A1, UQCR10, ATP5O, COX5A, UQCRH, ATP5L, ATP5B, LDHD, PGK1, CYC1, NDUFV2, PPARGC1A, NDUFV1, NDUFA9, NDUFA6, ATP5PB, CHCHD10, APOC3, COQ9, MLXIPL, GALE, PINK1, UQCRQ, OGDH,…	514	338	20051	6.69398	1.43996e-26	5.53732e-28	5.23819e-28
	GOTERM_BP_FAT	GO:0009144~purine nucleoside triphosphate metabolic process	58	10.4505	2.60109e-30	MT-ND4L, COX7B, MTCH2, MT-CO1, COX4I1, NDUFA10, ATP5G3, ENO1, COX6A1, KHK, MT-ND1, GPI1, UQCRFS1, COX8B, ENTPD5, PGAM1, SDHD, SDHA, PKM, NDUFS8, UQCRC1, NDUFS2, NDUFS1, UQCRC2, NUPR1, ALDOA, MOCS1, DLD, NDUFB9, PRKAA2, NDUFB5, ATP5A1, UQCR10, ATP5O, COX5A, UQCRH, ATP5L, ATP5B, LDHD, PGK1, CYC1, NDUFV2, PPARGC1A, NDUFV1, NDUFA9, NDUFA6, ATP5PB, CHCHD10, APOC3, COQ9, MLXIPL, GALE, PINK1, UQCRQ, OGD…	514	338	20051	6.69398	1.43996e-26	5.53732e-28	5.23819e-28
	GOTERM_BP_FAT	GO:0009123~nucleoside monophosphate metabolic process	60	10.8108	2.94975e-30	MT-ND4L, COX7B, MTCH2, MT-CO1, GDA, COX4I1, NDUFA10, ATP5G3, ENO1, COX6A1, KHK, MT-ND1, GPI1, UQCRFS1, COX8B, ENTPD5, PGAM1, SDHD, SDHA, PKM, NDUFS8, DPYD, UQCRC1, NDUFS2, NDUFS1, UQCRC2, NUPR1, ALDOA, DLD, NDUFB9, PRKAA2, NDUFB5, ATP5A1, UQCR10, ATP5O, COX5A, UQCRH, ATP5L, ATP5B, LDHD, PGK1, CYC1, NDUFV2, PPARGC1A, NDUFV1, NDUFA9, NDUFA6, ATP5PB, CHCHD10, APOC3, COQ9, MLXIPL, GALE, PINK1, UCK1, …	514	366	20051	6.39504	1.63298e-26	6.04699e-28	5.72033e-28
	GOTERM_BP_FAT	GO:0006163~purine nucleotide metabolic process	69	12.4324	1.09039e-29	MT-ND4L, COX7B, MTCH2, MT-CO1, GDA, PANK1, COX4I1, NDUFA10, RORA, ATP5G3, ENO1, COX6A1, KHK, MT-ND1, GPI1, UQCRFS1, ENTPD4B, COX8B, PDE4D, ENTPD5, PGAM1, SDHD, SDHA, COASY, PKM, NDUFS8, STIM1, UQCRC1, NDUFS2, NDUFS1, UQCRC2, NUPR1, ALDOA, MOCS1, DLD, NDUFB9, PRKAA2, NDUFB5, ATP5A1, UQCR10, ATP5O, COX5A, UQCRH, ATP5L, ATP5B, PPCS, LDHD, PGK1, CYC1, DRD1, NDUFV2, PPARGC1A, NDUFV1, NDUFA9, NDUFA6, A…	514	509	20051	5.28816	6.03642e-26	2.15547e-27	2.03904e-27
	GOTERM_BP_FAT	GO:0072521~purine-containing compound metabolic process	70	12.6126	2.40984e-28	MT-ND4L, COX7B, MTCH2, MT-CO1, GDA, PANK1, COX4I1, NDUFA10, RORA, ATP5G3, ENO1, COX6A1, KHK, MT-ND1, GPI1, UQCRFS1, ENTPD4B, COX8B, PDE4D, ENTPD5, PGAM1, SDHD, SDHA, COASY, PKM, NDUFS8, STIM1, DPYD, UQCRC1, NDUFS2, NDUFS1, UQCRC2, NUPR1, ALDOA, MOCS1, DLD, NDUFB9, PRKAA2, NDUFB5, ATP5A1, UQCR10, ATP5O, COX5A, UQCRH, ATP5L, ATP5B, PPCS, LDHD, PGK1, CYC1, DRD1, NDUFV2, PPARGC1A, NDUFV1, NDUFA9, NDU…	514	552	20051	4.94689	1.33409e-24	4.59947e-26	4.351e-26
	GOTERM_BP_FAT	GO:0006631~fatty acid metabolic process	65	11.7117	6.45434e-28	PECR, SLC27A1, ACADVL, DAGLA, ABCD3, ACSM3, ECI1, TECR, ACSM5, AACS, FADS2, ACADL, AKT2, LIPG, SCD1, ACADM, PDK2, FADS1, PDK1, SREBF1, DGAT1, GPX4, ACSL1, ELOVL5, ELOVL3, ELOVL6, ACSL3, HADHB, ACLY, HADHA, CYP2D22, ACOX2, ACOT2, ACOT1, ADTRP, DLD, ACOT4, ACOT3, PTGES, PRKAA2, INSIG1, MGST2, ACAA1B, ABHD5, HSD17B12, HSD17B10, ACACB, ACACA, ACAT2, UCP3, PPARGC1A, ACBD4, PTGES2, APOC3, FMO1, MYO5A, …	514	480	20051	5.28257	3.57312e-24	1.19082e-25	1.1265e-25
	GOTERM_BP_FAT	GO:0006119~oxidative phosphorylation	34	6.12613	5.21799e-27	NDUFB9, MT-ND4L, COX7B, MTCH2, MT-CO1, COX4I1, NDUFA10, UQCR10, COX6A1, COX5A, UQCRH, MT-ND1, UQCRFS1, CYC1, NDUFV2, NDUFV1, COX8B, CHCHD10, APOC3, COQ9, SDHD, SDHA, MLXIPL, PINK1, NDUFS8, UQCRQ, UQCRC1, CYCS, NDUFS2, MT-CYTB, NDUFS1, NUPR1, UQCRC2, DLD	514	106	20051	12.5126	2.88868e-23	9.31663e-25	8.81335e-25
	GOTERM_BP_FAT	GO:0044283~small molecule biosynthetic process	68	12.2523	7.92337e-27	PECR, ACADVL, ABCD3, ACSM3, TECR, ACSM5, MSMO1, GPT, ENO1, TM7SF2, GPI1, FADS2, NSDHL, ACADL, LIPG, LEPR, SCD1, SEPHS2, FADS1, SREBF1, ELOVL5, PGAM1, ELOVL3, ELOVL6, ACSL3, PGD, LSS, MUP3, ACLY, RBP4, PKM, GPD2, DPYD, G6PDX, PGP, MVD, ALDOA, BCAT2, PTGES, IDI1, PRKAA2, PCX, INSIG1, MGST2, HSD17B12, HSD17B10, ACACB, ACACA, CYB5R3, PMVK, PGK1, PPARGC1A, FDFT1, NDUFA9, MDH1, MDH2, PTGES2, APOC3, MYO…	514	551	20051	4.81427	4.38638e-23	1.30454e-24	1.23407e-24
	GOTERM_BP_FAT	GO:0006793~phosphorus metabolic process	184	33.1532	8.07268e-27	KLB, MT-ND4L, SLC27A1, MTCH2, ACSM3, MT-CO1, GDA, PANK1, NDUFA10, GDE1, RORC, DIXDC1, ACSM5, RORA, ENO1, COX6A1, MT-ND1, RASSF2, MPC1, MPC2, AKT2, NAMPT, PIM1, LONP1, LEPR, PRKACA, MAP3K6, TMEM38B, SEPHS2, MAP3K4, PDK2, PDK1, ENTPD4B, PDHX, PCYT2, DGAT1, ACSL1, PRKCE, IGFBP3, ENTPD5, TALDO1, SDHD, ACSL3, SDHA, PGD, PRLR, BSCL2, ACLY, STIM1, GPD2, UQCRC1, PGP, ACOT2, ACOT1, UQCRC2, ADTRP, NUPR1, A…	514	3309	20051	2.16917	4.46904e-23	1.30454e-24	1.23407e-24
	GOTERM_BP_FAT	GO:0035383~thioester metabolic process	33	5.94595	8.24911e-27	ACSM3, DLST, ACSM5, FITM2, PDHB, ACACB, ACACA, PPCS, MPC1, MPC2, PMVK, DLAT, PDK2, PDK1, PDHX, PDHA1, DGAT1, ELOVL5, ACSL1, ELOVL3, ELOVL6, ACSL3, CS, ACLY, NUDT7, FASN, ACOT2, OGDH, ACOT1, MVD, DLD, ACOT4, ACOT3	514	99	20051	13.0032	4.56671e-23	1.30454e-24	1.23407e-24
	GOTERM_BP_FAT	GO:0006637~acyl-CoA metabolic process	33	5.94595	8.24911e-27	ACSM3, DLST, ACSM5, FITM2, PDHB, ACACB, ACACA, PPCS, MPC1, MPC2, PMVK, DLAT, PDK2, PDK1, PDHX, PDHA1, DGAT1, ELOVL5, ACSL1, ELOVL3, ELOVL6, ACSL3, CS, ACLY, NUDT7, FASN, ACOT2, OGDH, ACOT1, MVD, DLD, ACOT4, ACOT3	514	99	20051	13.0032	4.56671e-23	1.30454e-24	1.23407e-24
	GOTERM_BP_FAT	GO:0044255~cellular lipid metabolic process	96	17.2973	5.04862e-26	PECR, SLC27A1, ACADVL, DAGLA, ABCD3, ACSM3, ECI1, TECR, GDE1, PCSK9, ACSM5, AACS, FADS2, PIP4P1, ACADL, AKT2, ACP6, LIPG, B3GALT1, SCD1, ACADM, TMEM38B, PDK2, FADS1, PDK1, SREBF1, PLA2G12A, PCYT2, DGAT1, GPX4, ACSL1, ELOVL5, ELOVL3, ELOVL6, ACSL3, TLCD3B, LSS, HADHB, BSCL2, ACLY, HADHA, RBP4, CYP2D22, ACOX2, ASPG, PGP, ACOT2, ACOT1, MVD, ADTRP, DLD, ACOT4, ACOT3, PTGES, IDI1, VAC14, PRKAA2, PCX, …	514	1109	20051	3.37686	2.79492e-22	7.76226e-24	7.34294e-24
	GOTERM_BP_FAT	GO:0006733~oxidoreduction coenzyme metabolic process	41	7.38739	8.7934e-26	MTCH2, PRKAA2, DLST, PDHB, ENO1, KHK, GPI1, HSD11B1, MPC1, MPC2, NAMPT, IDH3B, PGK1, DLAT, PGLS, PPARGC1A, CBR2, NDUFA9, PDHX, PDHA1, MDH1, MDH2, IDH3G, ENTPD5, PGAM1, TALDO1, FMO1, COQ9, PGD, MLXIPL, GALE, PKM, GPD2, G6PDX, OGDH, COQ8A, NUPR1, ALDOA, TKT, DLD, PFKM	514	185	20051	8.6454	4.86803e-22	1.31545e-23	1.24439e-23
	GOTERM_BP_FAT	GO:0042773~ATP synthesis coupled electron transport	29	5.22523	1.54451e-24	NDUFB9, MT-ND4L, MTCH2, MT-CO1, COX4I1, NDUFA10, UQCR10, COX6A1, COX5A, UQCRH, MT-ND1, UQCRFS1, CYC1, NDUFV2, NDUFV1, COX8B, COQ9, SDHD, SDHA, PINK1, NDUFS8, UQCRQ, UQCRC1, CYCS, NDUFS2, MT-CYTB, NDUFS1, UQCRC2, DLD	514	81	20051	13.9664	8.5504e-21	2.2497e-22	2.12817e-22
	GOTERM_BP_FAT	GO:0022904~respiratory electron transport chain	32	5.76577	1.62244e-24	NDUFB9, MT-ND4L, MTCH2, MT-CO1, COX4I1, NDUFA10, UQCR10, COX6A1, COX5A, UQCRH, MT-ND1, UQCRFS1, CYC1, NDUFV2, PPARGC1A, NDUFV1, SLC25A22, COX8B, COQ9, SDHD, SDHA, SOD2, PINK1, NDUFS8, UQCRQ, UQCRC1, CYCS, NDUFS2, MT-CYTB, NDUFS1, UQCRC2, DLD	514	106	20051	11.7765	8.98182e-21	2.30261e-22	2.17823e-22
	GOTERM_BP_FAT	GO:0019362~pyridine nucleotide metabolic process	38	6.84685	3.11767e-24	MTCH2, PRKAA2, DLST, PDHB, ENO1, KHK, GPI1, HSD11B1, MPC1, MPC2, NAMPT, IDH3B, PGK1, DLAT, PGLS, PPARGC1A, CBR2, PDHX, PDHA1, MDH1, MDH2, IDH3G, ENTPD5, PGAM1, TALDO1, FMO1, PGD, MLXIPL, GALE, PKM, GPD2, G6PDX, OGDH, NUPR1, ALDOA, TKT, DLD, PFKM	514	168	20051	8.82363	1.72594e-20	4.20886e-22	3.98149e-22
	GOTERM_BP_FAT	GO:0046496~nicotinamide nucleotide metabolic process	38	6.84685	3.11767e-24	MTCH2, PRKAA2, DLST, PDHB, ENO1, KHK, GPI1, HSD11B1, MPC1, MPC2, NAMPT, IDH3B, PGK1, DLAT, PGLS, PPARGC1A, CBR2, PDHX, PDHA1, MDH1, MDH2, IDH3G, ENTPD5, PGAM1, TALDO1, FMO1, PGD, MLXIPL, GALE, PKM, GPD2, G6PDX, OGDH, NUPR1, ALDOA, TKT, DLD, PFKM	514	168	20051	8.82363	1.72594e-20	4.20886e-22	3.98149e-22
	GOTERM_BP_FAT	GO:0009060~aerobic respiration	31	5.58559	1.43433e-23	NDUFB9, MT-ND4L, MT-CO1, NDUFB5, NDUFA10, DLST, MTFR1L, PDHB, UQCR10, UQCRH, MT-ND1, IDH3B, DLAT, NDUFV2, NDUFV1, NDUFA9, PDHA1, NDUFA6, MDH1, MDH2, IDH3G, SDHD, SDHA, MUP3, CS, NDUFS8, OGDH, NDUFS2, ACO1, NDUFS1, ACO2	514	104	20051	11.6279	7.94047e-20	1.89025e-21	1.78814e-21
	GOTERM_BP_FAT	GO:0042775~mitochondrial ATP synthesis coupled electron transport	28	5.04505	1.48974e-23	NDUFB9, MTCH2, MT-CO1, COX4I1, NDUFA10, UQCR10, COX6A1, COX5A, UQCRH, MT-ND1, UQCRFS1, CYC1, NDUFV2, NDUFV1, COX8B, COQ9, SDHD, SDHA, PINK1, NDUFS8, UQCRQ, UQCRC1, CYCS, NDUFS2, MT-CYTB, NDUFS1, UQCRC2, DLD	514	79	20051	13.8262	8.24723e-20	1.91761e-21	1.81402e-21
	GOTERM_BP_FAT	GO:0072524~pyridine-containing compound metabolic process	38	6.84685	2.18743e-23	MTCH2, PRKAA2, DLST, PDHB, ENO1, KHK, GPI1, HSD11B1, MPC1, MPC2, NAMPT, IDH3B, PGK1, DLAT, PGLS, PPARGC1A, CBR2, PDHX, PDHA1, MDH1, MDH2, IDH3G, ENTPD5, PGAM1, TALDO1, FMO1, PGD, MLXIPL, GALE, PKM, GPD2, G6PDX, OGDH, NUPR1, ALDOA, TKT, DLD, PFKM	514	177	20051	8.37497	1.21096e-19	2.75168e-21	2.60304e-21
	GOTERM_BP_FAT	GO:0044712~single-organism catabolic process	85	15.3153	1.09565e-22	ACADVL, MTCH2, DAGLA, ABCD3, GDA, ECI1, GPT, PYGL, ENO1, PEPD, KHK, GPI1, ALDH2, ACADL, AKT2, MMP28, LIPG, ACADM, SLC25A44, PGM1, ACAD8, BCKDHA, ENTPD4B, PLA2G12A, VPS13C, PDE4D, PRKCE, ENTPD5, PGAM1, PGD, MMP8, HADHB, BSCL2, HADHA, PKM, ACOX2, GPD2, DPYD, ASPG, ACOT2, VDAC1, ADTRP, NUPR1, ALDOA, DLD, ACOT4, BCAT2, PRKAA2, DERL1, DLST, MGST2, ACAA1B, ABHD5, HSD17B10, ACACB, FBXO44, DDO, ACAT2, HS…	514	991	20051	3.34594	6.06549e-19	1.34764e-20	1.27484e-20
	GOTERM_BP_FAT	GO:0022900~electron transport chain	32	5.76577	1.7338e-22	NDUFB9, MT-ND4L, MTCH2, MT-CO1, COX4I1, NDUFA10, UQCR10, COX6A1, COX5A, UQCRH, MT-ND1, UQCRFS1, CYC1, NDUFV2, PPARGC1A, NDUFV1, SLC25A22, COX8B, COQ9, SDHD, SDHA, SOD2, PINK1, NDUFS8, UQCRQ, UQCRC1, CYCS, NDUFS2, MT-CYTB, NDUFS1, UQCRC2, DLD	514	122	20051	10.2321	9.59829e-19	2.08621e-20	1.97351e-20
	GOTERM_BP_FAT	GO:1901135~carbohydrate derivative metabolic process	91	16.3964	3.0151e-21	MT-ND4L, COX7B, MTCH2, MT-CO1, GDA, PANK1, COX4I1, NDUFA10, RORA, PYGL, SLC2A4, ATP5G3, ENO1, COX6A1, KHK, MT-ND1, GPI1, ACP6, B3GALT1, PIM1, UQCRFS1, PGLS, ENTPD4B, COX8B, PDE4D, ENTPD5, PGAM1, TALDO1, SDHD, SDHA, PGD, COASY, PKM, NDUFS8, STIM1, GPD2, DPYD, G6PDX, UQCRC1, NDUFS2, CHIL3, NDUFS1, UQCRC2, NUPR1, ALDOA, TKT, MOCS1, DLD, CHIL6, NDUFB9, PRKAA2, NDUFB5, ATP5A1, UQCR10, ATP5O, ART5, COX…	514	1177	20051	3.01605	1.66916e-17	3.55076e-19	3.35894e-19
	GOTERM_BP_FAT	GO:0006796~phosphate-containing compound metabolic process	168	30.2703	4.71348e-21	KLB, MT-ND4L, SLC27A1, MTCH2, MT-CO1, GDA, PANK1, NDUFA10, GDE1, RORC, DIXDC1, RORA, ENO1, COX6A1, MT-ND1, RASSF2, MPC1, MPC2, AKT2, NAMPT, PIM1, LONP1, LEPR, PRKACA, MAP3K6, TMEM38B, SEPHS2, MAP3K4, PDK2, PDK1, ENTPD4B, PDHX, PCYT2, ACSL1, PRKCE, IGFBP3, ENTPD5, TALDO1, SDHD, ACSL3, SDHA, PGD, PRLR, BSCL2, STIM1, GPD2, UQCRC1, PGP, UQCRC2, ADTRP, NUPR1, IDI1, LPAR3, ABHD5, NDRG2, ATP5O, UQCRH, A…	514	3224	20051	2.03276	2.60938e-17	5.43523e-19	5.14162e-19
	GOTERM_BP_FAT	GO:0008610~lipid biosynthetic process	66	11.8919	7.72375e-21	PECR, SLC27A1, ACADVL, DHRS11, ABCD3, ACSM3, TECR, ACSM5, MSMO1, TM7SF2, FADS2, NSDHL, ACADL, LIPG, B3GALT1, SCD1, TMEM38B, FADS1, SREBF1, PCYT2, DGAT1, ACSL1, ELOVL5, ELOVL3, ELOVL6, ACSL3, TLCD3B, LSS, MUP3, BSCL2, ACLY, G6PDX, MVD, PTGES, IDI1, VAC14, PRKAA2, PCX, INSIG1, MGST2, FITM2, ABHD5, HSD17B12, HSD17B10, AGPAT2, ACACB, ACACA, HSD11B1, CYB5R3, ORMDL3, PMVK, PPARGC1A, FDFT1, PTGES2, APOC…	514	665	20051	3.87164	4.27587e-17	8.72468e-19	8.25338e-19
	GOTERM_BP_FAT	GO:0044282~small molecule catabolic process	46	8.28829	1.02162e-18	ACADVL, ABCD3, ECI1, DLST, ACAA1B, GPT, ENO1, HSD17B10, ACACB, DDO, ACAT2, KHK, GPI1, ALDH3B2, ALDH2, ACADL, AKT2, LDHD, PGK1, ACADM, PRODH, SLC25A44, ACAD8, BCKDHA, ENTPD4B, PGD, BCKDK, ALDH4A1, HADHB, HADHA, GALE, NUDT7, PKM, ACOX2, GPD2, ACOT2, CYP1A1, ECHDC1, ADTRP, ALDOA, DLD, PFKM, CRAT, ACOT4, BCAT2, TUBA8	514	361	20051	4.97077	5.65568e-15	1.13093e-16	1.06984e-16
	GOTERM_BP_FAT	GO:0005975~carbohydrate metabolic process	61	10.991	1.88546e-18	KLB, MTCH2, GBE1, RORC, RORA, GPT, PYGL, ENO1, KHK, GPI1, GYS1, GYG, AKT2, B3GALT1, LEPR, DLAT, ACADM, PGLS, PDK2, PGM1, PDK1, CBR2, IGFBP3, PRKCE, ENTPD5, PGAM1, TALDO1, PGD, MUP3, RBP4, PKM, GPD2, G6PDX, PGP, CHIL3, NUPR1, ALDOA, CHIL6, PRKAA2, PCX, PDHB, ACACB, HSD11B1, UGP2, PGK1, APOD, ST3GAL6, PPARGC1A, PDHA1, PMM1, MDH1, MDH2, AGL, BCKDK, CS, MLXIPL, GALE, PPP1R1A, OGDH, PFKM, MYORG	514	639	20051	3.72393	1.04379e-14	2.04628e-16	1.93574e-16
	GOTERM_BP_FAT	GO:0006839~mitochondrial transport	39	7.02703	2.48112e-18	SLC25A1, NDUFB9, MT-ND4L, MTCH2, NDUFB5, NDUFA10, ATP5A1, DUSP18, ATP5O, ATP5L, MT-ND1, ATP5B, SAMM50, GRPEL1, MPC1, UCP3, MPC2, SLC25A20, NDUFV2, NDUFV1, SLC25A22, TMEM14C, NDUFA9, NDUFA6, ATP5PB, CHCHD10, TIMM23, SDHD, SDHA, LETM1, AFG3L2, PINK1, NDUFS8, TST, NDUFS2, SFXN1, SLC25A10, VDAC1, NDUFS1	514	260	20051	5.85146	1.37355e-14	2.64097e-16	2.4983e-16
	GOTERM_BP_FAT	GO:0051188~cofactor biosynthetic process	32	5.76577	4.62883e-18	ISCA1, PANK1, PDHB, ACACB, ACACA, PPCS, MPC1, MPC2, NAMPT, DLAT, PDK2, TMEM14C, PDK1, HSPA9, NDUFA9, PDHX, PDHA1, GLRX3, ELOVL5, ACSL1, GLRX5, ELOVL3, ELOVL6, COQ9, COASY, ACLY, SLC25A39, SLC6A9, G6PDX, COQ8A, DLD, MOCS1	514	169	20051	7.38646	2.56252e-14	4.83407e-16	4.57294e-16
	GOTERM_BP_FAT	GO:0035384~thioester biosynthetic process	17	3.06306	2.03769e-17	PDHX, PDHA1, ELOVL5, ACSL1, ELOVL3, ELOVL6, PDHB, ACACB, ACACA, ACLY, PPCS, MPC1, MPC2, DLAT, DLD, PDK2, PDK1	514	33	20051	20.0959	1.12807e-13	2.05066e-15	1.93988e-15
	GOTERM_BP_FAT	GO:0071616~acyl-CoA biosynthetic process	17	3.06306	2.03769e-17	PDHX, PDHA1, ELOVL5, ACSL1, ELOVL3, ELOVL6, PDHB, ACACB, ACACA, ACLY, PPCS, MPC1, MPC2, DLAT, DLD, PDK2, PDK1	514	33	20051	20.0959	1.12807e-13	2.05066e-15	1.93988e-15
	GOTERM_BP_FAT	GO:0006090~pyruvate metabolic process	26	4.68468	4.96378e-17	MTCH2, PRKAA2, PCX, PDHB, ENO1, KHK, GPI1, MPC1, MPC2, ME1, PGK1, DLAT, ME2, PPARGC1A, PDHX, PDHA1, ENTPD5, PGAM1, MLXIPL, GALE, PKM, OGDH, NUPR1, ALDOA, DLD, PFKM	514	111	20051	9.13741	2.74795e-13	4.90617e-15	4.64114e-15
	GOTERM_BP_FAT	GO:0006084~acetyl-CoA metabolic process	17	3.06306	6.74251e-17	PDHX, PDHA1, DLST, PDHB, ACACB, ACACA, CS, ACLY, NUDT7, PPCS, MPC1, FASN, MPC2, PMVK, MVD, DLAT, DLD	514	35	20051	18.9476	6.14619e-13	6.54733e-15	6.19364e-15
	GOTERM_BP_FAT	GO:0006790~sulfur compound metabolic process	45	8.10811	1.20203e-16	ISCA1, ACSM3, DLST, MGST2, ACSM5, FITM2, PDHB, ACACB, ACACA, SULT1A1, PPCS, MPC1, MPC2, PMVK, DLAT, PDK2, PDK1, HSPA9, PDHX, PDHA1, GLRX3, DGAT1, GPX4, ELOVL5, ACSL1, PTGES2, GLRX5, ELOVL3, ELOVL6, ACSL3, SOD2, CS, ACLY, NUDT7, TST, FASN, G6PDX, ACOT2, OGDH, ACOT1, MVD, GCLM, DLD, ACOT4, ACOT3	514	391	20051	4.48961	6.14619e-13	1.14711e-14	1.08514e-14
	GOTERM_BP_FAT	GO:0006754~ATP biosynthetic process	25	4.5045	1.46869e-16	NDUFB9, MT-ND4L, NDUFB5, NDUFA10, ATP5A1, ATP5G3, ENO1, ATP5O, ATP5L, MT-ND1, ATP5B, LDHD, NDUFV2, PPARGC1A, NDUFV1, NDUFA9, NDUFA6, ATP5PB, SDHD, SDHA, NDUFS8, PKM, NDUFS2, NDUFS1, ALDOA	514	105	20051	9.28803	6.14619e-13	1.37783e-14	1.3034e-14
	GOTERM_BP_FAT	GO:0006633~fatty acid biosynthetic process	30	5.40541	2.17178e-16	PECR, ACADVL, ABCD3, PRKAA2, ACSM3, INSIG1, TECR, MGST2, ACSM5, HSD17B12, ACACB, ACACA, FADS2, ACADL, LIPG, SCD1, FADS1, SREBF1, ELOVL5, PTGES2, ELOVL3, APOC3, MYO5A, ELOVL6, ACSL3, MCAT, ACLY, MLXIPL, FASN, PTGES	514	166	20051	7.04995	1.22924e-12	2.00347e-14	1.89524e-14
	GOTERM_BP_FAT	GO:0090407~organophosphate biosynthetic process	53	9.54955	3.54074e-16	MT-ND4L, SLC27A1, PANK1, NDUFA10, PYGL, ATP5G3, ENO1, MT-ND1, NAMPT, TMEM38B, PCYT2, ACSL3, SDHD, SDHA, COASY, BSCL2, PKM, NDUFS8, STIM1, G6PDX, NDUFS2, MVD, NDUFS1, ALDOA, TKT, MOCS1, NDUFB9, IDI1, VAC14, PCX, NDUFB5, ATP5A1, FITM2, ABHD5, ATP5O, AGPAT2, ATP5L, ATP5B, PPCS, ORMDL3, LDHD, PMVK, DRD1, NDUFV2, PPARGC1A, NDUFV1, NDUFA9, NDUFA6, ATP5PB, ADCY10, UCK1, LPCAT3, CHPT1	514	547	20051	3.77974	1.84386e-12	3.21278e-14	3.03923e-14
	GOTERM_BP_FAT	GO:0009108~coenzyme biosynthetic process	25	4.5045	4.55898e-16	PANK1, PDHB, ACACB, ACACA, PPCS, MPC1, MPC2, NAMPT, DLAT, PDK2, PDK1, NDUFA9, PDHX, PDHA1, ELOVL5, ACSL1, ELOVL3, ELOVL6, COQ9, COASY, ACLY, G6PDX, COQ8A, DLD, MOCS1	514	110	20051	8.86585	2.45848e-12	4.06999e-14	3.85013e-14
	GOTERM_BP_FAT	GO:1902600~hydrogen ion transmembrane transport	26	4.68468	7.63826e-16	NDUFB9, MT-ND4L, MT-CO1, NDUFB5, NDUFA10, ATP5A1, ATP1A3, ATP5G3, ATP5O, ATP5L, MT-ND1, ATP5B, NDUFV2, NDUFV1, NDUFA9, ATP6V1G1, SLC36A2, NDUFA6, ATP5PB, SDHD, SDHA, NDUFS8, UQCRQ, NDUFS2, MT-CYTB, NDUFS1	514	123	20051	8.24596	4.30234e-12	6.71075e-14	6.34824e-14
	GOTERM_BP_FAT	GO:0009201~ribonucleoside triphosphate biosynthetic process	26	4.68468	9.08652e-16	NDUFB9, MT-ND4L, NDUFB5, NDUFA10, ATP5A1, ATP5G3, ENO1, ATP5O, ATP5L, MT-ND1, ATP5B, LDHD, NDUFV2, PPARGC1A, NDUFV1, NDUFA9, NDUFA6, ATP5PB, SDHD, SDHA, NDUFS8, UCK1, PKM, NDUFS2, NDUFS1, ALDOA	514	124	20051	8.17946	4.91696e-12	7.85842e-14	7.43391e-14
	GOTERM_BP_FAT	GO:0072330~monocarboxylic acid biosynthetic process	33	5.94595	1.83386e-15	PECR, ACADVL, ABCD3, PRKAA2, ACSM3, INSIG1, TECR, MGST2, ACSM5, HSD17B12, HSD17B10, ACACB, ACACA, FADS2, ACADL, LIPG, SCD1, FADS1, SREBF1, ELOVL5, PTGES2, ELOVL3, APOC3, MYO5A, ELOVL6, ACSL3, MCAT, ACLY, MLXIPL, PKM, FASN, CYP1A1, PTGES	514	221	20051	5.82498	1.04485e-11	1.5616e-13	1.47724e-13
	GOTERM_BP_FAT	GO:0009206~purine ribonucleoside triphosphate biosynthetic process	25	4.5045	2.67825e-15	NDUFB9, MT-ND4L, NDUFB5, NDUFA10, ATP5A1, ATP5G3, ENO1, ATP5O, ATP5L, MT-ND1, ATP5B, LDHD, NDUFV2, PPARGC1A, NDUFV1, NDUFA9, NDUFA6, ATP5PB, SDHD, SDHA, NDUFS8, PKM, NDUFS2, NDUFS1, ALDOA	514	118	20051	8.26477	1.47509e-11	2.24608e-13	2.12475e-13
	GOTERM_BP_FAT	GO:0009145~purine nucleoside triphosphate biosynthetic process	25	4.5045	3.33431e-15	NDUFB9, MT-ND4L, NDUFB5, NDUFA10, ATP5A1, ATP5G3, ENO1, ATP5O, ATP5L, MT-ND1, ATP5B, LDHD, NDUFV2, PPARGC1A, NDUFV1, NDUFA9, NDUFA6, ATP5PB, SDHD, SDHA, NDUFS8, PKM, NDUFS2, NDUFS1, ALDOA	514	119	20051	8.19532	1.84386e-11	2.75454e-13	2.60574e-13
	GOTERM_BP_FAT	GO:0046390~ribose phosphate biosynthetic process	35	6.30631	3.82377e-15	NDUFB9, MT-ND4L, PANK1, NDUFB5, NDUFA10, ATP5A1, ATP5G3, PYGL, ENO1, ATP5O, ATP5L, MT-ND1, ATP5B, PPCS, LDHD, DRD1, NDUFV2, PPARGC1A, NDUFV1, NDUFA9, NDUFA6, ATP5PB, SDHD, SDHA, COASY, ADCY10, NDUFS8, UCK1, PKM, STIM1, G6PDX, NDUFS2, NDUFS1, ALDOA, TKT	514	257	20051	5.31261	2.08971e-11	3.11244e-13	2.94431e-13
	GOTERM_BP_FAT	GO:0015986~ATP synthesis coupled proton transport	20	3.6036	4.22204e-15	NDUFA9, NDUFB9, MT-ND4L, NDUFA6, ATP5PB, NDUFB5, NDUFA10, ATP5A1, ATP5G3, SDHD, SDHA, ATP5O, ATP5L, MT-ND1, ATP5B, NDUFS8, NDUFS2, NDUFS1, NDUFV2, NDUFV1	514	68	20051	11.4734	2.33555e-11	3.33843e-13	3.15809e-13
	GOTERM_BP_FAT	GO:0015985~energy coupled proton transport, down electrochemical gradient	20	3.6036	4.22204e-15	NDUFA9, NDUFB9, MT-ND4L, NDUFA6, ATP5PB, NDUFB5, NDUFA10, ATP5A1, ATP5G3, SDHD, SDHA, ATP5O, ATP5L, MT-ND1, ATP5B, NDUFS8, NDUFS2, NDUFS1, NDUFV2, NDUFV1	514	68	20051	11.4734	2.33555e-11	3.33843e-13	3.15809e-13
	GOTERM_BP_FAT	GO:0009142~nucleoside triphosphate biosynthetic process	26	4.68468	8.50571e-15	NDUFB9, MT-ND4L, NDUFB5, NDUFA10, ATP5A1, ATP5G3, ENO1, ATP5O, ATP5L, MT-ND1, ATP5B, LDHD, NDUFV2, PPARGC1A, NDUFV1, NDUFA9, NDUFA6, ATP5PB, SDHD, SDHA, NDUFS8, UCK1, PKM, NDUFS2, NDUFS1, ALDOA	514	136	20051	7.45774	4.73257e-11	6.63086e-13	6.27266e-13
	GOTERM_BP_FAT	GO:1990542~mitochondrial transmembrane transport	26	4.68468	1.01998e-14	NDUFB9, MT-ND4L, NDUFB5, NDUFA10, ATP5A1, ATP5O, ATP5L, MT-ND1, ATP5B, SAMM50, GRPEL1, UCP3, NDUFV2, NDUFV1, NDUFA9, NDUFA6, ATP5PB, TIMM23, SDHD, SDHA, LETM1, AFG3L2, NDUFS8, NDUFS2, SFXN1, NDUFS1	514	137	20051	7.40331	5.6545e-11	7.84107e-13	7.4175e-13
	GOTERM_BP_FAT	GO:0015992~proton transport	27	4.86486	1.07306e-14	NDUFB9, MT-ND4L, MT-CO1, NDUFB5, NDUFA10, ATP5A1, ATP1A3, ATP5G3, ATP5O, ATP5L, MT-ND1, ATP5B, NDUFV2, NDUFV1, NDUFA9, ATP6V1G1, SLC36A2, NDUFA6, ATP5PB, MYO5A, SDHD, SDHA, NDUFS8, UQCRQ, NDUFS2, MT-CYTB, NDUFS1	514	150	20051	7.02175	5.96181e-11	8.02622e-13	7.59264e-13
	GOTERM_BP_FAT	GO:0006818~hydrogen transport	27	4.86486	1.07306e-14	NDUFB9, MT-ND4L, MT-CO1, NDUFB5, NDUFA10, ATP5A1, ATP1A3, ATP5G3, ATP5O, ATP5L, MT-ND1, ATP5B, NDUFV2, NDUFV1, NDUFA9, ATP6V1G1, SLC36A2, NDUFA6, ATP5PB, MYO5A, SDHD, SDHA, NDUFS8, UQCRQ, NDUFS2, MT-CYTB, NDUFS1	514	150	20051	7.02175	5.96181e-11	8.02622e-13	7.59264e-13
	GOTERM_BP_FAT	GO:0042776~mitochondrial ATP synthesis coupled proton transport	19	3.42342	1.99307e-14	NDUFA9, NDUFB9, MT-ND4L, NDUFA6, ATP5PB, NDUFB5, NDUFA10, ATP5A1, SDHD, SDHA, ATP5O, ATP5L, MT-ND1, ATP5B, NDUFS8, NDUFS2, NDUFS1, NDUFV2, NDUFV1	514	64	20051	11.581	1.10632e-10	1.47088e-12	1.39143e-12
	GOTERM_BP_FAT	GO:0009168~purine ribonucleoside monophosphate biosynthetic process	25	4.5045	3.19512e-14	NDUFB9, MT-ND4L, NDUFB5, NDUFA10, ATP5A1, ATP5G3, ENO1, ATP5O, ATP5L, MT-ND1, ATP5B, LDHD, NDUFV2, PPARGC1A, NDUFV1, NDUFA9, NDUFA6, ATP5PB, SDHD, SDHA, NDUFS8, PKM, NDUFS2, NDUFS1, ALDOA	514	131	20051	7.4446	1.7701e-10	2.29675e-12	2.17268e-12
	GOTERM_BP_FAT	GO:0009127~purine nucleoside monophosphate biosynthetic process	25	4.5045	3.19512e-14	NDUFB9, MT-ND4L, NDUFB5, NDUFA10, ATP5A1, ATP5G3, ENO1, ATP5O, ATP5L, MT-ND1, ATP5B, LDHD, NDUFV2, PPARGC1A, NDUFV1, NDUFA9, NDUFA6, ATP5PB, SDHD, SDHA, NDUFS8, PKM, NDUFS2, NDUFS1, ALDOA	514	131	20051	7.4446	1.7701e-10	2.29675e-12	2.17268e-12
	GOTERM_BP_FAT	GO:0046395~carboxylic acid catabolic process	33	5.94595	3.66108e-14	ACADVL, ABCD3, ECI1, DLST, ACAA1B, GPT, HSD17B10, ACACB, DDO, ACAT2, ACADL, AKT2, LDHD, ACADM, PRODH, SLC25A44, ACAD8, BCKDHA, PGD, BCKDK, ALDH4A1, HADHB, HADHA, NUDT7, ACOX2, ACOT2, ECHDC1, ADTRP, DLD, CRAT, ACOT4, BCAT2, TUBA8	514	245	20051	5.25437	2.02824e-10	2.56507e-12	2.42651e-12
	GOTERM_BP_FAT	GO:0016054~organic acid catabolic process	33	5.94595	3.66108e-14	ACADVL, ABCD3, ECI1, DLST, ACAA1B, GPT, HSD17B10, ACACB, DDO, ACAT2, ACADL, AKT2, LDHD, ACADM, PRODH, SLC25A44, ACAD8, BCKDHA, PGD, BCKDK, ALDH4A1, HADHB, HADHA, NUDT7, ACOX2, ACOT2, ECHDC1, ADTRP, DLD, CRAT, ACOT4, BCAT2, TUBA8	514	245	20051	5.25437	2.02824e-10	2.56507e-12	2.42651e-12
	GOTERM_BP_FAT	GO:0006101~citrate metabolic process	15	2.7027	3.76786e-14	PDHA1, MDH1, MDH2, IDH3G, DLST, PDHB, SDHD, SDHA, CS, ACLY, OGDH, IDH3B, ACO1, ACO2, DLAT	514	34	20051	17.2102	2.08356e-10	2.60689e-12	2.46607e-12
	GOTERM_BP_FAT	GO:0044723~single-organism carbohydrate metabolic process	48	8.64865	3.92059e-14	MTCH2, PRKAA2, PCX, GBE1, GPT, PYGL, PDHB, ENO1, KHK, GPI1, GYS1, UGP2, GYG, AKT2, B3GALT1, LEPR, PGK1, ST3GAL6, APOD, DLAT, ACADM, PPARGC1A, PGM1, PDK2, PDK1, CBR2, PDHA1, PMM1, MDH1, MDH2, PRKCE, ENTPD5, PGAM1, AGL, PGD, MUP3, MLXIPL, GALE, RBP4, PKM, PPP1R1A, GPD2, G6PDX, PGP, OGDH, NUPR1, ALDOA, PFKM	514	514	20051	3.64293	2.16961e-10	2.67907e-12	2.53434e-12
	GOTERM_BP_FAT	GO:0009156~ribonucleoside monophosphate biosynthetic process	26	4.68468	3.98691e-14	NDUFB9, MT-ND4L, NDUFB5, NDUFA10, ATP5A1, ATP5G3, ENO1, ATP5O, ATP5L, MT-ND1, ATP5B, LDHD, NDUFV2, PPARGC1A, NDUFV1, NDUFA9, NDUFA6, ATP5PB, SDHD, SDHA, NDUFS8, UCK1, PKM, NDUFS2, NDUFS1, ALDOA	514	145	20051	6.99485	2.20648e-10	2.69117e-12	2.54579e-12
	GOTERM_BP_FAT	GO:0016053~organic acid biosynthetic process	36	6.48649	1.16663e-13	PECR, ACADVL, ABCD3, PRKAA2, ACSM3, INSIG1, TECR, MGST2, ACSM5, HSD17B12, HSD17B10, ACACB, ACACA, FADS2, ACADL, LIPG, SCD1, SEPHS2, FADS1, SREBF1, ELOVL5, PTGES2, ELOVL3, APOC3, MYO5A, ELOVL6, ACSL3, MCAT, ACLY, MLXIPL, PKM, FASN, DPYD, CYP1A1, BCAT2, PTGES	514	305	20051	4.60443	6.45965e-10	7.68726e-12	7.27199e-12
	GOTERM_BP_FAT	GO:0046394~carboxylic acid biosynthetic process	36	6.48649	1.16663e-13	PECR, ACADVL, ABCD3, PRKAA2, ACSM3, INSIG1, TECR, MGST2, ACSM5, HSD17B12, HSD17B10, ACACB, ACACA, FADS2, ACADL, LIPG, SCD1, SEPHS2, FADS1, SREBF1, ELOVL5, PTGES2, ELOVL3, APOC3, MYO5A, ELOVL6, ACSL3, MCAT, ACLY, MLXIPL, PKM, FASN, DPYD, CYP1A1, BCAT2, PTGES	514	305	20051	4.60443	6.45965e-10	7.68726e-12	7.27199e-12
	GOTERM_BP_FAT	GO:0009124~nucleoside monophosphate biosynthetic process	26	4.68468	1.42766e-13	NDUFB9, MT-ND4L, NDUFB5, NDUFA10, ATP5A1, ATP5G3, ENO1, ATP5O, ATP5L, MT-ND1, ATP5B, LDHD, NDUFV2, PPARGC1A, NDUFV1, NDUFA9, NDUFA6, ATP5PB, SDHD, SDHA, NDUFS8, UCK1, PKM, NDUFS2, NDUFS1, ALDOA	514	153	20051	6.6291	7.90401e-10	9.2966e-12	8.7944e-12
	GOTERM_BP_FAT	GO:0009260~ribonucleotide biosynthetic process	32	5.76577	3.44083e-13	NDUFB9, MT-ND4L, PANK1, NDUFB5, NDUFA10, ATP5A1, ATP5G3, ENO1, ATP5O, ATP5L, MT-ND1, ATP5B, PPCS, LDHD, DRD1, NDUFV2, PPARGC1A, NDUFV1, NDUFA9, NDUFA6, ATP5PB, SDHD, SDHA, COASY, ADCY10, NDUFS8, UCK1, PKM, STIM1, NDUFS2, NDUFS1, ALDOA	514	249	20051	5.0133	1.90471e-09	2.21453e-11	2.0949e-11
	GOTERM_BP_FAT	GO:0072350~tricarboxylic acid metabolic process	15	2.7027	3.62598e-13	PDHA1, MDH1, MDH2, IDH3G, DLST, PDHB, SDHD, SDHA, CS, ACLY, OGDH, IDH3B, ACO1, ACO2, DLAT	514	39	20051	15.0037	2.00735e-09	2.30687e-11	2.18225e-11
	GOTERM_BP_FAT	GO:0009152~purine ribonucleotide biosynthetic process	31	5.58559	3.846e-13	NDUFB9, MT-ND4L, PANK1, NDUFB5, NDUFA10, ATP5A1, ATP5G3, ENO1, ATP5O, ATP5L, MT-ND1, ATP5B, PPCS, LDHD, DRD1, NDUFV2, PPARGC1A, NDUFV1, NDUFA9, NDUFA6, ATP5PB, SDHD, SDHA, COASY, ADCY10, NDUFS8, PKM, STIM1, NDUFS2, NDUFS1, ALDOA	514	234	20051	5.16796	2.12904e-09	2.41904e-11	2.28837e-11
	GOTERM_BP_FAT	GO:0006099~tricarboxylic acid cycle	14	2.52252	6.21834e-13	PDHA1, MDH1, MDH2, IDH3G, DLST, PDHB, SDHD, SDHA, CS, OGDH, IDH3B, ACO1, ACO2, DLAT	514	33	20051	16.5496	3.44248e-09	3.86725e-11	3.65834e-11
	GOTERM_BP_FAT	GO:0006164~purine nucleotide biosynthetic process	31	5.58559	1.15681e-12	NDUFB9, MT-ND4L, PANK1, NDUFB5, NDUFA10, ATP5A1, ATP5G3, ENO1, ATP5O, ATP5L, MT-ND1, ATP5B, PPCS, LDHD, DRD1, NDUFV2, PPARGC1A, NDUFV1, NDUFA9, NDUFA6, ATP5PB, SDHD, SDHA, COASY, ADCY10, NDUFS8, PKM, STIM1, NDUFS2, NDUFS1, ALDOA	514	244	20051	4.95615	6.40433e-09	7.11441e-11	6.73009e-11
	GOTERM_BP_FAT	GO:0009165~nucleotide biosynthetic process	34	6.12613	1.22123e-12	NDUFB9, MT-ND4L, PANK1, NDUFB5, NDUFA10, ATP5A1, ATP5G3, ENO1, ATP5O, ATP5L, MT-ND1, ATP5B, PPCS, LDHD, NAMPT, DRD1, NDUFV2, PPARGC1A, NDUFV1, NDUFA9, NDUFA6, ATP5PB, SDHD, SDHA, COASY, ADCY10, NDUFS8, UCK1, PKM, STIM1, G6PDX, NDUFS2, NDUFS1, ALDOA	514	295	20051	4.49604	6.76081e-09	7.42803e-11	7.02676e-11
	GOTERM_BP_FAT	GO:0007005~mitochondrion organization	48	8.64865	1.91856e-12	COX19, NDUFB9, MTCH2, MTFP1, NDUFB5, NDUFA10, DUSP18, MTFR1L, TRAK1, HSD17B10, TBRG4, MT-ND1, PRDX3, APOO, CHCHD3, SAMM50, GRPEL1, LONP1, UQCRFS1, PPARGC1A, RAB5IF, NDUFA9, SREBF1, MIGA2, NDUFA6, VPS13C, HUWE1, DDHD2, CHCHD10, IMMT, TIMM23, SOD2, ATAD3A, MUP3, LETM1, AFG3L2, PINK1, TMEM135, NDUFS8, LNCBATE1, UQCRC1, ATG2A, SPIRE1, NDUFS2, VDAC1, NDUFS1, GCLM, RETREG1	514	572	20051	3.27354	1.06212e-08	1.15426e-10	1.09191e-10
	GOTERM_BP_FAT	GO:1901293~nucleoside phosphate biosynthetic process	34	6.12613	1.9537e-12	NDUFB9, MT-ND4L, PANK1, NDUFB5, NDUFA10, ATP5A1, ATP5G3, ENO1, ATP5O, ATP5L, MT-ND1, ATP5B, PPCS, LDHD, NAMPT, DRD1, NDUFV2, PPARGC1A, NDUFV1, NDUFA9, NDUFA6, ATP5PB, SDHD, SDHA, COASY, ADCY10, NDUFS8, UCK1, PKM, STIM1, G6PDX, NDUFS2, NDUFS1, ALDOA	514	300	20051	4.4211	1.08155e-08	1.16277e-10	1.09996e-10
	GOTERM_BP_FAT	GO:0072522~purine-containing compound biosynthetic process	31	5.58559	3.63731e-12	NDUFB9, MT-ND4L, PANK1, NDUFB5, NDUFA10, ATP5A1, ATP5G3, ENO1, ATP5O, ATP5L, MT-ND1, ATP5B, PPCS, LDHD, DRD1, NDUFV2, PPARGC1A, NDUFV1, NDUFA9, NDUFA6, ATP5PB, SDHD, SDHA, COASY, ADCY10, NDUFS8, PKM, STIM1, NDUFS2, NDUFS1, ALDOA	514	255	20051	4.74236	2.01362e-08	2.14176e-10	2.02606e-10
	GOTERM_BP_FAT	GO:0055085~transmembrane transport	79	14.2342	8.61035e-12	SLC25A1, OSCP1, MT-ND4L, SLC27A1, MT-CO1, CHD7, NDUFA10, PCSK9, SLC2A4, ATP5G3, MT-ND1, AKT2, PIM1, TMEM38B, SLC25A44, SCN1B, ATP6V1G1, SLC36A2, ACSL1, PDE4D, PRKCE, TIMM23, SDHD, SDHA, SHISA6, SLC9A2, AFG3L2, RBP4, NDUFS8, STIM1, SLC25A19, PEX3, HECW2, G6PDX, NDUFS2, VDAC1, SLC25A10, NDUFS1, ANK, NDUFB9, SLC43A3, NDUFB5, PTGER3, ATP5A1, ATP1A3, KCNA5, GLRX, ATP5O, ATP5L, ATP5B, SAMM50, GRPEL1, U…	514	1348	20051	2.28618	4.76668e-08	5.01666e-10	4.74566e-10
	GOTERM_BP_FAT	GO:0006006~glucose metabolic process	29	5.22523	9.37886e-12	PCX, GPT, PDHB, ENO1, KHK, GPI1, AKT2, LEPR, PGK1, APOD, DLAT, ACADM, PPARGC1A, PGM1, PDK2, PDK1, CBR2, PDHA1, MDH1, MDH2, PGAM1, MUP3, RBP4, PKM, GPD2, G6PDX, PGP, ALDOA, PFKM	514	231	20051	4.89733	5.19212e-08	5.4075e-10	5.11539e-10
	GOTERM_BP_FAT	GO:0006694~steroid biosynthetic process	25	4.5045	9.951e-12	IDI1, DHRS11, ABCD3, PRKAA2, INSIG1, TECR, MSMO1, HSD17B12, HSD17B10, TM7SF2, HSD11B1, NSDHL, CYB5R3, PMVK, PPARGC1A, FDFT1, SREBF1, DHCR24, LSS, CYP51, SQLE, LPCAT3, G6PDX, CYP1A1, MVD	514	169	20051	5.77067	5.5089e-08	5.67823e-10	5.37149e-10
	GOTERM_BP_FAT	GO:0019318~hexose metabolic process	31	5.58559	1.29923e-11	PCX, GPT, PDHB, ENO1, KHK, GPI1, AKT2, LEPR, PGK1, APOD, DLAT, ACADM, PPARGC1A, PGM1, PDK2, PDK1, CBR2, PDHA1, PMM1, MDH1, MDH2, PGAM1, MUP3, GALE, RBP4, PKM, GPD2, G6PDX, PGP, ALDOA, PFKM	514	268	20051	4.51232	7.19252e-08	7.33801e-10	6.94161e-10
	GOTERM_BP_FAT	GO:0006734~NADH metabolic process	14	2.52252	1.5853e-11	CBR2, MDH1, MDH2, IDH3G, DLST, ENO1, GPI1, PKM, GPD2, OGDH, IDH3B, PGK1, ALDOA, PFKM	514	41	20051	13.3204	8.77621e-08	8.86329e-10	8.3845e-10
	GOTERM_BP_FAT	GO:0005996~monosaccharide metabolic process	33	5.94595	1.79303e-11	PCX, GPT, PDHB, ENO1, KHK, GPI1, AKT2, LEPR, PGK1, APOD, DLAT, ACADM, PPARGC1A, PGM1, PDK2, PDK1, CBR2, PDHA1, PMM1, MDH1, MDH2, PRKCE, PGAM1, PGD, MUP3, GALE, RBP4, PKM, GPD2, G6PDX, PGP, ALDOA, PFKM	514	307	20051	4.19323	9.92617e-08	9.92439e-10	9.38828e-10
	GOTERM_BP_FAT	GO:0008202~steroid metabolic process	36	6.48649	2.30598e-11	IDI1, ACADVL, DHRS11, ABCD3, PRKAA2, INSIG1, TECR, PCSK9, ACAA1B, MSMO1, HSD17B12, HSD17B10, TSKU, TM7SF2, SULT1A1, HSD11B1, NSDHL, PIP4P1, CYB5R3, ACADL, PMVK, LEPR, SCD1, PPARGC1A, FDFT1, SREBF1, APOC3, DHCR24, LSS, CYP51, SQLE, CYP2D22, LPCAT3, G6PDX, CYP1A1, MVD	514	366	20051	3.83702	1.27659e-07	1.26372e-09	1.19546e-09
	GOTERM_BP_FAT	GO:0016126~sterol biosynthetic process	16	2.88288	2.57163e-11	IDI1, SREBF1, PRKAA2, INSIG1, DHCR24, MSMO1, LSS, CYP51, TM7SF2, SQLE, NSDHL, CYB5R3, G6PDX, PMVK, MVD, FDFT1	514	61	20051	10.2321	1.42366e-07	1.39549e-09	1.3201e-09
	GOTERM_BP_FAT	GO:0043648~dicarboxylic acid metabolic process	19	3.42342	3.55065e-11	PCX, MDH1, MDH2, IDH3G, DLST, SDHA, DDO, ALDH4A1, CS, GRHPR, ACLY, OGDH, ME1, IDH3B, ME2, GCLM, PRODH, DLD, ACOT4	514	96	20051	7.72068	1.96564e-07	1.90804e-09	1.80497e-09
	GOTERM_BP_FAT	GO:0008203~cholesterol metabolic process	22	3.96396	5.24417e-11	IDI1, SREBF1, PRKAA2, INSIG1, APOC3, PCSK9, DHCR24, MSMO1, LSS, TSKU, CYP51, TM7SF2, SQLE, NSDHL, PIP4P1, CYB5R3, LPCAT3, G6PDX, PMVK, LEPR, MVD, FDFT1	514	138	20051	6.21894	2.90317e-07	2.79101e-09	2.64024e-09
	GOTERM_BP_FAT	GO:0006695~cholesterol biosynthetic process	15	2.7027	7.18794e-11	IDI1, SREBF1, PRKAA2, INSIG1, DHCR24, MSMO1, LSS, CYP51, TM7SF2, NSDHL, CYB5R3, G6PDX, PMVK, MVD, FDFT1	514	55	20051	10.639	3.97924e-07	3.75333e-09	3.55057e-09
	GOTERM_BP_FAT	GO:1902653~secondary alcohol biosynthetic process	15	2.7027	7.18794e-11	IDI1, SREBF1, PRKAA2, INSIG1, DHCR24, MSMO1, LSS, CYP51, TM7SF2, NSDHL, CYB5R3, G6PDX, PMVK, MVD, FDFT1	514	55	20051	10.639	3.97924e-07	3.75333e-09	3.55057e-09
	GOTERM_BP_FAT	GO:1902652~secondary alcohol metabolic process	22	3.96396	1.36227e-10	IDI1, SREBF1, PRKAA2, INSIG1, APOC3, PCSK9, DHCR24, MSMO1, LSS, TSKU, CYP51, TM7SF2, SQLE, NSDHL, PIP4P1, CYB5R3, LPCAT3, G6PDX, PMVK, LEPR, MVD, FDFT1	514	145	20051	5.91872	7.54151e-07	7.04687e-09	6.6662e-09
	GOTERM_BP_FAT	GO:0016125~sterol metabolic process	22	3.96396	1.77039e-10	IDI1, SREBF1, PRKAA2, INSIG1, APOC3, PCSK9, DHCR24, MSMO1, LSS, TSKU, CYP51, TM7SF2, SQLE, NSDHL, PIP4P1, CYB5R3, LPCAT3, G6PDX, PMVK, LEPR, MVD, FDFT1	514	147	20051	5.83819	9.80085e-07	9.07323e-09	8.58309e-09
	GOTERM_BP_FAT	GO:0006122~mitochondrial electron transport, ubiquinol to cytochrome c	9	1.62162	2.00011e-10	UQCRQ, UQCRC1, UQCRFS1, CYCS, MT-CYTB, UQCR10, UQCRC2, CYC1, UQCRH	514	13	20051	27.0067	1.10726e-06	1.01565e-08	9.60786e-09
	GOTERM_BP_FAT	GO:0072329~monocarboxylic acid catabolic process	21	3.78378	2.48069e-10	ACADVL, ABCD3, ECI1, ACAA1B, PGD, ACACB, HSD17B10, ACAT2, HADHB, HADHA, NUDT7, ACADL, ACOX2, AKT2, LDHD, ACOT2, ECHDC1, ACADM, ADTRP, CRAT, TUBA8	514	135	20051	6.06818	1.37331e-06	1.24824e-08	1.18081e-08
	GOTERM_BP_FAT	GO:0044262~cellular carbohydrate metabolic process	32	5.76577	3.00456e-10	MTCH2, GBE1, RORC, RORA, GPT, PYGL, ACACB, KHK, HSD11B1, GYS1, UGP2, GYG, AKT2, B3GALT1, LEPR, ACADM, PPARGC1A, PGM1, PDK2, PDK1, PRKCE, IGFBP3, PGAM1, AGL, PGD, MUP3, BCKDK, PPP1R1A, GPD2, PGP, NUPR1, PFKM	514	323	20051	3.86474	1.66332e-06	1.49822e-08	1.41728e-08
	GOTERM_BP_FAT	GO:0009062~fatty acid catabolic process	19	3.42342	3.71881e-10	ACADVL, ABCD3, ECI1, ACAA1B, ACACB, HSD17B10, ACAT2, HADHB, HADHA, NUDT7, ACADL, ACOX2, AKT2, ACOT2, ECHDC1, ACADM, ADTRP, CRAT, TUBA8	514	110	20051	6.73804	2.05873e-06	1.83782e-08	1.73855e-08
	GOTERM_BP_FAT	GO:0019674~NAD metabolic process	15	2.7027	5.11704e-10	CBR2, MDH1, MDH2, IDH3G, DLST, ENO1, GPI1, PKM, GPD2, NAMPT, OGDH, IDH3B, PGK1, ALDOA, PFKM	514	63	20051	9.28803	2.83279e-06	2.48624e-08	2.35193e-08
	GOTERM_BP_FAT	GO:0016052~carbohydrate catabolic process	23	4.14414	5.12071e-10	MTCH2, PRKAA2, ENTPD5, AGL, PGAM1, ENO1, PYGL, PGD, KHK, HSD11B1, GPI1, MLXIPL, GALE, PKM, GPD2, OGDH, PGK1, CHIL3, NUPR1, ALDOA, PPARGC1A, PFKM, PGM1	514	171	20051	5.24692	2.83482e-06	2.48624e-08	2.35193e-08
	GOTERM_BP_FAT	GO:0098662~inorganic cation transmembrane transport	50	9.00901	5.47433e-10	MT-ND4L, MT-CO1, CHD7, NDUFA10, PCSK9, ATP5G3, MT-ND1, TMEM38B, SCN1B, ATP6V1G1, SLC36A2, PDE4D, PRKCE, SDHD, SDHA, SLC9A2, AFG3L2, NDUFS8, STIM1, HECW2, G6PDX, NDUFS2, NDUFS1, NDUFB9, NDUFB5, PTGER3, ATP5A1, ATP1A3, KCNA5, GLRX, ATP5O, ATP5L, ATP5B, DRD1, NDUFV2, NDUFV1, NDUFA9, NDUFA6, ATP5PB, KCNB1, KCNJ15, MYO5A, ATOX1, LETM1, SLC6A6, SLC6A9, UQCRQ, LCN2, MT-CYTB, FXYD6	514	722	20051	2.7015	3.03058e-06	2.63482e-08	2.49248e-08
	GOTERM_BP_FAT	GO:0006066~alcohol metabolic process	32	5.76577	6.38718e-10	IDI1, PECR, PRKAA2, INSIG1, GDE1, PCSK9, MSMO1, TSKU, TM7SF2, ALDH3B2, NSDHL, PIP4P1, CYB5R3, ALDH2, RDH11, PMVK, LEPR, FDFT1, SREBF1, APOC3, DHCR24, LSS, CYP51, SQLE, RBP4, CYP2D22, LPCAT3, GPD2, G6PDX, PGP, CYP1A1, MVD	514	333	20051	3.74868	3.53594e-06	3.04768e-08	2.88304e-08
	GOTERM_BP_FAT	GO:0044242~cellular lipid catabolic process	27	4.86486	6.9021e-10	ACADVL, DAGLA, ABCD3, ECI1, MGST2, ACAA1B, ABHD5, HSD17B10, ACACB, ACAT2, ACADL, AKT2, LIPG, ACADM, DDHD2, APOC3, SORL1, HADHB, BSCL2, HADHA, NUDT7, ACOX2, ACOT2, ECHDC1, ADTRP, CRAT, TUBA8	514	241	20051	4.37038	3.82099e-06	3.26522e-08	3.08884e-08
	GOTERM_BP_FAT	GO:0006635~fatty acid beta-oxidation	16	2.88288	7.27851e-10	ACADVL, ABCD3, ECI1, ACAA1B, ACACB, HSD17B10, ACAT2, HADHB, HADHA, ACADL, ACOX2, AKT2, ECHDC1, ACADM, CRAT, TUBA8	514	76	20051	8.21257	4.02938e-06	3.41411e-08	3.22968e-08
	GOTERM_BP_FAT	GO:0034440~lipid oxidation	20	3.6036	7.72976e-10	ACADVL, ABCD3, DGAT1, ECI1, FMO1, ACAA1B, ACACB, HSD17B10, ACAT2, HADHB, HADHA, ACADL, ACOX2, AKT2, ECHDC1, APOD, ACADM, PPARGC1A, CRAT, TUBA8	514	129	20051	6.04802	4.27919e-06	3.59531e-08	3.4011e-08
	GOTERM_BP_FAT	GO:0098660~inorganic ion transmembrane transport	52	9.36937	8.73067e-10	MT-ND4L, MT-CO1, CHD7, NDUFA10, PCSK9, ATP5G3, MT-ND1, TMEM38B, SCN1B, ATP6V1G1, SLC36A2, PDE4D, PRKCE, SDHD, SDHA, SLC9A2, AFG3L2, NDUFS8, STIM1, HECW2, G6PDX, NDUFS2, SLC25A10, NDUFS1, ANK, NDUFB9, NDUFB5, PTGER3, ATP5A1, ATP1A3, KCNA5, GLRX, ATP5O, ATP5L, ATP5B, DRD1, NDUFV2, NDUFV1, NDUFA9, NDUFA6, ATP5PB, KCNB1, KCNJ15, MYO5A, ATOX1, LETM1, SLC6A6, SLC6A9, UQCRQ, LCN2, MT-CYTB, FXYD6	514	780	20051	2.60065	4.83329e-06	4.02702e-08	3.80948e-08
	GOTERM_BP_FAT	GO:0006085~acetyl-CoA biosynthetic process	9	1.62162	9.5582e-10	ACLY, PDHX, PDHA1, PPCS, MPC1, MPC2, PDHB, DLAT, DLD	514	15	20051	23.4058	5.2914e-06	4.37228e-08	4.13609e-08
	GOTERM_BP_FAT	GO:0044724~single-organism carbohydrate catabolic process	21	3.78378	1.0296e-09	MTCH2, PRKAA2, ENTPD5, AGL, PGAM1, ENO1, PYGL, PGD, KHK, GPI1, MLXIPL, GALE, PKM, GPD2, OGDH, PGK1, NUPR1, ALDOA, PPARGC1A, PFKM, PGM1	514	146	20051	5.61099	5.69984e-06	4.67117e-08	4.41883e-08
	GOTERM_BP_FAT	GO:0034220~ion transmembrane transport	61	10.991	1.11535e-09	MT-ND4L, SLC27A1, MT-CO1, CHD7, NDUFA10, PCSK9, ATP5G3, MT-ND1, AKT2, TMEM38B, SCN1B, ATP6V1G1, SLC36A2, ACSL1, PDE4D, PRKCE, SDHD, SDHA, SHISA6, SLC9A2, AFG3L2, RBP4, NDUFS8, STIM1, HECW2, G6PDX, NDUFS2, SLC25A10, NDUFS1, ANK, NDUFB9, NDUFB5, PTGER3, ATP5A1, ATP1A3, KCNA5, GLRX, ATP5O, ATP5L, ATP5B, DRD1, SLC25A20, NDUFV2, PPARGC1A, NDUFV1, NDUFA9, TMEM120B, NDUFA6, ATP5PB, KCNB1, KCNJ15, MYO5A,…	514	1011	20051	2.3537	6.17458e-06	5.0191e-08	4.74796e-08
	GOTERM_BP_FAT	GO:0098655~cation transmembrane transport	54	9.72973	1.34884e-09	MT-ND4L, MT-CO1, CHD7, NDUFA10, PCSK9, ATP5G3, MT-ND1, TMEM38B, SCN1B, ATP6V1G1, SLC36A2, PDE4D, PRKCE, SDHD, SDHA, SHISA6, SLC9A2, AFG3L2, NDUFS8, STIM1, HECW2, G6PDX, NDUFS2, NDUFS1, NDUFB9, NDUFB5, PTGER3, ATP5A1, ATP1A3, KCNA5, GLRX, ATP5O, ATP5L, ATP5B, DRD1, SLC25A20, NDUFV2, PPARGC1A, NDUFV1, NDUFA9, NDUFA6, ATP5PB, KCNB1, KCNJ15, MYO5A, ATOX1, LETM1, SLC6A6, PINK1, SLC6A9, UQCRQ, LCN2, MT…	514	839	20051	2.51076	7.46715e-06	6.02083e-08	5.69559e-08
	GOTERM_BP_FAT	GO:0006120~mitochondrial electron transport, NADH to ubiquinone	11	1.98198	1.42542e-09	NDUFB9, PINK1, NDUFS8, NDUFA10, NDUFS2, NDUFS1, COQ9, NDUFV2, DLD, NDUFV1, MT-ND1	514	29	20051	14.7968	7.89112e-06	6.31178e-08	5.97082e-08
	GOTERM_BP_FAT	GO:0016042~lipid catabolic process	32	5.76577	1.86775e-09	ACADVL, DAGLA, ABCD3, ECI1, MGST2, ACAA1B, ABHD5, HSD17B10, ACACB, ACAT2, HSD11B1, ACADL, AKT2, LIPG, ACADM, PLA2G12A, PRKCE, CIDEA, DDHD2, APOC3, SORL1, HADHB, BSCL2, HADHA, NUDT7, ACOX2, ASPG, ACOT2, ECHDC1, ADTRP, CRAT, TUBA8	514	348	20051	3.5871	1.03398e-05	8.20475e-08	7.76154e-08
	GOTERM_BP_FAT	GO:0019395~fatty acid oxidation	19	3.42342	2.10322e-09	ACADVL, ABCD3, DGAT1, ECI1, FMO1, ACAA1B, ACACB, HSD17B10, ACAT2, HADHB, HADHA, ACADL, ACOX2, AKT2, ECHDC1, ACADM, PPARGC1A, CRAT, TUBA8	514	122	20051	6.07529	1.16434e-05	9.16641e-08	8.67125e-08
	GOTERM_BP_FAT	GO:0006811~ion transport	87	15.6757	2.55219e-09	SLC25A1, MT-ND4L, SLC27A1, ABCD3, ATP8A1, MT-CO1, CHD7, NDUFA10, PCSK9, ATP5G3, MT-ND1, SLC25A48, MPC1, AKT2, MPC2, TMEM38B, SLC25A44, SCN1B, PLA2G12A, ATP6V1G1, SLC36A2, ACSL1, MMGT1, PDE4D, PRKCE, ACSL3, SDHD, SDHA, SHISA6, SLC9A2, AFG3L2, RBP4, NDUFS8, STIM1, SLC25A19, HECW2, CRY2, G6PDX, NDUFS2, PLIN2, VDAC1, SLC25A10, NDUFS1, NAT8L, ANK, PTGES, NDUFB9, EPB41, NDUFB5, PTGER3, ATP5A1, ATP1A3, …	514	1749	20051	1.94045	1.41288e-05	1.09641e-07	1.03719e-07
	GOTERM_BP_FAT	GO:0015672~monovalent inorganic cation transport	41	7.38739	2.55533e-09	NDUFB9, MT-ND4L, MT-CO1, NDUFB5, NDUFA10, PTGER3, ATP5A1, PCSK9, ATP1A3, KCNA5, GLRX, ATP5G3, ATP5O, ATP5L, MT-ND1, ATP5B, AKT2, NDUFV2, TMEM38B, NDUFV1, SCN1B, NDUFA9, ATP6V1G1, SLC36A2, NDUFA6, ATP5PB, KCNB1, KCNJ15, MYO5A, SDHD, SDHA, SLC9A2, SLC6A6, NDUFS8, SLC6A9, UQCRQ, HECW2, NDUFS2, FXYD6, MT-CYTB, NDUFS1	514	545	20051	2.93468	1.41462e-05	1.09641e-07	1.03719e-07
	GOTERM_BP_FAT	GO:0006096~glycolytic process	16	2.88288	3.72991e-09	MTCH2, PRKAA2, ENTPD5, PGAM1, ENO1, KHK, GPI1, MLXIPL, GALE, PKM, OGDH, PGK1, NUPR1, ALDOA, PPARGC1A, PFKM	514	85	20051	7.34301	2.06486e-05	1.58808e-07	1.50229e-07
	GOTERM_BP_FAT	GO:0016051~carbohydrate biosynthetic process	25	4.5045	3.94715e-09	PCX, GBE1, GPT, ENO1, GPI1, GYS1, UGP2, GYG, AKT2, B3GALT1, LEPR, PGK1, ACADM, PPARGC1A, PDK2, MDH1, MDH2, PGAM1, AGL, PGD, MUP3, RBP4, GPD2, G6PDX, PGP	514	225	20051	4.33441	2.18512e-05	1.66775e-07	1.57766e-07
	GOTERM_BP_FAT	GO:0006757~ATP generation from ADP	16	2.88288	4.41306e-09	MTCH2, PRKAA2, ENTPD5, PGAM1, ENO1, KHK, GPI1, MLXIPL, GALE, PKM, OGDH, PGK1, NUPR1, ALDOA, PPARGC1A, PFKM	514	86	20051	7.25762	2.44304e-05	1.85048e-07	1.75051e-07
	GOTERM_BP_FAT	GO:1901615~organic hydroxy compound metabolic process	40	7.20721	4.69918e-09	IDI1, PECR, MTCH2, ABCD3, PRKAA2, INSIG1, GDE1, PCSK9, ACAA1B, MSMO1, HSD17B10, TSKU, TM7SF2, SULT1A1, ALDH3B2, NSDHL, PIP4P1, CYB5R3, ALDH2, RDH11, LDHD, PMVK, LEPR, DRD1, FDFT1, SREBF1, APOC3, MYO5A, DHCR24, LSS, CYP51, SQLE, RBP4, CYP2D22, LPCAT3, GPD2, G6PDX, PGP, CYP1A1, MVD	514	534	20051	2.92208	2.60143e-05	1.95564e-07	1.84999e-07
	GOTERM_BP_FAT	GO:0006086~acetyl-CoA biosynthetic process from pyruvate	7	1.26126	7.30454e-09	PDHX, PDHA1, MPC1, MPC2, PDHB, DLAT, DLD	514	8	20051	34.1335	4.04371e-05	2.99486e-07	2.83308e-07
	GOTERM_BP_FAT	GO:0061732~mitochondrial acetyl-CoA biosynthetic process from pyruvate	7	1.26126	7.30454e-09	PDHX, PDHA1, MPC1, MPC2, PDHB, DLAT, DLD	514	8	20051	34.1335	4.04371e-05	2.99486e-07	2.83308e-07
	GOTERM_BP_FAT	GO:0009179~purine ribonucleoside diphosphate metabolic process	17	3.06306	7.72741e-09	ENTPD4B, MTCH2, PRKAA2, ENTPD5, PGAM1, ENO1, KHK, GPI1, MLXIPL, GALE, PKM, OGDH, PGK1, NUPR1, ALDOA, PPARGC1A, PFKM	514	103	20051	6.4385	4.2778e-05	3.12198e-07	2.95334e-07
	GOTERM_BP_FAT	GO:0009135~purine nucleoside diphosphate metabolic process	17	3.06306	7.72741e-09	ENTPD4B, MTCH2, PRKAA2, ENTPD5, PGAM1, ENO1, KHK, GPI1, MLXIPL, GALE, PKM, OGDH, PGK1, NUPR1, ALDOA, PPARGC1A, PFKM	514	103	20051	6.4385	4.2778e-05	3.12198e-07	2.95334e-07
	GOTERM_BP_FAT	GO:0044272~sulfur compound biosynthetic process	19	3.42342	9.70482e-09	PDHX, PDHA1, ELOVL5, ACSL1, ELOVL3, MGST2, ELOVL6, PDHB, ACACB, ACACA, ACLY, PPCS, MPC1, MPC2, DLAT, GCLM, DLD, PDK2, PDK1	514	134	20051	5.53123	5.37244e-05	3.89248e-07	3.68221e-07
	GOTERM_BP_FAT	GO:0000038~very long-chain fatty acid metabolic process	11	1.98198	1.13801e-08	ABCD3, ACOX2, ELOVL5, ACSL1, TECR, ELOVL3, ACOT2, ELOVL6, ACAA1B, ACOT4, ACOT3	514	35	20051	12.2602	6.29984e-05	4.53158e-07	4.28679e-07
	GOTERM_BP_FAT	GO:0046364~monosaccharide biosynthetic process	16	2.88288	1.56053e-08	PCX, MDH1, MDH2, PGAM1, GPT, ENO1, PGD, MUP3, GPI1, RBP4, GPD2, G6PDX, PGP, LEPR, PGK1, PPARGC1A	514	94	20051	6.63995	8.63875e-05	6.16969e-07	5.8364e-07
	GOTERM_BP_FAT	GO:0006812~cation transport	66	11.8919	1.74846e-08	MT-ND4L, MT-CO1, CHD7, NDUFA10, PCSK9, ATP5G3, MT-ND1, SLC25A48, AKT2, TMEM38B, SCN1B, ATP6V1G1, SLC36A2, MMGT1, PDE4D, PRKCE, SDHD, SDHA, SHISA6, SLC9A2, AFG3L2, NDUFS8, STIM1, SLC25A19, HECW2, G6PDX, NDUFS2, VDAC1, NDUFS1, NAT8L, NDUFB9, EPB41, NDUFB5, PTGER3, ATP5A1, ATP1A3, LPAR3, KCNA5, GLRX, ATP5O, ATP5L, ATP5B, PACSIN3, DRD1, SLC25A20, NDUFV2, PPARGC1A, NDUFV1, NDUFA9, NDUFA6, DMPK, ATP5PB…	514	1224	20051	2.10347	9.67903e-05	6.86365e-07	6.49288e-07
	GOTERM_BP_FAT	GO:0046031~ADP metabolic process	16	2.88288	2.42145e-08	MTCH2, PRKAA2, ENTPD5, PGAM1, ENO1, KHK, GPI1, MLXIPL, GALE, PKM, OGDH, PGK1, NUPR1, ALDOA, PPARGC1A, PFKM	514	97	20051	6.43459	0.000134042	9.43854e-07	8.92867e-07
	GOTERM_BP_FAT	GO:0009185~ribonucleoside diphosphate metabolic process	17	3.06306	3.0153e-08	ENTPD4B, MTCH2, PRKAA2, ENTPD5, PGAM1, ENO1, KHK, GPI1, MLXIPL, GALE, PKM, OGDH, PGK1, NUPR1, ALDOA, PPARGC1A, PFKM	514	113	20051	5.86872	0.000166913	1.16711e-06	1.10407e-06
	GOTERM_BP_FAT	GO:0051193~regulation of cofactor metabolic process	14	2.52252	3.09263e-08	MTCH2, PRKAA2, ENTPD5, PGAM1, HSD11B1, MLXIPL, SLC6A9, ME1, ME2, NUPR1, PPARGC1A, PDK2, TMEM14C, PDK1	514	72	20051	7.58522	0.000171193	1.18873e-06	1.12451e-06
	GOTERM_BP_FAT	GO:0019216~regulation of lipid metabolic process	33	5.94595	3.53464e-08	SLC27A1, ACADVL, PRKAA2, PCX, INSIG1, RORC, RORA, FITM2, ABHD5, ACACB, ACADL, AKT2, ORMDL3, APOD, SCD1, PPARGC1A, PDK2, PDK1, SREBF1, DGAT1, ELOVL5, PRKCE, CIDEA, PPP2R5A, APOC3, FMO1, ACSL3, SORL1, MUP3, BSCL2, MLXIPL, LPCAT3, THRSP	514	416	20051	3.09452	0.000195659	1.34926e-06	1.27637e-06
	GOTERM_BP_FAT	GO:0009725~response to hormone	54	9.72973	3.66819e-08	SLC27A1, RNF14, PCSK9, GPT, SLC2A4, KHK, GPI1, AKT2, CASP3, ME1, LONP1, LEPR, UQCRFS1, PRKACA, TIMP4, PDK2, YWHAG, FADS1, SREBF1, ACSL1, VPS13C, PRKCE, NCOA4, PRLR, HADHA, RBP4, PKM, CRY2, ADTRP, PRKAA2, WBP2, INSIG1, ATP1A3, ACACA, SULT1A1, UCP3, CYC1, ZBTB7B, PPARGC1A, SH2B2, ESRRA, NTRK3, AGL, ADRM1, SERPINA3K, APOC3, MYO5A, DHCR24, FBXO32, SORL1, CYP51, KLF9, MT-CYTB, GCLM	514	925	20051	2.27732	0.000203051	1.39065e-06	1.31552e-06
	GOTERM_BP_FAT	GO:0006109~regulation of carbohydrate metabolic process	23	4.14414	3.74839e-08	MTCH2, PRKAA2, PRKCE, IGFBP3, ENTPD5, PGAM1, RORC, RORA, GPT, ACACB, KHK, MUP3, BCKDK, HSD11B1, MLXIPL, AKT2, PGP, LEPR, ACADM, NUPR1, PPARGC1A, PDK2, PDK1	514	215	20051	4.17313	0.00020749	1.41139e-06	1.33514e-06
	GOTERM_BP_FAT	GO:0009132~nucleoside diphosphate metabolic process	18	3.24324	4.213e-08	ENTPD4B, MTCH2, PRKAA2, ENTPD5, PGAM1, ENO1, KHK, GPI1, MLXIPL, GALE, NUDT7, PKM, OGDH, PGK1, NUPR1, ALDOA, PPARGC1A, PFKM	514	131	20051	5.36012	0.000233204	1.5756e-06	1.49049e-06
	GOTERM_BP_FAT	GO:0006165~nucleoside diphosphate phosphorylation	16	2.88288	4.85422e-08	MTCH2, PRKAA2, ENTPD5, PGAM1, ENO1, KHK, GPI1, MLXIPL, GALE, PKM, OGDH, PGK1, NUPR1, ALDOA, PPARGC1A, PFKM	514	102	20051	6.11917	0.000268693	1.80323e-06	1.70582e-06
	GOTERM_BP_FAT	GO:0055088~lipid homeostasis	21	3.78378	5.23316e-08	GRAMD1B, MTCH2, PRKAA2, DGAT1, INSIG1, APOC3, PCSK9, RORA, FITM2, ABHD5, TLCD3B, ACACA, TSKU, MLXIPL, ACOX2, LNCBATE1, ORMDL3, LIPG, TLCD4, TLCD1, SCD1	514	183	20051	4.47653	0.000289666	1.93104e-06	1.82672e-06
	GOTERM_BP_FAT	GO:0046939~nucleotide phosphorylation	16	2.88288	8.21459e-08	MTCH2, PRKAA2, ENTPD5, PGAM1, ENO1, KHK, GPI1, MLXIPL, GALE, PKM, OGDH, PGK1, NUPR1, ALDOA, PPARGC1A, PFKM	514	106	20051	5.88826	0.000454656	3.01111e-06	2.84845e-06
	GOTERM_BP_FAT	GO:0048878~chemical homeostasis	69	12.4324	9.33584e-08	MTCH2, CHD7, PCSK9, CIB2, RORA, PYGL, SLC2A4, CXCL13, AACS, TSKU, GPI1, MPC2, LIPG, LEPR, SCD1, PRKACA, TMEM38B, SCN1B, PDK2, ATP6V1G1, DGAT1, GLRX3, PDE4D, PRKCE, NCOA4, TLCD3B, MUP3, SLC9A2, AFG3L2, GPRC5B, RBP4, STIM1, ACOX2, CRY2, TMEM79, TLCD4, TLCD1, ANK, GRAMD1B, COX19, PRKAA2, INSIG1, PTGER3, ATP1A3, LPAR3, KCNA5, FITM2, ABHD5, ACACA, ATP5B, ORMDL3, DRD1, PPARGC1A, SH2B2, DMPK, KCNB1, APO…	514	1365	20051	1.97192	0.000516698	3.3996e-06	3.21595e-06
	GOTERM_BP_FAT	GO:0010876~lipid localization	35	6.30631	1.07409e-07	GRAMD1B, SLC27A1, ABCD3, ATP8A1, SLC43A3, PCSK9, FITM2, ABHD5, ACACB, TSKU, ACAT2, AKT2, LIPG, APOD, SLC25A20, PRELID3B, SREBF1, PLA2G12A, STARD5, DGAT1, ACSL1, IGFBP3, STARD10, CIDEA, APOC3, ACSL3, MUP3, BSCL2, RBP4, TMEM135, LPCAT3, CRY2, ATG2A, PLIN2, PTGES	514	482	20051	2.83266	0.000594437	3.88566e-06	3.67576e-06
	GOTERM_BP_FAT	GO:0030258~lipid modification	25	4.5045	1.64074e-07	ACADVL, ABCD3, ECI1, ACAA1B, HSD17B10, ACACB, ACAT2, PIP4P1, ACADL, AKT2, B3GALT1, APOD, SCD1, ACADM, PPARGC1A, DGAT1, FMO1, HADHB, HADHA, ACOX2, LPCAT3, CYP1A1, ECHDC1, CRAT, TUBA8	514	273	20051	3.57232	0.0009079	5.89707e-06	5.57851e-06
	GOTERM_BP_FAT	GO:0006094~gluconeogenesis	14	2.52252	1.78524e-07	PCX, MDH1, MDH2, PGAM1, GPT, ENO1, MUP3, GPI1, RBP4, GPD2, PGP, LEPR, PGK1, PPARGC1A	514	83	20051	6.57995	0.000987822	6.37504e-06	6.03066e-06
	GOTERM_BP_FAT	GO:0001676~long-chain fatty acid metabolic process	17	3.06306	1.9899e-07	SLC27A1, DAGLA, ABCD3, GPX4, ACSL1, MYO5A, ELOVL6, ACSL3, CYP2D22, ACADL, ACOT2, CYP1A1, ACOT1, ADTRP, FADS1, ACOT4, ACOT3	514	129	20051	5.14082	0.001101	7.06032e-06	6.67892e-06
	GOTERM_BP_FAT	GO:0010675~regulation of cellular carbohydrate metabolic process	20	3.6036	2.13567e-07	MTCH2, PRKCE, IGFBP3, PGAM1, RORC, RORA, GPT, ACACB, KHK, MUP3, BCKDK, HSD11B1, AKT2, PGP, LEPR, ACADM, NUPR1, PPARGC1A, PDK2, PDK1	514	181	20051	4.31047	0.00118161	7.52927e-06	7.12254e-06
	GOTERM_BP_FAT	GO:0046165~alcohol biosynthetic process	17	3.06306	2.2165e-07	IDI1, SREBF1, PRKAA2, INSIG1, DHCR24, MSMO1, LSS, CYP51, TM7SF2, NSDHL, CYB5R3, LPCAT3, G6PDX, PMVK, PGP, MVD, FDFT1	514	130	20051	5.10127	0.0012263	7.76477e-06	7.34532e-06
	GOTERM_BP_FAT	GO:0042407~cristae formation	8	1.44144	2.65826e-07	LETM1, AFG3L2, APOO, PINK1, CHCHD3, SAMM50, CHCHD10, IMMT	514	19	20051	16.4251	0.00147053	9.25374e-06	8.75385e-06
	GOTERM_BP_FAT	GO:1902582~single-organism intracellular transport	49	8.82883	3.14559e-07	SNAP25, MT-ND4L, NDUFA10, PCSK9, MT-ND1, RIMS4, KIF1C, PRKACA, CADPS2, PRKCE, TIMM23, MYRIP, SDHD, SDHA, NDUFS8, RILPL2, PEX3, CRY2, TBC1D24, NDUFS2, NDUFS1, NAPA, GRAMD1B, NDUFB9, NRN1, NDUFB5, INSIG1, ATP5A1, TRAK1, ATP5O, TOB1, ATP5L, ATP5B, SAMM50, GRPEL1, MAP6, APOD, DRD1, NDUFV2, NDUFV1, SEC31B, NDUFA9, PEX16, NDUFA6, PEX19, ATP5PB, MYO5A, PEX14, DLG2	514	856	20051	2.23303	0.00173988	1.08168e-05	1.02324e-05
	GOTERM_BP_FAT	GO:0019319~hexose biosynthetic process	14	2.52252	3.14634e-07	PCX, MDH1, MDH2, PGAM1, GPT, ENO1, MUP3, GPI1, RBP4, GPD2, PGP, LEPR, PGK1, PPARGC1A	514	87	20051	6.27743	0.0017403	1.08168e-05	1.02324e-05
	GOTERM_BP_FAT	GO:0042592~homeostatic process	92	16.5766	3.61973e-07	SLC27A1, ACADVL, MTCH2, CHD7, PCSK9, CIB2, RORA, PYGL, SLC2A4, CXCL13, AACS, TSKU, GPI1, RASSF2, ACADL, MPC2, CASP3, LIPG, LEPR, SCD1, PRKACA, TMEM38B, MAP3K4, SCN1B, PDK2, TMEM14C, CADPS2, ATP6V1G1, KLF13, DGAT1, GLRX3, PDE4D, PRKCE, NCOA4, TLCD3B, MUP3, SLC9A2, AFG3L2, GPRC5B, RBP4, STIM1, ACOX2, CRY2, G6PDX, TMEM79, TLCD4, TLCD1, ALDOA, DLD, ANK, PTGES, GRAMD1B, COX19, PRKAA2, INSIG1, PTGER3, …	514	2105	20051	1.70494	0.00200188	1.23674e-05	1.16993e-05
	GOTERM_BP_FAT	GO:1901617~organic hydroxy compound biosynthetic process	22	3.96396	4.21386e-07	IDI1, SREBF1, ABCD3, PRKAA2, INSIG1, MYO5A, DHCR24, MSMO1, HSD17B10, LSS, CYP51, TM7SF2, SQLE, NSDHL, CYP2D22, CYB5R3, LPCAT3, G6PDX, PMVK, PGP, MVD, FDFT1	514	227	20051	3.78068	0.00233007	1.4309e-05	1.35361e-05
	GOTERM_BP_FAT	GO:0051196~regulation of coenzyme metabolic process	12	2.16216	8.32161e-07	HSD11B1, MLXIPL, MTCH2, PRKAA2, ENTPD5, PGAM1, ME1, ME2, NUPR1, PPARGC1A, PDK2, PDK1	514	66	20051	7.09268	0.00459625	2.80854e-05	2.65683e-05
	GOTERM_BP_FAT	GO:1905952~regulation of lipid localization	20	3.6036	1.00002e-06	SREBF1, DGAT1, ATP8A1, ACSL1, IGFBP3, CIDEA, APOC3, PCSK9, FITM2, ABHD5, ACACB, ACAT2, MUP3, TMEM135, AKT2, LPCAT3, CRY2, LIPG, PLIN2, PTGES	514	200	20051	3.90097	0.0055208	3.3546e-05	3.17339e-05
	GOTERM_BP_FAT	GO:1901137~carbohydrate derivative biosynthetic process	42	7.56757	1.06407e-06	NDUFB9, MT-ND4L, PANK1, NDUFB5, NDUFA10, ATP5A1, ATP5G3, PYGL, ENO1, SLC2A4, ART5, ATP5O, ATP5L, MT-ND1, ATP5B, PPCS, LDHD, B3GALT1, ST3GAL6, DRD1, NDUFV2, PPARGC1A, NDUFV1, NDUFA9, NDUFA6, PMM1, ATP5PB, ENTPD5, SDHD, SDHA, COASY, ADCY10, NDUFS8, UCK1, PKM, STIM1, G6PDX, NDUFS2, NDUFS1, STT3B, ALDOA, TKT	514	708	20051	2.31414	0.00587338	3.54797e-05	3.35631e-05
	GOTERM_BP_FAT	GO:0035337~fatty-acyl-CoA metabolic process	8	1.44144	2.21931e-06	NUDT7, DGAT1, ELOVL5, ACSL1, ELOVL3, ELOVL6, FITM2, ACSL3	514	25	20051	12.4831	0.0122109	7.3556e-05	6.95825e-05
	GOTERM_BP_FAT	GO:0016310~phosphorylation	98	17.6577	2.31675e-06	KLB, MT-ND4L, SLC27A1, MTCH2, MT-CO1, PANK1, NDUFA10, RORC, DIXDC1, ENO1, COX6A1, MT-ND1, RASSF2, AKT2, PIM1, LONP1, LEPR, PRKACA, MAP3K6, SEPHS2, MAP3K4, PDK2, PDK1, ACSL1, PRKCE, IGFBP3, ENTPD5, SDHD, SDHA, PRLR, UQCRC1, UQCRC2, ADTRP, NUPR1, LPAR3, NDRG2, UQCRH, PRDX3, PRDX1, BAG1, PMVK, PGK1, CYC1, DRD1, NDUFV2, PPARGC1A, NDUFV1, FN3K, HSPA9, DMPK, CHCHD10, COQ9, MLXIPL, UCK1, UQCRQ, OGDH, CY…	514	2389	20051	1.60023	0.0127437	7.63287e-05	7.22054e-05
	GOTERM_BP_FAT	GO:0005976~polysaccharide metabolic process	15	2.7027	2.41603e-06	GBE1, AGL, PYGL, KHK, GYS1, UGP2, PPP1R1A, GYG, AKT2, B3GALT1, LEPR, CHIL3, ACADM, PFKM, PGM1	514	120	20051	4.87622	0.0132861	7.91286e-05	7.48541e-05
	GOTERM_BP_FAT	GO:0032868~response to insulin	24	4.32432	2.69439e-06	ESRRA, SREBF1, SLC27A1, VPS13C, INSIG1, PCSK9, MYO5A, GPT, SLC2A4, SORL1, CYP51, KHK, HADHA, RBP4, PKM, AKT2, UCP3, CRY2, LONP1, ZBTB7B, YWHAG, FADS1, PDK2, SH2B2	514	297	20051	3.1523	0.0148054	8.7726e-05	8.29871e-05
	GOTERM_BP_FAT	GO:0009409~response to cold	11	1.98198	3.07893e-06	RBM3, TMEM135, SLC27A1, ACADVL, ACADL, UCP3, CIDEA, ACADM, SOD2, PRKACA, PPARGC1A	514	61	20051	7.03454	0.0169006	9.96603e-05	9.42766e-05
	GOTERM_BP_FAT	GO:1901566~organonitrogen compound biosynthetic process	68	12.2523	3.19733e-06	MT-ND4L, SLC27A1, PANK1, RMND1, NDUFA10, ATP5G3, ENO1, MT-ND1, PTMS, RBM3, NAMPT, B3GALT1, ACADM, SEPHS2, TMEM14C, ELOVL5, ELOVL3, MRPS2, ELOVL6, ACSL3, SDHD, SDHA, TLCD3B, COASY, CYP2D22, PKM, NDUFS8, STIM1, CHDH, DPYD, G6PDX, NDUFS2, NDUFS1, ALDOA, RBM24, MOCS1, BCAT2, PAOX, NDUFB9, GRB7, TRUB2, NDUFB5, ATP5A1, MGST2, ATP5O, MRPL12, TOB1, ATP5L, ATP5B, PPCS, ORMDL3, LDHD, PCBP2, DRD1, NDUFV2, P…	514	1476	20051	1.7972	0.0175447	0.000102891	9.73328e-05
	GOTERM_BP_FAT	GO:0006641~triglyceride metabolic process	14	2.52252	3.49775e-06	SREBF1, SLC27A1, DGAT1, ACSL1, INSIG1, DDHD2, APOC3, PCSK9, FITM2, ABHD5, SORL1, LIPG, THRSP, SCD1	514	107	20051	5.10408	0.0191773	0.000111265	0.000105254
	GOTERM_BP_FAT	GO:0019217~regulation of fatty acid metabolic process	14	2.52252	3.49775e-06	SREBF1, ACADVL, DGAT1, ELOVL5, INSIG1, APOC3, FMO1, ACACB, MLXIPL, ACADL, AKT2, PPARGC1A, PDK2, PDK1	514	107	20051	5.10408	0.0191773	0.000111265	0.000105254
	GOTERM_BP_FAT	GO:0006073~cellular glucan metabolic process	12	2.16216	4.01785e-06	GYS1, UGP2, PPP1R1A, GYG, AKT2, AGL, GBE1, LEPR, ACADM, PYGL, PFKM, PGM1	514	77	20051	6.07944	0.0219973	0.000126357	0.000119531
	GOTERM_BP_FAT	GO:0005977~glycogen metabolic process	12	2.16216	4.01785e-06	GYS1, UGP2, PPP1R1A, GYG, AKT2, AGL, GBE1, LEPR, ACADM, PYGL, PFKM, PGM1	514	77	20051	6.07944	0.0219973	0.000126357	0.000119531
	GOTERM_BP_FAT	GO:0044042~glucan metabolic process	12	2.16216	4.57106e-06	GYS1, UGP2, PPP1R1A, GYG, AKT2, AGL, GBE1, LEPR, ACADM, PYGL, PFKM, PGM1	514	78	20051	6.0015	0.024988	0.000142942	0.000135221
	GOTERM_BP_FAT	GO:1902580~single-organism cellular localization	55	9.90991	5.21829e-06	SNAP25, MT-ND4L, MTCH2, NDUFA10, PCSK9, MT-ND1, RIMS4, CNST, AKT2, KIF1C, PRKACA, CADPS2, PRKCE, PPP2R5A, TIMM23, MYRIP, ACSL3, SDHD, SDHA, NDUFS8, RILPL2, PEX3, CRY2, TBC1D24, NDUFS2, NDUFS1, NAPA, GRAMD1B, NDUFB9, NRN1, NDUFB5, INSIG1, ATP5A1, TRAK1, ATP5O, TOB1, ATP5L, ATP5B, SAMM50, GRPEL1, MAP6, APOD, DRD1, NDUFV2, NDUFV1, SEC31B, NDUFA9, PEX16, NDUFA6, PEX19, ATP5PB, KCNB1, MYO5A, PEX14, DL…	514	1116	20051	1.92252	0.0284753	0.000162265	0.0001535
	GOTERM_BP_FAT	GO:0006112~energy reserve metabolic process	13	2.34234	5.50397e-06	GBE1, AGL, PYGL, MUP3, GYS1, UGP2, PPP1R1A, GYG, AKT2, LEPR, ACADM, PFKM, PGM1	514	95	20051	5.33817	0.0300105	0.000170192	0.000160999
	GOTERM_BP_FAT	GO:0006081~cellular aldehyde metabolic process	12	2.16216	7.50499e-06	ALDH3B2, GRHPR, RBP4, ALDH2, RDH11, G6PDX, TALDO1, PGLS, PGD, TKT, ALDOA, KHK	514	82	20051	5.70874	0.0406965	0.000230779	0.000218312
	GOTERM_BP_FAT	GO:0033108~mitochondrial respiratory chain complex assembly	13	2.34234	7.63175e-06	NDUFA9, COX19, NDUFB9, NDUFA6, NDUFB5, NDUFA10, MT-ND1, SAMM50, NDUFS8, UQCRC1, UQCRFS1, NDUFS2, NDUFS1	514	98	20051	5.17476	0.0413694	0.00023338	0.000220773
	GOTERM_BP_FAT	GO:0061620~glycolytic process through glucose-6-phosphate	7	1.26126	7.77965e-06	GPI1, GALE, PKM, PGK1, ENO1, ALDOA, PFKM	514	20	20051	13.6534	0.042154	0.000236595	0.000223815
	GOTERM_BP_FAT	GO:0009083~branched-chain amino acid catabolic process	7	1.26126	1.06568e-05	ACAD8, BCKDHA, BCKDK, HSD17B10, DLD, SLC25A44, BCAT2	514	21	20051	13.0032	0.0572898	0.000322325	0.000304913
	GOTERM_BP_FAT	GO:0044264~cellular polysaccharide metabolic process	13	2.34234	1.15718e-05	GBE1, AGL, PYGL, GYS1, UGP2, PPP1R1A, GYG, AKT2, B3GALT1, LEPR, ACADM, PFKM, PGM1	514	102	20051	4.97183	0.062053	0.000348097	0.000329293
	GOTERM_BP_FAT	GO:0045833~negative regulation of lipid metabolic process	14	2.52252	1.36905e-05	ACADVL, SLC27A1, INSIG1, CIDEA, PPP2R5A, APOC3, FMO1, ACACB, SORL1, MUP3, BSCL2, ACADL, ORMDL3, APOD	514	121	20051	4.51352	0.0729902	0.000409605	0.000387478
	GOTERM_BP_FAT	GO:0006639~acylglycerol metabolic process	15	2.7027	1.59915e-05	SREBF1, SLC27A1, DAGLA, DGAT1, ACSL1, INSIG1, DDHD2, APOC3, PCSK9, FITM2, ABHD5, SORL1, LIPG, THRSP, SCD1	514	141	20051	4.14997	0.0847241	0.000475876	0.000450169
	GOTERM_BP_FAT	GO:0006638~neutral lipid metabolic process	15	2.7027	1.87716e-05	SREBF1, SLC27A1, DAGLA, DGAT1, ACSL1, INSIG1, DDHD2, APOC3, PCSK9, FITM2, ABHD5, SORL1, LIPG, THRSP, SCD1	514	143	20051	4.09193	0.0987032	0.00055562	0.000525605
	GOTERM_BP_FAT	GO:0061615~glycolytic process through fructose-6-phosphate	7	1.26126	1.89802e-05	GPI1, GALE, PKM, PGK1, ENO1, ALDOA, PFKM	514	23	20051	11.8725	0.0997432	0.000558804	0.000528618
	GOTERM_BP_FAT	GO:0043434~response to peptide hormone	30	5.40541	1.9771e-05	SLC27A1, INSIG1, PCSK9, GPT, SLC2A4, KHK, AKT2, UCP3, LONP1, CYC1, ZBTB7B, TIMP4, YWHAG, FADS1, PDK2, SH2B2, ESRRA, SREBF1, VPS13C, ADRM1, SERPINA3K, APOC3, MYO5A, SORL1, CYP51, HADHA, RBP4, PKM, CRY2, MT-CYTB	514	481	20051	2.43304	0.103676	0.000579009	0.000547731
	GOTERM_BP_FAT	GO:0042180~cellular ketone metabolic process	20	3.6036	2.28892e-05	NDUFA9, VKORC1L1, SREBF1, ACADVL, DGAT1, ELOVL5, PRKCE, INSIG1, APOC3, FMO1, COQ9, ACACB, MLXIPL, ACADL, AKT2, COQ8A, ALDOA, PPARGC1A, PDK2, PDK1	514	248	20051	3.14595	0.119016	0.000666798	0.000630778
	GOTERM_BP_FAT	GO:1901565~organonitrogen compound catabolic process	24	4.32432	2.56179e-05	ENTPD4B, ACAD8, BCKDHA, GDA, ENTPD5, PDE4D, DLST, GPT, HSD17B10, TRHDE, DDO, ALDH4A1, BCKDK, NUDT7, CYP2D22, ACADL, DPYD, CHIL3, PRODH, DLD, SLC25A44, BCAT2, PAOX, CHIL6	514	341	20051	2.74555	0.132225	0.000742383	0.00070228
	GOTERM_BP_FAT	GO:0006979~response to oxidative stress	30	5.40541	2.88166e-05	VKORC1L1, PRKAA2, MT-CO1, KCNA5, GLRX, MT-ND1, PRDX3, ALDH2, CASP3, UCP3, PRDX1, LONP1, APOD, PPARGC1A, PDK2, PDK1, NDUFA6, GPX4, DHCR24, SOD2, ATOX1, ATRN, PINK1, NDUFS8, ACOX2, G6PDX, TBC1D24, LCN2, NDUFS2, GCLM	514	491	20051	2.38349	0.147456	0.000830728	0.000785852
	GOTERM_BP_FAT	GO:0019320~hexose catabolic process	8	1.44144	3.02012e-05	GPI1, GALE, PKM, PGK1, ENO1, ALDOA, PFKM, KHK	514	36	20051	8.66883	0.153966	0.000861668	0.000815121
	GOTERM_BP_FAT	GO:0007007~inner mitochondrial membrane organization	8	1.44144	3.02012e-05	LETM1, AFG3L2, APOO, PINK1, CHCHD3, SAMM50, CHCHD10, IMMT	514	36	20051	8.66883	0.153966	0.000861668	0.000815121
	GOTERM_BP_FAT	GO:0009081~branched-chain amino acid metabolic process	7	1.26126	3.18811e-05	ACAD8, BCKDHA, BCKDK, HSD17B10, DLD, SLC25A44, BCAT2	514	25	20051	10.9227	0.161798	0.000904934	0.000856049
	GOTERM_BP_FAT	GO:1901700~response to oxygen-containing compound	84	15.1351	4.00825e-05	SLC27A1, RORC, PCSK9, CIB2, RORA, GPT, SLC2A4, CXCL13, AACS, KHK, MT-ND1, GPI1, ALDH2, AKT2, MPC2, CASP3, NAMPT, PIM1, LONP1, LEPR, SCD1, PRKACA, TIMP4, PDK2, YWHAG, FADS1, SREBF1, GPX4, ACSL1, VPS13C, PDE4D, PRKCE, MUP3, HADHB, HADHA, RBP4, PKM, CRY2, G6PDX, ALDOA, S100A9, S100A8, PTGES, GRAMD1B, PRKAA2, WBP2, INSIG1, PTGER3, ATP1A3, KCNA5, GLRX, ATP5O, ACACA, PRDX3, PRDX1, UCP3, PMVK, CTNNA1, A…	514	2103	20051	1.55816	0.199006	0.00113192	0.00107078
	GOTERM_BP_FAT	GO:0032870~cellular response to hormone stimulus	34	6.12613	4.20258e-05	SLC27A1, PRKAA2, RNF14, WBP2, INSIG1, PCSK9, ATP1A3, GPT, SLC2A4, ACACA, AKT2, UCP3, LEPR, LONP1, ZBTB7B, PRKACA, PPARGC1A, YWHAG, PDK2, SH2B2, ESRRA, SREBF1, ACSL1, PRKCE, ADRM1, MYO5A, FBXO32, PRLR, SORL1, PKM, KLF9, CRY2, ADTRP, GCLM	514	606	20051	2.18866	0.207577	0.00118077	0.00111699
	GOTERM_BP_FAT	GO:0006869~lipid transport	27	4.86486	4.31837e-05	GRAMD1B, SLC27A1, ABCD3, ATP8A1, SLC43A3, PCSK9, TSKU, ACAT2, AKT2, LIPG, APOD, SLC25A20, PRELID3B, PLA2G12A, STARD5, DGAT1, ACSL1, IGFBP3, STARD10, APOC3, ACSL3, RBP4, LPCAT3, CRY2, ATG2A, PLIN2, PTGES	514	426	20051	2.47245	0.21264	0.00120718	0.00114197
	GOTERM_BP_FAT	GO:0046890~regulation of lipid biosynthetic process	18	3.24324	4.61683e-05	SREBF1, ACADVL, SLC27A1, PCX, DGAT1, ELOVL5, INSIG1, APOC3, FITM2, ACSL3, MUP3, BSCL2, MLXIPL, ACADL, LPCAT3, ORMDL3, THRSP, PPARGC1A	514	217	20051	3.23583	0.225543	0.00128413	0.00121476
	GOTERM_BP_FAT	GO:1901652~response to peptide	32	5.76577	5.10084e-05	SLC27A1, INSIG1, PCSK9, ATP1A3, GPT, SLC2A4, KHK, AKT2, UCP3, NAMPT, LONP1, CYC1, ZBTB7B, TIMP4, YWHAG, FADS1, PDK2, SH2B2, ESRRA, SREBF1, VPS13C, ADRM1, SERPINA3K, APOC3, MYO5A, SORL1, CYP51, HADHA, RBP4, PKM, CRY2, MT-CYTB	514	559	20051	2.23311	0.24602	0.00139893	0.00132336
	GOTERM_BP_FAT	GO:0006735~NADH regeneration	6	1.08108	5.15593e-05	GPI1, PKM, PGK1, ENO1, ALDOA, PFKM	514	17	20051	13.7681	0.248316	0.00139893	0.00132336
	GOTERM_BP_FAT	GO:0061621~canonical glycolysis	6	1.08108	5.15593e-05	GPI1, PKM, PGK1, ENO1, ALDOA, PFKM	514	17	20051	13.7681	0.248316	0.00139893	0.00132336
	GOTERM_BP_FAT	GO:0061718~glucose catabolic process to pyruvate	6	1.08108	5.15593e-05	GPI1, PKM, PGK1, ENO1, ALDOA, PFKM	514	17	20051	13.7681	0.248316	0.00139893	0.00132336
	GOTERM_BP_FAT	GO:0035336~long-chain fatty-acyl-CoA metabolic process	6	1.08108	5.15593e-05	DGAT1, ELOVL5, ACSL1, ELOVL3, ELOVL6, ACSL3	514	17	20051	13.7681	0.248316	0.00139893	0.00132336
	GOTERM_BP_FAT	GO:0046486~glycerolipid metabolic process	25	4.5045	5.55437e-05	VAC14, SLC27A1, DAGLA, INSIG1, PCSK9, FITM2, ABHD5, AGPAT2, PIP4P1, ACP6, LIPG, SCD1, SREBF1, PCYT2, DGAT1, ACSL1, DDHD2, APOC3, ACSL3, SORL1, HADHA, LPCAT3, PGP, THRSP, CHPT1	514	383	20051	2.54633	0.264716	0.00149968	0.00141867
	GOTERM_BP_FAT	GO:0051235~maintenance of location	23	4.14414	6.21943e-05	DGAT1, PRKCE, VPS13C, PDE4D, INSIG1, CHD7, CIDEA, CHCHD10, MYO5A, FITM2, ABHD5, ACACB, SORL1, MUP3, LETM1, BSCL2, PINK1, TMEM135, CRY2, LCN2, PLIN2, DRD1, TMEM38B	514	337	20051	2.66238	0.291297	0.0016711	0.00158082
	GOTERM_BP_FAT	GO:0010565~regulation of cellular ketone metabolic process	15	2.7027	7.00683e-05	SREBF1, ACADVL, DGAT1, ELOVL5, PRKCE, INSIG1, APOC3, FMO1, ACACB, MLXIPL, ACADL, AKT2, PPARGC1A, PDK2, PDK1	514	161	20051	3.63445	0.321528	0.00187356	0.00177235
	GOTERM_BP_FAT	GO:0043467~regulation of generation of precursor metabolites and energy	14	2.52252	8.02221e-05	MTCH2, PRKAA2, ENTPD5, PGAM1, CISD1, APOC3, KHK, MLXIPL, PINK1, AKT2, CYCS, NUPR1, PRKACA, PPARGC1A	514	143	20051	3.81913	0.358616	0.00213476	0.00201944
	GOTERM_BP_FAT	GO:0010906~regulation of glucose metabolic process	14	2.52252	8.61671e-05	IGFBP3, RORC, RORA, GPT, ACACB, KHK, MUP3, BCKDK, AKT2, PGP, LEPR, ACADM, PDK2, PDK1	514	144	20051	3.79261	0.379383	0.00228198	0.00215871
	GOTERM_BP_FAT	GO:0009063~cellular amino acid catabolic process	12	2.16216	0.000110681	ALDH4A1, ACAD8, BCKDHA, BCKDK, DLST, GPT, PRODH, HSD17B10, DLD, SLC25A44, DDO, BCAT2	514	109	20051	4.29465	0.458148	0.00291723	0.00275964
	GOTERM_BP_FAT	GO:0006123~mitochondrial electron transport, cytochrome c to oxygen	6	1.08108	0.000121229	COX8B, MT-CO1, COX4I1, CYCS, COX6A1, COX5A	514	20	20051	11.7029	0.488888	0.00318011	0.00300832
	GOTERM_BP_FAT	GO:0006140~regulation of nucleotide metabolic process	15	2.7027	0.000125686	MTCH2, PRKAA2, ENTPD5, PGAM1, APOC3, ENO1, HSD11B1, MLXIPL, PINK1, STIM1, ME1, DRD1, ME2, NUPR1, PPARGC1A	514	170	20051	3.44203	0.501344	0.00328146	0.0031042
	GOTERM_BP_FAT	GO:0008654~phospholipid biosynthetic process	16	2.88288	0.000131586	IDI1, VAC14, SLC27A1, PCYT2, PCX, FITM2, ABHD5, ACSL3, AGPAT2, BSCL2, LPCAT3, ORMDL3, PMVK, CHPT1, MVD, TMEM38B	514	192	20051	3.25081	0.517372	0.00341938	0.00323467
	GOTERM_BP_FAT	GO:0006739~NADP metabolic process	8	1.44144	0.000134586	HSD11B1, PGAM1, G6PDX, FMO1, TALDO1, PGLS, PGD, TKT	514	45	20051	6.93506	0.525323	0.00348101	0.00329296
	GOTERM_BP_FAT	GO:0006644~phospholipid metabolic process	25	4.5045	0.000137209	IDI1, VAC14, SLC27A1, PCX, GDE1, PCSK9, FITM2, ABHD5, AGPAT2, PIP4P1, ACP6, ORMDL3, PMVK, TMEM38B, FDFT1, PLA2G12A, PCYT2, ACSL3, BSCL2, HADHA, LPCAT3, ASPG, PGP, MVD, CHPT1	514	406	20051	2.40208	0.532165	0.00353233	0.00334151
	GOTERM_BP_FAT	GO:0046365~monosaccharide catabolic process	8	1.44144	0.000155282	GPI1, GALE, PKM, PGK1, ENO1, ALDOA, PFKM, KHK	514	46	20051	6.7843	0.576714	0.00391936	0.00370764
	GOTERM_BP_FAT	GO:0097031~mitochondrial respiratory chain complex I biogenesis	9	1.62162	0.000155565	NDUFA9, NDUFB9, NDUFA6, NDUFS8, NDUFB5, NDUFA10, NDUFS2, NDUFS1, MT-ND1	514	61	20051	5.75553	0.577376	0.00391936	0.00370764
	GOTERM_BP_FAT	GO:0010257~NADH dehydrogenase complex assembly	9	1.62162	0.000155565	NDUFA9, NDUFB9, NDUFA6, NDUFS8, NDUFB5, NDUFA10, NDUFS2, NDUFS1, MT-ND1	514	61	20051	5.75553	0.577376	0.00391936	0.00370764
	GOTERM_BP_FAT	GO:0032981~mitochondrial respiratory chain complex I assembly	9	1.62162	0.000155565	NDUFA9, NDUFB9, NDUFA6, NDUFS8, NDUFB5, NDUFA10, NDUFS2, NDUFS1, MT-ND1	514	61	20051	5.75553	0.577376	0.00391936	0.00370764
	GOTERM_BP_FAT	GO:0019682~glyceraldehyde-3-phosphate metabolic process	6	1.08108	0.000155783	G6PDX, TALDO1, PGLS, PGD, TKT, KHK	514	21	20051	11.1456	0.577887	0.00391936	0.00370764
	GOTERM_BP_FAT	GO:0006107~oxaloacetate metabolic process	5	0.900901	0.000178025	CS, ACLY, PCX, MDH1, MDH2	514	12	20051	16.2541	0.626797	0.00445867	0.00421782
	GOTERM_BP_FAT	GO:0007623~circadian rhythm	17	3.06306	0.000247802	NDUFA9, SREBF1, NTRK3, PTGER3, BHLHE41, RORC, HUWE1, RORA, MUP3, DPYD, NAMPT, KLF9, CRY2, BHLHE40, LEPR, DRD1, PPARGC1A	514	226	20051	2.93436	0.746401	0.0061783	0.00584454
	GOTERM_BP_FAT	GO:0009894~regulation of catabolic process	41	7.38739	0.000254023	MTCH2, PRKAA2, RNF14, PCSK9, ABHD5, ACACB, TOB1, HSD11B1, AKT2, CASP3, NAMPT, PSMD3, ORMDL3, LEPR, ZKSCAN3, PACSIN3, PRKACA, PPARGC1A, RILP, TIMP4, SREBF1, PRKCE, IGFBP3, ENTPD5, VPS13C, PGAM1, CIDEA, HUWE1, APOC3, SORL1, CYP51, RGMA, HIPK2, BSCL2, RNF144B, MLXIPL, PINK1, HECW2, ATG2A, VDAC1, NUPR1	514	868	20051	1.84263	0.754989	0.00630501	0.00596442
	GOTERM_BP_FAT	GO:0044275~cellular carbohydrate catabolic process	8	1.44144	0.000265345	HSD11B1, AGL, PGAM1, GPD2, PYGL, PGD, PFKM, PGM1	514	50	20051	6.24156	0.769877	0.00655662	0.00620243
	GOTERM_BP_FAT	GO:0045444~fat cell differentiation	18	3.24324	0.000298622	TMEM120B, SREBF1, INSIG1, RORA, ARXES2, SLC2A4, SOD2, TLCD3B, AACS, BSCL2, NUDT7, LNCBATE1, ZADH2, PIM1, SCD1, ZBTB7B, RETREG1, SH2B2	514	253	20051	2.7754	0.808605	0.0073461	0.00694927
	GOTERM_BP_FAT	GO:0014070~response to organic cyclic compound	52	9.36937	0.000301826	ABCD3, RNF14, RORC, CIB2, RORA, AACS, GPI1, RBM3, ALDH2, AKT2, CASP3, NAMPT, PIM1, TMEM38B, FADS1, SREBF1, GPX4, ACSL1, PDE4D, PRKCE, ACSL3, MUP3, DPYD, CRY2, PLIN2, ADTRP, ALDOA, PTGES, GRAMD1B, IDI1, PRKAA2, WBP2, INSIG1, PTGER3, GLRX, ATP5O, ACACB, ACACA, SULT1A1, UCP3, PMVK, CTNNA1, DRD1, PPARGC1A, ESRRA, NTRK3, AGL, CIDEA, FBXO32, KLF9, CYP1A1, GCLM	514	1206	20051	1.68201	0.811972	0.00739207	0.00699275
	GOTERM_BP_FAT	GO:0006007~glucose catabolic process	6	1.08108	0.00030541	GPI1, PKM, PGK1, ENO1, ALDOA, PFKM	514	24	20051	9.75243	0.815666	0.00744689	0.00704461
	GOTERM_BP_FAT	GO:0030497~fatty acid elongation	5	0.900901	0.000345631	PECR, ELOVL5, TECR, ELOVL3, ELOVL6	514	14	20051	13.932	0.852473	0.00839065	0.00793738
	GOTERM_BP_FAT	GO:0019915~lipid storage	10	1.8018	0.000350976	BSCL2, TMEM135, DGAT1, CRY2, CIDEA, PLIN2, FITM2, ABHD5, ACACB, MUP3	514	86	20051	4.53601	0.856776	0.00848319	0.00802493
	GOTERM_BP_FAT	GO:0090207~regulation of triglyceride metabolic process	8	1.44144	0.000430862	SREBF1, SLC27A1, DGAT1, APOC3, FITM2, THRSP, ABHD5, SORL1	514	54	20051	5.77922	0.907982	0.010346	0.00978709
	GOTERM_BP_FAT	GO:0061024~membrane organization	51	9.18919	0.000432091	SNAP25, IGHV1-82, MTCH2, ATP8A1, IGHG3, IGHG1, CHCHD3, CNST, SGCA, AKT2, IGHV5-9, IGLC1, IGHV3-6, SGCG, IGHV1-50, MIGA2, IGHV1-52, MMGT1, IGHV1-11, PPP2R5A, ACSL3, SHISA6, IGHV11-2, AFG3L2, IGHG2C, RILPL2, IGHA, TLCD1, S100A9, MTFP1, INSIG1, IGHV1-22, IGHV1-26, APOO, SAMM50, PACSIN3, EMC6, RILP, SEC31B, DMPK, KCNB1, HUWE1, CHCHD10, IMMT, MYO5A, DHCR24, LETM1, PINK1, DLG2, LPCAT3, SPIRE1	514	1194	20051	1.66624	0.908606	0.010346	0.00978709
	GOTERM_BP_FAT	GO:0005978~glycogen biosynthetic process	7	1.26126	0.000433652	GYS1, UGP2, GYG, AKT2, AGL, GBE1, ACADM	514	39	20051	7.00175	0.909393	0.010346	0.00978709
	GOTERM_BP_FAT	GO:0010866~regulation of triglyceride biosynthetic process	6	1.08108	0.000453134	SREBF1, SLC27A1, DGAT1, APOC3, FITM2, THRSP	514	26	20051	9.00224	0.91866	0.0107644	0.0101829
	GOTERM_BP_FAT	GO:0006720~isoprenoid metabolic process	11	1.98198	0.000487913	IDI1, PECR, RBP4, CYP2D22, DGAT1, RDH11, PMVK, CYP1A1, MVD, LSS, FDFT1	514	109	20051	3.93676	0.932912	0.011541	0.0109176
	GOTERM_BP_FAT	GO:0006520~cellular amino acid metabolic process	19	3.42342	0.00049757	ACAD8, BCKDHA, EGLN3, DLST, GPT, HSD17B10, DDO, ALDH4A1, BCKDK, CYP2D22, TST, DPYD, ASPG, GCLM, PRODH, SEPHS2, DLD, SLC25A44, BCAT2	514	289	20051	2.56465	0.936406	0.0117194	0.0110863
	GOTERM_BP_FAT	GO:0006636~unsaturated fatty acid biosynthetic process	9	1.62162	0.000543503	FADS2, ELOVL5, PTGES2, ELOVL3, MGST2, ELOVL6, SCD1, FADS1, PTGES	514	73	20051	4.80942	0.950691	0.012717	0.0120301
	GOTERM_BP_FAT	GO:0051156~glucose 6-phosphate metabolic process	6	1.08108	0.000544524	GPI1, G6PDX, TALDO1, PGLS, PGD, TKT	514	27	20051	8.66883	0.950969	0.012717	0.0120301
	GOTERM_BP_FAT	GO:0019725~cellular homeostasis	45	8.10811	0.000549163	COX19, PRKAA2, CHD7, PTGER3, ATP1A3, CIB2, KCNA5, FITM2, LPAR3, CXCL13, AACS, PRDX3, ATP5B, PRDX1, MPC2, ORMDL3, LEPR, DRD1, TMEM38B, PRKACA, PPARGC1A, ATP6V1G1, GLRX3, DMPK, KCNB1, PRKCE, PDE4D, NCOA4, IMMT, RMDN3, APOC3, MYO5A, ATOX1, MUP3, LETM1, SLC9A2, AFG3L2, MLXIPL, STIM1, LCN2, ACO1, ALDOA, GCLM, DLD, PFKM	514	1023	20051	1.71597	0.952213	0.0127715	0.0120816
	GOTERM_BP_FAT	GO:0043523~regulation of neuron apoptotic process	19	3.42342	0.000561778	EGLN3, KCNB1, GBE1, PCSK9, SOD2, HIPK2, PRDX3, GPI1, PINK1, CDC34, SIX4, CASP3, G6PDX, BAG1, LCN2, NUPR1, GCLM, PPARGC1A, RETREG1	514	292	20051	2.5383	0.955438	0.0130102	0.0123074
	GOTERM_BP_FAT	GO:0042593~glucose homeostasis	20	3.6036	0.000630731	PRKAA2, KCNB1, APOC3, PYGL, SLC2A4, AACS, MUP3, GPI1, MLXIPL, GPRC5B, RBP4, MPC2, CRY2, LEPR, GCLM, PRKACA, PPARGC1A, PFKM, PDK2, SH2B2	514	320	20051	2.43811	0.969585	0.0145462	0.0137605
	GOTERM_BP_FAT	GO:0033500~carbohydrate homeostasis	20	3.6036	0.000647366	PRKAA2, KCNB1, APOC3, PYGL, SLC2A4, AACS, MUP3, GPI1, MLXIPL, GPRC5B, RBP4, MPC2, CRY2, LEPR, GCLM, PRKACA, PPARGC1A, PFKM, PDK2, SH2B2	514	321	20051	2.43051	0.972263	0.0148679	0.0140648
	GOTERM_BP_FAT	GO:0001659~temperature homeostasis	8	1.44144	0.000670009	SLC27A1, ACADVL, ACADL, PTGER3, CIDEA, DRD1, MUP3, PTGES	514	58	20051	5.38065	0.975533	0.0153244	0.0144966
	GOTERM_BP_FAT	GO:0006098~pentose-phosphate shunt	5	0.900901	0.000773159	G6PDX, TALDO1, PGLS, PGD, TKT	514	17	20051	11.4734	0.986183	0.0176108	0.0166595
	GOTERM_BP_FAT	GO:0009719~response to endogenous stimulus	72	12.973	0.000783225	KLB, SLC27A1, RNF14, PCSK9, CIB2, GPT, SLC2A4, CXCL13, AACS, TSKU, KHK, GPI1, AKT2, CASP3, NAMPT, ME1, LONP1, LEPR, UQCRFS1, PMEPA1, PRKACA, TMEM38B, TIMP4, PDK2, YWHAG, FADS1, SREBF1, ACSL1, VPS13C, PDE4D, PRKCE, NCOA4, PRLR, RGMA, HADHA, RBP4, PKM, CRY2, UQCRC1, ADTRP, ALDOA, PRKAA2, WBP2, INSIG1, ATP1A3, ATP5O, TOB1, ACACA, SULT1A1, UCP3, CTNNA1, CYC1, DRD1, ZBTB7B, PPARGC1A, SH2B2, ESRRA, NTR…	514	1903	20051	1.47593	0.986933	0.017767	0.0168072
	GOTERM_BP_FAT	GO:0010243~response to organonitrogen compound	47	8.46847	0.000812744	SLC27A1, PRKAA2, INSIG1, PCSK9, ATP1A3, CIB2, GPT, SLC2A4, ATP5O, AACS, KHK, GPI1, AKT2, CASP3, UCP3, NAMPT, LONP1, CTNNA1, CYC1, DRD1, ZBTB7B, TMEM38B, PPARGC1A, TIMP4, YWHAG, FADS1, PDK2, SH2B2, ESRRA, SREBF1, PRKCE, VPS13C, PDE4D, ADRM1, SERPINA3K, APOC3, MYO5A, SORL1, CYP51, HADHA, RBP4, PKM, CRY2, UQCRC1, MT-CYTB, ALDOA, GCLM	514	1105	20051	1.65924	0.988904	0.0183614	0.0173695
	GOTERM_BP_FAT	GO:0046320~regulation of fatty acid oxidation	7	1.26126	0.000842346	ACADVL, ACADL, DGAT1, AKT2, FMO1, ACACB, PPARGC1A	514	44	20051	6.20609	0.990583	0.0189528	0.0179289
	GOTERM_BP_FAT	GO:0032869~cellular response to insulin stimulus	16	2.88288	0.000859745	ESRRA, SREBF1, SLC27A1, INSIG1, PCSK9, MYO5A, GPT, SLC2A4, SORL1, PKM, AKT2, LONP1, ZBTB7B, YWHAG, PDK2, SH2B2	514	229	20051	2.72557	0.991448	0.0192659	0.0182252
	GOTERM_BP_FAT	GO:0015711~organic anion transport	26	4.68468	0.000956612	SLC25A1, SLC27A1, ABCD3, ATP8A1, PTGER3, SLC25A48, MPC1, AKT2, MPC2, SLC25A44, SLC25A22, PRELID3B, PLA2G12A, SLC36A2, ACSL1, STARD10, APOC3, ACSL3, SLC6A6, RBP4, SLC6A9, SLC25A19, PLIN2, SFXN1, SLC25A10, PTGES	514	492	20051	2.06149	0.995	0.0213502	0.0201969
	GOTERM_BP_FAT	GO:0006103~2-oxoglutarate metabolic process	5	0.900901	0.000974092	IDH3G, OGDH, IDH3B, DLST, DLD	514	18	20051	10.836	0.995462	0.0215664	0.0204014
	GOTERM_BP_FAT	GO:0006991~response to sterol depletion	5	0.900901	0.000974092	SREBF1, PIP4P1, LPCAT3, INSIG1, ZBTB7B	514	18	20051	10.836	0.995462	0.0215664	0.0204014
	GOTERM_BP_FAT	GO:0000266~mitochondrial fission	7	1.26126	0.00107062	MTCH2, PINK1, MTFP1, DDHD2, SPIRE1, MTFR1L, PPARGC1A	514	46	20051	5.93626	0.997342	0.0235155	0.0222452
	GOTERM_BP_FAT	GO:0009250~glucan biosynthetic process	7	1.26126	0.00107062	GYS1, UGP2, GYG, AKT2, AGL, GBE1, ACADM	514	46	20051	5.93626	0.997342	0.0235155	0.0222452
	GOTERM_BP_FAT	GO:0031329~regulation of cellular catabolic process	33	5.94595	0.00112789	PRKAA2, RNF14, PCSK9, ABHD5, ACACB, TOB1, HSD11B1, AKT2, CASP3, NAMPT, ORMDL3, LEPR, ZKSCAN3, PACSIN3, PRKACA, TIMP4, SREBF1, IGFBP3, ENTPD5, VPS13C, PGAM1, CIDEA, HUWE1, APOC3, SORL1, RGMA, HIPK2, RNF144B, MLXIPL, PINK1, ATG2A, VDAC1, NUPR1	514	698	20051	1.8443	0.998065	0.0246753	0.0233423
	GOTERM_BP_FAT	GO:1905954~positive regulation of lipid localization	11	1.98198	0.00117547	TMEM135, ATP8A1, ACSL1, LPCAT3, LIPG, CIDEA, PLIN2, FITM2, ACACB, ACAT2, PTGES	514	122	20051	3.51727	0.998513	0.025615	0.0242313
	GOTERM_BP_FAT	GO:0043470~regulation of carbohydrate catabolic process	8	1.44144	0.00121379	HSD11B1, MLXIPL, MTCH2, PRKAA2, ENTPD5, PGAM1, NUPR1, PPARGC1A	514	64	20051	4.87622	0.998798	0.0263464	0.0249232
	GOTERM_BP_FAT	GO:1901605~alpha-amino acid metabolic process	15	2.7027	0.00122312	ACAD8, EGLN3, DLST, GPT, HSD17B10, DDO, ALDH4A1, BCKDK, CYP2D22, TST, ASPG, GCLM, PRODH, SEPHS2, BCAT2	514	213	20051	2.74716	0.998858	0.0264453	0.0250167
	GOTERM_BP_FAT	GO:0006108~malate metabolic process	4	0.720721	0.00124655	MDH1, MDH2, ME1, ME2	514	9	20051	17.3377	0.998997	0.0268468	0.0253966
	GOTERM_BP_FAT	GO:0034284~response to monosaccharide	17	3.06306	0.00128808	NDUFA9, SREBF1, PRKAA2, KCNB1, APOC3, SOD2, AACS, KHK, MUP3, MLXIPL, CASP3, MPC2, NAMPT, LEPR, GCLM, PRKACA, PPARGC1A	514	263	20051	2.52154	0.999204	0.0276337	0.026141
	GOTERM_BP_FAT	GO:0046942~carboxylic acid transport	21	3.78378	0.001318	SLC25A1, PLA2G12A, SLC27A1, SLC36A2, ABCD3, ACSL1, STARD10, ACSL3, SLC25A48, SLC6A6, RBP4, SLC6A9, MPC1, AKT2, MPC2, PLIN2, SFXN1, SLC25A10, SLC25A22, SLC25A44, PTGES	514	367	20051	2.23216	0.999325	0.0280902	0.0265727
	GOTERM_BP_FAT	GO:0007584~response to nutrient	14	2.52252	0.0013195	ACSL1, AGL, COX4I1, ACSL3, SOD2, AACS, UCP3, DPYD, LIPG, CYP1A1, PIM1, GCLM, FADS1, PDK2	514	191	20051	2.85935	0.999331	0.0280902	0.0265727
	GOTERM_BP_FAT	GO:0042304~regulation of fatty acid biosynthetic process	7	1.26126	0.00134358	SREBF1, MLXIPL, ACADVL, ACADL, ELOVL5, INSIG1, APOC3	514	48	20051	5.68892	0.999415	0.0284931	0.0269539
	GOTERM_BP_FAT	GO:0034637~cellular carbohydrate biosynthetic process	9	1.62162	0.00138082	GYS1, UGP2, GYG, AKT2, AGL, GBE1, B3GALT1, PGP, ACADM	514	84	20051	4.17961	0.999524	0.0291711	0.0275953
	GOTERM_BP_FAT	GO:0015849~organic acid transport	21	3.78378	0.00145029	SLC25A1, PLA2G12A, SLC27A1, SLC36A2, ABCD3, ACSL1, STARD10, ACSL3, SLC25A48, SLC6A6, RBP4, SLC6A9, MPC1, AKT2, MPC2, PLIN2, SFXN1, SLC25A10, SLC25A22, SLC25A44, PTGES	514	370	20051	2.21407	0.999676	0.0305222	0.0288734
	GOTERM_BP_FAT	GO:0010883~regulation of lipid storage	8	1.44144	0.00145655	SREBF1, TMEM135, CIDEA, PLIN2, FITM2, ABHD5, ACACB, MUP3	514	66	20051	4.72845	0.999687	0.0305378	0.0288882
	GOTERM_BP_FAT	GO:1903578~regulation of ATP metabolic process	10	1.8018	0.00149755	MLXIPL, MTCH2, PINK1, PRKAA2, ENTPD5, PGAM1, APOC3, NUPR1, ENO1, PPARGC1A	514	105	20051	3.71521	0.999751	0.031279	0.0295894
	GOTERM_BP_FAT	GO:0070997~neuron death	24	4.32432	0.00151628	EGLN3, KCNB1, GBE1, PCSK9, SOD2, SORL1, HIPK2, PRDX3, GPI1, PINK1, CDC34, SIX4, AKT2, PSMC1, CASP3, G6PDX, BAG1, NAMPT, TBC1D24, LCN2, NUPR1, GCLM, PPARGC1A, RETREG1	514	453	20051	2.06674	0.999775	0.0315512	0.0298468
	GOTERM_BP_FAT	GO:0055082~cellular chemical homeostasis	40	7.20721	0.00158517	COX19, PRKAA2, CHD7, PTGER3, ATP1A3, CIB2, KCNA5, FITM2, LPAR3, CXCL13, AACS, ATP5B, MPC2, ORMDL3, LEPR, DRD1, TMEM38B, PRKACA, PPARGC1A, ATP6V1G1, GLRX3, DMPK, KCNB1, PRKCE, PDE4D, NCOA4, IMMT, RMDN3, APOC3, MYO5A, ATOX1, MUP3, LETM1, SLC9A2, AFG3L2, MLXIPL, STIM1, LCN2, ACO1, GCLM	514	924	20051	1.68873	0.999847	0.0328611	0.031086
	GOTERM_BP_FAT	GO:0009743~response to carbohydrate	18	3.24324	0.00159533	NDUFA9, SREBF1, PRKAA2, KCNB1, APOC3, SOD2, AACS, KHK, MUP3, MLXIPL, CASP3, MPC2, NAMPT, LEPR, GCLM, PRKACA, PPARGC1A, FADS1	514	294	20051	2.38835	0.999855	0.0329484	0.0311685
	GOTERM_BP_FAT	GO:0035338~long-chain fatty-acyl-CoA biosynthetic process	4	0.720721	0.00174706	ELOVL5, ACSL1, ELOVL3, ELOVL6	514	10	20051	15.6039	0.999937	0.0358148	0.0338801
	GOTERM_BP_FAT	GO:1902031~regulation of NADP metabolic process	4	0.720721	0.00174706	HSD11B1, PGAM1, ME1, ME2	514	10	20051	15.6039	0.999937	0.0358148	0.0338801
	GOTERM_BP_FAT	GO:0015850~organic hydroxy compound transport	18	3.24324	0.00184955	GRAMD1B, ABCD3, STARD5, KCNB1, IGFBP3, STARD10, PTGER3, APOC3, PCSK9, MYO5A, TSKU, ACAT2, RBP4, PINK1, LPCAT3, LIPG, DRD1, NAT8L	514	298	20051	2.35629	0.999965	0.0376642	0.0356296
	GOTERM_BP_FAT	GO:0045922~negative regulation of fatty acid metabolic process	6	1.08108	0.00185089	ACADVL, ACADL, INSIG1, FMO1, APOC3, ACACB	514	35	20051	6.68738	0.999965	0.0376642	0.0356296
	GOTERM_BP_FAT	GO:0019254~carnitine metabolic process, CoA-linked	3	0.540541	0.00192671	ACADL, ACADM, CRAT	514	3	20051	39.0097	0.999977	0.0390634	0.0369532
	GOTERM_BP_FAT	GO:1901214~regulation of neuron death	22	3.96396	0.00193942	EGLN3, KCNB1, GBE1, PCSK9, SOD2, SORL1, HIPK2, PRDX3, GPI1, PINK1, CDC34, SIX4, PSMC1, CASP3, G6PDX, BAG1, TBC1D24, LCN2, NUPR1, GCLM, PPARGC1A, RETREG1	514	407	20051	2.10863	0.999978	0.0391777	0.0370614
	GOTERM_BP_FAT	GO:0045834~positive regulation of lipid metabolic process	14	2.52252	0.00199079	SREBF1, SLC27A1, PCX, DGAT1, ELOVL5, PRKCE, APOC3, ABHD5, ACSL3, MUP3, MLXIPL, AKT2, SCD1, PPARGC1A	514	200	20051	2.73068	0.999984	0.0400691	0.0379046
	GOTERM_BP_FAT	GO:0051881~regulation of mitochondrial membrane potential	9	1.62162	0.0020026	PRDX3, TMEM135, MTCH2, PINK1, PRKCE, AKT2, NDUFS1, SOD2, GCLM	514	89	20051	3.9448	0.999985	0.0401609	0.0379914
	GOTERM_BP_FAT	GO:1903580~positive regulation of ATP metabolic process	7	1.26126	0.00204555	MLXIPL, PINK1, PRKAA2, ENTPD5, NUPR1, ENO1, PPARGC1A	514	52	20051	5.25131	0.999988	0.0408741	0.0386661
	GOTERM_BP_FAT	GO:0033692~cellular polysaccharide biosynthetic process	8	1.44144	0.00205446	GYS1, UGP2, GYG, AKT2, AGL, GBE1, B3GALT1, ACADM	514	70	20051	4.45825	0.999989	0.0409045	0.0386948
	GOTERM_BP_FAT	GO:0007031~peroxisome organization	6	1.08108	0.00210486	PEX16, TMEM135, PEX19, ABCD3, PEX3, PEX14	514	36	20051	6.50162	0.999991	0.0417578	0.039502
	GOTERM_BP_FAT	GO:0032368~regulation of lipid transport	12	2.16216	0.00218599	DGAT1, ATP8A1, ACSL1, AKT2, LPCAT3, IGFBP3, CRY2, LIPG, APOC3, PCSK9, ACAT2, PTGES	514	155	20051	3.02011	0.999995	0.0432123	0.040878
	GOTERM_BP_FAT	GO:0044743~protein transmembrane import into intracellular organelle	7	1.26126	0.00225775	PEX16, PEX19, SAMM50, GRPEL1, PEX3, TIMM23, PEX14	514	53	20051	5.15223	0.999996	0.0443143	0.0419205
	GOTERM_BP_FAT	GO:0006110~regulation of glycolytic process	7	1.26126	0.00225775	MLXIPL, MTCH2, PRKAA2, ENTPD5, PGAM1, NUPR1, PPARGC1A	514	53	20051	5.15223	0.999996	0.0443143	0.0419205
	GOTERM_BP_FAT	GO:0045981~positive regulation of nucleotide metabolic process	9	1.62162	0.00230561	MLXIPL, PINK1, PRKAA2, STIM1, ENTPD5, DRD1, NUPR1, ENO1, PPARGC1A	514	91	20051	3.8581	0.999997	0.0449349	0.0425076
	GOTERM_BP_FAT	GO:1900544~positive regulation of purine nucleotide metabolic process	9	1.62162	0.00230561	MLXIPL, PINK1, PRKAA2, STIM1, ENTPD5, DRD1, NUPR1, ENO1, PPARGC1A	514	91	20051	3.8581	0.999997	0.0449349	0.0425076
	GOTERM_BP_FAT	GO:0006104~succinyl-CoA metabolic process	4	0.720721	0.00235679	NUDT7, OGDH, DLST, ACOT4	514	11	20051	14.1854	0.999998	0.0454523	0.042997
	GOTERM_BP_FAT	GO:0046949~fatty-acyl-CoA biosynthetic process	4	0.720721	0.00235679	ELOVL5, ACSL1, ELOVL3, ELOVL6	514	11	20051	14.1854	0.999998	0.0454523	0.042997
	GOTERM_BP_FAT	GO:0098779~positive regulation of macromitophagy in response to mitochondrial depolarization	4	0.720721	0.00235679	PINK1, VPS13C, HUWE1, VDAC1	514	11	20051	14.1854	0.999998	0.0454523	0.042997
	GOTERM_BP_FAT	GO:0008299~isoprenoid biosynthetic process	6	1.08108	0.00238333	IDI1, PMVK, CYP1A1, MVD, LSS, FDFT1	514	37	20051	6.3259	0.999998	0.0458047	0.0433303
	GOTERM_BP_FAT	GO:0009746~response to hexose	16	2.88288	0.00239318	NDUFA9, SREBF1, PRKAA2, KCNB1, APOC3, AACS, KHK, MUP3, MLXIPL, CASP3, MPC2, NAMPT, LEPR, GCLM, PRKACA, PPARGC1A	514	254	20051	2.45731	0.999998	0.0458124	0.0433376
	GOTERM_BP_FAT	GO:0048511~rhythmic process	22	3.96396	0.00241137	NDUFA9, SREBF1, PRKAA2, NTRK3, PTGER3, ADRM1, BHLHE41, RORC, HUWE1, RORA, MUP3, CASP3, DPYD, NAMPT, KLF9, CRY2, BHLHE40, CTNNA1, LEPR, DRD1, PPARGC1A, TIMP4	514	414	20051	2.07298	0.999998	0.0458124	0.0433376
	GOTERM_BP_FAT	GO:0032922~circadian regulation of gene expression	8	1.44144	0.00241684	NAMPT, CRY2, BHLHE40, HUWE1, BHLHE41, RORC, RORA, PPARGC1A	514	72	20051	4.33441	0.999998	0.0458124	0.0433376
	GOTERM_BP_FAT	GO:0034308~primary alcohol metabolic process	8	1.44144	0.00241684	PECR, ALDH3B2, RBP4, CYP2D22, ALDH2, RDH11, GDE1, CYP1A1	514	72	20051	4.33441	0.999998	0.0458124	0.0433376
	GOTERM_BP_FAT	GO:0071453~cellular response to oxygen levels	14	2.52252	0.00247548	RWDD3, ATP6V1G1, EGLN3, PRKCE, RORA, SDHD, ENO1, SLC2A4, PINK1, NAMPT, PGK1, NDUFS2, PPARGC1A, PDK1	514	205	20051	2.66408	0.999999	0.0467637	0.0442376
	GOTERM_BP_FAT	GO:0000272~polysaccharide catabolic process	5	0.900901	0.00254753	AGL, CHIL3, PYGL, PFKM, PGM1	514	23	20051	8.48038	0.999999	0.0479612	0.0453704
	GOTERM_BP_FAT	GO:0006910~phagocytosis, recognition	14	2.52252	0.00257823	IGHV1-82, IGHV1-50, IGHV1-52, IGHV1-11, IGHV1-22, IGHV1-26, IGHG3, IGHV11-2, IGHG2C, IGHG1, IGHA, IGHV5-9, IGLC1, IGHV3-6	514	206	20051	2.65115	0.999999	0.0483746	0.0457614
	GOTERM_BP_FAT	GO:0065002~intracellular protein transmembrane transport	8	1.44144	0.00261553	PEX16, PEX19, SAMM50, GRPEL1, PEX3, AKT2, TIMM23, PEX14	514	73	20051	4.27504	0.999999	0.0489086	0.0462666
	GOTERM_BP_FAT	GO:0007006~mitochondrial membrane organization	10	1.8018	0.00280283	LETM1, AFG3L2, APOO, MTCH2, PINK1, CHCHD3, SAMM50, MTFP1, CHCHD10, IMMT	514	115	20051	3.39215	1	0.0522345	0.0494128
	GOTERM_BP_FAT	GO:0046907~intracellular transport	64	11.5315	0.00291852	SNAP25, MT-ND4L, NDUFA10, PCSK9, ARXES2, DUSP18, MT-ND1, RIMS4, AKT2, MLX, KIF1C, PRKACA, YWHAG, CADPS2, SREBF1, VPS13C, PRKCE, NCOA4, TIMM23, MYRIP, SDHD, SDHA, NDUFS8, RILPL2, PEX3, CRY2, TBC1D24, NDUFS2, NDUFS1, NAPA, GRAMD1B, NDUFB9, NRN1, NDUFB5, INSIG1, ATP5A1, DERL1, TRAK1, ATP5O, TOB1, ATP5L, ATP5B, SAMM50, GRPEL1, MAP6, APOD, DRD1, NDUFV2, NDUFV1, RILP, SEC31B, HSPA9, NDUFA9, PEX16, NDUF…	514	1734	20051	1.43981	1	0.0542081	0.0512798
	GOTERM_BP_FAT	GO:0009895~negative regulation of catabolic process	17	3.06306	0.00298901	MTCH2, CIDEA, APOC3, ACACB, TOB1, SORL1, CYP51, HIPK2, BSCL2, PINK1, NAMPT, ZKSCAN3, LEPR, NUPR1, PPARGC1A, RILP, TIMP4	514	286	20051	2.31876	1	0.0552755	0.0522895
	GOTERM_BP_FAT	GO:0034389~lipid particle organization	5	0.900901	0.00299596	BSCL2, PRKAA2, DDHD2, PLIN2, FITM2	514	24	20051	8.12703	1	0.0552755	0.0522895
	GOTERM_BP_FAT	GO:1901606~alpha-amino acid catabolic process	9	1.62162	0.00301877	ALDH4A1, ACAD8, BCKDK, DLST, GPT, PRODH, HSD17B10, DDO, BCAT2	514	95	20051	3.69566	1	0.0553274	0.0523386
	GOTERM_BP_FAT	GO:0014823~response to activity	9	1.62162	0.00301877	SULT1A1, PRKAA2, MTFP1, UCP3, CRY2, UQCRC1, SOD2, GCLM, PPARGC1A	514	95	20051	3.69566	1	0.0553274	0.0523386
	GOTERM_BP_FAT	GO:0050853~B cell receptor signaling pathway	15	2.7027	0.00303349	IGHV1-82, IGHV1-50, IGHV1-52, IGHV1-11, IGHV1-22, IGHV1-26, IGHG3, IGHV11-2, IGHG2C, IGHG1, IGHA, IGHV5-9, IGLC1, IGHV3-6, SH2B2	514	235	20051	2.48998	1	0.0554137	0.0524202
	GOTERM_BP_FAT	GO:0050994~regulation of lipid catabolic process	8	1.44144	0.00305033	BSCL2, PRKCE, AKT2, CIDEA, APOC3, ABHD5, ACACB, SORL1	514	75	20051	4.16104	1	0.055538	0.0525378
	GOTERM_BP_FAT	GO:0010817~regulation of hormone levels	29	5.22523	0.00318014	SNAP25, DHRS11, CHD7, PTGER3, GLRX, HSD17B12, HSD17B10, DDO, AACS, PCSK4, SULT1A1, HSD11B1, RDH11, MPC2, LEPR, PPARGC1A, SREBF1, DGAT1, KCNB1, PRKCE, MYO5A, MYRIP, MUP3, RBP4, CYP2D22, CRY2, CYP1A1, PFKM, BCAT2	514	626	20051	1.80716	1	0.0577117	0.0545941
	GOTERM_BP_FAT	GO:0042493~response to drug	24	4.32432	0.00323366	OSCP1, SREBF1, ABCD3, PRKAA2, ACSL1, ATP1A3, SOD2, ACACB, AGPAT2, AACS, HADHA, CYP2D22, CASP3, DPYD, LCN2, CYP1A1, UQCRFS1, PLIN2, APOD, DRD1, UQCRC2, GCLM, PPARGC1A, TIMP4	514	481	20051	1.94643	1	0.0584912	0.0553315
	GOTERM_BP_FAT	GO:0050873~brown fat cell differentiation	7	1.26126	0.00327579	NUDT7, LNCBATE1, PIM1, SLC2A4, SCD1, ZBTB7B, SH2B2	514	57	20051	4.79067	1	0.0590603	0.0558699
	GOTERM_BP_FAT	GO:0031667~response to nutrient levels	27	4.86486	0.00328942	PRKAA2, COX4I1, PCSK9, GPT, ACACB, AACS, UCP3, NAMPT, LIPG, PIM1, ACADM, PPARGC1A, FADS1, PDK2, CADPS2, SREBF1, ACSL1, KCNB1, AGL, ACSL3, SOD2, SORL1, TMEM135, DPYD, CYP1A1, PLIN2, GCLM	514	569	20051	1.85108	1	0.0591134	0.0559201
	GOTERM_BP_FAT	GO:0097164~ammonium ion metabolic process	14	2.52252	0.00330252	SLC27A1, GDE1, MYO5A, ACSL3, CYP2D22, ACADL, ALDH2, LPCAT3, CHDH, ORMDL3, CHPT1, ACADM, CRAT, PAOX	514	212	20051	2.57611	1	0.0591568	0.0559612
	GOTERM_BP_FAT	GO:0051402~neuron apoptotic process	18	3.24324	0.00335875	KCNB1, GBE1, PCSK9, SOD2, HIPK2, PRDX3, GPI1, PINK1, CDC34, SIX4, AKT2, CASP3, BAG1, LCN2, NUPR1, GCLM, PPARGC1A, RETREG1	514	316	20051	2.22207	1	0.05997	0.0567304
	GOTERM_BP_FAT	GO:0009896~positive regulation of catabolic process	24	4.32432	0.00337184	PRKAA2, RNF14, PRKCE, IGFBP3, ENTPD5, VPS13C, HUWE1, PCSK9, ABHD5, TOB1, SORL1, RGMA, RNF144B, MLXIPL, PINK1, AKT2, HECW2, CASP3, ORMDL3, ATG2A, PACSIN3, VDAC1, NUPR1, RILP	514	483	20051	1.93837	1	0.0600101	0.0567683
	GOTERM_BP_FAT	GO:0010884~positive regulation of lipid storage	5	0.900901	0.00349542	TMEM135, CIDEA, PLIN2, FITM2, ACACB	514	25	20051	7.80195	1	0.0620101	0.0586603
	GOTERM_BP_FAT	GO:0071806~protein transmembrane transport	8	1.44144	0.00353832	PEX16, PEX19, SAMM50, GRPEL1, PEX3, AKT2, TIMM23, PEX14	514	77	20051	4.05296	1	0.0625707	0.0591906
	GOTERM_BP_FAT	GO:0001666~response to hypoxia	19	3.42342	0.00368486	RWDD3, EGLN3, PRKCE, RORA, KCNA5, SDHD, ENO1, SLC2A4, SOD2, PINK1, CASP3, UCP3, ACOT2, CYP1A1, PGK1, LONP1, ALDOA, PPARGC1A, PDK1	514	346	20051	2.14215	1	0.064847	0.061344
	GOTERM_BP_FAT	GO:0006820~anion transport	29	5.22523	0.00369048	SLC25A1, SLC27A1, ABCD3, ATP8A1, PTGER3, SLC25A48, MPC1, AKT2, MPC2, SLC25A44, SLC25A22, PRELID3B, PLA2G12A, SLC36A2, ACSL1, STARD10, APOC3, ACSL3, SLC6A6, RBP4, SLC6A9, SLC25A19, CRY2, PLIN2, SFXN1, SLC25A10, VDAC1, ANK, PTGES	514	633	20051	1.78718	1	0.064847	0.061344
	GOTERM_BP_FAT	GO:1900542~regulation of purine nucleotide metabolic process	12	2.16216	0.00371269	MLXIPL, MTCH2, PINK1, PRKAA2, STIM1, ENTPD5, PGAM1, APOC3, DRD1, NUPR1, ENO1, PPARGC1A	514	166	20051	2.81998	1	0.0650309	0.0615179
	GOTERM_BP_FAT	GO:0036314~response to sterol	6	1.08108	0.0037689	GRAMD1B, INSIG1, PMVK, RORC, RORA, AACS	514	41	20051	5.70874	1	0.0658071	0.0622522
	GOTERM_BP_FAT	GO:0016557~peroxisome membrane biogenesis	3	0.540541	0.00378807	PEX16, PEX19, PEX3	514	4	20051	29.2573	1	0.0659339	0.0623722
	GOTERM_BP_FAT	GO:0000271~polysaccharide biosynthetic process	8	1.44144	0.00380353	GYS1, UGP2, GYG, AKT2, AGL, GBE1, B3GALT1, ACADM	514	78	20051	4.001	1	0.0659954	0.0624304
	GOTERM_BP_FAT	GO:0042761~very long-chain fatty acid biosynthetic process	4	0.720721	0.00393237	ELOVL5, TECR, ELOVL3, ELOVL6	514	13	20051	12.003	1	0.0680177	0.0643434
	GOTERM_BP_FAT	GO:1990845~adaptive thermogenesis	5	0.900901	0.00404856	LNCBATE1, UCP3, ZBTB7B, SORL1, PPARGC1A	514	26	20051	7.50187	1	0.0698093	0.0660382
	GOTERM_BP_FAT	GO:0015718~monocarboxylic acid transport	13	2.34234	0.00417684	PLA2G12A, SLC27A1, ABCD3, ACSL1, STARD10, ACSL3, SLC6A6, RBP4, MPC1, AKT2, MPC2, PLIN2, PTGES	514	193	20051	2.6276	1	0.0717976	0.0679191
	GOTERM_BP_FAT	GO:0051049~regulation of transport	72	12.973	0.00436468	SNAP25, ATP8A1, CHD7, PCSK9, AACS, IGHG1, RIMS4, CNST, AKT2, MPC2, LIPG, PIM1, LEPR, PRKACA, TMEM38B, SCN1B, CD177, CADPS2, IL15RA, SREBF1, SLC36A2, DGAT1, ACSL1, IGFBP3, PDE4D, PRKCE, MYRIP, ACSL3, SDHD, SHISA6, MUP3, RBP4, STIM1, HECW2, CRY2, G6PDX, MASP1, ADTRP, NAT8L, S100A9, S100A8, PTGES, NAPA, LRPAP1, NRN1, EPB41, INSIG1, PTGER3, LPAR3, KCNA5, GLRX, TOB1, ACAT2, PACSIN3, APOD, DRD1, PPARGC…	514	2036	20051	1.37952	1	0.0747941	0.0707537
	GOTERM_BP_FAT	GO:0033036~macromolecule localization	102	18.3784	0.00456322	SLC27A1, MTCH2, ATP8A1, ARXES2, TSKU, CNST, MPC2, AKT2, LIPG, LEPR, PRKACA, CD177, CADPS2, SLC15A2, STARD5, DGAT1, ACSL1, MMGT1, RALGAPA2, PRKCE, IGFBP3, ACSL3, SHISA6, BSCL2, SLC9A2, TMEM135, RBP4, ADTRP, PTGES, EPB41, INSIG1, ABHD5, ACACB, ACAT2, GRPEL1, BAG1, APOD, DRD1, SEC31B, PRELID3B, HSPA9, STARD10, CIDEA, CHCHD10, MYO5A, DHCR24, CYP51, DLG2, ATG2A, SPIRE1, SNAP25, ABCD3, PCSK9, DUSP18, A…	514	3085	20051	1.28979	1	0.077955	0.0737438
	GOTERM_BP_FAT	GO:0033559~unsaturated fatty acid metabolic process	12	2.16216	0.00464268	FADS2, CYP2D22, DAGLA, GPX4, ELOVL5, PTGES2, ELOVL3, MGST2, ELOVL6, SCD1, FADS1, PTGES	514	171	20051	2.73752	1	0.0790685	0.0747972
	GOTERM_BP_FAT	GO:0009749~response to glucose	15	2.7027	0.00467758	NDUFA9, SREBF1, PRKAA2, KCNB1, APOC3, AACS, KHK, MUP3, MLXIPL, CASP3, MPC2, LEPR, GCLM, PRKACA, PPARGC1A	514	247	20051	2.36901	1	0.0794184	0.0751282
	GOTERM_BP_FAT	GO:0036293~response to decreased oxygen levels	20	3.6036	0.00478734	RWDD3, EGLN3, PRKCE, RORA, KCNA5, SDHD, ENO1, SLC2A4, SOD2, PINK1, CASP3, UCP3, NAMPT, ACOT2, CYP1A1, PGK1, LONP1, ALDOA, PPARGC1A, PDK1	514	383	20051	2.03706	1	0.0810334	0.076656
	GOTERM_BP_FAT	GO:0030073~insulin secretion	14	2.52252	0.00504966	SREBF1, DGAT1, KCNB1, PRKCE, PTGER3, MYO5A, GLRX, MYRIP, AACS, MUP3, RBP4, MPC2, LEPR, PFKM	514	223	20051	2.44904	1	0.085213	0.0806098
	GOTERM_BP_FAT	GO:0046461~neutral lipid catabolic process	6	1.08108	0.0051307	DAGLA, LIPG, DDHD2, APOC3, ABHD5, SORL1	514	44	20051	5.31951	1	0.0857958	0.0811611
	GOTERM_BP_FAT	GO:0008210~estrogen metabolic process	6	1.08108	0.0051307	SULT1A1, CYP2D22, DHRS11, CYP1A1, HSD17B12, HSD17B10	514	44	20051	5.31951	1	0.0857958	0.0811611
	GOTERM_BP_FAT	GO:0046464~acylglycerol catabolic process	6	1.08108	0.0051307	DAGLA, LIPG, DDHD2, APOC3, ABHD5, SORL1	514	44	20051	5.31951	1	0.0857958	0.0811611
	GOTERM_BP_FAT	GO:0033993~response to lipid	46	8.28829	0.00526958	GRAMD1B, PRKAA2, RNF14, WBP2, INSIG1, PTGER3, RORC, ATP1A3, RORA, GLRX, CXCL13, ACACA, AACS, SULT1A1, GPI1, PRDX3, CASP3, UCP3, PMVK, PIM1, SCD1, PPARGC1A, TIMP4, FADS1, ESRRA, SREBF1, GPX4, ACSL1, PRKCE, PDE4D, NTRK3, AGL, FMO1, FBXO32, SOD2, MUP3, HADHB, RBP4, KLF9, CRY2, CYP1A1, ADTRP, ALDOA, S100A9, S100A8, PTGES	514	1184	20051	1.51558	1	0.0878529	0.0831071
	GOTERM_BP_FAT	GO:0006956~complement activation	15	2.7027	0.00543716	IGHV1-82, IGHV1-50, IGHV1-52, IGHV1-11, IGHV1-22, IGHV1-26, IGHG3, IGHV11-2, IGHG2C, IGHG1, IGHA, IGHV5-9, IGLC1, MASP1, IGHV3-6	514	251	20051	2.33126	1	0.0903744	0.0854923
	GOTERM_BP_FAT	GO:0043623~cellular protein complex assembly	30	5.40541	0.0055595	NAPA, COX19, SNAP25, NDUFB9, GDA, ODAD4, NDUFB5, NDUFA10, MT-ND1, PIP4P1, SAMM50, PSMD4, PSMD5, LONP1, UQCRFS1, PMEPA1, RAB5IF, TMOD1, NDUFA9, CADPS2, NDUFA6, GPX4, PRKCE, ADRM1, PRLR, NDUFS8, UQCRC1, SPIRE1, NDUFS2, NDUFS1	514	683	20051	1.71346	1	0.0921313	0.0871544
	GOTERM_BP_FAT	GO:0032933~SREBP signaling pathway	4	0.720721	0.00602276	SREBF1, LPCAT3, INSIG1, ZBTB7B	514	15	20051	10.4026	1	0.0986271	0.0932993
	GOTERM_BP_FAT	GO:1904923~regulation of mitophagy in response to mitochondrial depolarization	4	0.720721	0.00602276	PINK1, VPS13C, HUWE1, VDAC1	514	15	20051	10.4026	1	0.0986271	0.0932993
	GOTERM_BP_FAT	GO:0010889~regulation of sequestering of triglyceride	4	0.720721	0.00602276	CIDEA, PLIN2, FITM2, ABHD5	514	15	20051	10.4026	1	0.0986271	0.0932993
	GOTERM_BP_FAT	GO:1904925~positive regulation of mitophagy in response to mitochondrial depolarization	4	0.720721	0.00602276	PINK1, VPS13C, HUWE1, VDAC1	514	15	20051	10.4026	1	0.0986271	0.0932993
	GOTERM_BP_FAT	GO:0050995~negative regulation of lipid catabolic process	5	0.900901	0.00605541	BSCL2, CIDEA, APOC3, ACACB, SORL1	514	29	20051	6.72582	1	0.0987139	0.0933814
	GOTERM_BP_FAT	GO:0006958~complement activation, classical pathway	14	2.52252	0.00606373	IGHV1-82, IGHV1-50, IGHV1-52, IGHV1-11, IGHV1-22, IGHV1-26, IGHG3, IGHV11-2, IGHG2C, IGHG1, IGHA, IGHV5-9, IGLC1, IGHV3-6	514	228	20051	2.39533	1	0.0987139	0.0933814
	GOTERM_BP_FAT	GO:0009051~pentose-phosphate shunt, oxidative branch	3	0.540541	0.00620664	G6PDX, PGLS, PGD	514	5	20051	23.4058	1	0.0998655	0.0944708
	GOTERM_BP_FAT	GO:0006550~isoleucine catabolic process	3	0.540541	0.00620664	BCKDK, HSD17B10, BCAT2	514	5	20051	23.4058	1	0.0998655	0.0944708
	GOTERM_BP_FAT	GO:0046490~isopentenyl diphosphate metabolic process	3	0.540541	0.00620664	IDI1, PMVK, MVD	514	5	20051	23.4058	1	0.0998655	0.0944708
	GOTERM_BP_FAT	GO:0009240~isopentenyl diphosphate biosynthetic process	3	0.540541	0.00620664	IDI1, PMVK, MVD	514	5	20051	23.4058	1	0.0998655	0.0944708
	GOTERM_BP_FAT	GO:0015909~long-chain fatty acid transport	7	1.26126	0.00628589	SLC27A1, PLA2G12A, ABCD3, ACSL1, AKT2, PLIN2, ACSL3	514	65	20051	4.20105	1	0.100848	0.0953998
	GOTERM_BP_FAT	GO:0071456~cellular response to hypoxia	11	1.98198	0.00637154	EGLN3, RWDD3, PINK1, PRKCE, PGK1, RORA, SLC2A4, SDHD, ENO1, PPARGC1A, PDK1	514	154	20051	2.78641	1	0.101926	0.0964202
	GOTERM_BP_FAT	GO:0050801~ion homeostasis	37	6.66667	0.00655318	COX19, PRKAA2, CHD7, PTGER3, ATP1A3, CIB2, KCNA5, LPAR3, CXCL13, ATP5B, LIPG, DRD1, TMEM38B, SCN1B, PDK2, ATP6V1G1, GLRX3, DMPK, DGAT1, PRKCE, PDE4D, NCOA4, IMMT, RMDN3, MYO5A, SOD2, ATOX1, LETM1, SLC9A2, AFG3L2, MLXIPL, STIM1, LCN2, ACO1, TLCD1, GCLM, ANK	514	910	20051	1.58611	1	0.10453	0.0988831
	GOTERM_BP_FAT	GO:0034762~regulation of transmembrane transport	25	4.5045	0.00669536	CHD7, PTGER3, PCSK9, KCNA5, GLRX, AKT2, PIM1, DRD1, TMEM38B, PPARGC1A, SCN1B, ACSL1, KCNB1, PRKCE, PDE4D, KCNJ15, MYO5A, SHISA6, PINK1, STIM1, SLC6A9, HECW2, G6PDX, LCN2, FXYD6	514	541	20051	1.80267	1	0.106491	0.100738
	GOTERM_BP_FAT	GO:0070482~response to oxygen levels	22	3.96396	0.00672163	RWDD3, ATP6V1G1, EGLN3, PRKCE, RORA, KCNA5, SDHD, ENO1, SLC2A4, SOD2, PINK1, CASP3, UCP3, NAMPT, ACOT2, CYP1A1, PGK1, LONP1, NDUFS2, ALDOA, PPARGC1A, PDK1	514	453	20051	1.89451	1	0.106602	0.100844
	GOTERM_BP_FAT	GO:0045017~glycerolipid biosynthetic process	12	2.16216	0.0067748	SREBF1, VAC14, SLC27A1, PCYT2, DGAT1, ACSL1, LPCAT3, APOC3, CHPT1, ACSL3, ABHD5, AGPAT2	514	180	20051	2.60065	1	0.107139	0.101351
	GOTERM_BP_FAT	GO:0036315~cellular response to sterol	5	0.900901	0.00684818	GRAMD1B, INSIG1, RORC, RORA, AACS	514	30	20051	6.50162	1	0.107991	0.102157
	GOTERM_BP_FAT	GO:0071501~cellular response to sterol depletion	4	0.720721	0.00727338	SREBF1, LPCAT3, INSIG1, ZBTB7B	514	16	20051	9.75243	1	0.113724	0.10758
	GOTERM_BP_FAT	GO:0045717~negative regulation of fatty acid biosynthetic process	4	0.720721	0.00727338	ACADVL, ACADL, INSIG1, APOC3	514	16	20051	9.75243	1	0.113724	0.10758
	GOTERM_BP_FAT	GO:1901526~positive regulation of macromitophagy	4	0.720721	0.00727338	PINK1, VPS13C, HUWE1, VDAC1	514	16	20051	9.75243	1	0.113724	0.10758
	GOTERM_BP_FAT	GO:0009991~response to extracellular stimulus	27	4.86486	0.00729595	PRKAA2, COX4I1, PCSK9, GPT, ACACB, AACS, UCP3, NAMPT, LIPG, PIM1, ACADM, PPARGC1A, FADS1, PDK2, CADPS2, SREBF1, ACSL1, KCNB1, AGL, ACSL3, SOD2, SORL1, TMEM135, DPYD, CYP1A1, PLIN2, GCLM	514	605	20051	1.74093	1	0.113728	0.107584
	GOTERM_BP_FAT	GO:0046889~positive regulation of lipid biosynthetic process	9	1.62162	0.00731474	SREBF1, MLXIPL, SLC27A1, PCX, DGAT1, ELOVL5, APOC3, ACSL3, PPARGC1A	514	110	20051	3.1917	1	0.113728	0.107584
	GOTERM_BP_FAT	GO:0045923~positive regulation of fatty acid metabolic process	6	1.08108	0.00744395	SREBF1, MLXIPL, DGAT1, ELOVL5, AKT2, PPARGC1A	514	48	20051	4.87622	1	0.115413	0.109178
	GOTERM_BP_FAT	GO:0051649~establishment of localization in cell	77	13.8739	0.00757426	SNAP25, MT-ND4L, MTCH2, CHD7, NDUFA10, PCSK9, ARXES2, DUSP18, MT-ND1, RIMS4, AKT2, MPC2, MLX, LEPR, KIF1C, PRKACA, TMEM38B, YWHAG, CADPS2, SREBF1, VPS13C, PDE4D, PRKCE, NCOA4, TIMM23, MYRIP, SDHD, SDHA, MUP3, NDUFS8, STIM1, RILPL2, PEX3, CRY2, TBC1D24, NDUFS2, NDUFS1, NAT8L, NAPA, GRAMD1B, NDUFB9, NRN1, NDUFB5, INSIG1, ATP5A1, DERL1, TRAK1, ATP5O, TOB1, ATP5L, ATP5B, SAMM50, GRPEL1, MAP6, APOD, D…	514	2258	20051	1.33027	1	0.117105	0.110779
	GOTERM_BP_FAT	GO:0090208~positive regulation of triglyceride metabolic process	5	0.900901	0.00770664	SREBF1, SLC27A1, DGAT1, APOC3, ABHD5	514	31	20051	6.29189	1	0.11882	0.112401
	GOTERM_BP_FAT	GO:0097006~regulation of plasma lipoprotein particle levels	7	1.26126	0.00781446	LRPAP1, DGAT1, LPCAT3, LIPG, APOC3, PCSK9, ACSL3	514	68	20051	4.01571	1	0.119484	0.113029
	GOTERM_BP_FAT	GO:0051055~negative regulation of lipid biosynthetic process	7	1.26126	0.00781446	SLC27A1, ACADVL, ACADL, INSIG1, ORMDL3, APOC3, MUP3	514	68	20051	4.01571	1	0.119484	0.113029
	GOTERM_BP_FAT	GO:1905953~negative regulation of lipid localization	7	1.26126	0.00781446	AKT2, IGFBP3, CRY2, APOC3, PCSK9, ABHD5, MUP3	514	68	20051	4.01571	1	0.119484	0.113029
	GOTERM_BP_FAT	GO:1901698~response to nitrogen compound	48	8.64865	0.00800167	SLC27A1, PRKAA2, INSIG1, PCSK9, ATP1A3, CIB2, GPT, SLC2A4, ATP5O, AACS, KHK, RBM3, GPI1, AKT2, CASP3, UCP3, NAMPT, LONP1, CTNNA1, CYC1, DRD1, ZBTB7B, TMEM38B, PPARGC1A, TIMP4, YWHAG, FADS1, PDK2, SH2B2, ESRRA, SREBF1, PRKCE, VPS13C, PDE4D, ADRM1, SERPINA3K, APOC3, MYO5A, SORL1, CYP51, HADHA, RBP4, PKM, CRY2, UQCRC1, MT-CYTB, ALDOA, GCLM	514	1279	20051	1.46401	1	0.122009	0.115418
	GOTERM_BP_FAT	GO:0071375~cellular response to peptide hormone stimulus	17	3.06306	0.00811107	ESRRA, SREBF1, SLC27A1, INSIG1, ADRM1, PCSK9, MYO5A, GPT, SLC2A4, SORL1, PKM, AKT2, LONP1, ZBTB7B, YWHAG, PDK2, SH2B2	514	318	20051	2.08543	1	0.123337	0.116675
	GOTERM_BP_FAT	GO:0099024~plasma membrane invagination	15	2.7027	0.00834289	IGHV1-82, IGHV1-50, IGHV1-52, IGHV1-11, IGHV1-22, IGHV1-26, IGHG3, IGHV11-2, IGHG2C, IGHG1, IGHA, IGHV5-9, SPIRE1, IGLC1, IGHV3-6	514	264	20051	2.21646	1	0.126515	0.11968
	GOTERM_BP_FAT	GO:0060612~adipose tissue development	7	1.26126	0.00837871	BSCL2, PGRMC2, ADRM1, RORC, SORL1, PPARGC1A, AACS	514	69	20051	3.95751	1	0.126711	0.119866
	GOTERM_BP_FAT	GO:0036294~cellular response to decreased oxygen levels	12	2.16216	0.00857656	EGLN3, RWDD3, PINK1, PRKCE, NAMPT, PGK1, RORA, SLC2A4, SDHD, ENO1, PPARGC1A, PDK1	514	186	20051	2.51676	1	0.129349	0.122362
	GOTERM_BP_FAT	GO:1903579~negative regulation of ATP metabolic process	5	0.900901	0.00863292	MLXIPL, MTCH2, APOC3, NUPR1, PPARGC1A	514	32	20051	6.09527	1	0.129846	0.122831
	GOTERM_BP_FAT	GO:0015936~coenzyme A metabolic process	4	0.720721	0.00866629	NUDT7, PPCS, PANK1, COASY	514	17	20051	9.17876	1	0.129994	0.122972
	GOTERM_BP_FAT	GO:0043269~regulation of ion transport	33	5.94595	0.00874969	ATP8A1, EPB41, CHD7, PTGER3, PCSK9, KCNA5, GLRX, LPAR3, AKT2, PACSIN3, DRD1, TMEM38B, PPARGC1A, SCN1B, SLC36A2, DMPK, ACSL1, KCNB1, PRKCE, PDE4D, KCNJ15, MYO5A, SHISA6, PINK1, STIM1, SLC6A9, HECW2, CRY2, G6PDX, LCN2, FXYD6, NAT8L, PTGES	514	801	20051	1.60714	1	0.130796	0.12373
	GOTERM_BP_FAT	GO:0031331~positive regulation of cellular catabolic process	20	3.6036	0.0087835	PRKAA2, RNF14, IGFBP3, ENTPD5, VPS13C, HUWE1, PCSK9, ABHD5, TOB1, RGMA, RNF144B, MLXIPL, PINK1, AKT2, CASP3, ORMDL3, ATG2A, PACSIN3, VDAC1, NUPR1	514	406	20051	1.92166	1	0.130796	0.12373
	GOTERM_BP_FAT	GO:0010822~positive regulation of mitochondrion organization	8	1.44144	0.00879062	PINK1, VPS13C, HUWE1, DDHD2, CHCHD10, SPIRE1, VDAC1, PPARGC1A	514	91	20051	3.42943	1	0.130796	0.12373
	GOTERM_BP_FAT	GO:0034765~regulation of ion transmembrane transport	24	4.32432	0.00911264	ACSL1, KCNB1, PRKCE, PDE4D, CHD7, PTGER3, KCNJ15, PCSK9, MYO5A, KCNA5, GLRX, SHISA6, PINK1, STIM1, SLC6A9, AKT2, HECW2, G6PDX, LCN2, FXYD6, DRD1, TMEM38B, PPARGC1A, SCN1B	514	525	20051	1.7833	1	0.134683	0.127408
	GOTERM_BP_FAT	GO:0015919~peroxisomal membrane transport	3	0.540541	0.00915277	PEX16, PEX19, PEX3	514	6	20051	19.5049	1	0.134683	0.127408
	GOTERM_BP_FAT	GO:2001293~malonyl-CoA metabolic process	3	0.540541	0.00915277	NUDT7, ACACB, ACACA	514	6	20051	19.5049	1	0.134683	0.127408
	GOTERM_BP_FAT	GO:0045046~protein import into peroxisome membrane	3	0.540541	0.00915277	PEX16, PEX19, PEX3	514	6	20051	19.5049	1	0.134683	0.127408
	GOTERM_BP_FAT	GO:1901653~cellular response to peptide	19	3.42342	0.00917354	ESRRA, SREBF1, SLC27A1, INSIG1, ADRM1, PCSK9, ATP1A3, MYO5A, GPT, SLC2A4, SORL1, PKM, AKT2, NAMPT, LONP1, ZBTB7B, YWHAG, PDK2, SH2B2	514	379	20051	1.95563	1	0.134683	0.127408
	GOTERM_BP_FAT	GO:1901701~cellular response to oxygen-containing compound	53	9.54955	0.00920462	SLC27A1, RORC, PCSK9, CIB2, RORA, GPT, SLC2A4, CXCL13, AACS, AKT2, MPC2, NAMPT, PIM1, LONP1, LEPR, PRKACA, PDK2, YWHAG, SREBF1, PDE4D, PRKCE, MUP3, HADHB, PKM, GRAMD1B, PRKAA2, INSIG1, PTGER3, ATP1A3, GLRX, ATP5O, ACACA, PRDX3, PRDX1, CTNNA1, DRD1, ZBTB7B, PPARGC1A, SH2B2, ESRRA, KCNB1, NTRK3, ADRM1, APOC3, MYO5A, FBXO32, SOD2, SORL1, MLXIPL, PINK1, KLF9, LCN2, GCLM	514	1455	20051	1.42097	1	0.134782	0.127501
	GOTERM_BP_FAT	GO:0019433~triglyceride catabolic process	5	0.900901	0.00962903	LIPG, DDHD2, APOC3, ABHD5, SORL1	514	33	20051	5.91056	1	0.140624	0.133028
	GOTERM_BP_FAT	GO:0009410~response to xenobiotic stimulus	17	3.06306	0.00989824	PRKAA2, ACSL1, RORC, ATP1A3, FMO1, RORA, ACAA1B, SOD2, AACS, SULT1A1, HADHA, CYP2D22, DPYD, LCN2, CYP1A1, DRD1, GCLM	514	325	20051	2.04051	1	0.144176	0.136387
	GOTERM_BP_FAT	GO:0010959~regulation of metal ion transport	22	3.96396	0.0100039	DMPK, EPB41, PRKCE, PDE4D, CHD7, PTGER3, PCSK9, MYO5A, KCNA5, GLRX, LPAR3, STIM1, SLC6A9, AKT2, HECW2, G6PDX, LCN2, PACSIN3, FXYD6, DRD1, TMEM38B, SCN1B	514	470	20051	1.82599	1	0.144829	0.137005
	GOTERM_BP_FAT	GO:0030730~sequestering of triglyceride	4	0.720721	0.0102047	CIDEA, PLIN2, FITM2, ABHD5	514	18	20051	8.66883	1	0.144829	0.137005
	GOTERM_BP_FAT	GO:0072663~establishment of protein localization to peroxisome	4	0.720721	0.0102047	PEX16, PEX19, PEX3, PEX14	514	18	20051	8.66883	1	0.144829	0.137005
	GOTERM_BP_FAT	GO:0046322~negative regulation of fatty acid oxidation	4	0.720721	0.0102047	ACADVL, ACADL, FMO1, ACACB	514	18	20051	8.66883	1	0.144829	0.137005
	GOTERM_BP_FAT	GO:0005980~glycogen catabolic process	4	0.720721	0.0102047	AGL, PYGL, PFKM, PGM1	514	18	20051	8.66883	1	0.144829	0.137005
	GOTERM_BP_FAT	GO:0006577~amino-acid betaine metabolic process	4	0.720721	0.0102047	ACADL, CHDH, ACADM, CRAT	514	18	20051	8.66883	1	0.144829	0.137005
	GOTERM_BP_FAT	GO:0042754~negative regulation of circadian rhythm	4	0.720721	0.0102047	PTGER3, CRY2, LEPR, DRD1	514	18	20051	8.66883	1	0.144829	0.137005
	GOTERM_BP_FAT	GO:0043574~peroxisomal transport	4	0.720721	0.0102047	PEX16, PEX19, PEX3, PEX14	514	18	20051	8.66883	1	0.144829	0.137005
	GOTERM_BP_FAT	GO:0072662~protein localization to peroxisome	4	0.720721	0.0102047	PEX16, PEX19, PEX3, PEX14	514	18	20051	8.66883	1	0.144829	0.137005
	GOTERM_BP_FAT	GO:0006625~protein targeting to peroxisome	4	0.720721	0.0102047	PEX16, PEX19, PEX3, PEX14	514	18	20051	8.66883	1	0.144829	0.137005
	GOTERM_BP_FAT	GO:0002455~humoral immune response mediated by circulating immunoglobulin	14	2.52252	0.0103981	IGHV1-82, IGHV1-50, IGHV1-52, IGHV1-11, IGHV1-22, IGHV1-26, IGHG3, IGHV11-2, IGHG2C, IGHG1, IGHA, IGHV5-9, IGLC1, IGHV3-6	514	244	20051	2.23826	1	0.147196	0.139245
	GOTERM_BP_FAT	GO:0010324~membrane invagination	15	2.7027	0.0106626	IGHV1-82, IGHV1-50, IGHV1-52, IGHV1-11, IGHV1-22, IGHV1-26, IGHG3, IGHV11-2, IGHG2C, IGHG1, IGHA, IGHV5-9, SPIRE1, IGLC1, IGHV3-6	514	272	20051	2.15127	1	0.150555	0.142422
	GOTERM_BP_FAT	GO:0071705~nitrogen compound transport	74	13.3333	0.0108485	SNAP25, SLC27A1, CHD7, ARXES2, DUSP18, AACS, PTMS, SLC25A48, CNST, AKT2, MPC2, LEPR, PRKACA, SLC25A44, YWHAG, TMEM14C, CADPS2, SREBF1, SLC15A2, SLC36A2, DGAT1, VPS13C, PRKCE, NCOA4, TIMM23, MYRIP, ACSL3, SDHD, MUP3, RBP4, RILPL2, TST, SLC25A19, PEX3, CRY2, ADTRP, NAT8L, S100A9, S100A8, NAPA, SLC43A3, INSIG1, PTGER3, DERL1, GLRX, TRAK1, TOB1, PGRMC2, SAMM50, GRPEL1, APOD, DRD1, SLC25A20, SLC25A22,…	514	2190	20051	1.31814	1	0.15279	0.144536
	GOTERM_BP_FAT	GO:0009261~ribonucleotide catabolic process	6	1.08108	0.0112474	ENTPD4B, NUDT7, GDA, ENTPD5, PDE4D, DPYD	514	53	20051	4.4162	1	0.158007	0.149471
	GOTERM_BP_FAT	GO:0034754~cellular hormone metabolic process	10	1.8018	0.0114077	SULT1A1, HSD11B1, RBP4, CYP2D22, DHRS11, RDH11, CYP1A1, HSD17B12, HSD17B10, PPARGC1A	514	143	20051	2.72795	1	0.15949	0.150874
	GOTERM_BP_FAT	GO:0010821~regulation of mitochondrion organization	11	1.98198	0.0114107	SREBF1, TMEM135, MTCH2, PINK1, VPS13C, HUWE1, DDHD2, CHCHD10, SPIRE1, VDAC1, PPARGC1A	514	168	20051	2.55421	1	0.15949	0.150874
	GOTERM_BP_FAT	GO:0090140~regulation of mitochondrial fission	5	0.900901	0.0118383	TMEM135, PINK1, DDHD2, SPIRE1, PPARGC1A	514	35	20051	5.57282	1	0.163729	0.154884
	GOTERM_BP_FAT	GO:0010867~positive regulation of triglyceride biosynthetic process	4	0.720721	0.0118914	SREBF1, SLC27A1, DGAT1, APOC3	514	19	20051	8.21257	1	0.163729	0.154884
	GOTERM_BP_FAT	GO:0097067~cellular response to thyroid hormone stimulus	4	0.720721	0.0118914	KLF9, ATP1A3, GCLM, PPARGC1A	514	19	20051	8.21257	1	0.163729	0.154884
	GOTERM_BP_FAT	GO:0044247~cellular polysaccharide catabolic process	4	0.720721	0.0118914	AGL, PYGL, PFKM, PGM1	514	19	20051	8.21257	1	0.163729	0.154884
	GOTERM_BP_FAT	GO:0009251~glucan catabolic process	4	0.720721	0.0118914	AGL, PYGL, PFKM, PGM1	514	19	20051	8.21257	1	0.163729	0.154884
	GOTERM_BP_FAT	GO:1904478~regulation of intestinal absorption	4	0.720721	0.0118914	DGAT1, EPB41, LPCAT3, ACAT2	514	19	20051	8.21257	1	0.163729	0.154884
	GOTERM_BP_FAT	GO:1903008~organelle disassembly	9	1.62162	0.0120517	PINK1, PRKAA2, VPS13C, ATG2A, HUWE1, PLIN2, VDAC1, PPARGC1A, RETREG1	514	120	20051	2.92573	1	0.165114	0.156195
	GOTERM_BP_FAT	GO:0019218~regulation of steroid metabolic process	9	1.62162	0.0120517	SREBF1, ACADVL, ACADL, LPCAT3, INSIG1, RORC, RORA, SCD1, PPARGC1A	514	120	20051	2.92573	1	0.165114	0.156195
	GOTERM_BP_FAT	GO:0032024~positive regulation of insulin secretion	8	1.44144	0.0122571	RBP4, PRKCE, MPC2, LEPR, GLRX, MYRIP, PFKM, AACS	514	97	20051	3.2173	1	0.167514	0.158465
	GOTERM_BP_FAT	GO:0006102~isocitrate metabolic process	3	0.540541	0.012598	IDH3G, IDH3B, ACO2	514	7	20051	16.7185	1	0.170073	0.160886
	GOTERM_BP_FAT	GO:0034626~fatty acid elongation, polyunsaturated fatty acid	3	0.540541	0.012598	ELOVL5, ELOVL3, ELOVL6	514	7	20051	16.7185	1	0.170073	0.160886
	GOTERM_BP_FAT	GO:0034625~fatty acid elongation, monounsaturated fatty acid	3	0.540541	0.012598	ELOVL5, ELOVL3, ELOVL6	514	7	20051	16.7185	1	0.170073	0.160886
	GOTERM_BP_FAT	GO:0019368~fatty acid elongation, unsaturated fatty acid	3	0.540541	0.012598	ELOVL5, ELOVL3, ELOVL6	514	7	20051	16.7185	1	0.170073	0.160886
	GOTERM_BP_FAT	GO:0019367~fatty acid elongation, saturated fatty acid	3	0.540541	0.012598	ELOVL5, ELOVL3, ELOVL6	514	7	20051	16.7185	1	0.170073	0.160886
	GOTERM_BP_FAT	GO:0042391~regulation of membrane potential	22	3.96396	0.0127101	MTCH2, DMPK, KCNB1, PRKCE, NTRK3, CHCHD10, ATP1A3, KCNA5, GLRX, SOD2, PRDX3, BSCL2, RIMS4, PINK1, TMEM135, AKT2, TBC1D24, NDUFS1, DRD1, GCLM, DLD, SCN1B	514	481	20051	1.78423	1	0.170913	0.16168
	GOTERM_BP_FAT	GO:0072376~protein activation cascade	15	2.7027	0.012722	IGHV1-82, IGHV1-50, IGHV1-52, IGHV1-11, IGHV1-22, IGHV1-26, IGHG3, IGHV11-2, IGHG2C, IGHG1, IGHA, IGHV5-9, IGLC1, MASP1, IGHV3-6	514	278	20051	2.10484	1	0.170913	0.16168
	GOTERM_BP_FAT	GO:0010033~response to organic substance	122	21.982	0.0131884	KLB, SLC27A1, RORC, CIB2, RORA, ENO1, CXCL13, TSKU, MPC1, MPC2, AKT2, NAMPT, PIM1, LONP1, LEPR, PRKACA, TMEM38B, PDK2, FADS1, IL15RA, ACSL1, PRKCE, ACSL3, PRLR, RBP4, CDC34, CYP2D22, UQCRC1, CDIP1, ADTRP, S100A9, S100A8, PTGES, IDI1, INSIG1, ATP5O, ACACB, FBXO44, ACACA, SULT1A1, PRDX3, ATP5B, PMVK, ST3GAL6, CYC1, DRD1, ZBTB7B, PPARGC1A, ESRRA, HSPA9, PMM1, CIDEA, SERPINA3K, MYO5A, DHCR24, FBXO32,…	514	3926	20051	1.21222	1	0.17675	0.167202
	GOTERM_BP_FAT	GO:0071333~cellular response to glucose stimulus	11	1.98198	0.0143166	MLXIPL, PRKAA2, KCNB1, MPC2, LEPR, APOC3, GCLM, PRKACA, PPARGC1A, AACS, MUP3	514	174	20051	2.46613	1	0.191236	0.180906
	GOTERM_BP_FAT	GO:0032369~negative regulation of lipid transport	5	0.900901	0.0143485	AKT2, IGFBP3, CRY2, APOC3, PCSK9	514	37	20051	5.27158	1	0.191236	0.180906
	GOTERM_BP_FAT	GO:0046903~secretion	43	7.74775	0.014373	NAPA, SNAP25, NRN1, CHD7, PTGER3, GLRX, AACS, RIMS4, MPC2, LEPR, DRD1, ZBTB7B, TMEM38B, PRKACA, CD177, CADPS2, ARFGEF2, SREBF1, PLA2G12A, DGAT1, PTGES2, KCNB1, PRKCE, IGFBP3, STARD10, MYO5A, ACSL3, SDHD, MYRIP, PRLR, SORL1, CYP51, MUP3, RBP4, PINK1, SLC6A9, CRY2, TMEM79, ADTRP, PFKM, S100A9, S100A8, PTGES	514	1157	20051	1.4498	1	0.191236	0.180906
	GOTERM_BP_FAT	GO:1904062~regulation of cation transmembrane transport	19	3.42342	0.0144518	PRKCE, PDE4D, CHD7, PTGER3, PCSK9, MYO5A, GLRX, SHISA6, PINK1, STIM1, SLC6A9, HECW2, G6PDX, LCN2, FXYD6, DRD1, TMEM38B, PPARGC1A, SCN1B	514	398	20051	1.86227	1	0.191824	0.181462
	GOTERM_BP_FAT	GO:0006911~phagocytosis, engulfment	14	2.52252	0.0145791	IGHV1-82, IGHV1-50, IGHV1-52, IGHV1-11, IGHV1-22, IGHV1-26, IGHG3, IGHV11-2, IGHG2C, IGHG1, IGHA, IGHV5-9, IGLC1, IGHV3-6	514	255	20051	2.14171	1	0.193051	0.182622
	GOTERM_BP_FAT	GO:0009266~response to temperature stimulus	12	2.16216	0.0147064	RBM3, TMEM135, SLC27A1, ACADVL, ACADL, UCP3, CIDEA, ACADM, SOD2, ALDOA, PRKACA, PPARGC1A	514	201	20051	2.32894	1	0.194272	0.183778
	GOTERM_BP_FAT	GO:0008037~cell recognition	17	3.06306	0.0150552	IGHV1-82, IGHV1-50, IGHV1-52, IGHV1-11, IGHV1-22, IGHV1-26, PCSK4, IGHG3, IGHV11-2, IGHG2C, IGHG1, IGHA, CASP3, IGHV5-9, IGLC1, ALDOA, IGHV3-6	514	341	20051	1.94477	1	0.198406	0.187688
	GOTERM_BP_FAT	GO:0071331~cellular response to hexose stimulus	11	1.98198	0.0153985	MLXIPL, PRKAA2, KCNB1, MPC2, LEPR, APOC3, GCLM, PRKACA, PPARGC1A, AACS, MUP3	514	176	20051	2.43811	1	0.202448	0.191512
	GOTERM_BP_FAT	GO:0023061~signal release	24	4.32432	0.0156983	NAPA, SNAP25, CADPS2, SREBF1, NRN1, DGAT1, KCNB1, PRKCE, CHD7, PTGER3, MYO5A, GLRX, MYRIP, AACS, MUP3, RIMS4, RBP4, SLC6A9, MPC2, CRY2, LEPR, DRD1, PRKACA, PFKM	514	551	20051	1.69915	1	0.203776	0.192768
	GOTERM_BP_FAT	GO:0071071~regulation of phospholipid biosynthetic process	4	0.720721	0.0157178	BSCL2, SLC27A1, PCX, ACSL3	514	21	20051	7.43042	1	0.203776	0.192768
	GOTERM_BP_FAT	GO:0000422~mitophagy	7	1.26126	0.0157189	PINK1, VPS13C, ATG2A, HUWE1, VDAC1, PPARGC1A, RETREG1	514	79	20051	3.45656	1	0.203776	0.192768
	GOTERM_BP_FAT	GO:0061726~mitochondrion disassembly	7	1.26126	0.0157189	PINK1, VPS13C, ATG2A, HUWE1, VDAC1, PPARGC1A, RETREG1	514	79	20051	3.45656	1	0.203776	0.192768
	GOTERM_BP_FAT	GO:1903146~regulation of mitophagy	5	0.900901	0.0157204	SREBF1, PINK1, VPS13C, HUWE1, VDAC1	514	38	20051	5.13286	1	0.203776	0.192768
	GOTERM_BP_FAT	GO:0019432~triglyceride biosynthetic process	5	0.900901	0.0157204	SREBF1, SLC27A1, DGAT1, ACSL1, APOC3	514	38	20051	5.13286	1	0.203776	0.192768
	GOTERM_BP_FAT	GO:0002791~regulation of peptide secretion	18	3.24324	0.0158114	SREBF1, KCNB1, PRKCE, CHD7, PTGER3, GLRX, MYRIP, SORL1, AACS, CYP51, MUP3, RBP4, MPC2, LEPR, ADTRP, S100A9, PFKM, S100A8	514	372	20051	1.88757	1	0.204476	0.193431
	GOTERM_BP_FAT	GO:0006461~protein complex assembly	44	7.92793	0.0159268	NAPA, COX19, SNAP25, NDUFB9, GDA, ODAD4, NDUFB5, NDUFA10, KCNA5, ATP5G3, CXCL13, HSD17B10, ACACB, ACACA, MT-ND1, PIP4P1, SAMM50, PSMD4, PSMD5, ME1, LONP1, UQCRFS1, PMEPA1, RAB5IF, TMOD1, NDUFA9, TMEM120B, CADPS2, NDUFA6, GPX4, KCNB1, PRKCE, ADRM1, SOD2, PRLR, SORL1, KCTD6, LETM1, NDUFS8, UQCRC1, SPIRE1, NDUFS2, NDUFS1, ALDOA	514	1198	20051	1.43274	1	0.205011	0.193936
	GOTERM_BP_FAT	GO:0070271~protein complex biogenesis	44	7.92793	0.0159268	NAPA, COX19, SNAP25, NDUFB9, GDA, ODAD4, NDUFB5, NDUFA10, KCNA5, ATP5G3, CXCL13, HSD17B10, ACACB, ACACA, MT-ND1, PIP4P1, SAMM50, PSMD4, PSMD5, ME1, LONP1, UQCRFS1, PMEPA1, RAB5IF, TMOD1, NDUFA9, TMEM120B, CADPS2, NDUFA6, GPX4, KCNB1, PRKCE, ADRM1, SOD2, PRLR, SORL1, KCTD6, LETM1, NDUFS8, UQCRC1, SPIRE1, NDUFS2, NDUFS1, ALDOA	514	1198	20051	1.43274	1	0.205011	0.193936
	GOTERM_BP_FAT	GO:0051289~protein homotetramerization	6	1.08108	0.0161976	ME1, SOD2, ALDOA, ACACB, HSD17B10, ACACA	514	58	20051	4.03549	1	0.208013	0.196776
	GOTERM_BP_FAT	GO:0006549~isoleucine metabolic process	3	0.540541	0.016515	BCKDK, HSD17B10, BCAT2	514	8	20051	14.6286	1	0.209976	0.198633
	GOTERM_BP_FAT	GO:0035900~response to isolation stress	3	0.540541	0.016515	ACO2, SOD2, FADS1	514	8	20051	14.6286	1	0.209976	0.198633
	GOTERM_BP_FAT	GO:0044539~long-chain fatty acid import	3	0.540541	0.016515	SLC27A1, ACSL1, ACSL3	514	8	20051	14.6286	1	0.209976	0.198633
	GOTERM_BP_FAT	GO:0006573~valine metabolic process	3	0.540541	0.016515	ACAD8, BCKDK, BCAT2	514	8	20051	14.6286	1	0.209976	0.198633
	GOTERM_BP_FAT	GO:0071326~cellular response to monosaccharide stimulus	11	1.98198	0.0165401	MLXIPL, PRKAA2, KCNB1, MPC2, LEPR, APOC3, GCLM, PRKACA, PPARGC1A, AACS, MUP3	514	178	20051	2.41071	1	0.209976	0.198633
	GOTERM_BP_FAT	GO:0070542~response to fatty acid	8	1.44144	0.0166148	SREBF1, PRKAA2, ACSL1, PRKCE, SCD1, PPARGC1A, ACACA, AACS	514	103	20051	3.02988	1	0.210441	0.199073
	GOTERM_BP_FAT	GO:0051046~regulation of secretion	32	5.76577	0.0170398	NAPA, SNAP25, NRN1, CHD7, PTGER3, GLRX, AACS, RIMS4, MPC2, LEPR, DRD1, CD177, CADPS2, SREBF1, KCNB1, PRKCE, IGFBP3, MYO5A, ACSL3, SDHD, MYRIP, SORL1, CYP51, MUP3, RBP4, PINK1, CRY2, ADTRP, PFKM, S100A9, S100A8, PTGES	514	810	20051	1.54113	1	0.215332	0.2037
	GOTERM_BP_FAT	GO:0000423~macromitophagy	5	0.900901	0.017172	PINK1, VPS13C, HUWE1, VDAC1, RETREG1	514	39	20051	5.00125	1	0.216508	0.204812
	GOTERM_BP_FAT	GO:0006656~phosphatidylcholine biosynthetic process	4	0.720721	0.0178605	SLC27A1, LPCAT3, CHPT1, ACSL3	514	22	20051	7.09268	1	0.22366	0.211578
	GOTERM_BP_FAT	GO:0098780~response to mitochondrial depolarisation	4	0.720721	0.0178605	PINK1, VPS13C, HUWE1, VDAC1	514	22	20051	7.09268	1	0.22366	0.211578
	GOTERM_BP_FAT	GO:1901524~regulation of macromitophagy	4	0.720721	0.0178605	PINK1, VPS13C, HUWE1, VDAC1	514	22	20051	7.09268	1	0.22366	0.211578
	GOTERM_BP_FAT	GO:0070585~protein localization to mitochondrion	8	1.44144	0.0182837	SREBF1, MTCH2, PINK1, SAMM50, GRPEL1, BAG1, TIMM23, DUSP18	514	105	20051	2.97217	1	0.228443	0.216103
	GOTERM_BP_FAT	GO:0010677~negative regulation of cellular carbohydrate metabolic process	6	1.08108	0.0185272	MTCH2, PGP, LEPR, NUPR1, PPARGC1A, MUP3	514	60	20051	3.90097	1	0.230964	0.218487
	GOTERM_BP_FAT	GO:0071495~cellular response to endogenous stimulus	51	9.18919	0.0186243	KLB, SLC27A1, RNF14, PCSK9, CIB2, GPT, SLC2A4, CXCL13, TSKU, AKT2, CASP3, NAMPT, LONP1, LEPR, PMEPA1, PRKACA, TMEM38B, PDK2, YWHAG, SREBF1, ACSL1, PDE4D, PRKCE, PRLR, RGMA, PKM, CRY2, ADTRP, PRKAA2, WBP2, INSIG1, ATP1A3, ATP5O, TOB1, ACACA, UCP3, CTNNA1, DRD1, ZBTB7B, PPARGC1A, SH2B2, ESRRA, NTRK3, ADRM1, CIDEA, MYO5A, FBXO32, SORL1, HIPK2, KLF9, GCLM	514	1447	20051	1.37491	1	0.231653	0.219139
	GOTERM_BP_FAT	GO:0050796~regulation of insulin secretion	12	2.16216	0.0190775	SREBF1, RBP4, KCNB1, PRKCE, MPC2, PTGER3, LEPR, GLRX, MYRIP, PFKM, AACS, MUP3	514	209	20051	2.23979	1	0.236757	0.223968
	GOTERM_BP_FAT	GO:0051604~protein maturation	17	3.06306	0.0196237	ISCA1, GLRX3, PCSK9, DHCR24, LDLRAD3, ARXES2, ENO1, SORL1, PCSK4, AFG3L2, LPCAT3, CASP3, PGK1, CYCS, MASP1, RCE1, PRKACA	514	352	20051	1.88399	1	0.242992	0.229866
	GOTERM_BP_FAT	GO:0090150~establishment of protein localization to membrane	14	2.52252	0.0199713	PEX16, SNAP25, MTCH2, PEX19, KCNB1, MMGT1, DUSP18, ACSL3, SAMM50, CNST, RILPL2, PEX3, AKT2, EMC6	514	266	20051	2.05314	1	0.246744	0.233414
	GOTERM_BP_FAT	GO:0010984~regulation of lipoprotein particle clearance	4	0.720721	0.0201574	LRPAP1, LIPG, APOC3, PCSK9	514	23	20051	6.7843	1	0.248489	0.235065
	GOTERM_BP_FAT	GO:0071827~plasma lipoprotein particle organization	5	0.900901	0.0203192	DGAT1, LPCAT3, LIPG, APOC3, ACSL3	514	41	20051	4.75728	1	0.249926	0.236425
	GOTERM_BP_FAT	GO:0010890~positive regulation of sequestering of triglyceride	3	0.540541	0.0208774	CIDEA, PLIN2, FITM2	514	9	20051	13.0032	1	0.255091	0.241311
	GOTERM_BP_FAT	GO:2000638~regulation of SREBP signaling pathway	3	0.540541	0.0208774	LPCAT3, INSIG1, ZBTB7B	514	9	20051	13.0032	1	0.255091	0.241311
	GOTERM_BP_FAT	GO:0034379~very-low-density lipoprotein particle assembly	3	0.540541	0.0208774	DGAT1, LPCAT3, ACSL3	514	9	20051	13.0032	1	0.255091	0.241311
	GOTERM_BP_FAT	GO:0042752~regulation of circadian rhythm	9	1.62162	0.0211688	PRKAA2, PTGER3, CRY2, BHLHE40, RORC, LEPR, RORA, DRD1, PPARGC1A	514	133	20051	2.63976	1	0.258082	0.24414
	GOTERM_BP_FAT	GO:0051050~positive regulation of transport	41	7.38739	0.0213587	SNAP25, ATP8A1, PCSK9, GLRX, LPAR3, AACS, ACAT2, IGHG1, CNST, AKT2, MPC2, LIPG, LEPR, DRD1, PRKACA, SCN1B, CD177, CADPS2, IL15RA, SLC36A2, ACSL1, KCNB1, PRKCE, CHCHD10, MYO5A, ACSL3, MYRIP, SORL1, RBP4, PINK1, STIM1, SLC6A9, LPCAT3, G6PDX, LCN2, MASP1, NAT8L, PFKM, S100A9, S100A8, PTGES	514	1120	20051	1.42803	1	0.259825	0.245789
	GOTERM_BP_FAT	GO:0008219~cell death	76	13.6937	0.0217802	4930453N24RIK, MTCH2, GBE1, RORC, PCSK9, PYGL, ENO1, PTMS, GPI1, RASSF2, ALDH2, RASSF3, SIX4, AKT2, CASP3, NAMPT, RASSF6, PIM1, CTSD, PDK2, PHLDA3, PDK1, UNC5A, IGFBP3, PRKCE, PRLR, ATAD3A, RNF144B, PKM, CDC34, TRAF4, ACOX2, G6PDX, TMEM79, TBC1D24, ACOT1, CDIP1, VDAC1, NDUFS1, NUPR1, S100A9, S100A8, LRPAP1, PRKAA2, MTFP1, GLRX, PRDX3, ORMDL3, BAG1, CTNNA1, DRD1, PRODH, PPARGC1A, HSPA9, EGLN3, DMP…	514	2333	20051	1.27078	1	0.264372	0.250091
	GOTERM_BP_FAT	GO:0035634~response to stilbenoid	4	0.720721	0.0226091	IDI1, CIDEA, PPARGC1A, MUP3	514	24	20051	6.50162	1	0.273157	0.258401
	GOTERM_BP_FAT	GO:1903599~positive regulation of mitophagy	4	0.720721	0.0226091	PINK1, VPS13C, HUWE1, VDAC1	514	24	20051	6.50162	1	0.273157	0.258401
	GOTERM_BP_FAT	GO:0051641~cellular localization	97	17.4775	0.0226832	MT-ND4L, MTCH2, NDUFA10, ARXES2, MT-ND1, RIMS4, CNST, MPC2, AKT2, LEPR, PRKACA, TMEM38B, CD177, CADPS2, MMGT1, RALGAPA2, PRKCE, SDHD, ACSL3, SDHA, SHISA6, BSCL2, STIM1, TBC1D24, NRN1, EPB41, INSIG1, ATP5O, ATP5L, ATP5B, GRPEL1, BAG1, MAP6, APOD, DRD1, NDUFV2, NDUFV1, SEC31B, HSPA9, CHCHD10, MYO5A, ZWINT, DLG2, SLC6A9, SPIRE1, SNAP25, CHD7, PCSK9, DUSP18, NUDCD3, PIP4P1, SIX4, MLX, KIF1C, YWHAG, S…	514	3089	20051	1.22497	1	0.273157	0.258401
	GOTERM_BP_FAT	GO:0006605~protein targeting	22	3.96396	0.0227014	PEX16, SREBF1, PEX19, KCNB1, VPS13C, NCOA4, TIMM23, ARXES2, DUSP18, TRAK1, TOB1, SORL1, PEX14, PINK1, SAMM50, GRPEL1, PEX3, AKT2, CRY2, APOD, DRD1, YWHAG	514	510	20051	1.68277	1	0.273157	0.258401
	GOTERM_BP_FAT	GO:1901215~negative regulation of neuron death	14	2.52252	0.0228385	GBE1, SOD2, SORL1, HIPK2, PRDX3, GPI1, PINK1, SIX4, PSMC1, BAG1, TBC1D24, GCLM, PPARGC1A, RETREG1	514	271	20051	2.01526	1	0.274109	0.259302
	GOTERM_BP_FAT	GO:0006914~autophagy	20	3.6036	0.0228796	SREBF1, PRKAA2, VPS13C, HUWE1, MYO5A, ZFYVE26, PINK1, NAMPT, ORMDL3, ZKSCAN3, LEPR, ATG2A, VDAC1, EMC6, NUPR1, PPARGC1A, CTSD, S100A9, RETREG1, S100A8	514	448	20051	1.74151	1	0.274109	0.259302
	GOTERM_BP_FAT	GO:0006721~terpenoid metabolic process	7	1.26126	0.0229407	PECR, RBP4, CYP2D22, RDH11, CYP1A1, LSS, FDFT1	514	86	20051	3.17521	1	0.274248	0.259433
	GOTERM_BP_FAT	GO:0065003~macromolecular complex assembly	58	10.4505	0.0233526	SNAP25, ODAD4, GDA, NDUFA10, ATP5G3, CXCL13, MT-ND1, PIP4P1, PSMD4, PSMD5, ME1, LONP1, UQCRFS1, PMEPA1, RAB5IF, TMOD1, CADPS2, DGAT1, GPX4, PDE4D, PRKCE, MRPS2, ACSL3, PRLR, KCTD6, AFG3L2, NDUFS8, UQCRC1, NDUFS2, NDUFS1, NUPR1, ALDOA, NAPA, NDUFB9, COX19, GRB7, EPB41, NDUFB5, INSIG1, KCNA5, HSD17B10, ACACB, ACACA, SAMM50, SEC31B, NDUFA9, TMEM120B, NDUFA6, KCNB1, ADRM1, CHCHD10, MYO5A, SOD2, SORL1…	514	1708	20051	1.32469	1	0.27857	0.263522
	GOTERM_BP_FAT	GO:0071322~cellular response to carbohydrate stimulus	11	1.98198	0.0239665	MLXIPL, PRKAA2, KCNB1, MPC2, LEPR, APOC3, GCLM, PRKACA, PPARGC1A, AACS, MUP3	514	189	20051	2.27041	1	0.284953	0.26956
	GOTERM_BP_FAT	GO:0015908~fatty acid transport	8	1.44144	0.0239907	SLC27A1, PLA2G12A, ABCD3, ACSL1, AKT2, PLIN2, ACSL3, PTGES	514	111	20051	2.81151	1	0.284953	0.26956
	GOTERM_BP_FAT	GO:0097009~energy homeostasis	7	1.26126	0.0241274	MLXIPL, PRKAA2, LEPR, FMO1, ACACB, PPARGC1A, TSKU	514	87	20051	3.13871	1	0.285964	0.270516
	GOTERM_BP_FAT	GO:0045912~negative regulation of carbohydrate metabolic process	6	1.08108	0.0252858	MTCH2, PGP, LEPR, NUPR1, PPARGC1A, MUP3	514	65	20051	3.6009	1	0.299053	0.282898
	GOTERM_BP_FAT	GO:0050871~positive regulation of B cell activation	14	2.52252	0.0253399	IGHV1-82, IGHV1-50, IGHV1-52, IGHV1-11, IGHV1-22, IGHV1-26, IGHG3, IGHV11-2, IGHG2C, IGHG1, IGHA, IGHV5-9, IGLC1, IGHV3-6	514	275	20051	1.98595	1	0.299054	0.282899
	GOTERM_BP_FAT	GO:1901136~carbohydrate derivative catabolic process	10	1.8018	0.0263863	ENTPD4B, NUDT7, GDA, ENTPD5, PDE4D, DPYD, CHIL3, STT3B, FBXO44, CHIL6	514	165	20051	2.36423	1	0.310741	0.293955
	GOTERM_BP_FAT	GO:0006111~regulation of gluconeogenesis	6	1.08108	0.0268035	PGP, LEPR, GPT, ACADM, PDK2, MUP3	514	66	20051	3.54634	1	0.314984	0.297969
	GOTERM_BP_FAT	GO:0010941~regulation of cell death	64	11.5315	0.027296	4930453N24RIK, MTCH2, GBE1, RORC, PCSK9, ENO1, PTMS, GPI1, RASSF2, ALDH2, RASSF3, SIX4, AKT2, CASP3, RASSF6, PIM1, CTSD, PHLDA3, IGFBP3, PRKCE, PRLR, ATAD3A, RNF144B, CDC34, TRAF4, ACOX2, G6PDX, TBC1D24, ACOT1, VDAC1, NUPR1, S100A9, S100A8, LRPAP1, PRKAA2, GLRX, PRDX3, ORMDL3, BAG1, CTNNA1, DRD1, PRODH, PPARGC1A, HSPA9, EGLN3, KCNB1, NTRK3, CIDEA, CHCHD10, DHCR24, FBXO32, SOD2, TPD52L1, SORL1, AT…	514	1935	20051	1.29024	1	0.320092	0.302801
	GOTERM_BP_FAT	GO:0071825~protein-lipid complex subunit organization	5	0.900901	0.0276182	DGAT1, LPCAT3, LIPG, APOC3, ACSL3	514	45	20051	4.33441	1	0.323185	0.305727
	GOTERM_BP_FAT	GO:0071417~cellular response to organonitrogen compound	28	5.04505	0.0278442	SLC27A1, INSIG1, PCSK9, ATP1A3, CIB2, GPT, SLC2A4, ATP5O, AKT2, CASP3, NAMPT, LONP1, CTNNA1, DRD1, ZBTB7B, TMEM38B, PPARGC1A, YWHAG, PDK2, SH2B2, ESRRA, SREBF1, PDE4D, ADRM1, MYO5A, SORL1, PKM, GCLM	514	711	20051	1.53625	1	0.325142	0.307578
	GOTERM_BP_FAT	GO:0030072~peptide hormone secretion	15	2.7027	0.0285631	SREBF1, DGAT1, KCNB1, PRKCE, CHD7, PTGER3, MYO5A, GLRX, MYRIP, AACS, MUP3, RBP4, MPC2, LEPR, PFKM	514	309	20051	1.89368	1	0.332835	0.314855
	GOTERM_BP_FAT	GO:0042181~ketone biosynthetic process	5	0.900901	0.0296568	NDUFA9, COQ8A, COQ9, ALDOA, PPARGC1A	514	46	20051	4.24019	1	0.344854	0.326225
	GOTERM_BP_FAT	GO:0043524~negative regulation of neuron apoptotic process	11	1.98198	0.0297699	PRDX3, GPI1, PINK1, SIX4, GBE1, BAG1, SOD2, GCLM, PPARGC1A, RETREG1, HIPK2	514	196	20051	2.18932	1	0.345443	0.326782
	GOTERM_BP_FAT	GO:0034599~cellular response to oxidative stress	15	2.7027	0.0299104	VKORC1L1, PRKAA2, GLRX, SOD2, PRDX3, PINK1, ALDH2, PRDX1, G6PDX, TBC1D24, LCN2, LONP1, PPARGC1A, PDK2, PDK1	514	311	20051	1.8815	1	0.346347	0.327637
	GOTERM_BP_FAT	GO:0072594~establishment of protein localization to organelle	20	3.6036	0.0301237	PEX16, SREBF1, MTCH2, PEX19, WBP2, VPS13C, NCOA4, TIMM23, ARXES2, DUSP18, TOB1, SORL1, PEX14, PINK1, SAMM50, GRPEL1, PEX3, CRY2, APOD, DRD1	514	463	20051	1.68509	1	0.348089	0.329285
	GOTERM_BP_FAT	GO:0015937~coenzyme A biosynthetic process	3	0.540541	0.0308385	PPCS, PANK1, COASY	514	11	20051	10.639	1	0.355474	0.336271
	GOTERM_BP_FAT	GO:0045838~positive regulation of membrane potential	4	0.720721	0.0308912	TMEM135, AKT2, GLRX, DRD1	514	27	20051	5.77922	1	0.355474	0.336271
	GOTERM_BP_FAT	GO:0072593~reactive oxygen species metabolic process	15	2.7027	0.0312219	RORA, SOD2, MMP8, PRDX3, PINK1, CYB5R3, AKT2, PRDX1, G6PDX, LCN2, CYP1A1, CYCS, VDAC1, NDUFS1, CD177	514	313	20051	1.86948	1	0.357791	0.338463
	GOTERM_BP_FAT	GO:0097193~intrinsic apoptotic signaling pathway	15	2.7027	0.0312219	MTCH2, ENO1, SOD2, HIPK2, PINK1, ALDH2, CASP3, CDIP1, CYCS, NUPR1, S100A9, S100A8, PDK2, PHLDA3, PDK1	514	313	20051	1.86948	1	0.357791	0.338463
	GOTERM_BP_FAT	GO:0001678~cellular glucose homeostasis	11	1.98198	0.0316027	MLXIPL, PRKAA2, KCNB1, MPC2, LEPR, APOC3, GCLM, PRKACA, PPARGC1A, AACS, MUP3	514	198	20051	2.16721	1	0.361407	0.341884
	GOTERM_BP_FAT	GO:0043457~regulation of cellular respiration	5	0.900901	0.0317823	PINK1, CISD1, CYCS, PRKACA, PPARGC1A	514	47	20051	4.14997	1	0.362072	0.342513
	GOTERM_BP_FAT	GO:0090276~regulation of peptide hormone secretion	13	2.34234	0.0317917	SREBF1, KCNB1, PRKCE, CHD7, PTGER3, GLRX, MYRIP, AACS, MUP3, RBP4, MPC2, LEPR, PFKM	514	255	20051	1.98873	1	0.362072	0.342513
	GOTERM_BP_FAT	GO:0015918~sterol transport	8	1.44144	0.0320691	GRAMD1B, STARD5, LPCAT3, LIPG, APOC3, PCSK9, TSKU, ACAT2	514	118	20051	2.64473	1	0.364225	0.34455
	GOTERM_BP_FAT	GO:0007215~glutamate receptor signaling pathway	7	1.26126	0.0321124	PINK1, DAGLA, SLC6A9, KCNB1, ATP1A3, PPARGC1A, SHISA6	514	93	20051	2.93622	1	0.364225	0.34455
	GOTERM_BP_FAT	GO:0046503~glycerolipid catabolic process	6	1.08108	0.0334485	DAGLA, LIPG, DDHD2, APOC3, ABHD5, SORL1	514	70	20051	3.34369	1	0.378604	0.358152
	GOTERM_BP_FAT	GO:0031065~positive regulation of histone deacetylation	4	0.720721	0.033959	SREBF1, PINK1, BC004004, ZBTB7B	514	28	20051	5.57282	1	0.382817	0.362137
	GOTERM_BP_FAT	GO:0051194~positive regulation of cofactor metabolic process	4	0.720721	0.033959	MLXIPL, PRKAA2, SLC6A9, ENTPD5	514	28	20051	5.57282	1	0.382817	0.362137
	GOTERM_BP_FAT	GO:0030001~metal ion transport	34	6.12613	0.0341819	EPB41, CHD7, PTGER3, PCSK9, ATP1A3, KCNA5, GLRX, LPAR3, AKT2, PACSIN3, DRD1, TMEM38B, SCN1B, DMPK, KCNB1, MMGT1, PRKCE, PDE4D, KCNJ15, MYO5A, ATOX1, LETM1, SLC9A2, AFG3L2, SLC6A6, STIM1, SLC6A9, TCN2, HECW2, G6PDX, LCN2, FXYD6, SFXN1, VDAC1	514	924	20051	1.43542	1	0.384547	0.363774
	GOTERM_BP_FAT	GO:0009628~response to abiotic stimulus	47	8.46847	0.0352509	VAC14, SLC27A1, ACADVL, MTCH2, MT-CO1, ATP1A3, RORA, KCNA5, ENO1, SLC2A4, RBM3, GPI1, ACADL, RDH11, AKT2, CASP3, UCP3, NAMPT, PGK1, LONP1, ACADM, DRD1, PRKACA, PPARGC1A, MAP3K4, PDK1, RWDD3, EGLN3, ATP6V1G1, PRKCE, CIDEA, DDHD2, FMO1, SDHD, FBXO32, SOD2, LETM1, RBP4, PINK1, TMEM135, CRY2, BHLHE40, ACOT2, CYP1A1, NDUFS2, MT-CYTB, ALDOA	514	1368	20051	1.34025	1	0.395768	0.374389
	GOTERM_BP_FAT	GO:0033554~cellular response to stress	68	12.2523	0.0354206	VKORC1L1, MTCH2, DIXDC1, PCSK9, RORA, SLC2A4, ENO1, ZFYVE26, RASSF2, ALDH2, CASP3, NAMPT, LONP1, PRKACA, MAP3K6, MAP3K4, PDK2, FADS1, PHLDA3, PDK1, CADPS2, SREBF1, VPS13C, PRKCE, RTN4RL2, SDHD, MMP8, RGMA, TRAF4, G6PDX, TBC1D24, CDIP1, PLIN2, VDAC1, NUPR1, RBM24, PRKAA2, INSIG1, DERL1, GLRX, FBXO44, RECQL4, PRDX3, PRDX1, ZKSCAN3, PGK1, CTNNA1, APOD, ZBTB7B, PPARGC1A, HSPA9, RBM38, RWDD3, EGLN3, N…	514	2106	20051	1.25957	1	0.396868	0.375429
	GOTERM_BP_FAT	GO:0006575~cellular modified amino acid metabolic process	11	1.98198	0.0355038	SULT1A1, EGLN3, SLC27A1, GPX4, PTGES2, CHDH, LPCAT3, G6PDX, MGST2, SOD2, GCLM	514	202	20051	2.12429	1	0.396997	0.375552
	GOTERM_BP_FAT	GO:1900543~negative regulation of purine nucleotide metabolic process	5	0.900901	0.0362949	MLXIPL, MTCH2, APOC3, NUPR1, PPARGC1A	514	49	20051	3.98058	1	0.402028	0.380311
	GOTERM_BP_FAT	GO:0010985~negative regulation of lipoprotein particle clearance	3	0.540541	0.0363896	LRPAP1, APOC3, PCSK9	514	12	20051	9.75243	1	0.402028	0.380311
	GOTERM_BP_FAT	GO:0017085~response to insecticide	3	0.540541	0.0363896	SULT1A1, CYP1A1, SCN1B	514	12	20051	9.75243	1	0.402028	0.380311
	GOTERM_BP_FAT	GO:0015911~plasma membrane long-chain fatty acid transport	3	0.540541	0.0363896	SLC27A1, ACSL1, AKT2	514	12	20051	9.75243	1	0.402028	0.380311
	GOTERM_BP_FAT	GO:1902001~fatty acid transmembrane transport	3	0.540541	0.0363896	SLC27A1, ACSL1, AKT2	514	12	20051	9.75243	1	0.402028	0.380311
	GOTERM_BP_FAT	GO:0009222~pyrimidine ribonucleotide catabolic process	3	0.540541	0.0363896	ENTPD4B, ENTPD5, DPYD	514	12	20051	9.75243	1	0.402028	0.380311
	GOTERM_BP_FAT	GO:0097066~response to thyroid hormone	4	0.720721	0.0371787	KLF9, ATP1A3, GCLM, PPARGC1A	514	29	20051	5.38065	1	0.409113	0.387013
	GOTERM_BP_FAT	GO:0051560~mitochondrial calcium ion homeostasis	4	0.720721	0.0371787	LETM1, AFG3L2, PRKCE, IMMT	514	29	20051	5.38065	1	0.409113	0.387013
	GOTERM_BP_FAT	GO:0046463~acylglycerol biosynthetic process	5	0.900901	0.0386826	SREBF1, SLC27A1, DGAT1, ACSL1, APOC3	514	50	20051	3.90097	1	0.423138	0.40028
	GOTERM_BP_FAT	GO:0045980~negative regulation of nucleotide metabolic process	5	0.900901	0.0386826	MLXIPL, MTCH2, APOC3, NUPR1, PPARGC1A	514	50	20051	3.90097	1	0.423138	0.40028
	GOTERM_BP_FAT	GO:0046460~neutral lipid biosynthetic process	5	0.900901	0.0386826	SREBF1, SLC27A1, DGAT1, ACSL1, APOC3	514	50	20051	3.90097	1	0.423138	0.40028
	GOTERM_BP_FAT	GO:0002790~peptide secretion	20	3.6036	0.0401542	SREBF1, DGAT1, KCNB1, PRKCE, CHD7, PTGER3, MYO5A, GLRX, MYRIP, SORL1, AACS, CYP51, MUP3, RBP4, MPC2, LEPR, ADTRP, S100A9, PFKM, S100A8	514	479	20051	1.6288	1	0.436645	0.413057
	GOTERM_BP_FAT	GO:0006805~xenobiotic metabolic process	8	1.44144	0.0402978	SULT1A1, CYP2D22, ACSL1, CYP1A1, RORC, FMO1, ACAA1B, RORA	514	124	20051	2.51676	1	0.436645	0.413057
	GOTERM_BP_FAT	GO:0008053~mitochondrial fusion	4	0.720721	0.0405487	AFG3L2, CHCHD3, MIGA2, HUWE1	514	30	20051	5.2013	1	0.436645	0.413057
	GOTERM_BP_FAT	GO:0042454~ribonucleoside catabolic process	4	0.720721	0.0405487	ENTPD4B, GDA, ENTPD5, DPYD	514	30	20051	5.2013	1	0.436645	0.413057
	GOTERM_BP_FAT	GO:0034032~purine nucleoside bisphosphate metabolic process	4	0.720721	0.0405487	NUDT7, PPCS, PANK1, COASY	514	30	20051	5.2013	1	0.436645	0.413057
	GOTERM_BP_FAT	GO:0033865~nucleoside bisphosphate metabolic process	4	0.720721	0.0405487	NUDT7, PPCS, PANK1, COASY	514	30	20051	5.2013	1	0.436645	0.413057
	GOTERM_BP_FAT	GO:0033875~ribonucleoside bisphosphate metabolic process	4	0.720721	0.0405487	NUDT7, PPCS, PANK1, COASY	514	30	20051	5.2013	1	0.436645	0.413057
	GOTERM_BP_FAT	GO:0035725~sodium ion transmembrane transport	9	1.62162	0.0406273	SLC9A2, SLC6A6, SLC6A9, HECW2, PCSK9, ATP1A3, FXYD6, GLRX, SCN1B	514	151	20051	2.32508	1	0.436645	0.413057
	GOTERM_BP_FAT	GO:0044236~multicellular organism metabolic process	9	1.62162	0.0406273	LNCBATE1, UCP3, MMP28, PEPD, MMP8, ZBTB7B, SORL1, PPARGC1A, RETREG1	514	151	20051	2.32508	1	0.436645	0.413057
	GOTERM_BP_FAT	GO:0046883~regulation of hormone secretion	15	2.7027	0.0409358	SNAP25, SREBF1, KCNB1, PRKCE, CHD7, PTGER3, GLRX, MYRIP, AACS, MUP3, RBP4, MPC2, CRY2, LEPR, PFKM	514	325	20051	1.80045	1	0.439108	0.415388
	GOTERM_BP_FAT	GO:0009166~nucleotide catabolic process	6	1.08108	0.0410337	ENTPD4B, NUDT7, GDA, ENTPD5, PDE4D, DPYD	514	74	20051	3.16295	1	0.439307	0.415575
	GOTERM_BP_FAT	GO:0006875~cellular metal ion homeostasis	25	4.5045	0.0412555	COX19, CHD7, PTGER3, ATP1A3, CIB2, KCNA5, LPAR3, CXCL13, DRD1, TMEM38B, ATP6V1G1, GLRX3, DMPK, PRKCE, PDE4D, NCOA4, IMMT, RMDN3, MYO5A, ATOX1, LETM1, AFG3L2, STIM1, LCN2, ACO1	514	641	20051	1.52144	1	0.440829	0.417015
	GOTERM_BP_FAT	GO:0072655~establishment of protein localization to mitochondrion	7	1.26126	0.0416445	SREBF1, MTCH2, PINK1, SAMM50, GRPEL1, TIMM23, DUSP18	514	99	20051	2.75826	1	0.44332	0.419372
	GOTERM_BP_FAT	GO:0090087~regulation of peptide transport	26	4.68468	0.0416489	INSIG1, CHD7, PTGER3, GLRX, TOB1, AACS, CNST, AKT2, MPC2, LEPR, APOD, PRKACA, SREBF1, KCNB1, PRKCE, ACSL3, MYRIP, SORL1, CYP51, MUP3, RBP4, PINK1, ADTRP, PFKM, S100A9, S100A8	514	675	20051	1.5026	1	0.44332	0.419372
	GOTERM_BP_FAT	GO:0048871~multicellular organismal homeostasis	20	3.6036	0.0421773	ACADVL, SLC27A1, PRKAA2, PTGER3, CIDEA, FMO1, CIB2, ACACB, ACACA, TSKU, MUP3, MLXIPL, RBP4, ACADL, TMEM79, LEPR, DRD1, SCD1, PPARGC1A, PTGES	514	482	20051	1.61866	1	0.445019	0.420979
	GOTERM_BP_FAT	GO:0034033~purine nucleoside bisphosphate biosynthetic process	3	0.540541	0.0422909	PPCS, PANK1, COASY	514	13	20051	9.00224	1	0.445019	0.420979
	GOTERM_BP_FAT	GO:0033866~nucleoside bisphosphate biosynthetic process	3	0.540541	0.0422909	PPCS, PANK1, COASY	514	13	20051	9.00224	1	0.445019	0.420979
	GOTERM_BP_FAT	GO:0034030~ribonucleoside bisphosphate biosynthetic process	3	0.540541	0.0422909	PPCS, PANK1, COASY	514	13	20051	9.00224	1	0.445019	0.420979
	GOTERM_BP_FAT	GO:0033539~fatty acid beta-oxidation using acyl-CoA dehydrogenase	3	0.540541	0.0422909	ACADVL, ACADL, ACADM	514	13	20051	9.00224	1	0.445019	0.420979
	GOTERM_BP_FAT	GO:1904729~regulation of intestinal lipid absorption	3	0.540541	0.0422909	DGAT1, LPCAT3, ACAT2	514	13	20051	9.00224	1	0.445019	0.420979
	GOTERM_BP_FAT	GO:0042445~hormone metabolic process	12	2.16216	0.0425332	SULT1A1, HSD11B1, RBP4, CYP2D22, DHRS11, RDH11, CYP1A1, HSD17B12, HSD17B10, PPARGC1A, DDO, PCSK4	514	238	20051	1.96688	1	0.445874	0.421788
	GOTERM_BP_FAT	GO:0097305~response to alcohol	12	2.16216	0.0425332	GRAMD1B, SREBF1, RBP4, ALDH2, PRKCE, NTRK3, PMVK, G6PDX, CTNNA1, SLC2A4, SOD2, AACS	514	238	20051	1.96688	1	0.445874	0.421788
	GOTERM_BP_FAT	GO:0003012~muscle system process	19	3.42342	0.0427138	TMOD1, GLRX3, DMPK, PDE4D, PTGER3, ATP1A3, KCNA5, ENO1, FBXO32, BSCL2, SGCA, MYL3, G6PDX, ORMDL3, DRD1, TMEM38B, ALDOA, PPARGC1A, SCN1B	514	451	20051	1.64343	1	0.44692	0.422778
	GOTERM_BP_FAT	GO:0002793~positive regulation of peptide secretion	11	1.98198	0.043116	RBP4, PRKCE, MPC2, LEPR, GLRX, MYRIP, PFKM, SORL1, S100A9, S100A8, AACS	514	209	20051	2.05314	1	0.449429	0.425151
	GOTERM_BP_FAT	GO:0031330~negative regulation of cellular catabolic process	11	1.98198	0.043116	PINK1, NAMPT, ZKSCAN3, LEPR, APOC3, NUPR1, ACACB, SORL1, TOB1, TIMP4, HIPK2	514	209	20051	2.05314	1	0.449429	0.425151
	GOTERM_BP_FAT	GO:0042632~cholesterol homeostasis	7	1.26126	0.0433888	GRAMD1B, INSIG1, LIPG, APOC3, PCSK9, RORA, TSKU	514	100	20051	2.73068	1	0.451422	0.427037
	GOTERM_BP_FAT	GO:1900078~positive regulation of cellular response to insulin stimulus	4	0.720721	0.0440675	ESRRA, MYO5A, ZBTB7B, SORL1	514	31	20051	5.03351	1	0.455063	0.43048
	GOTERM_BP_FAT	GO:0031163~metallo-sulfur cluster assembly	4	0.720721	0.0440675	HSPA9, ISCA1, GLRX3, GLRX5	514	31	20051	5.03351	1	0.455063	0.43048
	GOTERM_BP_FAT	GO:0031649~heat generation	4	0.720721	0.0440675	SLC27A1, PTGER3, MUP3, PTGES	514	31	20051	5.03351	1	0.455063	0.43048
	GOTERM_BP_FAT	GO:0016226~iron-sulfur cluster assembly	4	0.720721	0.0440675	HSPA9, ISCA1, GLRX3, GLRX5	514	31	20051	5.03351	1	0.455063	0.43048
	GOTERM_BP_FAT	GO:0071822~protein complex subunit organization	46	8.28829	0.0442329	NAPA, COX19, SNAP25, NDUFB9, GDA, ODAD4, NDUFB5, NDUFA10, KCNA5, ATP5G3, CXCL13, HSD17B10, ACACB, ACACA, PTMS, MT-ND1, PIP4P1, SAMM50, PSMD4, PSMD5, ME1, LONP1, UQCRFS1, PMEPA1, RAB5IF, TMOD1, NDUFA9, TMEM120B, CADPS2, NDUFA6, GPX4, KCNB1, PRKCE, ADRM1, SOD2, PRLR, SORL1, PEX14, KCTD6, LETM1, NDUFS8, UQCRC1, SPIRE1, NDUFS2, NDUFS1, ALDOA	514	1357	20051	1.32236	1	0.455921	0.431292
	GOTERM_BP_FAT	GO:0055092~sterol homeostasis	7	1.26126	0.0451782	GRAMD1B, INSIG1, LIPG, APOC3, PCSK9, RORA, TSKU	514	101	20051	2.70364	1	0.464798	0.439689
	GOTERM_BP_FAT	GO:0050708~regulation of protein secretion	15	2.7027	0.0456798	SREBF1, KCNB1, PRKCE, PTGER3, GLRX, MYRIP, SORL1, AACS, CYP51, MUP3, RBP4, MPC2, LEPR, ADTRP, PFKM	514	330	20051	1.77317	1	0.469087	0.443747
	GOTERM_BP_FAT	GO:0030003~cellular cation homeostasis	27	4.86486	0.0457781	COX19, CHD7, PTGER3, ATP1A3, CIB2, KCNA5, LPAR3, CXCL13, ATP5B, DRD1, TMEM38B, ATP6V1G1, GLRX3, DMPK, PRKCE, PDE4D, NCOA4, IMMT, RMDN3, MYO5A, ATOX1, LETM1, SLC9A2, AFG3L2, STIM1, LCN2, ACO1	514	713	20051	1.47723	1	0.469226	0.443878
	GOTERM_BP_FAT	GO:0099531~presynaptic process involved in chemical synaptic transmission	10	1.8018	0.0462379	NAPA, CADPS2, SNAP25, RIMS4, NRN1, SLC6A9, PRKCE, DRD1, PRKACA, NAT8L	514	183	20051	2.13168	1	0.473063	0.447508
	GOTERM_BP_FAT	GO:0072523~purine-containing compound catabolic process	5	0.900901	0.0463721	ENTPD4B, NUDT7, GDA, PDE4D, DPYD	514	53	20051	3.68016	1	0.47356	0.447979
	GOTERM_BP_FAT	GO:0050864~regulation of B cell activation	15	2.7027	0.0464689	IGHV1-82, IGHV1-50, IGHV1-52, IGHV1-11, IGHV1-22, IGHV1-26, IGHG3, IGHV11-2, IGHG2C, IGHG1, IGHA, CASP3, IGHV5-9, IGLC1, IGHV3-6	514	331	20051	1.76781	1	0.473675	0.448087
	GOTERM_BP_FAT	GO:0090257~regulation of muscle system process	13	2.34234	0.0469497	GLRX3, DMPK, PDE4D, PTGER3, ENO1, FBXO32, BSCL2, SGCA, MYL3, G6PDX, ORMDL3, TMEM38B, PPARGC1A	514	271	20051	1.87132	1	0.476587	0.450842
	GOTERM_BP_FAT	GO:1905039~carboxylic acid transmembrane transport	7	1.26126	0.0470129	SLC6A6, SLC27A1, RBP4, SLC36A2, ACSL1, AKT2, SLC25A10	514	102	20051	2.67714	1	0.476587	0.450842
	GOTERM_BP_FAT	GO:0002028~regulation of sodium ion transport	7	1.26126	0.0470129	DMPK, AKT2, HECW2, PCSK9, FXYD6, GLRX, SCN1B	514	102	20051	2.67714	1	0.476587	0.450842
	GOTERM_BP_FAT	GO:0019748~secondary metabolic process	6	1.08108	0.0473523	HSD11B1, CYP2D22, PGAM1, CYP1A1, FMO1, MYO5A	514	77	20051	3.03972	1	0.47915	0.453266
	GOTERM_BP_FAT	GO:0002082~regulation of oxidative phosphorylation	4	0.720721	0.0477332	MLXIPL, PINK1, APOC3, NUPR1	514	32	20051	4.87622	1	0.481195	0.4552
	GOTERM_BP_FAT	GO:0051181~cofactor transport	4	0.720721	0.0477332	SLC25A48, SLC27A1, PGRMC2, SLC25A19	514	32	20051	4.87622	1	0.481195	0.4552
	GOTERM_BP_FAT	GO:0046879~hormone secretion	17	3.06306	0.0478489	SNAP25, SREBF1, DGAT1, KCNB1, PRKCE, CHD7, PTGER3, MYO5A, GLRX, MYRIP, AACS, MUP3, RBP4, MPC2, CRY2, LEPR, PFKM	514	394	20051	1.68316	1	0.481195	0.4552
	GOTERM_BP_FAT	GO:1903530~regulation of secretion by cell	27	4.86486	0.0479762	NAPA, SNAP25, NRN1, CHD7, PTGER3, GLRX, AACS, RIMS4, MPC2, LEPR, DRD1, CD177, CADPS2, SREBF1, KCNB1, PRKCE, MYO5A, SDHD, MYRIP, SORL1, CYP51, MUP3, RBP4, PINK1, CRY2, ADTRP, PFKM	514	717	20051	1.46899	1	0.481195	0.4552
	GOTERM_BP_FAT	GO:0007626~locomotory behavior	13	2.34234	0.047989	TMOD1, SNAP25, PRKCE, CHD7, DDHD2, ATP1A3, MYO5A, SOD2, MUP3, HIPK2, GPRC5B, LEPR, DRD1	514	272	20051	1.86444	1	0.481195	0.4552
	GOTERM_BP_FAT	GO:0051247~positive regulation of protein metabolic process	59	10.6306	0.0484693	KLB, SLC27A1, MTCH2, RNF14, RMND1, DIXDC1, PCSK9, ENO1, PTMS, RBM3, RASSF2, AKT2, CASP3, PIM1, LEPR, MAP3K6, CTSD, MAP3K4, SREBF1, ACSL1, IGFBP3, PDE4D, PRKCE, PPP2R5A, MMP8, PRLR, RGMA, RNF144B, GPRC5B, PKM, TRAF4, HECW2, ADTRP, NUPR1, S100A9, S100A8, TRUB2, PRKAA2, WBP2, PTGER3, DERL1, LPAR3, PACSIN3, DRD1, ZBTB7B, RILP, RWDD3, EGLN3, NTRK3, HUWE1, TPD52L1, SORL1, HIPK2, TADA2B, PINK1, SLC6A9, …	514	1823	20051	1.26252	1	0.483898	0.457758
	GOTERM_BP_FAT	GO:0009437~carnitine metabolic process	3	0.540541	0.0485209	ACADL, ACADM, CRAT	514	14	20051	8.35923	1	0.483898	0.457758
	GOTERM_BP_FAT	GO:1902510~regulation of apoptotic DNA fragmentation	3	0.540541	0.0485209	IGFBP3, CASP3, CIDEA	514	14	20051	8.35923	1	0.483898	0.457758
	GOTERM_BP_FAT	GO:0045913~positive regulation of carbohydrate metabolic process	7	1.26126	0.0488932	MLXIPL, PRKAA2, PRKCE, ENTPD5, AKT2, GPT, MUP3	514	103	20051	2.65115	1	0.48586	0.459614
	GOTERM_BP_FAT	GO:1903825~organic acid transmembrane transport	7	1.26126	0.0488932	SLC6A6, SLC27A1, RBP4, SLC36A2, ACSL1, AKT2, SLC25A10	514	103	20051	2.65115	1	0.48586	0.459614
	GOTERM_BP_FAT	GO:0050851~antigen receptor-mediated signaling pathway	16	2.88288	0.0491827	IGHV1-82, IGHV1-50, IGHV1-52, PDE4D, IGHV1-11, IGHV1-22, IGHV1-26, IGHG3, IGHV11-2, IGHG2C, IGHG1, IGHA, IGHV5-9, IGLC1, IGHV3-6, SH2B2	514	364	20051	1.71471	1	0.487861	0.461507
	GOTERM_BP_FAT	GO:0055080~cation homeostasis	30	5.40541	0.049743	COX19, CHD7, PTGER3, ATP1A3, CIB2, KCNA5, LPAR3, CXCL13, ATP5B, DRD1, TMEM38B, PDK2, ATP6V1G1, GLRX3, DMPK, PRKCE, PDE4D, NCOA4, IMMT, RMDN3, MYO5A, SOD2, ATOX1, LETM1, SLC9A2, AFG3L2, STIM1, LCN2, ACO1, ANK	514	819	20051	1.42893	1	0.492536	0.465929
	GOTERM_BP_FAT	GO:0043270~positive regulation of ion transport	16	2.88288	0.0504916	SLC36A2, ATP8A1, ACSL1, MYO5A, GLRX, LPAR3, PINK1, STIM1, SLC6A9, AKT2, G6PDX, LCN2, DRD1, NAT8L, SCN1B, PTGES	514	366	20051	1.70534	1	0.495757	0.468976
	GOTERM_BP_FAT	GO:1905089~regulation of parkin-mediated stimulation of mitophagy in response to mitochondrial depolarization	2	0.36036	0.0505162	VPS13C, VDAC1	514	2	20051	39.0097	1	0.495757	0.468976
	GOTERM_BP_FAT	GO:2001295~malonyl-CoA biosynthetic process	2	0.36036	0.0505162	ACACB, ACACA	514	2	20051	39.0097	1	0.495757	0.468976
	GOTERM_BP_FAT	GO:0006850~mitochondrial pyruvate transport	2	0.36036	0.0505162	MPC1, MPC2	514	2	20051	39.0097	1	0.495757	0.468976
	GOTERM_BP_FAT	GO:0014853~regulation of excitatory postsynaptic membrane potential involved in skeletal muscle contraction	2	0.36036	0.0505162	BSCL2, DMPK	514	2	20051	39.0097	1	0.495757	0.468976
	GOTERM_BP_FAT	GO:0045454~cell redox homeostasis	4	0.720721	0.0515436	PRDX3, GLRX3, PRDX1, DLD	514	33	20051	4.72845	1	0.503163	0.475983
	GOTERM_BP_FAT	GO:0036296~response to increased oxygen levels	4	0.720721	0.0515436	ATP6V1G1, CYP1A1, KCNA5, SOD2	514	33	20051	4.72845	1	0.503163	0.475983
	GOTERM_BP_FAT	GO:0009164~nucleoside catabolic process	4	0.720721	0.0515436	ENTPD4B, GDA, ENTPD5, DPYD	514	33	20051	4.72845	1	0.503163	0.475983
	GOTERM_BP_FAT	GO:0090277~positive regulation of peptide hormone secretion	8	1.44144	0.053248	RBP4, PRKCE, MPC2, LEPR, GLRX, MYRIP, PFKM, AACS	514	132	20051	2.36423	1	0.518887	0.490857
	GOTERM_BP_FAT	GO:0071407~cellular response to organic cyclic compound	26	4.68468	0.0535263	GRAMD1B, RNF14, WBP2, INSIG1, PTGER3, RORC, CIB2, RORA, GLRX, ATP5O, AACS, RBM3, AKT2, CASP3, PIM1, CTNNA1, DRD1, TMEM38B, PPARGC1A, PDE4D, FBXO32, KLF9, CRY2, CYP1A1, ADTRP, GCLM	514	690	20051	1.46993	1	0.520682	0.492555
	GOTERM_BP_FAT	GO:0071380~cellular response to prostaglandin E stimulus	3	0.540541	0.0550591	PRKAA2, PRKCE, ACACA	514	15	20051	7.80195	1	0.532735	0.503957
	GOTERM_BP_FAT	GO:0046133~pyrimidine ribonucleoside catabolic process	3	0.540541	0.0550591	ENTPD4B, ENTPD5, DPYD	514	15	20051	7.80195	1	0.532735	0.503957
	GOTERM_BP_FAT	GO:0046135~pyrimidine nucleoside catabolic process	3	0.540541	0.0550591	ENTPD4B, ENTPD5, DPYD	514	15	20051	7.80195	1	0.532735	0.503957
	GOTERM_BP_FAT	GO:0010942~positive regulation of cell death	28	5.04505	0.0551504	4930453N24RIK, MTCH2, PCSK9, RASSF2, CASP3, RASSF6, CTNNA1, PRODH, PPARGC1A, CTSD, PHLDA3, EGLN3, IGFBP3, NTRK3, CHCHD10, FBXO32, TPD52L1, SOD2, ADCY10, SLC6A6, PINK1, CDC34, ACOX2, LCN2, CYCS, NUPR1, S100A9, S100A8	514	760	20051	1.4372	1	0.532735	0.503957
	GOTERM_BP_FAT	GO:0015872~dopamine transport	4	0.720721	0.0554965	PINK1, MYO5A, DRD1, NAT8L	514	34	20051	4.58938	1	0.534214	0.505356
	GOTERM_BP_FAT	GO:0009218~pyrimidine ribonucleotide metabolic process	4	0.720721	0.0554965	ENTPD4B, UCK1, ENTPD5, DPYD	514	34	20051	4.58938	1	0.534214	0.505356
	GOTERM_BP_FAT	GO:0098771~inorganic ion homeostasis	30	5.40541	0.0557045	COX19, CHD7, PTGER3, ATP1A3, CIB2, KCNA5, LPAR3, CXCL13, ATP5B, DRD1, TMEM38B, PDK2, ATP6V1G1, GLRX3, DMPK, PRKCE, PDE4D, NCOA4, IMMT, RMDN3, MYO5A, SOD2, ATOX1, LETM1, SLC9A2, AFG3L2, STIM1, LCN2, ACO1, ANK	514	831	20051	1.40829	1	0.535285	0.506369
	GOTERM_BP_FAT	GO:0043933~macromolecular complex subunit organization	62	11.1712	0.0564846	SNAP25, ODAD4, GDA, NDUFA10, ATP5G3, CXCL13, MT-ND1, PTMS, PIP4P1, PSMD4, PSMD5, LIPG, ME1, LONP1, UQCRFS1, PMEPA1, RAB5IF, TMOD1, CADPS2, DGAT1, GPX4, PDE4D, PRKCE, MRPS2, ACSL3, PRLR, KCTD6, AFG3L2, NDUFS8, UQCRC1, NDUFS2, NDUFS1, NUPR1, ALDOA, NAPA, NDUFB9, COX19, GRB7, EPB41, NDUFB5, INSIG1, KCNA5, HSD17B10, ACACB, ACACA, SAMM50, SEC31B, NDUFA9, TMEM120B, NDUFA6, KCNB1, ADRM1, CHCHD10, APOC3,…	514	1945	20051	1.2435	1	0.541841	0.51257
	GOTERM_BP_FAT	GO:0070201~regulation of establishment of protein localization	25	4.5045	0.0572736	SNAP25, INSIG1, PTGER3, GLRX, TOB1, AACS, CNST, AKT2, MPC2, LEPR, APOD, PRKACA, CTSD, SREBF1, KCNB1, PRKCE, ACSL3, MYRIP, SORL1, CYP51, MUP3, RBP4, PINK1, ADTRP, PFKM	514	664	20051	1.46874	1	0.548459	0.518832
	GOTERM_BP_FAT	GO:0006873~cellular ion homeostasis	27	4.86486	0.0578319	COX19, CHD7, PTGER3, ATP1A3, CIB2, KCNA5, LPAR3, CXCL13, ATP5B, DRD1, TMEM38B, ATP6V1G1, GLRX3, DMPK, PRKCE, PDE4D, NCOA4, IMMT, RMDN3, MYO5A, ATOX1, LETM1, SLC9A2, AFG3L2, STIM1, LCN2, ACO1	514	731	20051	1.44085	1	0.552051	0.52223
	GOTERM_BP_FAT	GO:0031103~axon regeneration	5	0.900901	0.0578482	NTRK3, CTNNA1, APOD, RTN4RL2, RGMA	514	57	20051	3.42191	1	0.552051	0.52223
	GOTERM_BP_FAT	GO:0009914~hormone transport	17	3.06306	0.0583347	SNAP25, SREBF1, DGAT1, KCNB1, PRKCE, CHD7, PTGER3, MYO5A, GLRX, MYRIP, AACS, MUP3, RBP4, MPC2, CRY2, LEPR, PFKM	514	405	20051	1.63745	1	0.554781	0.524812
	GOTERM_BP_FAT	GO:0002429~immune response-activating cell surface receptor signaling pathway	17	3.06306	0.0583347	IGHV1-82, IGHV1-50, IGHV1-52, PDE4D, IGHV1-11, IGHV1-22, IGHV1-26, IGHG3, IGHV11-2, IGHG2C, IGHG1, IGHA, IGHV5-9, IGLC1, MASP1, IGHV3-6, SH2B2	514	405	20051	1.63745	1	0.554781	0.524812
	GOTERM_BP_FAT	GO:0046916~cellular transition metal ion homeostasis	7	1.26126	0.0589827	COX19, ATP6V1G1, GLRX3, NCOA4, LCN2, ACO1, ATOX1	514	108	20051	2.52841	1	0.559982	0.529732
	GOTERM_BP_FAT	GO:0051047~positive regulation of secretion	18	3.24324	0.0597096	SNAP25, CADPS2, KCNB1, PRKCE, GLRX, MYRIP, ACSL3, SORL1, AACS, RBP4, PINK1, MPC2, LEPR, S100A9, PFKM, S100A8, PTGES, CD177	514	438	20051	1.60314	1	0.565912	0.535341
	GOTERM_BP_FAT	GO:0044058~regulation of digestive system process	5	0.900901	0.0609334	DGAT1, EPB41, LPCAT3, PTGER3, ACAT2	514	58	20051	3.36291	1	0.576524	0.54538
	GOTERM_BP_FAT	GO:1901292~nucleoside phosphate catabolic process	6	1.08108	0.0616259	ENTPD4B, NUDT7, GDA, ENTPD5, PDE4D, DPYD	514	83	20051	2.81998	1	0.577634	0.54643
	GOTERM_BP_FAT	GO:0055089~fatty acid homeostasis	3	0.540541	0.0618856	MLXIPL, PRKAA2, DGAT1	514	16	20051	7.31432	1	0.577634	0.54643
	GOTERM_BP_FAT	GO:0019321~pentose metabolic process	3	0.540541	0.0618856	CBR2, G6PDX, PGD	514	16	20051	7.31432	1	0.577634	0.54643
	GOTERM_BP_FAT	GO:1903624~regulation of DNA catabolic process	3	0.540541	0.0618856	IGFBP3, CASP3, CIDEA	514	16	20051	7.31432	1	0.577634	0.54643
	GOTERM_BP_FAT	GO:0006244~pyrimidine nucleotide catabolic process	3	0.540541	0.0618856	ENTPD4B, ENTPD5, DPYD	514	16	20051	7.31432	1	0.577634	0.54643
	GOTERM_BP_FAT	GO:0031650~regulation of heat generation	3	0.540541	0.0618856	SLC27A1, PTGER3, PTGES	514	16	20051	7.31432	1	0.577634	0.54643
	GOTERM_BP_FAT	GO:0018119~peptidyl-cysteine S-nitrosylation	3	0.540541	0.0618856	TBC1D24, S100A9, S100A8	514	16	20051	7.31432	1	0.577634	0.54643
	GOTERM_BP_FAT	GO:0006744~ubiquinone biosynthetic process	3	0.540541	0.0618856	NDUFA9, COQ8A, COQ9	514	16	20051	7.31432	1	0.577634	0.54643
	GOTERM_BP_FAT	GO:0051209~release of sequestered calcium ion into cytosol	7	1.26126	0.0633413	LETM1, PRKCE, PDE4D, CHD7, MYO5A, DRD1, TMEM38B	514	110	20051	2.48244	1	0.589234	0.557404
	GOTERM_BP_FAT	GO:0030301~cholesterol transport	7	1.26126	0.0633413	STARD5, LPCAT3, LIPG, APOC3, PCSK9, TSKU, ACAT2	514	110	20051	2.48244	1	0.589234	0.557404
	GOTERM_BP_FAT	GO:0042178~xenobiotic catabolic process	4	0.720721	0.0638198	CYP2D22, ACSL1, CYP1A1, ACAA1B	514	36	20051	4.33441	1	0.590812	0.558897
	GOTERM_BP_FAT	GO:0090312~positive regulation of protein deacetylation	4	0.720721	0.0638198	SREBF1, PINK1, BC004004, ZBTB7B	514	36	20051	4.33441	1	0.590812	0.558897
	GOTERM_BP_FAT	GO:0055065~metal ion homeostasis	27	4.86486	0.0638312	COX19, CHD7, PTGER3, ATP1A3, CIB2, KCNA5, LPAR3, CXCL13, DRD1, TMEM38B, ATP6V1G1, GLRX3, DMPK, PRKCE, PDE4D, NCOA4, IMMT, RMDN3, MYO5A, SOD2, ATOX1, LETM1, AFG3L2, STIM1, LCN2, ACO1, ANK	514	740	20051	1.42333	1	0.590812	0.558897
	GOTERM_BP_FAT	GO:0000302~response to reactive oxygen species	12	2.16216	0.0643248	PRDX3, PINK1, UCP3, PRDX1, CASP3, LCN2, APOD, KCNA5, GLRX, SOD2, PPARGC1A, PDK2	514	255	20051	1.83575	1	0.594387	0.562278
	GOTERM_BP_FAT	GO:1903409~reactive oxygen species biosynthetic process	8	1.44144	0.0644947	CYB5R3, AKT2, LCN2, CYP1A1, CYCS, RORA, SOD2, MMP8	514	138	20051	2.26143	1	0.594964	0.562824
	GOTERM_BP_FAT	GO:0051283~negative regulation of sequestering of calcium ion	7	1.26126	0.0655899	LETM1, PRKCE, PDE4D, CHD7, MYO5A, DRD1, TMEM38B	514	111	20051	2.46007	1	0.60406	0.571429
	GOTERM_BP_FAT	GO:0046474~glycerophospholipid biosynthetic process	8	1.44144	0.0664988	VAC14, SLC27A1, PCYT2, LPCAT3, CHPT1, ACSL3, ABHD5, AGPAT2	514	139	20051	2.24516	1	0.611414	0.578385
	GOTERM_BP_FAT	GO:0006749~glutathione metabolic process	6	1.08108	0.0668684	GPX4, PTGES2, G6PDX, MGST2, SOD2, GCLM	514	85	20051	2.75363	1	0.613792	0.580635
	GOTERM_BP_FAT	GO:0045599~negative regulation of fat cell differentiation	5	0.900901	0.0673596	ZADH2, INSIG1, RORA, SOD2, TLCD3B	514	60	20051	3.25081	1	0.614214	0.581034
	GOTERM_BP_FAT	GO:2000649~regulation of sodium ion transmembrane transporter activity	5	0.900901	0.0673596	HECW2, PCSK9, FXYD6, GLRX, SCN1B	514	60	20051	3.25081	1	0.614214	0.581034
	GOTERM_BP_FAT	GO:0042743~hydrogen peroxide metabolic process	5	0.900901	0.0673596	PRDX3, PRDX1, CYP1A1, CYCS, SOD2	514	60	20051	3.25081	1	0.614214	0.581034
	GOTERM_BP_FAT	GO:0007568~aging	17	3.06306	0.0675127	SREBF1, GPX4, MT-CO1, PDE4D, SOD2, TMEM135, UCP3, NAMPT, CTNNA1, ZKSCAN3, CYP1A1, LONP1, APOD, GCLM, DLD, PPARGC1A, FADS1	514	414	20051	1.60185	1	0.614214	0.581034
	GOTERM_BP_FAT	GO:0009306~protein secretion	17	3.06306	0.0675127	SREBF1, DGAT1, KCNB1, PRKCE, PTGER3, MYO5A, GLRX, MYRIP, SORL1, AACS, CYP51, MUP3, RBP4, MPC2, LEPR, ADTRP, PFKM	514	414	20051	1.60185	1	0.614214	0.581034
	GOTERM_BP_FAT	GO:0006508~proteolysis	58	10.4505	0.0675802	MTCH2, RNF14, PCSK9, LDLRAD3, ARXES2, ENO1, PEPD, PCSK4, GPI1, PSMD4, AKT2, CASP3, PSMD3, LONP1, PRKACA, CTSD, TIMP4, MMP8, KCTD6, RGMA, PSMA6, AFG3L2, RNF144B, CDC34, NGP, HECW2, MASP1, UQCRC2, NUPR1, DLD, S100A9, S100A8, PSMD12, MINDY2, DERL1, UBR3, TRHDE, FBXO44, PSMB3, PCBP2, PGK1, PACSIN3, RCE1, EGLN3, USP20, ADRM1, HUWE1, SERPINA3K, DHCR24, SORL1, HIPK2, SERPINA3J, TADA2B, CAPN11, LPCAT3, P…	514	1826	20051	1.23908	1	0.614214	0.581034
	GOTERM_BP_FAT	GO:0046131~pyrimidine ribonucleoside metabolic process	4	0.720721	0.068185	ENTPD4B, UCK1, ENTPD5, DPYD	514	37	20051	4.21727	1	0.618695	0.585273
	GOTERM_BP_FAT	GO:0055076~transition metal ion homeostasis	8	1.44144	0.0685402	COX19, ATP6V1G1, GLRX3, NCOA4, LCN2, ACO1, SOD2, ATOX1	514	140	20051	2.22913	1	0.619826	0.586343
	GOTERM_BP_FAT	GO:0043248~proteasome assembly	3	0.540541	0.0689815	PSMD4, PSMD5, ADRM1	514	17	20051	6.88407	1	0.619826	0.586343
	GOTERM_BP_FAT	GO:1901663~quinone biosynthetic process	3	0.540541	0.0689815	NDUFA9, COQ8A, COQ9	514	17	20051	6.88407	1	0.619826	0.586343
	GOTERM_BP_FAT	GO:0017014~protein nitrosylation	3	0.540541	0.0689815	TBC1D24, S100A9, S100A8	514	17	20051	6.88407	1	0.619826	0.586343
	GOTERM_BP_FAT	GO:0045820~negative regulation of glycolytic process	3	0.540541	0.0689815	MTCH2, NUPR1, PPARGC1A	514	17	20051	6.88407	1	0.619826	0.586343
	GOTERM_BP_FAT	GO:0010896~regulation of triglyceride catabolic process	3	0.540541	0.0689815	APOC3, ABHD5, SORL1	514	17	20051	6.88407	1	0.619826	0.586343
	GOTERM_BP_FAT	GO:0051279~regulation of release of sequestered calcium ion into cytosol	6	1.08108	0.06958	PRKCE, PDE4D, CHD7, MYO5A, DRD1, TMEM38B	514	86	20051	2.72161	1	0.62419	0.590472
	GOTERM_BP_FAT	GO:0002768~immune response-regulating cell surface receptor signaling pathway	17	3.06306	0.0703361	IGHV1-82, IGHV1-50, IGHV1-52, PDE4D, IGHV1-11, IGHV1-22, IGHV1-26, IGHG3, IGHV11-2, IGHG2C, IGHG1, IGHA, IGHV5-9, IGLC1, MASP1, IGHV3-6, SH2B2	514	417	20051	1.59032	1	0.629952	0.595922
	GOTERM_BP_FAT	GO:0071398~cellular response to fatty acid	5	0.900901	0.0706992	SREBF1, PRKAA2, PRKCE, PPARGC1A, ACACA	514	61	20051	3.19752	1	0.632181	0.598031
	GOTERM_BP_FAT	GO:0034381~plasma lipoprotein particle clearance	4	0.720721	0.0726819	LRPAP1, LIPG, APOC3, PCSK9	514	38	20051	4.10629	1	0.646776	0.611837
	GOTERM_BP_FAT	GO:0042398~cellular modified amino acid biosynthetic process	4	0.720721	0.0726819	SLC27A1, CHDH, MGST2, GCLM	514	38	20051	4.10629	1	0.646776	0.611837
	GOTERM_BP_FAT	GO:0030431~sleep	4	0.720721	0.0726819	SNAP25, PTGER3, DRD1, DLAT	514	38	20051	4.10629	1	0.646776	0.611837
	GOTERM_BP_FAT	GO:0043065~positive regulation of apoptotic process	25	4.5045	0.073002	4930453N24RIK, MTCH2, PCSK9, RASSF2, CASP3, RASSF6, CTNNA1, PPARGC1A, CTSD, PHLDA3, EGLN3, IGFBP3, NTRK3, CHCHD10, FBXO32, TPD52L1, SOD2, ADCY10, PINK1, CDC34, LCN2, CYCS, NUPR1, S100A9, S100A8	514	683	20051	1.42788	1	0.648581	0.613545
	GOTERM_BP_FAT	GO:0006936~muscle contraction	14	2.52252	0.0744043	TMOD1, DMPK, PDE4D, PTGER3, ATP1A3, KCNA5, ENO1, BSCL2, MYL3, ORMDL3, DRD1, TMEM38B, ALDOA, SCN1B	514	324	20051	1.68561	1	0.650045	0.614929
	GOTERM_BP_FAT	GO:0006011~UDP-glucose metabolic process	2	0.36036	0.0748109	UGP2, ENTPD5	514	3	20051	26.0065	1	0.650045	0.614929
	GOTERM_BP_FAT	GO:1903991~positive regulation of ferrous iron import into cell	2	0.36036	0.0748109	SLC6A9, LCN2	514	3	20051	26.0065	1	0.650045	0.614929
	GOTERM_BP_FAT	GO:1903852~positive regulation of cristae formation	2	0.36036	0.0748109	PINK1, CHCHD10	514	3	20051	26.0065	1	0.650045	0.614929
	GOTERM_BP_FAT	GO:0019322~pentose biosynthetic process	2	0.36036	0.0748109	G6PDX, PGD	514	3	20051	26.0065	1	0.650045	0.614929
	GOTERM_BP_FAT	GO:2000640~positive regulation of SREBP signaling pathway	2	0.36036	0.0748109	LPCAT3, ZBTB7B	514	3	20051	26.0065	1	0.650045	0.614929
	GOTERM_BP_FAT	GO:0034761~positive regulation of iron ion transmembrane transport	2	0.36036	0.0748109	SLC6A9, LCN2	514	3	20051	26.0065	1	0.650045	0.614929
	GOTERM_BP_FAT	GO:0010133~proline catabolic process to glutamate	2	0.36036	0.0748109	ALDH4A1, PRODH	514	3	20051	26.0065	1	0.650045	0.614929
	GOTERM_BP_FAT	GO:0014852~regulation of skeletal muscle contraction by neural stimulation via neuromuscular junction	2	0.36036	0.0748109	BSCL2, DMPK	514	3	20051	26.0065	1	0.650045	0.614929
	GOTERM_BP_FAT	GO:1904440~positive regulation of ferrous iron import across plasma membrane	2	0.36036	0.0748109	SLC6A9, LCN2	514	3	20051	26.0065	1	0.650045	0.614929
	GOTERM_BP_FAT	GO:0032788~saturated monocarboxylic acid metabolic process	2	0.36036	0.0748109	ACOT4, ACOT3	514	3	20051	26.0065	1	0.650045	0.614929
	GOTERM_BP_FAT	GO:0034758~positive regulation of iron ion transport	2	0.36036	0.0748109	SLC6A9, LCN2	514	3	20051	26.0065	1	0.650045	0.614929
	GOTERM_BP_FAT	GO:0019287~isopentenyl diphosphate biosynthetic process, mevalonate pathway	2	0.36036	0.0748109	PMVK, MVD	514	3	20051	26.0065	1	0.650045	0.614929
	GOTERM_BP_FAT	GO:0032789~unsaturated monocarboxylic acid metabolic process	2	0.36036	0.0748109	ACOT4, ACOT3	514	3	20051	26.0065	1	0.650045	0.614929
	GOTERM_BP_FAT	GO:0007029~endoplasmic reticulum organization	6	1.08108	0.0751827	MMGT1, LPCAT3, EMC6, TMEM38B, RETREG1, SEC31B	514	88	20051	2.65975	1	0.650511	0.615371
	GOTERM_BP_FAT	GO:0055081~anion homeostasis	6	1.08108	0.0751827	MLXIPL, PRKAA2, DGAT1, LIPG, TLCD1, ANK	514	88	20051	2.65975	1	0.650511	0.615371
	GOTERM_BP_FAT	GO:0043068~positive regulation of programmed cell death	25	4.5045	0.0752172	4930453N24RIK, MTCH2, PCSK9, RASSF2, CASP3, RASSF6, CTNNA1, PPARGC1A, CTSD, PHLDA3, EGLN3, IGFBP3, NTRK3, CHCHD10, FBXO32, TPD52L1, SOD2, ADCY10, PINK1, CDC34, LCN2, CYCS, NUPR1, S100A9, S100A8	514	688	20051	1.4175	1	0.650511	0.615371
	GOTERM_BP_FAT	GO:0044802~single-organism membrane organization	30	5.40541	0.0762922	SNAP25, MTCH2, ATP8A1, MTFP1, APOO, CHCHD3, SAMM50, CNST, AKT2, PACSIN3, EMC6, MIGA2, DMPK, KCNB1, MMGT1, HUWE1, CHCHD10, IMMT, PPP2R5A, MYO5A, ACSL3, SHISA6, LETM1, AFG3L2, PINK1, DLG2, RILPL2, LPCAT3, TLCD1, S100A9	514	854	20051	1.37037	1	0.656023	0.620585
	GOTERM_BP_FAT	GO:0051198~negative regulation of coenzyme metabolic process	3	0.540541	0.0763286	MTCH2, NUPR1, PPARGC1A	514	18	20051	6.50162	1	0.656023	0.620585
	GOTERM_BP_FAT	GO:0006851~mitochondrial calcium ion transport	3	0.540541	0.0763286	LETM1, AFG3L2, VDAC1	514	18	20051	6.50162	1	0.656023	0.620585
	GOTERM_BP_FAT	GO:0051195~negative regulation of cofactor metabolic process	3	0.540541	0.0763286	MTCH2, NUPR1, PPARGC1A	514	18	20051	6.50162	1	0.656023	0.620585
	GOTERM_BP_FAT	GO:0033365~protein localization to organelle	32	5.76577	0.0770616	MTCH2, PRKAA2, WBP2, INSIG1, ARXES2, DUSP18, TOB1, NUDCD3, SAMM50, GRPEL1, SIX4, BAG1, ORMDL3, CTNNA1, APOD, EMC6, DRD1, PRKACA, PEX16, SREBF1, PEX19, MMGT1, VPS13C, NCOA4, CHCHD10, TIMM23, SORL1, PEX14, PINK1, DLG2, PEX3, CRY2	514	925	20051	1.34953	1	0.660408	0.624733
	GOTERM_BP_FAT	GO:0051238~sequestering of metal ion	8	1.44144	0.0770775	LETM1, PRKCE, PDE4D, CHD7, LCN2, MYO5A, DRD1, TMEM38B	514	144	20051	2.16721	1	0.660408	0.624733
	GOTERM_BP_FAT	GO:0009712~catechol-containing compound metabolic process	5	0.900901	0.0776274	SULT1A1, CYP2D22, ALDH2, MYO5A, DRD1	514	63	20051	3.09601	1	0.663068	0.627249
	GOTERM_BP_FAT	GO:0006584~catecholamine metabolic process	5	0.900901	0.0776274	SULT1A1, CYP2D22, ALDH2, MYO5A, DRD1	514	63	20051	3.09601	1	0.663068	0.627249
	GOTERM_BP_FAT	GO:0051260~protein homooligomerization	10	1.8018	0.0778112	LETM1, KCNB1, ME1, KCNA5, SOD2, ALDOA, ACACB, HSD17B10, KCTD6, ACACA	514	203	20051	1.92166	1	0.663613	0.627765
	GOTERM_BP_FAT	GO:0051937~catecholamine transport	6	1.08108	0.0780732	PINK1, KCNB1, PTGER3, MYO5A, DRD1, NAT8L	514	89	20051	2.62987	1	0.664823	0.628909
	GOTERM_BP_FAT	GO:0046887~positive regulation of hormone secretion	9	1.62162	0.0811734	SNAP25, RBP4, PRKCE, MPC2, LEPR, GLRX, MYRIP, PFKM, AACS	514	175	20051	2.00621	1	0.689103	0.651877
	GOTERM_BP_FAT	GO:0045471~response to ethanol	9	1.62162	0.0811734	SREBF1, RBP4, ALDH2, PRKCE, NTRK3, G6PDX, SLC2A4, SOD2, AACS	514	175	20051	2.00621	1	0.689103	0.651877
	GOTERM_BP_FAT	GO:0070887~cellular response to chemical stimulus	104	18.7387	0.0813304	KLB, VKORC1L1, SLC27A1, RORC, CIB2, RORA, ENO1, CXCL13, TSKU, MPC1, MPC2, AKT2, NAMPT, PIM1, LONP1, LEPR, PRKACA, TMEM38B, PDK2, PDK1, IL15RA, ATP6V1G1, ACSL1, PRKCE, SDHD, PRLR, CDC34, CYP2D22, TBC1D24, CDIP1, ADTRP, S100A9, S100A8, INSIG1, ATP5O, ACACA, SULT1A1, PRDX3, ATP5B, PRDX1, PGK1, ST3GAL6, DRD1, ZBTB7B, PPARGC1A, ESRRA, HSPA9, PMM1, CIDEA, MYO5A, FBXO32, ADCY10, MLXIPL, DLG2, FASN, CYP1…	514	3538	20051	1.1467	1	0.689378	0.652138
	GOTERM_BP_FAT	GO:0009636~response to toxic substance	9	1.62162	0.0832479	SULT1A1, PINK1, PRDX1, LCN2, CYP1A1, PIM1, NUPR1, SOD2, SCN1B	514	176	20051	1.99482	1	0.704552	0.666493
	GOTERM_BP_FAT	GO:0033762~response to glucagon	3	0.540541	0.0839095	SREBF1, MT-CYTB, CYC1	514	19	20051	6.15943	1	0.706855	0.668671
	GOTERM_BP_FAT	GO:0014874~response to stimulus involved in regulation of muscle adaptation	3	0.540541	0.0839095	SGCA, FBXO32, PPARGC1A	514	19	20051	6.15943	1	0.706855	0.668671
	GOTERM_BP_FAT	GO:0006743~ubiquinone metabolic process	3	0.540541	0.0839095	NDUFA9, COQ8A, COQ9	514	19	20051	6.15943	1	0.706855	0.668671
	GOTERM_BP_FAT	GO:0051262~protein tetramerization	6	1.08108	0.0840308	ME1, SOD2, ALDOA, ACACB, HSD17B10, ACACA	514	91	20051	2.57207	1	0.706855	0.668671
	GOTERM_BP_FAT	GO:0006879~cellular iron ion homeostasis	5	0.900901	0.0848818	ATP6V1G1, GLRX3, NCOA4, LCN2, ACO1	514	65	20051	3.00075	1	0.71293	0.674417
	GOTERM_BP_FAT	GO:0022600~digestive system process	7	1.26126	0.0852358	RBP4, DGAT1, EPB41, LPCAT3, PTGER3, ACO1, ACAT2	514	119	20051	2.29469	1	0.714473	0.675877
	GOTERM_BP_FAT	GO:0050714~positive regulation of protein secretion	9	1.62162	0.0853535	RBP4, PRKCE, MPC2, LEPR, GLRX, MYRIP, PFKM, SORL1, AACS	514	177	20051	1.98355	1	0.714473	0.675877
	GOTERM_BP_FAT	GO:0012501~programmed cell death	66	11.8919	0.0854528	4930453N24RIK, MTCH2, GBE1, RORC, PCSK9, PYGL, ENO1, PTMS, GPI1, RASSF2, ALDH2, RASSF3, SIX4, AKT2, CASP3, RASSF6, PIM1, CTSD, PDK2, PHLDA3, PDK1, UNC5A, IGFBP3, PRKCE, PRLR, ATAD3A, RNF144B, PKM, CDC34, TRAF4, G6PDX, TMEM79, ACOT1, CDIP1, VDAC1, NDUFS1, NUPR1, S100A9, S100A8, PRKAA2, MTFP1, GLRX, PRDX3, ORMDL3, BAG1, CTNNA1, PPARGC1A, EGLN3, DMPK, KCNB1, NTRK3, CIDEA, CHCHD10, RMDN3, DHCR24, FBX…	514	2147	20051	1.19918	1	0.714473	0.675877
	GOTERM_BP_FAT	GO:0010035~response to inorganic substance	25	4.5045	0.0863015	PRKAA2, MT-CO1, KCNA5, GLRX, KHK, GPI1, PRDX3, CASP3, UCP3, PRDX1, LONP1, PPARGC1A, KCNB1, SOD2, CYP51, ADCY10, PINK1, DLG2, STIM1, CYP1A1, LCN2, ACO1, MT-CYTB, ANK, PTGES	514	694	20051	1.40525	1	0.719498	0.680631
	GOTERM_BP_FAT	GO:0043067~regulation of programmed cell death	55	9.90991	0.0868632	4930453N24RIK, MTCH2, GBE1, RORC, PCSK9, ENO1, PTMS, GPI1, RASSF2, ALDH2, RASSF3, SIX4, AKT2, CASP3, RASSF6, PIM1, CTSD, PHLDA3, IGFBP3, PRKCE, PRLR, ATAD3A, RNF144B, CDC34, TRAF4, G6PDX, ACOT1, VDAC1, NUPR1, S100A9, S100A8, PRKAA2, GLRX, PRDX3, ORMDL3, BAG1, CTNNA1, PPARGC1A, EGLN3, KCNB1, NTRK3, CIDEA, CHCHD10, DHCR24, FBXO32, SOD2, TPD52L1, ATOX1, HIPK2, ADCY10, PINK1, LCN2, CYCS, GCLM, RETREG1	514	1754	20051	1.22322	1	0.719498	0.680631
	GOTERM_BP_FAT	GO:0032940~secretion by cell	33	5.94595	0.0869153	NAPA, SNAP25, NRN1, CHD7, PTGER3, GLRX, AACS, RIMS4, MPC2, LEPR, DRD1, TMEM38B, PRKACA, CD177, CADPS2, ARFGEF2, SREBF1, DGAT1, KCNB1, PRKCE, MYO5A, SDHD, MYRIP, SORL1, CYP51, MUP3, RBP4, PINK1, SLC6A9, CRY2, TMEM79, ADTRP, PFKM	514	972	20051	1.3244	1	0.719498	0.680631
	GOTERM_BP_FAT	GO:1901658~glycosyl compound catabolic process	4	0.720721	0.0869336	ENTPD4B, GDA, ENTPD5, DPYD	514	41	20051	3.80583	1	0.719498	0.680631
	GOTERM_BP_FAT	GO:1901661~quinone metabolic process	4	0.720721	0.0869336	NDUFA9, VKORC1L1, COQ8A, COQ9	514	41	20051	3.80583	1	0.719498	0.680631
	GOTERM_BP_FAT	GO:0090181~regulation of cholesterol metabolic process	4	0.720721	0.0869336	SREBF1, ACADVL, ACADL, LPCAT3	514	41	20051	3.80583	1	0.719498	0.680631
	GOTERM_BP_FAT	GO:0055072~iron ion homeostasis	6	1.08108	0.0870971	ATP6V1G1, GLRX3, NCOA4, LCN2, ACO1, SOD2	514	92	20051	2.54411	1	0.719498	0.680631
	GOTERM_BP_FAT	GO:0051223~regulation of protein transport	23	4.14414	0.0871292	SREBF1, KCNB1, PRKCE, INSIG1, PTGER3, GLRX, MYRIP, ACSL3, TOB1, SORL1, AACS, CYP51, MUP3, RBP4, PINK1, CNST, AKT2, MPC2, LEPR, APOD, ADTRP, PRKACA, PFKM	514	631	20051	1.42191	1	0.719498	0.680631
	GOTERM_BP_FAT	GO:0042886~amide transport	58	10.4505	0.0872237	SNAP25, SLC27A1, CHD7, ARXES2, DUSP18, AACS, PTMS, CNST, AKT2, MPC2, LEPR, PRKACA, YWHAG, CADPS2, SREBF1, SLC15A2, DGAT1, VPS13C, PRKCE, NCOA4, TIMM23, MYRIP, ACSL3, MUP3, RBP4, RILPL2, PEX3, CRY2, ADTRP, S100A9, S100A8, NAPA, INSIG1, PTGER3, DERL1, GLRX, TRAK1, TOB1, SAMM50, GRPEL1, APOD, DRD1, RILP, SEC31B, HSPA9, PEX16, ARFGEF2, PEX19, KCNB1, APOC3, MYO5A, SORL1, PEX14, CYP51, PINK1, DLG2, SPI…	514	1861	20051	1.21578	1	0.719498	0.680631
	GOTERM_BP_FAT	GO:0007269~neurotransmitter secretion	9	1.62162	0.08749	NAPA, CADPS2, SNAP25, RIMS4, NRN1, SLC6A9, PRKCE, DRD1, PRKACA	514	178	20051	1.9724	1	0.720621	0.681693
	GOTERM_BP_FAT	GO:0008286~insulin receptor signaling pathway	7	1.26126	0.0878969	SREBF1, AKT2, LONP1, ZBTB7B, SORL1, SH2B2, PDK2	514	120	20051	2.27557	1	0.722896	0.683846
	GOTERM_BP_FAT	GO:0099643~signal release from synapse	9	1.62162	0.0896575	NAPA, CADPS2, SNAP25, RIMS4, NRN1, SLC6A9, PRKCE, DRD1, PRKACA	514	179	20051	1.96138	1	0.736283	0.696509
	GOTERM_BP_FAT	GO:0048678~response to axon injury	6	1.08108	0.0902213	NTRK3, CTNNA1, APOD, RTN4RL2, SOD2, RGMA	514	93	20051	2.51676	1	0.739814	0.69985
	GOTERM_BP_FAT	GO:0051952~regulation of amine transport	7	1.26126	0.0906031	PINK1, SLC36A2, KCNB1, PTGER3, MYO5A, SDHD, NAT8L	514	121	20051	2.25676	1	0.741846	0.701772
	GOTERM_BP_FAT	GO:0071379~cellular response to prostaglandin stimulus	3	0.540541	0.0917074	PRKAA2, PRKCE, ACACA	514	20	20051	5.85146	1	0.746066	0.705763
	GOTERM_BP_FAT	GO:0016082~synaptic vesicle priming	3	0.540541	0.0917074	NAPA, CADPS2, SNAP25	514	20	20051	5.85146	1	0.746066	0.705763
	GOTERM_BP_FAT	GO:0017156~calcium ion regulated exocytosis	9	1.62162	0.0918559	NAPA, CADPS2, SNAP25, RIMS4, NRN1, KCNB1, PRKCE, DRD1, PRKACA	514	180	20051	1.95049	1	0.746066	0.705763
	GOTERM_BP_FAT	GO:0006941~striated muscle contraction	9	1.62162	0.0918559	BSCL2, DMPK, PDE4D, MYL3, ATP1A3, KCNA5, ALDOA, TMEM38B, SCN1B	514	180	20051	1.95049	1	0.746066	0.705763
	GOTERM_BP_FAT	GO:0015804~neutral amino acid transport	4	0.720721	0.0919272	SLC6A6, SLC36A2, SLC6A9, SFXN1	514	42	20051	3.71521	1	0.746066	0.705763
	GOTERM_BP_FAT	GO:0006213~pyrimidine nucleoside metabolic process	4	0.720721	0.0919272	ENTPD4B, UCK1, ENTPD5, DPYD	514	42	20051	3.71521	1	0.746066	0.705763
	GOTERM_BP_FAT	GO:0043255~regulation of carbohydrate biosynthetic process	7	1.26126	0.0933541	AKT2, PGP, LEPR, GPT, ACADM, PDK2, MUP3	514	122	20051	2.23826	1	0.756537	0.715669
	GOTERM_BP_FAT	GO:0032880~regulation of protein localization	34	6.12613	0.0935397	SNAP25, PRKAA2, EPB41, INSIG1, PTGER3, GLRX, TOB1, AACS, CNST, SIX4, AKT2, MPC2, ORMDL3, LEPR, CTNNA1, APOD, PRKACA, CTSD, SREBF1, KCNB1, PRKCE, RALGAPA2, PPP2R5A, MYO5A, ACSL3, MYRIP, SORL1, CYP51, SHISA6, MUP3, RBP4, PINK1, ADTRP, PFKM	514	1013	20051	1.30931	1	0.756933	0.716044
	GOTERM_BP_FAT	GO:0015833~peptide transport	57	10.2703	0.0937098	SNAP25, CHD7, ARXES2, DUSP18, AACS, PTMS, CNST, AKT2, MPC2, LEPR, PRKACA, YWHAG, CADPS2, SREBF1, SLC15A2, DGAT1, VPS13C, PRKCE, NCOA4, TIMM23, MYRIP, ACSL3, MUP3, RBP4, RILPL2, PEX3, CRY2, ADTRP, S100A9, S100A8, NAPA, INSIG1, PTGER3, DERL1, GLRX, TRAK1, TOB1, SAMM50, GRPEL1, APOD, DRD1, RILP, SEC31B, HSPA9, PEX16, ARFGEF2, PEX19, KCNB1, APOC3, MYO5A, SORL1, PEX14, CYP51, PINK1, DLG2, SPIRE1, PFKM	514	1829	20051	1.21572	1	0.757202	0.716298
	GOTERM_BP_FAT	GO:0071466~cellular response to xenobiotic stimulus	9	1.62162	0.0940851	SULT1A1, CYP2D22, PRKAA2, ACSL1, CYP1A1, RORC, FMO1, ACAA1B, RORA	514	181	20051	1.93971	1	0.759127	0.718119
	GOTERM_BP_FAT	GO:0042981~regulation of apoptotic process	54	9.72973	0.0942755	4930453N24RIK, MTCH2, GBE1, RORC, PCSK9, ENO1, PTMS, GPI1, RASSF2, ALDH2, RASSF3, SIX4, AKT2, CASP3, RASSF6, PIM1, CTSD, PHLDA3, IGFBP3, PRKCE, PRLR, ATAD3A, RNF144B, CDC34, TRAF4, G6PDX, ACOT1, VDAC1, NUPR1, S100A9, S100A8, PRKAA2, PRDX3, ORMDL3, BAG1, CTNNA1, PPARGC1A, EGLN3, KCNB1, NTRK3, CIDEA, CHCHD10, DHCR24, FBXO32, SOD2, TPD52L1, ATOX1, HIPK2, ADCY10, PINK1, LCN2, CYCS, GCLM, RETREG1	514	1730	20051	1.21764	1	0.759556	0.718525
	GOTERM_BP_FAT	GO:0045598~regulation of fat cell differentiation	8	1.44144	0.0959289	ZADH2, INSIG1, PIM1, RORC, RORA, SOD2, ZBTB7B, TLCD3B	514	152	20051	2.05314	1	0.766689	0.725272
	GOTERM_BP_FAT	GO:0043279~response to alkaloid	9	1.62162	0.0963451	GPI1, PRKAA2, PRKCE, CASP3, UQCRC1, DRD1, ALDOA, TMEM38B, PPARGC1A	514	182	20051	1.92905	1	0.766689	0.725272
	GOTERM_BP_FAT	GO:0050433~regulation of catecholamine secretion	5	0.900901	0.0963569	PINK1, KCNB1, PTGER3, MYO5A, SDHD	514	68	20051	2.86836	1	0.766689	0.725272
	GOTERM_BP_FAT	GO:0090311~regulation of protein deacetylation	5	0.900901	0.0963569	SREBF1, PINK1, PRKAA2, BC004004, ZBTB7B	514	68	20051	2.86836	1	0.766689	0.725272
	GOTERM_BP_FAT	GO:0008631~intrinsic apoptotic signaling pathway in response to oxidative stress	4	0.720721	0.0970368	PINK1, ALDH2, SOD2, PDK1	514	43	20051	3.62881	1	0.766689	0.725272
	GOTERM_BP_FAT	GO:0050892~intestinal absorption	4	0.720721	0.0970368	DGAT1, LPCAT3, ACO1, ACAT2	514	43	20051	3.62881	1	0.766689	0.725272
	GOTERM_BP_FAT	GO:0045797~positive regulation of intestinal cholesterol absorption	2	0.36036	0.0984852	LPCAT3, ACAT2	514	4	20051	19.5049	1	0.766689	0.725272
	GOTERM_BP_FAT	GO:1990044~protein localization to lipid particle	2	0.36036	0.0984852	PRKAA2, PRKACA	514	4	20051	19.5049	1	0.766689	0.725272
	GOTERM_BP_FAT	GO:0061622~glycolytic process through glucose-1-phosphate	2	0.36036	0.0984852	GALE, PFKM	514	4	20051	19.5049	1	0.766689	0.725272
	GOTERM_BP_FAT	GO:0010982~regulation of high-density lipoprotein particle clearance	2	0.36036	0.0984852	LIPG, APOC3	514	4	20051	19.5049	1	0.766689	0.725272
	GOTERM_BP_FAT	GO:1904438~regulation of ferrous iron import across plasma membrane	2	0.36036	0.0984852	SLC6A9, LCN2	514	4	20051	19.5049	1	0.766689	0.725272
	GOTERM_BP_FAT	GO:0070627~ferrous iron import	2	0.36036	0.0984852	SLC6A9, LCN2	514	4	20051	19.5049	1	0.766689	0.725272
	GOTERM_BP_FAT	GO:0009195~pyrimidine ribonucleoside diphosphate catabolic process	2	0.36036	0.0984852	ENTPD4B, ENTPD5	514	4	20051	19.5049	1	0.766689	0.725272
	GOTERM_BP_FAT	GO:0010510~regulation of acetyl-CoA biosynthetic process from pyruvate	2	0.36036	0.0984852	PDK2, PDK1	514	4	20051	19.5049	1	0.766689	0.725272
	GOTERM_BP_FAT	GO:0006562~proline catabolic process	2	0.36036	0.0984852	ALDH4A1, PRODH	514	4	20051	19.5049	1	0.766689	0.725272
	GOTERM_BP_FAT	GO:0070488~neutrophil aggregation	2	0.36036	0.0984852	S100A9, S100A8	514	4	20051	19.5049	1	0.766689	0.725272
	GOTERM_BP_FAT	GO:1903850~regulation of cristae formation	2	0.36036	0.0984852	PINK1, CHCHD10	514	4	20051	19.5049	1	0.766689	0.725272
	GOTERM_BP_FAT	GO:0009140~pyrimidine nucleoside diphosphate catabolic process	2	0.36036	0.0984852	ENTPD4B, ENTPD5	514	4	20051	19.5049	1	0.766689	0.725272
	GOTERM_BP_FAT	GO:0097460~ferrous iron import into cell	2	0.36036	0.0984852	SLC6A9, LCN2	514	4	20051	19.5049	1	0.766689	0.725272
	GOTERM_BP_FAT	GO:0006256~UDP catabolic process	2	0.36036	0.0984852	ENTPD4B, ENTPD5	514	4	20051	19.5049	1	0.766689	0.725272
	GOTERM_BP_FAT	GO:0006848~pyruvate transport	2	0.36036	0.0984852	MPC1, MPC2	514	4	20051	19.5049	1	0.766689	0.725272
	GOTERM_BP_FAT	GO:0098707~ferrous iron import across plasma membrane	2	0.36036	0.0984852	SLC6A9, LCN2	514	4	20051	19.5049	1	0.766689	0.725272
	GOTERM_BP_FAT	GO:1900390~regulation of iron ion import	2	0.36036	0.0984852	SLC6A9, LCN2	514	4	20051	19.5049	1	0.766689	0.725272
	GOTERM_BP_FAT	GO:1903989~regulation of ferrous iron import into cell	2	0.36036	0.0984852	SLC6A9, LCN2	514	4	20051	19.5049	1	0.766689	0.725272
	GOTERM_BP_FAT	GO:0032270~positive regulation of cellular protein metabolic process	54	9.72973	0.099223	KLB, SLC27A1, MTCH2, RNF14, RMND1, DIXDC1, PCSK9, ENO1, PTMS, RBM3, RASSF2, AKT2, PIM1, LEPR, MAP3K6, CTSD, MAP3K4, SREBF1, ACSL1, IGFBP3, PDE4D, PRKCE, PPP2R5A, MMP8, PRLR, RGMA, RNF144B, GPRC5B, PKM, TRAF4, ADTRP, NUPR1, S100A9, S100A8, TRUB2, PRKAA2, WBP2, PTGER3, DERL1, LPAR3, PACSIN3, DRD1, ZBTB7B, RWDD3, EGLN3, NTRK3, HUWE1, TPD52L1, HIPK2, TADA2B, PINK1, BC004004, LPCAT3, CYCS	514	1733	20051	1.21554	1	0.769699	0.72812
	GOTERM_BP_FAT	GO:0090141~positive regulation of mitochondrial fission	3	0.540541	0.0997063	PINK1, DDHD2, SPIRE1	514	21	20051	5.57282	1	0.769699	0.72812
	GOTERM_BP_FAT	GO:1900037~regulation of cellular response to hypoxia	3	0.540541	0.0997063	RWDD3, PINK1, ENO1	514	21	20051	5.57282	1	0.769699	0.72812
	GOTERM_BP_FAT	GO:0050665~hydrogen peroxide biosynthetic process	3	0.540541	0.0997063	CYP1A1, CYCS, SOD2	514	21	20051	5.57282	1	0.769699	0.72812
	GOTERM_BP_FAT	GO:0046321~positive regulation of fatty acid oxidation	3	0.540541	0.0997063	DGAT1, AKT2, PPARGC1A	514	21	20051	5.57282	1	0.769699	0.72812
	GOTERM_BP_FAT	GO:0034377~plasma lipoprotein particle assembly	3	0.540541	0.0997063	DGAT1, LPCAT3, ACSL3	514	21	20051	5.57282	1	0.769699	0.72812
	GOTERM_BP_FAT	GO:0050709~negative regulation of protein secretion	6	1.08108	0.0999355	SREBF1, KCNB1, PTGER3, ADTRP, CYP51, MUP3	514	96	20051	2.43811	1	0.770395	0.728778
	GOTERM_CC_FAT	GO:0044429~mitochondrial part	138	24.8649	1.50043e-53	MT-ND4L, SLC27A1, MTCH2, ACSM3, MT-CO1, ECI1, NDUFA10, CISD1, ACSM5, COX6A1, MT-ND1, SLC25A48, CHCHD3, MPC1, MPC2, LONP1, SLC25A44, PDK2, TMEM14C, PDK1, PDHX, MIGA2, ACSL1, SDHD, ACSL3, SDHA, ATAD3A, AFG3L2, TMEM135, LACTB2, GPD2, UQCRC1, ACOT2, VDAC1, UQCRC2, LRRC59, COX19, ATP5O, MRPL12, UQCRH, ATP5L, ATP5B, APOO, CYB5R3, GRPEL1, PRDX1, LDHD, CYC1, PRODH, NDUFV2, NDUFV1, PRELID3B, HSPA9, PDHA1,…	495	1035	16713	4.50182	9.82784e-51	9.82784e-51	8.91258e-51
	GOTERM_CC_FAT	GO:0005739~mitochondrion	183	32.973	1.46382e-48	MT-ND4L, PECR, SLC27A1, MTCH2, ISCA1, ACSM3, MT-CO1, ECI1, NDUFA10, CISD1, ACSM5, MTFR1L, COX6A1, MT-ND1, SLC25A48, CHCHD3, MPC1, MPC2, AKT2, LONP1, PRKACA, SLC25A44, PDK2, FADS1, TMEM14C, PDK1, PDHX, MIGA2, ACSL1, PRKCE, SDHD, ACSL3, SDHA, ATAD3A, ACLY, AFG3L2, TMEM135, CYP2D22, LACTB2, GPD2, UQCRC1, ACOT2, ACOT1, VDAC1, UQCRC2, IDI1, LRRC59, COX19, ABHD5, ATP5O, MRPL12, ACACB, UQCRH, ACAT2, ACA…	495	1982	16713	3.11743	9.588e-46	4.794e-46	4.34754e-46
	GOTERM_CC_FAT	GO:0005740~mitochondrial envelope	108	19.4595	2.99255e-39	MT-ND4L, SLC27A1, MTCH2, MT-CO1, ECI1, NDUFA10, CISD1, COX6A1, MT-ND1, SLC25A48, CHCHD3, MPC1, MPC2, SLC25A44, TMEM14C, MIGA2, ACSL1, SDHD, ACSL3, SDHA, ATAD3A, AFG3L2, TMEM135, GPD2, UQCRC1, VDAC1, UQCRC2, COX19, ATP5O, MRPL12, UQCRH, ATP5L, ATP5B, APOO, CYB5R3, GRPEL1, LDHD, CYC1, PRODH, NDUFV2, NDUFV1, PRELID3B, DMPK, CIDEA, CHCHD10, RMDN3, COQ9, UQCRQ, CYP1A1, OGDH, CYCS, SPIRE1, SFXN1, SLC25…	495	846	16713	4.31025	1.96012e-36	6.53373e-37	5.92525e-37
	GOTERM_CC_FAT	GO:0005743~mitochondrial inner membrane	87	15.6757	2.39342e-38	SLC25A1, MT-ND4L, SLC27A1, COX7B, ACADVL, MTCH2, ABCD3, MT-CO1, COX4I1, ECI1, NDUFA10, ATP5G3, DUSP18, COX6A1, MT-ND1, SLC25A48, CHCHD3, MPC1, MPC2, UQCRFS1, SLC25A44, RAB5IF, TMEM14C, COX8B, GPX4, MRPS2, TIMM23, SDHD, SDHA, ATAD3A, NIPSNAP1, HADHB, HADHA, AFG3L2, NDUFS8, TST, SLC25A19, GPD2, CHDH, UQCRC1, NDUFS2, VDAC1, SLC25A10, NDUFS1, UQCRC2, NDUFB9, PCX, MTFP1, NDUFB5, ATP5A1, UQCR10, ATP5O,…	495	551	16713	5.3311	1.56769e-35	3.91923e-36	3.55423e-36
	GOTERM_CC_FAT	GO:0031966~mitochondrial membrane	103	18.5586	3.48923e-38	MT-ND4L, SLC27A1, MTCH2, MT-CO1, ECI1, NDUFA10, CISD1, COX6A1, MT-ND1, SLC25A48, CHCHD3, MPC1, MPC2, SLC25A44, TMEM14C, MIGA2, ACSL1, SDHD, ACSL3, SDHA, ATAD3A, AFG3L2, TMEM135, GPD2, UQCRC1, VDAC1, UQCRC2, ATP5O, MRPL12, UQCRH, ATP5L, ATP5B, APOO, CYB5R3, GRPEL1, LDHD, CYC1, PRODH, NDUFV2, NDUFV1, DMPK, CHCHD10, RMDN3, COQ9, UQCRQ, CYP1A1, OGDH, SPIRE1, SFXN1, SLC25A1, COX7B, ACADVL, ABCD3, COX4…	495	789	16713	4.40767	2.28544e-35	4.57089e-36	4.1452e-36
	GOTERM_CC_FAT	GO:0019866~organelle inner membrane	89	16.036	1.86403e-36	SLC25A1, MT-ND4L, SLC27A1, COX7B, ACADVL, MTCH2, ABCD3, MT-CO1, COX4I1, ECI1, NDUFA10, ATP5G3, DUSP18, COX6A1, MT-ND1, TM7SF2, SLC25A48, CHCHD3, MPC1, MPC2, UQCRFS1, SLC25A44, RAB5IF, TMEM14C, COX8B, GPX4, MRPS2, TIMM23, SDHD, SDHA, ATAD3A, NIPSNAP1, HADHB, HADHA, AFG3L2, NDUFS8, TST, SLC25A19, GPD2, CHDH, UQCRC1, NDUFS2, VDAC1, SLC25A10, NDUFS1, UQCRC2, NDUFB9, PCX, MTFP1, NDUFB5, ATP5A1, UQCR10…	495	611	16713	4.91811	1.22094e-33	2.0349e-34	1.84539e-34
	GOTERM_CC_FAT	GO:0098798~mitochondrial protein complex	48	8.64865	1.54795e-31	NDUFB9, MT-ND4L, COX7B, MT-CO1, NDUFB5, COX4I1, NDUFA10, ATP5A1, ATP5G3, UQCR10, ATP5O, COX6A1, COX5A, UQCRH, ATP5L, MT-ND1, APOO, ATP5B, CHCHD3, SAMM50, GRPEL1, IDH3B, UQCRFS1, CYC1, NDUFV2, NDUFV1, BCKDHA, NDUFA9, COX8B, NDUFA6, ATP5PB, IDH3G, CHCHD10, IMMT, TIMM23, SDHD, SDHA, BCKDK, AFG3L2, NDUFS8, UQCRQ, UQCRC1, NDUFS2, MT-CYTB, VDAC1, NDUFS1, UQCRC2, DLD	495	179	16713	9.05394	1.01391e-28	1.44844e-29	1.31354e-29
	GOTERM_CC_FAT	GO:0031967~organelle envelope	123	22.1622	2.97974e-31	MT-ND4L, SLC27A1, MTCH2, MT-CO1, ECI1, NDUFA10, CISD1, ENO1, COX6A1, MT-ND1, TM7SF2, SLC25A48, CHCHD3, MPC1, MPC2, SLC25A44, TMEM14C, IL15RA, MIGA2, ACSL1, SDHD, ACSL3, SDHA, ATAD3A, AFG3L2, TMEM135, GPD2, UQCRC1, VDAC1, CHIL3, UQCRC2, PTGES, LRRC59, COX19, MGST2, ATP5O, MRPL12, UQCRH, ATP5L, HSD11B1, ATP5B, APOO, CYB5R3, GRPEL1, LDHD, CYC1, PRODH, NDUFV2, NDUFV1, PRELID3B, TMEM120B, DMPK, CIDEA,…	495	1320	16713	3.14616	1.95173e-28	2.33151e-29	2.11437e-29
	GOTERM_CC_FAT	GO:0031975~envelope	123	22.1622	3.2036e-31	MT-ND4L, SLC27A1, MTCH2, MT-CO1, ECI1, NDUFA10, CISD1, ENO1, COX6A1, MT-ND1, TM7SF2, SLC25A48, CHCHD3, MPC1, MPC2, SLC25A44, TMEM14C, IL15RA, MIGA2, ACSL1, SDHD, ACSL3, SDHA, ATAD3A, AFG3L2, TMEM135, GPD2, UQCRC1, VDAC1, CHIL3, UQCRC2, PTGES, LRRC59, COX19, MGST2, ATP5O, MRPL12, UQCRH, ATP5L, HSD11B1, ATP5B, APOO, CYB5R3, GRPEL1, LDHD, CYC1, PRODH, NDUFV2, NDUFV1, PRELID3B, TMEM120B, DMPK, CIDEA,…	495	1321	16713	3.14378	2.09836e-28	2.33151e-29	2.11437e-29
	GOTERM_CC_FAT	GO:0044455~mitochondrial membrane part	54	9.72973	4.12611e-29	MT-ND4L, COX7B, ACADVL, MT-CO1, COX4I1, NDUFA10, CISD1, ATP5G3, DUSP18, COX6A1, MT-ND1, CHCHD3, MPC1, MPC2, UQCRFS1, RAB5IF, COX8B, TIMM23, SDHD, SDHA, AFG3L2, NDUFS8, SLC25A19, UQCRC1, NDUFS2, NDUFS1, UQCRC2, NDUFB9, NDUFB5, ATP5A1, UQCR10, ATP5O, COX5A, UQCRH, ATP5L, ATP5B, APOO, SAMM50, GRPEL1, CYC1, NDUFV2, NDUFV1, NDUFA9, NDUFA6, DMPK, ATP5PB, CHCHD10, IMMT, PINK1, UQCRQ, SPIRE1, MT-CYTB, SF…	495	265	16713	6.88014	2.70261e-26	2.70261e-27	2.45091e-27
	GOTERM_CC_FAT	GO:0098800~inner mitochondrial membrane protein complex	41	7.38739	3.821e-28	NDUFB9, MT-ND4L, COX7B, MT-CO1, NDUFB5, COX4I1, NDUFA10, ATP5A1, ATP5G3, UQCR10, ATP5O, COX6A1, COX5A, UQCRH, ATP5L, MT-ND1, APOO, ATP5B, CHCHD3, GRPEL1, UQCRFS1, CYC1, NDUFV2, NDUFV1, NDUFA9, COX8B, NDUFA6, ATP5PB, CHCHD10, IMMT, TIMM23, SDHD, SDHA, AFG3L2, NDUFS8, UQCRQ, UQCRC1, NDUFS2, MT-CYTB, NDUFS1, UQCRC2	495	143	16713	9.68048	2.50275e-25	2.27523e-26	2.06334e-26
	GOTERM_CC_FAT	GO:1990204~oxidoreductase complex	38	6.84685	4.17404e-28	NDUFB9, MT-ND4L, MT-CO1, NDUFB5, NDUFA10, DLST, PDHB, UQCR10, UQCRH, MT-ND1, CYB5R3, IDH3B, UQCRFS1, DLAT, CYC1, NDUFV2, NDUFV1, PDK2, PDK1, BCKDHA, NDUFA9, PDHX, PDHA1, NDUFA6, IDH3G, SDHD, SDHA, BCKDK, NDUFS8, UQCRQ, GPD2, UQCRC1, OGDH, NDUFS2, MT-CYTB, NDUFS1, UQCRC2, DLD	495	118	16713	10.873	2.734e-25	2.27833e-26	2.06615e-26
	GOTERM_CC_FAT	GO:0070469~respiratory chain	30	5.40541	1.26394e-21	NDUFB9, MT-ND4L, COX7B, MT-CO1, NDUFB5, COX4I1, NDUFA10, UQCR10, COX6A1, COX5A, UQCRH, MT-ND1, UQCRFS1, CYC1, NDUFV2, NDUFV1, RAB5IF, NDUFA9, COX8B, NDUFA6, SDHD, SDHA, NDUFS8, UQCRQ, UQCRC1, CYCS, NDUFS2, MT-CYTB, NDUFS1, UQCRC2	495	97	16713	10.4424	8.2788e-19	6.3683e-20	5.77523e-20
	GOTERM_CC_FAT	GO:0005746~mitochondrial respiratory chain	29	5.22523	1.8869e-21	NDUFB9, MT-ND4L, COX7B, MT-CO1, NDUFB5, COX4I1, NDUFA10, UQCR10, COX6A1, COX5A, UQCRH, MT-ND1, UQCRFS1, CYC1, NDUFV2, NDUFV1, RAB5IF, NDUFA9, COX8B, NDUFA6, SDHD, SDHA, NDUFS8, UQCRQ, UQCRC1, NDUFS2, MT-CYTB, NDUFS1, UQCRC2	495	90	16713	10.8794	1.23592e-18	8.828e-20	8.00585e-20
	GOTERM_CC_FAT	GO:0098803~respiratory chain complex	28	5.04505	2.90142e-20	NDUFB9, MT-ND4L, COX7B, MT-CO1, NDUFB5, COX4I1, NDUFA10, UQCR10, COX6A1, COX5A, UQCRH, MT-ND1, UQCRFS1, CYC1, NDUFV2, NDUFV1, NDUFA9, COX8B, NDUFA6, SDHD, SDHA, NDUFS8, UQCRQ, UQCRC1, NDUFS2, MT-CYTB, NDUFS1, UQCRC2	495	90	16713	10.5042	1.90043e-17	1.26695e-18	1.14896e-18
	GOTERM_CC_FAT	GO:0005759~mitochondrial matrix	51	9.18919	8.45225e-20	ACADVL, ACSM3, ECI1, NDUFA10, ACSM5, ALDH2, ACADL, LONP1, IDH3B, ME2, DLAT, ACADM, PDK2, PDK1, BCKDHA, CBR2, PDHX, GLRX5, MRPS2, ATAD3A, COASY, HADHB, HADHA, TST, LACTB2, ACOT2, VDAC1, DLD, LRRC59, TRUB2, ACSS3, PCX, DLST, PDHB, MRPL12, HSD17B10, TBRG4, ATP5B, GRPEL1, PRDX1, PRODH, HSPA9, NDUFA9, PDHA1, MDH2, IDH3G, SOD2, BCKDK, ALDH4A1, CS, OGDH	495	367	16713	4.69195	5.53622e-17	3.46014e-18	3.1379e-18
	GOTERM_CC_FAT	GO:0043209~myelin sheath	37	6.66667	1.83895e-17	NAPA, SNAP25, NDUFA10, ATP5A1, DLST, ATP1A3, ENO1, ATP5O, COX6A1, COX5A, GPI1, PRDX3, ATP5B, PRDX1, UQCRFS1, DLAT, NDUFV2, YWHAG, HSPA9, PDHA1, MDH1, MDH2, ATP5PB, PGAM1, IMMT, SDHA, SOD2, PKM, UQCRC1, CYCS, VDAC1, NDUFS1, ACO2, UQCRC2, ALDOA, TKT, DLD	495	215	16713	5.81049	1.20451e-14	7.08535e-16	6.42549e-16
	GOTERM_CC_FAT	GO:0005777~peroxisome	25	4.5045	1.86699e-11	IDI1, PECR, ABCD3, ACAA1B, DDO, PRDX1, PEX16, PEX19, ACSL1, MYO5A, ACSL3, PEX14, NUDT7, TMEM135, ACOX2, PEX3, ZADH2, SERHL, MVD, TKT, CRAT, ACOT4, ACOT3, PAOX, TUBA8	495	152	16713	5.55323	1.22287e-08	6.43619e-10	5.83679e-10
	GOTERM_CC_FAT	GO:0042579~microbody	25	4.5045	1.86699e-11	IDI1, PECR, ABCD3, ACAA1B, DDO, PRDX1, PEX16, PEX19, ACSL1, MYO5A, ACSL3, PEX14, NUDT7, TMEM135, ACOX2, PEX3, ZADH2, SERHL, MVD, TKT, CRAT, ACOT4, ACOT3, PAOX, TUBA8	495	152	16713	5.55323	1.22287e-08	6.43619e-10	5.83679e-10
	GOTERM_CC_FAT	GO:0070069~cytochrome complex	14	2.52252	4.52413e-11	COX7B, COX8B, MT-CO1, COX4I1, UQCR10, COX6A1, COX5A, UQCRH, UQCRQ, UQCRC1, UQCRFS1, MT-CYTB, CYC1, UQCRC2	495	39	16713	12.1203	2.96331e-08	1.48165e-09	1.34367e-09
	GOTERM_CC_FAT	GO:0045275~respiratory chain complex III	9	1.62162	2.4574e-10	UQCRQ, MT-CO1, UQCRC1, UQCRFS1, MT-CYTB, UQCR10, UQCRC2, CYC1, UQCRH	495	12	16713	25.3227	1.6096e-07	7.31635e-09	6.63498e-09
	GOTERM_CC_FAT	GO:0005750~mitochondrial respiratory chain complex III	9	1.62162	2.4574e-10	UQCRQ, MT-CO1, UQCRC1, UQCRFS1, MT-CYTB, UQCR10, UQCRC2, CYC1, UQCRH	495	12	16713	25.3227	1.6096e-07	7.31635e-09	6.63498e-09
	GOTERM_CC_FAT	GO:0005967~mitochondrial pyruvate dehydrogenase complex	7	1.26126	4.4185e-09	PDHX, PDHA1, PDHB, DLAT, DLD, PDK2, PDK1	495	7	16713	33.7636	2.89411e-06	1.25831e-07	1.14113e-07
	GOTERM_CC_FAT	GO:0045254~pyruvate dehydrogenase complex	7	1.26126	1.72317e-08	PDHX, PDHA1, PDHB, DLAT, DLD, PDK2, PDK1	495	8	16713	29.5432	1.12867e-05	4.70283e-07	4.26485e-07
	GOTERM_CC_FAT	GO:0098573~intrinsic component of mitochondrial membrane	15	2.7027	2.08906e-07	DMPK, TIMM23, CHCHD10, IMMT, DUSP18, AFG3L2, APOO, PINK1, CHCHD3, MPC1, SLC25A19, MPC2, SPIRE1, SFXN1, MT-CYTB	495	86	16713	5.88901	0.000136824	4.97088e-06	4.50795e-06
	GOTERM_CC_FAT	GO:0030964~NADH dehydrogenase complex	12	2.16216	2.20085e-07	NDUFA9, MT-ND4L, NDUFB9, NDUFA6, NDUFS8, NDUFB5, NDUFA10, NDUFS2, NDUFS1, NDUFV2, NDUFV1, MT-ND1	495	51	16713	7.94439	0.000144145	4.97088e-06	4.50795e-06
	GOTERM_CC_FAT	GO:0045271~respiratory chain complex I	12	2.16216	2.20085e-07	NDUFA9, MT-ND4L, NDUFB9, NDUFA6, NDUFS8, NDUFB5, NDUFA10, NDUFS2, NDUFS1, NDUFV2, NDUFV1, MT-ND1	495	51	16713	7.94439	0.000144145	4.97088e-06	4.50795e-06
	GOTERM_CC_FAT	GO:0005747~mitochondrial respiratory chain complex I	12	2.16216	2.20085e-07	NDUFA9, MT-ND4L, NDUFB9, NDUFA6, NDUFS8, NDUFB5, NDUFA10, NDUFS2, NDUFS1, NDUFV2, NDUFV1, MT-ND1	495	51	16713	7.94439	0.000144145	4.97088e-06	4.50795e-06
	GOTERM_CC_FAT	GO:0031304~intrinsic component of mitochondrial inner membrane	12	2.16216	2.20085e-07	AFG3L2, APOO, CHCHD3, SLC25A19, MPC1, MPC2, TIMM23, CHCHD10, IMMT, SFXN1, MT-CYTB, DUSP18	495	51	16713	7.94439	0.000144145	4.97088e-06	4.50795e-06
	GOTERM_CC_FAT	GO:0032592~integral component of mitochondrial membrane	14	2.52252	1.0352e-06	DMPK, TIMM23, CHCHD10, IMMT, AFG3L2, APOO, PINK1, CHCHD3, MPC1, SLC25A19, MPC2, SPIRE1, SFXN1, MT-CYTB	495	84	16713	5.62727	0.000677824	2.26018e-05	2.04969e-05
	GOTERM_CC_FAT	GO:0009295~nucleoid	11	1.98198	1.10826e-06	HSPA9, HADHB, ATP5B, HADHA, LRRC59, ACADVL, LONP1, VDAC1, SOD2, HSD17B10, ATAD3A	495	48	16713	7.7375	0.000725647	2.26847e-05	2.05721e-05
	GOTERM_CC_FAT	GO:0042645~mitochondrial nucleoid	11	1.98198	1.10826e-06	HSPA9, HADHB, ATP5B, HADHA, LRRC59, ACADVL, LONP1, VDAC1, SOD2, HSD17B10, ATAD3A	495	48	16713	7.7375	0.000725647	2.26847e-05	2.05721e-05
	GOTERM_CC_FAT	GO:0031305~integral component of mitochondrial inner membrane	11	1.98198	1.65069e-06	AFG3L2, APOO, CHCHD3, SLC25A19, MPC1, MPC2, TIMM23, CHCHD10, IMMT, SFXN1, MT-CYTB	495	50	16713	7.428	0.00108062	3.27637e-05	2.97125e-05
	GOTERM_CC_FAT	GO:0005751~mitochondrial respiratory chain complex IV	8	1.44144	4.22405e-06	COX7B, COX8B, MT-CO1, COX4I1, UQCRFS1, UQCRC2, COX6A1, COX5A	495	24	16713	11.2545	0.00276293	8.1375e-05	7.37966e-05
	GOTERM_CC_FAT	GO:0005789~endoplasmic reticulum membrane	59	10.6306	4.56936e-06	VKORC1L1, TECR, ARXES2, MSMO1, TM7SF2, PTMS, FADS2, NSDHL, SCD1, TMEM38B, FADS1, SREBF1, DGAT1, ACSL1, ELOVL5, MMGT1, ELOVL3, ELOVL6, ACSL3, TLCD3B, LSS, BSCL2, STIM1, NAT8L, TKT, GRAMD1B, LRRC59, DIPK1B, INSIG1, DERL1, MGST2, FITM2, HSD17B12, AGPAT2, HSD11B1, APOO, CYB5R3, RDH11, ORMDL3, EMC6, DRD1, RCE1, SEC31B, FDFT1, PEX16, DMPK, FMO1, DHCR24, SORL1, CYP51, SQLE, LPCAT3, CYP1A1, ATG2A, CHPT1,…	495	1064	16713	1.87223	0.00298846	8.55123e-05	7.75485e-05
	GOTERM_CC_FAT	GO:0042175~nuclear outer membrane-endoplasmic reticulum membrane network	60	10.8108	5.04332e-06	VKORC1L1, TECR, ARXES2, MSMO1, ENO1, TM7SF2, PTMS, FADS2, NSDHL, SCD1, TMEM38B, FADS1, SREBF1, DGAT1, ACSL1, ELOVL5, MMGT1, ELOVL3, ELOVL6, ACSL3, TLCD3B, LSS, BSCL2, STIM1, NAT8L, TKT, GRAMD1B, LRRC59, DIPK1B, INSIG1, DERL1, MGST2, FITM2, HSD17B12, AGPAT2, HSD11B1, APOO, CYB5R3, RDH11, ORMDL3, EMC6, DRD1, RCE1, SEC31B, FDFT1, PEX16, DMPK, FMO1, DHCR24, SORL1, CYP51, SQLE, LPCAT3, CYP1A1, ATG2A, …	495	1093	16713	1.85345	0.00329793	9.17604e-05	8.32148e-05
	GOTERM_CC_FAT	GO:0044432~endoplasmic reticulum part	64	11.5315	5.3269e-06	VKORC1L1, TECR, PCSK9, ARXES2, MSMO1, PCSK4, TM7SF2, PTMS, FADS2, NSDHL, SCD1, TMEM38B, FADS1, SREBF1, DGAT1, ACSL1, ELOVL5, MMGT1, ENTPD5, ELOVL3, ELOVL6, ACSL3, TLCD3B, LSS, BSCL2, STIM1, CHIL3, NAT8L, TKT, GRAMD1B, LRRC59, LRPAP1, DIPK1B, INSIG1, DERL1, MGST2, FITM2, HSD17B12, AGPAT2, HSD11B1, APOO, CYB5R3, RDH11, ORMDL3, EMC6, DRD1, RCE1, SEC31B, FDFT1, PEX16, DMPK, FMO1, DHCR24, SORL1, CYP51…	495	1197	16713	1.80524	0.00348305	9.41013e-05	8.53377e-05
	GOTERM_CC_FAT	GO:0044439~peroxisomal part	13	2.34234	5.60298e-06	PEX16, PECR, PEX19, ABCD3, ACSL1, ACSL3, PEX14, NUDT7, TMEM135, PEX3, PRDX1, MVD, PAOX	495	83	16713	5.28828	0.00366324	9.41013e-05	8.53377e-05
	GOTERM_CC_FAT	GO:0044438~microbody part	13	2.34234	5.60298e-06	PEX16, PECR, PEX19, ABCD3, ACSL1, ACSL3, PEX14, NUDT7, TMEM135, PEX3, PRDX1, MVD, PAOX	495	83	16713	5.28828	0.00366324	9.41013e-05	8.53377e-05
	GOTERM_CC_FAT	GO:0045239~tricarboxylic acid cycle enzyme complex	7	1.26126	6.06655e-06	BCKDHA, BCKDK, IDH3G, OGDH, IDH3B, DLST, DLD	495	17	16713	13.9027	0.00396572	9.93398e-05	9.00883e-05
	GOTERM_CC_FAT	GO:0045277~respiratory chain complex IV	8	1.44144	1.0035e-05	COX7B, COX8B, MT-CO1, COX4I1, UQCRFS1, UQCRC2, COX6A1, COX5A	495	27	16713	10.004	0.00655142	0.000160316	0.000145385
	GOTERM_CC_FAT	GO:0005783~endoplasmic reticulum	89	16.036	1.19802e-05	KLB, VKORC1L1, SLC27A1, ATP8A1, TECR, PCSK9, ARXES2, MSMO1, SLC2A4, PCSK4, TM7SF2, PTMS, FADS2, NSDHL, AKT2, SCD1, TMEM38B, FADS1, SREBF1, DGAT1, ACSL1, ELOVL5, MMGT1, PRKCE, ENTPD5, ELOVL3, ELOVL6, ACSL3, TLCD3B, LSS, RGMA, HADHB, BSCL2, PKM, STIM1, PEX3, TLCD4, CHIL3, NAT8L, TKT, GRAMD1B, LRRC59, LRPAP1, VAC14, DIPK1B, INSIG1, DERL1, ATP1A3, MGST2, KCNA5, FITM2, HSD17B12, HSD17B10, AGPAT2, HSD1…	495	1903	16713	1.57907	0.00781638	0.000186834	0.000169434
	GOTERM_CC_FAT	GO:0030176~integral component of endoplasmic reticulum membrane	17	3.06306	4.242e-05	ELOVL5, MMGT1, INSIG1, TECR, ELOVL3, DERL1, ELOVL6, FITM2, TM7SF2, BSCL2, HSD11B1, STIM1, EMC6, RCE1, SCD1, RETREG1, H2-Q10	495	169	16713	3.39634	0.0274032	0.000646165	0.000585988
	GOTERM_CC_FAT	GO:0031301~integral component of organelle membrane	21	3.78378	6.30034e-05	ENTPD4B, PEX16, ATP8A1, DMPK, TIMM23, CHCHD10, IMMT, PCSK4, AFG3L2, APOO, PINK1, CHCHD3, SLC6A9, MPC1, SLC25A19, PEX3, MPC2, SPIRE1, SFXN1, MT-CYTB, EMC6	495	252	16713	2.81364	0.0404286	0.000937892	0.000850547
	GOTERM_CC_FAT	GO:0031227~intrinsic component of endoplasmic reticulum membrane	17	3.06306	7.41145e-05	ELOVL5, MMGT1, INSIG1, TECR, ELOVL3, DERL1, ELOVL6, FITM2, TM7SF2, BSCL2, HSD11B1, STIM1, EMC6, RCE1, SCD1, RETREG1, H2-Q10	495	177	16713	3.24284	0.0473872	0.00107878	0.000978311
	GOTERM_CC_FAT	GO:0031300~intrinsic component of organelle membrane	22	3.96396	8.91023e-05	ENTPD4B, PEX16, ATP8A1, DMPK, TIMM23, CHCHD10, IMMT, DUSP18, PCSK4, AFG3L2, APOO, PINK1, CHCHD3, SLC6A9, MPC1, SLC25A19, PEX3, MPC2, SPIRE1, SFXN1, MT-CYTB, EMC6	495	279	16713	2.66237	0.0566941	0.00126874	0.00115058
	GOTERM_CC_FAT	GO:0045240~dihydrolipoyl dehydrogenase complex	5	0.900901	0.000137425	BCKDHA, BCKDK, OGDH, DLST, DLD	495	10	16713	16.8818	0.086087	0.00191518	0.00173682
	GOTERM_CC_FAT	GO:0030062~mitochondrial tricarboxylic acid cycle enzyme complex	5	0.900901	0.000210917	BCKDHA, BCKDK, IDH3G, IDH3B, DLD	495	11	16713	15.3471	0.129045	0.00287814	0.0026101
	GOTERM_CC_FAT	GO:0005753~mitochondrial proton-transporting ATP synthase complex	6	1.08108	0.000303849	ATP5B, ATP5PB, ATP5A1, ATP5G3, ATP5O, ATP5L	495	21	16713	9.64675	0.180492	0.00406165	0.00368339
	GOTERM_CC_FAT	GO:0005778~peroxisomal membrane	9	1.62162	0.000324616	PEX16, PECR, TMEM135, PEX19, ABCD3, ACSL1, PEX3, ACSL3, PEX14	495	59	16713	5.15039	0.191568	0.00416909	0.00378083
	GOTERM_CC_FAT	GO:0031903~microbody membrane	9	1.62162	0.000324616	PEX16, PECR, TMEM135, PEX19, ABCD3, ACSL1, PEX3, ACSL3, PEX14	495	59	16713	5.15039	0.191568	0.00416909	0.00378083
	GOTERM_CC_FAT	GO:0045259~proton-transporting ATP synthase complex	6	1.08108	0.000383732	ATP5B, ATP5PB, ATP5A1, ATP5G3, ATP5O, ATP5L	495	22	16713	9.20826	0.222283	0.00483355	0.0043834
	GOTERM_CC_FAT	GO:1905368~peptidase complex	13	2.34234	0.00054736	PSMD12, ADRM1, ARXES2, TADA2B, PSMA6, AFG3L2, PSMD4, PSMB3, PSMD5, PSMC1, CASP3, PSMD3, MASP1	495	132	16713	3.32521	0.30136	0.00676454	0.00613456
	GOTERM_CC_FAT	GO:0005838~proteasome regulatory particle	6	1.08108	0.000589872	PSMD12, PSMD4, PSMD5, PSMC1, ADRM1, PSMD3	495	24	16713	8.44091	0.320556	0.00715493	0.0064886
	GOTERM_CC_FAT	GO:0031970~organelle envelope lumen	12	2.16216	0.000647136	COX19, PINK1, TIMM23, CHCHD10, CYCS, IMMT, GLRX, NDUFS1, DUSP18, SORL1, PTGES, PRELID3B	495	116	16713	3.49279	0.345584	0.0077068	0.00698907
	GOTERM_CC_FAT	GO:0022624~proteasome accessory complex	6	1.08108	0.00123744	PSMD12, PSMD4, PSMD5, PSMC1, ADRM1, PSMD3	495	28	16713	7.23506	0.555597	0.0144736	0.0131257
	GOTERM_CC_FAT	GO:0005811~lipid particle	11	1.98198	0.00155492	BSCL2, ALDH3B2, NSDHL, TMEM135, CYB5R3, ATG2A, CIDEA, PLIN2, ACSL3, ABHD5, LSS	495	110	16713	3.37636	0.639141	0.017868	0.0162039
	GOTERM_CC_FAT	GO:0061617~MICOS complex	4	0.720721	0.00188747	APOO, CHCHD3, CHCHD10, IMMT	495	9	16713	15.0061	0.709881	0.0213154	0.0193303
	GOTERM_CC_FAT	GO:0005741~mitochondrial outer membrane	15	2.7027	0.00201699	MTCH2, MIGA2, DMPK, ACSL1, NTRK3, VPS13C, CISD1, RMDN3, ACSL3, HADHB, PINK1, SAMM50, CYB5R3, SPIRE1, VDAC1	495	195	16713	2.5972	0.733521	0.022392	0.0203066
	GOTERM_CC_FAT	GO:1905369~endopeptidase complex	10	1.8018	0.00213057	PSMA6, PSMD12, PSMD4, PSMD5, PSMB3, PSMC1, CASP3, ADRM1, PSMD3, MASP1	495	96	16713	3.51705	0.752665	0.0232587	0.0210926
	GOTERM_CC_FAT	GO:0031968~organelle outer membrane	16	2.88288	0.00307503	MTCH2, MIGA2, DMPK, ACSL1, NTRK3, VPS13C, CISD1, RMDN3, ENO1, ACSL3, HADHB, PINK1, SAMM50, CYB5R3, SPIRE1, VDAC1	495	226	16713	2.39035	0.866979	0.0324862	0.0294608
	GOTERM_CC_FAT	GO:0019867~outer membrane	16	2.88288	0.00307503	MTCH2, MIGA2, DMPK, ACSL1, NTRK3, VPS13C, CISD1, RMDN3, ENO1, ACSL3, HADHB, PINK1, SAMM50, CYB5R3, SPIRE1, VDAC1	495	226	16713	2.39035	0.866979	0.0324862	0.0294608
	GOTERM_CC_FAT	GO:0005758~mitochondrial intermembrane space	10	1.8018	0.00344239	COX19, PINK1, TIMM23, CHCHD10, CYCS, IMMT, GLRX, NDUFS1, DUSP18, PRELID3B	495	103	16713	3.27802	0.895509	0.0357899	0.0324568
	GOTERM_CC_FAT	GO:0000502~proteasome complex	8	1.44144	0.00386484	PSMA6, PSMD12, PSMD4, PSMD5, PSMB3, PSMC1, ADRM1, PSMD3	495	68	16713	3.97219	0.920847	0.0395542	0.0358705
	GOTERM_CC_FAT	GO:0016469~proton-transporting two-sector ATPase complex	7	1.26126	0.00416339	ATP5B, ATP6V1G1, ATP5PB, ATP5A1, ATP5G3, ATP5O, ATP5L	495	52	16713	4.5451	0.934957	0.0419541	0.038047
	GOTERM_CC_FAT	GO:0000276~mitochondrial proton-transporting ATP synthase complex, coupling factor F(o)	4	0.720721	0.00462694	ATP5PB, ATP5G3, ATP5O, ATP5L	495	12	16713	11.2545	0.952054	0.0459189	0.0416425
	GOTERM_CC_FAT	GO:0042571~immunoglobulin complex, circulating	14	2.52252	0.00473418	IGHV1-82, IGHV1-50, IGHV1-52, IGHV1-11, IGHV1-22, IGHV1-26, IGHG3, IGHV11-2, IGHG2C, IGHG1, IGHA, IGHV5-9, IGLC1, IGHV3-6	495	192	16713	2.46193	0.955321	0.0462819	0.0419717
	GOTERM_CC_FAT	GO:1990351~transporter complex	20	3.6036	0.00877847	SNAP25, NRN1, ATP8A1, MT-CO1, KCNB1, PDE4D, ATP1A3, KCNA5, ATP5G3, UQCR10, UQCRH, PEX14, SHISA6, UQCRQ, UQCRC1, UQCRFS1, MT-CYTB, CYC1, UQCRC2, SCN1B	495	352	16713	1.91839	0.996897	0.082288	0.0746246
	GOTERM_CC_FAT	GO:0031907~microbody lumen	5	0.900901	0.00879414	NUDT7, ABCD3, PRDX1, MVD, PAOX	495	28	16713	6.02922	0.996929	0.082288	0.0746246
	GOTERM_CC_FAT	GO:0005782~peroxisomal matrix	5	0.900901	0.00879414	NUDT7, ABCD3, PRDX1, MVD, PAOX	495	28	16713	6.02922	0.996929	0.082288	0.0746246
	GOTERM_CC_FAT	GO:0045263~proton-transporting ATP synthase complex, coupling factor F(o)	4	0.720721	0.00895956	ATP5PB, ATP5G3, ATP5O, ATP5L	495	15	16713	9.00364	0.997247	0.0826551	0.0749575
	GOTERM_CC_FAT	GO:0045252~oxoglutarate dehydrogenase complex	3	0.540541	0.0120858	OGDH, DLST, DLD	495	6	16713	16.8818	0.999652	0.106976	0.0970129
	GOTERM_CC_FAT	GO:0005947~mitochondrial alpha-ketoglutarate dehydrogenase complex	3	0.540541	0.0120858	BCKDHA, BCKDK, DLD	495	6	16713	16.8818	0.999652	0.106976	0.0970129
	GOTERM_CC_FAT	GO:0045261~proton-transporting ATP synthase complex, catalytic core F(1)	3	0.540541	0.0120858	ATP5B, ATP5A1, ATP5O	495	6	16713	16.8818	0.999652	0.106976	0.0970129
	GOTERM_CC_FAT	GO:0033178~proton-transporting two-sector ATPase complex, catalytic domain	4	0.720721	0.0150489	ATP5B, ATP6V1G1, ATP5A1, ATP5O	495	18	16713	7.50303	0.999951	0.131427	0.119187
	GOTERM_CC_FAT	GO:1902495~transmembrane transporter complex	18	3.24324	0.0193034	SNAP25, NRN1, MT-CO1, KCNB1, PDE4D, ATP1A3, KCNA5, ATP5G3, UQCR10, UQCRH, SHISA6, UQCRQ, UQCRC1, UQCRFS1, MT-CYTB, CYC1, UQCRC2, SCN1B	495	330	16713	1.84165	0.999997	0.166365	0.150872
	GOTERM_CC_FAT	GO:0098857~membrane microdomain	22	3.96396	0.0203783	SNAP25, SLC27A1, UNC5A, ATP5A1, RTN4RL2, KCNA5, ENO1, SLC2A4, ATP5B, GPRC5B, ADGRG1, STIM1, SGCA, CASP3, CTNNA1, PGK1, VDAC1, ADTRP, DRD1, PRKACA, CTSD, CD177	495	438	16713	1.69589	0.999999	0.172033	0.156012
	GOTERM_CC_FAT	GO:0045121~membrane raft	22	3.96396	0.0204864	SNAP25, SLC27A1, UNC5A, ATP5A1, RTN4RL2, KCNA5, ENO1, SLC2A4, ATP5B, GPRC5B, ADGRG1, STIM1, SGCA, CASP3, CTNNA1, PGK1, VDAC1, ADTRP, DRD1, PRKACA, CTSD, CD177	495	437	16713	1.69977	0.999999	0.172033	0.156012
	GOTERM_CC_FAT	GO:0005829~cytosol	149	26.8468	0.0209976	GDA, PANK1, DIXDC1, CIB2, ENO1, DCAF6, RASSF2, RASSF3, PSMD4, 1700017B05RIK, AKT2, NAMPT, PIM1, LONP1, PRKACA, PDK2, KCMF1, ATP6V1G1, UNC5A, RALGAPA2, PRKCE, TALDO1, PGD, BSCL2, ACLY, CDC34, ACOT2, ACOT1, MASP1, S100A9, S100A8, ACOT3, FKBP5, COX19, GRB7, PARM1, EPB41, MINDY2, ABHD5, ACAT2, ACACA, SULT1A1, PRDX3, APOO, EPB41L1, PRDX1, PCBP2, BAG1, PMVK, PGK1, PACSIN3, APOD, NDUFV2, PPARGC1A, NDUFV…	495	4323	16713	1.16372	0.999999	0.174094	0.157881
	GOTERM_CC_FAT	GO:0019814~immunoglobulin complex	15	2.7027	0.0256835	IGHV1-82, IGHV1-50, IGHV1-52, IGHV1-11, IGHV1-22, IGLV2, IGHV1-26, IGHG3, IGHV11-2, IGHG2C, IGHG1, IGHA, IGHV5-9, IGLC1, IGHV3-6	495	264	16713	1.91839	1	0.210284	0.1907
	GOTERM_CC_FAT	GO:0008541~proteasome regulatory particle, lid subcomplex	3	0.540541	0.0273516	PSMD12, ADRM1, PSMD3	495	9	16713	11.2545	1	0.221176	0.200578
	GOTERM_CC_FAT	GO:0030016~myofibril	14	2.52252	0.0332492	TMOD1, GLRX3, PDE4D, PPP2R5A, KCNA5, FBXO32, KCTD6, PSMA6, PDLIM3, MYL3, MYO18B, ALDOA, TIMP4, PGM1	495	248	16713	1.90601	1	0.265588	0.240854
	GOTERM_CC_FAT	GO:0033177~proton-transporting two-sector ATPase complex, proton-transporting domain	4	0.720721	0.036448	ATP5PB, ATP5G3, ATP5O, ATP5L	495	25	16713	5.40218	1	0.287632	0.260845
	GOTERM_CC_FAT	GO:0030017~sarcomere	13	2.34234	0.0373569	TMOD1, GLRX3, PPP2R5A, KCNA5, FBXO32, KCTD6, PSMA6, PDLIM3, MYL3, MYO18B, ALDOA, TIMP4, PGM1	495	226	16713	1.94216	1	0.291295	0.264166
	GOTERM_CC_FAT	GO:0032593~insulin-responsive compartment	3	0.540541	0.0401929	AKT2, MYO5A, SLC2A4	495	11	16713	9.20826	1	0.309722	0.280877
	GOTERM_CC_FAT	GO:0043292~contractile fiber	14	2.52252	0.0426008	TMOD1, GLRX3, PDE4D, PPP2R5A, KCNA5, FBXO32, KCTD6, PSMA6, PDLIM3, MYL3, MYO18B, ALDOA, TIMP4, PGM1	495	257	16713	1.83926	1	0.324459	0.294243
	GOTERM_CC_FAT	GO:0044449~contractile fiber part	13	2.34234	0.0496303	TMOD1, GLRX3, PPP2R5A, KCNA5, FBXO32, KCTD6, PSMA6, PDLIM3, MYL3, MYO18B, ALDOA, TIMP4, PGM1	495	237	16713	1.85201	1	0.373653	0.338855
	GOTERM_CC_FAT	GO:0008540~proteasome regulatory particle, base subcomplex	3	0.540541	0.0548373	PSMD4, PSMD5, PSMC1	495	13	16713	7.79161	1	0.408164	0.370152
	GOTERM_CC_FAT	GO:0016507~mitochondrial fatty acid beta-oxidation multienzyme complex	2	0.36036	0.0582437	HADHB, HADHA	495	2	16713	33.7636	1	0.419227	0.380184
	GOTERM_CC_FAT	GO:0009923~fatty acid elongase complex	2	0.36036	0.0582437	ELOVL6, HSD17B12	495	2	16713	33.7636	1	0.419227	0.380184
	GOTERM_CC_FAT	GO:0036125~fatty acid beta-oxidation multienzyme complex	2	0.36036	0.0582437	HADHB, HADHA	495	2	16713	33.7636	1	0.419227	0.380184
	GOTERM_CC_FAT	GO:0016529~sarcoplasmic reticulum	6	1.08108	0.077524	RASD1, STIM1, DMPK, AKT2, AGL, SLC2A4	495	77	16713	2.63093	1	0.551937	0.500536
	GOTERM_CC_FAT	GO:0016528~sarcoplasm	7	1.26126	0.0817663	RASD1, STIM1, DMPK, AKT2, AGL, IFRD1, SLC2A4	495	102	16713	2.31711	1	0.575881	0.522249
	GOTERM_CC_FAT	GO:0045242~isocitrate dehydrogenase complex (NAD+)	2	0.36036	0.0860833	IDH3G, IDH3B	495	3	16713	22.5091	1	0.593522	0.538247
	GOTERM_CC_FAT	GO:0005962~mitochondrial isocitrate dehydrogenase complex (NAD+)	2	0.36036	0.0860833	IDH3G, IDH3B	495	3	16713	22.5091	1	0.593522	0.538247
	GOTERM_CC_FAT	GO:0098589~membrane region	22	3.96396	0.0912109	SNAP25, SLC27A1, UNC5A, ATP5A1, RTN4RL2, KCNA5, ENO1, SLC2A4, ATP5B, GPRC5B, ADGRG1, STIM1, SGCA, CASP3, CTNNA1, PGK1, VDAC1, ADTRP, DRD1, PRKACA, CTSD, CD177	495	519	16713	1.43121	1	0.622325	0.564368
	GOTERM_CC_FAT	GO:0031314~extrinsic component of mitochondrial inner membrane	3	0.540541	0.0977353	ACADVL, DUSP18, COQ8A	495	18	16713	5.62727	1	0.659965	0.598503
	GOTERM_MF_FAT	GO:0050662~coenzyme binding	35	6.30631	2.97141e-17	ACADVL, HSD17B10, DDO, TM7SF2, HSD11B1, CYB5R3, ALDH2, ACADL, LDHD, ME1, IDH3B, ME2, ACADM, PRODH, NDUFV1, ACAD8, ACBD4, MDH1, IDH3G, FMO1, DHCR24, SDHA, PGD, GRHPR, SQLE, HADHA, ACOX2, CHDH, DPYD, CRY2, G6PDX, OGDH, NDUFS2, TKT, DLD	469	219	18102	6.16847	3.88363e-14	3.88363e-14	3.637e-14
	GOTERM_MF_FAT	GO:0048037~cofactor binding	39	7.02703	2.07597e-16	VKORC1L1, ACADVL, GPT, PYGL, HSD17B10, DDO, TM7SF2, HSD11B1, CYB5R3, ALDH2, ACADL, LDHD, ME1, IDH3B, ME2, ACADM, PRODH, NDUFV1, ACAD8, ACBD4, MDH1, IDH3G, FMO1, DHCR24, SDHD, SDHA, PGD, GRHPR, SQLE, HADHA, ACOX2, CHDH, DPYD, CRY2, G6PDX, OGDH, NDUFS2, TKT, DLD	469	294	18102	5.12001	2.90212e-13	1.35665e-13	1.27049e-13
	GOTERM_MF_FAT	GO:0036094~small molecule binding	129	23.2432	1.01361e-12	SLC27A1, ATP8A1, ACSM3, PANK1, ACSM5, TM7SF2, AKT2, NAMPT, PIM1, LONP1, PRKACA, MAP3K6, SEPHS2, MAP3K4, PDK2, PDK1, STARD5, DGAT1, ACSL1, PRKCE, ENTPD5, TALDO1, ACSL3, SDHA, PGD, ATAD3A, TUBA4A, ACLY, AFG3L2, RBP4, CDC34, VDAC1, S100A8, ACACB, ACACA, HSD11B1, SULT1A1, ATP5B, CYB5R3, GRPEL1, PPCS, LDHD, BAG1, PMVK, PGK1, APOD, PRODH, NDUFV1, FN3K, HSPA9, DMPK, MYO5A, DHCR24, ACSF2, ADCY10, SQLE, G…	469	2685	18102	1.85438	1.32482e-09	4.41594e-10	4.13551e-10
	GOTERM_MF_FAT	GO:0016614~oxidoreductase activity, acting on CH-OH group of donors	26	4.68468	1.73534e-12	VKORC1L1, DHRS11, HSD17B12, HSD17B10, HSD11B1, NSDHL, RDH11, LDHD, ME1, IDH3B, ME2, CBR2, MDH1, MDH2, IDH3G, PGD, GRHPR, HADHA, ZADH2, FASN, GPD2, CHDH, G6PDX, L2HGDH, GCLM, TUBA8	469	169	18102	5.938	2.26815e-09	5.67024e-10	5.31015e-10
	GOTERM_MF_FAT	GO:0015078~hydrogen ion transmembrane transporter activity	20	3.6036	9.19421e-12	ATP6V1G1, COX7B, COX8B, MT-CO1, ATP5PB, COX4I1, ATP5A1, ATP5G3, ATP5O, COX6A1, COX5A, UQCRH, ATP5L, LETM1, SLC9A2, ATP5B, UQCRQ, UQCRFS1, MT-CYTB, CYC1	469	100	18102	7.7194	1.20168e-08	2.40337e-09	2.25074e-09
	GOTERM_MF_FAT	GO:0016627~oxidoreductase activity, acting on the CH-CH group of donors	17	3.06306	2.12501e-11	ACAD8, PECR, ACADVL, PTGES2, TECR, DHCR24, ACAA1B, SDHD, SDHA, TM7SF2, ACADL, ACOX2, ZADH2, FASN, DPYD, ACADM, CRAT	469	70	18102	9.37356	2.77739e-08	4.62898e-09	4.33502e-09
	GOTERM_MF_FAT	GO:0016616~oxidoreductase activity, acting on the CH-OH group of donors, NAD or NADP as acceptor	23	4.14414	1.1264e-10	CBR2, DHRS11, MDH1, MDH2, IDH3G, HSD17B12, PGD, HSD17B10, HSD11B1, GRHPR, HADHA, NSDHL, RDH11, ZADH2, GPD2, FASN, G6PDX, LDHD, ME1, IDH3B, ME2, GCLM, TUBA8	469	157	18102	5.65434	1.47221e-07	2.10316e-08	1.9696e-08
	GOTERM_MF_FAT	GO:0000166~nucleotide binding	107	19.2793	2.22792e-10	SLC27A1, ATP8A1, ACSM3, PANK1, ACSM5, TM7SF2, AKT2, NAMPT, PIM1, LONP1, PRKACA, MAP3K6, SEPHS2, MAP3K4, PDK2, PDK1, ACSL1, PRKCE, ENTPD5, ACSL3, SDHA, PGD, ATAD3A, TUBA4A, ACLY, AFG3L2, CDC34, VDAC1, ACACB, ACACA, HSD11B1, SULT1A1, ATP5B, CYB5R3, GRPEL1, PPCS, LDHD, BAG1, PMVK, PGK1, PRODH, NDUFV1, FN3K, HSPA9, DMPK, MYO5A, DHCR24, ACSF2, ADCY10, SQLE, GRHPR, UCK1, TUBA8, ACADVL, ABCD3, DHRS11, C…	469	2232	18102	1.8503	2.91189e-07	3.23543e-08	3.02996e-08
	GOTERM_MF_FAT	GO:1901265~nucleoside phosphate binding	107	19.2793	2.22792e-10	SLC27A1, ATP8A1, ACSM3, PANK1, ACSM5, TM7SF2, AKT2, NAMPT, PIM1, LONP1, PRKACA, MAP3K6, SEPHS2, MAP3K4, PDK2, PDK1, ACSL1, PRKCE, ENTPD5, ACSL3, SDHA, PGD, ATAD3A, TUBA4A, ACLY, AFG3L2, CDC34, VDAC1, ACACB, ACACA, HSD11B1, SULT1A1, ATP5B, CYB5R3, GRPEL1, PPCS, LDHD, BAG1, PMVK, PGK1, PRODH, NDUFV1, FN3K, HSPA9, DMPK, MYO5A, DHCR24, ACSF2, ADCY10, SQLE, GRHPR, UCK1, TUBA8, ACADVL, ABCD3, DHRS11, C…	469	2232	18102	1.8503	2.91189e-07	3.23543e-08	3.02996e-08
	GOTERM_MF_FAT	GO:0050660~flavin adenine dinucleotide binding	17	3.06306	3.06095e-09	ACAD8, ACADVL, FMO1, DHCR24, SDHA, DDO, SQLE, CYB5R3, ACADL, ACOX2, CHDH, DPYD, LDHD, CRY2, ACADM, PRODH, DLD	469	96	18102	6.83489	4.00066e-06	4.00067e-07	3.74661e-07
	GOTERM_MF_FAT	GO:0051540~metal cluster binding	14	2.52252	2.89621e-08	ISCA1, GLRX3, GLRX5, CISD1, NDUFS8, DPYD, UQCRFS1, NDUFS2, ACO1, NDUFS1, ACO2, NDUFV2, MOCS1, NDUFV1	469	71	18102	7.61068	3.78527e-05	3.15445e-06	2.95413e-06
	GOTERM_MF_FAT	GO:0051536~iron-sulfur cluster binding	14	2.52252	2.89621e-08	ISCA1, GLRX3, GLRX5, CISD1, NDUFS8, DPYD, UQCRFS1, NDUFS2, ACO1, NDUFS1, ACO2, NDUFV2, MOCS1, NDUFV1	469	71	18102	7.61068	3.78527e-05	3.15445e-06	2.95413e-06
	GOTERM_MF_FAT	GO:0015077~monovalent inorganic cation transmembrane transporter activity	29	5.22523	6.14892e-08	SNAP25, COX7B, MT-CO1, COX4I1, ATP5A1, ATP1A3, KCNA5, ATP5G3, ATP5O, COX6A1, COX5A, UQCRH, ATP5L, ATP5B, UQCRFS1, CYC1, TMEM38B, SCN1B, ATP6V1G1, COX8B, ATP5PB, KCNB1, KCNJ15, LETM1, SLC9A2, SLC6A6, SLC6A9, UQCRQ, MT-CYTB	469	337	18102	3.3214	8.03632e-05	6.18203e-06	5.78945e-06
	GOTERM_MF_FAT	GO:0009055~electron carrier activity	12	2.16216	8.77891e-08	COX7B, COX8B, MT-CO1, COX4I1, CYCS, GLRX, NDUFS1, MT-CYTB, CYC1, SDHA, COX6A1, COX5A	469	53	18102	8.73895	0.000114734	7.79495e-06	7.29994e-06
	GOTERM_MF_FAT	GO:0043168~anion binding	123	22.1622	8.946e-08	ATP8A1, ACSM3, PANK1, ACSM5, CXCL13, ZFYVE26, AKT2, LIPG, PIM1, LONP1, PRKACA, MAP3K6, SEPHS2, MAP3K4, PDK2, PHLDA3, PDK1, STARD5, DGAT1, ACSL1, PRKCE, ENTPD5, ACSL3, SDHA, PGD, ATAD3A, TUBA4A, BSCL2, ACLY, AFG3L2, CDC34, VDAC1, S100A8, PTGES, LRPAP1, GRB7, EPB41, MGST2, LPAR3, ACACB, ACACA, SULT1A1, ATP5B, ADGRG1, CYB5R3, PPCS, LDHD, PMVK, PGK1, PACSIN3, PRODH, NDUFV1, FN3K, HSPA9, ACBD4, DMPK, …	469	3000	18102	1.58248	0.000116917	7.79495e-06	7.29994e-06
	GOTERM_MF_FAT	GO:0051287~NAD binding	13	2.34234	2.11653e-07	MDH1, IDH3G, HSD17B10, GRHPR, HADHA, CYB5R3, ALDH2, ME1, IDH3B, NDUFS2, ME2, DLD, NDUFV1	469	70	18102	7.16802	0.000276592	1.72894e-05	1.61914e-05
	GOTERM_MF_FAT	GO:0016679~oxidoreductase activity, acting on diphenols and related substances as donors	6	1.08108	2.27527e-07	UQCRQ, CYP1A1, UQCRFS1, MT-CYTB, CYC1, UQCRH	469	7	18102	33.0832	0.000297333	1.74928e-05	1.63819e-05
	GOTERM_MF_FAT	GO:0016746~transferase activity, transferring acyl groups	24	4.32432	3.82119e-07	PDHX, DGAT1, ACSM3, ELOVL5, ELOVL3, DLST, ELOVL6, ACSM5, ACAA1B, ABHD5, MCAT, TLCD3B, AGPAT2, ACAT2, HADHB, CS, ACLY, HADHA, LPCAT3, FASN, ASPG, DLAT, NAT8L, CRAT	469	263	18102	3.52216	0.000499305	2.77461e-05	2.59841e-05
	GOTERM_MF_FAT	GO:0003954~NADH dehydrogenase activity	9	1.62162	5.00535e-07	NDUFA9, MT-ND4L, NDUFS8, NDUFA10, NDUFS2, NDUFS1, NDUFV2, NDUFV1, MT-ND1	469	29	18102	11.9784	0.000653986	3.44316e-05	3.2245e-05
	GOTERM_MF_FAT	GO:0047760~butyrate-CoA ligase activity	6	1.08108	1.30765e-06	ACSS3, ACSM3, ACSM5, ACSL3, ACSF2, AACS	469	9	18102	25.7313	0.00170764	8.54551e-05	8.00283e-05
	GOTERM_MF_FAT	GO:0008137~NADH dehydrogenase (ubiquinone) activity	8	1.44144	1.74483e-06	MT-ND4L, NDUFS8, NDUFA10, NDUFS2, NDUFS1, NDUFV2, NDUFV1, MT-ND1	469	24	18102	12.8657	0.0022779	0.000108595	0.000101699
	GOTERM_MF_FAT	GO:0016903~oxidoreductase activity, acting on the aldehyde or oxo group of donors	12	2.16216	1.93977e-06	ALDH4A1, BCKDHA, ALDH3B2, PDHX, PDHA1, ALDH2, RDH11, OGDH, PDHB, DLAT, HSD17B12, DLD	469	71	18102	6.52344	0.00253206	0.00011524	0.000107921
	GOTERM_MF_FAT	GO:0016747~transferase activity, transferring acyl groups other than amino-acyl groups	21	3.78378	2.09664e-06	DGAT1, ACSM3, ELOVL5, ELOVL3, DLST, ELOVL6, ACSM5, ACAA1B, ABHD5, MCAT, TLCD3B, AGPAT2, ACAT2, HADHB, HADHA, LPCAT3, FASN, ASPG, DLAT, NAT8L, CRAT	469	228	18102	3.55499	0.00273655	0.000119144	0.000111577
	GOTERM_MF_FAT	GO:0050136~NADH dehydrogenase (quinone) activity	8	1.44144	2.36966e-06	MT-ND4L, NDUFS8, NDUFA10, NDUFS2, NDUFS1, NDUFV2, NDUFV1, MT-ND1	469	25	18102	12.351	0.00309235	0.000125047	0.000117106
	GOTERM_MF_FAT	GO:0016620~oxidoreductase activity, acting on the aldehyde or oxo group of donors, NAD or NADP as acceptor	11	1.98198	2.44799e-06	ALDH4A1, ALDH3B2, PDHX, PDHA1, ALDH2, RDH11, OGDH, PDHB, DLAT, HSD17B12, DLD	469	59	18102	7.19605	0.00319441	0.000125047	0.000117106
	GOTERM_MF_FAT	GO:1901681~sulfur compound binding	24	4.32432	2.48754e-06	LRPAP1, ACADVL, ACBD4, PCX, PTGES2, PANK1, ATP1A3, MGST2, HSD17B12, CXCL13, ACACB, ACACA, SULT1A1, SLC6A6, HADHA, ADGRG1, ACADL, LIPG, OGDH, RSPO3, ACADM, TKT, DLD, PTGES	469	293	18102	3.16153	0.00324593	0.000125047	0.000117106
	GOTERM_MF_FAT	GO:0043167~ion binding	213	38.3784	2.97988e-06	ISCA1, ACSM3, MT-CO1, PANK1, GDE1, CISD1, ACSM5, ENO1, ZFYVE26, AKT2, LIPG, LONP1, PRKACA, SEPHS2, PDK2, PDK1, STARD5, ACSL1, ENTPD5, PRKCE, ACSL3, AFG3L2, CDC34, LACTB2, MYL3, UQCRC1, CDIP1, VDAC1, UQCRC2, PTGES, LRPAP1, GRB7, EPB41, MGST2, LPAR3, SULT1A1, ATP5B, CYB5R3, PPCS, LDHD, ZBTB7B, FDFT1, DMPK, PMM1, MYO5A, TADA2B, SQLE, SLC6A6, UCK1, TCN2, FASN, CYP1A1, ATG2A, OGDH, GBE1, GPT, PYGL, PE…	469	6366	18102	1.29142	0.00388713	0.000144248	0.000135088
	GOTERM_MF_FAT	GO:0016651~oxidoreductase activity, acting on NAD(P)H	13	2.34234	5.42254e-06	NDUFA9, MT-ND4L, NDUFA10, GLRX, MT-ND1, CYB5R3, NDUFS8, PGK1, NDUFS2, NDUFS1, NDUFV2, DLD, NDUFV1	469	94	18102	5.33789	0.00706222	0.000244081	0.000228581
	GOTERM_MF_FAT	GO:0016878~acid-thiol ligase activity	8	1.44144	5.45745e-06	ACSS3, SLC27A1, ACSM3, ACSL1, ACSM5, ACSL3, ACSF2, AACS	469	28	18102	11.0277	0.00710753	0.000244081	0.000228581
	GOTERM_MF_FAT	GO:0004738~pyruvate dehydrogenase activity	5	0.900901	6.34947e-06	PDHX, PDHA1, PDHB, DLAT, DLD	469	6	18102	32.1642	0.00826445	0.000244081	0.000228581
	GOTERM_MF_FAT	GO:0034603~pyruvate dehydrogenase [NAD(P)+] activity	5	0.900901	6.34947e-06	PDHX, PDHA1, PDHB, DLAT, DLD	469	6	18102	32.1642	0.00826445	0.000244081	0.000228581
	GOTERM_MF_FAT	GO:0034604~pyruvate dehydrogenase (NAD+) activity	5	0.900901	6.34947e-06	PDHX, PDHA1, PDHB, DLAT, DLD	469	6	18102	32.1642	0.00826445	0.000244081	0.000228581
	GOTERM_MF_FAT	GO:0016681~oxidoreductase activity, acting on diphenols and related substances as donors, cytochrome as acceptor	5	0.900901	6.34947e-06	UQCRQ, UQCRFS1, MT-CYTB, CYC1, UQCRH	469	6	18102	32.1642	0.00826445	0.000244081	0.000228581
	GOTERM_MF_FAT	GO:0008121~ubiquinol-cytochrome-c reductase activity	5	0.900901	6.34947e-06	UQCRQ, UQCRFS1, MT-CYTB, CYC1, UQCRH	469	6	18102	32.1642	0.00826445	0.000244081	0.000228581
	GOTERM_MF_FAT	GO:0008324~cation transmembrane transporter activity	37	6.66667	9.13129e-06	SNAP25, COX7B, MT-CO1, COX4I1, ATP5A1, ATP1A3, KCNA5, ATP5G3, SLC2A4, ATP5O, COX6A1, COX5A, UQCRH, ATP5L, SLC25A48, ATP5B, UQCRFS1, CYC1, SLC25A20, TMEM38B, SCN1B, ATP6V1G1, COX8B, SLC15A2, SLC36A2, ATP5PB, KCNB1, MMGT1, KCNJ15, LETM1, SLC9A2, SLC6A6, STIM1, SLC6A9, UQCRQ, SFXN1, MT-CYTB	469	634	18102	2.25251	0.0118637	0.000340989	0.000319334
	GOTERM_MF_FAT	GO:0071949~FAD binding	9	1.62162	1.47055e-05	SQLE, CYB5R3, ACOX2, DPYD, CRY2, LDHD, DHCR24, PRODH, DDO	469	44	18102	7.89484	0.0190367	0.000533892	0.000499988
	GOTERM_MF_FAT	GO:0048029~monosaccharide binding	12	2.16216	2.25401e-05	GPI1, GYS1, EGLN3, UGP2, GYG, G6PDX, TALDO1, PGLS, PYGL, TKT, ALDOA, PFKM	469	91	18102	5.08972	0.0290305	0.000796214	0.000745651
	GOTERM_MF_FAT	GO:0022890~inorganic cation transmembrane transporter activity	31	5.58559	3.21537e-05	SNAP25, COX7B, MT-CO1, COX4I1, ATP5A1, ATP1A3, KCNA5, ATP5G3, ATP5O, COX6A1, COX5A, UQCRH, ATP5L, ATP5B, UQCRFS1, CYC1, TMEM38B, SCN1B, ATP6V1G1, COX8B, ATP5PB, KCNB1, MMGT1, KCNJ15, LETM1, SLC9A2, SLC6A6, STIM1, SLC6A9, UQCRQ, MT-CYTB	469	515	18102	2.32332	0.0411548	0.00110592	0.00103569
	GOTERM_MF_FAT	GO:0030145~manganese ion binding	10	1.8018	4.78437e-05	ADCY10, IDI1, NUDT7, GYG, PPM1M, PIM1, ME1, SOD2, PEPD, PRKACA	469	66	18102	5.84803	0.0606182	0.00160338	0.00150156
	GOTERM_MF_FAT	GO:0016874~ligase activity	15	2.7027	6.7686e-05	ACSS3, SLC27A1, PCX, ACSM3, ACSL1, HUWE1, ACSM5, ACSL3, ACACB, AACS, ACACA, ACSF2, TTLL7, PPCS, GCLM	469	159	18102	3.64123	0.0846681	0.00221164	0.00207119
	GOTERM_MF_FAT	GO:0051539~4 iron, 4 sulfur cluster binding	8	1.44144	7.7506e-05	NDUFS8, DPYD, NDUFS2, ACO1, NDUFS1, ACO2, MOCS1, NDUFV1	469	41	18102	7.53112	0.0963419	0.00241191	0.00225875
	GOTERM_MF_FAT	GO:0016877~ligase activity, forming carbon-sulfur bonds	8	1.44144	7.7506e-05	ACSS3, SLC27A1, ACSM3, ACSL1, ACSM5, ACSL3, ACSF2, AACS	469	41	18102	7.53112	0.0963419	0.00241191	0.00225875
	GOTERM_MF_FAT	GO:0030554~adenyl nucleotide binding	67	12.0721	8.13737e-05	ABCD3, ATP8A1, ACSM3, PANK1, CHD7, ACSM5, PYGL, CHD3, AACS, KHK, AKT2, MYO18B, PIM1, LONP1, KIF1C, PRKACA, MAP3K6, SEPHS2, MAP3K4, PDK2, PDK1, ACSL1, PDE4D, PRKCE, ENTPD5, ACSL3, ATAD3A, COASY, ACLY, AFG3L2, PKM, CDC34, MVD, ACSS3, DDX27, PRKAA2, PCX, ATP5A1, ATP1A3, ACACB, ACACA, SULT1A1, RECQL4, ATP5B, CYB5R3, GRPEL1, PPCS, BAG1, PMVK, PGK1, HSPA9, FN3K, DMPK, IDH3G, NTRK3, MYO5A, ACSF2, HIPK2,…	469	1591	18102	1.62539	0.100899	0.00247338	0.00231631
	GOTERM_MF_FAT	GO:0004129~cytochrome-c oxidase activity	6	1.08108	9.73879e-05	COX7B, COX8B, MT-CO1, COX4I1, COX6A1, COX5A	469	19	18102	12.1885	0.119524	0.00276709	0.00259137
	GOTERM_MF_FAT	GO:0015002~heme-copper terminal oxidase activity	6	1.08108	9.73879e-05	COX7B, COX8B, MT-CO1, COX4I1, COX6A1, COX5A	469	19	18102	12.1885	0.119524	0.00276709	0.00259137
	GOTERM_MF_FAT	GO:0016676~oxidoreductase activity, acting on a heme group of donors, oxygen as acceptor	6	1.08108	9.73879e-05	COX7B, COX8B, MT-CO1, COX4I1, COX6A1, COX5A	469	19	18102	12.1885	0.119524	0.00276709	0.00259137
	GOTERM_MF_FAT	GO:0016836~hydro-lyase activity	9	1.62162	0.000115909	HADHA, FASN, ECI1, ECHDC1, ACO1, ACO2, ENO1, TUBA8, CAR5B	469	58	18102	5.98919	0.140584	0.00322327	0.00301858
	GOTERM_MF_FAT	GO:0016655~oxidoreductase activity, acting on NAD(P)H, quinone or similar compound as acceptor	8	1.44144	0.00012357	MT-ND4L, NDUFS8, NDUFA10, NDUFS2, NDUFS1, NDUFV2, NDUFV1, MT-ND1	469	44	18102	7.01764	0.149147	0.00336472	0.00315104
	GOTERM_MF_FAT	GO:0016675~oxidoreductase activity, acting on a heme group of donors	6	1.08108	0.000127105	COX7B, COX8B, MT-CO1, COX4I1, COX6A1, COX5A	469	20	18102	11.5791	0.15307	0.00339033	0.00317503
	GOTERM_MF_FAT	GO:0015645~fatty acid ligase activity	6	1.08108	0.0001633	SLC27A1, ACSM3, ACSL1, ACSM5, ACSL3, ACSF2	469	21	18102	11.0277	0.192208	0.00426867	0.0039976
	GOTERM_MF_FAT	GO:0004312~fatty acid synthase activity	5	0.900901	0.000185121	ELOVL5, FASN, ELOVL3, ELOVL6, MCAT	469	12	18102	16.0821	0.214924	0.00474417	0.0044429
	GOTERM_MF_FAT	GO:0032559~adenyl ribonucleotide binding	65	11.7117	0.00019766	ABCD3, ATP8A1, ACSM3, PANK1, CHD7, ACSM5, PYGL, CHD3, AACS, KHK, AKT2, MYO18B, PIM1, LONP1, KIF1C, PRKACA, MAP3K6, SEPHS2, MAP3K4, PDK2, PDK1, ACSL1, PDE4D, PRKCE, ENTPD5, ACSL3, ATAD3A, COASY, ACLY, AFG3L2, PKM, CDC34, MVD, ACSS3, DDX27, PRKAA2, PCX, ATP5A1, ATP1A3, ACACB, ACACA, SULT1A1, RECQL4, ATP5B, CYB5R3, PPCS, PMVK, PGK1, HSPA9, FN3K, DMPK, IDH3G, NTRK3, MYO5A, ACSF2, HIPK2, BCKDK, TTLL7,…	469	1577	18102	1.59087	0.227688	0.00496811	0.00465261
	GOTERM_MF_FAT	GO:0016408~C-acyltransferase activity	6	1.08108	0.000206867	HADHB, HADHA, ACSM3, ACSM5, ACAA1B, ACAT2	469	22	18102	10.5265	0.236929	0.00508879	0.00476563
	GOTERM_MF_FAT	GO:0016628~oxidoreductase activity, acting on the CH-CH group of donors, NAD or NADP as acceptor	7	1.26126	0.000210248	PECR, PTGES2, ZADH2, FASN, DPYD, DHCR24, TM7SF2	469	34	18102	7.94644	0.240294	0.00508879	0.00476563
	GOTERM_MF_FAT	GO:0005496~steroid binding	13	2.34234	0.00034529	ESRRA, GRAMD1B, STARD5, INSIG1, RORC, RORA, PYGL, ATP5O, HSD17B10, HSD11B1, PGRMC2, APOD, VDAC1	469	143	18102	3.50882	0.363246	0.00820535	0.00768428
	GOTERM_MF_FAT	GO:0005536~glucose binding	5	0.900901	0.000359264	GYS1, UGP2, GYG, G6PDX, PYGL	469	14	18102	13.7846	0.374774	0.00838497	0.00785249
	GOTERM_MF_FAT	GO:0000287~magnesium ion binding	17	3.06306	0.000387118	IDI1, ATP8A1, IDH3G, CIB2, ENO1, ADCY10, NUDT7, PINK1, SNRK, PKM, PGP, ME1, IDH3B, MAP3K6, TKT, PRKACA, PGM1	469	233	18102	2.81609	0.397134	0.00887654	0.00831284
	GOTERM_MF_FAT	GO:0005524~ATP binding	62	11.1712	0.000471128	ABCD3, ATP8A1, ACSM3, PANK1, CHD7, ACSM5, PYGL, CHD3, AACS, KHK, AKT2, MYO18B, PIM1, LONP1, KIF1C, PRKACA, MAP3K6, SEPHS2, MAP3K4, PDK2, PDK1, ACSL1, PRKCE, ENTPD5, ACSL3, ATAD3A, COASY, ACLY, AFG3L2, PKM, CDC34, MVD, ACSS3, DDX27, PRKAA2, PCX, ATP5A1, ATP1A3, ACACB, ACACA, RECQL4, ATP5B, PPCS, PMVK, PGK1, HSPA9, FN3K, DMPK, IDH3G, NTRK3, MYO5A, ACSF2, HIPK2, BCKDK, TTLL7, ADCY10, SNRK, PINK1, UC…	469	1533	18102	1.561	0.459851	0.0106166	0.00994243
	GOTERM_MF_FAT	GO:0043531~ADP binding	7	1.26126	0.00052642	ATP5B, PKM, CYB5R3, ATP5A1, PGK1, LONP1, COQ8A	469	40	18102	6.75448	0.497526	0.0116615	0.010921
	GOTERM_MF_FAT	GO:0052689~carboxylic ester hydrolase activity	14	2.52252	0.000546395	PLA2G12A, DAGLA, DDHD2, GDE1, ABHD5, APMAP, ALDH2, ASPG, LIPG, ACOT2, ACOT1, PGLS, ACOT4, ACOT3	469	172	18102	3.14162	0.510482	0.0117235	0.010979
	GOTERM_MF_FAT	GO:0031956~medium-chain fatty acid-CoA ligase activity	4	0.720721	0.000556126	ACSM3, ACSM5, ACSL3, ACSF2	469	7	18102	22.0554	0.516672	0.0117235	0.010979
	GOTERM_MF_FAT	GO:0016615~malate dehydrogenase activity	4	0.720721	0.000556126	MDH1, MDH2, ME1, ME2	469	7	18102	22.0554	0.516672	0.0117235	0.010979
	GOTERM_MF_FAT	GO:0046933~proton-transporting ATP synthase activity, rotational mechanism	5	0.900901	0.00062692	ATP5B, ATP5PB, ATP5A1, ATP5O, ATP5L	469	16	18102	12.0616	0.55941	0.0130061	0.0121802
	GOTERM_MF_FAT	GO:0051537~2 iron, 2 sulfur cluster binding	6	1.08108	0.000679439	ISCA1, GLRX5, CISD1, UQCRFS1, NDUFS1, NDUFV2	469	28	18102	8.27079	0.588658	0.0138754	0.0129943
	GOTERM_MF_FAT	GO:0050661~NADP binding	8	1.44144	0.000710557	HSD11B1, GRHPR, DPYD, G6PDX, ME1, FMO1, PGD, TM7SF2	469	58	18102	5.32373	0.605063	0.0142877	0.0133803
	GOTERM_MF_FAT	GO:0003997~acyl-CoA oxidase activity	4	0.720721	0.000872744	ACADL, ACOX2, ACAA1B, CRAT	469	8	18102	19.2985	0.680556	0.0167747	0.0157094
	GOTERM_MF_FAT	GO:0016624~oxidoreductase activity, acting on the aldehyde or oxo group of donors, disulfide as acceptor	4	0.720721	0.000872744	BCKDHA, PDHA1, OGDH, PDHB	469	8	18102	19.2985	0.680556	0.0167747	0.0157094
	GOTERM_MF_FAT	GO:0003857~3-hydroxyacyl-CoA dehydrogenase activity	4	0.720721	0.000872744	HADHA, HSD17B12, HSD17B10, TUBA8	469	8	18102	19.2985	0.680556	0.0167747	0.0157094
	GOTERM_MF_FAT	GO:0016835~carbon-oxygen lyase activity	9	1.62162	0.000984074	HADHA, FASN, ECI1, ECHDC1, ACO1, ACO2, ENO1, TUBA8, CAR5B	469	79	18102	4.39713	0.723852	0.0186404	0.0174566
	GOTERM_MF_FAT	GO:0003988~acetyl-CoA C-acyltransferase activity	4	0.720721	0.00128405	HADHB, HADHA, ACAA1B, ACAT2	469	9	18102	17.1542	0.813502	0.0239751	0.0224526
	GOTERM_MF_FAT	GO:0042802~identical protein binding	87	15.6757	0.0013762	SLC27A1, ACADVL, ABCD3, PANK1, ECI1, BHLHE41, CISD1, CIB2, PYGL, ENO1, ALDH2, RASSF3, GYG, ACADL, PSMD4, MPC2, NAMPT, ME1, LONP1, MLX, LEPR, DLAT, ACADM, TMEM38B, PDK2, YWHAG, PDK1, TMEM14C, CBR2, MIGA2, DGAT1, GLRX3, GPX4, ATAD3A, KCTD6, PKM, STIM1, TRAF4, RILPL2, ACOX2, DPYD, G6PDX, TMEM79, UHRF1BP1, MVD, VDAC1, MASP1, ALDOA, TKT, GRB7, VAC14, NRN1, PCX, DERL1, MGST2, HSD17B10, ACACB, ACACA, SU…	469	2431	18102	1.3813	0.834691	0.0253338	0.023725
	GOTERM_MF_FAT	GO:0016289~CoA hydrolase activity	6	1.08108	0.00147562	NUDT7, ABCD3, ACOT2, ACOT1, ACOT4, ACOT3	469	33	18102	7.01764	0.85486	0.0267866	0.0250855
	GOTERM_MF_FAT	GO:0004300~enoyl-CoA hydratase activity	4	0.720721	0.00179929	HADHA, ECI1, ECHDC1, TUBA8	469	10	18102	15.4388	0.904991	0.0322146	0.0301688
	GOTERM_MF_FAT	GO:0034987~immunoglobulin receptor binding	14	2.52252	0.00189805	IGHV1-82, IGHV1-50, IGHV1-52, IGHV1-11, IGHV1-22, IGHV1-26, IGHG3, IGHV11-2, IGHG2C, IGHG1, IGHA, IGHV5-9, IGLC1, IGHV3-6	469	197	18102	2.74294	0.916517	0.0335237	0.0313948
	GOTERM_MF_FAT	GO:0016853~isomerase activity	13	2.34234	0.00193835	TRUB2, IDI1, PMM1, PTGES2, PGAM1, ECI1, LSS, GPI1, GALE, ACADM, PGM1, PTGES, FKBP5	469	174	18102	2.88369	0.920808	0.0337789	0.0316338
	GOTERM_MF_FAT	GO:0017076~purine nucleotide binding	72	12.973	0.00212351	ABCD3, ATP8A1, ACSM3, PANK1, CHD7, ACSM5, PYGL, CHD3, AACS, KHK, AKT2, MYO18B, PIM1, LONP1, KIF1C, PRKACA, MAP3K6, SEPHS2, MAP3K4, PDK2, PDK1, ACSL1, PDE4D, PRKCE, ENTPD5, ACSL3, ATAD3A, TUBA4A, COASY, ACLY, AFG3L2, PKM, CDC34, MVD, MOCS1, ACSS3, DDX27, PRKAA2, PCX, ATP5A1, ATP1A3, ACACB, ACACA, SULT1A1, RECQL4, ATP5B, CYB5R3, RASD1, GRPEL1, PPCS, BAG1, PMVK, PGK1, HSPA9, FN3K, DMPK, IDH3G, NTRK3…	469	1961	18102	1.41713	0.93786	0.0365187	0.0341996
	GOTERM_MF_FAT	GO:0016790~thiolester hydrolase activity	8	1.44144	0.00217347	NUDT7, ABCD3, FASN, CYP1A1, ACOT2, ACOT1, ACOT4, ACOT3	469	70	18102	4.41109	0.941797	0.0368926	0.0345498
	GOTERM_MF_FAT	GO:0032553~ribonucleotide binding	72	12.973	0.00223466	ABCD3, ATP8A1, ACSM3, PANK1, CHD7, ACSM5, PYGL, CHD3, AACS, KHK, AKT2, MYO18B, PIM1, LONP1, KIF1C, PRKACA, MAP3K6, SEPHS2, MAP3K4, PDK2, PDK1, ACSL1, PDE4D, PRKCE, ENTPD5, ACSL3, ATAD3A, TUBA4A, COASY, ACLY, AFG3L2, PKM, CDC34, MVD, MOCS1, ACSS3, DDX27, PRKAA2, PCX, ATP5A1, ATP1A3, ACACB, ACACA, SULT1A1, RECQL4, ATP5B, CYB5R3, RASD1, UGP2, PPCS, PMVK, PGK1, NDUFV1, HSPA9, FN3K, DMPK, IDH3G, NTRK3…	469	1965	18102	1.41424	0.94628	0.0374449	0.035067
	GOTERM_MF_FAT	GO:0044769~ATPase activity, coupled to transmembrane movement of ions, rotational mechanism	6	1.08108	0.00280766	ATP5B, ATP6V1G1, ATP5PB, ATP5A1, ATP5O, ATP5L	469	38	18102	6.09427	0.974645	0.0464507	0.0435009
	GOTERM_MF_FAT	GO:0016634~oxidoreductase activity, acting on the CH-CH group of donors, oxygen as acceptor	4	0.720721	0.00317399	ACADL, ACOX2, ACAA1B, CRAT	469	12	18102	12.8657	0.984314	0.0512149	0.0479625
	GOTERM_MF_FAT	GO:0003995~acyl-CoA dehydrogenase activity	4	0.720721	0.00317399	ACAD8, ACADVL, ACADL, ACADM	469	12	18102	12.8657	0.984314	0.0512149	0.0479625
	GOTERM_MF_FAT	GO:0016209~antioxidant activity	9	1.62162	0.00342186	PRDX3, GPX4, PRDX1, MGST2, GLRX, SOD2, S100A9, S100A8, PTGES	469	96	18102	3.61847	0.988667	0.0545411	0.0510775
	GOTERM_MF_FAT	GO:0016509~long-chain-3-hydroxyacyl-CoA dehydrogenase activity	3	0.540541	0.00386601	HADHA, HSD17B12, TUBA8	469	4	18102	28.9478	0.993671	0.0601533	0.0563333
	GOTERM_MF_FAT	GO:0009374~biotin binding	3	0.540541	0.00386601	PCX, ACACB, ACACA	469	4	18102	28.9478	0.993671	0.0601533	0.0563333
	GOTERM_MF_FAT	GO:0032555~purine ribonucleotide binding	70	12.6126	0.00405963	ABCD3, ATP8A1, ACSM3, PANK1, CHD7, ACSM5, PYGL, CHD3, AACS, KHK, AKT2, MYO18B, PIM1, LONP1, KIF1C, PRKACA, MAP3K6, SEPHS2, MAP3K4, PDK2, PDK1, ACSL1, PDE4D, PRKCE, ENTPD5, ACSL3, ATAD3A, TUBA4A, COASY, ACLY, AFG3L2, PKM, CDC34, MVD, MOCS1, ACSS3, DDX27, PRKAA2, PCX, ATP5A1, ATP1A3, ACACB, ACACA, SULT1A1, RECQL4, ATP5B, CYB5R3, RASD1, PPCS, PMVK, PGK1, HSPA9, FN3K, DMPK, IDH3G, NTRK3, SEPTIN6, MYO…	469	1946	18102	1.38838	0.995091	0.0614913	0.0575863
	GOTERM_MF_FAT	GO:0019842~vitamin binding	11	1.98198	0.00406803	EGLN3, RBP4, PCX, TCN2, FASN, OGDH, GPT, PYGL, TKT, ACACB, ACACA	469	143	18102	2.969	0.995145	0.0614913	0.0575863
	GOTERM_MF_FAT	GO:0032934~sterol binding	7	1.26126	0.00409315	GRAMD1B, STARD5, INSIG1, RORC, APOD, RORA, VDAC1	469	59	18102	4.57931	0.995302	0.0614913	0.0575863
	GOTERM_MF_FAT	GO:0000062~fatty-acyl-CoA binding	5	0.900901	0.00419826	HADHA, ACADVL, ACBD4, ACADL, ACADM	469	26	18102	7.4225	0.995908	0.0616532	0.0577379
	GOTERM_MF_FAT	GO:0016866~intramolecular transferase activity	5	0.900901	0.00419826	TRUB2, PMM1, PGAM1, LSS, PGM1	469	26	18102	7.4225	0.995908	0.0616532	0.0577379
	GOTERM_MF_FAT	GO:0046914~transition metal ion binding	44	7.92793	0.00478453	IDI1, PPM1M, GDA, CISD1, RORC, UBR3, RORA, MSMO1, PEPD, TRHDE, PTMS, RECQL4, GYG, MMP28, PIM1, ME1, SCD1, PRKACA, TIMP4, ESRRA, KCMF1, EGLN3, USP20, RNF24, SOD2, MMP8, ATAD3A, ATOX1, CYP51, CAR5B, TADA2B, ADCY10, AFG3L2, NUDT7, CYP2D22, TRAF4, LACTB2, ZADH2, DPYD, CYP1A1, LCN2, CDIP1, ACO2, S100A8	469	1103	18102	1.53968	0.998105	0.0694819	0.0650696
	GOTERM_MF_FAT	GO:0097367~carbohydrate derivative binding	81	14.5946	0.00538856	ABCD3, ATP8A1, ACSM3, PANK1, CHD7, ACSM5, PYGL, CHD3, CXCL13, AACS, KHK, AKT2, MYO18B, LIPG, PIM1, LONP1, KIF1C, RSPO3, PRKACA, MAP3K6, SEPHS2, MAP3K4, PDK2, PDK1, ACSL1, PDE4D, PRKCE, ENTPD5, ACSL3, ATAD3A, TUBA4A, COASY, ACLY, AFG3L2, PKM, CDC34, MVD, CHIL3, MOCS1, CHIL6, LRPAP1, ACSS3, DDX27, PRKAA2, PCX, LAMA1, ATP5A1, ATP1A3, HSD17B12, ACACB, ACACA, SULT1A1, RECQL4, ATP5B, ADGRG1, CYB5R3, RA…	469	2345	18102	1.3332	0.999143	0.0773939	0.0724791
	GOTERM_MF_FAT	GO:0030246~carbohydrate binding	17	3.06306	0.00624184	EGLN3, GBE1, AGL, TALDO1, PYGL, PGD, GPI1, ATRN, GYS1, UGP2, GYG, G6PDX, CHIL3, PGLS, TKT, ALDOA, PFKM	469	306	18102	2.14428	0.999721	0.087132	0.0815987
	GOTERM_MF_FAT	GO:0004740~pyruvate dehydrogenase (acetyl-transferring) kinase activity	3	0.540541	0.00633324	BCKDK, PDK2, PDK1	469	5	18102	23.1582	0.999752	0.087132	0.0815987
	GOTERM_MF_FAT	GO:0008142~oxysterol binding	3	0.540541	0.00633324	INSIG1, RORC, RORA	469	5	18102	23.1582	0.999752	0.087132	0.0815987
	GOTERM_MF_FAT	GO:0016401~palmitoyl-CoA oxidase activity	3	0.540541	0.00633324	ACADL, ACOX2, ACAA1B	469	5	18102	23.1582	0.999752	0.087132	0.0815987
	GOTERM_MF_FAT	GO:0035639~purine ribonucleoside triphosphate binding	67	12.0721	0.00711217	ABCD3, ATP8A1, ACSM3, PANK1, CHD7, ACSM5, PYGL, CHD3, AACS, KHK, AKT2, MYO18B, PIM1, LONP1, KIF1C, PRKACA, MAP3K6, SEPHS2, MAP3K4, PDK2, PDK1, ACSL1, PRKCE, ENTPD5, ACSL3, ATAD3A, TUBA4A, COASY, ACLY, AFG3L2, PKM, CDC34, MVD, MOCS1, ACSS3, DDX27, PRKAA2, PCX, ATP5A1, ATP1A3, ACACB, ACACA, RECQL4, ATP5B, RASD1, PPCS, PMVK, PGK1, HSPA9, FN3K, DMPK, IDH3G, NTRK3, SEPTIN6, MYO5A, ACSF2, HIPK2, BCKDK,…	469	1892	18102	1.36681	0.999911	0.0968292	0.0906801
	GOTERM_MF_FAT	GO:0047617~acyl-CoA hydrolase activity	5	0.900901	0.0079838	ABCD3, ACOT2, ACOT1, ACOT4, ACOT3	469	31	18102	6.22532	0.999972	0.107576	0.100744
	GOTERM_MF_FAT	GO:0043169~cation binding	134	24.1441	0.00929145	ISCA1, ATP8A1, ACSM3, MT-CO1, GDA, GDE1, CISD1, RORC, CIB2, ACSM5, RORA, MSMO1, ENO1, ZFYVE26, AKT2, LIPG, PIM1, PRKACA, MAP3K6, SEPHS2, MAP3K4, KCMF1, CADPS2, PRKCE, SDHD, ATAD3A, PRLR, ACLY, AFG3L2, CYP2D22, STIM1, LACTB2, GPD2, MYL3, UQCRC1, PGP, CDIP1, VDAC1, MASP1, UQCRC2, S100A9, S100A8, IDI1, UBR3, ACACB, TRHDE, ACACA, ATP5B, CYB5R3, ZKSCAN3, CYC1, DRD1, ZBTB7B, NDUFV2, NDUFV1, FDFT1, ESRR…	469	4285	18102	1.207	0.999995	0.122885	0.115081
	GOTERM_MF_FAT	GO:0097573~glutathione oxidoreductase activity	3	0.540541	0.00933785	GLRX3, GLRX5, GLRX	469	6	18102	19.2985	0.999995	0.122885	0.115081
	GOTERM_MF_FAT	GO:0019829~cation-transporting ATPase activity	7	1.26126	0.00940207	ATP5B, ATP6V1G1, ATP5PB, ATP5A1, ATP1A3, ATP5O, ATP5L	469	70	18102	3.8597	0.999996	0.122885	0.115081
	GOTERM_MF_FAT	GO:0022804~active transmembrane transporter activity	19	3.42342	0.00987783	SLC25A1, ATP6V1G1, SLC36A2, ABCD3, SLC15A2, ATP5PB, ATP5A1, ATP1A3, SLC2A4, ATP5O, ATP5L, LETM1, SLC9A2, ATP5B, SLC6A6, SLC6A9, SLC25A10, SLC25A22, ANK	469	378	18102	1.94006	0.999998	0.127825	0.119708
	GOTERM_MF_FAT	GO:0042625~ATPase coupled ion transmembrane transporter activity	7	1.26126	0.0114473	ATP5B, ATP6V1G1, ATP5PB, ATP5A1, ATP1A3, ATP5O, ATP5L	469	73	18102	3.70108	1	0.146683	0.137368
	GOTERM_MF_FAT	GO:0008289~lipid binding	35	6.30631	0.0123662	GRB7, GRAMD1B, LAMA1, EPB41, INSIG1, RORC, RORA, FITM2, LPAR3, ATP5G3, PYGL, ATP5O, HSD17B10, HSD11B1, ZFYVE26, PGRMC2, SEC14L4, PACSIN3, APOD, PHLDA3, ESRRA, CADPS2, STARD5, DGAT1, STARD10, APOC3, COQ9, ADAP1, BSCL2, RBP4, ACOX2, PEX3, ATG2A, VDAC1, S100A8	469	876	18102	1.54212	1	0.152688	0.142991
	GOTERM_MF_FAT	GO:0102336~3-oxo-arachidoyl-CoA synthase activity	3	0.540541	0.0128505	ELOVL5, ELOVL3, ELOVL6	469	7	18102	16.5416	1	0.152688	0.142991
	GOTERM_MF_FAT	GO:0016885~ligase activity, forming carbon-carbon bonds	3	0.540541	0.0128505	PCX, ACACB, ACACA	469	7	18102	16.5416	1	0.152688	0.142991
	GOTERM_MF_FAT	GO:0016215~acyl-CoA desaturase activity	3	0.540541	0.0128505	FADS2, SCD1, FADS1	469	7	18102	16.5416	1	0.152688	0.142991
	GOTERM_MF_FAT	GO:0102337~3-oxo-cerotoyl-CoA synthase activity	3	0.540541	0.0128505	ELOVL5, ELOVL3, ELOVL6	469	7	18102	16.5416	1	0.152688	0.142991
	GOTERM_MF_FAT	GO:0009922~fatty acid elongase activity	3	0.540541	0.0128505	ELOVL5, ELOVL3, ELOVL6	469	7	18102	16.5416	1	0.152688	0.142991
	GOTERM_MF_FAT	GO:0003985~acetyl-CoA C-acetyltransferase activity	3	0.540541	0.0128505	HADHB, ACAA1B, ACAT2	469	7	18102	16.5416	1	0.152688	0.142991
	GOTERM_MF_FAT	GO:0102338~3-oxo-lignoceronyl-CoA synthase activity	3	0.540541	0.0128505	ELOVL5, ELOVL3, ELOVL6	469	7	18102	16.5416	1	0.152688	0.142991
	GOTERM_MF_FAT	GO:0033293~monocarboxylic acid binding	8	1.44144	0.0135901	STARD5, PCX, ACOX2, DGAT1, PYGL, ACACB, ACACA, S100A8	469	98	18102	3.15078	1	0.158948	0.148854
	GOTERM_MF_FAT	GO:0016830~carbon-carbon lyase activity	6	1.08108	0.0136206	ECHDC1, ME1, MVD, ME2, ALDOA, MOCS1	469	55	18102	4.21058	1	0.158948	0.148854
	GOTERM_MF_FAT	GO:0003823~antigen binding	16	2.88288	0.013773	IGHV1-82, IGHV1-50, IGHV1-52, IGHV1-11, IGHV1-22, DHCR24, IGHV1-26, IGHG3, IGHV11-2, IGHG2C, IGHG1, IGHA, IGHV5-9, IGLC1, IGHV3-6, H2-Q10	469	306	18102	2.01814	1	0.159303	0.149187
	GOTERM_MF_FAT	GO:0051117~ATPase binding	8	1.44144	0.0150561	ADCY10, ATP6V1G1, PEX19, GRPEL1, PDE4D, DERL1, DRD1, ATOX1	469	100	18102	3.08776	1	0.172617	0.161655
	GOTERM_MF_FAT	GO:0033218~amide binding	20	3.6036	0.0155004	PEX19, PCX, PTGES2, ATP1A3, MGST2, DHCR24, LDLRAD3, ACACB, HSD17B10, PRLR, TRHDE, SORL1, ACACA, FASN, LEPR, VDAC1, DLD, CTSD, H2-Q10, PTGES	469	425	18102	1.81633	1	0.176165	0.164978
	GOTERM_MF_FAT	GO:0016453~C-acetyltransferase activity	3	0.540541	0.0168431	HADHB, ACAA1B, ACAT2	469	8	18102	14.4739	1	0.189776	0.177724
	GOTERM_MF_FAT	GO:0046872~metal ion binding	129	23.2432	0.0179167	ISCA1, ATP8A1, ACSM3, MT-CO1, GDA, GDE1, CISD1, RORC, CIB2, ACSM5, RORA, MSMO1, ENO1, ZFYVE26, AKT2, LIPG, PIM1, PRKACA, MAP3K6, SEPHS2, MAP3K4, KCMF1, CADPS2, PRKCE, SDHD, ATAD3A, PRLR, ACLY, AFG3L2, CYP2D22, STIM1, LACTB2, GPD2, MYL3, UQCRC1, PGP, CDIP1, MASP1, UQCRC2, S100A9, S100A8, IDI1, UBR3, ACACB, TRHDE, ACACA, ATP5B, ZKSCAN3, CYC1, ZBTB7B, NDUFV2, NDUFV1, FDFT1, ESRRA, DMPK, PMM1, MYO5A,…	469	4190	18102	1.18831	1	0.200147	0.187437
	GOTERM_MF_FAT	GO:0044594~17-beta-hydroxysteroid dehydrogenase (NAD+) activity	3	0.540541	0.0212886	DHRS11, HSD17B12, HSD17B10	469	9	18102	12.8657	1	0.235798	0.220824
	GOTERM_MF_FAT	GO:0046943~carboxylic acid transmembrane transporter activity	10	1.8018	0.0218337	SLC25A1, SLC6A6, SLC36A2, SLC6A9, MPC1, MPC2, SLC25A10, SFXN1, SLC25A22, SLC25A44	469	158	18102	2.44285	1	0.239804	0.224575
	GOTERM_MF_FAT	GO:0042623~ATPase activity, coupled	13	2.34234	0.0253603	ATP6V1G1, ABCD3, ATP5PB, ATP5A1, CHD7, ATP1A3, CHD3, ATP5O, ATP5L, ATP5B, AFG3L2, PSMC1, LONP1	469	244	18102	2.0564	1	0.275596	0.258094
	GOTERM_MF_FAT	GO:0019899~enzyme binding	77	13.8739	0.0255142	RNF14, BHLHE41, DIXDC1, ENO1, GPI1, GYS1, ZFYVE26, RIMS4, CHCHD3, CNST, AKT2, CASP3, LONP1, PRKACA, TIMP4, YWHAG, CD177, IL15RA, SREBF1, ATP6V1G1, GLRX3, PDE4D, PRKCE, PGAM1, PPP2R5A, TIMM23, MYRIP, ACSL3, PRLR, TUBA4A, RNF144B, GPRC5B, STIM1, TRAF4, CRY2, UQCRC1, NDUFS2, UHRF1BP1, VDAC1, CHIL3, ALDOA, CHIL6, GRB7, LRPAP1, ATP5A1, DERL1, KCNA5, TOB1, ACACA, PRDX3, ALS2CL, GRPEL1, PCBP2, BAG1, DRD…	469	2365	18102	1.25665	1	0.275596	0.258094
	GOTERM_MF_FAT	GO:0005342~organic acid transmembrane transporter activity	10	1.8018	0.0260581	SLC25A1, SLC6A6, SLC36A2, SLC6A9, MPC1, MPC2, SLC25A10, SFXN1, SLC25A22, SLC25A44	469	163	18102	2.36792	1	0.275745	0.258234
	GOTERM_MF_FAT	GO:0016868~intramolecular transferase activity, phosphotransferases	3	0.540541	0.0261609	PMM1, PGAM1, PGM1	469	10	18102	11.5791	1	0.275745	0.258234
	GOTERM_MF_FAT	GO:0043878~glyceraldehyde-3-phosphate dehydrogenase (NAD+) (non-phosphorylating) activity	3	0.540541	0.0261609	ALDH4A1, ALDH3B2, ALDH2	469	10	18102	11.5791	1	0.275745	0.258234
	GOTERM_MF_FAT	GO:0033764~steroid dehydrogenase activity, acting on the CH-OH group of donors, NAD or NADP as acceptor	5	0.900901	0.0306351	HSD11B1, NSDHL, DHRS11, HSD17B12, HSD17B10	469	46	18102	4.19533	1	0.32032	0.299979
	GOTERM_MF_FAT	GO:0047676~arachidonate-CoA ligase activity	3	0.540541	0.0314352	SLC27A1, ACSL1, ACSL3	469	11	18102	10.5265	1	0.32351	0.302966
	GOTERM_MF_FAT	GO:0016717~oxidoreductase activity, acting on paired donors, with oxidation of a pair of donors resulting in the reduction of molecular oxygen to two molecules of water	3	0.540541	0.0314352	FADS2, SCD1, FADS1	469	11	18102	10.5265	1	0.32351	0.302966
	GOTERM_MF_FAT	GO:0046906~tetrapyrrole binding	11	1.98198	0.0325625	CYP2D22, PGRMC2, TCN2, PTGES2, MT-CO1, PRDX1, CYP1A1, CYCS, SDHD, CYC1, CYP51	469	197	18102	2.15516	1	0.332493	0.311379
	GOTERM_MF_FAT	GO:0031406~carboxylic acid binding	12	2.16216	0.0412369	GRHPR, EGLN3, STARD5, PCX, ACOX2, DGAT1, PYGL, PGD, PRODH, ACACB, ACACA, S100A8	469	234	18102	1.97933	1	0.41741	0.390903
	GOTERM_MF_FAT	GO:0016417~S-acyltransferase activity	4	0.720721	0.0416057	FASN, DLST, DLAT, MCAT	469	30	18102	5.14627	1	0.41741	0.390903
	GOTERM_MF_FAT	GO:0042626~ATPase activity, coupled to transmembrane movement of substances	8	1.44144	0.0421762	ATP5B, ATP6V1G1, ABCD3, ATP5PB, ATP5A1, ATP1A3, ATP5O, ATP5L	469	124	18102	2.49013	1	0.41741	0.390903
	GOTERM_MF_FAT	GO:0016820~hydrolase activity, acting on acid anhydrides, catalyzing transmembrane movement of substances	8	1.44144	0.0421762	ATP5B, ATP6V1G1, ABCD3, ATP5PB, ATP5A1, ATP1A3, ATP5O, ATP5L	469	124	18102	2.49013	1	0.41741	0.390903
	GOTERM_MF_FAT	GO:0008374~O-acyltransferase activity	5	0.900901	0.0424756	DGAT1, LPCAT3, ABHD5, AGPAT2, CRAT	469	51	18102	3.78402	1	0.41741	0.390903
	GOTERM_MF_FAT	GO:0022853~active ion transmembrane transporter activity	8	1.44144	0.0437306	SLC6A6, ATP5B, ATP6V1G1, ATP5PB, ATP5A1, ATP1A3, ATP5O, ATP5L	469	125	18102	2.47021	1	0.426537	0.39945
	GOTERM_MF_FAT	GO:0016229~steroid dehydrogenase activity	5	0.900901	0.0451124	HSD11B1, NSDHL, DHRS11, HSD17B12, HSD17B10	469	52	18102	3.71125	1	0.435553	0.407894
	GOTERM_MF_FAT	GO:0015405~P-P-bond-hydrolysis-driven transmembrane transporter activity	8	1.44144	0.0453215	ATP5B, ATP6V1G1, ABCD3, ATP5PB, ATP5A1, ATP1A3, ATP5O, ATP5L	469	126	18102	2.4506	1	0.435553	0.407894
	GOTERM_MF_FAT	GO:0015399~primary active transmembrane transporter activity	8	1.44144	0.0469492	ATP5B, ATP6V1G1, ABCD3, ATP5PB, ATP5A1, ATP1A3, ATP5O, ATP5L	469	127	18102	2.43131	1	0.445696	0.417393
	GOTERM_MF_FAT	GO:0016407~acetyltransferase activity	7	1.26126	0.047059	HADHB, FASN, ACAA1B, DLAT, NAT8L, CRAT, ACAT2	469	101	18102	2.67504	1	0.445696	0.417393
	GOTERM_MF_FAT	GO:0043492~ATPase activity, coupled to movement of substances	8	1.44144	0.0486137	ATP5B, ATP6V1G1, ABCD3, ATP5PB, ATP5A1, ATP1A3, ATP5O, ATP5L	469	128	18102	2.41231	1	0.453804	0.424986
	GOTERM_MF_FAT	GO:0016668~oxidoreductase activity, acting on a sulfur group of donors, NAD(P) as acceptor	3	0.540541	0.0494348	PGK1, GLRX, DLD	469	14	18102	8.27079	1	0.453804	0.424986
	GOTERM_MF_FAT	GO:0016418~S-acetyltransferase activity	2	0.36036	0.05104	FASN, DLAT	469	2	18102	38.597	1	0.453804	0.424986
	GOTERM_MF_FAT	GO:0004314~[acyl-carrier-protein] S-malonyltransferase activity	2	0.36036	0.05104	FASN, MCAT	469	2	18102	38.597	1	0.453804	0.424986
	GOTERM_MF_FAT	GO:0016213~linoleoyl-CoA desaturase activity	2	0.36036	0.05104	FADS2, FADS1	469	2	18102	38.597	1	0.453804	0.424986
	GOTERM_MF_FAT	GO:0016420~malonyltransferase activity	2	0.36036	0.05104	FASN, MCAT	469	2	18102	38.597	1	0.453804	0.424986
	GOTERM_MF_FAT	GO:0047780~citrate dehydratase activity	2	0.36036	0.05104	ACO1, ACO2	469	2	18102	38.597	1	0.453804	0.424986
	GOTERM_MF_FAT	GO:0016419~S-malonyltransferase activity	2	0.36036	0.05104	FASN, MCAT	469	2	18102	38.597	1	0.453804	0.424986
	GOTERM_MF_FAT	GO:0010945~CoA pyrophosphatase activity	2	0.36036	0.05104	NUDT7, FITM2	469	2	18102	38.597	1	0.453804	0.424986
	GOTERM_MF_FAT	GO:0019900~kinase binding	32	5.76577	0.0553909	GRB7, DIXDC1, KCNA5, TOB1, ACACA, PRDX3, GYS1, ZFYVE26, AKT2, PRKACA, YWHAG, SH2B2, IL15RA, SREBF1, GLRX3, PRKCE, PGAM1, PPP2R5A, MYO5A, ACSL3, PRLR, TUBA4A, MLXIPL, PINK1, GPRC5B, DLG2, TRAF4, CRY2, CHIL3, VDAC1, PFKM, CHIL6	469	888	18102	1.39088	1	0.482273	0.451647
	GOTERM_MF_FAT	GO:0020037~heme binding	10	1.8018	0.0559464	CYP2D22, PGRMC2, PTGES2, MT-CO1, PRDX1, CYP1A1, CYCS, SDHD, CYC1, CYP51	469	188	18102	2.05303	1	0.482273	0.451647
	GOTERM_MF_FAT	GO:0002020~protease binding	10	1.8018	0.0559464	PINK1, STIM1, CASP3, ADRM1, ATP5A1, LCN2, DERL1, ALDOA, TIMP4, CD177	469	188	18102	2.05303	1	0.482273	0.451647
	GOTERM_MF_FAT	GO:0004467~long-chain fatty acid-CoA ligase activity	3	0.540541	0.0560868	SLC27A1, ACSL1, ACSL3	469	15	18102	7.7194	1	0.482273	0.451647
	GOTERM_MF_FAT	GO:0004303~estradiol 17-beta-dehydrogenase activity	3	0.540541	0.0560868	DHRS11, HSD17B12, HSD17B10	469	15	18102	7.7194	1	0.482273	0.451647
	GOTERM_MF_FAT	GO:0043177~organic acid binding	12	2.16216	0.0582208	GRHPR, EGLN3, STARD5, PCX, ACOX2, DGAT1, PYGL, PGD, PRODH, ACACB, ACACA, S100A8	469	248	18102	1.8676	1	0.49735	0.465766
	GOTERM_MF_FAT	GO:0015291~secondary active transmembrane transporter activity	12	2.16216	0.0589566	LETM1, SLC9A2, SLC25A1, SLC6A6, SLC36A2, SLC15A2, SLC6A9, ATP1A3, SLC25A10, SLC2A4, SLC25A22, ANK	469	249	18102	1.8601	1	0.500365	0.46859
	GOTERM_MF_FAT	GO:0102991~myristoyl-CoA hydrolase activity	3	0.540541	0.0630303	ACOT2, ACOT1, ACOT3	469	16	18102	7.23694	1	0.531488	0.497736
	GOTERM_MF_FAT	GO:0016667~oxidoreductase activity, acting on a sulfur group of donors	5	0.900901	0.0660581	GLRX3, GLRX5, PGK1, GLRX, DLD	469	59	18102	3.27093	1	0.553448	0.518302
	GOTERM_MF_FAT	GO:0016831~carboxy-lyase activity	4	0.720721	0.0698747	ECHDC1, ME1, MVD, ME2	469	37	18102	4.17265	1	0.570975	0.534716
	GOTERM_MF_FAT	GO:0004029~aldehyde dehydrogenase (NAD) activity	3	0.540541	0.0702459	ALDH4A1, ALDH3B2, ALDH2	469	17	18102	6.81124	1	0.570975	0.534716
	GOTERM_MF_FAT	GO:0016301~kinase activity	29	5.22523	0.0722213	PRKAA2, PANK1, KHK, RASSF2, AKT2, PMVK, PIM1, PGK1, MAP3K6, PRKACA, SEPHS2, MAP3K4, PDK2, PDK1, FN3K, DMPK, PRKCE, NTRK3, COASY, HIPK2, MUP3, BCKDK, PINK1, SNRK, UCK1, PKM, COQ8A, PALS2, PFKM	469	811	18102	1.38016	1	0.570975	0.534716
	GOTERM_MF_FAT	GO:0004601~peroxidase activity	5	0.900901	0.0728275	PRDX3, GPX4, PRDX1, MGST2, PTGES	469	61	18102	3.16369	1	0.570975	0.534716
	GOTERM_MF_FAT	GO:0016709~oxidoreductase activity, acting on paired donors, with incorporation or reduction of molecular oxygen, NAD(P)H as one donor, and incorporation of one atom of oxygen	5	0.900901	0.0728275	SQLE, CYP1A1, FMO1, MSMO1, CYP51	469	61	18102	3.16369	1	0.570975	0.534716
	GOTERM_MF_FAT	GO:0015171~amino acid transmembrane transporter activity	6	1.08108	0.0748673	SLC6A6, SLC36A2, SLC6A9, SFXN1, SLC25A22, SLC25A44	469	87	18102	2.66186	1	0.570975	0.534716
	GOTERM_MF_FAT	GO:0004739~pyruvate dehydrogenase (acetyl-transferring) activity	2	0.36036	0.0755766	PDHA1, PDHB	469	3	18102	25.7313	1	0.570975	0.534716
	GOTERM_MF_FAT	GO:0008177~succinate dehydrogenase (ubiquinone) activity	2	0.36036	0.0755766	SDHD, SDHA	469	3	18102	25.7313	1	0.570975	0.534716
	GOTERM_MF_FAT	GO:0090434~oleoyl-CoA ligase activity	2	0.36036	0.0755766	SLC27A1, ACSL1	469	3	18102	25.7313	1	0.570975	0.534716
	GOTERM_MF_FAT	GO:0030060~L-malate dehydrogenase activity	2	0.36036	0.0755766	MDH1, MDH2	469	3	18102	25.7313	1	0.570975	0.534716
[truncated: 1,779 more rows]

## Sheet: OS vs CSdeg ∩ AS vs CSnondeg
	Category	Term	Count	%	PValue	Genes	List Total	Pop Hits	Pop Total	Fold Enrichment	Bonferroni	Benjamini	FDR
[truncated: 3,027 more rows]

## Sheet: AS vs CSdeg ∩ OS vs CSnondeg
	Category	Term	Count	%	PValue	Genes	List Total	Pop Hits	Pop Total	Fold Enrichment	Bonferroni	Benjamini	FDR
[truncated: 2,448 more rows]
